# Supplementary material for: A longitudinal single-nucleus transcriptomic atlas of the bovine placenta reveals dynamic cellular hierarchies and regulatory networks during gestation
Source: Research Square preprint supplement (doi:10.21203/rs.3.rs-8046408/v1), 2025-11-26
Supplement: Supplementary file 1 [file 0388242e27a8835ab8e46e17.xlsx]

## Sheet: S1
Supplementary Data 1. Quality filtering
sample	rep	Number of cells
		Before filtering	After filtering	nCount_RNA_mean	nCount_RNA_median	nFeature_RNA_mean	nFeature_RNA_median
	TP_4_1-1	10172	9961	2688.63	1922	1380.29	1274
E60	TP_4_1-2	9708	9488	2381.88	1720	1277.43	1173.5
	TP_4_1-3	10984	10654	6639.96	4698.5	2445.74	2351
	TP_3_1-1	6582	6127	4877.34	3477	2080.14	1983
E85	TP_3_1-2	6615	6141	5427.16	3859	2222.61	2126
	TP_3_1-3	6626	6152	5399.03	3844.5	2214.57	2115.5
E110	C5_3_TP-1	10042	9517	3115.57	2278	1587.12	1480
	C5_3_TP-2	10240	9107	5133.51	3616	2138.07	2027
	TP_3_1-1	6582	6127	4877.34	3477	2080.14	1983
E85	TP_3_1-2	6615	6141	5427.16	3859	2222.61	2126
	TP_3_1-3	6626	6152	5399.03	3844.5	2214.57	2115.5
	TP_6_4-1	10299	9393	2575.24	1837	1413.56	1284
E180	TP_6_4-2	8738	8349	1628.62	1192	1039.48	916
	TP_6_4-3	10639	8843	3780.78	2606	1795.26	1655
	TP_C3_1-1	10094	9852	2788.66	1723	1327.14	1168
E280	TP_C3_1-2	8269	8055	2030.32	1286	1076.77	931
	TP_C3_1-3	10851	10612	3900.22	2417	1659.75	1499
Total number of cells		149682	140671				1659.26

## Sheet: S2
Supplementary Data 2. Benchmarking of data integration methods
Metric type	Bio conservation	Bio conservation	Bio conservation	Bio conservation	Bio conservation	Batch correction	Batch correction	Batch correction	Batch correction	Aggregate score	Aggregate score	Aggregate score
Methods	Isolated labels	KMeans NMI	KMeans ARI	Silhouette label	cLISI	Silhouette batch	iLISI	KBET	Graph connectivity	Batch correction	Bio conservation	Total
BBKNN	0.456247	0.593027	0.248512	0.414513	0.984607	0.708075	0.0615997	0.126884	0.419816	0.329094	0.539381	0.44592
fastMNN	0.507455	0.598479	0.271854	0.437527	0.988252	0.66047	0.0681534	0.0990021	0.453324	0.320237	0.560713	0.453835
Harmony	0.334584	0.475385	0.17482	0.302811	0.972005	0.735856	0.119562	0.167876	0.308325	0.332905	0.451921	0.399025
Scanorama	0.528687	0.632935	0.313206	0.416886	0.991435	0.662538	0.0576853	0.115079	0.492809	0.332028	0.57663	0.467918
scVI	0.52622	0.622312	0.30258	0.450642	0.988932	0.68176	0.0614545	0.11751	0.489719	0.337611	0.578137	0.471237
CCA	0.419162	0.371927	0.120322	0.316281	0.952797	0.745234	0.163692	0.105044	0.187299	0.300317	0.436098	0.375751

## Sheet: S3
Supplementary Data 3. All sample details
sample	nCount_RNA_mean	nCount_RNA_median	nFeature_RNA_mean	nFeature_RNA_median
C5_3_TP-1	3115.57	2278	1587.12	1480
C5_3_TP-2	5133.51	3616	2138.07	2027
SRR24859101_D18	4408.71	3767	1278.13	1191
SRR24859102_D18	3926.81	2054.5	1411.72	1075
SRR24859103_D16	4019.2	2027	1373.05	1048
SRR24859104_D14	2413.18	2268.5	1074.82	1039
SRR24859105_D14	10493.7	6067	2392.48	1799
SRR24859106_D14	6808.68	4462.5	2000.01	1704.5
SRR24859107_D14	9489.44	3599	2137.8	1376
SRR24859108_D16	2336.98	1790	1040.23	916
SRR24859109_D12	11265.5	2109	1837.21	854
SRR24859110_D12	9235.88	2091	1898.73	864
SRR24880360	14692.6	10158	3105.37	3182
SRR24880361	16340.1	10558	3281.47	3392
SRR24880362	9527.45	5352.5	2489.34	2146.5
SRR24880363	16894.9	6527	2911.2	2339
SRR24880364	21508.4	12458	3490.41	3460.5
SRR24880365	15442.5	5962	2551.07	1827.5
SRR24880366	18071.6	5431	2805.78	1928
SRR24880367	6302.28	5523	2197.07	2174
SRR24880368	7789.6	6053	2422.25	2439.5
SRR24880369	6712.69	4272	2135.82	1925
TP_3_1-1	4877.34	3477	2080.14	1983
TP_3_1-2	5427.16	3859	2222.61	2126
TP_3_1-3	5399.03	3844.5	2214.57	2115.5
TP_4_1-1	2688.63	1922	1380.29	1274
TP_4_1-2	2381.88	1720	1277.43	1173.5
TP_4_1-3	6639.96	4698.5	2445.74	2351
TP_6_4-1	2575.24	1837	1413.56	1284
TP_6_4-2	1628.62	1192	1039.48	916
TP_6_4-3	3780.78	2606	1795.26	1655
TP_C3_1-1	2788.66	1723	1327.14	1168
TP_C3_1-2	2030.32	1286	1076.77	931
TP_C3_1-3	3900.22	2417	1659.75	1499
TP_C4_2-1	3582.51	3057.5	1821.26	1760
TP_C4_2-2	4068.22	3509	1972.41	1926
TP_C4_2-3	4052.6	3482	1966.3	1917

## Sheet: S4
p_val	avg_log2FC	pct.1	pct.2	p_val_adj	gene	cluster
0	9.11668	0.876	0.017	0	ESYT3	Tro_B5
0	8.00842	0.848	0.011	0	GLIS1	Tro_B5
0	7.58484	0.966	0.09	0	SOBP	Tro_B5
0	7.46381	0.907	0.056	0	LRP8	Tro_B5
0	6.80788	0.547	0.024	0	GALNT18	Tro_B5
0	6.64604	0.956	0.127	0	MARCHF3	Tro_B5
0	6.57656	0.59	0.007	0	CHD5	Tro_B5
0	6.5236	0.827	0.039	0	LRRC8C	Tro_B5
0	6.51029	0.942	0.08	0	TMEFF1	Tro_B5
0	6.46171	0.918	0.205	0	HPCAL1	Tro_B5
0	6.43554	0.605	0.006	0	TMEM221	Tro_B5
0	6.43298	0.564	0.006	0	ME3	Tro_B5
0	6.24587	0.581	0.009	0	ENSBTAG00000026637	Tro_B5
0	6.22795	0.731	0.017	0	SVOP	Tro_B5
0	6.05737	0.882	0.074	0	ENSBTAG00000045746	Tro_B5
0	5.97584	0.705	0.071	0	TTC28	Tro_B5
0	5.97304	0.881	0.152	0	CNNM2	Tro_B5
0	5.97088	0.676	0.098	0	ABCC1	Tro_B5
0	5.93256	0.724	0.092	0	RCSD1	Tro_B5
0	5.86688	0.695	0.025	0	KANK4	Tro_B5
0	5.85006	0.545	0.032	0	PCBP3	Tro_B5
0	5.82528	0.72	0.032	0	SLC9A7	Tro_B5
0	5.79963	0.618	0.013	0	HPD	Tro_B5
0	5.78017	0.764	0.02	0	CAVIN4	Tro_B5
0	5.69634	0.877	0.082	0	ALDH1L2	Tro_B5
0	5.63831	0.846	0.031	0	KHK	Tro_B5
0	5.63594	0.929	0.066	0	PRNP	Tro_B5
0	5.59597	0.619	0.052	0	ARG2	Tro_B5
0	5.59028	0.655	0.033	0	TMC7	Tro_B5
0	5.50477	0.92	0.057	0	SCNN1G	Tro_B5
0	5.48812	0.772	0.034	0	ABHD3	Tro_B5
0	5.48288	0.834	0.097	0	DEPDC7	Tro_B5
0	5.46392	0.906	0.116	0	DNMT3B	Tro_B5
0	5.45803	0.893	0.204	0	TENT4B	Tro_B5
0	5.45535	0.766	0.044	0	SPATA21	Tro_B5
0	5.44281	0.929	0.117	0	SOCS5	Tro_B5
0	5.43742	0.907	0.17	0	KCTD20	Tro_B5
0	5.39939	0.988	0.345	0	YAP1	Tro_B5
0	5.38868	0.601	0.042	0	PKP1	Tro_B5
0	5.37878	0.943	0.168	0	GRB10	Tro_B5
0	5.34527	0.829	0.084	0	CLSTN1	Tro_B5
0	5.33338	0.916	0.177	0	DENND5A	Tro_B5
0	5.33176	0.961	0.289	0	G2E3	Tro_B5
0	5.31879	0.504	0.013	0	ACOT11	Tro_B5
0	5.31601	0.705	0.029	0	STK36	Tro_B5
0	5.31333	0.85	0.054	0	MMAA	Tro_B5
0	5.30434	0.868	0.057	0	GDPD5	Tro_B5
0	5.28696	0.846	0.101	0	PRKAG2	Tro_B5
0	5.28644	0.64	0.031	0	C1H3orf52	Tro_B5
0	5.26995	0.762	0.06	0	ENSBTAG00000052570	Tro_B5
0	5.24381	0.79	0.077	0	PLEKHH2	Tro_B5
0	5.22207	0.723	0.217	0	ENSBTAG00000010131	Tro_B5
0	5.17926	0.957	0.191	0	TGFBR3	Tro_B5
0	5.15921	0.965	0.292	0	FAM135A	Tro_B5
0	5.14331	0.974	0.35	0	GPAT3	Tro_B5
0	5.1358	0.884	0.138	0	ABLIM3	Tro_B5
0	5.13239	0.774	0.105	0	LDLR	Tro_B5
0	5.11868	0.614	0.023	0	ENSBTAG00000050906	Tro_B5
0	5.11326	0.83	0.049	0	ACKR2	Tro_B5
0	5.06086	0.914	0.115	0	ARHGEF10L	Tro_B5
0	5.02737	0.965	0.236	0	GSR	Tro_B5
0	4.98672	0.879	0.215	0	ATF2	Tro_B5
0	4.97351	0.958	0.476	0	TMEM135	Tro_B5
0	4.97093	0.877	0.07	0	EDNRB	Tro_B5
0	4.93502	0.924	0.121	0	SDC2	Tro_B5
0	4.92827	0.839	0.051	0	TRIB3	Tro_B5
0	4.92654	0.685	0.056	0	RHBDL2	Tro_B5
0	4.92358	0.797	0.035	0	S1PR1	Tro_B5
0	4.9103	0.87	0.24	0	ENPP1	Tro_B5
0	4.89726	0.859	0.128	0	FAM107B	Tro_B5
0	4.8903	0.788	0.074	0	SCNN1B	Tro_B5
0	4.88531	0.89	0.284	0	TET3	Tro_B5
0	4.88022	0.91	0.219	0	RRAS2	Tro_B5
0	4.87408	0.871	0.077	0	EEF2K	Tro_B5
0	4.87275	0.615	0.025	0	ENSBTAG00000051512	Tro_B5
0	4.84682	0.788	0.156	0	DNMBP	Tro_B5
0	4.83332	0.951	0.349	0	PDS5B	Tro_B5
0	4.81979	0.743	0.09	0	CMTR1	Tro_B5
0	4.80598	0.865	0.124	0	BRD3	Tro_B5
0	4.80533	0.82	0.099	0	CCDC126	Tro_B5
0	4.78654	0.631	0.047	0	FXYD6	Tro_B5
0	4.77286	0.937	0.34	0	NPTN	Tro_B5
0	4.75297	0.776	0.105	0	TCP11L1	Tro_B5
0	4.75283	0.778	0.107	0	SMIM14	Tro_B5
0	4.72563	0.575	0.02	0	FCHO1	Tro_B5
0	4.6877	0.836	0.075	0	PTGFRN	Tro_B5
0	4.68531	0.838	0.158	0	IFNGR1	Tro_B5
0	4.66435	0.927	0.188	0	DHX40	Tro_B5
0	4.65165	0.887	0.226	0	PDK1	Tro_B5
0	4.64219	0.889	0.355	0	RBBP8	Tro_B5
0	4.63798	0.673	0.034	0	KIF14	Tro_B5
0	4.63346	0.823	0.16	0	RCL1	Tro_B5
0	4.59626	0.574	0.035	0	ARMC2	Tro_B5
0	4.59224	0.542	0.06	0	DYNC2I1	Tro_B5
0	4.59199	0.584	0.021	0	CD247	Tro_B5
0	4.59011	0.927	0.176	0	TIPARP	Tro_B5
0	4.58374	0.87	0.256	0	QSER1	Tro_B5
0	4.56945	0.661	0.084	0	FRMD4A	Tro_B5
0	4.56661	0.93	0.311	0	PHF21A	Tro_B5
0	4.56628	0.899	0.363	0	EGLN1	Tro_B5
0	4.56435	0.91	0.253	0	MERTK	Tro_B5
0	4.56274	0.948	0.305	0	ARHGAP17	Tro_B5
0	4.54068	0.546	0.026	0	ENSBTAG00000030470	Tro_B5
0	4.53665	0.892	0.241	0	WDR72	Tro_B5
0	4.52708	0.635	0.077	0	BPGM	Tro_B5
0	4.52314	0.888	0.196	0	WSB2	Tro_B5
0	4.51405	0.805	0.207	0	TCAF1	Tro_B5
0	4.48685	0.571	0.077	0	NOL4	Tro_B5
0	4.48026	0.539	0.037	0	ZCCHC24	Tro_B5
0	4.47891	0.598	0.027	0	EPHB3	Tro_B5
0	4.45395	0.539	0.083	0	SEC14L6	Tro_B5
0	4.43726	0.905	0.202	0	RUFY3	Tro_B5
0	4.40455	0.835	0.12	0	PDE6D	Tro_B5
0	4.40162	0.533	0.026	0	TVP23A	Tro_B5
0	4.39644	0.901	0.205	0	MLLT1	Tro_B5
0	4.39397	0.983	0.478	0	GPBP1	Tro_B5
0	4.38981	0.663	0.228	0	PAPSS2	Tro_B5
0	4.3719	0.613	0.047	0	FBXL19	Tro_B5
0	4.3683	0.695	0.047	0	SH2B3	Tro_B5
0	4.36013	0.543	0.033	0	ANKRD50	Tro_B5
0	4.35387	0.944	0.383	0	AGFG1	Tro_B5
0	4.34271	0.737	0.074	0	FAM117A	Tro_B5
0	4.3383	0.883	0.154	0	TSNARE1	Tro_B5
0	4.33297	0.942	0.322	0	NT5E	Tro_B5
0	4.33274	0.74	0.071	0	ENSBTAG00000055110	Tro_B5
0	4.32113	0.736	0.113	0	PCGF5	Tro_B5
0	4.31557	0.955	0.344	0	VKORC1L1	Tro_B5
0	4.30912	0.759	0.1	0	GTPBP1	Tro_B5
0	4.29989	0.92	0.295	0	SLC39A10	Tro_B5
0	4.28626	0.769	0.088	0	RIGI	Tro_B5
0	4.28594	0.91	0.164	0	VAV2	Tro_B5
0	4.28478	0.712	0.113	0	NID2	Tro_B5
0	4.27347	0.749	0.106	0	TMEM120B	Tro_B5
0	4.26621	0.787	0.068	0	HS6ST1	Tro_B5
0	4.25802	0.832	0.259	0	SSBP3	Tro_B5
0	4.25686	0.765	0.106	0	GALNT11	Tro_B5
0	4.25685	0.638	0.028	0	SPON1	Tro_B5
0	4.25353	0.85	0.154	0	TDRD7	Tro_B5
0	4.25261	0.759	0.213	0	GAS7	Tro_B5
0	4.22783	0.932	0.364	0	PTPN11	Tro_B5
0	4.2153	0.656	0.089	0	WDPCP	Tro_B5
0	4.21126	0.746	0.081	0	FBXO28	Tro_B5
0	4.19842	0.872	0.226	0	HEATR3	Tro_B5
0	4.19503	0.888	0.443	0	COBLL1	Tro_B5
0	4.18145	0.858	0.177	0	CORO2A	Tro_B5
0	4.17981	0.913	0.207	0	ERRFI1	Tro_B5
0	4.17873	0.774	0.112	0	SCMH1	Tro_B5
0	4.16821	0.909	0.194	0	MTHFD2	Tro_B5
0	4.16613	0.872	0.176	0	FBXL5	Tro_B5
0	4.15791	0.72	0.121	0	FAM117B	Tro_B5
0	4.15707	0.85	0.167	0	EPB41L1	Tro_B5
0	4.14303	0.938	0.223	0	GRSF1	Tro_B5
0	4.14195	0.868	0.129	0	ZNF438	Tro_B5
0	4.12357	0.849	0.145	0	CA12	Tro_B5
0	4.11312	0.767	0.117	0	TTC7A	Tro_B5
0	4.10224	0.567	0.043	0	ABCA4	Tro_B5
0	4.09419	0.685	0.064	0	RNF6	Tro_B5
0	4.07497	0.993	0.49	0	WWC2	Tro_B5
0	4.07219	0.857	0.098	0	CCDC30	Tro_B5
0	4.07112	0.893	0.233	0	ETS2	Tro_B5
0	4.06707	0.805	0.104	0	PCID2	Tro_B5
0	4.06222	0.574	0.045	0	FGD5	Tro_B5
0	4.05174	0.932	0.447	0	EVI5	Tro_B5
0	4.04735	0.529	0.038	0	ANKRD22	Tro_B5
0	4.04205	0.928	0.189	0	GRB7	Tro_B5
0	4.02878	0.848	0.166	0	TFCP2	Tro_B5
0	4.01525	0.675	0.073	0	FIBIN	Tro_B5
0	4.01524	0.907	0.353	0	EFR3A	Tro_B5
0	4.01195	0.973	0.405	0	MYO9A	Tro_B5
0	4.00734	0.535	0.032	0	ABHD1	Tro_B5
0	4.00031	0.835	0.161	0	ARHGEF11	Tro_B5
0	3.9979	0.713	0.082	0	PLEKHF1	Tro_B5
0	3.98538	0.957	0.448	0	RRBP1	Tro_B5
0	3.95737	0.816	0.171	0	RALGPS2	Tro_B5
0	3.94448	0.851	0.183	0	CDC42EP3	Tro_B5
0	3.93764	0.935	0.2	0	AQP11	Tro_B5
0	3.93371	0.735	0.082	0	C8H9orf64	Tro_B5
0	3.93368	0.866	0.126	0	GARRE1	Tro_B5
0	3.93104	0.922	0.255	0	AKIRIN1	Tro_B5
0	3.92828	0.906	0.266	0	PTPN3	Tro_B5
0	3.92182	0.794	0.123	0	ZNF280B	Tro_B5
0	3.92138	0.864	0.203	0	WDR82	Tro_B5
0	3.91968	0.799	0.239	0	TBC1D9	Tro_B5
0	3.91738	0.861	0.352	0	NCK1	Tro_B5
0	3.90322	0.908	0.194	0	FCHSD2	Tro_B5
0	3.8885	0.937	0.248	0	MKRN1	Tro_B5
0	3.88589	0.698	0.18	0	DNAAF9	Tro_B5
0	3.88416	0.82	0.145	0	SESTD1	Tro_B5
0	3.88397	0.894	0.276	0	NDFIP1	Tro_B5
0	3.87561	0.875	0.237	0	CRAMP1	Tro_B5
0	3.87515	0.866	0.254	0	MARCHF6	Tro_B5
0	3.87053	0.954	0.165	0	ADM	Tro_B5
0	3.85362	0.662	0.104	0	SNX18	Tro_B5
0	3.84044	0.873	0.246	0	MTR	Tro_B5
0	3.83527	0.661	0.098	0	RCAN3	Tro_B5
0	3.83456	0.616	0.048	0	RASSF8	Tro_B5
0	3.8331	0.972	0.407	0	EIF4G3	Tro_B5
0	3.83206	0.903	0.335	0	RSU1	Tro_B5
0	3.82452	0.625	0.082	0	FMN1	Tro_B5
0	3.8232	0.885	0.309	0	RAB31	Tro_B5
0	3.80588	0.653	0.096	0	SAV1	Tro_B5
0	3.80268	0.863	0.15	0	SLC5A6	Tro_B5
0	3.79701	0.506	0.069	0	TNFAIP3	Tro_B5
0	3.79448	0.925	0.309	0	ASXL2	Tro_B5
0	3.79302	0.768	0.109	0	SNAPC1	Tro_B5
0	3.78308	0.927	0.415	0	WWTR1	Tro_B5
0	3.77909	0.881	0.235	0	SPATS2L	Tro_B5
0	3.77346	0.798	0.108	0	HDAC5	Tro_B5
0	3.7666	0.939	0.508	0	FNBP1L	Tro_B5
0	3.76341	0.542	0.175	0	SUGCT	Tro_B5
0	3.74794	0.817	0.196	0	TOPORS	Tro_B5
0	3.74393	0.808	0.169	0	BICD2	Tro_B5
0	3.73103	0.772	0.217	0	IGF2R	Tro_B5
0	3.70575	0.521	0.05	0	CSF1R	Tro_B5
0	3.7056	0.775	0.223	0	KIF23	Tro_B5
0	3.70017	0.686	0.074	0	TMEM184B	Tro_B5
0	3.69845	0.935	0.243	0	ZFP36L2	Tro_B5
0	3.69575	0.951	0.334	0	ANKRD10	Tro_B5
0	3.69404	0.707	0.268	0	PLEKHA7	Tro_B5
0	3.68549	0.543	0.068	0	PLK2	Tro_B5
0	3.64265	0.901	0.169	0	MKNK2	Tro_B5
0	3.6369	0.892	0.29	0	FUT8	Tro_B5
0	3.63144	0.869	0.189	0	PDCD4	Tro_B5
0	3.61899	0.827	0.218	0	AGPAT5	Tro_B5
0	3.59773	0.884	0.271	0	PPIH	Tro_B5
0	3.58928	0.87	0.185	0	C24H18orf25	Tro_B5
0	3.5861	0.75	0.068	0	CYP4A22	Tro_B5
0	3.57891	0.644	0.089	0	CNEP1R1	Tro_B5
0	3.57618	0.939	0.378	0	VPS26A	Tro_B5
0	3.57285	0.9	0.288	0	USP6NL	Tro_B5
0	3.56238	0.88	0.304	0	SLC30A9	Tro_B5
0	3.55851	0.807	0.145	0	SIKE1	Tro_B5
0	3.55203	0.811	0.187	0	SNX27	Tro_B5
0	3.53033	0.911	0.396	0	SEC63	Tro_B5
0	3.52961	0.505	0.04	0	ENSBTAG00000051975	Tro_B5
0	3.52414	0.835	0.186	0	UTP3	Tro_B5
0	3.52047	0.542	0.063	0	SLC25A32	Tro_B5
0	3.51411	0.883	0.23	0	KCNK1	Tro_B5
0	3.50455	0.61	0.099	0	SLC35E3	Tro_B5
0	3.50088	0.874	0.311	0	VPS54	Tro_B5
0	3.49848	0.552	0.101	0	KCNK5	Tro_B5
0	3.49609	0.919	0.263	0	PALS2	Tro_B5
0	3.48095	0.853	0.207	0	BTBD3	Tro_B5
0	3.4774	0.859	0.509	0	VGLL4	Tro_B5
0	3.47244	0.859	0.238	0	CNKSR3	Tro_B5
0	3.46934	0.624	0.059	0	SLC27A4	Tro_B5
0	3.45603	0.722	0.128	0	ADNP2	Tro_B5
0	3.45061	0.522	0.066	0	KLF11	Tro_B5
0	3.44929	0.834	0.156	0	TFRC	Tro_B5
0	3.44838	0.882	0.243	0	MPZL1	Tro_B5
0	3.44401	0.946	0.117	0	FZD4	Tro_B5
0	3.43907	0.891	0.365	0	SEC24D	Tro_B5
0	3.42885	0.652	0.122	0	SLC19A2	Tro_B5
0	3.42283	0.88	0.235	0	SEC14L1	Tro_B5
0	3.417	0.796	0.147	0	ENSBTAG00000002290	Tro_B5
0	3.41136	0.894	0.274	0	RCC2	Tro_B5
0	3.3997	0.933	0.279	0	MDM4	Tro_B5
0	3.39626	0.532	0.067	0	WNT10B	Tro_B5
0	3.39406	0.637	0.068	0	RIPOR3	Tro_B5
0	3.38988	0.815	0.194	0	JAK2	Tro_B5
0	3.38849	0.75	0.146	0	TEAD4	Tro_B5
0	3.37814	0.918	0.397	0	TRIM33	Tro_B5
0	3.36533	0.507	0.038	0	GJB6	Tro_B5
0	3.3623	0.87	0.243	0	DNAJC6	Tro_B5
0	3.35781	0.752	0.147	0	PRSS23	Tro_B5
0	3.35017	0.943	0.236	0	ATP1B1	Tro_B5
0	3.34564	0.948	0.451	0	AMD1	Tro_B5
0	3.34169	0.597	0.082	0	RNF25	Tro_B5
0	3.33386	0.859	0.161	0	RGS7	Tro_B5
0	3.32986	0.795	0.226	0	MEMO1	Tro_B5
0	3.32226	0.758	0.184	0	AZI2	Tro_B5
0	3.32003	0.632	0.095	0	ST3GAL1	Tro_B5
0	3.31077	0.924	0.507	0	ELOVL6	Tro_B5
0	3.3055	0.778	0.152	0	ITGA3	Tro_B5
0	3.29456	0.846	0.295	0	CDK8	Tro_B5
0	3.29065	0.755	0.262	0	SHOC2	Tro_B5
0	3.26717	0.564	0.097	0	TSPAN14	Tro_B5
0	3.26166	0.797	0.415	0	STRBP	Tro_B5
0	3.26101	0.923	0.325	0	TDRD3	Tro_B5
0	3.25729	0.525	0.068	0	GAS2	Tro_B5
0	3.25318	0.765	0.152	0	GARIN1A	Tro_B5
0	3.23346	0.909	0.359	0	GPBP1L1	Tro_B5
0	3.23208	0.864	0.156	0	INPP4B	Tro_B5
0	3.2266	0.613	0.128	0	CENPM	Tro_B5
0	3.22237	0.697	0.247	0	CDK6	Tro_B5
0	3.21535	0.772	0.155	0	SNAP23	Tro_B5
0	3.21011	0.924	0.154	0	GJB2	Tro_B5
0	3.20962	0.56	0.09	0	ENSBTAG00000052465	Tro_B5
0	3.20448	0.885	0.307	0	WDR5	Tro_B5
0	3.19777	0.893	0.234	0	TXNDC12	Tro_B5
0	3.19685	0.906	0.363	0	MDM2	Tro_B5
0	3.19545	0.934	0.433	0	MAP7	Tro_B5
0	3.19513	0.88	0.357	0	GAPVD1	Tro_B5
0	3.19315	0.797	0.245	0	YTHDF2	Tro_B5
0	3.19255	0.733	0.204	0	UEVLD	Tro_B5
0	3.18989	0.897	0.308	0	CCDC186	Tro_B5
0	3.18268	0.943	0.495	0	STRN3	Tro_B5
0	3.17775	0.935	0.469	0	ARHGAP10	Tro_B5
0	3.1761	0.664	0.209	0	CPEB2	Tro_B5
0	3.16885	0.958	0.351	0	DDX3X	Tro_B5
0	3.1686	0.7	0.156	0	RAD51	Tro_B5
0	3.16686	0.665	0.135	0	SIAH2	Tro_B5
0	3.15876	0.732	0.241	0	FOXK2	Tro_B5
0	3.1579	0.86	0.314	0	STX12	Tro_B5
0	3.15541	0.961	0.608	0	SMAP1	Tro_B5
0	3.14181	0.878	0.213	0	ARHGEF5	Tro_B5
0	3.13487	0.53	0.067	0	KCTD5	Tro_B5
0	3.13131	0.914	0.303	0	CLASP2	Tro_B5
0	3.12754	0.709	0.188	0	PRCC	Tro_B5
0	3.12212	0.952	0.484	0	GSPT1	Tro_B5
0	3.11781	0.926	0.463	0	ZZZ3	Tro_B5
0	3.117	0.648	0.131	0	CAD	Tro_B5
0	3.11497	0.66	0.077	0	MGARP	Tro_B5
0	3.11174	0.799	0.176	0	CUL4A	Tro_B5
0	3.10757	0.775	0.303	0	DIP2C	Tro_B5
0	3.10458	0.627	0.244	0	NR3C1	Tro_B5
0	3.08889	0.656	0.094	0	IMPACT	Tro_B5
0	3.088	0.663	0.135	0	PYGB	Tro_B5
0	3.08036	0.951	0.467	0	ITGB1	Tro_B5
0	3.08014	0.609	0.164	0	KLHL7	Tro_B5
0	3.07202	0.645	0.122	0	LAMB2	Tro_B5
0	3.05439	0.906	0.281	0	PCNX1	Tro_B5
0	3.04604	0.63	0.102	0	SLC39A14	Tro_B5
0	3.04284	0.92	0.392	0	LSM14A	Tro_B5
0	3.03615	0.522	0.084	0	PPM1K	Tro_B5
0	3.02892	0.719	0.288	0	RCAN2	Tro_B5
0	3.02842	0.838	0.306	0	PRKAR2A	Tro_B5
0	3.02116	0.554	0.078	0	ATP2B2	Tro_B5
0	3.01931	0.721	0.161	0	KIF11	Tro_B5
0	3.01202	0.85	0.176	0	INSIG1	Tro_B5
0	3.01139	0.504	0.069	0	ZNF394	Tro_B5
0	2.99486	0.772	0.188	0	MOB1A	Tro_B5
0	2.98608	0.545	0.109	0	LMBRD2	Tro_B5
0	2.98432	0.777	0.165	0	STARD13	Tro_B5
0	2.98191	0.918	0.446	0	KCMF1	Tro_B5
0	2.97573	0.51	0.064	0	SFI1	Tro_B5
0	2.97444	0.748	0.213	0	SAMD8	Tro_B5
0	2.97103	0.893	0.418	0	TESK2	Tro_B5
0	2.97032	0.787	0.192	0	PLEC	Tro_B5
0	2.95258	0.553	0.11	0	SIPA1L2	Tro_B5
0	2.95136	0.694	0.238	0	DLGAP5	Tro_B5
0	2.94378	0.731	0.321	0	RNF2	Tro_B5
0	2.9437	0.825	0.293	0	BMPR2	Tro_B5
0	2.94231	0.566	0.096	0	MEF2D	Tro_B5
0	2.93814	0.841	0.257	0	SINHCAF	Tro_B5
0	2.92762	0.708	0.143	0	MIB1	Tro_B5
0	2.9088	0.861	0.366	0	ARHGAP29	Tro_B5
0	2.89869	0.744	0.283	0	TET2	Tro_B5
0	2.89737	0.505	0.086	0	SYNE3	Tro_B5
0	2.89164	0.736	0.072	0	SECTM1A	Tro_B5
0	2.88469	0.737	0.154	0	CRYBG1	Tro_B5
0	2.86559	0.937	0.339	0	ERBB2	Tro_B5
0	2.85144	0.821	0.376	0	RYBP	Tro_B5
0	2.84226	0.656	0.119	0	MFAP3L	Tro_B5
0	2.84113	0.565	0.086	0	COMMD2	Tro_B5
0	2.83664	0.863	0.28	0	NF2	Tro_B5
0	2.83121	0.906	0.37	0	PARD6B	Tro_B5
0	2.82999	0.837	0.214	0	PPFIBP1	Tro_B5
0	2.82665	0.782	0.314	0	TP53BP2	Tro_B5
0	2.82142	0.694	0.199	0	WDHD1	Tro_B5
0	2.82072	0.736	0.22	0	PPP4R1	Tro_B5
0	2.81801	0.646	0.183	0	GGCT	Tro_B5
0	2.81674	0.89	0.513	0	NASP	Tro_B5
0	2.81544	0.908	0.359	0	DEGS1	Tro_B5
0	2.81424	0.876	0.347	0	ERP44	Tro_B5
0	2.80991	0.514	0.114	0	TBC1D8	Tro_B5
0	2.80456	0.778	0.291	0	PTPN13	Tro_B5
0	2.8019	0.824	0.525	0	CHCHD3	Tro_B5
0	2.79312	0.824	0.242	0	AK4	Tro_B5
0	2.79251	0.627	0.144	0	STXBP4	Tro_B5
0	2.78282	0.75	0.364	0	YEATS2	Tro_B5
0	2.77911	0.872	0.324	0	HMOX2	Tro_B5
0	2.77837	0.655	0.177	0	AMOTL1	Tro_B5
0	2.7752	0.728	0.279	0	ENSBTAG00000039662	Tro_B5
0	2.76993	0.882	0.374	0	RICTOR	Tro_B5
0	2.76987	0.853	0.328	0	TLK1	Tro_B5
0	2.76594	0.74	0.322	0	SLC39A11	Tro_B5
0	2.76095	0.872	0.353	0	SCFD1	Tro_B5
0	2.74704	0.725	0.282	0	FOXO3	Tro_B5
0	2.74331	0.899	0.44	0	FNIP1	Tro_B5
0	2.73951	0.948	0.419	0	PABPC4	Tro_B5
0	2.73768	0.665	0.145	0	FEM1C	Tro_B5
0	2.73431	0.795	0.233	0	TMEM120A	Tro_B5
4.77099e-277	2.71906	0.555	0.291	9.25573e-273	PIK3C3	Tro_B5
0	2.70276	0.689	0.139	0	STYX	Tro_B5
0	2.69944	0.855	0.369	0	ENSBTAG00000049842	Tro_B5
0	2.69678	0.722	0.13	0	FSD1L	Tro_B5
0	2.69308	0.676	0.164	0	ZC3H13	Tro_B5
0	2.68956	0.667	0.17	0	KIF3A	Tro_B5
0	2.68494	0.733	0.223	0	CLN8	Tro_B5
0	2.68043	0.645	0.153	0	RHOBTB2	Tro_B5
0	2.67857	0.676	0.337	0	WIPF1	Tro_B5
0	2.67459	0.965	0.538	0	PICALM	Tro_B5
0	2.66916	0.503	0.136	0	CLIP2	Tro_B5
0	2.66714	0.884	0.317	0	MINDY2	Tro_B5
0	2.66564	0.693	0.216	0	ATP11A	Tro_B5
0	2.66541	0.555	0.199	0	TGFBR1	Tro_B5
0	2.66186	0.826	0.371	0	PARVA	Tro_B5
0	2.65526	0.847	0.303	0	ENSBTAG00000048402	Tro_B5
0	2.65332	0.635	0.178	0	SOD2	Tro_B5
0	2.64889	0.953	0.479	0	RTN4	Tro_B5
0	2.64681	0.552	0.11	0	FBXO30	Tro_B5
0	2.64644	0.943	0.588	0	EGFR	Tro_B5
0	2.64358	0.808	0.277	0	RACGAP1	Tro_B5
0	2.64284	0.918	0.461	0	CBL	Tro_B5
0	2.64232	0.679	0.163	0	TRAF4	Tro_B5
0	2.61872	0.591	0.186	0	ITPR2	Tro_B5
0	2.61379	0.632	0.15	0	NEDD1	Tro_B5
0	2.60868	0.795	0.42	0	TFDP2	Tro_B5
0	2.60763	0.969	0.596	0	EPAS1	Tro_B5
0	2.59989	0.677	0.149	0	USP30	Tro_B5
0	2.59526	0.556	0.138	0	FAM118A	Tro_B5
0	2.58417	0.745	0.35	0	SKP2	Tro_B5
0	2.58281	0.812	0.177	0	BCL2A1	Tro_B5
0	2.57861	0.86	0.317	0	ATP13A3	Tro_B5
0	2.57103	0.891	0.371	0	RAP1A	Tro_B5
0	2.56488	0.877	0.201	0	IGFBP3	Tro_B5
0	2.56042	0.953	0.535	0	ASRGL1	Tro_B5
0	2.5428	0.921	0.438	0	BPTF	Tro_B5
0	2.537	0.781	0.299	0	NECTIN3	Tro_B5
0	2.5338	0.791	0.225	0	RANBP9	Tro_B5
0	2.53363	0.827	0.319	0	PIAS2	Tro_B5
0	2.52121	0.561	0.123	0	GAR1	Tro_B5
0	2.51624	0.864	0.483	0	EIF5B	Tro_B5
0	2.5141	0.564	0.119	0	SLC25A37	Tro_B5
0	2.5113	0.678	0.241	0	LCORL	Tro_B5
0	2.50118	0.517	0.141	0	RB1	Tro_B5
0	2.49267	0.864	0.321	0	PDSS2	Tro_B5
0	2.48847	0.673	0.16	0	LAMA5	Tro_B5
0	2.48836	0.698	0.355	0	CPEB4	Tro_B5
0	2.47879	0.843	0.345	0	RIF1	Tro_B5
0	2.47716	0.673	0.214	0	BCAS2	Tro_B5
0	2.47319	0.929	0.518	0	DIP2B	Tro_B5
0	2.4696	0.55	0.098	0	DNAJC14	Tro_B5
0	2.46858	0.643	0.147	0	INVS	Tro_B5
0	2.45248	0.839	0.356	0	BAZ1B	Tro_B5
0	2.45206	0.65	0.177	0	SDE2	Tro_B5
0	2.45167	0.599	0.125	0	URGCP	Tro_B5
0	2.44173	0.861	0.329	0	CASP6	Tro_B5
0	2.43974	0.533	0.156	0	GCSH	Tro_B5
0	2.43497	0.517	0.133	0	PLA2G12A	Tro_B5
0	2.43336	0.507	0.084	0	NUMA1	Tro_B5
0	2.42906	0.743	0.368	0	STIM2	Tro_B5
0	2.42046	0.778	0.25	0	UBFD1	Tro_B5
0	2.41692	0.594	0.131	0	THAP3	Tro_B5
0	2.41208	0.873	0.354	0	DCAF5	Tro_B5
0	2.39274	0.878	0.317	0	MYO9B	Tro_B5
0	2.39048	0.583	0.144	0	ARHGAP19	Tro_B5
0	2.38871	0.537	0.135	0	SCAMP1	Tro_B5
0	2.38045	0.631	0.193	0	RTN4IP1	Tro_B5
0	2.3798	0.892	0.552	0	TKT	Tro_B5
0	2.36553	0.859	0.383	0	PDCD6IP	Tro_B5
0	2.361	0.801	0.287	0	HDGF	Tro_B5
0	2.3595	0.864	0.441	0	DAPK1	Tro_B5
0	2.35879	0.892	0.499	0	MAN2A1	Tro_B5
0	2.35351	0.57	0.105	0	TRAK1	Tro_B5
0	2.34541	0.912	0.405	0	PPP2R5E	Tro_B5
0	2.32792	0.713	0.19	0	CDCA2	Tro_B5
0	2.31882	0.884	0.403	0	UBE2H	Tro_B5
0	2.31774	0.764	0.271	0	SECISBP2L	Tro_B5
0	2.29279	0.705	0.192	0	SP1	Tro_B5
0	2.29109	0.978	0.54	0	BRWD1	Tro_B5
0	2.29054	0.762	0.183	0	PLPP3	Tro_B5
0	2.2903	0.867	0.311	0	PAIP2	Tro_B5
0	2.28601	0.647	0.163	0	BCAS4	Tro_B5
0	2.27511	0.657	0.149	0	SUN1	Tro_B5
0	2.26855	0.509	0.096	0	IL17D	Tro_B5
0	2.26768	0.907	0.392	0	CNOT2	Tro_B5
0	2.26526	0.962	0.582	0	MYO1E	Tro_B5
0	2.26005	0.66	0.235	0	C1GALT1	Tro_B5
0	2.25748	0.771	0.267	0	SGO2	Tro_B5
0	2.24641	0.801	0.289	0	MRPS14	Tro_B5
0	2.24534	0.511	0.189	0	TMA16	Tro_B5
0	2.24392	0.616	0.153	0	GRAMD2A	Tro_B5
0	2.24245	0.694	0.191	0	FBXO34	Tro_B5
0	2.24003	0.776	0.271	0	SZRD1	Tro_B5
0	2.23758	0.808	0.333	0	RNF121	Tro_B5
0	2.2338	0.627	0.193	0	SLC25A30	Tro_B5
0	2.23276	0.769	0.246	0	MAPK8	Tro_B5
0	2.23237	0.669	0.292	0	ARMC10	Tro_B5
0	2.21587	0.749	0.294	0	SFXN1	Tro_B5
0	2.20946	0.901	0.413	0	ATP1A1	Tro_B5
0	2.20828	0.777	0.393	0	NAA15	Tro_B5
0	2.20335	0.505	0.189	0	PPIL4	Tro_B5
0	2.20201	0.827	0.342	0	FAF2	Tro_B5
0	2.19833	0.755	0.309	0	PCF11	Tro_B5
0	2.19491	0.884	0.358	0	RANBP2	Tro_B5
0	2.1897	0.617	0.202	0	CMIP	Tro_B5
0	2.18842	0.879	0.383	0	BTF3L4	Tro_B5
0	2.18822	0.812	0.269	0	GADD45A	Tro_B5
0	2.1874	0.555	0.114	0	ADGRG1	Tro_B5
0	2.18447	0.988	0.68	0	MYO1D	Tro_B5
0	2.18017	0.901	0.516	0	CD2AP	Tro_B5
0	2.17975	0.638	0.126	0	ARHGEF38	Tro_B5
0	2.17813	0.89	0.458	0	FXR1	Tro_B5
0	2.17399	0.745	0.264	0	KDM3A	Tro_B5
0	2.15851	0.866	0.369	0	LARP1	Tro_B5
0	2.15461	0.649	0.25	0	ATF1	Tro_B5
0	2.14907	0.801	0.333	0	ATF7	Tro_B5
0	2.14872	0.591	0.152	0	TM2D3	Tro_B5
0	2.13004	0.673	0.205	0	PAXX	Tro_B5
0	2.12005	0.565	0.15	0	GOLGA1	Tro_B5
0	2.11846	0.523	0.2	0	PIK3C2A	Tro_B5
0	2.11508	0.863	0.42	0	ECPAS	Tro_B5
0	2.10933	0.902	0.447	0	UBR4	Tro_B5
0	2.10117	0.883	0.539	0	USP34	Tro_B5
0	2.09845	0.658	0.249	0	PRC1	Tro_B5
0	2.0875	0.609	0.189	0	NUFIP2	Tro_B5
0	2.06877	0.517	0.224	0	SGK1	Tro_B5
0	2.06612	0.734	0.222	0	PHAX	Tro_B5
0	2.05542	0.884	0.41	0	MOB1B	Tro_B5
0	2.05309	0.514	0.109	0	HSPG2	Tro_B5
0	2.0396	0.71	0.255	0	ECT2	Tro_B5
0	2.03592	0.837	0.395	0	RAPGEF6	Tro_B5
0	2.01726	0.848	0.32	0	WSB1	Tro_B5
0	2.01169	0.883	0.481	0	PAK1	Tro_B5
0	2.01083	0.646	0.241	0	PPM1D	Tro_B5
0	2.0036	0.906	0.468	0	CLIC4	Tro_B5
0	2.00332	0.951	0.582	0	ZMYND8	Tro_B5
0	2.0002	0.55	0.175	0	IER5L	Tro_B5
0	1.99301	0.827	0.323	0	RRM1	Tro_B5
0	1.99218	0.818	0.222	0	CLDN3	Tro_B5
0	1.98004	0.764	0.26	0	RNF146	Tro_B5
0	1.97841	0.79	0.357	0	SMG7	Tro_B5
1.97697e-298	1.97634	0.685	0.388	3.83531e-294	USP32	Tro_B5
0	1.97528	0.522	0.174	0	CARF	Tro_B5
0	1.96831	0.563	0.177	0	TRNAU1AP	Tro_B5
0	1.95847	0.773	0.242	0	FBXO42	Tro_B5
0	1.9579	0.857	0.439	0	CUL3	Tro_B5
0	1.9497	0.617	0.178	0	SLC25A40	Tro_B5
0	1.94937	0.829	0.424	0	SEPTIN9	Tro_B5
0	1.94822	0.926	0.461	0	GGTA1	Tro_B5
0	1.94577	0.613	0.168	0	CCS	Tro_B5
0	1.94091	0.561	0.145	0	PREB	Tro_B5
0	1.93774	0.651	0.19	0	ULK4	Tro_B5
0	1.93742	0.604	0.165	0	SEMA4B	Tro_B5
0	1.92814	0.886	0.453	0	METAP2	Tro_B5
0	1.92445	0.628	0.212	0	MSH2	Tro_B5
0	1.92146	0.766	0.36	0	B3GNT2	Tro_B5
0	1.92099	0.607	0.202	0	GABPB1	Tro_B5
0	1.91581	0.589	0.19	0	GCNT3	Tro_B5
4.33728e-272	1.90495	0.507	0.224	8.41433e-268	MYO5B	Tro_B5
0	1.89834	0.66	0.175	0	PLIN2	Tro_B5
0	1.89551	0.599	0.128	0	HEXIM2	Tro_B5
0	1.88909	0.567	0.156	0	ZNF217	Tro_B5
0	1.8859	0.654	0.232	0	AP3S1	Tro_B5
0	1.88477	0.75	0.261	0	ARSL	Tro_B5
3.19108e-291	1.87918	0.552	0.247	6.1907e-287	PTEN	Tro_B5
0	1.87786	0.719	0.295	0	NRDC	Tro_B5
0	1.87067	0.799	0.316	0	GPD1L	Tro_B5
0	1.86778	0.517	0.116	0	DICER1	Tro_B5
0	1.8669	0.973	0.593	0	SBF2	Tro_B5
0	1.85904	0.6	0.152	0	FOXO1	Tro_B5
0	1.85805	0.879	0.5	0	OSBPL1A	Tro_B5
0	1.85711	0.573	0.191	0	PAFAH1B2	Tro_B5
0	1.85647	0.823	0.402	0	TRA2A	Tro_B5
0	1.85566	0.542	0.104	0	DKK1	Tro_B5
0	1.84882	0.731	0.314	0	DYNC1LI1	Tro_B5
0	1.84878	0.685	0.261	0	PEAK1	Tro_B5
0	1.84691	0.509	0.131	0	CSNK1E	Tro_B5
0	1.84647	0.61	0.271	0	ANK3	Tro_B5
0	1.84635	0.603	0.191	0	MVB12A	Tro_B5
0	1.83881	0.875	0.39	0	VPS13D	Tro_B5
0	1.83179	0.627	0.234	0	DHX32	Tro_B5
0	1.83121	0.523	0.206	0	CTNNAL1	Tro_B5
0	1.82836	0.545	0.136	0	TM4SF1	Tro_B5
0	1.80704	0.875	0.455	0	NSD1	Tro_B5
1.41423e-273	1.80396	0.734	0.424	2.7436e-269	LAMC1	Tro_B5
0	1.79876	0.515	0.193	0	ANKRD26	Tro_B5
0	1.79849	0.694	0.285	0	OTUD7B	Tro_B5
0	1.79688	0.863	0.468	0	TMEM50B	Tro_B5
0	1.79504	0.812	0.483	0	VMP1	Tro_B5
0	1.79211	0.605	0.19	0	TSPAN13	Tro_B5
0	1.78085	0.747	0.369	0	UBQLN1	Tro_B5
0	1.77728	0.795	0.303	0	USP12	Tro_B5
0	1.76891	0.614	0.193	0	CTDSPL2	Tro_B5
0	1.76668	0.711	0.326	0	RNF111	Tro_B5
0	1.766	0.855	0.437	0	CERT1	Tro_B5
2.31577e-301	1.76437	0.519	0.223	4.49259e-297	ZNF655	Tro_B5
0	1.76035	0.738	0.305	0	AHCTF1	Tro_B5
0	1.75485	0.723	0.359	0	NCKAP1	Tro_B5
0	1.75353	0.708	0.307	0	MAPK9	Tro_B5
0	1.74774	0.772	0.391	0	PPIP5K2	Tro_B5
0	1.74655	0.948	0.702	0	CLTC	Tro_B5
1.88054e-248	1.7287	0.581	0.304	3.64824e-244	IGF2BP1	Tro_B5
0	1.72855	0.54	0.183	0	PHF10	Tro_B5
0	1.72355	0.83	0.504	0	TPD52	Tro_B5
0	1.72152	0.659	0.267	0	SELENOT	Tro_B5
4.18808e-251	1.72075	0.703	0.475	8.12488e-247	DENND1B	Tro_B5
0	1.71908	0.877	0.368	0	TANC2	Tro_B5
0	1.70445	0.602	0.254	0	RBM27	Tro_B5
0	1.69995	0.805	0.465	0	CAB39	Tro_B5
2.41744e-34	1.69714	0.676	0.519	4.68983e-30	FMNL2	Tro_B5
0	1.69216	0.526	0.17	0	TRIM6	Tro_B5
0	1.6831	0.741	0.354	0	SLC2A1	Tro_B5
0	1.68256	0.813	0.378	0	PSAP	Tro_B5
0	1.67345	0.66	0.228	0	KLHDC2	Tro_B5
0	1.6646	0.738	0.431	0	CD24	Tro_B5
0	1.6587	0.593	0.222	0	LIMS1	Tro_B5
0	1.65389	0.813	0.377	0	PALLD	Tro_B5
0	1.64243	0.58	0.199	0	ATAD1	Tro_B5
0	1.64072	0.821	0.347	0	UBE3C	Tro_B5
0	1.63928	0.81	0.453	0	ATRX	Tro_B5
0	1.6375	0.698	0.252	0	ACOT7	Tro_B5
0	1.63672	0.633	0.196	0	RPRD1A	Tro_B5
2.00522e-262	1.63338	0.511	0.23	3.89013e-258	MTCH1	Tro_B5
0	1.61848	0.592	0.245	0	FAM193A	Tro_B5
0	1.61648	0.855	0.523	0	ANKRD17	Tro_B5
0	1.60567	0.676	0.306	0	OSBPL8	Tro_B5
2.18805e-132	1.59477	0.625	0.411	4.24481e-128	ARHGAP32	Tro_B5
0	1.57205	0.564	0.185	0	FAM20C	Tro_B5
0	1.56651	0.781	0.291	0	SNX29	Tro_B5
1.95085e-197	1.55867	0.742	0.477	3.78464e-193	ADD3	Tro_B5
0	1.55657	0.809	0.37	0	ANXA11	Tro_B5
0	1.55255	0.674	0.256	0	CLTB	Tro_B5
0	1.54481	0.64	0.226	0	MRPS10	Tro_B5
0	1.5421	0.827	0.529	0	KANSL1	Tro_B5
0	1.52596	0.905	0.608	0	HMGN1	Tro_B5
0	1.51789	0.68	0.323	0	SNX4	Tro_B5
0	1.51464	0.852	0.554	0	DLG1	Tro_B5
1.05172e-189	1.50832	0.52	0.274	2.04033e-185	POU2F1	Tro_B5
0	1.50629	0.556	0.198	0	RNF11	Tro_B5
0	1.49105	0.546	0.103	0	MAPRE2	Tro_B5
0	1.48499	0.635	0.258	0	PELI1	Tro_B5
0	1.48253	0.698	0.36	0	ATF7IP	Tro_B5
0	1.47978	0.672	0.339	0	LARS1	Tro_B5
0	1.47712	0.895	0.659	0	CTNNA1	Tro_B5
0	1.47555	0.529	0.163	0	IKBKB	Tro_B5
0	1.46484	0.6	0.249	0	EDEM1	Tro_B5
0	1.46273	0.896	0.584	0	YBX1	Tro_B5
1.50494e-42	1.45998	0.64	0.509	2.91959e-38	MYO1B	Tro_B5
7.78928e-141	1.45698	0.575	0.361	1.51112e-136	DAG1	Tro_B5
0	1.44824	0.631	0.247	0	EHMT1	Tro_B5
3.52132e-239	1.44137	0.613	0.303	6.83137e-235	ESYT2	Tro_B5
9.41704e-302	1.43167	0.611	0.283	1.82691e-297	SPIDR	Tro_B5
0	1.42597	0.81	0.547	0	TJP2	Tro_B5
0	1.42564	0.521	0.193	0	KCTD9	Tro_B5
0	1.42273	0.596	0.177	0	ADA	Tro_B5
0	1.41788	0.625	0.265	0	BMPR1B	Tro_B5
8.792e-197	1.41778	0.699	0.438	1.70565e-192	ARFGEF1	Tro_B5
6.15788e-102	1.4131	0.533	0.315	1.19463e-97	EXT1	Tro_B5
0	1.40763	0.531	0.176	0	ISY1	Tro_B5
0	1.40165	0.687	0.288	0	CPD	Tro_B5
0	1.4014	0.672	0.268	0	CKAP2	Tro_B5
3.09927e-123	1.40035	0.544	0.341	6.01258e-119	GTF2B	Tro_B5
0	1.39931	0.884	0.532	0	SLC2A3	Tro_B5
0	1.39731	0.55	0.196	0	ZFYVE16	Tro_B5
0	1.39137	0.74	0.345	0	F11R	Tro_B5
0	1.3902	0.892	0.442	0	MFGE8	Tro_B5
0	1.38581	0.687	0.292	0	EXOC2	Tro_B5
0	1.37765	0.632	0.232	0	CCDC50	Tro_B5
0	1.36778	0.741	0.337	0	TMEM131	Tro_B5
0	1.3665	0.512	0.18	0	LMNB1	Tro_B5
0	1.36644	0.826	0.445	0	PPP6R3	Tro_B5
0	1.36471	0.814	0.432	0	DOCK5	Tro_B5
0	1.35028	0.892	0.574	0	FERMT2	Tro_B5
0	1.34931	0.715	0.306	0	SDCBP	Tro_B5
2.06487e-198	1.34308	0.631	0.335	4.00585e-194	RHOBTB3	Tro_B5
1.10853e-238	1.34127	0.58	0.283	2.15055e-234	MCL1	Tro_B5
0	1.33932	0.632	0.26	0	BFAR	Tro_B5
3.22534e-254	1.33678	0.642	0.341	6.25717e-250	TNPO1	Tro_B5
4.88032e-296	1.33009	0.785	0.445	9.46782e-292	CDK13	Tro_B5
2.01937e-173	1.32597	0.526	0.29	3.91757e-169	SMARCAD1	Tro_B5
0	1.31715	0.896	0.532	0	ADAM10	Tro_B5
0	1.31094	0.565	0.235	0	GOLM2	Tro_B5
1.03526e-211	1.30057	0.627	0.336	2.00841e-207	SHANK2	Tro_B5
0	1.29331	0.559	0.212	0	TXNDC9	Tro_B5
0	1.29032	0.566	0.208	0	SGPP1	Tro_B5
0	1.28934	0.794	0.293	0	SVIL	Tro_B5
0	1.28335	0.647	0.228	0	TMEM245	Tro_B5
2.06905e-245	1.28029	0.539	0.244	4.01396e-241	GPCPD1	Tro_B5
0	1.28011	0.53	0.213	0	CENPE	Tro_B5
1.72884e-128	1.25999	0.631	0.404	3.35395e-124	PPFIA1	Tro_B5
1.86492e-305	1.25971	0.748	0.395	3.61794e-301	ARHGAP21	Tro_B5
0	1.2587	0.864	0.514	0	H3-3A	Tro_B5
2.94287e-224	1.25824	0.64	0.343	5.70916e-220	APC	Tro_B5
0	1.25476	0.665	0.303	0	ADD1	Tro_B5
0	1.25404	0.87	0.212	0	NPPC	Tro_B5
6.78812e-277	1.25386	0.523	0.223	1.3169e-272	CYP20A1	Tro_B5
2.53076e-165	1.25325	0.656	0.395	4.90968e-161	SRGAP1	Tro_B5
1.04612e-186	1.24343	0.502	0.255	2.02947e-182	SHLD1	Tro_B5
0	1.24267	0.826	0.404	0	CACYBP	Tro_B5
0	1.20771	0.888	0.516	0	PAWR	Tro_B5
0	1.20561	0.745	0.385	0	PALS1	Tro_B5
0	1.20143	0.801	0.397	0	XPO1	Tro_B5
0	1.18848	0.532	0.215	0	PPA2	Tro_B5
1.09305e-277	1.18803	0.812	0.494	2.12053e-273	SRRM1	Tro_B5
0	1.18769	0.59	0.225	0	NUP85	Tro_B5
2.09092e-237	1.18751	0.533	0.255	4.05639e-233	HAT1	Tro_B5
3.10375e-45	1.18605	0.613	0.503	6.02127e-41	SLMAP	Tro_B5
1.00302e-231	1.16983	0.574	0.285	1.94586e-227	ALDH7A1	Tro_B5
1.07887e-234	1.16927	0.516	0.241	2.09301e-230	DGUOK	Tro_B5
1.06268e-241	1.16441	0.563	0.263	2.0616e-237	GK5	Tro_B5
3.2268e-118	1.14107	0.503	0.296	6.25999e-114	FAM172A	Tro_B5
0	1.14078	0.957	0.665	0	LGALS3	Tro_B5
3.74767e-150	1.13964	0.62	0.335	7.27048e-146	LCP1	Tro_B5
1.0981e-208	1.13329	0.577	0.307	2.13031e-204	CRTC3	Tro_B5
1.42253e-78	1.12788	0.852	0.712	2.75971e-74	PIP4K2A	Tro_B5
1.18172e-129	1.12057	0.597	0.37	2.29253e-125	CYFIP1	Tro_B5
0	1.11309	0.874	0.509	0	SOD1	Tro_B5
2.1309e-201	1.11173	0.637	0.337	4.13394e-197	RBMS1	Tro_B5
1.23035e-294	1.10978	0.586	0.258	2.38688e-290	PPP2CB	Tro_B5
3.75407e-117	1.10689	0.601	0.407	7.2829e-113	SLTM	Tro_B5
1.43313e-212	1.10454	0.816	0.501	2.78027e-208	EXOC4	Tro_B5
9.67577e-263	1.06712	0.675	0.344	1.8771e-258	PRIM2	Tro_B5
1.32002e-155	1.06408	0.63	0.361	2.56084e-151	PPP4R2	Tro_B5
0	1.06004	0.647	0.301	0	FKBP1A	Tro_B5
4.41489e-161	1.0527	0.708	0.437	8.56488e-157	UBE2D2	Tro_B5
0	1.05086	0.736	0.366	0	ANKIB1	Tro_B5
0	1.04212	0.689	0.316	0	EYA3	Tro_B5
0	1.04194	0.725	0.333	0	COMMD7	Tro_B5
7.54294e-198	1.04191	0.661	0.375	1.46333e-193	VAPA	Tro_B5
1.63054e-249	1.04152	0.564	0.254	3.16325e-245	PBX3	Tro_B5
7.44407e-264	1.03854	0.628	0.309	1.44415e-259	CPSF6	Tro_B5
0	1.03538	0.72	0.3	0	MAST2	Tro_B5
8.24347e-120	1.02834	0.682	0.474	1.59923e-115	SMCHD1	Tro_B5
0	1.02064	0.734	0.365	0	ENSBTAG00000051457	Tro_B5
3.07073e-123	1.00983	0.53	0.305	5.95721e-119	RNF13	Tro_B5
1.07772e-293	1.00568	0.644	0.296	2.09077e-289	RPRD2	Tro_B5
3.79847e-199	0.996669	0.738	0.476	7.36904e-195	SARNP	Tro_B5
0	0.993702	0.526	0.178	0	TEC	Tro_B5
5.3128e-120	0.983673	0.571	0.356	1.03068e-115	TUT4	Tro_B5
2.52707e-212	0.979218	0.583	0.293	4.90252e-208	CLYBL	Tro_B5
0	0.958382	0.526	0.192	0	MSI2	Tro_B5
1.12934e-128	0.956576	0.75	0.551	2.19092e-124	UBE2K	Tro_B5
9.32451e-277	0.937482	0.796	0.43	1.80896e-272	RASAL2	Tro_B5
1.05938e-216	0.91954	0.714	0.405	2.0552e-212	SIPA1L1	Tro_B5
1.22512e-243	0.896824	0.533	0.24	2.37672e-239	CSNK2A2	Tro_B5
1.00913e-264	0.884047	0.591	0.264	1.95771e-260	CSNK1D	Tro_B5
2.15009e-191	0.88252	0.661	0.346	4.17118e-187	SLC39A4	Tro_B5
5.37676e-123	0.875762	0.636	0.388	1.04309e-118	RAP2C	Tro_B5
0	0.863542	0.864	0.232	0	ENSBTAG00000049906	Tro_B5
1.39836e-191	0.84029	0.729	0.434	2.71282e-187	KIDINS220	Tro_B5
2.31695e-269	0.836419	0.602	0.269	4.49489e-265	CD164	Tro_B5
1.01305e-124	0.836167	0.735	0.49	1.96532e-120	UBASH3B	Tro_B5
4.63776e-241	0.820932	0.562	0.255	8.99726e-237	LIN9	Tro_B5
0	0.814267	0.957	0.802	0	EZR	Tro_B5
4.45219e-146	0.791136	0.606	0.357	8.63724e-142	ZCCHC17	Tro_B5
6.57354e-218	0.788758	0.849	0.563	1.27527e-213	PAPOLA	Tro_B5
2.13066e-208	0.785409	0.602	0.305	4.13349e-204	ZNF410	Tro_B5
2.38233e-120	0.770378	0.787	0.528	4.62171e-116	SRSF5	Tro_B5
8.36114e-150	0.767675	0.59	0.318	1.62206e-145	CD151	Tro_B5
0	0.76481	0.884	0.588	0	PACSIN2	Tro_B5
6.40221e-130	0.76229	0.643	0.39	1.24203e-125	TM9SF2	Tro_B5
2.85569e-232	0.750036	0.85	0.532	5.54004e-228	HNRNPK	Tro_B5
5.08869e-98	0.734852	0.541	0.335	9.87206e-94	CKAP5	Tro_B5
7.42614e-258	0.72607	0.731	0.358	1.44067e-253	SERP1	Tro_B5
1.94671e-118	0.72099	0.722	0.493	3.77662e-114	EPB41L4A	Tro_B5
0	0.71223	0.659	0.138	0	ENSBTAG00000053511	Tro_B5
0	0.709124	0.527	0.146	0	SERPINB9	Tro_B5
6.44628e-174	0.707806	0.546	0.279	1.25058e-169	UBA2	Tro_B5
1.18762e-133	0.706125	0.729	0.479	2.30397e-129	RAB2A	Tro_B5
1.14206e-174	0.692428	0.693	0.39	2.21559e-170	NBEAL1	Tro_B5
1.53136e-06	0.690337	0.619	0.548	0.0297084	EXOC6B	Tro_B5
7.97861e-189	0.676061	0.576	0.277	1.54785e-184	STX6	Tro_B5
1.03269e-136	0.672552	0.716	0.447	2.00341e-132	ACACA	Tro_B5
6.36279e-156	0.672494	0.535	0.273	1.23438e-151	FER	Tro_B5
9.04359e-212	0.670508	0.579	0.274	1.75446e-207	CEP83	Tro_B5
8.63795e-123	0.660085	0.515	0.283	1.67576e-118	MAPRE1	Tro_B5
3.78059e-84	0.657724	0.541	0.351	7.33434e-80	MACROH2A1	Tro_B5
7.21704e-143	0.649639	0.695	0.399	1.40011e-138	NEK7	Tro_B5
2.07741e-307	0.647806	0.993	0.881	4.03017e-303	PABPC1	Tro_B5
1.05077e-168	0.627148	0.671	0.37	2.03848e-164	FNBP4	Tro_B5
9.01561e-136	0.617842	0.531	0.279	1.74903e-131	AUH	Tro_B5
6.38483e-19	0.608748	0.65	0.509	1.23866e-14	EML4	Tro_B5
8.67027e-124	0.597431	0.659	0.417	1.68203e-119	NUDT3	Tro_B5
9.41964e-48	0.578122	0.863	0.626	1.82741e-43	SON	Tro_B5
1.31708e-85	0.577213	0.731	0.496	2.55514e-81	BTBD9	Tro_B5
3.66591e-78	0.565062	0.691	0.462	7.11187e-74	TBC1D5	Tro_B5
3.82006e-103	0.560084	0.555	0.333	7.41092e-99	UIMC1	Tro_B5
7.59201e-74	0.558726	0.728	0.59	1.47285e-69	TCF7L1	Tro_B5
9.23429e-132	0.554437	0.829	0.536	1.79145e-127	NIPBL	Tro_B5
8.59335e-74	0.549995	0.655	0.44	1.66711e-69	MGA	Tro_B5
1.24035e-114	0.547959	0.515	0.282	2.40627e-110	LNX2	Tro_B5
6.25949e-122	0.545358	0.569	0.307	1.21434e-117	FOXP1	Tro_B5
1.02537e-18	0.533932	0.576	0.46	1.98922e-14	ITGA6	Tro_B5
1.6278e-94	0.531459	0.581	0.364	3.15794e-90	QKI	Tro_B5
1.0365e-38	0.52815	0.523	0.391	2.0108e-34	PBRM1	Tro_B5
7.11093e-130	0.500402	0.622	0.353	1.37952e-125	MARK2	Tro_B5
0	6.43746	0.608	0.02	0	CDKN2A	Tro_B6
0	5.37155	0.699	0.055	0	SECTM1A	Tro_B6
0	5.32376	0.889	0.133	0	GJB2	Tro_B6
0	5.25195	0.865	0.097	0	FZD4	Tro_B6
0	5.03905	0.706	0.051	0	CYP4A22	Tro_B6
0	4.42535	0.657	0.133	0	SIKE1	Tro_B6
0	4.4165	0.729	0.054	0	EDNRB	Tro_B6
0	4.22108	0.723	0.142	0	TFRC	Tro_B6
0	4.21863	0.551	0.066	0	MGARP	Tro_B6
0	4.21823	0.773	0.16	0	INSIG1	Tro_B6
0	4.19894	0.852	0.183	0	AQP11	Tro_B6
0	4.11278	0.703	0.131	0	PRSS23	Tro_B6
0	4.11189	0.644	0.149	0	VAV3	Tro_B6
0	4.10045	0.833	0.204	0	CLDN3	Tro_B6
0	3.93255	0.594	0.089	0	CCDC30	Tro_B6
0	3.87241	0.794	0.234	0	MKRN1	Tro_B6
0	3.87237	0.754	0.188	0	IGFBP3	Tro_B6
0	3.85624	0.501	0.042	0	ACKR2	Tro_B6
0	3.79074	0.637	0.123	0	NFIB	Tro_B6
0	3.78938	0.597	0.142	0	SLC5A6	Tro_B6
0	3.67073	0.847	0.221	0	ATP1B1	Tro_B6
0	3.52503	0.508	0.171	0	SOD2	Tro_B6
0	3.51207	0.747	0.244	0	AKIRIN1	Tro_B6
0	3.47782	0.748	0.263	0	RCC2	Tro_B6
0	3.47565	0.729	0.212	0	GRSF1	Tro_B6
0	3.35841	0.582	0.163	0	MKNK2	Tro_B6
0	3.34169	0.538	0.133	0	SORBS2	Tro_B6
0	3.30991	0.759	0.314	0	HMOX2	Tro_B6
0	3.28565	0.572	0.153	0	SSBP2	Tro_B6
0	3.24308	0.867	0.499	0	SOD1	Tro_B6
0	3.21131	0.819	0.222	0	GSR	Tro_B6
0	3.16599	0.913	0.191	0	NPPC	Tro_B6
0	3.1564	0.653	0.227	0	TXNDC12	Tro_B6
0	3.12143	0.532	0.119	0	BRD3	Tro_B6
0	3.06163	0.591	0.171	0	TIPARP	Tro_B6
0	3.05721	0.895	0.525	0	ASRGL1	Tro_B6
0	3.05186	0.603	0.165	0	ADA	Tro_B6
0	2.95194	0.62	0.225	0	TMEM120A	Tro_B6
0	2.94685	0.578	0.249	0	CLTB	Tro_B6
0	2.93779	0.584	0.12	0	FAM107B	Tro_B6
0	2.91574	0.624	0.18	0	NFIA	Tro_B6
0	2.88059	0.561	0.198	0	WDR82	Tro_B6
0	2.87757	0.58	0.212	0	AGPAT5	Tro_B6
0	2.85602	0.567	0.151	0	IFNGR1	Tro_B6
0	2.83721	0.515	0.183	0	MOB1A	Tro_B6
0	2.82474	0.902	0.205	0	PAG17	Tro_B6
0	2.80616	0.688	0.268	0	NDFIP1	Tro_B6
0	2.79957	0.723	0.347	0	SERP1	Tro_B6
0	2.79446	0.524	0.218	0	CLN8	Tro_B6
0	2.76011	0.846	0.431	0	MFGE8	Tro_B6
0	2.75649	0.657	0.279	0	HDGF	Tro_B6
0	2.71072	0.903	0.212	0	ENSBTAG00000049906	Tro_B6
0	2.69832	0.52	0.177	0	ITPR2	Tro_B6
0	2.64321	0.843	0.476	0	GSPT1	Tro_B6
0	2.63522	0.533	0.105	0	PRP6	Tro_B6
0	2.6113	0.535	0.143	0	IGFL1	Tro_B6
0	2.55959	0.773	0.412	0	PABPC4	Tro_B6
0	2.54197	0.58	0.189	0	MTHFD2	Tro_B6
0	2.52861	0.57	0.262	0	CHD9	Tro_B6
0	2.5256	0.837	0.283	0	TIMP2	Tro_B6
0	2.51209	0.624	0.307	0	PAIP2	Tro_B6
0	2.48267	0.622	0.303	0	WDR5	Tro_B6
0	2.43585	0.569	0.222	0	HEATR3	Tro_B6
0	2.42106	0.73	0.372	0	VPS26A	Tro_B6
0	2.38152	0.852	0.544	0	TKT	Tro_B6
0	2.36859	0.517	0.112	0	DNMT3B	Tro_B6
0	2.35667	0.557	0.245	0	PBX3	Tro_B6
0	2.35263	0.619	0.325	0	CASP6	Tro_B6
0	2.33915	0.53	0.239	0	SUPT3H	Tro_B6
0	2.29349	0.547	0.233	0	SEC14L1	Tro_B6
0	2.28414	0.626	0.145	0	MGC157405	Tro_B6
0	2.28118	0.887	0.227	0	PRP1	Tro_B6
0	2.26238	0.529	0.185	0	DHX40	Tro_B6
0	2.25499	0.582	0.285	0	MRPS14	Tro_B6
0	2.25125	0.521	0.174	0	CORO2A	Tro_B6
0	2.23641	0.521	0.173	0	BCL2A1	Tro_B6
0	2.23025	0.5	0.214	0	IGF2R	Tro_B6
0	2.23	0.522	0.203	0	MLLT1	Tro_B6
0	2.22739	0.645	0.124	0	ENSBTAG00000053511	Tro_B6
0	2.19016	0.808	0.507	0	H3-3A	Tro_B6
0	2.16767	0.549	0.288	0	FAM172A	Tro_B6
0	2.15104	0.729	0.39	0	SEC63	Tro_B6
0	2.15024	0.512	0.195	0	WSB2	Tro_B6
0	2.1138	0.616	0.321	0	SERPINB6	Tro_B6
0	2.07278	0.736	0.314	0	NT5E	Tro_B6
0	2.0715	0.699	0.359	0	PTPN11	Tro_B6
0	2.06656	0.928	0.657	0	LGALS3	Tro_B6
0	2.05819	0.745	0.347	0	RBBP8	Tro_B6
0	2.03343	0.544	0.273	0	APP	Tro_B6
0	2.03226	0.565	0.267	0	AIF1	Tro_B6
0	1.98827	0.648	0.392	0	TNRC6A	Tro_B6
0	1.96673	0.847	0.197	0	PAG1.1	Tro_B6
0	1.95984	0.549	0.308	0	EXT1	Tro_B6
0	1.94642	0.641	0.382	0	ARL6IP1	Tro_B6
0	1.91915	0.643	0.168	0	PAG16	Tro_B6
0	1.89834	0.664	0.375	0	EPCAM	Tro_B6
0	1.88263	0.67	0.349	0	EFR3A	Tro_B6
0	1.8801	0.599	0.35	0	DDX3X	Tro_B6
0	1.86882	0.584	0.371	0	PARD6B	Tro_B6
0	1.81998	0.643	0.373	0	PSAP	Tro_B6
0	1.81973	0.504	0.239	0	NR3C1	Tro_B6
0	1.80921	0.766	0.498	0	LGALS1	Tro_B6
0	1.79538	0.831	0.207	0	CSH2	Tro_B6
0	1.7005	0.554	0.321	0	RRM1	Tro_B6
0	1.69803	0.733	0.509	0	NASP	Tro_B6
0	1.69516	0.597	0.387	0	PNISR	Tro_B6
0	1.68848	0.555	0.342	0	SLC39A4	Tro_B6
0	1.6377	0.579	0.355	0	NCKAP1	Tro_B6
0	1.62821	0.585	0.2	0	HPCAL1	Tro_B6
0	1.60496	0.762	0.42	0	CD24	Tro_B6
0	1.59719	0.545	0.254	0	QSER1	Tro_B6
0	1.59088	0.513	0.202	0	TENT4B	Tro_B6
0	1.58661	0.6	0.487	0	WWOX	Tro_B6
0	1.58083	0.526	0.36	0	RANBP2	Tro_B6
0	1.56476	0.554	0.342	0	F11R	Tro_B6
0	1.56462	0.604	0.387	0	LAPTM4A	Tro_B6
0	1.56095	0.7	0.181	0	TGFBR3	Tro_B6
0	1.55442	0.568	0.383	0	BTF3L4	Tro_B6
0	1.54859	0.658	0.336	0	NPTN	Tro_B6
0	1.54232	0.503	0.316	0	STX12	Tro_B6
0	1.53788	0.626	0.363	0	ARHGAP29	Tro_B6
0	1.53587	0.553	0.237	0	ENPP1	Tro_B6
0	1.5346	0.684	0.456	0	FXR1	Tro_B6
2.25738e-18	1.51901	0.598	0.589	4.37932e-14	YBX1	Tro_B6
0	1.51246	0.562	0.381	0	APLP2	Tro_B6
0	1.49237	0.7	0.466	0	ITGB1	Tro_B6
0	1.47948	0.536	0.354	0	SCFD1	Tro_B6
1.47125e-283	1.46494	0.528	0.393	2.85422e-279	DNAJC1	Tro_B6
4.90652e-304	1.46125	0.512	0.352	9.51865e-300	OPHN1	Tro_B6
0	1.45745	0.641	0.36	0	EGLN1	Tro_B6
0	1.45476	0.632	0.381	0	AGFG1	Tro_B6
0	1.41449	0.77	0.4	0	EIF4G3	Tro_B6
0	1.40583	0.543	0.383	0	RBM26	Tro_B6
0	1.36994	0.651	0.435	0	CERT1	Tro_B6
0	1.35506	0.551	0.36	0	DEGS1	Tro_B6
0	1.3482	0.673	0.347	0	GPAT3	Tro_B6
0	1.30686	0.862	0.619	0	CST3	Tro_B6
1.45782e-290	1.30105	0.559	0.419	2.82818e-286	ENSBTAG00000054797	Tro_B6
0	1.27849	0.628	0.347	0	PDS5B	Tro_B6
0	1.25366	0.583	0.368	0	ANXA11	Tro_B6
0	1.24266	0.615	0.413	0	ATP1A1	Tro_B6
0	1.22523	0.615	0.439	0	BPTF	Tro_B6
0	1.21289	0.765	0.661	0	TPM4	Tro_B6
4.41051e-217	1.1972	0.503	0.375	8.5564e-213	RSF1	Tro_B6
0	1.19577	0.559	0.181	0	PAG6	Tro_B6
0	1.18285	0.57	0.404	0	CACYBP	Tro_B6
0	1.12312	0.591	0.435	0	MAP7	Tro_B6
7.26004e-290	1.10582	0.802	0.742	1.40845e-285	ENSBTAG00000051364	Tro_B6
0	1.08039	0.743	0.475	0	GPBP1	Tro_B6
1.28341e-183	1.07732	0.518	0.417	2.48981e-179	KTN1	Tro_B6
1.30593e-215	1.06878	0.514	0.392	2.53351e-211	PPIP5K2	Tro_B6
0	1.0648	0.543	0.351	0	TUT4	Tro_B6
0	1.06467	0.614	0.362	0	MDM2	Tro_B6
4.79939e-208	1.06229	0.538	0.425	9.31082e-204	PSPC1	Tro_B6
4.46329e-235	1.05414	0.507	0.355	8.65877e-231	BRI3	Tro_B6
1.07747e-171	1.04948	0.502	0.388	2.0903e-167	CALM3	Tro_B6
0	1.04861	0.826	0.501	0	FNBP1L	Tro_B6
4.35161e-231	1.04657	0.506	0.358	8.44213e-227	SMG7	Tro_B6
1.25985e-226	1.04405	0.527	0.389	2.44412e-222	PTMS	Tro_B6
0	1.0193	0.52	0.354	0	NCK1	Tro_B6
8.13343e-182	1.01813	0.521	0.406	1.57789e-177	ITFG1	Tro_B6
4.95738e-290	1.0163	0.648	0.519	9.61732e-286	ARID1B	Tro_B6
7.82425e-171	1.01296	0.573	0.497	1.5179e-166	BTBD9	Tro_B6
0	0.984545	0.915	0.882	0	PABPC1	Tro_B6
1.46764e-280	0.983175	0.61	0.482	2.84723e-276	RTN4	Tro_B6
0	0.980452	0.692	0.494	0	STRN3	Tro_B6
5.04117e-256	0.980112	0.573	0.452	9.77988e-252	RRBP1	Tro_B6
2.01099e-192	0.966534	0.547	0.439	3.90131e-188	RPN1	Tro_B6
2.42336e-220	0.962866	0.527	0.396	4.70132e-216	LSM14A	Tro_B6
0	0.945447	0.742	0.608	0	SMAP1	Tro_B6
3.75095e-148	0.934531	0.5	0.408	7.27685e-144	OCIAD1	Tro_B6
4.67447e-222	0.931629	0.574	0.455	9.06848e-218	METAP2	Tro_B6
9.06347e-166	0.919268	0.539	0.456	1.75831e-161	AMD1	Tro_B6
0	0.918598	0.764	0.627	0	SERF2	Tro_B6
2.48352e-215	0.917421	0.52	0.378	4.81802e-211	RYBP	Tro_B6
1.16355e-167	0.906655	0.578	0.466	2.25729e-163	SUMO2	Tro_B6
3.24497e-158	0.903136	0.518	0.411	6.29525e-154	GNAQ	Tro_B6
8.0359e-158	0.902212	0.554	0.453	1.55896e-153	PDS5A	Tro_B6
1.00869e-247	0.899474	0.602	0.463	1.95686e-243	GGTA1	Tro_B6
1.37533e-168	0.898484	0.522	0.409	2.66815e-164	PPP2R5E	Tro_B6
3.92095e-229	0.894641	0.623	0.502	7.60664e-225	ASH1L	Tro_B6
0	0.890291	0.89	0.427	0	S100G	Tro_B6
2.02853e-114	0.884623	0.503	0.439	3.93535e-110	UBE2D2	Tro_B6
7.07681e-295	0.879945	0.655	0.516	1.3729e-290	CD2AP	Tro_B6
3.78628e-185	0.859698	0.624	0.518	7.34538e-181	RBFOX2	Tro_B6
8.63544e-159	0.857764	0.56	0.458	1.67528e-154	ENSBTAG00000053119	Tro_B6
1.60685e-159	0.85705	0.522	0.414	3.1173e-155	MOB1B	Tro_B6
4.51559e-148	0.855541	0.561	0.468	8.76024e-144	NSMCE2	Tro_B6
4.89914e-131	0.849425	0.538	0.448	9.50434e-127	PPP6R3	Tro_B6
3.51822e-142	0.848037	0.533	0.442	6.82534e-138	CUL3	Tro_B6
5.89206e-182	0.841312	0.581	0.479	1.14306e-177	ANXA5	Tro_B6
0	0.839701	0.76	0.704	0	CLTC	Tro_B6
2.98222e-141	0.835339	0.541	0.471	5.7855e-137	GDI2	Tro_B6
0	0.825869	0.5	0.184	0	MSI2	Tro_B6
9.98472e-267	0.821796	0.507	0.348	1.93704e-262	VKORC1L1	Tro_B6
4.8356e-90	0.793777	0.524	0.463	9.38106e-86	RAD51B	Tro_B6
3.12854e-176	0.784444	0.634	0.551	6.06936e-172	SSR3	Tro_B6
2.39277e-97	0.779904	0.535	0.472	4.64197e-93	TMEM50B	Tro_B6
2.81041e-119	0.772703	0.55	0.481	5.4522e-115	NUCKS1	Tro_B6
1.52845e-162	0.769601	0.593	0.509	2.96519e-158	SPINT2	Tro_B6
2.06786e-243	0.765216	0.612	0.441	4.01165e-239	FNIP1	Tro_B6
3.71624e-115	0.761903	0.503	0.409	7.20951e-111	ELOB	Tro_B6
3.11262e-147	0.754235	0.547	0.448	6.03848e-143	CDKAL1	Tro_B6
0	0.74454	0.632	0.081	0	SOBP	Tro_B6
0	0.738449	0.51	0.308	0	ARHGAP17	Tro_B6
8.72681e-87	0.735097	0.516	0.451	1.693e-82	RBM6	Tro_B6
2.82382e-151	0.733673	0.627	0.538	5.4782e-147	NIPBL	Tro_B6
0	0.719799	0.653	0.403	0	MAML2	Tro_B6
3.89639e-108	0.708584	0.547	0.487	7.559e-104	EIF5B	Tro_B6
0	0.705459	0.574	0.357	0	GAPVD1	Tro_B6
7.09944e-101	0.703655	0.593	0.547	1.37729e-96	EXOC6B	Tro_B6
8.017e-80	0.697389	0.516	0.448	1.5553e-75	CDK13	Tro_B6
2.60734e-88	0.689002	0.508	0.432	5.05825e-84	USP47	Tro_B6
0	0.683464	0.661	0.287	0	FAM135A	Tro_B6
2.33995e-144	0.681016	0.62	0.525	4.53951e-140	ANKRD17	Tro_B6
1.06172e-108	0.668174	0.585	0.513	2.05974e-104	ZNF638	Tro_B6
4.54717e-58	0.649566	0.517	0.481	8.82152e-54	NCOR1	Tro_B6
5.94046e-81	0.645235	0.529	0.464	1.15245e-76	WDR33	Tro_B6
3.47818e-81	0.644331	0.508	0.439	6.74767e-77	ARFGEF1	Tro_B6
9.86357e-203	0.641941	0.727	0.61	1.91353e-198	ZFAND3	Tro_B6
4.65246e-68	0.633387	0.516	0.454	9.02578e-64	WAC	Tro_B6
6.62305e-130	0.633068	0.613	0.538	1.28487e-125	DDX17	Tro_B6
2.25808e-70	0.627953	0.536	0.494	4.38068e-66	SFPQ	Tro_B6
3.84397e-75	0.626539	0.569	0.514	7.45731e-71	SENP6	Tro_B6
7.41749e-67	0.601414	0.536	0.51	1.43899e-62	CSDE1	Tro_B6
5.70057e-55	0.582016	0.525	0.476	1.10591e-50	ATXN2	Tro_B6
7.40866e-90	0.571948	0.513	0.428	1.43728e-85	SEPTIN9	Tro_B6
1.20782e-45	0.564731	0.589	0.58	2.34317e-41	REEP5	Tro_B6
4.62212e-48	0.559021	0.508	0.463	8.96691e-44	ZNF609	Tro_B6
1.4876e-212	0.555149	0.694	0.562	2.88595e-208	PAPOLA	Tro_B6
1.75959e-81	0.551919	0.596	0.553	3.41361e-77	UBE2K	Tro_B6
4.12312e-133	0.544518	0.661	0.559	7.99885e-129	COX6C	Tro_B6
4.87641e-61	0.539627	0.5	0.453	9.46024e-57	KCMF1	Tro_B6
9.94742e-43	0.538632	0.522	0.503	1.9298e-38	HUWE1	Tro_B6
1.84178e-50	0.53639	0.523	0.497	3.57306e-46	MATR3	Tro_B6
7.08136e-42	0.528148	0.549	0.526	1.37378e-37	PPP1R12A	Tro_B6
9.97261e-33	0.527013	0.516	0.486	1.93469e-28	TBL1XR1	Tro_B6
1.08008e-55	0.525646	0.536	0.505	2.09535e-51	SMARCC1	Tro_B6
1.47445e-221	0.523376	0.605	0.421	2.86044e-217	LAMC1	Tro_B6
4.71185e-49	0.50077	0.527	0.491	9.14099e-45	ARF1	Tro_B6
0	0.936635	0.525	0.517	0	VCP	IFNT+Tro_1
0	0.54196	0.573	0.492	0	TUBB4B	IFNT+Tro_1
0	1.45462	0.865	0.605	0	TPM4	IFNT+Tro_1
0	0.5466	0.62	0.484	0	TPI1	IFNT+Tro_1
0	1.86814	0.593	0.327	0	TOP2A	IFNT+Tro_1
0	0.871367	0.927	0.63	0	TMSB4X	IFNT+Tro_1
0	0.641043	1	0.978	0	TMSB10	IFNT+Tro_1
0	0.525143	0.785	0.685	0	TMBIM6	IFNT+Tro_1
0	1.75822	0.988	0.24	0	TKDP4	IFNT+Tro_1
0	2.90917	0.993	0.336	0	TKDP1	IFNT+Tro_1
0	0.681639	0.533	0.543	0	ST13	IFNT+Tro_1
0	1.44235	0.989	0.629	0	SSLP1	IFNT+Tro_1
0	1.14387	0.81	0.353	0	SLC7A4	IFNT+Tro_1
0	1.74708	0.724	0.481	0	SLC2A3	IFNT+Tro_1
0	1.41401	0.548	0.42	0	SGMS1	IFNT+Tro_1
0	0.83056	0.506	0.367	0	SFN	IFNT+Tro_1
0	0.503893	0.569	0.535	0	SELENOP	IFNT+Tro_1
0	2.03336	0.629	0.387	0	SCD	IFNT+Tro_1
0	1.07727	0.832	0.493	0	S100A10	IFNT+Tro_1
0	0.652186	0.883	0.624	0	RPS17	IFNT+Tro_1
0	0.870883	0.778	0.621	0	RPL4	IFNT+Tro_1
0	0.635613	0.861	0.721	0	RPL23A	IFNT+Tro_1
0	0.511249	0.963	0.716	0	RPL13	IFNT+Tro_1
0	0.785608	0.527	0.482	0	RESF1	IFNT+Tro_1
0	0.838109	0.607	0.617	0	RAP1B	IFNT+Tro_1
0	1.20589	0.697	0.45	0	PTTG1IP	IFNT+Tro_1
0	2.11935	0.851	0.318	0	PTGS2	IFNT+Tro_1
0	1.10692	0.752	0.432	0	PRXL2A	IFNT+Tro_1
0	0.532262	0.974	0.638	0	PRDX1	IFNT+Tro_1
0	2.05294	0.501	0.239	0	PLA2G7	IFNT+Tro_1
0	0.687951	0.73	0.66	0	PKM	IFNT+Tro_1
0	1.30888	0.672	0.261	0	PINLYP	IFNT+Tro_1
0	1.20168	0.614	0.488	0	PDIA3	IFNT+Tro_1
0	1.78754	0.996	0.848	0	PABPC1	IFNT+Tro_1
0	0.527254	0.568	0.563	0	P4HB	IFNT+Tro_1
0	1.96556	0.79	0.35	0	ODC1	IFNT+Tro_1
0	2.86945	0.724	0.278	0	ND6	IFNT+Tro_1
0	1.66581	0.947	0.469	0	ND5	IFNT+Tro_1
0	1.9177	0.999	0.606	0	ND4	IFNT+Tro_1
0	2.15715	0.999	0.595	0	ND3	IFNT+Tro_1
0	1.84039	0.999	0.59	0	ND2	IFNT+Tro_1
0	2.37476	0.999	0.579	0	ND1	IFNT+Tro_1
7.26869e-218	0.637772	0.522	0.568	1.41013e-213	MTDH	IFNT+Tro_1
0	1.80056	0.829	0.429	0	LRP2	IFNT+Tro_1
0	1.85966	0.575	0.393	0	LIMK2	IFNT+Tro_1
0	0.827776	0.998	0.582	0	KRT8	IFNT+Tro_1
0	1.12613	0.997	0.608	0	KRT19	IFNT+Tro_1
0	0.733148	0.514	0.446	0	ITGA6	IFNT+Tro_1
0	2.09099	0.977	0.274	0	IFNT3	IFNT+Tro_1
0	1.50691	0.912	0.193	0	IFNT2	IFNT+Tro_1
0	1.4568	0.969	0.288	0	IFNT	IFNT+Tro_1
0	2.07574	0.61	0.337	0	IDH1	IFNT+Tro_1
0	1.03694	0.945	0.57	0	HSPB1	IFNT+Tro_1
0	0.737014	0.989	0.884	0	HSPA8	IFNT+Tro_1
0	0.540559	0.632	0.513	0	HSPA5	IFNT+Tro_1
0	1.01888	0.794	0.603	0	HSP90B1	IFNT+Tro_1
0	0.745335	0.632	0.644	0	HNRNPM	IFNT+Tro_1
0	0.953606	0.704	0.513	0	HMGCS1	IFNT+Tro_1
0	1.14721	0.594	0.569	0	HDLBP	IFNT+Tro_1
0	1.28925	0.557	0.354	0	HAND1	IFNT+Tro_1
0	1.58917	0.508	0.388	0	GNAQ	IFNT+Tro_1
0	1.01315	0.605	0.405	0	GALM	IFNT+Tro_1
0	1.68513	0.773	0.47	0	FURIN	IFNT+Tro_1
0	1.42012	0.513	0.355	0	FNBP1	IFNT+Tro_1
0	3.50701	0.814	0.211	0	FN1	IFNT+Tro_1
0	3.65306	0.571	0.115	0	FETUB	IFNT+Tro_1
0	3.05994	0.773	0.213	0	FADS1	IFNT+Tro_1
0	1.08005	0.985	0.662	0	FABP5	IFNT+Tro_1
0	0.89863	0.932	0.765	0	EZR	IFNT+Tro_1
0	0.931213	0.776	0.376	0	ENSBTAG00000050611	IFNT+Tro_1
0	0.626609	0.829	0.636	0	ENO1	IFNT+Tro_1
0	0.846065	0.563	0.5	0	ELOVL6	IFNT+Tro_1
0	1.0108	0.783	0.642	0	EEF2	IFNT+Tro_1
0	0.614668	0.872	0.645	0	EEF1G	IFNT+Tro_1
0	0.518906	0.983	0.726	0	EEF1A1	IFNT+Tro_1
0	1.4512	0.982	0.654	0	DSTN	IFNT+Tro_1
0	0.736887	0.724	0.532	0	DBI	IFNT+Tro_1
0	0.939971	0.552	0.438	0	DAB2	IFNT+Tro_1
0	2.42262	1	0.61	0	CYTB	IFNT+Tro_1
6.30277e-26	0.667458	0.423	0.539	1.22274e-21	CSDE1	IFNT+Tro_1
0	2.19872	1	0.708	0	COX3	IFNT+Tro_1
0	1.9543	0.999	0.654	0	COX2	IFNT+Tro_1
0	2.01698	1	0.682	0	COX1	IFNT+Tro_1
0	0.950098	0.751	0.693	0	CLTC	IFNT+Tro_1
0	0.885816	0.51	0.331	0	CLDN6	IFNT+Tro_1
0	1.6013	0.769	0.504	0	CDK14	IFNT+Tro_1
0	1.47735	0.734	0.344	0	CD24	IFNT+Tro_1
0	1.81909	0.657	0.444	0	CARMIL1	IFNT+Tro_1
0	1.466	0.711	0.338	0	CAPG	IFNT+Tro_1
1.4874e-55	0.690874	0.426	0.514	2.88556e-51	CAP1	IFNT+Tro_1
0	0.658539	0.942	0.735	0	CALM1	IFNT+Tro_1
0	3.20388	0.55	0.202	0	BCAR3	IFNT+Tro_1
0	0.796217	0.551	0.44	0	BCAM	IFNT+Tro_1
0	1.62682	0.916	0.432	0	BASP1	IFNT+Tro_1
0	0.817153	0.497	0.518	0	B4GALT1	IFNT+Tro_1
0	2.14811	0.633	0.368	0	ATP8A1	IFNT+Tro_1
0	2.15063	0.999	0.633	0	ATP6	IFNT+Tro_1
0	0.617364	0.638	0.546	0	ATP5F1A	IFNT+Tro_1
0	0.897081	0.541	0.472	0	ARHGDIB	IFNT+Tro_1
0	2.18534	0.593	0.225	0	APOE	IFNT+Tro_1
0	2.30804	0.938	0.366	0	APOA1	IFNT+Tro_1
0	1.14653	0.928	0.745	0	ANXA2	IFNT+Tro_1
0	0.561688	0.567	0.487	0	ANXA1	IFNT+Tro_1
0	0.58902	0.73	0.599	0	ALDOA	IFNT+Tro_1
0	0.737285	0.962	0.663	0	AKR1B1	IFNT+Tro_1
0	4.53264	0.594	0.07	0	AHSG	IFNT+Tro_1
0	1.29841	0.637	0.468	0	AHNAK	IFNT+Tro_1
0	1.31083	0.605	0.292	0	ZYX	IFNT+Tro_2
0	1.52576	1	0.837	0	ZC3H10	IFNT+Tro_2
0	2.7764	0.793	0.254	0	YJEFN3	IFNT+Tro_2
0	1.69382	0.527	0.204	0	WNT6	IFNT+Tro_2
0	1.50116	0.783	0.37	0	WDR83OS	IFNT+Tro_2
0	1.35336	0.771	0.376	0	VSIG10L	IFNT+Tro_2
0	1.5473	0.669	0.323	0	VAMP8	IFNT+Tro_2
0	1.01195	0.84	0.408	0	UQCRQ	IFNT+Tro_2
0	0.927067	0.918	0.551	0	UQCRH	IFNT+Tro_2
0	0.69119	0.585	0.343	0	UQCRFS1	IFNT+Tro_2
0	1.30468	0.693	0.339	0	UQCRC1	IFNT+Tro_2
0	0.750542	0.798	0.452	0	UQCRB	IFNT+Tro_2
0	1.87211	0.962	0.477	0	UQCR11	IFNT+Tro_2
0	1.45145	0.927	0.466	0	UQCR10	IFNT+Tro_2
0	1.28003	0.522	0.24	0	UQCC2	IFNT+Tro_2
0	0.916518	0.508	0.3	0	UFC1	IFNT+Tro_2
0	1.50643	0.785	0.367	0	UBL5	IFNT+Tro_2
0	1.63536	0.641	0.279	0	UBL4A	IFNT+Tro_2
0	1.35762	0.841	0.445	0	UBE2S	IFNT+Tro_2
0	0.615363	0.62	0.412	0	UBE2L3	IFNT+Tro_2
0	1.7968	0.567	0.237	0	UBE2G2	IFNT+Tro_2
0	1.27804	1	0.803	0	UBA52	IFNT+Tro_2
0	0.63844	0.879	0.515	0	TXN	IFNT+Tro_2
0	1.16052	0.838	0.479	0	TUBB4B	IFNT+Tro_2
0	1.23432	0.528	0.241	0	TUBA1C	IFNT+Tro_2
0	0.889018	0.938	0.632	0	TUBA1B	IFNT+Tro_2
0	1.44964	0.55	0.192	0	TSPAN1	IFNT+Tro_2
0	0.980045	0.518	0.295	0	TRIR	IFNT+Tro_2
0	1.37229	0.534	0.265	0	TRAPPC5	IFNT+Tro_2
0	0.798172	0.896	0.644	0	TPM4	IFNT+Tro_2
0	1.91599	0.95	0.474	0	TPI1	IFNT+Tro_2
0	0.856703	0.611	0.334	0	TOMM7	IFNT+Tro_2
0	0.895112	0.724	0.373	0	TOMM6	IFNT+Tro_2
0	1.81698	0.989	0.672	0	TMSB4X	IFNT+Tro_2
0	3.31406	0.735	0.158	0	TMSB4	IFNT+Tro_2
0	2.03686	1	0.982	0	TMSB10	IFNT+Tro_2
0	1.72963	0.767	0.351	0	TMEM258	IFNT+Tro_2
0	1.80797	0.656	0.29	0	TMEM256	IFNT+Tro_2
0	1.61996	0.689	0.285	0	TMEM160	IFNT+Tro_2
0	1.33615	0.693	0.315	0	TMEM147	IFNT+Tro_2
0	1.41168	0.559	0.237	0	TMEM125	IFNT+Tro_2
0	0.682592	0.603	0.38	0	TMED9	IFNT+Tro_2
0	1.13055	0.937	0.686	0	TMBIM6	IFNT+Tro_2
0	0.907936	0.636	0.381	0	TMBIM1	IFNT+Tro_2
0	1.15246	0.877	0.497	0	TMA7	IFNT+Tro_2
0	2.19127	0.986	0.361	0	TKDP4	IFNT+Tro_2
0	1.34717	0.997	0.442	0	TKDP1	IFNT+Tro_2
0	0.978908	0.562	0.292	0	TIMM8B	IFNT+Tro_2
0	1.44563	0.515	0.239	0	TIMM17B	IFNT+Tro_2
0	0.890748	0.562	0.283	0	TIMM13	IFNT+Tro_2
0	1.002	0.517	0.261	0	TIMM10	IFNT+Tro_2
0	1.45145	0.684	0.388	0	TECR	IFNT+Tro_2
0	1.10687	0.629	0.264	0	TCAF2	IFNT+Tro_2
0	0.775072	0.718	0.431	0	TALDO1	IFNT+Tro_2
0	0.909791	0.712	0.376	0	TAGLN2	IFNT+Tro_2
0	1.3957	0.636	0.316	0	TAF10	IFNT+Tro_2
0	0.738442	0.513	0.36	0	SURF4	IFNT+Tro_2
0	0.50649	0.712	0.448	0	SUMO2	IFNT+Tro_2
0	0.933616	0.631	0.356	0	STMP1	IFNT+Tro_2
0	1.63036	0.702	0.298	0	STARD10	IFNT+Tro_2
0	1.52388	0.982	0.633	0	SSR4	IFNT+Tro_2
0	0.583539	0.742	0.536	0	SSR3	IFNT+Tro_2
0	1.17358	0.809	0.47	0	SSR2	IFNT+Tro_2
0	1.3159	0.995	0.687	0	SSLP1	IFNT+Tro_2
0	1.21775	0.513	0.21	0	SRM	IFNT+Tro_2
0	1.47965	0.628	0.302	0	SPNS1	IFNT+Tro_2
2.2843e-306	0.506464	0.516	0.342	4.43154e-302	SPCS3	IFNT+Tro_2
0	0.814543	0.509	0.278	0	SNU13	IFNT+Tro_2
0	1.34085	0.803	0.4	0	SNRPG	IFNT+Tro_2
0	1.06872	0.848	0.458	0	SNRPD3	IFNT+Tro_2
0	1.39323	0.833	0.391	0	SNRPD2	IFNT+Tro_2
0	0.594279	0.691	0.407	0	SNRPD1	IFNT+Tro_2
0	0.977244	0.66	0.344	0	SNRPB	IFNT+Tro_2
0	1.38408	0.552	0.259	0	SMDT1	IFNT+Tro_2
0	2.02148	0.934	0.415	0	SLC7A4	IFNT+Tro_2
0	1.11153	0.584	0.329	0	SLC39A4	IFNT+Tro_2
0	0.903595	0.62	0.344	0	SLC39A2	IFNT+Tro_2
0	1.10612	0.623	0.305	0	SLC35G1	IFNT+Tro_2
0	0.999094	0.98	0.641	0	SLC25A6	IFNT+Tro_2
0	0.945565	0.728	0.357	0	SLC25A5	IFNT+Tro_2
0	1.5998	0.854	0.418	0	SH3BGRL3	IFNT+Tro_2
0	1.18558	0.806	0.36	0	SFN	IFNT+Tro_2
0	1.13783	0.558	0.269	0	SF3B5	IFNT+Tro_2
0	1.33743	0.699	0.365	0	SERINC2	IFNT+Tro_2
0	1.60377	0.954	0.602	0	SERF2	IFNT+Tro_2
0	1.45429	0.886	0.472	0	SEM1	IFNT+Tro_2
0	1.19993	0.834	0.461	0	SEC61G	IFNT+Tro_2
0	1.1878	0.909	0.496	0	SEC61B	IFNT+Tro_2
0	0.845886	0.601	0.389	0	SEC61A1	IFNT+Tro_2
0	1.43886	0.652	0.302	0	SDF2L1	IFNT+Tro_2
0	0.734622	0.585	0.326	0	SAP18	IFNT+Tro_2
0	2.41542	0.923	0.353	0	S100A2	IFNT+Tro_2
0	1.23688	0.773	0.345	0	S100A16	IFNT+Tro_2
0	1.36151	0.95	0.525	0	S100A14	IFNT+Tro_2
0	1.88746	0.921	0.427	0	S100A11	IFNT+Tro_2
0	1.42536	0.968	0.535	0	S100A10	IFNT+Tro_2
0	1.22904	1	0.827	0	RPSA	IFNT+Tro_2
0	1.24264	0.999	0.789	0	RPS9	IFNT+Tro_2
0	0.952098	0.999	0.806	0	RPS8	IFNT+Tro_2
0	1.23216	0.993	0.72	0	RPS7	IFNT+Tro_2
0	0.552978	0.96	0.69	0	RPS6	IFNT+Tro_2
0	1.37451	0.999	0.779	0	RPS5	IFNT+Tro_2
0	0.601971	0.52	0.308	0	RPS4Y1	IFNT+Tro_2
0	0.853652	0.982	0.662	0	RPS4X	IFNT+Tro_2
0	0.687933	0.987	0.741	0	RPS3A	IFNT+Tro_2
0	1.50157	0.994	0.683	0	RPS3	IFNT+Tro_2
0	1.12815	0.999	0.752	0	RPS29	IFNT+Tro_2
0	1.3607	1	0.79	0	RPS28	IFNT+Tro_2
0	0.790551	0.997	0.77	0	RPS27A	IFNT+Tro_2
0	1.36461	0.998	0.732	0	RPS27	IFNT+Tro_2
0	0.993953	0.986	0.649	0	RPS26	IFNT+Tro_2
0	1.09588	0.993	0.709	0	RPS25	IFNT+Tro_2
0	0.658996	0.997	0.84	0	RPS24	IFNT+Tro_2
0	1.0731	0.994	0.699	0	RPS23	IFNT+Tro_2
0	1.30296	0.985	0.651	0	RPS21	IFNT+Tro_2
0	0.998529	0.999	0.778	0	RPS20	IFNT+Tro_2
0	1.23914	1	0.809	0	RPS2	IFNT+Tro_2
0	1.50407	0.626	0.284	0	RPS19BP1	IFNT+Tro_2
0	1.35579	0.999	0.805	0	RPS19	IFNT+Tro_2
0	1.17202	1	0.812	0	RPS18	IFNT+Tro_2
0	1.01436	0.981	0.656	0	RPS17	IFNT+Tro_2
0	1.02507	0.983	0.665	0	RPS16	IFNT+Tro_2
0	1.19314	0.988	0.671	0	RPS15A	IFNT+Tro_2
0	1.46036	0.999	0.729	0	RPS15	IFNT+Tro_2
0	1.23458	1	0.797	0	RPS14	IFNT+Tro_2
0	1.05351	0.993	0.697	0	RPS13	IFNT+Tro_2
0	1.09568	1	0.804	0	RPS12	IFNT+Tro_2
0	1.36447	0.998	0.735	0	RPS11	IFNT+Tro_2
0	1.00434	0.999	0.781	0	RPS10	IFNT+Tro_2
0	1.39835	0.999	0.776	0	RPLP2	IFNT+Tro_2
0	1.14232	1	0.79	0	RPLP1	IFNT+Tro_2
0	1.21896	0.999	0.723	0	RPLP0	IFNT+Tro_2
0	0.642398	0.983	0.685	0	RPL9	IFNT+Tro_2
0	1.39213	0.999	0.747	0	RPL8	IFNT+Tro_2
0	1.23943	0.999	0.776	0	RPL7A	IFNT+Tro_2
0	0.856607	0.985	0.699	0	RPL7	IFNT+Tro_2
0	0.679943	0.987	0.76	0	RPL6	IFNT+Tro_2
0	1.71601	0.995	0.619	0	RPL39	IFNT+Tro_2
0	1.46536	0.995	0.668	0	RPL38	IFNT+Tro_2
0	1.22665	0.996	0.733	0	RPL37A	IFNT+Tro_2
0	0.885356	0.993	0.701	0	RPL37	IFNT+Tro_2
0	0.747097	0.927	0.616	0	RPL36AL	IFNT+Tro_2
0	0.828707	0.913	0.514	0	RPL36A	IFNT+Tro_2
0	1.71737	0.995	0.694	0	RPL36	IFNT+Tro_2
0	0.905744	0.991	0.727	0	RPL35A	IFNT+Tro_2
0	1.62901	0.999	0.728	0	RPL35	IFNT+Tro_2
0	0.93138	0.995	0.723	0	RPL34	IFNT+Tro_2
0	1.36311	0.999	0.753	0	RPL32	IFNT+Tro_2
0	0.806069	0.99	0.696	0	RPL30	IFNT+Tro_2
0	0.901618	0.973	0.667	0	RPL3	IFNT+Tro_2
0	1.47778	0.997	0.688	0	RPL29	IFNT+Tro_2
0	1.63099	0.999	0.724	0	RPL28	IFNT+Tro_2
0	0.842277	0.996	0.78	0	RPL27A	IFNT+Tro_2
0	1.1397	0.99	0.699	0	RPL27	IFNT+Tro_2
0	0.895362	0.981	0.664	0	RPL26	IFNT+Tro_2
0	0.893885	0.995	0.752	0	RPL24	IFNT+Tro_2
0	0.833251	0.964	0.734	0	RPL23A	IFNT+Tro_2
0	0.833275	0.998	0.778	0	RPL23	IFNT+Tro_2
0	1.15186	0.676	0.318	0	RPL22L1	IFNT+Tro_2
0	0.878983	0.975	0.669	0	RPL22	IFNT+Tro_2
0	0.985188	0.981	0.664	0	RPL19	IFNT+Tro_2
0	1.20364	0.998	0.732	0	RPL18A	IFNT+Tro_2
0	1.30147	0.999	0.763	0	RPL18	IFNT+Tro_2
0	1.63558	0.994	0.674	0	RPL15	IFNT+Tro_2
0	1.09885	0.997	0.734	0	RPL14	IFNT+Tro_2
0	1.03193	0.997	0.766	0	RPL13A	IFNT+Tro_2
0	0.909769	0.995	0.753	0	RPL13	IFNT+Tro_2
0	1.38543	0.997	0.677	0	RPL12	IFNT+Tro_2
0	1.19635	0.997	0.827	0	RPL11	IFNT+Tro_2
0	1.00972	0.993	0.741	0	RPL10A	IFNT+Tro_2
0	1.55194	1	0.759	0	RPL10	IFNT+Tro_2
0	1.39445	0.825	0.372	0	ROMO1	IFNT+Tro_2
0	0.633558	0.733	0.483	0	RNH1	IFNT+Tro_2
0	1.33541	0.503	0.243	0	RNF181	IFNT+Tro_2
0	1.29002	0.567	0.247	0	RNASEH2C	IFNT+Tro_2
0	0.514095	0.781	0.581	0	REXO2	IFNT+Tro_2
0	0.78754	0.812	0.558	0	REEP5	IFNT+Tro_2
0	0.905065	0.684	0.415	0	RBX1	IFNT+Tro_2
0	0.595125	0.529	0.318	0	RBM8A	IFNT+Tro_2
0	1.10982	0.544	0.304	0	RBM3	IFNT+Tro_2
0	1.06093	0.984	0.693	0	RACK1	IFNT+Tro_2
0	2.30319	0.62	0.14	0	RAC2	IFNT+Tro_2
0	0.525904	0.894	0.734	0	RAC1	IFNT+Tro_2
0	1.21714	0.794	0.456	0	RABAC1	IFNT+Tro_2
0	0.513793	0.549	0.359	0	RAB5IF	IFNT+Tro_2
0	1.10257	0.551	0.285	0	RAB5C	IFNT+Tro_2
0	1.73743	0.791	0.34	0	RAB25	IFNT+Tro_2
0	0.701478	0.82	0.478	0	PTTG1IP	IFNT+Tro_2
0	1.09101	0.709	0.365	0	PTMS	IFNT+Tro_2
0	0.504841	0.931	0.727	0	PTMA	IFNT+Tro_2
0	0.948067	0.862	0.403	0	PTGS2	IFNT+Tro_2
0	1.54839	0.583	0.26	0	PSMG4	IFNT+Tro_2
0	1.25833	0.63	0.304	0	PSMD8	IFNT+Tro_2
0	0.513029	0.537	0.356	0	PSMC5	IFNT+Tro_2
0	0.886006	0.614	0.349	0	PSMC3	IFNT+Tro_2
0	0.952502	0.615	0.331	0	PSMC1	IFNT+Tro_2
0	1.32931	0.739	0.341	0	PSMB6	IFNT+Tro_2
0	1.27126	0.762	0.363	0	PSMB5	IFNT+Tro_2
0	1.02273	0.688	0.356	0	PSMB4	IFNT+Tro_2
0	1.51044	0.594	0.276	0	PSMB3	IFNT+Tro_2
0	0.833924	0.67	0.388	0	PSMB1	IFNT+Tro_2
0	0.613619	0.797	0.501	0	PSMA7	IFNT+Tro_2
0	0.61327	0.533	0.343	0	PSMA2	IFNT+Tro_2
0	0.946773	0.89	0.47	0	PRXL2A	IFNT+Tro_2
0	0.647576	0.536	0.344	0	PRR5	IFNT+Tro_2
0	0.545565	0.563	0.334	0	PRELID1	IFNT+Tro_2
0	1.40959	0.969	0.562	0	PRDX5	IFNT+Tro_2
0	1.13919	0.898	0.498	0	PRDX2	IFNT+Tro_2
0	1.39559	0.997	0.69	0	PRDX1	IFNT+Tro_2
0	1.37115	0.623	0.222	0	PPP1R14A	IFNT+Tro_2
0	1.17922	0.73	0.396	0	PPP1CA	IFNT+Tro_2
0	1.1077	0.897	0.572	0	PPIB	IFNT+Tro_2
0	1.75198	0.531	0.194	0	PPDPF	IFNT+Tro_2
0	0.765221	0.767	0.465	0	POMP	IFNT+Tro_2
0	1.83178	0.866	0.365	0	POLR2L	IFNT+Tro_2
0	1.25861	0.564	0.256	0	POLR2G	IFNT+Tro_2
0	1.28483	0.59	0.271	0	POLR2F	IFNT+Tro_2
0	0.829987	0.589	0.351	0	PNP	IFNT+Tro_2
0	1.21738	0.607	0.305	0	PLP2	IFNT+Tro_2
0	1.4823	0.716	0.279	0	PLIN3	IFNT+Tro_2
0	1.10452	0.96	0.434	0	PLAC8A	IFNT+Tro_2
0	0.732103	0.586	0.273	0	PLA2G7	IFNT+Tro_2
0	0.632252	0.897	0.655	0	PKM	IFNT+Tro_2
0	0.844176	0.558	0.287	0	PKIB	IFNT+Tro_2
0	0.534876	0.654	0.329	0	PINLYP	IFNT+Tro_2
0	1.38139	0.626	0.293	0	PIN1	IFNT+Tro_2
0	1.60475	0.717	0.306	0	PHPT1	IFNT+Tro_2
0	1.1587	0.569	0.3	0	PHB2	IFNT+Tro_2
0	0.794085	0.624	0.325	0	PHB1	IFNT+Tro_2
0	0.938769	0.521	0.296	0	PGP	IFNT+Tro_2
0	1.53078	0.514	0.241	0	PGLS	IFNT+Tro_2
0	0.964274	0.723	0.433	0	PGK1	IFNT+Tro_2
0	0.54252	0.65	0.402	0	PGAM1	IFNT+Tro_2
0	2.41807	0.999	0.667	0	PFN1	IFNT+Tro_2
0	1.03441	0.533	0.303	0	PFKL	IFNT+Tro_2
0	0.816714	0.539	0.308	0	PFDN6	IFNT+Tro_2
0	0.914033	0.575	0.316	0	PFDN5	IFNT+Tro_2
0	0.555137	0.583	0.387	0	PFDN2	IFNT+Tro_2
0	0.564127	0.533	0.328	0	PERP	IFNT+Tro_2
0	0.5175	0.588	0.351	0	PEBP1	IFNT+Tro_2
0	0.695991	0.58	0.362	0	PDXK	IFNT+Tro_2
0	0.935487	0.684	0.371	0	PARK7	IFNT+Tro_2
0	0.912027	0.514	0.199	0	PAG12	IFNT+Tro_2
0	0.567033	0.775	0.544	0	P4HB	IFNT+Tro_2
0	0.599585	0.501	0.324	0	OSTC	IFNT+Tro_2
0	1.44052	0.874	0.413	0	ODC1	IFNT+Tro_2
0	1.11922	0.753	0.387	0	OAZ1	IFNT+Tro_2
0	1.02458	0.996	0.761	0	NPAS2	IFNT+Tro_2
0	0.736298	0.52	0.283	0	NOP10	IFNT+Tro_2
0	1.14818	0.956	0.531	0	NME2	IFNT+Tro_2
0	1.12686	0.66	0.332	0	NEDD8	IFNT+Tro_2
0	1.26701	0.63	0.306	0	NDUFV1	IFNT+Tro_2
0	1.52003	0.785	0.366	0	NDUFS8	IFNT+Tro_2
0	1.49201	0.747	0.337	0	NDUFS7	IFNT+Tro_2
0	1.33979	0.769	0.36	0	NDUFS6	IFNT+Tro_2
0	1.12932	0.69	0.349	0	NDUFS5	IFNT+Tro_2
0	0.864436	0.575	0.32	0	NDUFS2	IFNT+Tro_2
0	0.882378	0.519	0.305	0	NDUFC2	IFNT+Tro_2
0	0.748619	0.647	0.345	0	NDUFC1	IFNT+Tro_2
0	1.04683	0.622	0.304	0	NDUFB9	IFNT+Tro_2
0	1.15027	0.808	0.419	0	NDUFB8	IFNT+Tro_2
0	1.55491	0.803	0.36	0	NDUFB7	IFNT+Tro_2
0	0.739876	0.534	0.306	0	NDUFB5	IFNT+Tro_2
0	0.820198	0.565	0.315	0	NDUFB4	IFNT+Tro_2
0	2.04074	0.666	0.248	0	NDUFB2	IFNT+Tro_2
0	1.59808	0.701	0.303	0	NDUFB11	IFNT+Tro_2
0	1.06037	0.755	0.379	0	NDUFB10	IFNT+Tro_2
0	1.18022	0.739	0.35	0	NDUFB1	IFNT+Tro_2
0	0.984255	0.646	0.331	0	NDUFAB1	IFNT+Tro_2
0	1.19037	0.535	0.263	0	NDUFA8	IFNT+Tro_2
0	1.69273	0.737	0.321	0	NDUFA7	IFNT+Tro_2
0	0.955168	0.651	0.346	0	NDUFA6	IFNT+Tro_2
0	0.601625	0.509	0.31	0	NDUFA5	IFNT+Tro_2
0	1.06715	0.948	0.551	0	NDUFA4	IFNT+Tro_2
0	1.97641	0.691	0.266	0	NDUFA3	IFNT+Tro_2
0	0.910978	0.592	0.295	0	NDUFA2	IFNT+Tro_2
0	1.88348	0.825	0.329	0	NDUFA11	IFNT+Tro_2
0	1.39862	0.742	0.328	0	NDUFA1	IFNT+Tro_2
0	0.543209	0.897	0.602	0	NACA	IFNT+Tro_2
0	1.20998	0.987	0.755	0	MYL6	IFNT+Tro_2
0	0.736305	0.527	0.308	0	MRPS33	IFNT+Tro_2
0	1.2957	0.7	0.326	0	MRPS26	IFNT+Tro_2
0	1.60002	0.665	0.283	0	MRPL57	IFNT+Tro_2
0	1.06489	0.582	0.285	0	MRPL52	IFNT+Tro_2
0	1.40939	0.727	0.346	0	MRPL41	IFNT+Tro_2
0	1.34808	0.68	0.309	0	MRPL27	IFNT+Tro_2
0	1.30766	0.701	0.337	0	MRPL23	IFNT+Tro_2
0	1.0858	0.546	0.254	0	MRPL12	IFNT+Tro_2
0	1.10498	0.57	0.276	0	MRPL11	IFNT+Tro_2
0	0.540832	0.677	0.464	0	MRFAP1L1	IFNT+Tro_2
0	2.33142	0.775	0.338	0	MIF	IFNT+Tro_2
0	1.43013	0.7	0.328	0	MICOS13	IFNT+Tro_2
0	1.13221	0.694	0.398	0	MGST1	IFNT+Tro_2
0	1.18772	0.825	0.429	0	MDH2	IFNT+Tro_2
0	0.973224	0.644	0.363	0	MDH1	IFNT+Tro_2
0	0.938336	0.673	0.37	0	MANF	IFNT+Tro_2
0	1.34124	0.701	0.301	0	LSM7	IFNT+Tro_2
0	0.687961	0.514	0.292	0	LSM4	IFNT+Tro_2
0	1.02499	0.651	0.323	0	LSM3	IFNT+Tro_2
0	0.667853	0.588	0.375	0	LMNA	IFNT+Tro_2
0	0.507412	0.641	0.416	0	LIMK2	IFNT+Tro_2
0	0.850457	0.65	0.383	0	LDHA	IFNT+Tro_2
0	0.849795	0.606	0.391	0	LAMTOR4	IFNT+Tro_2
0	1.48085	0.642	0.278	0	LAMTOR2	IFNT+Tro_2
0	1.20312	0.531	0.26	0	LAMTOR1	IFNT+Tro_2
0	1.13504	0.6	0.324	0	KRTCAP2	IFNT+Tro_2
0	1.22447	1	0.65	0	KRT8	IFNT+Tro_2
0	1.96878	0.658	0.192	0	KRT7	IFNT+Tro_2
0	1.85391	0.999	0.671	0	KRT19	IFNT+Tro_2
0	1.0169	0.998	0.597	0	KRT18	IFNT+Tro_2
0	0.716759	0.61	0.395	0	KDELR2	IFNT+Tro_2
0	1.35692	0.647	0.319	0	KDELR1	IFNT+Tro_2
0	1.0941	0.953	0.646	0	JPT1	IFNT+Tro_2
0	2.61368	0.505	0.128	0	IGFL1	IFNT+Tro_2
0	1.90706	0.976	0.388	0	IFNT3	IFNT+Tro_2
0	2.8787	0.959	0.305	0	IFNT2	IFNT+Tro_2
0	2.51507	0.981	0.397	0	IFNT	IFNT+Tro_2
0	1.38049	0.523	0.262	0	IER3	IFNT+Tro_2
0	0.984343	0.711	0.371	0	IDH1	IFNT+Tro_2
0	0.636486	0.623	0.369	0	HYPK	IFNT+Tro_2
0	2.04543	0.991	0.626	0	HSPB1	IFNT+Tro_2
0	1.17088	0.589	0.316	0	HSBP1.1	IFNT+Tro_2
0	0.558941	0.655	0.421	0	HNRNPAB	IFNT+Tro_2
0	0.625205	0.782	0.597	0	HMGN1	IFNT+Tro_2
0	0.898099	0.762	0.39	0	HMGA1	IFNT+Tro_2
0	1.49749	0.894	0.452	0	HINT1	IFNT+Tro_2
0	1.54611	0.824	0.361	0	HAND1	IFNT+Tro_2
0	0.595536	0.837	0.551	0	H3-3B	IFNT+Tro_2
0	0.737601	0.662	0.393	0	H2AZ2	IFNT+Tro_2
0	0.627694	0.815	0.47	0	H2AZ1	IFNT+Tro_2
0	1.67984	0.791	0.378	0	H2AJ	IFNT+Tro_2
0	1.11247	0.504	0.275	0	GUK1	IFNT+Tro_2
0	0.980424	0.862	0.54	0	GSTP1.1	IFNT+Tro_2
0	1.66201	0.941	0.571	0	GPX4	IFNT+Tro_2
0	1.01254	0.689	0.411	0	GPI	IFNT+Tro_2
0	0.866978	0.744	0.44	0	GNG5	IFNT+Tro_2
0	1.46463	0.611	0.3	0	GNB2	IFNT+Tro_2
0	1.0839	0.832	0.464	0	GLRX	IFNT+Tro_2
0	1.97691	1	0.764	0	GAPDH	IFNT+Tro_2
0	0.997233	0.683	0.363	0	GABARAP	IFNT+Tro_2
0	1.27987	0.771	0.354	0	FXYD4	IFNT+Tro_2
0	0.714417	0.827	0.514	0	FURIN	IFNT+Tro_2
0	1.35501	0.991	0.654	0	FTL	IFNT+Tro_2
0	1.39644	1	0.793	0	FTH1	IFNT+Tro_2
0	2.10139	0.705	0.213	0	FSCN1	IFNT+Tro_2
0	1.3192	0.691	0.369	0	FKBP2	IFNT+Tro_2
0	1.0353	0.505	0.274	0	FKBP11	IFNT+Tro_2
0	1.24152	0.586	0.315	0	FDPS	IFNT+Tro_2
0	0.597718	0.65	0.357	0	FBL	IFNT+Tro_2
0	1.33779	0.996	0.68	0	FAU	IFNT+Tro_2
0	1.13713	0.516	0.261	0	FAM32A	IFNT+Tro_2
0	0.957621	0.523	0.29	0	FADS2	IFNT+Tro_2
0	1.26458	0.81	0.3	0	FADS1	IFNT+Tro_2
0	2.07234	0.997	0.713	0	FABP5	IFNT+Tro_2
0	0.769261	0.681	0.392	0	ERH	IFNT+Tro_2
0	3.43151	0.85	0.172	0	ENSBTAG00000053057	IFNT+Tro_2
0	2.12993	0.694	0.227	0	ENSBTAG00000053048	IFNT+Tro_2
0	2.67308	0.976	0.422	0	ENSBTAG00000050611	IFNT+Tro_2
0	2.41305	0.634	0.196	0	ENSBTAG00000049167	IFNT+Tro_2
0	1.2174	0.808	0.43	0	ENSBTAG00000040602	IFNT+Tro_2
0	2.47017	0.663	0.215	0	ENSBTAG00000039728	IFNT+Tro_2
0	1.18703	0.921	0.52	0	ENSBTAG00000039555	IFNT+Tro_2
0	1.08456	0.693	0.352	0	ENSBTAG00000038330	IFNT+Tro_2
0	1.2879	0.548	0.257	0	ENSBTAG00000037775	IFNT+Tro_2
0	0.720267	0.597	0.327	0	ENSBTAG00000030305	IFNT+Tro_2
0	3.06688	0.603	0.181	0	ENSBTAG00000027787	IFNT+Tro_2
0	1.33428	0.787	0.342	0	ENSBTAG00000025385	IFNT+Tro_2
0	1.69006	0.737	0.307	0	ENSBTAG00000023792	IFNT+Tro_2
0	2.44239	0.581	0.155	0	ENSBTAG00000009783	IFNT+Tro_2
0	2.00803	0.575	0.223	0	ENSBTAG00000008632	IFNT+Tro_2
0	2.467	0.635	0.2	0	ENSBTAG00000005315	IFNT+Tro_2
0	1.43004	0.517	0.212	0	ENSBTAG00000003937	IFNT+Tro_2
0	1.01612	0.962	0.654	0	ENO1	IFNT+Tro_2
0	0.507521	0.585	0.396	0	ELOB	IFNT+Tro_2
0	1.15138	0.513	0.252	0	EIF6	IFNT+Tro_2
0	1.37957	0.902	0.459	0	EIF5A	IFNT+Tro_2
0	0.693344	0.936	0.675	0	EIF4A1	IFNT+Tro_2
0	0.956539	0.69	0.382	0	EIF3K	IFNT+Tro_2
0	1.01777	0.668	0.347	0	EIF3G	IFNT+Tro_2
0	0.555578	0.695	0.476	0	EIF2S2	IFNT+Tro_2
0	0.794889	0.725	0.394	0	EIF1AX	IFNT+Tro_2
0	0.525817	0.861	0.565	0	EIF1	IFNT+Tro_2
0	0.994428	0.977	0.672	0	EEF1G	IFNT+Tro_2
0	1.1816	0.948	0.542	0	EEF1D	IFNT+Tro_2
0	0.740571	0.886	0.528	0	EEF1B2	IFNT+Tro_2
0	1.62471	0.76	0.333	0	EDF1	IFNT+Tro_2
0	0.785083	0.815	0.435	0	DYNLL1	IFNT+Tro_2
0	0.521415	0.568	0.371	0	DUT	IFNT+Tro_2
0	1.3967	0.546	0.245	0	DTYMK	IFNT+Tro_2
0	1.55441	0.987	0.706	0	DSTN	IFNT+Tro_2
0	1.18691	0.546	0.263	0	DNPH1	IFNT+Tro_2
0	1.19356	0.708	0.335	0	DDT	IFNT+Tro_2
0	1.2897	0.924	0.543	0	DBI	IFNT+Tro_2
0	1.04187	0.76	0.452	0	DAD1	IFNT+Tro_2
0	0.670991	0.814	0.401	0	CYCS	IFNT+Tro_2
0	1.48155	0.848	0.415	0	CYC1	IFNT+Tro_2
0	0.615437	0.506	0.331	0	CYB5R3	IFNT+Tro_2
0	1.45984	0.977	0.557	0	CSTB.1	IFNT+Tro_2
0	0.822903	0.91	0.604	0	CST3	IFNT+Tro_2
0	0.96616	0.834	0.4	0	CSRP2	IFNT+Tro_2
0	1.00924	0.544	0.283	0	CSNK2B	IFNT+Tro_2
0	1.25449	0.86	0.444	0	COX8A	IFNT+Tro_2
0	1.00896	0.763	0.399	0	COX7B	IFNT+Tro_2
0	0.645694	0.56	0.324	0	COX7A2L	IFNT+Tro_2
0	1.17016	0.943	0.529	0	COX7A2	IFNT+Tro_2
0	1.34115	0.908	0.53	0	COX6C	IFNT+Tro_2
0	1.91691	0.923	0.43	0	COX6B1	IFNT+Tro_2
0	1.2503	0.914	0.49	0	COX6A1	IFNT+Tro_2
0	1.63221	0.954	0.491	0	COX5B	IFNT+Tro_2
0	1.25775	0.889	0.452	0	COX5A	IFNT+Tro_2
0	1.36514	0.967	0.635	0	COX4I1	IFNT+Tro_2
0	1.31229	0.584	0.284	0	COX14	IFNT+Tro_2
0	0.621749	0.872	0.647	0	COTL1	IFNT+Tro_2
0	1.35982	0.762	0.358	0	COPS9	IFNT+Tro_2
0	1.52263	0.799	0.404	0	COPE	IFNT+Tro_2
0	1.04101	0.606	0.303	0	COA3	IFNT+Tro_2
0	0.832835	0.592	0.381	0	CNDP2	IFNT+Tro_2
0	0.539785	0.872	0.585	0	CLTA	IFNT+Tro_2
0	1.69775	0.814	0.331	0	CLDN6	IFNT+Tro_2
0	0.582489	0.512	0.317	0	CKS2	IFNT+Tro_2
0	1.33071	0.634	0.27	0	CKMT1A	IFNT+Tro_2
0	1.18803	0.575	0.294	0	CHMP2A	IFNT+Tro_2
0	1.19447	0.559	0.303	0	CHID1	IFNT+Tro_2
0	0.896775	0.854	0.468	0	CHCHD2	IFNT+Tro_2
0	1.66269	0.817	0.334	0	CHCHD10	IFNT+Tro_2
0	1.67215	0.968	0.562	0	CFL1	IFNT+Tro_2
0	0.680713	0.878	0.636	0	CD63	IFNT+Tro_2
0	1.17674	0.874	0.394	0	CD24	IFNT+Tro_2
0	1.53411	0.615	0.282	0	CCDC167	IFNT+Tro_2
0	1.16009	0.586	0.332	0	CARHSP1	IFNT+Tro_2
0	1.85943	0.936	0.377	0	CAPG	IFNT+Tro_2
0	0.59099	0.651	0.478	0	CAP1	IFNT+Tro_2
0	0.520433	0.94	0.706	0	CALR	IFNT+Tro_2
0	2.3915	0.961	0.467	0	CALML5	IFNT+Tro_2
0	1.21374	0.727	0.361	0	CALM3	IFNT+Tro_2
0	0.770135	0.971	0.766	0	CALM1	IFNT+Tro_2
0	0.6537	0.587	0.356	0	C6H4orf3	IFNT+Tro_2
0	0.50283	0.629	0.331	0	C1QBP	IFNT+Tro_2
0	2.27403	0.51	0.103	0	C15H11orf96	IFNT+Tro_2
0	0.687997	0.518	0.309	0	BUD31	IFNT+Tro_2
0	1.48997	0.922	0.56	0	BSG	IFNT+Tro_2
0	0.759266	0.628	0.337	0	BRI3	IFNT+Tro_2
0	1.87064	0.502	0.175	0	BOK	IFNT+Tro_2
0	1.22153	0.674	0.414	0	BCAP31	IFNT+Tro_2
0	1.22818	0.818	0.432	0	BCAM	IFNT+Tro_2
0	2.22191	0.772	0.272	0	BBLN	IFNT+Tro_2
0	0.61628	0.876	0.514	0	BASP1	IFNT+Tro_2
0	1.12833	0.555	0.274	0	BANF1	IFNT+Tro_2
0	0.77038	0.589	0.338	0	ATP6V1G1	IFNT+Tro_2
0	1.75197	0.772	0.314	0	ATP6V1F	IFNT+Tro_2
0	0.763028	0.644	0.401	0	ATP6V0D1	IFNT+Tro_2
0	0.916795	0.709	0.419	0	ATP6V0B	IFNT+Tro_2
0	0.856243	0.787	0.466	0	ATP5PO	IFNT+Tro_2
0	0.826984	0.77	0.42	0	ATP5PF	IFNT+Tro_2
0	0.922354	0.866	0.459	0	ATP5PD	IFNT+Tro_2
0	1.22906	0.87	0.43	0	ATP5MK	IFNT+Tro_2
0	1.9311	0.949	0.464	0	ATP5MJ	IFNT+Tro_2
0	1.4358	0.961	0.554	0	ATP5MG	IFNT+Tro_2
0	1.4258	0.949	0.518	0	ATP5MF	IFNT+Tro_2
0	1.59884	0.962	0.515	0	ATP5ME	IFNT+Tro_2
0	0.998914	0.965	0.583	0	ATP5MC3	IFNT+Tro_2
0	1.18253	0.701	0.337	0	ATP5MC2	IFNT+Tro_2
0	1.45542	0.92	0.432	0	ATP5MC1	IFNT+Tro_2
0	1.21386	0.888	0.461	0	ATP5IF1	IFNT+Tro_2
0	1.06943	0.924	0.525	0	ATP5F1E	IFNT+Tro_2
0	1.63088	0.909	0.429	0	ATP5F1D	IFNT+Tro_2
0	0.522721	0.722	0.493	0	ATP5F1C	IFNT+Tro_2
0	0.633783	0.846	0.586	0	ATP5F1B	IFNT+Tro_2
0	0.527454	0.754	0.55	0	ATP5F1A	IFNT+Tro_2
0	1.48777	0.852	0.402	0	ATOX1	IFNT+Tro_2
0	2.407	0.531	0.109	0	ASS1	IFNT+Tro_2
0	0.902308	0.552	0.293	0	ARPC5L	IFNT+Tro_2
0	0.864132	0.671	0.404	0	ARPC4	IFNT+Tro_2
0	1.50916	0.853	0.453	0	ARHGDIB	IFNT+Tro_2
0	0.789331	0.533	0.34	0	ARHGDIA	IFNT+Tro_2
0	1.69388	0.634	0.254	0	APRT	IFNT+Tro_2
0	0.931719	0.643	0.32	0	AP2S1	IFNT+Tro_2
0	0.568403	0.595	0.373	0	ANXA8L1	IFNT+Tro_2
0	0.786222	0.959	0.771	0	ANXA2	IFNT+Tro_2
0	1.22334	0.851	0.519	0	AMDHD2	IFNT+Tro_2
0	0.865174	0.607	0.33	0	ALYREF	IFNT+Tro_2
0	1.50222	0.963	0.597	0	ALDOA	IFNT+Tro_2
0	1.79895	0.997	0.708	0	AKR1B1	IFNT+Tro_2
0	1.59572	0.605	0.269	0	AGTRAP	IFNT+Tro_2
0	0.651203	0.997	0.875	0	ACTG1	IFNT+Tro_2
0	1.10073	0.999	0.893	0	ACTB	IFNT+Tro_2
0	0.959676	0.561	0.324	0	ACAA1	IFNT+Tro_2
0	1.30268	0.999	0.836	0	ZC3H10	mural TE
0	0.606397	0.709	0.604	0	YWHAQ	mural TE
0	1.0251	0.848	0.713	0	YWHAE	mural TE
0	0.620242	0.749	0.644	0	YWHAB	mural TE
0	1.12129	0.841	0.563	0	YBX1	mural TE
0	1.19765	0.616	0.384	0	WDR83OS	mural TE
0	0.793439	0.551	0.396	0	VSIG10L	mural TE
0	1.3498	0.786	0.518	0	VDAC2	mural TE
0	1.43565	0.548	0.332	0	VDAC1	mural TE
0	2.14539	0.86	0.402	0	UQCRQ	mural TE
0	1.70141	0.901	0.55	0	UQCRH	mural TE
0	1.34233	0.576	0.342	0	UQCRFS1	mural TE
0	0.959392	0.5	0.357	0	UQCRC1	mural TE
0	1.83925	0.794	0.45	0	UQCRB	mural TE
0	1.36601	0.853	0.485	0	UQCR11	mural TE
0	1.72191	0.859	0.47	0	UQCR10	mural TE
0	1.0739	0.601	0.383	0	UBL5	mural TE
0	1.28683	0.758	0.451	0	UBE2S	mural TE
0	1.35571	0.621	0.41	0	UBE2L3	mural TE
0	1.32911	0.998	0.802	0	UBA52	mural TE
0	1.28953	0.556	0.37	0	U2AF1	mural TE
0	1.84339	0.89	0.511	0	TXN	mural TE
0	1.23077	0.776	0.483	0	TUBB4B	mural TE
0	1.2994	0.939	0.629	0	TUBA1B	mural TE
0	0.825071	0.988	0.748	0	TPT1	mural TE
0	1.52088	0.839	0.582	0	TPM3	mural TE
0	0.579158	0.707	0.496	0	TPI1	mural TE
0	1.97582	0.668	0.325	0	TOMM7	mural TE
0	1.69083	0.715	0.371	0	TOMM6	mural TE
0	2.32366	0.789	0.339	0	TOMM5	mural TE
0	1.49784	0.648	0.402	0	TOMM20	mural TE
0	1.32599	0.618	0.364	0	TMEM258	mural TE
0	1.34374	0.566	0.325	0	TMEM147	mural TE
0	1.58778	0.799	0.503	0	TMA7	mural TE
0	1.7504	0.55	0.291	0	TIMM8B	mural TE
0	1.81261	0.59	0.278	0	TIMM13	mural TE
0	1.80906	0.531	0.258	0	TIMM10	mural TE
0	1.64524	0.619	0.361	0	TBC1D32	mural TE
0	1.14492	0.654	0.435	0	TALDO1	mural TE
0	1.59214	0.701	0.374	0	TAGLN2	mural TE
0	1.21826	0.695	0.448	0	SUMO2	mural TE
0	0.672249	0.558	0.442	0	SUB1	mural TE
0	0.801421	0.66	0.528	0	ST13	mural TE
0	0.932845	0.928	0.636	0	SSR4	mural TE
3.27128e-202	0.524688	0.619	0.548	6.34629e-198	SSR3	mural TE
6.8754e-128	0.519086	0.537	0.477	1.33383e-123	SSR1	mural TE
0	1.59328	0.602	0.347	0	SSB	mural TE
0	1.56105	0.532	0.3	0	SRSF9	mural TE
0	2.0445	0.524	0.206	0	SRM	mural TE
0	1.38031	0.55	0.337	0	SPCS3	mural TE
0	1.78621	0.542	0.273	0	SNU13	mural TE
0	1.77489	0.75	0.403	0	SNRPG	mural TE
0	1.82327	0.574	0.313	0	SNRPF	mural TE
0	1.35017	0.748	0.465	0	SNRPD3	mural TE
0	1.49869	0.722	0.4	0	SNRPD2	mural TE
0	1.71937	0.734	0.401	0	SNRPD1	mural TE
0	1.51145	0.506	0.301	0	SNRPC	mural TE
0	1.17975	0.503	0.343	0	SNRPB2	mural TE
0	1.61683	0.64	0.344	0	SNRPB	mural TE
0	1.41882	0.536	0.338	0	SNRPA1	mural TE
0	2.31475	0.597	0.253	0	SLIRP	mural TE
0	2.12916	0.508	0.109	0	SLC34A2	mural TE
0	1.24979	0.96	0.641	0	SLC25A6	mural TE
0	1.58191	0.707	0.356	0	SLC25A5	mural TE
0	1.40041	0.815	0.518	0	SLC25A3	mural TE
0	1.41752	0.705	0.368	0	SFN	mural TE
0	1.27934	0.713	0.444	0	SET	mural TE
0	0.931003	0.524	0.348	0	SERP1	mural TE
0	1.49644	0.883	0.636	0	SERBP1	mural TE
0	0.967763	0.682	0.49	0	SEM1	mural TE
0	1.79669	0.738	0.469	0	SEC61G	mural TE
0	1.49827	0.819	0.502	0	SEC61B	mural TE
4.71959e-215	0.647269	0.581	0.533	9.156e-211	SCP2	mural TE
0	1.40319	0.564	0.326	0	SAP18	mural TE
0	1.76245	0.745	0.345	0	S100A16	mural TE
0	1.28301	0.89	0.528	0	S100A14	mural TE
0	1.85883	0.503	0.251	0	RWDD1	mural TE
0	1.42243	0.685	0.403	0	RTRAF	mural TE
0	1.05681	0.999	0.826	0	RPSA	mural TE
0	1.37655	0.998	0.787	0	RPS9	mural TE
0	1.28329	0.999	0.805	0	RPS8	mural TE
0	1.17581	0.97	0.72	0	RPS7	mural TE
0	1.26569	0.961	0.688	0	RPS6	mural TE
0	1.33148	0.999	0.777	0	RPS5	mural TE
0	1.51204	0.558	0.302	0	RPS4Y1	mural TE
0	1.21303	0.976	0.66	0	RPS4X	mural TE
0	1.17865	0.986	0.74	0	RPS3A	mural TE
0	0.989885	0.959	0.684	0	RPS3	mural TE
0	1.8358	0.99	0.752	0	RPS29	mural TE
0	1.68199	0.999	0.788	0	RPS28	mural TE
0	1.37143	0.995	0.768	0	RPS27A	mural TE
0	1.55895	0.983	0.731	0	RPS27	mural TE
0	1.88534	0.979	0.648	0	RPS26	mural TE
0	1.55391	0.978	0.708	0	RPS25	mural TE
0	1.32583	0.993	0.839	0	RPS24	mural TE
0	1.57642	0.982	0.698	0	RPS23	mural TE
0	1.73178	0.951	0.653	0	RPS21	mural TE
0	1.78272	0.998	0.777	0	RPS20	mural TE
0	1.00334	0.998	0.808	0	RPS2	mural TE
0	1.40368	0.996	0.804	0	RPS19	mural TE
0	1.22293	0.998	0.81	0	RPS18	mural TE
0	1.3183	0.951	0.657	0	RPS17	mural TE
0	1.32401	0.958	0.665	0	RPS16	mural TE
0	1.85399	0.974	0.67	0	RPS15A	mural TE
0	1.56029	0.991	0.728	0	RPS15	mural TE
0	1.30825	0.997	0.796	0	RPS14	mural TE
0	1.49721	0.984	0.695	0	RPS13	mural TE
0	1.36397	0.999	0.802	0	RPS12	mural TE
0	1.25703	0.991	0.734	0	RPS11	mural TE
0	1.36758	0.997	0.779	0	RPS10	mural TE
0	1.41213	0.996	0.775	0	RPLP2	mural TE
0	1.51329	0.998	0.789	0	RPLP1	mural TE
0	1.06627	0.995	0.722	0	RPLP0	mural TE
0	1.4843	0.976	0.683	0	RPL9	mural TE
0	1.21714	0.997	0.745	0	RPL8	mural TE
0	1.2416	0.999	0.774	0	RPL7A	mural TE
0	1.24892	0.971	0.698	0	RPL7	mural TE
0	1.50896	0.996	0.757	0	RPL6	mural TE
0	1.30492	0.956	0.706	0	RPL5	mural TE
0	0.574485	0.797	0.643	0	RPL4	mural TE
0	1.62669	0.983	0.618	0	RPL39	mural TE
0	1.80632	0.972	0.668	0	RPL38	mural TE
0	1.63149	0.984	0.732	0	RPL37A	mural TE
0	1.76693	0.984	0.699	0	RPL37	mural TE
0	1.69736	0.918	0.615	0	RPL36AL	mural TE
0	2.06642	0.916	0.511	0	RPL36A	mural TE
0	1.448	0.976	0.693	0	RPL36	mural TE
0	1.56851	0.98	0.726	0	RPL35A	mural TE
0	1.14444	0.983	0.728	0	RPL35	mural TE
0	1.72603	0.986	0.722	0	RPL34	mural TE
0	1.25404	0.991	0.752	0	RPL32	mural TE
0	1.66341	0.981	0.694	0	RPL30	mural TE
0	1.25121	0.959	0.666	0	RPL3	mural TE
0	1.32553	0.989	0.686	0	RPL29	mural TE
0	1.32941	0.995	0.723	0	RPL28	mural TE
0	1.37572	0.994	0.778	0	RPL27A	mural TE
0	1.40011	0.944	0.702	0	RPL27	mural TE
0	1.66245	0.967	0.663	0	RPL26	mural TE
0	1.53722	0.994	0.75	0	RPL24	mural TE
0	1.09843	0.928	0.736	0	RPL23A	mural TE
0	1.47867	0.996	0.776	0	RPL23	mural TE
0	1.69317	0.646	0.319	0	RPL22L1	mural TE
0	1.6998	0.944	0.67	0	RPL22	mural TE
0	1.33825	0.933	0.693	0	RPL21	mural TE
0	1.36636	0.961	0.663	0	RPL19	mural TE
0	1.28395	0.994	0.731	0	RPL18A	mural TE
0	1.18711	0.994	0.762	0	RPL18	mural TE
0	1.4293	0.839	0.541	0	RPL17	mural TE
0	1.38774	0.979	0.673	0	RPL15	mural TE
0	1.53918	0.995	0.732	0	RPL14	mural TE
0	1.19166	0.992	0.765	0	RPL13A	mural TE
0	1.21056	0.989	0.752	0	RPL13	mural TE
0	1.24041	0.987	0.676	0	RPL12	mural TE
0	1.28041	0.991	0.827	0	RPL11	mural TE
0	1.4422	0.986	0.74	0	RPL10A	mural TE
0	1.19298	0.998	0.757	0	RPL10	mural TE
0	1.73768	0.738	0.378	0	ROMO1	mural TE
0	1.28111	0.549	0.368	0	RNPS1	mural TE
0	0.902915	0.662	0.489	0	RNH1	mural TE
0	1.70693	0.515	0.251	0	RNASEH2C	mural TE
0	1.08687	0.583	0.423	0	RBX1	mural TE
0	1.66365	0.588	0.311	0	RBM8A	mural TE
0	2.07999	0.81	0.366	0	RANBP1	mural TE
0	1.72622	0.892	0.529	0	RAN	mural TE
0	0.921676	0.946	0.695	0	RACK1	mural TE
0	1.02856	0.523	0.361	0	RAB5IF	mural TE
0	0.892582	0.524	0.365	0	RAB25	mural TE
0	1.13466	0.663	0.486	0	RAB11A	mural TE
0	1.11121	0.577	0.376	0	PTMS	mural TE
0	1.41424	0.983	0.72	0	PTMA	mural TE
0	0.620482	0.674	0.574	0	PTGES3	mural TE
0	1.33437	0.507	0.33	0	PSMD4	mural TE
0	1.02411	0.524	0.356	0	PSMC5	mural TE
0	1.03377	0.514	0.358	0	PSMC3	mural TE
0	1.1541	0.519	0.339	0	PSMC1	mural TE
0	1.08375	0.573	0.356	0	PSMB6	mural TE
0	1.14353	0.622	0.375	0	PSMB5	mural TE
0	1.22243	0.6	0.363	0	PSMB4	mural TE
0	1.23635	0.694	0.461	0	PSMB2	mural TE
0	0.99017	0.577	0.396	0	PSMB1	mural TE
0	1.30912	0.797	0.499	0	PSMA7	mural TE
0	1.03606	0.511	0.387	0	PSMA6	mural TE
0	1.25278	0.517	0.331	0	PSMA4	mural TE
0	1.35948	0.535	0.342	0	PSMA2	mural TE
0	1.56389	0.611	0.35	0	PSMA1	mural TE
0	1.73519	0.625	0.326	0	PRELID1	mural TE
0	1.8203	0.552	0.262	0	PRDX6	mural TE
0	1.45545	0.906	0.566	0	PRDX5	mural TE
0	1.46833	0.846	0.5	0	PRDX2	mural TE
0	1.45745	0.993	0.688	0	PRDX1	mural TE
0	1.92393	0.84	0.459	0	PPIA	mural TE
0	1.29469	0.732	0.466	0	POMP	mural TE
0	1.59371	0.724	0.376	0	POLR2L	mural TE
0	1.54195	0.518	0.276	0	POLR2F	mural TE
0	1.16718	0.547	0.294	0	PLIN3	mural TE
0	1.97681	0.963	0.429	0	PLAC8A	mural TE
0	0.987947	0.84	0.66	0	PKM	mural TE
0	1.15686	0.523	0.323	0	PHPT1	mural TE
0	1.90834	0.673	0.317	0	PHB1	mural TE
1.25026e-171	0.524353	0.532	0.45	2.4255e-167	PGK1	mural TE
0	0.723967	0.562	0.409	0	PGAM1	mural TE
0	1.4168	0.527	0.308	0	PFDN6	mural TE
0	1.05169	0.542	0.39	0	PFDN2	mural TE
0	0.964045	0.597	0.492	0	PFDN1	mural TE
0	1.21068	0.594	0.349	0	PEBP1	mural TE
0	1.20229	0.517	0.348	0	PDCD6	mural TE
0	0.922785	0.558	0.382	0	PARK7	mural TE
0	2.09184	0.858	0.421	0	PA2G4	mural TE
0	1.25727	0.506	0.322	0	OSTC	mural TE
0	0.897501	0.588	0.402	0	OAZ1	mural TE
0	1.25032	0.514	0.338	0	NUDC	mural TE
6.7299e-122	0.508116	0.533	0.479	1.3056e-117	NUCKS1	mural TE
0	1.82834	0.636	0.326	0	NSA2	mural TE
0	2.14463	0.695	0.324	0	NPM1	mural TE
0	1.48499	0.991	0.759	0	NPAS2	mural TE
0	1.27524	0.524	0.336	0	NOP56	mural TE
0	1.99087	0.593	0.273	0	NOP10	mural TE
0	1.56478	0.917	0.532	0	NME2	mural TE
0	1.85128	0.505	0.245	0	NME1	mural TE
0	1.87446	0.585	0.284	0	NIFK	mural TE
0	2.42	0.71	0.213	0	NHERF1	mural TE
0	1.34369	0.572	0.339	0	NEDD8	mural TE
0	1.11481	0.541	0.383	0	NDUFV2	mural TE
0	1.23941	0.622	0.38	0	NDUFS8	mural TE
0	1.22418	0.581	0.351	0	NDUFS7	mural TE
0	1.23193	0.619	0.373	0	NDUFS6	mural TE
0	1.29862	0.578	0.358	0	NDUFS5	mural TE
3.07633e-251	0.823114	0.507	0.426	5.96807e-247	NDUFS4	mural TE
0	2.08571	0.708	0.336	0	NDUFC1	mural TE
0	1.6473	0.594	0.305	0	NDUFB9	mural TE
0	1.17584	0.686	0.428	0	NDUFB8	mural TE
0	1.30194	0.642	0.374	0	NDUFB7	mural TE
0	1.33266	0.507	0.307	0	NDUFB5	mural TE
0	1.76746	0.583	0.312	0	NDUFB4	mural TE
0	1.1745	0.529	0.318	0	NDUFB11	mural TE
0	1.3884	0.679	0.384	0	NDUFB10	mural TE
0	2.14339	0.705	0.351	0	NDUFB1	mural TE
0	1.50798	0.596	0.334	0	NDUFAB1	mural TE
0	1.22928	0.557	0.337	0	NDUFA7	mural TE
0	1.56205	0.61	0.349	0	NDUFA6	mural TE
0	1.87066	0.58	0.301	0	NDUFA5	mural TE
0	1.60579	0.913	0.551	0	NDUFA4	mural TE
0	1.43003	0.504	0.282	0	NDUFA3	mural TE
0	1.84562	0.608	0.291	0	NDUFA2	mural TE
0	1.30982	0.626	0.346	0	NDUFA11	mural TE
0	1.57128	0.632	0.337	0	NDUFA1	mural TE
0	1.0427	0.806	0.558	0	ND5	mural TE
0	0.708202	0.971	0.671	0	ND4	mural TE
0	0.596312	0.98	0.66	0	ND3	mural TE
0	1.04603	0.979	0.655	0	ND2	mural TE
0	0.547011	0.969	0.648	0	ND1	mural TE
0	1.95605	0.923	0.55	0	NCL	mural TE
0	1.90792	0.546	0.242	0	NAP1L1	mural TE
0	1.44749	0.91	0.599	0	NACA	mural TE
0	0.564582	0.907	0.761	0	MYL6	mural TE
0	0.742266	0.665	0.489	0	MYL12A	mural TE
0	1.33318	0.512	0.308	0	MRPS33	mural TE
0	1.31485	0.567	0.337	0	MRPS26	mural TE
0	1.83717	0.564	0.285	0	MRPL52	mural TE
0	1.18676	0.575	0.359	0	MRPL41	mural TE
0	1.42005	0.559	0.319	0	MRPL27	mural TE
0	1.39908	0.589	0.346	0	MRPL23	mural TE
0	1.90231	0.629	0.292	0	MRPL20	mural TE
0	1.94151	0.563	0.25	0	MRPL12	mural TE
0	1.49131	0.509	0.28	0	MRPL11	mural TE
0	1.0649	0.621	0.351	0	MIF	mural TE
0	1.23535	0.552	0.34	0	MICOS13	mural TE
0	1.06829	0.608	0.445	0	METAP2	mural TE
0	0.984984	0.681	0.441	0	MDH2	mural TE
0	1.06895	0.602	0.375	0	MANF	mural TE
0	1.88699	0.66	0.302	0	LSM7	mural TE
0	1.56999	0.536	0.288	0	LSM4	mural TE
0	1.52163	0.599	0.326	0	LSM3	mural TE
0	1.19419	0.507	0.348	0	LRPAP1	mural TE
0	1.93819	0.983	0.637	0	LGALS3	mural TE
0	1.24889	0.684	0.429	0	LDHB	mural TE
4.78553e-260	0.661891	0.513	0.396	9.28393e-256	LDHA	mural TE
1.07862e-122	0.525832	0.509	0.436	2.09252e-118	LAMP1	mural TE
0	1.51187	0.998	0.647	0	KRT8	mural TE
0	1.94381	0.997	0.594	0	KRT18	mural TE
0	1.08929	0.873	0.653	0	JPT1	mural TE
0	1.90597	0.504	0.247	0	ISCA1	mural TE
0	1.63561	0.533	0.288	0	IMPDH2	mural TE
0	1.93219	0.69	0.36	0	HYPK	mural TE
0	2.25281	0.961	0.543	0	HSPE1	mural TE
0	1.78726	0.92	0.564	0	HSPD1	mural TE
0	0.665114	0.985	0.901	0	HSPA8	mural TE
0	1.61042	0.996	0.783	0	HSP90AB1	mural TE
0	0.785059	0.982	0.85	0	HSP90AA1	mural TE
0	2.81788	0.671	0.166	0	HSD17B1	mural TE
1.02698e-296	0.570538	0.696	0.635	1.99234e-292	HNRNPM	mural TE
3.17725e-239	0.619987	0.601	0.531	6.16386e-235	HNRNPK	mural TE
3.63952e-176	0.583179	0.589	0.544	7.06067e-172	HNRNPF	mural TE
0	1.18268	0.635	0.422	0	HNRNPAB	mural TE
1.46109e-197	0.527594	0.699	0.663	2.83452e-193	HNRNPA2B1	mural TE
0	0.844516	0.707	0.562	0	HNRNPA1	mural TE
0	1.70706	0.94	0.626	0	HMGB1	mural TE
0	1.56506	0.739	0.39	0	HMGA1	mural TE
0	1.27624	0.776	0.461	0	HINT1	mural TE
0	1.01728	0.799	0.553	0	H3-3B	mural TE
7.78249e-229	0.634209	0.514	0.407	1.5098e-224	H2AZ2	mural TE
0	1.65419	0.847	0.464	0	H2AZ1	mural TE
0	0.912069	0.736	0.551	0	GSTP1.1	mural TE
0	0.845679	0.784	0.585	0	GPX4	mural TE
0	2.62972	0.662	0.215	0	GPX1	mural TE
0	2.02206	0.747	0.28	0	GPD1L	mural TE
0	0.741128	0.579	0.455	0	GNG5	mural TE
0	1.34552	0.758	0.469	0	GLRX	mural TE
0	0.592116	0.984	0.764	0	GAPDH	mural TE
0	1.67757	0.758	0.352	0	FXYD4	mural TE
0	1.34546	0.982	0.652	0	FTL	mural TE
0	0.956661	0.998	0.792	0	FTH1	mural TE
0	0.926782	0.526	0.384	0	FKBP2	mural TE
0	1.90243	0.732	0.346	0	FBL	mural TE
0	1.51002	0.987	0.678	0	FAU	mural TE
0	2.16175	0.503	0.173	0	FABP3	mural TE
0	1.33283	0.66	0.392	0	ERH	mural TE
0	1.48335	0.519	0.242	0	ENSBTAG00000053048	mural TE
0	1.55534	0.539	0.297	0	ENSBTAG00000047265	mural TE
0	1.68555	0.875	0.522	0	ENSBTAG00000039555	mural TE
0	1.40778	0.623	0.357	0	ENSBTAG00000038330	mural TE
0	1.77911	0.641	0.32	0	ENSBTAG00000030305	mural TE
0	1.39093	0.665	0.351	0	ENSBTAG00000025385	mural TE
0	1.2968	0.565	0.322	0	ENSBTAG00000023792	mural TE
0	1.45695	0.693	0.358	0	ENSBTAG00000016347	mural TE
0	1.24474	0.933	0.655	0	ENO1	mural TE
0	1.50036	0.527	0.322	0	ELOC	mural TE
0	1.3297	0.62	0.391	0	ELOB	mural TE
0	1.23603	0.784	0.468	0	EIF5A	mural TE
0	0.726641	0.621	0.517	0	EIF5	mural TE
0	1.46703	0.948	0.672	0	EIF4A1	mural TE
0	1.56501	0.606	0.344	0	EIF3M	mural TE
0	1.25039	0.604	0.388	0	EIF3K	mural TE
0	1.73157	0.52	0.285	0	EIF3J	mural TE
0	1.48661	0.624	0.35	0	EIF3G	mural TE
0	1.62036	0.779	0.465	0	EIF2S2	mural TE
0	1.64833	0.731	0.391	0	EIF1AX	mural TE
0	1.38395	0.888	0.56	0	EIF1	mural TE
0	0.852676	0.929	0.674	0	EEF1G	mural TE
0	1.44633	0.899	0.544	0	EEF1D	mural TE
0	1.34158	0.869	0.527	0	EEF1B2	mural TE
0	0.635271	0.981	0.766	0	EEF1A1	mural TE
0	1.94631	0.858	0.428	0	DYNLL1	mural TE
0	1.00082	0.531	0.373	0	DUT	mural TE
0	2.76068	0.655	0.117	0	DNASE1L3	mural TE
0	0.75678	0.561	0.422	0	DNAJA1	mural TE
0	1.19559	0.602	0.397	0	DKC1	mural TE
0	2.07883	0.736	0.362	0	DDX21	mural TE
0	1.83293	0.692	0.334	0	DDT	mural TE
0	0.789705	0.759	0.558	0	DBI	mural TE
0	0.975836	0.652	0.461	0	DAD1	mural TE
0	0.880039	0.666	0.443	0	DAB2	mural TE
0	2.40071	0.901	0.389	0	CYCS	mural TE
0	1.34575	0.717	0.425	0	CYC1	mural TE
0	1.26922	0.912	0.561	0	CSTB.1	mural TE
0	1.8121	0.836	0.396	0	CSRP2	mural TE
0	1.44172	0.77	0.45	0	COX8A	mural TE
0	1.78568	0.748	0.398	0	COX7B	mural TE
0	1.49488	0.577	0.32	0	COX7A2L	mural TE
0	1.67316	0.921	0.528	0	COX7A2	mural TE
0	1.20151	0.788	0.54	0	COX6C	mural TE
0	1.30187	0.776	0.442	0	COX6B1	mural TE
0	1.51724	0.854	0.493	0	COX6A1	mural TE
0	1.38583	0.862	0.497	0	COX5B	mural TE
0	1.44105	0.809	0.457	0	COX5A	mural TE
0	0.868115	0.871	0.642	0	COX4I1	mural TE
0	0.65477	0.999	0.754	0	COX3	mural TE
0	0.613632	0.997	0.708	0	COX2	mural TE
0	1.23489	0.609	0.371	0	COPS9	mural TE
0	1.61955	0.572	0.304	0	COA3	mural TE
0	1.20136	0.572	0.381	0	CNBP	mural TE
0	1.58733	0.893	0.58	0	CLTA	mural TE
0	2.36239	0.973	0.48	0	CLIC1	mural TE
0	0.758846	0.572	0.353	0	CLDN6	mural TE
0	1.67886	0.596	0.306	0	CKS2	mural TE
0	2.09191	0.514	0.233	0	CISD1	mural TE
0	1.4108	0.809	0.47	0	CHCHD2	mural TE
0	1.53505	0.683	0.344	0	CHCHD10	mural TE
0	0.755758	0.823	0.574	0	CFL1	mural TE
0	1.02156	0.637	0.464	0	CCT8	mural TE
0	1.21079	0.516	0.346	0	CCT6A	mural TE
0	1.50549	0.61	0.344	0	CCT5	mural TE
0	1.0588	0.629	0.463	0	CCT4	mural TE
0	1.04111	0.607	0.43	0	CCT3	mural TE
0	1.2667	0.687	0.463	0	CCT2	mural TE
0	0.793802	0.803	0.48	0	CALML5	mural TE
[truncated: 9,086 more rows]

## Sheet: S5
Supplementary Data 4. The number of genes shared among the top 50 marker genes between pigs and humans or mice
Trophoblast subtypes of cow	Trophoblast subtypes of humans (Vento-Tormo et al., Nature,2018;Tsang et al.,PNAS, 2017; Marsh et al., eLife, 2022)	The genes shared among the top 50 marker genes		Trophoblast subtypes of cow	Trophoblast subtypes of mice (Marsh B and Blelloch R, eLife, 2020)	The genes shared among the top 50 marker genes		Trophoblast subtypes of cow	Trophoblast subtypes of macaca	Trophoblast subtypes	The genes shared among the top 50 marker genes
	first trimester (Vento-Tormo et al., Nature,2018)			Tro_B5	17 SpA-TGC			Tro_B5	CTB	of macaca
Tro_B5	VCT				11 Secondary P-TGC				STB	Syncytiotrophoblast
	EVT				16 Gly-T	SPATA21，GPAT3			EVT	Extravillous trophoblast cells
	SCT				15 SpT				XTB	Trophoblast like cells
Tro_B6	VCT				9 S-TGC			Tro_B6	CTB	Cytotrophoblast cells	CLDN3
	EVT				2 LaTP				STB	Syncytiotrophoblast
	SCT				7 S-TGC Precursor				EVT	Extravillous trophoblast cells	IGFBP3
IFNT+Tro1	VCT	PKIB			8 S-TGC Precursor				XTB	Trophoblast like cells	CLDN3
	EVT				5 SynTI Precursor			IFNT+Tro1	CTB	Cytotrophoblast cells	LRP2
	SCT				1 TSC and ExE cell	DNMT3B			STB	Syncytiotrophoblast	BASP1,SLC7A4
IFNT+Tro2	VCT	AKR1B1			12 Secondary P-TGC Precursor				EVT	Extravillous trophoblast cells
	EVT				13 EPC cell				XTB	Trophoblast like cells	LRP2,PKIB,SLC7A4
	SCT				18 EPC Migratory Cell	SPATA21		IFNT+Tro2	CTB	Cytotrophoblast cells
Tro_B3	VCT				4 SynTI Precursor				STB	Syncytiotrophoblast	TMSB10,SLC7A4
	EVT				14 SpT				EVT	Extravillous trophoblast cells
	SCT				6 S-TGC Precursor				XTB	Trophoblast like cells	SLC7A4
Tro_B4	VCT				10 Primary P-TGC			Tro_B3	CTB	Cytotrophoblast cells
	EVT	TFPI,ADM			19 SynTII Precursor				STB	Syncytiotrophoblast
	SCT				3 LaTP 2				EVT	Extravillous trophoblast cells
Tro_U1	VCT	PHLDA2,PAGE4		Tro_B6	17 SpA-TGC	ADA			XTB	Trophoblast like cells
	EVT	CDKN1C			11 Secondary P-TGC			Tro_B4	CTB	Cytotrophoblast cells
	SCT	PHLDA2,CDKN1C,SLC40A1			16 Gly-T	ADA			STB	Syncytiotrophoblast	SERPINB9
Tro_U2	VCT	PAGE4,PHLDA2,AKR1B1			15 SpT				EVT	Extravillous trophoblast cells
	EVT	CDKN1C,IGF2			9 S-TGC				XTB	Trophoblast like cells	SERPINB9
	SCT	PHLDA2,CDKN1C			2 LaTP	CLDN3		Tro_U1	CTB	Cytotrophoblast cells	PAGE4,PHLDA2,SLC40A1
Tro_U3	VCT				7 S-TGC Precursor				STB	Syncytiotrophoblast	PHLDA2,CDKN1C
	EVT				8 S-TGC Precursor	BRD3			EVT	Extravillous trophoblast cells	CDKN1C
	SCT				5 SynTI Precursor	GJB2，TFRC			XTB	Trophoblast like cells
Tro_U4	VCT	PEG3			1 TSC and ExE cell	CLDN3		Tro_U2	CTB	Cytotrophoblast cells	PAGE4,PHLDA2
	EVT				12 Secondary P-TGC Precursor				STB	Syncytiotrophoblast	PHLDA2,CDKN1C,REXO2
	SCT	HSD3B1			13 EPC cell				EVT	Extravillous trophoblast cells	CDKN1C
Tro_B2	VCT				18 EPC Migratory Cell				XTB	Trophoblast like cells	S100A11
	EVT				4 SynTI Precursor	TFRC		Tro_U3	CTB	Cytotrophoblast cells
	SCT				14 SpT				STB	Syncytiotrophoblast
Tro_B1	VCT	MGST3			6 S-TGC Precursor				EVT	Extravillous trophoblast cells
	EVT				10 Primary P-TGC				XTB	Trophoblast like cells
	SCT				19 SynTII Precursor			Tro_U4	CTB	Cytotrophoblast cells	FOXO4
mural_TE	VCT	KRT18			3 LaTP 2	TFRC，CLDN3，RCC2			STB	Syncytiotrophoblast
	EVT	ASCL2,KRT18		IFNT+Tro1	17 SpA-TGC				EVT	Extravillous trophoblast cells
	SCT	KRT18,HSD17B1			11 Secondary P-TGC	CAPG			XTB	Trophoblast like cells
polar	VCT	KRT18			16 Gly-T			Tro_B2	CTB	Cytotrophoblast cells
	EVT	ASCL2,KRT18			15 SpT				STB	Syncytiotrophoblast
	SCT	CGA,KRT18,HSD17B1			9 S-TGC				EVT	Extravillous trophoblast cells
					2 LaTP				XTB	Trophoblast like cells
	second trimester( Marsh et al., eLife, 2022)				7 S-TGC Precursor			Tro_B1	CTB	Cytotrophoblast cells
Tro_B5	CTB1_int				8 S-TGC Precursor				STB	Syncytiotrophoblast
	CTB2_int				5 SynTI Precursor	SLC16A1			EVT	Extravillous trophoblast cells
	CTB_EVT_int				1 TSC and ExE cell				XTB	Trophoblast like cells
	EVT1_int				12 Secondary P-TGC Precursor			mural_TE	CTB	Cytotrophoblast cells
	EVT2_int				13 EPC cell	PABPC1			STB	Syncytiotrophoblast
	EVT3_int				18 EPC Migratory Cell				EVT	Extravillous trophoblast cells
	EVT4_int				4 SynTI Precursor				XTB	Trophoblast like cells	KRT18
	EVT5_int				14 SpT			polar	CTB	Cytotrophoblast cells	CGA,LRP2
	STB_like_int				6 S-TGC Precursor				STB	Syncytiotrophoblast	CGA
	CTB_S-phase_int				10 Primary P-TGC	PABPC1			EVT	Extravillous trophoblast cells
	CTB_G2M-phase_int				19 SynTII Precursor				XTB	Trophoblast like cells	KRT18,LRP2
Tro_B6	CTB1_int				3 LaTP 2
	CTB2_int			IFNT+Tro2	17 SpA-TGC
	CTB_EVT_int				11 Secondary P-TGC	ARHGDIB，CAPG
	EVT1_int				16 Gly-T
	EVT2_int				15 SpT	PFN1
	EVT3_int	IGFBP3			9 S-TGC
	EVT4_int				2 LaTP	CLDN6
	EVT5_int				7 S-TGC Precursor
	STB_like_int	TFRC			8 S-TGC Precursor
	CTB_S-phase_int	GGCT			5 SynTI Precursor	FABP5
	CTB_G2M-phase_int				1 TSC and ExE cell	CLDN6
IFNT+Tro1	CTB1_int	PKIB,LRP2			12 Secondary P-TGC Precursor	PFN1
	CTB2_int				13 EPC cell	TMSB10，PFN1
	CTB_EVT_int				18 EPC Migratory Cell
	EVT1_int				4 SynTI Precursor	FABP5
	EVT2_int				14 SpT	PFN1
	EVT3_int				6 S-TGC Precursor
	EVT4_int				10 Primary P-TGC
	EVT5_int				19 SynTII Precursor	CLDN6
	STB_like_int	PKIB			3 LaTP 2
	CTB_S-phase_int			Tro_B3	17 SpA-TGC
	CTB_G2M-phase_int				11 Secondary P-TGC
IFNT+Tro2	CTB1_int				16 Gly-T
	CTB2_int				15 SpT
	CTB_EVT_int				9 S-TGC
	EVT1_int				2 LaTP
	EVT2_int				7 S-TGC Precursor
	EVT3_int				8 S-TGC Precursor
	EVT4_int				5 SynTI Precursor
	EVT5_int				1 TSC and ExE cell
	STB_like_int				12 Secondary P-TGC Precursor
	CTB_S-phase_int				13 EPC cell
	CTB_G2M-phase_int				18 EPC Migratory Cell
Tro_B3	CTB1_int				4 SynTI Precursor
	CTB2_int				14 SpT
	CTB_EVT_int				6 S-TGC Precursor
	EVT1_int				10 Primary P-TGC
	EVT2_int				19 SynTII Precursor
	EVT3_int				3 LaTP 2
	EVT4_int			Tro_B4	17 SpA-TGC
	EVT5_int				11 Secondary P-TGC	ADM
	STB_like_int				16 Gly-T
	CTB_S-phase_int				15 SpT
	CTB_G2M-phase_int				9 S-TGC
Tro_B4	CTB1_int				2 LaTP
	CTB2_int				7 S-TGC Precursor
	CTB_EVT_int				8 S-TGC Precursor
	EVT1_int				5 SynTI Precursor
	EVT2_int	ADM			1 TSC and ExE cell
	EVT3_int	TFPI			12 Secondary P-TGC Precursor
	EVT4_int				13 EPC cell
	EVT5_int				18 EPC Migratory Cell
	STB_like_int				4 SynTI Precursor
	CTB_S-phase_int				14 SpT
	CTB_G2M-phase_int				6 S-TGC Precursor
Tro_U1	CTB1_int	PAGE4,PHLDA2			10 Primary P-TGC	ADM
	CTB2_int	TGM2,MME			19 SynTII Precursor
	CTB_EVT_int				3 LaTP 2
	EVT1_int	CDKN1C		Tro_U1	17 SpA-TGC	CITED1
	EVT2_int	CDKN1C			11 Secondary P-TGC
	EVT3_int	CDKN1C,PHLDA2			16 Gly-T
	EVT4_int	IGFBP5			15 SpT	CDKN1C
	EVT5_int				9 S-TGC	CITED1
	STB_like_int	SLC40A1			2 LaTP	IRX4
	CTB_S-phase_int	PAGE4			7 S-TGC Precursor	CDKN1C
	CTB_G2M-phase_int	PAGE4			8 S-TGC Precursor	TGM2
Tro_U2	CTB1_int	PAGE4,PHLDA2			5 SynTI Precursor	B2M，CDKN1C
	CTB2_int				1 TSC and ExE cell
	CTB_EVT_int				12 Secondary P-TGC Precursor	CTSL
	EVT1_int	CDKN1C			13 EPC cell
	EVT2_int	CDKN1C			18 EPC Migratory Cell
	EVT3_int	CDKN1C,PHLDA2			4 SynTI Precursor	PHLDA2
	EVT4_int				14 SpT
	EVT5_int				6 S-TGC Precursor
	STB_like_int				10 Primary P-TGC
	CTB_S-phase_int	PAGE4			19 SynTII Precursor
	CTB_G2M-phase_int	PAGE4			3 LaTP 2	PHLDA2
Tro_U3	CTB1_int			Tro_U2	17 SpA-TGC	CITED1
	CTB2_int				11 Secondary P-TGC	ARHGDIB，S100A11
	CTB_EVT_int	VGLL3			16 Gly-T	VIM
	EVT1_int				15 SpT	CDKN1C
	EVT2_int				9 S-TGC	CITED1
	EVT3_int				2 LaTP
	EVT4_int				7 S-TGC Precursor	CDKN1C
	EVT5_int	CENPF,MAD2L1			8 S-TGC Precursor
	STB_like_int				5 SynTI Precursor	B2M，ATP6V0D1，CDKN1C
	CTB_S-phase_int	DIAPH3,ANLN			1 TSC and ExE cell
	CTB_G2M-phase_int	CENPF,ANLN			12 Secondary P-TGC Precursor	CTSL，CD63
Tro_U4	CTB1_int	PEG3,FOXO4			13 EPC cell
	CTB2_int	HSD3B1			18 EPC Migratory Cell	COL3A1
	CTB_EVT_int				4 SynTI Precursor	PHLDA2
	EVT1_int	LTBP1			14 SpT
	EVT2_int				6 S-TGC Precursor
	EVT3_int				10 Primary P-TGC
	EVT4_int				19 SynTII Precursor
	EVT5_int				3 LaTP 2	PHLDA2
	STB_like_int	PEG3		Tro_U3	17 SpA-TGC
	CTB_S-phase_int				11 Secondary P-TGC
	CTB_G2M-phase_int				16 Gly-T
Tro_B2	CTB1_int				15 SpT
	CTB2_int				9 S-TGC	ZMAT1
	CTB_EVT_int				2 LaTP
	EVT1_int				7 S-TGC Precursor
	EVT2_int				8 S-TGC Precursor
	EVT3_int				5 SynTI Precursor
	EVT4_int	DKK1,THY1			1 TSC and ExE cell
	EVT5_int				12 Secondary P-TGC Precursor
	STB_like_int				13 EPC cell
	CTB_S-phase_int				18 EPC Migratory Cell
	CTB_G2M-phase_int				4 SynTI Precursor	VGLL3
Tro_B1	CTB1_int	MGST3			14 SpT
	CTB2_int				6 S-TGC Precursor
	CTB_EVT_int				10 Primary P-TGC
	EVT1_int				19 SynTII Precursor
	EVT2_int				3 LaTP 2
	EVT3_int			Tro_U4	17 SpA-TGC	FOXO4
	EVT4_int	THY1			11 Secondary P-TGC
	EVT5_int				16 Gly-T	GNA14
	STB_like_int				15 SpT
	CTB_S-phase_int				9 S-TGC	ZMAT1
	CTB_G2M-phase_int				2 LaTP
mural_TE	CTB1_int	HSD17B1			7 S-TGC Precursor
	CTB2_int	KRT18			8 S-TGC Precursor
	CTB_EVT_int				5 SynTI Precursor
	EVT1_int	ASCL2			1 TSC and ExE cell
	EVT2_int				12 Secondary P-TGC Precursor
	EVT3_int	ASCL2			13 EPC cell
	EVT4_int				18 EPC Migratory Cell
	EVT5_int				4 SynTI Precursor
	STB_like_int	HSD17B1			14 SpT
	CTB_S-phase_int				6 S-TGC Precursor
	CTB_G2M-phase_int				10 Primary P-TGC
polar_TE	CTB1_int	HSD17B1,LRP2			19 SynTII Precursor
	CTB2_int	KRT18			3 LaTP 2
	CTB_EVT_int			Tro_B2	17 SpA-TGC
	EVT1_int	ASCL2			11 Secondary P-TGC
	EVT2_int				16 Gly-T
	EVT3_int	ASCL2			15 SpT
	EVT4_int				9 S-TGC
	EVT5_int				2 LaTP
	STB_like_int	CGA,HSD17B1			7 S-TGC Precursor
	CTB_S-phase_int				8 S-TGC Precursor	LIMD2
	CTB_G2M-phase_int				5 SynTI Precursor
					1 TSC and ExE cell
	third trimester(Tsang et al.,PNAS, 2017)				12 Secondary P-TGC Precursor
Tro_B5	Cytotrophoblast				13 EPC cell
	Extravillous trophoblast				18 EPC Migratory Cell
	Syncytiotrophoblast				4 SynTI Precursor	RAC3
Tro_B6	Cytotrophoblast				14 SpT
	Extravillous trophoblast				6 S-TGC Precursor
	Syncytiotrophoblast	BPGM			10 Primary P-TGC
IFNT+Tro1	Cytotrophoblast	PKIB			19 SynTII Precursor
	Extravillous trophoblast				3 LaTP 2
	Syncytiotrophoblast			Tro_B1	17 SpA-TGC
IFNT+Tro2	Cytotrophoblast				11 Secondary P-TGC
	Extravillous trophoblast	ARHGDIB			16 Gly-T
	Syncytiotrophoblast				15 SpT
Tro_B3	Cytotrophoblast				9 S-TGC
	Extravillous trophoblast				2 LaTP
	Syncytiotrophoblast				7 S-TGC Precursor
Tro_B4	Cytotrophoblast				8 S-TGC Precursor	LIMD2
	Extravillous trophoblast	ADM			5 SynTI Precursor
	Syncytiotrophoblast				1 TSC and ExE cell	POU3F1
Tro_U1	Cytotrophoblast	PAGE4,PHLDA2			12 Secondary P-TGC Precursor
	Extravillous trophoblast				13 EPC cell
	Syncytiotrophoblast				18 EPC Migratory Cell
Tro_U2	Cytotrophoblast	PAGE4,PHLDA2			4 SynTI Precursor	RAC3
	Extravillous trophoblast	IGF2,ARHGDIB			14 SpT
	Syncytiotrophoblast				6 S-TGC Precursor
Tro_U3	Cytotrophoblast				10 Primary P-TGC
	Extravillous trophoblast				19 SynTII Precursor
	Syncytiotrophoblast	FAR2			3 LaTP 2
Tro_U4	Cytotrophoblast			mural_TE	17 SpA-TGC
	Extravillous trophoblast				11 Secondary P-TGC	GLIPR2
	Syncytiotrophoblast				16 Gly-T
Tro_B2	Cytotrophoblast	FAR2,HSD3B1			15 SpT	ASCL2，LGALS3
	Extravillous trophoblast				9 S-TGC
	Syncytiotrophoblast				2 LaTP
Tro_B1	Cytotrophoblast	MGST3			7 S-TGC Precursor	CSRP2
	Extravillous trophoblast				8 S-TGC Precursor
	Syncytiotrophoblast				5 SynTI Precursor
mural_TE	Cytotrophoblast	HSD17B1			1 TSC and ExE cell	NOP10
	Extravillous trophoblast				12 Secondary P-TGC Precursor	ASCL2，PA2G4，NPM1
	Syncytiotrophoblast				13 EPC cell	ASCL2，TOMM5，NOP10
polar_TE	Cytotrophoblast	HSD17B1			18 EPC Migratory Cell
	Extravillous trophoblast				4 SynTI Precursor
	Syncytiotrophoblast	CGA			14 SpT	ASCL2，NPM1，C1QBP，DDX21
					6 S-TGC Precursor	NPM1
					10 Primary P-TGC	TOMM5
					19 SynTII Precursor
					3 LaTP 2
				polar_TE	17 SpA-TGC
					11 Secondary P-TGC
					16 Gly-T
					15 SpT	ASCL2
					9 S-TGC
					2 LaTP
					7 S-TGC Precursor
					8 S-TGC Precursor
					5 SynTI Precursor
					1 TSC and ExE cell
					12 Secondary P-TGC Precursor	ASCL2
					13 EPC cell	ASCL2
					18 EPC Migratory Cell
					4 SynTI Precursor
					14 SpT	ASCL2
					6 S-TGC Precursor
					10 Primary P-TGC
					19 SynTII Precursor
					3 LaTP 2
