# Supplementary material for: A longitudinal single-nucleus transcriptomic atlas of the bovine placenta reveals dynamic cellular hierarchies and regulatory networks during gestation
Source: Research Square preprint supplement (doi:10.21203/rs.3.rs-8046408/v1), 2025-11-26
Supplement: Supplementary file 2 [file 10adea331be1539661d8e980.xlsx]

## Sheet: Cow_HBC_stage_markers
Cow HBC stage markers
p_val	avg_log2FC	pct.1	pct.2	p_val_adj	cluster	gene
0	3.19333	0.898	0.007	0	E30	IFI27
0	3.02582	0.594	0.001	0	E30	ENSBTAG00000038921
0	3.01501	0.587	0	0	E30	HBE1
0	2.72469	0.721	0.022	0	E30	ISG15
0	2.57492	0.89	0.043	0	E30	MX1
0	2.31295	0.604	0.028	0	E30	ENSBTAG00000011961
0	2.07627	0.837	0.036	0	E30	OAS1Y
0	1.96283	0.82	0.071	0	E30	STMN1
0	1.72437	0.876	0.07	0	E30	COL3A1
0	1.39297	0.608	0.025	0	E30	MX2
0	1.27694	0.845	0.046	0	E30	KRT19
0	1.25852	0.746	0.023	0	E30	FABP3
0	1.23661	0.544	0.012	0	E30	CLEC4F
0	1.2017	0.717	0.035	0	E30	USP18
0	1.18879	0.671	0.026	0	E30	COL1A2
0	1.17162	0.862	0.075	0	E30	HMGA1
0	1.13439	0.717	0.007	0	E30	APOA1
0	1.07293	0.756	0.047	0	E30	TXNDC17
0	1.05137	0.431	0.004	0	E30	ENSBTAG00000053806
0	1.03008	0.583	0.012	0	E30	COL1A1
0	0.995365	0.569	0.015	0	E30	ENSBTAG00000045588
0	0.989699	0.792	0.056	0	E30	PSME2
0	0.909458	0.799	0.06	0	E30	ENSBTAG00000030305
0	0.88216	0.809	0.058	0	E30	NDUFA11
0	0.878328	0.76	0.05	0	E30	TIMM13
0	0.795807	0.565	0.021	0	E30	RBP4
0	0.735913	0.382	0.002	0	E30	CLEC4G
0	0.677451	0.466	0.002	0	E30	TKDP4
0	0.632218	0.657	0.026	0	E30	GSTO1
0	0.574069	0.668	0.034	0	E30	PDZD11
0	0.544016	0.523	0.004	0	E30	IFITM1
0	0.53918	0.594	0.023	0	E30	OAS1X
0	0.533862	0.615	0.028	0	E30	MRPL16
0	0.531056	0.583	0.022	0	E30	CALML4
0	0.458805	0.569	0.022	0	E30	CENPX
3.12342e-307	1.38281	0.845	0.075	6.05943e-303	E30	UNC119
1.01007e-306	3.45176	0.965	0.141	1.95953e-302	E30	IFI6
1.25961e-305	0.931737	0.77	0.056	2.44365e-301	E30	PAFAH1B3
1.85551e-305	1.08291	0.82	0.066	3.59969e-301	E30	RAB13
1.14035e-303	0.970078	0.795	0.061	2.21227e-299	E30	PSMB6
3.83434e-302	0.884064	0.77	0.057	7.43863e-298	E30	C1QBP
2.41645e-298	0.831856	0.721	0.048	4.68792e-294	E30	CTSL
5.17574e-298	0.584964	0.569	0.024	1.00409e-293	E30	DHX58
9.26959e-298	0.431691	0.551	0.022	1.7983e-293	E30	MRPS12
1.51767e-297	0.619078	0.431	0.008	2.94429e-293	E30	A2M
2.3073e-297	0.521706	0.671	0.039	4.47617e-293	E30	GRPEL1
5.84404e-297	0.787055	0.721	0.048	1.13374e-292	E30	CDK4
6.21737e-297	0.799114	0.777	0.059	1.20617e-292	E30	MRPL11
5.72339e-296	0.762272	0.689	0.043	1.11034e-291	E30	IGF2BP1
7.88691e-296	0.62775	0.668	0.039	1.53006e-291	E30	TRMT112
5.91741e-290	0.782801	0.625	0.034	1.14798e-285	E30	DTYMK
9.7113e-290	0.832024	0.739	0.055	1.88399e-285	E30	ASIP
2.3326e-285	0.740642	0.636	0.036	4.52524e-281	E30	IRF7
2.17661e-284	1.1107	0.834	0.078	4.22262e-280	E30	RPL22L1
2.0357e-281	1.21018	0.855	0.085	3.94925e-277	E30	NDUFB11
6.55459e-281	0.699776	0.739	0.056	1.27159e-276	E30	MRPL54
2.03976e-280	0.642657	0.714	0.05	3.95713e-276	E30	BANF1
2.79453e-280	0.603299	0.668	0.043	5.42139e-276	E30	ECHS1
3.60769e-279	1.03265	0.565	0.029	6.99891e-275	E30	SPC24
7.72774e-279	0.503549	0.668	0.042	1.49918e-274	E30	SNAPIN
8.411e-279	0.627078	0.71	0.05	1.63173e-274	E30	DPY30
5.36287e-278	0.958215	0.792	0.068	1.0404e-273	E30	NHERF1
1.09433e-277	1.72766	0.894	0.107	2.12301e-273	E30	ENSBTAG00000016347
3.40187e-277	0.317357	0.385	0.006	6.59963e-273	E30	S100A5
5.62131e-277	0.753113	0.724	0.054	1.09053e-272	E30	APEX1
1.20422e-276	0.501313	0.537	0.024	2.33618e-272	E30	RNASEH2A
1.31248e-276	0.48789	0.611	0.034	2.5462e-272	E30	UXT
1.4385e-276	0.307148	0.41	0.009	2.79069e-272	E30	ENSBTAG00000050435
2.30611e-276	1.38368	0.325	0.002	4.47386e-272	E30	NDUFA4L2
2.8095e-276	0.48215	0.629	0.037	5.45044e-272	E30	FSCN1
3.72016e-276	0.343585	0.41	0.009	7.2171e-272	E30	PRSS2
5.57266e-276	0.582369	0.696	0.048	1.0811e-271	E30	LSM7
4.97078e-275	0.960532	0.813	0.074	9.64332e-271	E30	PSMB8
8.38151e-273	0.545919	0.657	0.042	1.62601e-268	E30	YIF1B
1.87842e-271	1.59773	0.809	0.078	3.64414e-267	E30	CKB
1.78628e-270	0.344881	0.343	0.003	3.46537e-266	E30	ZBP1
1.49524e-269	0.839533	0.784	0.068	2.90077e-265	E30	NUTF2
2.29509e-269	1.16743	0.83	0.08	4.45247e-265	E30	ENSBTAG00000025385
2.84758e-269	0.911253	0.862	0.085	5.5243e-265	E30	SMDT1
4.3005e-269	0.35303	0.502	0.02	8.34297e-265	E30	ENSBTAG00000038438
5.81017e-269	0.298454	0.311	0.001	1.12717e-264	E30	ENSBTAG00000019017
2.92666e-268	0.752046	0.802	0.071	5.67772e-264	E30	PAICS
1.55134e-267	0.409434	0.565	0.029	3.0096e-263	E30	TRAPPC1
1.67007e-267	0.960494	0.742	0.062	3.23994e-263	E30	CYCS
3.53969e-267	1.09004	0.774	0.07	6.867e-263	E30	BGN
6.08809e-267	0.507132	0.382	0.007	1.18109e-262	E30	ISG12(B)
8.91911e-267	1.20667	0.823	0.078	1.73031e-262	E30	FOS
4.56279e-266	1.22824	0.855	0.091	8.85181e-262	E30	VAT1
1.18585e-265	0.517454	0.671	0.046	2.30054e-261	E30	PRPS1
1.33733e-264	1.35326	0.601	0.037	2.59442e-260	E30	SEMA3A
4.53372e-263	0.58938	0.399	0.009	8.79542e-259	E30	SERPINB8
2.20435e-262	0.855365	0.792	0.073	4.27645e-258	E30	SF3B5
2.77758e-262	0.796909	0.703	0.055	5.38851e-258	E30	LSM4
4.03585e-262	0.347811	0.481	0.018	7.82955e-258	E30	NHP2
4.06295e-261	0.564388	0.696	0.052	7.88211e-257	E30	CNP
1.22857e-260	0.55338	0.555	0.029	2.38343e-256	E30	PSMB9
1.29104e-260	0.825871	0.767	0.068	2.50462e-256	E30	TOMM5
4.29938e-260	0.371173	0.445	0.015	8.3408e-256	E30	TMEM35B
5.15439e-259	1.42074	0.89	0.107	9.99953e-255	E30	ATP5IF1
2.01662e-258	0.845385	0.795	0.074	3.91224e-254	E30	NDUFA13
5.24272e-258	0.812155	0.777	0.07	1.01709e-253	E30	FBL
1.07791e-257	0.495475	0.537	0.027	2.09114e-253	E30	SOCS2
3.18514e-257	0.92036	0.841	0.087	6.17916e-253	E30	PTPN18
3.27896e-257	0.664889	0.71	0.056	6.36119e-253	E30	C19H17orf49
4.43077e-256	0.735133	0.767	0.069	8.59569e-252	E30	MRPS26
1.35654e-255	0.283531	0.445	0.015	2.63168e-251	E30	HIGD2A
2.80283e-255	0.456601	0.608	0.038	5.43749e-251	E30	MIEN1
4.41671e-255	0.317606	0.431	0.014	8.56841e-251	E30	DCTPP1
8.41685e-255	1.19197	0.845	0.093	1.63287e-250	E30	ATP6V1F
1.489e-254	0.552902	0.594	0.036	2.88866e-250	E30	RNASEH2C
2.92044e-254	0.442184	0.611	0.039	5.66565e-250	E30	ENSBTAG00000047029
8.27564e-254	1.00674	0.823	0.085	1.60547e-249	E30	PSMB5
1.58495e-253	1.08345	0.813	0.083	3.0748e-249	E30	RANBP1
7.46592e-253	0.668	0.696	0.055	1.44839e-248	E30	FKBP3
1.7026e-252	0.60222	0.753	0.065	3.30304e-248	E30	TIMM17B
4.3234e-252	0.781589	0.742	0.065	8.38739e-248	E30	ATP5MC1
5.42648e-252	0.502546	0.629	0.043	1.05274e-247	E30	ENSBTAG00000018987
1.2348e-251	1.17843	0.834	0.092	2.39551e-247	E30	ATP5PF
1.59337e-251	0.935674	0.834	0.088	3.09114e-247	E30	UQCRFS1
3.51035e-251	0.687266	0.753	0.066	6.81009e-247	E30	CMTM3
5.64669e-251	1.24458	0.657	0.051	1.09546e-246	E30	CKS2
1.78018e-250	0.436178	0.509	0.024	3.45354e-246	E30	ARL2
2.24301e-250	0.873019	0.463	0.019	4.35143e-246	E30	BoLA
2.31357e-250	0.809501	0.753	0.067	4.48833e-246	E30	LIN28B
3.38885e-250	0.494358	0.654	0.047	6.57437e-246	E30	PBDC1
4.50232e-250	1.18851	0.894	0.104	8.7345e-246	E30	SERPINH1
1.21634e-249	0.33414	0.466	0.019	2.35971e-245	E30	ENSBTAG00000005495
2.55612e-249	0.425137	0.495	0.023	4.95886e-245	E30	UBA7
2.7298e-249	1.43358	0.869	0.108	5.29581e-245	E30	SNRPD1
7.72363e-249	0.656416	0.746	0.066	1.49838e-244	E30	ADI1
1.33944e-248	0.276471	0.399	0.011	2.59852e-244	E30	ENSBTAG00000033806
4.2254e-248	0.640088	0.548	0.031	8.19728e-244	E30	ND6
6.59898e-248	0.787149	0.735	0.066	1.2802e-243	E30	LSM3
9.69232e-248	0.551831	0.717	0.06	1.88031e-243	E30	YBEY
9.84276e-248	0.5876	0.512	0.025	1.9095e-243	E30	H2BC15
1.32678e-247	0.692491	0.735	0.064	2.57396e-243	E30	TOMM22
3.06627e-247	0.58029	0.675	0.052	5.94856e-243	E30	MRPL40
3.61225e-247	0.369606	0.512	0.025	7.00777e-243	E30	HSD17B10
7.55776e-247	0.523221	0.661	0.05	1.46621e-242	E30	ENSBTAG00000048386
1.77444e-246	0.753924	0.774	0.073	3.44241e-242	E30	PSMC3
1.69619e-245	0.490311	0.664	0.05	3.2906e-241	E30	DNPEP
7.98933e-245	0.78992	0.788	0.078	1.54993e-240	E30	MICOS13
1.9144e-244	1.03776	0.82	0.088	3.71393e-240	E30	EIF3F
4.50666e-244	0.413956	0.576	0.036	8.74292e-240	E30	RNF187
5.98786e-244	1.11135	0.802	0.086	1.16164e-239	E30	ENSBTAG00000047265
7.3977e-244	0.76939	0.756	0.071	1.43515e-239	E30	UQCC2
8.48073e-244	0.550147	0.686	0.055	1.64526e-239	E30	DNPH1
4.01041e-243	0.874455	0.781	0.078	7.78019e-239	E30	POLR2G
5.30344e-243	1.83279	0.975	0.144	1.02887e-238	E30	ND5
8.90772e-243	0.740215	0.763	0.072	1.7281e-238	E30	NDUFC1
3.09222e-242	1.08155	0.534	0.031	5.9989e-238	E30	WFDC2
3.57926e-242	0.282044	0.406	0.013	6.94376e-238	E30	PTRHD1
8.97316e-242	1.92868	0.919	0.142	1.74079e-237	E30	NME2
9.6601e-242	0.569447	0.696	0.058	1.87406e-237	E30	NDUFA8
1.198e-241	0.9035	0.813	0.085	2.32412e-237	E30	PHPT1
3.95243e-241	0.681172	0.735	0.066	7.66771e-237	E30	ENSBTAG00000004472
6.22691e-241	1.72841	0.883	0.116	1.20802e-236	E30	JSP.1
1.15173e-240	0.455085	0.654	0.05	2.23436e-236	E30	SMIM26
4.34555e-240	1.45666	0.908	0.126	8.43037e-236	E30	SAP18
9.67065e-240	0.449947	0.615	0.043	1.87611e-235	E30	MRPL53
1.13858e-239	1.09851	0.728	0.069	2.20885e-235	E30	PCNA
3.69296e-239	3.41536	0.841	0.122	7.16433e-235	E30	S100A4
5.53281e-239	1.5153	0.869	0.11	1.07337e-234	E30	ATP5MC2
1.18686e-238	0.351162	0.502	0.025	2.30251e-234	E30	SPR
1.4037e-238	0.407569	0.565	0.035	2.72318e-234	E30	POP7
3.14515e-238	0.486975	0.629	0.046	6.10159e-234	E30	PRXL2B
3.61945e-238	0.411359	0.58	0.038	7.02173e-234	E30	PTPMT1
9.7113e-238	0.614246	0.675	0.056	1.88399e-233	E30	SVBP
1.3559e-237	0.541692	0.625	0.046	2.63045e-233	E30	MRPL12
1.40666e-237	0.257302	0.36	0.008	2.72891e-233	E30	CISD3
2.80585e-237	0.751154	0.76	0.074	5.44335e-233	E30	NDUFB5
4.35831e-237	1.37346	0.841	0.101	8.45512e-233	E30	DUT
4.48096e-237	0.356778	0.495	0.025	8.69306e-233	E30	CHRAC1
5.62894e-237	1.07993	0.834	0.096	1.09201e-232	E30	SNRPD2
6.82339e-237	0.414962	0.615	0.043	1.32374e-232	E30	MRPS21
1.90557e-236	0.448602	0.608	0.043	3.69681e-232	E30	ALKBH7
2.0048e-236	0.827256	0.809	0.086	3.8893e-232	E30	NDUFA2
2.62103e-236	0.406898	0.382	0.011	5.08479e-232	E30	ENSBTAG00000048353
2.66985e-236	0.584849	0.739	0.068	5.17952e-232	E30	DDT
1.53912e-235	1.57927	0.873	0.122	2.98589e-231	E30	COX5B
1.80874e-235	1.62884	0.88	0.127	3.50896e-231	E30	LAMTOR2
2.20998e-235	0.983706	0.604	0.044	4.28736e-231	E30	UCP2
3.58576e-235	1.49798	0.88	0.123	6.95636e-231	E30	LDHB
6.37246e-235	1.03349	0.816	0.093	1.23626e-230	E30	ALYREF
6.88937e-235	0.907824	0.76	0.076	1.33654e-230	E30	MAGED2
6.97792e-235	1.38365	0.869	0.116	1.35372e-230	E30	ERH
8.16036e-235	1.4958	0.908	0.123	1.58311e-230	E30	AKR1B1
9.77428e-235	0.785439	0.767	0.077	1.89621e-230	E30	NDUFA1
1.28292e-234	0.334221	0.456	0.02	2.48886e-230	E30	TMED3
1.58123e-234	0.456403	0.572	0.037	3.06758e-230	E30	CDK2AP2
2.04847e-234	0.366822	0.611	0.044	3.97402e-230	E30	BAG1
2.26996e-234	0.485009	0.647	0.05	4.40373e-230	E30	PHF5A
2.46048e-234	0.547709	0.739	0.068	4.77333e-230	E30	POLR2E
3.02224e-234	0.577599	0.693	0.06	5.86315e-230	E30	DGCR6L
3.74795e-234	0.692911	0.682	0.059	7.27103e-230	E30	MRPL20
1.44205e-233	0.754091	0.76	0.075	2.79758e-229	E30	UQCRQ
1.61962e-233	1.22549	0.841	0.102	3.14207e-229	E30	PEBP1
3.33141e-233	0.335009	0.512	0.028	6.46294e-229	E30	IFITM3
3.41917e-233	0.854448	0.799	0.086	6.63318e-229	E30	ATP5MK
4.66025e-233	0.367845	0.555	0.035	9.04089e-229	E30	CD2BP2
4.919e-233	0.418168	0.502	0.027	9.54286e-229	E30	CENPS
7.28678e-233	0.351484	0.505	0.027	1.41364e-228	E30	THYN1
1.53703e-232	0.618508	0.7	0.062	2.98184e-228	E30	MRPL57
4.59843e-232	2.32565	0.89	0.14	8.92096e-228	E30	MIF
5.2461e-232	0.505909	0.569	0.038	1.01774e-227	E30	RPA3
1.7421e-231	0.580829	0.71	0.064	3.37967e-227	E30	PSENEN
3.56365e-231	1.14935	0.866	0.108	6.91348e-227	E30	NDUFB10
1.26215e-230	0.369079	0.498	0.026	2.44858e-226	E30	TIFA
1.66183e-230	0.376209	0.64	0.049	3.22395e-226	E30	MRPS24
1.87017e-230	0.636036	0.548	0.035	3.62812e-226	E30	PDCD1
3.18515e-230	0.340905	0.445	0.019	6.17919e-226	E30	HIRIP3
5.60899e-230	0.597876	0.746	0.072	1.08814e-225	E30	COX14
5.66452e-230	0.72408	0.746	0.073	1.09892e-225	E30	COA3
7.25325e-230	0.419519	0.601	0.043	1.40713e-225	E30	EBNA1BP2
1.00345e-229	0.58456	0.678	0.058	1.94669e-225	E30	PRR13
1.95987e-229	0.418901	0.534	0.032	3.80215e-225	E30	PDLIM2
5.60806e-229	1.16349	0.883	0.116	1.08796e-224	E30	SNRPD3
9.69713e-229	0.441877	0.615	0.046	1.88124e-224	E30	MEA1
1.64944e-228	0.57466	0.707	0.064	3.19992e-224	E30	PFDN6
2.24458e-228	1.32892	0.82	0.102	4.35449e-224	E30	PLP2
3.40422e-228	0.564924	0.668	0.057	6.60418e-224	E30	CHCHD1
4.14398e-228	0.440283	0.548	0.035	8.03932e-224	E30	NXT1
4.67722e-228	0.795041	0.788	0.085	9.07381e-224	E30	BUD31
7.8382e-228	0.636323	0.767	0.077	1.52061e-223	E30	SNU13
1.16768e-227	0.601715	0.777	0.08	2.2653e-223	E30	MRPL9
1.35356e-227	0.63598	0.643	0.052	2.62591e-223	E30	S100A2
2.01964e-227	0.597439	0.753	0.074	3.91811e-223	E30	RAB11B
2.32706e-227	0.330319	0.463	0.022	4.5145e-223	E30	ENSBTAG00000052700
3.51486e-227	0.503341	0.689	0.061	6.81882e-223	E30	MLF2
3.58436e-227	0.752181	0.77	0.08	6.95366e-223	E30	CUTA
7.06336e-227	0.864751	0.82	0.094	1.37029e-222	E30	COX7A2L
1.14217e-226	0.415009	0.491	0.026	2.21581e-222	E30	BOLA3
1.58984e-226	0.767031	0.781	0.084	3.08429e-222	E30	COMMD4
2.61917e-226	0.668124	0.721	0.07	5.08119e-222	E30	PGLS
3.0965e-226	0.942063	0.777	0.084	6.00721e-222	E30	BLVRB
1.02117e-225	0.516242	0.654	0.055	1.98108e-221	E30	LSM2
1.35147e-225	0.382972	0.597	0.043	2.62185e-221	E30	NCBP2
2.65653e-225	0.52499	0.693	0.062	5.15367e-221	E30	NDUFV1
4.70853e-225	0.336603	0.459	0.022	9.13455e-221	E30	COX7A1
4.9436e-225	0.387606	0.565	0.038	9.59059e-221	E30	IFT20
5.16638e-225	0.740814	0.76	0.078	1.00228e-220	E30	NOP10
2.39761e-224	0.985068	0.703	0.066	4.65136e-220	E30	SPARC
2.66e-224	0.965701	0.841	0.102	5.16039e-220	E30	COX8A
3.90451e-224	0.544987	0.739	0.072	7.57476e-220	E30	NDUFB4
7.23991e-224	0.663832	0.756	0.077	1.40454e-219	E30	MAGOH
7.35456e-224	0.282815	0.3	0.004	1.42679e-219	E30	ENSBTAG00000032057
1.26379e-223	0.33739	0.353	0.009	2.45175e-219	E30	ENSBTAG00000050846
1.32952e-223	0.871305	0.799	0.09	2.57928e-219	E30	NPM1
2.20572e-223	0.676744	0.749	0.076	4.2791e-219	E30	POLR2F
2.64397e-223	0.331348	0.505	0.029	5.12929e-219	E30	ENSBTAG00000023274
2.64646e-223	0.351162	0.481	0.025	5.13413e-219	E30	ENSBTAG00000045937
3.32255e-223	0.452181	0.608	0.047	6.44576e-219	E30	CCDC59
3.38204e-223	1.21368	0.855	0.106	6.56116e-219	E30	PPDPF
5.42585e-223	0.747713	0.728	0.073	1.05261e-218	E30	MRPL17
9.81804e-223	0.908987	0.813	0.094	1.9047e-218	E30	NENF
2.08892e-222	0.400879	0.594	0.044	4.0525e-218	E30	PSMG3
3.18759e-222	0.454214	0.654	0.055	6.18393e-218	E30	NDUFB9
4.21321e-222	0.346047	0.548	0.036	8.17362e-218	E30	FDX2
4.78759e-222	0.658291	0.643	0.055	9.28792e-218	E30	EGFL7
7.86083e-222	0.666312	0.686	0.063	1.525e-217	E30	SCAND1
1.57284e-221	0.340703	0.495	0.028	3.05132e-217	E30	MRPL35
1.66996e-221	1.90862	0.898	0.152	3.23972e-217	E30	ATP5MC3
1.87225e-221	0.630174	0.671	0.06	3.63216e-217	E30	AP1S1
2.70802e-221	0.331729	0.484	0.026	5.25356e-217	E30	MYL9
2.74716e-221	0.496293	0.601	0.046	5.3295e-217	E30	FUNDC2
4.8493e-221	0.862293	0.816	0.095	9.40764e-217	E30	PSMB3
5.4527e-221	0.343082	0.276	0.002	1.05782e-216	E30	HOPX
1.19694e-220	1.30016	0.827	0.109	2.32207e-216	E30	RNF181
1.3893e-220	0.471957	0.601	0.046	2.69524e-216	E30	SLC25A4
5.10499e-220	0.328987	0.544	0.036	9.90369e-216	E30	MRPL34
5.18199e-220	0.813222	0.809	0.093	1.00531e-215	E30	NDUFA7
1.46987e-219	0.340345	0.523	0.032	2.85155e-215	E30	MRPL43
2.37993e-219	0.414841	0.576	0.042	4.61707e-215	E30	SMIM20
2.74112e-219	0.775767	0.774	0.084	5.31778e-215	E30	PIN1
5.06253e-219	1.08739	0.802	0.097	9.82131e-215	E30	SLC25A5
5.58098e-219	0.337486	0.512	0.031	1.08271e-214	E30	MRPS7
6.34125e-219	0.498922	0.608	0.048	1.2302e-214	E30	RSL1D1
9.51072e-219	0.64706	0.682	0.063	1.84508e-214	E30	TNFAIP8L2
2.20056e-218	0.772672	0.739	0.076	4.26908e-214	E30	ND4L
3.12539e-218	0.845112	0.827	0.098	6.06327e-214	E30	UQCR11
3.13398e-218	0.609834	0.509	0.032	6.07992e-214	E30	MCM5
4.22313e-218	0.668351	0.749	0.078	8.19288e-214	E30	FUOM
4.79431e-218	1.27818	0.792	0.098	9.30097e-214	E30	HPRT1
8.26933e-218	0.444031	0.643	0.054	1.60425e-213	E30	DRAP1
1.02935e-217	0.393534	0.647	0.055	1.99693e-213	E30	EMC6
1.344e-217	0.682343	0.774	0.084	2.60736e-213	E30	UBXN1
1.4794e-217	0.824017	0.792	0.09	2.87004e-213	E30	NDUFS6
3.60165e-217	0.522484	0.576	0.043	6.98721e-213	E30	CCN1
1.02671e-216	0.29795	0.459	0.024	1.99181e-212	E30	UBE2T
1.94212e-216	0.598694	0.717	0.071	3.7677e-212	E30	HNRNPA0
2.33602e-216	0.355771	0.488	0.028	4.53187e-212	E30	CCDC124
3.22894e-216	0.421692	0.558	0.04	6.26414e-212	E30	CCDC167
5.40553e-216	0.856759	0.837	0.101	1.04867e-211	E30	PSMG4
5.92339e-216	0.588179	0.76	0.08	1.14914e-211	E30	SDHD
7.49104e-216	0.778764	0.763	0.084	1.45326e-211	E30	FIS1
8.41881e-216	0.960054	0.813	0.1	1.63325e-211	E30	MRPL27
1.31459e-215	0.670756	0.657	0.059	2.5503e-211	E30	HERC5
2.59999e-215	0.73601	0.792	0.09	5.04397e-211	E30	TMEM147
2.81809e-215	1.90515	0.936	0.17	5.46709e-211	E30	HSPE1
2.92972e-215	0.401958	0.64	0.055	5.68366e-211	E30	SLC25A39
4.02181e-215	0.367198	0.576	0.043	7.80232e-211	E30	IMPA2
6.70175e-215	1.02057	0.845	0.11	1.30014e-210	E30	COPS9
7.33763e-215	0.437345	0.654	0.057	1.4235e-210	E30	PGRMC1
7.92683e-215	0.744902	0.82	0.096	1.5378e-210	E30	ATP5MJ
9.45867e-215	0.822806	0.816	0.096	1.83498e-210	E30	MRPS33
1.00638e-214	0.370079	0.512	0.032	1.95238e-210	E30	TREX1
1.00825e-214	0.276971	0.435	0.02	1.956e-210	E30	MRPL15
1.39878e-214	0.465363	0.622	0.052	2.71363e-210	E30	TIMM10
1.81739e-214	1.15392	0.594	0.05	3.52575e-210	E30	ANG2
3.62784e-214	1.20762	0.852	0.116	7.038e-210	E30	CALM3
4.72923e-214	1.27883	0.848	0.118	9.1747e-210	E30	ATP5PD
1.26738e-213	0.443842	0.555	0.04	2.45872e-209	E30	CKAP4
1.92124e-213	0.682497	0.806	0.093	3.7272e-209	E30	KARS1
2.26696e-213	0.812701	0.813	0.096	4.39791e-209	E30	PARK7
2.43477e-213	0.524869	0.654	0.058	4.72346e-209	E30	PAG11
1.66224e-212	0.413199	0.611	0.05	3.22474e-208	E30	ANAPC16
1.68035e-212	0.340343	0.562	0.041	3.25987e-208	E30	ENTREP2
6.30689e-212	0.91233	0.852	0.108	1.22354e-207	E30	SNRPC
6.60484e-212	1.21803	0.841	0.114	1.28134e-207	E30	PYCARD
1.14725e-211	0.688432	0.76	0.083	2.22566e-207	E30	PDCD5
1.62994e-211	0.892242	0.837	0.106	3.16208e-207	E30	UQCR10
1.63053e-211	0.290972	0.498	0.03	3.16322e-207	E30	CDC26
2.65166e-211	0.694762	0.721	0.074	5.14421e-207	E30	SERTAD1
2.66193e-211	1.51107	0.901	0.146	5.16414e-207	E30	EIF5A
2.6903e-211	0.794228	0.76	0.085	5.21918e-207	E30	CSNK2B
3.18831e-211	1.80476	0.908	0.165	6.18532e-207	E30	BTF3
4.81988e-211	1.15793	0.802	0.102	9.35057e-207	E30	TUBB
5.35941e-211	0.293272	0.484	0.028	1.03973e-206	E30	DNAJC19
5.46231e-211	0.617826	0.693	0.068	1.05969e-206	E30	AKR7A2
7.8562e-211	1.36385	0.88	0.132	1.5241e-206	E30	CHCHD2
8.88813e-211	0.412733	0.597	0.048	1.7243e-206	E30	POLR1D
8.91703e-211	0.830193	0.784	0.092	1.7299e-206	E30	BLOC1S1
9.49934e-211	0.739164	0.689	0.069	1.84287e-206	E30	IFIT5
2.10369e-210	4.14971	0.975	0.292	4.08117e-206	E30	VIM
2.71504e-210	0.372782	0.597	0.048	5.26717e-206	E30	LLPH
2.84827e-210	0.595128	0.746	0.079	5.52563e-206	E30	COX7B
6.33361e-210	0.42858	0.597	0.048	1.22872e-205	E30	SPCS1
6.50724e-210	0.732873	0.721	0.075	1.26241e-205	E30	ODC1
7.94312e-210	0.43581	0.636	0.056	1.54097e-205	E30	TXN2
9.02143e-210	1.01676	0.332	0.009	1.75016e-205	E30	TPPP3
1.23375e-209	1.15819	0.823	0.111	2.39347e-205	E30	COX6B1
1.74382e-209	0.29544	0.509	0.033	3.38301e-205	E30	GADD45GIP1
1.85701e-209	0.407989	0.565	0.043	3.6026e-205	E30	MTX1
2.29542e-209	0.39179	0.58	0.045	4.45312e-205	E30	PYCR3
4.20941e-209	0.331435	0.438	0.022	8.16626e-205	E30	GMPPB
4.89653e-209	0.522136	0.739	0.077	9.49927e-205	E30	PHB2
6.0766e-209	0.462135	0.671	0.063	1.17886e-204	E30	UBE2A
6.10048e-209	0.555362	0.329	0.008	1.18349e-204	E30	PARM1
6.23522e-209	0.363076	0.481	0.028	1.20963e-204	E30	KDELR3
6.31771e-209	0.911629	0.799	0.097	1.22564e-204	E30	MGST3
6.66316e-209	0.597789	0.717	0.073	1.29265e-204	E30	FOSB
6.6865e-209	1.02384	0.869	0.119	1.29718e-204	E30	ATP5F1D
8.77099e-209	0.564452	0.742	0.079	1.70157e-204	E30	NDUFA6
1.5956e-208	0.414837	0.608	0.051	3.09546e-204	E30	ARPC5L
2.149e-208	0.426232	0.629	0.055	4.16906e-204	E30	HMCES
3.47466e-208	0.4405	0.675	0.064	6.74083e-204	E30	RBM42
4.4352e-208	0.615647	0.739	0.079	8.60428e-204	E30	SRP14
5.89921e-208	0.48809	0.724	0.074	1.14445e-203	E30	RRAGA
1.02575e-207	0.512249	0.682	0.066	1.98996e-203	E30	MRPS16
1.19779e-207	0.428264	0.615	0.052	2.32372e-203	E30	MRPL51
1.20623e-207	0.497546	0.675	0.065	2.34009e-203	E30	TBCB
1.22964e-207	0.300724	0.413	0.019	2.38551e-203	E30	ENSBTAG00000047441
1.95516e-207	1.55587	0.89	0.147	3.79301e-203	E30	EIF1AX
2.41428e-207	0.707475	0.795	0.094	4.68369e-203	E30	KRTCAP2
2.79472e-207	1.51327	0.961	0.155	5.42176e-203	E30	JUND
5.10402e-207	0.535387	0.643	0.059	9.9018e-203	E30	RCN1
7.68886e-207	2.45157	0.958	0.232	1.49164e-202	E30	RPL12
1.13213e-206	1.53257	0.866	0.131	2.19633e-202	E30	H2AZ1
1.33839e-206	0.709818	0.82	0.1	2.59647e-202	E30	ERP29
2.42301e-206	1.16065	0.834	0.116	4.70064e-202	E30	MDH2
3.7992e-206	0.768959	0.813	0.099	7.37044e-202	E30	CWC15
4.32738e-206	0.369356	0.664	0.062	8.39511e-202	E30	METTL26
4.71488e-206	0.550118	0.551	0.041	9.14687e-202	E30	TYMS
5.56956e-206	0.359653	0.587	0.047	1.08049e-201	E30	ANAPC13
8.76987e-206	0.400529	0.601	0.05	1.70135e-201	E30	MZT2B
9.21296e-206	0.336516	0.502	0.032	1.78731e-201	E30	EMG1
1.31564e-205	0.843069	0.837	0.109	2.55233e-201	E30	LAMTOR5
1.62902e-205	0.580064	0.756	0.084	3.16029e-201	E30	QDPR
2.53624e-205	0.336721	0.509	0.034	4.9203e-201	E30	UQCC6
2.81999e-205	0.649776	0.763	0.087	5.47079e-201	E30	RPS4Y1
5.64676e-205	0.300768	0.484	0.03	1.09547e-200	E30	SIVA1
6.50221e-205	0.355336	0.509	0.034	1.26143e-200	E30	LYSET
6.9221e-205	0.886406	0.802	0.099	1.34289e-200	E30	ENSBTAG00000038330
7.77527e-205	0.595	0.703	0.073	1.5084e-200	E30	CDKN2AIPNL
7.81601e-205	1.02378	0.82	0.11	1.51631e-200	E30	PSME1
1.1443e-204	0.566322	0.548	0.042	2.21995e-200	E30	ECSCR
1.55862e-204	0.386355	0.587	0.048	3.02372e-200	E30	PAGR1
1.63068e-204	1.04201	0.816	0.108	3.16352e-200	E30	NDUFB8
2.07221e-204	0.347478	0.562	0.043	4.02008e-200	E30	SYF2
2.17555e-204	0.73477	0.735	0.082	4.22056e-200	E30	NAP1L1
2.388e-204	1.15295	0.855	0.124	4.63272e-200	E30	HINT1
3.18828e-204	2.62314	0.954	0.252	6.18526e-200	E30	SH3BGRL3
3.55008e-204	0.955076	0.636	0.062	6.88716e-200	E30	GLIPR2
4.30957e-204	0.726274	0.76	0.087	8.36056e-200	E30	PRDX6
7.068e-204	0.913638	0.834	0.111	1.37119e-199	E30	SF3B6
7.61836e-204	0.688091	0.76	0.087	1.47796e-199	E30	NDUFAB1
9.97266e-204	0.324442	0.541	0.04	1.9347e-199	E30	NAA38
1.31979e-203	0.315802	0.466	0.027	2.56039e-199	E30	NME6
2.99602e-203	0.279029	0.47	0.028	5.81228e-199	E30	MRPL55
5.38515e-203	0.44368	0.572	0.046	1.04472e-198	E30	MYADM
6.78624e-203	1.15839	0.862	0.125	1.31653e-198	E30	EDF1
1.45373e-202	0.563606	0.689	0.07	2.82023e-198	E30	NME1
1.83157e-202	0.29902	0.385	0.016	3.55324e-198	E30	GINS2
1.9534e-202	0.297025	0.534	0.038	3.78959e-198	E30	MPV17L2
2.18722e-202	1.07496	0.816	0.107	4.24321e-198	E30	UBE2S
3.04972e-202	1.88625	0.912	0.173	5.91645e-198	E30	SSR4
5.82385e-202	0.79846	0.565	0.046	1.12983e-197	E30	CAPG
1.16048e-201	0.328112	0.498	0.033	2.25133e-197	E30	C7H19orf53
1.39026e-201	1.98716	0.855	0.127	2.69711e-197	E30	DNAJB1
2.49039e-201	1.75897	0.954	0.18	4.83136e-197	E30	BOLA
4.22137e-201	0.792855	0.661	0.066	8.18945e-197	E30	PHLDA1
6.39755e-201	0.593681	0.703	0.074	1.24113e-196	E30	RAC2
1.25675e-200	0.256191	0.435	0.023	2.4381e-196	E30	TMEM203
1.39669e-200	0.255254	0.382	0.016	2.70958e-196	E30	GCHFR
1.48576e-200	0.357572	0.459	0.027	2.88237e-196	E30	GPX7
1.53857e-200	0.816777	0.813	0.103	2.98483e-196	E30	VPS28
2.02487e-200	0.353149	0.519	0.037	3.92824e-196	E30	NAA10
2.45897e-200	0.287955	0.509	0.035	4.77041e-196	E30	MRPS11
4.04477e-200	0.496642	0.675	0.067	7.84686e-196	E30	PRMT1
6.03411e-200	1.78541	0.837	0.132	1.17062e-195	E30	PLAC8B
1.21544e-199	3.20671	0.975	0.315	2.35794e-195	E30	B2M
1.51929e-199	0.634866	0.438	0.024	2.94743e-195	E30	BIRC5
4.11226e-199	2.38448	0.947	0.242	7.97778e-195	E30	PRDX1
5.26632e-199	0.989754	0.845	0.117	1.02167e-194	E30	RTRAF
5.82833e-199	0.284125	0.41	0.02	1.1307e-194	E30	COA4
8.79068e-199	0.329405	0.625	0.057	1.70539e-194	E30	NUDT16L1
1.65305e-198	0.270878	0.435	0.024	3.20692e-194	E30	MAGOHB
1.93631e-198	1.45149	0.876	0.143	3.75643e-194	E30	SEC61B
2.3508e-198	0.509909	0.519	0.038	4.56056e-194	E30	TUBB2A
2.51459e-198	0.574132	0.491	0.034	4.8783e-194	E30	SAT2
2.71144e-198	1.49951	0.905	0.154	5.26019e-194	E30	H2AZ2
2.71852e-198	0.605313	0.746	0.085	5.27393e-194	E30	EIF1B
3.21891e-198	0.97743	0.855	0.123	6.24469e-194	E30	VPS29
4.85417e-198	0.283525	0.41	0.02	9.41709e-194	E30	RAB34
5.23313e-198	2.23251	0.972	0.23	1.01523e-193	E30	RPL39
5.67701e-198	0.621428	0.731	0.082	1.10134e-193	E30	BUD23
5.87969e-198	0.287643	0.442	0.025	1.14066e-193	E30	FAM136A
7.70735e-198	0.368045	0.565	0.046	1.49523e-193	E30	NDUFB2
8.78232e-198	1.28742	0.848	0.13	1.70377e-193	E30	COX5A
1.90456e-197	0.57641	0.742	0.084	3.69485e-193	E30	TMEM160
2.4565e-197	1.89505	0.852	0.143	4.7656e-193	E30	GPX1
2.90026e-197	0.433676	0.597	0.052	5.6265e-193	E30	TMEM70
3.78821e-197	0.757385	0.816	0.105	7.34912e-193	E30	TMED4
5.32134e-197	0.337005	0.597	0.052	1.03234e-192	E30	SLC25A11
5.41661e-197	2.91967	0.943	0.242	1.05082e-192	E30	S100A10
5.54977e-197	1.23481	0.883	0.139	1.07666e-192	E30	AHCY
1.02846e-196	0.270537	0.523	0.038	1.99522e-192	E30	FAM241B
1.09694e-196	0.350412	0.572	0.047	2.12807e-192	E30	CRIPT
1.31406e-196	1.00903	0.707	0.08	2.54928e-192	E30	TUBA1A
1.94201e-196	0.401837	0.382	0.017	3.7675e-192	E30	CENPW
3.29427e-196	1.28262	0.912	0.151	6.39088e-192	E30	COX6A1
3.86279e-196	0.297835	0.583	0.049	7.49382e-192	E30	POLR2I
4.04506e-196	0.387441	0.597	0.053	7.84742e-192	E30	RPL26L1
5.53903e-196	0.331582	0.502	0.035	1.07457e-191	E30	EXOSC4
5.55494e-196	1.17161	0.912	0.144	1.07766e-191	E30	PRDX2
7.19607e-196	0.820478	0.813	0.106	1.39604e-191	E30	UQCRB
1.30969e-195	1.54405	0.901	0.164	2.5408e-191	E30	PPIA
2.20701e-195	0.452447	0.512	0.037	4.2816e-191	E30	SLC25A33
2.31877e-195	0.763566	0.799	0.101	4.49842e-191	E30	WDR83OS
2.57046e-195	0.493356	0.7	0.075	4.98669e-191	E30	RAD23A
2.87772e-195	4.295	0.392	0.02	5.58278e-191	E30	MT1A
2.96446e-195	1.42721	0.678	0.079	5.75106e-191	E30	CRIP1
6.26897e-195	1.15371	0.869	0.134	1.21618e-190	E30	ATP6V1G1
6.95317e-195	0.328242	0.608	0.055	1.34891e-190	E30	CUEDC2
7.84169e-195	0.508272	0.657	0.066	1.52129e-190	E30	REX1BD
9.02902e-195	2.80328	0.989	0.306	1.75163e-190	E30	RPLP0
9.50107e-195	0.689067	0.788	0.098	1.84321e-190	E30	ZNF706
1.33041e-194	0.389492	0.64	0.062	2.58099e-190	E30	CZIB
1.67774e-194	0.766636	0.767	0.094	3.25481e-190	E30	PHB1
1.71521e-194	2.03784	0.933	0.219	3.32752e-190	E30	CLIC1
1.90767e-194	0.295124	0.512	0.037	3.70088e-190	E30	CHCHD4
3.65574e-194	0.380586	0.618	0.057	7.09213e-190	E30	PCBP1
3.85212e-194	1.47762	0.869	0.136	7.47311e-190	E30	ID2
4.07463e-194	0.586578	0.749	0.088	7.90478e-190	E30	MDH1
6.24755e-194	0.304649	0.226	0.001	1.21202e-189	E30	IFIT1
7.23506e-194	0.471765	0.686	0.072	1.4036e-189	E30	SNRPF
7.47576e-194	0.464711	0.678	0.071	1.4503e-189	E30	GATD3
7.71217e-194	0.794185	0.795	0.103	1.49616e-189	E30	CCT5
8.17724e-194	0.385328	0.58	0.05	1.58638e-189	E30	EXOSC6
8.29162e-194	1.55475	0.919	0.165	1.60858e-189	E30	ENSBTAG00000040602
1.00579e-193	0.310492	0.541	0.042	1.95123e-189	E30	ENSBTAG00000052790
1.28275e-193	0.714064	0.781	0.097	2.48854e-189	E30	TRAPPC5
1.32939e-193	0.836255	0.809	0.107	2.57902e-189	E30	PRELID1
1.3857e-193	0.266853	0.445	0.026	2.68826e-189	E30	GTF2F1
1.84986e-193	0.338568	0.463	0.029	3.58873e-189	E30	RHNO1
1.92718e-193	0.386633	0.473	0.031	3.73873e-189	E30	DHFR
3.13804e-193	0.621591	0.746	0.088	6.0878e-189	E30	EIF6
4.19479e-193	0.498891	0.696	0.075	8.13789e-189	E30	SNX17
7.12698e-193	0.255083	0.463	0.029	1.38263e-188	E30	ENSBTAG00000003937
7.52328e-193	0.31458	0.424	0.023	1.45952e-188	E30	KLK1
7.84201e-193	0.26472	0.413	0.022	1.52135e-188	E30	NRM
3.71369e-192	3.49971	0.989	0.355	7.20456e-188	E30	S100A11
4.05166e-192	2.00419	0.947	0.214	7.86022e-188	E30	RPS4X
4.64988e-192	0.448667	0.686	0.072	9.02077e-188	E30	SLC35B1
4.83222e-192	0.624256	0.763	0.093	9.3745e-188	E30	KLF4
6.58564e-192	0.434092	0.654	0.066	1.27761e-187	E30	ROMO1
6.95738e-192	0.396694	0.406	0.021	1.34973e-187	E30	COL5A1
1.07185e-191	2.41461	0.94	0.261	2.0794e-187	E30	CFL1
1.4646e-191	0.453349	0.208	0	2.84132e-187	E30	HBE1.1
3.76633e-191	0.419076	0.417	0.023	7.30667e-187	E30	VAV2
6.46778e-191	0.94241	0.792	0.108	1.25475e-186	E30	PRDX4
6.4929e-191	0.444801	0.664	0.068	1.25962e-186	E30	KRT8
7.71872e-191	0.353176	0.509	0.038	1.49743e-186	E30	PNO1
7.92834e-191	0.324577	0.523	0.04	1.5381e-186	E30	SLC35C2
8.05007e-191	0.939664	0.739	0.09	1.56171e-186	E30	NOCT
8.26507e-191	1.02285	0.848	0.126	1.60342e-186	E30	UBL5
9.31805e-191	0.290537	0.541	0.043	1.8077e-186	E30	AURKAIP1
1.3849e-190	1.13215	0.869	0.134	2.68671e-186	E30	GSTP1.1
1.66714e-190	0.584934	0.71	0.08	3.23425e-186	E30	PITHD1
1.76238e-190	0.366001	0.615	0.058	3.41902e-186	E30	FIBP
2.55802e-190	0.733909	0.799	0.104	4.96256e-186	E30	DYNLRB1
4.11933e-190	0.429107	0.668	0.069	7.9915e-186	E30	SSBP1
8.39921e-190	0.281037	0.459	0.029	1.62945e-185	E30	ELOF1
8.52373e-190	0.497007	0.703	0.077	1.6536e-185	E30	MYDGF
1.03986e-189	0.583123	0.739	0.087	2.01733e-185	E30	TMEM258
1.24603e-189	0.321924	0.548	0.045	2.41731e-185	E30	MIX23
2.61617e-189	0.781734	0.784	0.103	5.07538e-185	E30	SRSF9
5.28307e-189	0.489468	0.714	0.081	1.02492e-184	E30	GUK1
5.47498e-189	0.572432	0.505	0.038	1.06215e-184	E30	HERC6
7.65362e-189	0.42056	0.717	0.08	1.4848e-184	E30	C24H18orf32
7.98461e-189	0.888186	0.809	0.111	1.54902e-184	E30	RAB5IF
1.26261e-188	0.315481	0.47	0.032	2.44946e-184	E30	EID1
1.40149e-188	0.313379	0.611	0.057	2.7189e-184	E30	EMC4
2.13139e-188	0.496602	0.728	0.084	4.1349e-184	E30	DCTN3
2.46309e-188	1.41968	0.88	0.157	4.77839e-184	E30	ENSBTAG00000039555
2.68163e-188	0.369548	0.625	0.061	5.20236e-184	E30	CHMP4A
3.7861e-188	0.707093	0.403	0.022	7.34503e-184	E30	CITED4
6.66132e-188	0.507426	0.721	0.083	1.2923e-183	E30	RPS27L
7.45792e-188	0.37877	0.332	0.012	1.44684e-183	E30	HSD17B1
1.11614e-187	0.452722	0.696	0.077	2.16532e-183	E30	CNIH1
1.22018e-187	0.369982	0.562	0.048	2.36716e-183	E30	PMF1
1.839e-187	0.455475	0.647	0.066	3.56765e-183	E30	POLR2L
2.51182e-187	0.265134	0.53	0.042	4.87293e-183	E30	AIMP2
2.69023e-187	0.264367	0.449	0.028	5.21904e-183	E30	BLOC1S4
2.7308e-187	1.08976	0.859	0.134	5.29774e-183	E30	COX7A2
3.77285e-187	1.3033	0.837	0.128	7.31932e-183	E30	EMP3
5.38133e-187	0.991451	0.859	0.13	1.04398e-182	E30	LAMTOR1
6.68441e-187	1.00958	0.802	0.109	1.29678e-182	E30	PPP1R15A
7.47706e-187	0.371318	0.657	0.068	1.45055e-182	E30	STUB1
7.9529e-187	0.363333	0.569	0.05	1.54286e-182	E30	NDUFS3
9.13327e-187	0.534867	0.717	0.083	1.77185e-182	E30	ENSBTAG00000023792
1.28716e-186	0.296333	0.442	0.027	2.4971e-182	E30	ORAI2
1.49368e-186	0.349358	0.572	0.051	2.89773e-182	E30	TPRKB
1.83967e-186	0.309596	0.484	0.034	3.56896e-182	E30	DPM2
4.00695e-186	0.730002	0.774	0.1	7.77348e-182	E30	RWDD1
4.27054e-186	0.461474	0.661	0.07	8.28485e-182	E30	STOML2
4.42301e-186	0.622227	0.784	0.1	8.58064e-182	E30	GALK1
5.52841e-186	0.78631	0.834	0.116	1.07251e-181	E30	TMEM14C
8.74494e-186	0.413948	0.583	0.054	1.69652e-181	E30	HRAS
1.03479e-185	0.658503	0.466	0.032	2.0075e-181	E30	ENSBTAG00000001143
1.11128e-185	1.05974	0.784	0.109	2.15587e-181	E30	PMP22
1.2993e-185	0.687	0.756	0.095	2.52064e-181	E30	SNRPG
2.38638e-185	1.70692	0.933	0.205	4.62958e-181	E30	RPL36AL
2.53154e-185	0.26712	0.495	0.036	4.91118e-181	E30	ENSBTAG00000039728
3.97399e-185	0.713944	0.788	0.104	7.70954e-181	E30	HYPK
4.20885e-185	0.253848	0.424	0.025	8.16517e-181	E30	RBM15B
8.32794e-185	0.532795	0.753	0.092	1.61562e-180	E30	UFC1
9.09468e-185	0.351935	0.65	0.067	1.76437e-180	E30	PPP1R7
1.77625e-184	1.98883	0.919	0.195	3.44592e-180	E30	TXN
2.05211e-184	0.575156	0.795	0.103	3.9811e-180	E30	UQCRC1
2.09357e-184	0.429225	0.686	0.076	4.06152e-180	E30	ACP1
5.19235e-184	0.320243	0.498	0.038	1.00732e-179	E30	HHEX
1.0349e-183	2.04498	0.975	0.26	2.00771e-179	E30	RPL7
1.28088e-183	0.33495	0.594	0.056	2.48491e-179	E30	RAMAC
2.09142e-183	0.281736	0.41	0.023	4.05735e-179	E30	TK1
2.45805e-183	1.93556	0.954	0.245	4.76862e-179	E30	NACA
2.60278e-183	1.41543	0.894	0.161	5.04939e-179	E30	EEF1B2
3.75375e-183	0.322765	0.551	0.048	7.28228e-179	E30	ANAPC11
5.28608e-183	2.19955	0.975	0.275	1.0255e-178	E30	RPS13
6.31596e-183	0.281218	0.509	0.04	1.2253e-178	E30	GID8
7.48559e-183	0.250492	0.445	0.029	1.4522e-178	E30	ARF5
7.92485e-183	1.10777	0.859	0.136	1.53742e-178	E30	MRFAP1L1
9.68465e-183	0.2939	0.491	0.037	1.87882e-178	E30	HCFC1R1
1.75333e-182	0.252104	0.413	0.024	3.40146e-178	E30	EXOSC5
1.92746e-182	0.303294	0.42	0.025	3.73928e-178	E30	LRRC59
2.0286e-182	0.410911	0.661	0.071	3.93548e-178	E30	BCL7C
2.57428e-182	0.518659	0.71	0.083	4.9941e-178	E30	PRELID3B
5.8773e-182	0.336195	0.53	0.044	1.1402e-177	E30	GLRX5
6.59297e-182	0.540911	0.735	0.089	1.27904e-177	E30	FADD
9.17872e-182	0.32763	0.597	0.057	1.78067e-177	E30	DDA1
9.61163e-182	0.340013	0.604	0.058	1.86466e-177	E30	EMC8
1.04326e-181	0.994585	0.827	0.126	2.02393e-177	E30	SNRPB
1.51883e-181	0.442964	0.689	0.078	2.94653e-177	E30	PSMD13
1.62018e-181	1.20342	0.869	0.144	3.14315e-177	E30	DYNLL1
1.86496e-181	0.303887	0.569	0.052	3.61802e-177	E30	LYPLA2
2.09216e-181	0.597553	0.784	0.102	4.0588e-177	E30	COPS6
2.96263e-181	0.897508	0.852	0.129	5.7475e-177	E30	NDUFS5
3.05768e-181	1.26268	0.862	0.146	5.93191e-177	E30	TMEM256
3.78532e-181	0.375938	0.608	0.06	7.34353e-177	E30	PSMG1
4.13835e-181	0.450424	0.208	0.001	8.02839e-177	E30	HAS2
5.20172e-181	0.605029	0.746	0.094	1.00913e-176	E30	NDUFS7
5.89262e-181	1.57075	0.852	0.137	1.14317e-176	E30	BAG3
6.44413e-181	0.638796	0.792	0.105	1.25016e-176	E30	NDUFS2
7.03601e-181	0.728085	0.806	0.112	1.36499e-176	E30	MRPL23
8.95995e-181	0.687237	0.784	0.106	1.73823e-176	E30	NDUFB7
9.34662e-181	0.291167	0.537	0.046	1.81324e-176	E30	SDHAF2
1.57013e-180	1.71643	0.894	0.177	3.04606e-176	E30	BBLN
2.98767e-180	0.524372	0.742	0.092	5.79607e-176	E30	TAX1BP3
3.19622e-180	0.391275	0.661	0.071	6.20067e-176	E30	MRPS23
3.27247e-180	0.523101	0.724	0.088	6.34859e-176	E30	MRPL58
4.97845e-180	0.275772	0.42	0.025	9.65819e-176	E30	CDK2AP1
8.50324e-180	0.328673	0.611	0.061	1.64963e-175	E30	LSM5
9.21051e-180	1.59779	0.883	0.155	1.78684e-175	E30	CITED2
1.89533e-179	0.297786	0.424	0.026	3.67694e-175	E30	GINS1
2.27718e-179	0.431604	0.675	0.076	4.41772e-175	E30	PSMC4
2.34562e-179	0.296603	0.558	0.05	4.5505e-175	E30	C9H6orf120
2.51216e-179	0.591828	0.749	0.095	4.87359e-175	E30	NDUFB1
2.62002e-179	1.56378	0.922	0.196	5.08283e-175	E30	NDUFA4
5.06833e-179	0.709981	0.788	0.108	9.83257e-175	E30	TWF2
8.67631e-179	0.730471	0.799	0.111	1.68321e-174	E30	MRPL52
1.17038e-178	0.270176	0.509	0.041	2.27053e-174	E30	MPDU1
1.8435e-178	1.51368	0.894	0.18	3.57639e-174	E30	SUMO2
2.20157e-178	0.722836	0.753	0.099	4.27106e-174	E30	GNPDA1
2.33941e-178	0.397278	0.657	0.072	4.53845e-174	E30	PRDX3
2.80097e-178	0.959886	0.83	0.126	5.43388e-174	E30	MRPL41
2.9693e-178	0.507267	0.714	0.086	5.76043e-174	E30	AKR1A1
3.91302e-178	0.805308	0.809	0.115	7.59125e-174	E30	CHMP2A
4.16126e-178	0.330895	0.576	0.054	8.07285e-174	E30	AARSD1
5.23776e-178	1.66156	0.89	0.19	1.01613e-173	E30	RAN
5.6539e-178	0.365257	0.576	0.055	1.09686e-173	E30	MRPL18
9.84898e-178	0.251452	0.473	0.035	1.9107e-173	E30	ZNF511
1.08582e-177	0.284248	0.498	0.039	2.10648e-173	E30	NSMCE4A
1.1916e-177	0.301631	0.59	0.057	2.3117e-173	E30	RNPEPL1
1.20303e-177	1.9767	0.993	0.261	2.33388e-173	E30	ND2
1.27817e-177	0.9095	0.777	0.11	2.47966e-173	E30	GUSB
1.60715e-177	1.18016	0.915	0.163	3.11788e-173	E30	SUB1
1.97776e-177	0.529712	0.721	0.088	3.83686e-173	E30	MED21
5.27403e-177	0.458396	0.498	0.04	1.02316e-172	E30	MCM2
6.80603e-177	1.02928	0.852	0.137	1.32037e-172	E30	NDUFS8
7.38399e-177	0.578033	0.668	0.077	1.43249e-172	E30	PSMB10
9.98507e-177	1.54779	0.929	0.201	1.9371e-172	E30	ATP5MG
1.14142e-176	0.49885	0.767	0.099	2.21435e-172	E30	STMP1
1.32444e-176	0.254456	0.449	0.031	2.56942e-172	E30	POLR2J
1.47e-176	0.413504	0.657	0.073	2.85179e-172	E30	AAMP
1.49885e-176	0.409374	0.272	0.007	2.90778e-172	E30	GBP4
1.76368e-176	0.425929	0.682	0.078	3.42154e-172	E30	CTDNEP1
1.76509e-176	0.271726	0.534	0.046	3.42428e-172	E30	MRPS17
1.84573e-176	0.568484	0.731	0.091	3.58071e-172	E30	CDC37
4.31531e-176	0.392879	0.678	0.078	8.3717e-172	E30	SNF8
4.63363e-176	0.329974	0.608	0.062	8.98925e-172	E30	MYL12B
5.27756e-176	0.26974	0.498	0.04	1.02385e-171	E30	NAXE
6.94647e-176	0.543675	0.657	0.075	1.34762e-171	E30	SEC11C
1.21858e-175	0.494243	0.64	0.07	2.36405e-171	E30	DPH3
1.26142e-175	3.04923	0.954	0.368	2.44716e-171	E30	ENSBTAG00000048782
1.46681e-175	1.19412	0.845	0.142	2.84561e-171	E30	TOMM6
1.7845e-175	0.30639	0.534	0.047	3.46192e-171	E30	MED29
2.4907e-175	0.702541	0.784	0.109	4.83195e-171	E30	CIB1
3.41482e-175	0.387454	0.618	0.064	6.62475e-171	E30	BAK1
3.5945e-175	0.704513	0.753	0.101	6.97332e-171	E30	UBE2M
3.77481e-175	0.274764	0.484	0.037	7.32314e-171	E30	ALDOC
5.97059e-175	0.340957	0.587	0.058	1.15829e-170	E30	IDH3B
6.36009e-175	0.743968	0.767	0.105	1.23386e-170	E30	PSMD8
7.22801e-175	1.8457	0.898	0.211	1.40223e-170	E30	GABARAP
8.87511e-175	0.335833	0.721	0.087	1.72177e-170	E30	FKBP8
9.42616e-175	2.32906	0.968	0.315	1.82868e-170	E30	RPL14
9.96481e-175	1.00027	0.841	0.135	1.93317e-170	E30	PSMB4
1.32843e-174	0.318391	0.516	0.044	2.57716e-170	E30	TMEM126A
1.62978e-174	0.415799	0.491	0.04	3.16177e-170	E30	TEX12
2.58961e-174	0.259255	0.417	0.026	5.02385e-170	E30	ENSBTAG00000012276
4.04252e-174	0.54076	0.403	0.024	7.84249e-170	E30	PTTG1
4.79397e-174	1.08728	0.873	0.147	9.30029e-170	E30	EIF3K
1.70273e-173	2.09658	0.958	0.28	3.3033e-169	E30	RPL3
2.0164e-173	0.496143	0.763	0.101	3.91182e-169	E30	NDUFB3
2.75694e-173	0.70947	0.781	0.109	5.34846e-169	E30	NEDD8
3.16481e-173	0.298679	0.611	0.063	6.13974e-169	E30	GET3
3.2724e-173	1.48183	0.94	0.194	6.34845e-169	E30	EEF1D
4.01132e-173	0.687327	0.802	0.114	7.78197e-169	E30	NDUFC2
4.97696e-173	0.367511	0.636	0.069	9.65529e-169	E30	RUVBL1
7.61521e-173	0.815028	0.731	0.097	1.47735e-168	E30	IER5L
1.05987e-172	0.29301	0.555	0.052	2.05614e-168	E30	NDUFA3
1.34283e-172	0.272605	0.466	0.035	2.60509e-168	E30	ABHD11
1.56685e-172	1.02708	0.625	0.071	3.03969e-168	E30	HBA
4.43436e-172	1.35945	0.883	0.17	8.60266e-168	E30	DBI
1.63532e-171	0.403842	0.65	0.073	3.17252e-167	E30	SLIRP
1.71828e-171	0.828388	0.827	0.127	3.33346e-167	E30	PSMC5
1.92841e-171	0.358223	0.544	0.05	3.74112e-167	E30	PSMG2
2.12914e-171	0.966705	0.862	0.143	4.13053e-167	E30	ATP5MF
2.13844e-171	0.255293	0.516	0.044	4.14857e-167	E30	ACADS
2.35252e-171	0.266498	0.544	0.05	4.56388e-167	E30	SF3B4
2.50086e-171	0.304605	0.647	0.072	4.85168e-167	E30	VKORC1
2.58289e-171	0.274402	0.53	0.047	5.0108e-167	E30	MCRS1
2.84745e-171	0.855006	0.813	0.123	5.52406e-167	E30	ARHGDIB
3.24154e-171	0.336731	0.601	0.062	6.28858e-167	E30	AIP
3.27622e-171	0.335085	0.572	0.056	6.35587e-167	E30	RNPEP
3.41848e-171	0.290753	0.53	0.048	6.63186e-167	E30	MRPL30
5.30179e-171	0.595899	0.466	0.037	1.02855e-166	E30	PLXDC1
5.37313e-171	0.312254	0.551	0.052	1.04239e-166	E30	ADRM1
5.82224e-171	0.557309	0.767	0.104	1.12951e-166	E30	SSRP1
6.46406e-171	0.285307	0.495	0.041	1.25403e-166	E30	PLEKHJ1
7.16816e-171	0.384205	0.664	0.077	1.39062e-166	E30	VPS25
1.37102e-170	0.256962	0.548	0.051	2.65979e-166	E30	PSME3
1.74731e-170	1.57722	0.908	0.199	3.38978e-166	E30	BRI3
1.74985e-170	0.641056	0.749	0.101	3.39471e-166	E30	FHL3
1.85908e-170	0.394918	0.693	0.083	3.60662e-166	E30	PRKCSH
2.18256e-170	0.427087	0.675	0.08	4.23417e-166	E30	TIMM8B
2.42095e-170	0.25482	0.502	0.042	4.69665e-166	E30	RBIS
5.03162e-170	0.2639	0.509	0.044	9.76134e-166	E30	NDUFB6
6.76985e-170	0.522919	0.71	0.09	1.31335e-165	E30	SLBP
8.30225e-170	0.745283	0.82	0.122	1.61064e-165	E30	CYC1
8.98621e-170	0.309059	0.491	0.041	1.74332e-165	E30	CXXC5
2.52107e-169	2.15351	0.968	0.314	4.89088e-165	E30	RPL24
4.7362e-169	2.35028	0.986	0.316	9.18823e-165	E30	HSPB1
7.24718e-169	0.342313	0.64	0.072	1.40595e-164	E30	MRPL21
2.30777e-168	0.532477	0.707	0.089	4.47707e-164	E30	CSRP1
3.11477e-168	2.16972	0.961	0.298	6.04265e-164	E30	RPL29
3.24991e-168	0.285479	0.452	0.034	6.30483e-164	E30	ISG20L2
3.8562e-168	0.259289	0.481	0.039	7.48103e-164	E30	SNRNP25
4.11805e-168	0.90409	0.83	0.131	7.98901e-164	E30	HNRNPAB
4.72319e-168	0.360013	0.53	0.049	9.163e-164	E30	JUP
5.45292e-168	0.979591	0.845	0.136	1.05787e-163	E30	PFDN5
5.66049e-168	0.395618	0.675	0.08	1.09814e-163	E30	TAF9
5.77631e-168	0.761517	0.749	0.105	1.12061e-163	E30	CCR1
8.32695e-168	1.2675	0.883	0.169	1.61543e-163	E30	CAPNS1
9.29161e-168	2.04058	1	0.302	1.80257e-163	E30	ND4
1.3801e-167	0.638392	0.792	0.114	2.67739e-163	E30	CHMP5
1.56012e-167	0.990379	0.862	0.146	3.02664e-163	E30	VSIG10L
1.87204e-167	2.00821	0.972	0.296	3.63176e-163	E30	RPL5
2.98998e-167	0.485358	0.495	0.043	5.80056e-163	E30	GMNN
5.84765e-167	0.397991	0.678	0.082	1.13444e-162	E30	UQCC4
8.43156e-167	2.09113	0.972	0.289	1.63572e-162	E30	RPS6
1.12682e-166	0.995065	0.88	0.151	2.18603e-162	E30	RBM3
1.28438e-166	0.333762	0.597	0.063	2.49171e-162	E30	DRG1
1.61692e-166	2.41799	0.993	0.393	3.13682e-162	E30	RPSA
1.73837e-166	0.254309	0.456	0.035	3.37245e-162	E30	DTX3L
1.80156e-166	0.572549	0.77	0.108	3.49503e-162	E30	ILF2
1.99437e-166	0.331124	0.558	0.055	3.86909e-162	E30	TRABD
2.0995e-166	0.461662	0.664	0.08	4.07304e-162	E30	NANS
2.25023e-166	2.08626	0.947	0.275	4.36545e-162	E30	FAU
2.36429e-166	0.288528	0.618	0.068	4.58672e-162	E30	TXNL4A
2.82505e-166	0.416897	0.721	0.093	5.48059e-162	E30	SDF2
3.23442e-166	0.878819	0.88	0.148	6.27477e-162	E30	COPE
4.94323e-166	0.957769	0.859	0.144	9.58987e-162	E30	TMA7
5.23845e-166	0.314572	0.562	0.056	1.01626e-161	E30	POLR2K
5.38549e-166	2.13519	0.961	0.296	1.04479e-161	E30	RPL30
7.12293e-166	0.267452	0.633	0.071	1.38185e-161	E30	NDUFA9
7.72596e-166	0.471594	0.703	0.089	1.49884e-161	E30	TXNDC5
7.9629e-166	1.18574	0.866	0.158	1.5448e-161	E30	IFI30
1.12461e-165	0.833189	0.837	0.132	2.18175e-161	E30	PLEKHO1
1.45085e-165	2.10543	0.961	0.294	2.81465e-161	E30	RPL9
1.50856e-165	0.334277	0.565	0.057	2.9266e-161	E30	ADH5
1.63868e-165	0.345356	0.59	0.063	3.17905e-161	E30	ATRAID
1.88317e-165	0.355329	0.587	0.062	3.65335e-161	E30	ASL
2.03305e-165	0.843853	0.837	0.134	3.94412e-161	E30	ATP5PO
3.3374e-165	0.256681	0.481	0.04	6.47455e-161	E30	POLR3K
7.90676e-165	0.284675	0.233	0.004	1.53391e-160	E30	UPK3A
2.32199e-164	1.12065	0.753	0.114	4.50466e-160	E30	HMGB2
2.72926e-164	0.360041	0.382	0.023	5.29477e-160	E30	ASF1B
4.62028e-164	0.861165	0.47	0.04	8.96335e-160	E30	HSPA6
5.43502e-164	0.628823	0.795	0.117	1.05439e-159	E30	SNRPB2
5.86684e-164	1.01029	0.82	0.135	1.13817e-159	E30	PARP1
6.69454e-164	0.288479	0.537	0.051	1.29874e-159	E30	LYAR
8.05982e-164	2.60425	0.961	0.379	1.5636e-159	E30	PFN1
8.07806e-164	0.324674	0.647	0.076	1.56714e-159	E30	IDH3G
8.26514e-164	0.440577	0.505	0.046	1.60344e-159	E30	IGF2
8.57163e-164	0.913635	0.424	0.032	1.6629e-159	E30	TINAGL1
1.08132e-163	0.469825	0.463	0.038	2.09777e-159	E30	CCNB2
1.80213e-163	1.27088	0.883	0.175	3.49613e-159	E30	ATP5F1E
1.9567e-163	0.66606	0.753	0.107	3.79599e-159	E30	YWHAH
2.18761e-163	2.27432	0.979	0.357	4.24396e-159	E30	PTMA
4.38722e-163	0.323425	0.615	0.069	8.51121e-159	E30	NELFE
4.44257e-163	0.694694	0.806	0.121	8.61858e-159	E30	TRIR
8.24404e-163	0.285832	0.537	0.052	1.59934e-158	E30	MPG
1.37669e-162	0.269286	0.512	0.047	2.67077e-158	E30	ZNF622
1.68252e-162	0.392441	0.569	0.06	3.26409e-158	E30	DDX39A
2.16345e-162	0.325674	0.618	0.07	4.19709e-158	E30	TIMM44
2.34286e-162	0.43667	0.611	0.069	4.54515e-158	E30	ANP32E
2.50869e-162	1.21709	0.912	0.179	4.86686e-158	E30	UQCRH
2.57209e-162	0.482018	0.756	0.104	4.98986e-158	E30	CHID1
3.44022e-162	0.318545	0.671	0.082	6.67403e-158	E30	RSL24D1
3.60213e-162	2.17199	0.951	0.318	6.98813e-158	E30	RPL19
4.11412e-162	1.62499	0.926	0.228	7.9814e-158	E30	MYL12A
4.40396e-162	0.273945	0.64	0.074	8.54369e-158	E30	POLR2H
4.84852e-162	0.369575	0.558	0.057	9.40612e-158	E30	FAM174C
7.49903e-162	1.68813	0.428	0.033	1.45481e-157	E30	MT1E.1
8.78949e-162	0.657207	0.792	0.118	1.70516e-157	E30	CCT7
9.75369e-162	0.372187	0.671	0.083	1.89222e-157	E30	C3H1orf43
1.35419e-161	0.51616	0.855	0.131	2.62712e-157	E30	C15H11orf34
1.41386e-161	0.65395	0.784	0.115	2.74288e-157	E30	DSTN
1.47778e-161	0.25188	0.484	0.041	2.86689e-157	E30	NUBP1
2.86778e-161	0.648462	0.622	0.073	5.5635e-157	E30	ANGPTL4
5.34885e-161	0.452398	0.724	0.097	1.03768e-156	E30	LSM6
6.03186e-161	0.355611	0.615	0.07	1.17018e-156	E30	CIAO2B
8.5511e-161	0.288616	0.491	0.043	1.65891e-156	E30	C14H8orf82
1.58257e-160	0.920423	0.661	0.087	3.07018e-156	E30	PXDN
2.99809e-160	0.437484	0.686	0.088	5.8163e-156	E30	NDUFA5
2.99943e-160	1.87209	0.951	0.232	5.8189e-156	E30	HSPD1
3.52055e-160	0.364848	0.618	0.071	6.82988e-156	E30	ENSBTAG00000053459
8.00723e-160	0.457764	0.721	0.097	1.5534e-155	E30	NOL7
8.34062e-160	0.870038	0.82	0.134	1.61808e-155	E30	PTMS
1.10024e-159	0.38861	0.643	0.077	2.13447e-155	E30	GLRX2
1.36433e-159	1.95156	0.961	0.301	2.6468e-155	E30	SLC25A6
1.4133e-159	0.359486	0.537	0.054	2.7418e-155	E30	SAP30
1.69901e-159	0.304096	0.417	0.03	3.29609e-155	E30	CENPM
1.97988e-159	0.317997	0.59	0.064	3.84098e-155	E30	FLII
2.92653e-159	1.86403	1	0.3	5.67748e-155	E30	CYTB
3.23277e-159	0.514328	0.742	0.103	6.27158e-155	E30	BID
3.59292e-159	1.43708	0.883	0.188	6.97027e-155	E30	OAZ1
3.84803e-159	2.12279	0.936	0.304	7.46518e-155	E30	RPL27
4.29399e-159	0.345395	0.643	0.077	8.33034e-155	E30	GLMP
5.00948e-159	0.263099	0.466	0.039	9.7184e-155	E30	DHRS1
5.25319e-159	0.413413	0.693	0.089	1.01912e-154	E30	RPS19BP1
6.07906e-159	0.674214	0.806	0.124	1.17934e-154	E30	TPRG1L
6.95819e-159	0.359772	0.558	0.058	1.34989e-154	E30	PGP
1.12324e-158	1.7035	0.943	0.278	2.17908e-154	E30	CLTA
1.27298e-158	2.16833	0.968	0.333	2.46957e-154	E30	RPL32
1.4741e-158	0.737331	0.827	0.131	2.85976e-154	E30	SSB
2.31052e-158	0.258485	0.385	0.025	4.48241e-154	E30	COPRS
2.37573e-158	0.278615	0.675	0.085	4.60891e-154	E30	ORMDL2
2.43378e-158	0.651472	0.823	0.129	4.72154e-154	E30	ELOB
2.51196e-158	0.446023	0.502	0.047	4.87321e-154	E30	IFI44L
3.31817e-158	0.299971	0.565	0.06	6.43725e-154	E30	PDCL3
4.74809e-158	2.3211	0.986	0.378	9.21129e-154	E30	RPS27A
5.16889e-158	1.73066	0.993	0.285	1.00276e-153	E30	ND1
5.26157e-158	0.476672	0.714	0.096	1.02074e-153	E30	UBE2I.1
5.37946e-158	0.902993	0.83	0.139	1.04361e-153	E30	EIF3M
6.32628e-158	0.384378	0.3	0.013	1.2273e-153	E30	SYCP3
6.63994e-158	2.2385	0.968	0.354	1.28815e-153	E30	RPL28
2.06756e-157	0.571021	0.58	0.065	4.01107e-153	E30	KPNA2
2.45729e-157	0.359885	0.565	0.06	4.76713e-153	E30	SP110
3.95263e-157	0.598565	0.806	0.123	7.6681e-153	E30	PEA15
4.90075e-157	0.44976	0.724	0.099	9.50745e-153	E30	FAM32A
5.34315e-157	0.284726	0.647	0.079	1.03657e-152	E30	SRP68
7.92405e-157	0.263243	0.601	0.068	1.53727e-152	E30	TMEM208
1.00414e-156	0.621057	0.731	0.104	1.94802e-152	E30	SELENOK
1.38749e-156	1.34833	0.929	0.191	2.69173e-152	E30	RPS26
2.3328e-156	0.431943	0.633	0.077	4.52564e-152	E30	SSLP1
2.53166e-156	2.13214	0.972	0.37	4.91143e-152	E30	RPS10
3.41185e-156	0.325308	0.519	0.051	6.61899e-152	E30	NMRAL1
3.87475e-156	1.90124	0.954	0.291	7.51702e-152	E30	RPL37
4.30174e-156	1.52616	0.915	0.198	8.34537e-152	E30	CACYBP
5.2642e-156	0.332897	0.527	0.053	1.02126e-151	E30	NOLC1
5.96232e-156	0.33299	0.442	0.036	1.15669e-151	E30	MXD4
6.15687e-156	1.24698	0.873	0.176	1.19443e-151	E30	GLRX
6.16732e-156	0.57187	0.633	0.078	1.19646e-151	E30	XAF1
8.34192e-156	2.24214	0.986	0.397	1.61833e-151	E30	RPL8
9.76839e-156	0.439857	0.693	0.092	1.89507e-151	E30	SNRPA1
1.02891e-155	0.295277	0.498	0.047	1.99608e-151	E30	FBLIM1
1.23847e-155	0.290133	0.495	0.046	2.40262e-151	E30	TIMM21
1.58659e-155	0.387047	0.58	0.064	3.07799e-151	E30	PARP9
1.63208e-155	0.322261	0.594	0.067	3.16623e-151	E30	ARL1
1.86698e-155	2.1006	0.975	0.358	3.62195e-151	E30	RPL6
2.69753e-155	0.337258	0.668	0.085	5.2332e-151	E30	PHAX
2.8683e-155	0.766374	0.671	0.092	5.56451e-151	E30	GNG11
3.32465e-155	0.828931	0.608	0.074	6.44982e-151	E30	ABTB2
3.58325e-155	0.7764	0.809	0.131	6.95151e-151	E30	OSTC
3.78925e-155	1.11463	0.883	0.174	7.35114e-151	E30	SEM1
6.65041e-155	0.275598	0.65	0.08	1.29018e-150	E30	NDUFAF3
7.57254e-155	0.433192	0.601	0.071	1.46907e-150	E30	VEGFB
1.0491e-154	0.381948	0.678	0.089	2.03525e-150	E30	PPIH
1.05493e-154	0.46824	0.675	0.089	2.04656e-150	E30	UAP1L1
1.17097e-154	0.448812	0.569	0.063	2.27167e-150	E30	SDF2L1
2.15384e-154	2.32542	0.823	0.193	4.17845e-150	E30	CCL14
2.57606e-154	0.329857	0.541	0.056	4.99756e-150	E30	BCCIP
2.63392e-154	0.562544	0.749	0.109	5.1098e-150	E30	MPC2
3.28311e-154	1.67056	0.958	0.263	6.36923e-150	E30	EEF1G
4.47679e-154	2.09242	0.943	0.31	8.68496e-150	E30	RPS3
5.47522e-154	2.20526	0.982	0.356	1.06219e-149	E30	RPL10
5.56587e-154	0.263478	0.293	0.012	1.07978e-149	E30	SELENOM
6.25991e-154	2.06894	0.975	0.345	1.21442e-149	E30	RPL18A
7.51841e-154	1.47666	0.915	0.218	1.45857e-149	E30	RPL17
7.52366e-154	0.31858	0.661	0.084	1.45959e-149	E30	NSFL1C
9.97619e-154	1.82848	0.929	0.263	1.93538e-149	E30	RPL26
1.03725e-153	1.70192	0.912	0.23	2.01226e-149	E30	HMGB1
1.04345e-153	0.351172	0.622	0.075	2.0243e-149	E30	MED10
1.17489e-153	0.407538	0.7	0.094	2.27928e-149	E30	SMARCB1
1.30334e-153	0.842557	0.799	0.128	2.52849e-149	E30	SIK1
1.65207e-153	2.33127	0.996	0.429	3.20502e-149	E30	RPS8
1.89087e-153	0.574286	0.777	0.118	3.66829e-149	E30	ARF3
2.00532e-153	1.21676	0.898	0.188	3.89032e-149	E30	SSR2
2.12462e-153	1.50612	0.905	0.227	4.12175e-149	E30	ARPC3
2.57932e-153	1.80141	0.968	0.324	5.00388e-149	E30	YBX1
4.07641e-153	1.19366	0.82	0.147	7.90824e-149	E30	MANF
6.17395e-153	0.289303	0.64	0.079	1.19775e-148	E30	MRPL28
6.87179e-153	0.410813	0.491	0.047	1.33313e-148	E30	MCM4
8.6297e-153	0.654663	0.816	0.131	1.67416e-148	E30	CBX3
8.69483e-153	2.20345	0.936	0.334	1.6868e-148	E30	LGALS1
9.70284e-153	1.79802	0.972	0.31	1.88235e-148	E30	RPS25
1.00062e-152	0.935426	0.848	0.152	1.9412e-148	E30	RPL36A
1.04454e-152	0.262906	0.516	0.051	2.0264e-148	E30	ELOVL1
1.05074e-152	0.330128	0.583	0.066	2.03844e-148	E30	LSM8
1.06069e-152	0.337382	0.629	0.077	2.05774e-148	E30	GTF2A2
1.09105e-152	1.81454	0.922	0.295	2.11663e-148	E30	PPIB
1.21722e-152	2.18591	0.975	0.409	2.3614e-148	E30	RPL7A
1.25881e-152	0.273414	0.498	0.048	2.44209e-148	E30	ATG101
1.79787e-152	0.261103	0.502	0.048	3.48788e-148	E30	NGDN
2.85637e-152	0.577836	0.753	0.113	5.54135e-148	E30	EIF3I
3.16382e-152	0.393262	0.678	0.089	6.13782e-148	E30	EMD
3.20709e-152	1.68586	0.936	0.272	6.22176e-148	E30	RPL15
5.70275e-152	2.48809	0.989	0.428	1.10633e-147	E30	RPS12
7.10991e-152	0.302968	0.548	0.058	1.37932e-147	E30	DHRS4
1.32838e-151	0.572307	0.76	0.114	2.57705e-147	E30	COX17
1.3803e-151	1.78685	0.947	0.308	2.67778e-147	E30	RPL35
1.39204e-151	0.335767	0.696	0.094	2.70055e-147	E30	CLTB
1.43935e-151	2.47647	0.958	0.419	2.79233e-147	E30	CSTB.1
1.7216e-151	2.02938	0.968	0.341	3.33991e-147	E30	RPS23
2.18401e-151	2.34023	0.993	0.434	4.23698e-147	E30	RPS2
2.93959e-151	0.738154	0.604	0.075	5.7028e-147	E30	PLK2
3.92867e-151	0.259642	0.456	0.04	7.62163e-147	E30	GCSH
4.00379e-151	0.807455	0.813	0.137	7.76736e-147	E30	SPCS3
4.92624e-151	1.35871	0.898	0.204	9.55691e-147	E30	PSMA7
6.19557e-151	0.267274	0.382	0.026	1.20194e-146	E30	HINT2
6.29292e-151	2.33207	1	0.43	1.22083e-146	E30	EEF1A1
6.29511e-151	0.275891	0.428	0.034	1.22125e-146	E30	MGAT2
1.28701e-150	1.54742	0.883	0.214	2.49681e-146	E30	AP2S1
1.36972e-150	2.40309	0.979	0.377	2.65726e-146	E30	ANXA1
2.42019e-150	0.466484	0.597	0.072	4.69517e-146	E30	MFNG
2.7737e-150	0.30912	0.562	0.062	5.38098e-146	E30	COA8
2.84845e-150	0.6499	0.77	0.12	5.52599e-146	E30	PSMA4
3.01795e-150	0.318494	0.576	0.066	5.85483e-146	E30	MRPS25
3.11611e-150	0.959552	0.862	0.161	6.04525e-146	E30	TAF10
3.12925e-150	0.366137	0.654	0.084	6.07074e-146	E30	ARL6IP4
3.46879e-150	0.270225	0.516	0.052	6.72946e-146	E30	DDRGK1
5.73672e-150	0.297767	0.65	0.083	1.11292e-145	E30	ABHD17A
5.87504e-150	2.18849	0.996	0.437	1.13976e-145	E30	RPS20
7.03805e-150	2.16766	0.993	0.44	1.36538e-145	E30	ZC3H10
8.35315e-150	0.871122	0.774	0.128	1.62051e-145	E30	LTC4S
9.95496e-150	0.493889	0.643	0.083	1.93126e-145	E30	RIGI
1.62877e-149	2.16027	0.996	0.43	3.15981e-145	E30	UBA52
2.12115e-149	2.33473	0.961	0.266	4.11502e-145	E30	HSPA1A
3.40847e-149	2.37912	0.993	0.421	6.61243e-145	E30	RPS11
4.62715e-149	0.549186	0.682	0.095	8.97666e-145	E30	PA2G4
5.49956e-149	0.521803	0.76	0.115	1.06691e-144	E30	PUF60
1.11527e-148	0.753687	0.742	0.116	2.16363e-144	E30	CCL16
1.29158e-148	0.51835	0.717	0.103	2.50566e-144	E30	NSA2
2.05939e-148	2.17177	0.986	0.428	3.99521e-144	E30	RPS18
2.51432e-148	2.04372	0.993	0.39	4.87779e-144	E30	RPS5
4.59247e-148	0.336819	0.597	0.072	8.90939e-144	E30	JTB
4.87283e-148	0.49312	0.693	0.097	9.45329e-144	E30	AHSA1
5.38665e-148	1.85915	0.972	0.337	1.04501e-143	E30	RPS29
6.58356e-148	0.462834	0.728	0.107	1.27721e-143	E30	ADSL
7.05975e-148	0.455306	0.742	0.11	1.36959e-143	E30	NDUFA10
7.67177e-148	1.24744	0.887	0.189	1.48832e-143	E30	GMFG
8.683e-148	0.763567	0.862	0.153	1.6845e-143	E30	HSBP1.1
9.06905e-148	0.318091	0.505	0.051	1.7594e-143	E30	ALDH4A1
9.48158e-148	0.766285	0.806	0.136	1.83943e-143	E30	GNG10
1.09152e-147	0.266807	0.382	0.027	2.11755e-143	E30	INKA1
1.75837e-147	0.517026	0.629	0.081	3.41124e-143	E30	TOB1
1.94752e-147	1.83768	0.908	0.232	3.77819e-143	E30	TPI1
2.84952e-147	1.98046	0.972	0.346	5.52808e-143	E30	RPS3A
3.32142e-147	1.5233	0.915	0.246	6.44356e-143	E30	POMP
3.81129e-147	0.984148	0.866	0.162	7.3939e-143	E30	GPX4
3.93022e-147	0.351659	0.657	0.087	7.62462e-143	E30	ENSBTAG00000050249
4.01678e-147	0.747383	0.799	0.133	7.79256e-143	E30	RAB3IL1
5.62347e-147	0.296756	0.477	0.046	1.09095e-142	E30	RFC2
7.72472e-147	0.770596	0.862	0.153	1.4986e-142	E30	PDCD6
8.85056e-147	0.929783	0.837	0.153	1.71701e-142	E30	ABRACL
1.09686e-146	0.31604	0.689	0.094	2.1279e-142	E30	PPM1G
1.32966e-146	0.560616	0.717	0.105	2.57955e-142	E30	RIDA
1.99105e-146	0.882361	0.724	0.11	3.86263e-142	E30	GRB10
2.05933e-146	0.283442	0.629	0.079	3.9951e-142	E30	AP1M1
2.16734e-146	0.386155	0.735	0.108	4.20464e-142	E30	WBP2
2.50943e-146	0.525583	0.749	0.114	4.8683e-142	E30	PGD
3.32747e-146	0.824231	0.866	0.158	6.4553e-142	E30	ATP5ME
6.83112e-146	0.714893	0.788	0.131	1.32524e-141	E30	NUDC
7.16184e-146	1.0615	0.88	0.18	1.3894e-141	E30	UBE2L3
7.61828e-146	0.250282	0.435	0.037	1.47795e-141	E30	RCN3
8.3743e-146	0.396764	0.65	0.087	1.62461e-141	E30	SUMO3
9.57473e-146	0.631634	0.774	0.125	1.8575e-141	E30	CIAO2A
1.34445e-145	0.3181	0.576	0.068	2.60823e-141	E30	TIMM23
1.36008e-145	0.254959	0.47	0.044	2.63855e-141	E30	ORAI1
1.50267e-145	0.705453	0.329	0.019	2.91519e-141	E30	MT1E
2.08016e-145	0.457892	0.339	0.021	4.03551e-141	E30	PCLAF
3.71788e-145	0.34049	0.647	0.085	7.21268e-141	E30	PRR5
4.78681e-145	1.13572	0.869	0.181	9.28642e-141	E30	ARHGDIA
5.36892e-145	0.338712	0.678	0.094	1.04157e-140	E30	DDX19A
5.97198e-145	1.21959	0.823	0.158	1.15856e-140	E30	LMNA
6.05653e-145	1.78053	0.958	0.308	1.17497e-140	E30	RPS27
6.94701e-145	0.619139	0.816	0.135	1.34772e-140	E30	IK
7.49594e-145	2.11085	0.993	0.414	1.45421e-140	E30	RPS24
7.58927e-145	0.298946	0.629	0.081	1.47232e-140	E30	FKBP11
1.83045e-144	1.9781	0.982	0.381	3.55108e-140	E30	RPL18
1.86172e-144	0.29486	0.505	0.053	3.61173e-140	E30	SORD
2.08098e-144	1.08634	0.883	0.179	4.03711e-140	E30	SET
2.28624e-144	0.619755	0.629	0.085	4.4353e-140	E30	NKG7
2.40266e-144	0.264898	0.417	0.034	4.66116e-140	E30	MPHOSPH10
2.41417e-144	1.90659	0.943	0.317	4.68349e-140	E30	RPL10A
3.29118e-144	0.508053	0.558	0.066	6.3849e-140	E30	WEE1
5.44752e-144	0.595613	0.707	0.105	1.05682e-139	E30	PFKL
5.96879e-144	1.95112	0.965	0.336	1.15794e-139	E30	RACK1
6.58862e-144	0.581257	0.7	0.103	1.27819e-139	E30	CCNG1
7.81106e-144	1.01693	0.908	0.179	1.51535e-139	E30	IGF2BP3
8.65716e-144	0.642183	0.788	0.13	1.67949e-139	E30	CCT6A
9.29084e-144	0.974328	0.876	0.175	1.80242e-139	E30	PSMB1
1.63693e-143	0.303673	0.625	0.081	3.17564e-139	E30	LSM1
2.30557e-143	0.325011	0.668	0.092	4.47281e-139	E30	CHCHD5
2.3825e-143	0.325934	0.668	0.092	4.62205e-139	E30	RETREG2
2.68364e-143	2.40188	0.996	0.755	5.20626e-139	E30	TMSB10
3.30922e-143	0.577462	0.731	0.113	6.4199e-139	E30	NIFK
3.9911e-143	2.04542	0.975	0.38	7.74274e-139	E30	NPAS2
5.14564e-143	0.471114	0.763	0.119	9.98254e-139	E30	TOMM7
5.35293e-143	0.386099	0.481	0.048	1.03847e-138	E30	POLR1F
6.43605e-143	0.339962	0.523	0.057	1.24859e-138	E30	RPA2
9.05457e-143	1.77837	0.951	0.318	1.75659e-138	E30	RPL34
9.90537e-143	2.17125	0.993	0.435	1.92164e-138	E30	RPL27A
1.09248e-142	1.9554	0.972	0.35	2.11942e-138	E30	H3-3B
1.50382e-142	0.252495	0.53	0.058	2.91741e-138	E30	VDAC3
3.20001e-142	0.972482	0.873	0.17	6.20803e-138	E30	HMGN1
3.22784e-142	0.372798	0.7	0.101	6.262e-138	E30	PPP1R18
3.83286e-142	0.330928	0.594	0.074	7.43575e-138	E30	EMC7
4.57608e-142	0.503515	0.583	0.074	8.8776e-138	E30	LMO2
6.05488e-142	1.15974	0.898	0.196	1.17465e-137	E30	SEC61G
1.00421e-141	0.406383	0.403	0.033	1.94817e-137	E30	ENSBTAG00000047621
1.38802e-141	0.46681	0.403	0.033	2.69276e-137	E30	RRM2
1.49657e-141	2.24302	1	0.591	2.90335e-137	E30	ACTG1
1.8555e-141	0.309574	0.625	0.082	3.59968e-137	E30	PSMD6
1.9218e-141	0.576709	0.802	0.134	3.72829e-137	E30	SF3B2
2.12561e-141	0.300146	0.555	0.065	4.12368e-137	E30	VAMP5
2.2104e-141	1.40854	0.898	0.211	4.28818e-137	E30	VDAC2
2.51771e-141	0.29959	0.671	0.094	4.88436e-137	E30	NOP53
2.67926e-141	0.410332	0.668	0.094	5.19776e-137	E30	OTUB1
3.66307e-141	0.542755	0.792	0.131	7.10635e-137	E30	TCP1
3.96952e-141	0.346872	0.208	0.004	7.70087e-137	E30	FABP7
4.94369e-141	0.620394	0.813	0.139	9.59076e-137	E30	AIMP1
5.27766e-141	0.764001	0.852	0.155	1.02387e-136	E30	RBX1
6.80202e-141	2.08546	0.986	0.433	1.31959e-136	E30	RPS14
1.25638e-140	0.460732	0.689	0.101	2.43738e-136	E30	LAP3
1.41319e-140	1.78489	0.979	0.349	2.74159e-136	E30	RPL35A
1.7363e-140	0.406948	0.65	0.09	3.36842e-136	E30	VBP1
1.92166e-140	2.55683	0.873	0.226	3.72802e-136	E30	RNASE4
2.55855e-140	2.01682	0.989	0.469	4.96359e-136	E30	RPS9
3.4133e-140	0.336551	0.537	0.062	6.62179e-136	E30	MCRIP2
3.62027e-140	0.255241	0.304	0.016	7.02332e-136	E30	CDCA3
3.70965e-140	0.593209	0.763	0.124	7.19672e-136	E30	DHRS3
6.77654e-140	0.339205	0.742	0.113	1.31465e-135	E30	CDC34
6.87912e-140	1.51813	0.933	0.277	1.33455e-135	E30	COX4I1
6.89744e-140	0.479718	0.678	0.098	1.3381e-135	E30	ANXA6
1.30746e-139	0.693116	0.749	0.123	2.53648e-135	E30	UBALD2
1.34084e-139	2.37299	0.996	0.462	2.60124e-135	E30	COX1
1.93276e-139	0.713298	0.498	0.055	3.74955e-135	E30	DNAJA4
2.04668e-139	0.395663	0.576	0.072	3.97057e-135	E30	SERTAD2
2.07107e-139	0.334848	0.601	0.078	4.01787e-135	E30	OSER1
2.83051e-139	1.11223	0.905	0.203	5.49119e-135	E30	SLC25A3
2.89553e-139	2.14036	0.975	0.453	5.61734e-135	E30	RPLP1
2.94507e-139	0.334249	0.686	0.098	5.71344e-135	E30	TCOF1
3.59688e-139	1.05401	0.873	0.179	6.97795e-135	E30	APRT
6.8527e-139	2.0218	0.926	0.256	1.32942e-134	E30	TUBA1B
6.945e-139	1.55226	0.947	0.291	1.34733e-134	E30	RPS21
1.0966e-138	1.42793	0.933	0.264	2.12741e-134	E30	SERF2
1.10389e-138	2.08641	0.989	0.411	2.14155e-134	E30	UBB
1.26135e-138	0.409941	0.431	0.04	2.44703e-134	E30	LSP1
1.40461e-138	1.04271	0.905	0.194	2.72495e-134	E30	ATP5F1A
1.41973e-138	0.278588	0.562	0.068	2.75427e-134	E30	CRELD2
1.52377e-138	0.719311	0.385	0.031	2.95611e-134	E30	UBE2C
2.00407e-138	0.39506	0.551	0.066	3.88791e-134	E30	PAG8
2.55809e-138	2.10514	1	0.51	4.96269e-134	E30	TPT1
2.92822e-138	0.453134	0.746	0.117	5.68075e-134	E30	AK2
4.80673e-138	0.542585	0.777	0.129	9.32507e-134	E30	SIRT2
5.24998e-138	0.252208	0.477	0.049	1.0185e-133	E30	MRTO4
5.83956e-138	0.308031	0.661	0.093	1.13287e-133	E30	KXD1
1.29159e-137	1.58002	0.954	0.313	2.50568e-133	E30	RPL36
1.98562e-137	0.437027	0.753	0.119	3.8521e-133	E30	ISCU
2.1534e-137	0.820312	0.834	0.159	4.1776e-133	E30	ELOC
2.36621e-137	0.537095	0.816	0.141	4.59045e-133	E30	RALBP1
3.13884e-137	0.95415	0.845	0.167	6.08934e-133	E30	KDELR1
3.14363e-137	0.261048	0.597	0.077	6.09865e-133	E30	GPAA1
3.16157e-137	1.03684	0.883	0.189	6.13344e-133	E30	ATP5F1C
3.55213e-137	1.0745	0.841	0.16	6.89113e-133	E30	PRDX5
5.5856e-137	0.28969	0.537	0.063	1.08361e-132	E30	SLC31A2
6.87687e-137	0.953784	0.735	0.125	1.33411e-132	E30	TUBB4B
7.30022e-137	0.366046	0.686	0.101	1.41624e-132	E30	MRPS2
7.42408e-137	0.690692	0.869	0.161	1.44027e-132	E30	ATP6AP1
8.68018e-137	1.55059	0.936	0.285	1.68396e-132	E30	RPL22
8.72661e-137	1.25576	0.915	0.21	1.69296e-132	E30	NPC2
9.19522e-137	0.338724	0.728	0.112	1.78387e-132	E30	ACO2
1.14298e-136	0.8198	0.852	0.163	2.21737e-132	E30	PPP1CA
2.34444e-136	1.98141	0.965	0.389	4.54822e-132	E30	RPS7
4.16889e-136	0.272714	0.541	0.064	8.08764e-132	E30	CHCHD7
1.00228e-135	0.525727	0.756	0.124	1.94442e-131	E30	STIP1
1.20402e-135	0.347613	0.498	0.055	2.3358e-131	E30	RHOC
1.34068e-135	0.268617	0.611	0.083	2.60092e-131	E30	EGR1
1.63857e-135	1.75824	0.951	0.339	3.17882e-131	E30	RPS15
3.01966e-135	0.384432	0.678	0.1	5.85815e-131	E30	PTOV1
3.10744e-135	0.677171	0.763	0.13	6.02843e-131	E30	LGALS3BP
3.14414e-135	0.566565	0.802	0.139	6.09963e-131	E30	PFDN2
3.76178e-135	1.05958	0.88	0.19	7.29786e-131	E30	CNBP
5.63482e-135	0.253629	0.65	0.091	1.09315e-130	E30	COPZ1
5.84313e-135	0.963129	0.894	0.184	1.13357e-130	E30	TRIM25
5.90623e-135	0.772161	0.83	0.157	1.14581e-130	E30	ENY2
7.17027e-135	0.326903	0.686	0.101	1.39103e-130	E30	STRAP
1.24613e-134	1.38742	0.943	0.26	2.41749e-130	E30	HNRNPA1
2.00575e-134	0.34394	0.565	0.071	3.89116e-130	E30	BCAS2
2.29988e-134	0.715385	0.866	0.165	4.46178e-130	E30	ARPC1B
2.56819e-134	0.342509	0.71	0.109	4.98228e-130	E30	DNAJC5
3.44225e-134	0.257727	0.435	0.041	6.67796e-130	E30	SLC41A1
3.86276e-134	0.615752	0.799	0.14	7.49376e-130	E30	C6H4orf3
4.22779e-134	0.297732	0.456	0.046	8.2019e-130	E30	CCN2
4.64814e-134	1.25854	0.933	0.227	9.01739e-130	E30	DNAJA1
5.16447e-134	0.396879	0.608	0.082	1.00191e-129	E30	SLC37A2
5.70235e-134	0.358893	0.244	0.009	1.10626e-129	E30	NES
1.06418e-133	0.289775	0.516	0.059	2.0645e-129	E30	YBX3
1.12718e-133	0.394525	0.774	0.128	2.18673e-129	E30	IRF5
1.67611e-133	1.49442	1	0.371	3.25165e-129	E30	ATP6
1.81883e-133	0.397396	0.357	0.027	3.52852e-129	E30	KIF22
1.91702e-133	0.400597	0.396	0.034	3.71903e-129	E30	MCM3
2.16351e-133	1.23351	0.88	0.199	4.19722e-129	E30	NCL
2.72796e-133	1.80658	0.975	0.381	5.29224e-129	E30	HSP90AB1
6.9584e-133	2.14556	0.968	0.457	1.34993e-128	E30	RPL13A
1.02756e-132	0.623776	0.82	0.149	1.99347e-128	E30	SUCLG1
1.3932e-132	0.868428	0.845	0.168	2.70281e-128	E30	EIF3G
1.52511e-132	0.503133	0.742	0.122	2.95872e-128	E30	TRIM28
1.64529e-132	0.448417	0.721	0.115	3.19185e-128	E30	PFDN4
2.21351e-132	0.299697	0.541	0.066	4.29421e-128	E30	MFAP1
2.27293e-132	0.658918	0.58	0.079	4.40948e-128	E30	SMC2
2.88947e-132	1.52435	0.94	0.294	5.60558e-128	E30	RPL38
2.95515e-132	0.281441	0.445	0.045	5.73299e-128	E30	PCP4L1
4.4839e-132	0.385094	0.572	0.075	8.69877e-128	E30	CD109
7.82274e-132	0.687645	0.795	0.142	1.51761e-127	E30	TOMM20
8.5626e-132	0.301122	0.618	0.086	1.66114e-127	E30	AGPAT1
8.84953e-132	0.277803	0.64	0.091	1.71681e-127	E30	ESD
9.77329e-132	0.300531	0.682	0.103	1.89602e-127	E30	DTD1
1.06965e-131	0.319721	0.664	0.097	2.07513e-127	E30	UBE2V2
1.20526e-131	0.342319	0.731	0.116	2.3382e-127	E30	UTP14A
1.45471e-131	0.404335	0.59	0.079	2.82213e-127	E30	POLD4
1.54534e-131	0.808337	0.77	0.142	2.99795e-127	E30	FXYD5
2.9761e-131	0.317455	0.449	0.046	5.77364e-127	E30	MND1
3.24157e-131	0.737223	0.841	0.162	6.28865e-127	E30	RBM8A
3.82775e-131	1.6097	0.961	0.344	7.42584e-127	E30	RPL37A
5.25466e-131	1.63531	0.961	0.35	1.0194e-126	E30	RPL21
8.88834e-131	0.273978	0.587	0.078	1.72434e-126	E30	TUFM
1.22755e-130	0.366338	0.675	0.102	2.38145e-126	E30	FAM78A
1.44591e-130	0.703185	0.481	0.055	2.80507e-126	E30	NR4A1
1.65852e-130	0.809889	0.813	0.155	3.21753e-126	E30	EIF2AK2
1.89364e-130	0.84627	0.845	0.168	3.67367e-126	E30	EIF4EBP1
2.90989e-130	0.336738	0.682	0.104	5.64518e-126	E30	GRINA
3.50639e-130	0.483095	0.382	0.033	6.80239e-126	E30	NUF2
4.79494e-130	1.642	0.926	0.32	9.30218e-126	E30	RPS17
5.21828e-130	0.2907	0.463	0.049	1.01235e-125	E30	PPA1
5.46463e-130	0.304233	0.636	0.092	1.06014e-125	E30	DOK2
5.878e-130	0.654143	0.774	0.137	1.14033e-125	E30	PSMA2
5.93768e-130	0.521401	0.739	0.123	1.15191e-125	E30	PSMD2
6.01081e-130	0.250935	0.597	0.081	1.1661e-125	E30	BAX
7.53948e-130	1.09787	0.862	0.181	1.46266e-125	E30	IFRD1
8.62403e-130	0.440541	0.65	0.097	1.67306e-125	E30	BLOC1S2
8.80297e-130	0.683942	0.841	0.161	1.70778e-125	E30	PPP2R1A
1.06683e-129	1.71451	0.989	0.424	2.06964e-125	E30	RPL13
1.1375e-129	0.770357	0.82	0.157	2.20676e-125	E30	ATOX1
1.32049e-129	0.315608	0.597	0.082	2.56175e-125	E30	TSPAN17
1.59786e-129	0.916834	0.876	0.186	3.09986e-125	E30	DDOST
1.78247e-129	0.376545	0.686	0.106	3.458e-125	E30	SHC1
1.82268e-129	0.692776	0.862	0.167	3.536e-125	E30	RAB7A
2.00942e-129	0.258105	0.498	0.057	3.89827e-125	E30	CAMLG
2.13312e-129	1.40826	0.954	0.281	4.13826e-125	E30	JUN
3.52269e-129	0.50299	0.749	0.126	6.83401e-125	E30	DNAJB11
7.3139e-129	2.2403	1	0.807	1.4189e-124	E30	ACTB
8.56779e-129	1.2442	0.82	0.172	1.66215e-124	E30	ENSBTAG00000022489
1.19617e-128	1.28326	0.908	0.243	2.32056e-124	E30	GNG5
1.58644e-128	0.514881	0.784	0.138	3.0777e-124	E30	RNPS1
1.66518e-128	1.28089	0.912	0.252	3.23046e-124	E30	GNB2
1.90436e-128	0.608974	0.77	0.138	3.69447e-124	E30	CD83
2.04798e-128	1.87994	0.975	0.465	3.97309e-124	E30	RPL11
3.53768e-128	0.970598	0.848	0.183	6.86309e-124	E30	SSR3
5.79975e-128	3.41562	0.59	0.098	1.12515e-123	E30	CCL8
6.14243e-128	1.90785	0.958	0.443	1.19163e-123	E30	MYL6
1.06244e-127	0.295667	0.611	0.086	2.06113e-123	E30	ERGIC3
1.33292e-127	0.331063	0.569	0.076	2.58586e-123	E30	EHD1
1.34381e-127	0.483727	0.788	0.139	2.60699e-123	E30	SRSF3
1.53077e-127	0.457526	0.753	0.128	2.9697e-123	E30	MAP1LC3B
2.0952e-127	0.369015	0.307	0.02	4.06469e-123	E30	SLC7A5
2.61705e-127	0.303637	0.392	0.035	5.07707e-123	E30	SOX4
3.18133e-127	0.421188	0.555	0.073	6.17178e-123	E30	LMNB1
3.1877e-127	0.530298	0.795	0.143	6.18413e-123	E30	EIF3CL
6.44351e-127	0.319874	0.187	0.004	1.25004e-122	E30	LTB4R
8.31945e-127	0.305248	0.65	0.097	1.61397e-122	E30	ACOT7
8.88225e-127	1.62601	0.922	0.285	1.72316e-122	E30	TAGLN2
1.11754e-126	0.284578	0.519	0.064	2.16803e-122	E30	RAB8A
2.44293e-126	0.450059	0.403	0.039	4.73929e-122	E30	LSMEM1
2.8133e-126	1.34049	0.859	0.21	5.4578e-122	E30	CORO1A
3.28228e-126	0.330622	0.633	0.093	6.36762e-122	E30	RER1
3.52988e-126	1.0443	0.866	0.195	6.84797e-122	E30	TALDO1
7.53214e-126	0.357985	0.516	0.064	1.46124e-121	E30	CCDC88C
1.55625e-125	0.532622	0.795	0.144	3.01913e-121	E30	ACTN1
2.06112e-125	0.27983	0.498	0.06	3.99857e-121	E30	JMJD6
2.58742e-125	1.22986	0.488	0.061	5.01959e-121	E30	NCALD
3.15544e-125	1.5543	1	0.402	6.12155e-121	E30	COX2
9.19355e-125	0.633756	0.548	0.075	1.78355e-120	E30	GADD45B
1.18216e-124	0.292597	0.576	0.079	2.29338e-120	E30	SLC16A1
1.58213e-124	0.25074	0.389	0.036	3.06933e-120	E30	CYB5A
2.30273e-124	1.71314	1	0.502	4.46729e-120	E30	COX3
2.85919e-124	0.296071	0.682	0.108	5.54683e-120	E30	CTNNBIP1
2.89361e-124	0.568188	0.845	0.163	5.6136e-120	E30	TMEM50A
2.90608e-124	0.650784	0.781	0.146	5.6378e-120	E30	PSMA1
5.48765e-124	1.80262	0.979	0.449	1.0646e-119	E30	RPL23
8.83523e-124	0.502345	0.756	0.134	1.71404e-119	E30	RHOG
1.03446e-123	0.339732	0.551	0.074	2.00685e-119	E30	USP1
1.12975e-123	0.279975	0.682	0.108	2.19171e-119	E30	MRPS14
1.36569e-123	0.258031	0.58	0.08	2.64944e-119	E30	USP14
1.5403e-123	0.287135	0.527	0.067	2.98818e-119	E30	PML
1.57649e-123	1.41243	0.94	0.298	3.05838e-119	E30	RPL23A
2.31734e-123	0.674122	0.82	0.161	4.49565e-119	E30	MKKS
2.4112e-123	0.535317	0.813	0.151	4.67772e-119	E30	PSMA5
3.14714e-123	1.51329	0.88	0.223	6.10545e-119	E30	HSPH1
4.01329e-123	1.6611	0.975	0.467	7.78578e-119	E30	RPLP2
4.45666e-123	0.408906	0.77	0.135	8.64593e-119	E30	FKBP2
7.33538e-123	2.49855	0.989	0.752	1.42306e-118	E30	TMSB4X
8.47874e-123	1.12332	0.929	0.239	1.64488e-118	E30	ATP5F1B
9.19327e-123	1.5971	0.951	0.394	1.78349e-118	E30	EIF4A1
1.42688e-122	0.264866	0.622	0.092	2.76815e-118	E30	IRF9
1.79925e-122	2.54763	0.989	0.593	3.49055e-118	E30	SPP1
1.87996e-122	0.283153	0.625	0.094	3.64712e-118	E30	PPIC
2.01628e-122	0.541093	0.767	0.14	3.91159e-118	E30	MGAT4B
2.65192e-122	0.25387	0.587	0.083	5.14472e-118	E30	UFM1
3.0855e-122	0.412936	0.364	0.032	5.98587e-118	E30	UHRF1
4.94363e-122	0.272616	0.329	0.025	9.59064e-118	E30	RBM38
9.56588e-122	0.264775	0.304	0.021	1.85578e-117	E30	AURKA
9.93364e-122	0.655928	0.827	0.16	1.92713e-117	E30	GABARAPL2
1.0346e-121	0.265176	0.661	0.103	2.00712e-117	E30	ILK
1.42018e-121	1.29549	0.947	0.289	2.75514e-117	E30	RPS16
1.65632e-121	0.388031	0.728	0.123	3.21325e-117	E30	LRPAP1
1.87205e-121	0.262498	0.339	0.027	3.63177e-117	E30	GATM
2.68997e-121	0.420395	0.724	0.124	5.21854e-117	E30	VPS36
2.85602e-121	1.10396	0.876	0.205	5.54068e-117	E30	AIF1
2.92719e-121	0.419439	0.622	0.095	5.67875e-117	E30	FAM162A
3.40728e-121	0.267303	0.562	0.078	6.61012e-117	E30	HSPA9
4.55136e-121	0.387459	0.749	0.13	8.82964e-117	E30	EMC10
4.78542e-121	0.306498	0.657	0.103	9.28371e-117	E30	LARP7
5.72214e-121	0.33848	0.696	0.115	1.11009e-116	E30	SRP19
7.44954e-121	1.32005	0.926	0.273	1.44521e-116	E30	CFP
1.44107e-120	0.28737	0.636	0.098	2.79568e-116	E30	USF2
1.61717e-120	1.21824	0.933	0.264	3.13731e-116	E30	ANP32B
1.86015e-120	0.352466	0.657	0.105	3.60868e-116	E30	SH3BP1
1.95369e-120	0.304435	0.633	0.097	3.79015e-116	E30	PTP4A1
1.99824e-120	0.776338	0.873	0.185	3.87658e-116	E30	COX6C
2.82679e-120	0.255126	0.534	0.071	5.48398e-116	E30	CMC2
4.43568e-120	0.351167	0.728	0.124	8.60522e-116	E30	PSMC1
5.14057e-120	0.619786	0.834	0.166	9.9727e-116	E30	U2AF1
7.86125e-120	0.518552	0.784	0.146	1.52508e-115	E30	MESD
8.73553e-120	0.278432	0.721	0.121	1.69469e-115	E30	SDF4
1.14033e-119	0.332648	0.671	0.109	2.21224e-115	E30	FKBP4
1.50621e-119	1.71316	0.951	0.398	2.92205e-115	E30	EIF1
2.23903e-119	0.417875	0.756	0.135	4.34373e-115	E30	RAP2B
2.65933e-119	0.303267	0.678	0.111	5.15911e-115	E30	ISCA1
4.0267e-119	0.460519	0.491	0.062	7.81179e-115	E30	MYO1B
4.15662e-119	0.29975	0.339	0.028	8.06384e-115	E30	AURKB
5.8478e-119	0.443513	0.77	0.141	1.13447e-114	E30	RBBP4
7.31276e-119	0.272396	0.265	0.015	1.41868e-114	E30	KIF20A
3.18669e-118	0.384926	0.731	0.129	6.18219e-114	E30	CYB5R3
5.58389e-118	0.326195	0.678	0.112	1.08328e-113	E30	SMIM7
7.49718e-118	1.0588	0.929	0.237	1.45445e-113	E30	ST13
1.01952e-117	0.625623	0.862	0.177	1.97787e-113	E30	MAPRE1
1.09186e-117	1.40152	0.894	0.242	2.1182e-113	E30	PGAM1
1.14846e-117	0.323011	0.65	0.104	2.228e-113	E30	EIF4A3
1.3842e-117	0.575194	0.788	0.151	2.68534e-113	E30	PSMD7
1.67798e-117	0.273679	0.537	0.073	3.25527e-113	E30	ETHE1
5.58824e-117	0.325896	0.251	0.013	1.08412e-112	E30	PEG10
5.59046e-117	0.395292	0.784	0.145	1.08455e-112	E30	ANP32A
7.15885e-117	0.467617	0.491	0.063	1.38882e-112	E30	CLU
1.17475e-116	0.281124	0.636	0.101	2.27902e-112	E30	TMEM11
1.21713e-116	0.304138	0.534	0.073	2.36124e-112	E30	MYC
1.23317e-116	0.397655	0.739	0.133	2.39234e-112	E30	SLC39A1
3.244e-116	0.628475	0.813	0.164	6.29336e-112	E30	BRK1
3.89956e-116	0.419255	0.541	0.076	7.56515e-112	E30	ACAT2
5.19747e-116	0.252337	0.664	0.108	1.00831e-111	E30	DNAJA2
6.69982e-116	2.06933	0.965	0.545	1.29977e-111	E30	FTL
6.95431e-116	0.367568	0.777	0.144	1.34914e-111	E30	BAG6
7.43915e-116	1.68743	0.965	0.461	1.4432e-111	E30	RPS19
1.61582e-115	1.64546	0.972	0.477	3.1347e-111	E30	CALM1
1.72196e-115	0.328977	0.466	0.057	3.34061e-111	E30	TMIGD3
2.29484e-115	0.27341	0.558	0.08	4.45198e-111	E30	CBX5
2.5218e-115	0.409551	0.71	0.125	4.89229e-111	E30	RGS19
2.62944e-115	0.605847	0.763	0.147	5.10111e-111	E30	IER3IP1
3.29648e-115	0.588242	0.837	0.171	6.39517e-111	E30	NONO
5.10848e-115	0.378097	0.71	0.125	9.91046e-111	E30	LXN
5.34479e-115	0.651136	0.77	0.152	1.03689e-110	E30	SRI
1.24772e-114	1.07052	0.869	0.219	2.42057e-110	E30	ARL6IP5
1.38214e-114	0.297297	0.675	0.113	2.68136e-110	E30	CHP1
1.3883e-114	1.35482	0.894	0.263	2.6933e-110	E30	TYROBP
1.82159e-114	1.00605	0.89	0.226	3.53389e-110	E30	WDR1
2.12394e-114	0.40421	0.77	0.144	4.12044e-110	E30	SERP1
3.21975e-114	0.407051	0.477	0.061	6.24631e-110	E30	TAGAP
3.86986e-114	0.402793	0.753	0.138	7.50753e-110	E30	EIF3L
7.16994e-114	1.55546	0.933	0.339	1.39097e-109	E30	FCER1G
8.02052e-114	1.68777	0.576	0.099	1.55598e-109	E30	DEFB4A
8.62013e-113	1.27862	0.989	0.319	1.67231e-108	E30	ND3
1.58317e-112	0.409778	0.777	0.147	3.07136e-108	E30	ATIC
1.62765e-112	0.666478	0.329	0.028	3.15764e-108	E30	RGCC
1.9053e-112	0.413874	0.565	0.085	3.69628e-108	E30	TRANK1
2.3298e-112	0.251686	0.689	0.118	4.51981e-108	E30	ENSBTAG00000046172
2.53296e-112	0.331807	0.594	0.093	4.91395e-108	E30	NUDT4
3.82117e-112	0.342045	0.746	0.135	7.41308e-108	E30	RBBP7
4.50561e-112	0.251129	0.611	0.097	8.74087e-108	E30	PYURF
7.24895e-112	1.42899	0.933	0.365	1.4063e-107	E30	H3-3A
9.54169e-112	0.466952	0.742	0.14	1.85109e-107	E30	NTAN1
1.30659e-111	0.263436	0.601	0.094	2.53478e-107	E30	MYD88
1.57918e-111	0.31626	0.671	0.115	3.06361e-107	E30	OARD1
1.96545e-111	0.297182	0.714	0.127	3.81298e-107	E30	WBP11
3.1308e-111	0.287258	0.7	0.122	6.07376e-107	E30	SRP72
3.18043e-111	0.876844	0.873	0.21	6.17003e-107	E30	RAB5C
3.52143e-111	0.271207	0.682	0.118	6.83157e-107	E30	MCRIP1
5.6302e-111	1.23321	0.94	0.288	1.09226e-106	E30	RPL4
6.99409e-111	0.41366	0.452	0.056	1.35685e-106	E30	ABCG1
2.48231e-110	0.513112	0.749	0.144	4.81568e-106	E30	IDH2
2.83878e-110	1.87781	0.989	0.562	5.50724e-106	E30	HSP90AA1
3.6507e-110	0.333912	0.385	0.041	7.08235e-106	E30	FBXL2
4.21348e-110	0.381421	0.763	0.144	8.17415e-106	E30	TCEA1
4.76981e-110	2.69311	0.972	0.503	9.25343e-106	E30	GAPDH
5.89329e-110	0.37151	0.724	0.133	1.1433e-105	E30	CHMP3
7.84148e-110	0.282173	0.636	0.105	1.52125e-105	E30	NDUFV3
8.33427e-110	0.63005	0.855	0.186	1.61685e-105	E30	EIF3D
8.52195e-110	0.253056	0.261	0.016	1.65326e-105	E30	CCNA2
1.3044e-109	0.314582	0.629	0.104	2.53054e-105	E30	SMC1A
2.08256e-109	0.394483	0.746	0.141	4.04016e-105	E30	HNRNPUL1
5.98007e-109	0.250346	0.41	0.047	1.16013e-104	E30	CA2
6.28314e-109	0.311573	0.802	0.157	1.21893e-104	E30	ZC3H15
1.17898e-108	0.564333	0.788	0.161	2.28722e-104	E30	ACAA1
1.34804e-108	0.383865	0.703	0.128	2.61521e-104	E30	HEBP1
1.3493e-108	1.53759	0.958	0.492	2.61764e-104	E30	CD63
2.6705e-108	0.685799	0.845	0.186	5.18076e-104	E30	CCT3
2.78143e-108	0.395314	0.784	0.153	5.39597e-104	E30	ADGRL2
2.99825e-108	0.600824	0.806	0.167	5.8166e-104	E30	CIRBP
3.10527e-108	0.34357	0.746	0.14	6.02423e-104	E30	COPG1
7.43498e-108	0.750099	0.848	0.194	1.44239e-103	E30	DAD1
9.57551e-108	0.383638	0.767	0.149	1.85765e-103	E30	RTF1
1.06528e-107	0.251063	0.643	0.109	2.06663e-103	E30	ACAA2
1.47374e-107	1.55042	0.982	0.525	2.85905e-103	E30	RPS28
1.85589e-107	0.306023	0.569	0.089	3.60042e-103	E30	IER2
3.55609e-107	0.76985	0.862	0.202	6.89882e-103	E30	KDELR2
4.04373e-107	0.251694	0.548	0.083	7.84484e-103	E30	SMAGP
7.34491e-107	0.26603	0.208	0.009	1.42491e-102	E30	H2AC12
7.99193e-107	0.497533	0.41	0.048	1.55044e-102	E30	QPCT
8.3544e-107	0.403591	0.625	0.107	1.62075e-102	E30	DDIT3
8.91354e-107	0.261554	0.64	0.108	1.72923e-102	E30	NRAS
1.00978e-106	0.258356	0.534	0.079	1.95897e-102	E30	ENSBTAG00000052466
1.06061e-106	0.924867	0.908	0.23	2.05758e-102	E30	CCT4
1.9626e-106	0.410242	0.731	0.14	3.80745e-102	E30	RRAGC
2.22491e-106	0.274992	0.625	0.105	4.31633e-102	E30	SLC31A1
2.47927e-106	0.296821	0.29	0.023	4.80979e-102	E30	KNSTRN
2.67e-106	0.641567	0.837	0.184	5.17979e-102	E30	PNRC2
3.52261e-106	0.270442	0.572	0.091	6.83386e-102	E30	ARF2
4.1731e-106	0.294244	0.293	0.023	8.09581e-102	E30	CDC20
4.88199e-106	0.25379	0.717	0.132	9.47106e-102	E30	NCOA4
5.07061e-106	0.809511	0.869	0.209	9.83698e-102	E30	SDHB
7.52813e-106	0.692789	0.841	0.192	1.46046e-101	E30	SOD1
7.75103e-106	-2.57429	0.908	0.942	1.5037e-101	E30	TRPS1
8.45838e-106	0.285205	0.502	0.071	1.64093e-101	E30	MCM6
8.67392e-106	0.490765	0.742	0.146	1.68274e-101	E30	CYB5B
1.04516e-105	0.568876	0.664	0.123	2.02761e-101	E30	ENSBTAG00000050122
1.54965e-105	0.863452	0.848	0.205	3.00632e-101	E30	HMOX1
1.90472e-105	0.353799	0.633	0.11	3.69516e-101	E30	POLR2A
1.98861e-105	0.286198	0.731	0.138	3.85791e-101	E30	PSMD4
2.26344e-105	0.365645	0.76	0.148	4.39107e-101	E30	GSTT1
4.05702e-105	0.253563	0.261	0.018	7.87062e-101	E30	CALML5
4.22576e-105	0.405664	0.29	0.023	8.19797e-101	E30	CCNB1
6.71653e-105	0.272816	0.583	0.095	1.30301e-100	E30	NFKBIB
1.12702e-104	0.415219	0.777	0.156	2.18643e-100	E30	RPL7L1
1.55907e-104	0.393323	0.265	0.019	3.0246e-100	E30	FCGR3A
3.78038e-104	0.303651	0.597	0.1	7.33393e-100	E30	TPP1
4.44937e-104	0.266506	0.336	0.032	8.63178e-100	E30	PTGR1
1.48887e-103	0.253349	0.276	0.021	2.88841e-99	E30	CDKN3
1.54012e-103	1.01309	0.905	0.249	2.98783e-99	E30	ZYX
1.57739e-103	0.282393	0.505	0.074	3.06013e-99	E30	PIM3
1.66431e-103	0.994037	0.876	0.24	3.22875e-99	E30	ARPC4
3.56073e-103	1.04214	0.855	0.224	6.90781e-99	E30	RABAC1
3.69247e-103	0.371105	0.675	0.126	7.1634e-99	E30	SHMT2
3.75593e-103	0.464527	0.742	0.149	7.28651e-99	E30	HDGF
8.55772e-103	0.402944	0.346	0.035	1.6602e-98	E30	COL18A1
1.84223e-102	0.304387	0.382	0.044	3.57392e-98	E30	CCND1
2.27284e-102	0.388881	0.76	0.151	4.40932e-98	E30	VTI1B
2.74836e-102	1.80352	0.194	0.008	5.33183e-98	E30	CCL17
3.07569e-102	0.350115	0.618	0.108	5.96684e-98	E30	PGM3
3.36226e-102	0.266085	0.519	0.079	6.52278e-98	E30	KLF11
4.06869e-102	0.745681	0.806	0.187	7.89327e-98	E30	FKBP1A
1.02968e-101	0.340821	0.717	0.138	1.99757e-97	E30	LSG1
1.10642e-101	0.308736	0.753	0.148	2.14645e-97	E30	SEC13
1.26886e-101	0.747415	0.83	0.196	2.46158e-97	E30	TMED9
1.59784e-101	1.08385	0.933	0.265	3.0998e-97	E30	UBC
1.83765e-101	0.259396	0.428	0.055	3.56504e-97	E30	ZNF507
2.1456e-101	0.811246	0.855	0.214	4.16246e-97	E30	H2AJ
2.79403e-101	0.354478	0.753	0.15	5.42042e-97	E30	GLRX3
5.99949e-101	0.323705	0.731	0.143	1.1639e-96	E30	GHITM
6.00439e-101	0.687596	0.88	0.214	1.16485e-96	E30	CCT8
1.02685e-100	1.25122	0.905	0.306	1.9921e-96	E30	RPS15A
1.45615e-100	0.467423	0.537	0.087	2.82494e-96	E30	TES
2.67141e-100	1.05133	0.618	0.12	5.18253e-96	E30	TPM2
3.92202e-100	0.914571	0.721	0.156	7.60872e-96	E30	PRKCQ
4.90524e-100	0.289475	0.597	0.103	9.51616e-96	E30	SKP1
7.52079e-100	0.459656	0.813	0.175	1.45903e-95	E30	UCHL3
2.17545e-99	0.258371	0.541	0.087	4.22038e-95	E30	ARL4A
2.19131e-99	0.608749	0.76	0.165	4.25114e-95	E30	NASP
3.33309e-99	0.385454	0.633	0.116	6.4662e-95	E30	RRP12
9.74443e-99	0.525585	0.767	0.163	1.89042e-94	E30	PDIA4
1.03585e-98	0.920522	0.382	0.047	2.00955e-94	E30	MKI67
1.42295e-98	0.262678	0.703	0.135	2.76053e-94	E30	ARPP19
1.56768e-98	0.352527	0.735	0.147	3.04131e-94	E30	AGTRAP
1.78279e-98	1.68237	0.979	0.571	3.45862e-94	E30	HSPA8
1.89445e-98	0.683052	0.866	0.204	3.67524e-94	E30	ARL6IP1
4.08079e-98	1.4891	0.958	0.405	7.91672e-94	E30	ANXA5
5.36989e-98	0.281564	0.597	0.104	1.04176e-93	E30	TMPO
7.15394e-98	0.62491	0.76	0.159	1.38786e-93	E30	FN1
9.75117e-98	0.437908	0.77	0.164	1.89173e-93	E30	EIF2S2
1.96493e-97	0.66107	0.845	0.204	3.81196e-93	E30	VAMP8
3.23173e-97	0.289905	0.668	0.127	6.26956e-93	E30	IFRD2
4.31314e-97	0.30672	0.71	0.14	8.36749e-93	E30	ZCCHC17
5.17089e-97	1.36169	0.89	0.314	1.00315e-92	E30	FOLR2
1.40529e-96	0.37197	0.269	0.022	2.72626e-92	E30	IL3RA
1.42056e-96	1.39775	0.958	0.429	2.75589e-92	E30	CALR
1.78053e-96	1.05832	0.919	0.268	3.45423e-92	E30	EZR
4.09093e-96	0.261879	0.678	0.13	7.9364e-92	E30	ARID3A
6.88627e-96	0.79935	0.859	0.222	1.33594e-91	E30	BCAP31
9.53018e-96	0.511979	0.799	0.178	1.84886e-91	E30	CNIH4
9.87921e-96	0.758409	0.912	0.236	1.91657e-91	E30	SEPTIN2
1.40691e-95	1.3782	0.943	0.384	2.72941e-91	E30	CALM2
1.75305e-95	0.285534	0.396	0.05	3.40091e-91	E30	H2BC14
2.97085e-95	0.433475	0.36	0.042	5.76345e-91	E30	WHRN
4.9452e-95	0.346873	0.668	0.13	9.59368e-91	E30	MARCKSL1
6.32433e-95	0.274878	0.714	0.143	1.22692e-90	E30	TAPBP
6.64699e-95	1.55647	0.41	0.058	1.28952e-90	E30	EBD
7.58582e-95	0.360522	0.488	0.076	1.47165e-90	E30	H1-2
1.09977e-94	0.913034	0.912	0.264	2.13355e-90	E30	PSMB2
2.62378e-94	0.493274	0.774	0.17	5.09013e-90	E30	SELENOS
2.69001e-94	1.25955	0.947	0.406	5.21861e-90	E30	TPM3
3.38605e-94	0.32486	0.657	0.127	6.56893e-90	E30	OAT
4.16351e-94	0.339265	0.657	0.128	8.07722e-90	E30	DPYSL2
6.3985e-94	0.343657	0.742	0.155	1.24131e-89	E30	SEC61A1
1.07335e-93	1.11387	0.926	0.276	2.08231e-89	E30	SQSTM1
1.36347e-93	0.461538	0.802	0.18	2.64513e-89	E30	COMMD3
2.06279e-93	0.380559	0.389	0.05	4.00181e-89	E30	NCAPG
2.56595e-93	0.38234	0.597	0.111	4.97794e-89	E30	MCM7
4.16318e-93	0.671416	0.823	0.203	8.07656e-89	E30	NINJ1
1.16513e-92	-2.23902	0.806	0.912	2.26034e-88	E30	DPYD
1.68908e-92	0.618221	0.862	0.216	3.27681e-88	E30	NDUFV2
5.53596e-92	0.251832	0.29	0.027	1.07398e-87	E30	SNAI1
6.65368e-92	1.83578	1	0.87	1.29081e-87	E30	FTH1
8.11921e-92	0.82907	0.898	0.243	1.57513e-87	E30	HERPUD1
1.10595e-91	0.905381	0.855	0.228	2.14555e-87	E30	EPSTI1
2.19426e-91	0.381552	0.799	0.179	4.25687e-87	E30	NUCB1
3.84955e-91	0.722038	0.823	0.203	7.46813e-87	E30	PTPN6
5.26444e-91	0.75542	0.862	0.226	1.0213e-86	E30	CCT2
6.14817e-91	0.321068	0.336	0.038	1.19275e-86	E30	MEIS1
7.55749e-91	1.56556	0.965	0.376	1.46615e-86	E30	HSPA5
1.01925e-90	0.635078	0.753	0.171	1.97734e-86	E30	ATF3
1.07742e-90	0.360377	0.71	0.15	2.09019e-86	E30	BIN1
1.62674e-90	0.344914	0.569	0.104	3.15588e-86	E30	FERMT2
2.1495e-90	0.385668	0.717	0.152	4.17004e-86	E30	RAB9A
1.1074e-89	0.28986	0.177	0.008	2.14835e-85	E30	PCBP3
1.79528e-89	1.33185	0.887	0.311	3.48283e-85	E30	RNASE6
1.87925e-89	0.282447	0.371	0.047	3.64575e-85	E30	PRC1
2.15815e-89	0.430492	0.827	0.191	4.18682e-85	E30	DCTN2
2.28825e-89	0.611272	0.901	0.232	4.43921e-85	E30	EIF4H
4.89027e-89	0.521439	0.859	0.209	9.48713e-85	E30	PTTG1IP
5.61373e-89	0.692727	0.89	0.233	1.08906e-84	E30	LAMTOR4
8.26619e-89	0.28003	0.76	0.164	1.60364e-84	E30	DDX24
9.79481e-89	0.684017	0.396	0.056	1.90019e-84	E30	MS4A8
1.164e-88	1.00139	0.456	0.075	2.25817e-84	E30	CENPF
1.64788e-88	0.923406	0.484	0.083	3.19689e-84	E30	NUPR1
3.00614e-88	0.382989	0.83	0.192	5.83191e-84	E30	DBNL
3.23381e-88	0.384338	0.29	0.029	6.27358e-84	E30	OSGIN1
3.28563e-88	1.12667	0.915	0.324	6.37413e-84	E30	BZW1
3.63578e-88	0.387827	0.809	0.188	7.05342e-84	E30	C15H11orf58
3.78497e-88	0.973937	0.926	0.285	7.34284e-84	E30	NUCKS1
4.85253e-88	0.268723	0.756	0.166	9.4139e-84	E30	IMPA1
5.05077e-88	0.460039	0.795	0.187	9.79849e-84	E30	VDAC1
6.11368e-88	0.250602	0.693	0.144	1.18605e-83	E30	SARAF
6.47658e-88	0.438941	0.816	0.191	1.25646e-83	E30	EIF2S3
9.81858e-88	1.37719	0.968	0.373	1.9048e-83	E30	KLF6
1.18873e-87	0.514824	0.767	0.178	2.30615e-83	E30	CYP27A1
3.96192e-87	0.321728	0.696	0.148	7.68612e-83	E30	DKC1
5.35574e-87	-2.08799	0.922	0.917	1.03901e-82	E30	RBM47
5.52974e-87	1.51835	0.852	0.315	1.07277e-82	E30	C1QB
5.6785e-87	0.972413	0.926	0.315	1.10163e-82	E30	P4HB
7.34874e-87	0.313528	0.191	0.011	1.42565e-82	E30	LILRA4
1.0298e-86	0.316538	0.841	0.195	1.9978e-82	E30	CHMP4B
2.80853e-86	0.275541	0.71	0.152	5.44855e-82	E30	NT5DC2
4.80182e-86	0.315129	0.23	0.017	9.31553e-82	E30	PDLIM1
4.90504e-86	0.276326	0.59	0.113	9.51578e-82	E30	ARHGAP4
6.64669e-86	0.944832	0.887	0.269	1.28946e-81	E30	DEK
1.18393e-85	0.5229	0.756	0.175	2.29682e-81	E30	SEPTIN11
1.5657e-85	0.809859	0.915	0.269	3.03745e-81	E30	RNH1
1.69874e-85	0.546687	0.523	0.096	3.29555e-81	E30	RFX2
2.48495e-85	1.12591	0.922	0.345	4.8208e-81	E30	REEP5
3.06085e-85	0.570995	0.866	0.223	5.93805e-81	E30	DEGS1
1.09845e-84	0.392485	0.47	0.08	2.13099e-80	E30	CSF1
3.05642e-84	0.286355	0.693	0.149	5.92946e-80	E30	UPF3B
3.21738e-84	-4.50337	0.431	0.808	6.24173e-80	E30	PDE7B
4.6935e-84	0.483666	0.565	0.112	9.10539e-80	E30	ENSBTAG00000020684
5.98081e-84	0.286585	0.481	0.082	1.16028e-79	E30	NAAA
7.40203e-84	0.345467	0.76	0.174	1.43599e-79	E30	FADS6
8.36905e-84	0.270821	0.792	0.183	1.62359e-79	E30	SMARCE1
8.92774e-84	0.255439	0.728	0.16	1.73198e-79	E30	NOP56
2.20523e-83	0.752452	0.509	0.096	4.27815e-79	E30	ENSBTAG00000034366
3.93034e-83	0.455258	0.774	0.183	7.62486e-79	E30	SULT1A1
4.17014e-83	0.594365	0.859	0.226	8.09008e-79	E30	ATP6V1E1
1.52286e-82	0.831694	0.894	0.272	2.95435e-78	E30	SERBP1
3.83937e-82	0.299349	0.583	0.116	7.44837e-78	E30	TOB2
5.48981e-82	0.622678	0.88	0.238	1.06502e-77	E30	ATP6AP2
6.19888e-82	0.421019	0.816	0.201	1.20258e-77	E30	LMAN2
7.27165e-82	0.272206	0.357	0.048	1.4107e-77	E30	CENPA
9.78379e-82	0.48501	0.247	0.023	1.89805e-77	E30	ALPL
1.22475e-81	0.408032	0.809	0.198	2.37602e-77	E30	BNIP3L
1.60139e-81	0.38339	0.473	0.082	3.10671e-77	E30	C15H11orf96
1.95871e-81	0.4339	0.862	0.218	3.79989e-77	E30	NECAP2
2.37033e-81	0.411644	0.795	0.195	4.59844e-77	E30	MTCH1
5.20503e-81	0.543575	0.314	0.038	1.00978e-76	E30	EGLN3
6.04551e-81	0.617829	0.855	0.228	1.17283e-76	E30	RRBP1
9.85049e-81	0.529653	0.816	0.207	1.91099e-76	E30	ITM2C
1.07555e-80	0.305282	0.742	0.171	2.08658e-76	E30	FDX1
8.14097e-79	0.370107	0.682	0.157	1.57935e-74	E30	RND3
1.07709e-78	0.620892	0.912	0.255	2.08956e-74	E30	ZFAND5
1.58477e-78	0.550147	0.788	0.2	3.07445e-74	E30	PSIP1
3.3071e-78	-3.8537	0.177	0.71	6.41578e-74	E30	PLXDC2
3.52246e-78	1.80563	0.951	0.482	6.83358e-74	E30	ENO1
4.69783e-78	1.02498	0.936	0.385	9.11378e-74	E30	YWHAB
4.95373e-78	0.466432	0.834	0.214	9.61023e-74	E30	SDHA
7.28351e-78	0.270209	0.576	0.117	1.413e-73	E30	TRIB1
9.24371e-78	2.85478	0.618	0.177	1.79328e-73	E30	CCL2
1.65038e-77	0.830571	0.912	0.284	3.20174e-73	E30	YWHAQ
1.93006e-77	0.339456	0.746	0.177	3.74432e-73	E30	ATP1B3
2.96838e-77	1.49079	0.788	0.249	5.75865e-73	E30	PNP
3.70931e-77	0.327696	0.714	0.167	7.19606e-73	E30	C2
5.01449e-77	0.479798	0.77	0.194	9.72811e-73	E30	GLUD1
5.77278e-77	0.697319	0.799	0.215	1.11992e-72	E30	JUNB
9.55874e-77	0.895952	0.951	0.319	1.8544e-72	E30	JPT1
1.41115e-76	0.375468	0.739	0.176	2.73763e-72	E30	C25H7orf50
2.57782e-76	0.476586	0.862	0.231	5.00098e-72	E30	BSG
3.92063e-76	0.914961	0.876	0.306	7.60603e-72	E30	ATP5PB
7.43585e-76	1.14673	0.943	0.549	1.44255e-71	E30	FCGRT
5.08434e-75	0.508458	0.848	0.229	9.86362e-71	E30	UBE2N
5.69357e-75	0.488993	0.841	0.227	1.10455e-70	E30	BASP1
1.09343e-74	0.431651	0.869	0.23	2.12126e-70	E30	PPP4C
1.3418e-74	0.431093	0.767	0.194	2.6031e-70	E30	LITAF
2.16971e-74	0.483163	0.445	0.08	4.20924e-70	E30	TPX2
3.32843e-74	0.296636	0.424	0.073	6.45715e-70	E30	MAFF
3.33765e-74	0.348812	0.735	0.181	6.47504e-70	E30	DNMT1
3.58399e-74	0.305999	0.717	0.171	6.95295e-70	E30	BZW2
3.65742e-74	0.337399	0.247	0.025	7.09539e-70	E30	GFRA2
9.52427e-74	0.559722	0.788	0.216	1.84771e-69	E30	GPI
1.71395e-73	0.91563	0.883	0.313	3.32506e-69	E30	CYBA
1.98081e-73	0.321302	0.636	0.146	3.84278e-69	E30	PDGFB
3.17598e-73	1.15952	0.707	0.194	6.1614e-69	E30	CD9
4.05762e-73	0.348653	0.587	0.128	7.87178e-69	E30	GNE
6.25649e-73	0.708976	0.696	0.18	1.21376e-68	E30	CCNYL1
6.73426e-73	0.379701	0.827	0.214	1.30645e-68	E30	SELENOF
7.17143e-73	-1.50917	0.936	0.912	1.39126e-68	E30	VPS13B
7.48907e-73	0.282786	0.177	0.012	1.45288e-68	E30	SCHIP1
8.64175e-73	0.511562	0.375	0.061	1.6765e-68	E30	GPR182
1.38899e-72	0.269527	0.774	0.191	2.69463e-68	E30	ATXN10
2.21442e-72	0.391848	0.724	0.18	4.29597e-68	E30	CAPN2
5.84428e-72	0.292222	0.799	0.203	1.13379e-67	E30	TMED10
6.78813e-72	-3.45848	0.802	0.829	1.3169e-67	E30	FKBP5
1.27296e-71	-2.16079	0.961	0.929	2.46954e-67	E30	RUNX1
2.06626e-71	0.491246	0.841	0.23	4.00854e-67	E30	FAM20C
2.72312e-71	0.630501	0.852	0.253	5.28286e-67	E30	SNX5
4.93322e-71	0.310896	0.788	0.2	9.57045e-67	E30	TMCO1
5.88195e-71	0.504213	0.629	0.151	1.1411e-66	E30	SMC4
7.39415e-71	0.776911	0.908	0.314	1.43447e-66	E30	GNAI2
7.77212e-71	0.314876	0.336	0.05	1.50779e-66	E30	RAMP1
1.75749e-70	0.470638	0.336	0.05	3.40953e-66	E30	TOX
2.24059e-70	0.88548	0.915	0.329	4.34674e-66	E30	CNDP2
3.77577e-70	0.766992	0.802	0.235	7.325e-66	E30	ZFAND2A
5.0386e-70	0.973909	0.399	0.075	9.77488e-66	E30	UPP1
1.01302e-69	0.290165	0.505	0.103	1.96526e-65	E30	KIF23
1.21376e-69	0.374285	0.7	0.175	2.3547e-65	E30	IGFBP4
1.56765e-69	0.499164	0.901	0.268	3.04124e-65	E30	MORF4L2
2.64972e-69	-1.53652	0.975	0.94	5.14047e-65	E30	SGMS1
2.78319e-69	0.306721	0.329	0.048	5.39939e-65	E30	SORBS1
3.28336e-69	0.462186	0.859	0.239	6.36972e-65	E30	SDHC
7.21112e-69	-1.29053	0.979	0.943	1.39896e-64	E30	ZFAND3
7.36991e-69	0.337937	0.777	0.204	1.42976e-64	E30	TMED2
1.06827e-68	0.897175	0.912	0.358	2.07245e-64	E30	ARPC5
3.02326e-68	0.364704	0.117	0.004	5.86513e-64	E30	RSAD2
3.7404e-68	0.523678	0.36	0.059	7.25638e-64	E30	TOP2A
3.87243e-68	0.542058	0.876	0.26	7.51251e-64	E30	VCP
5.8571e-68	0.401048	0.834	0.23	1.13628e-63	E30	RPN1
5.90201e-68	0.309148	0.855	0.233	1.14499e-63	E30	TRAM1
1.64214e-67	-2.09745	0.855	0.847	3.18574e-63	E30	DIAPH2.1
2.53758e-67	0.279609	0.488	0.098	4.92291e-63	E30	TBPL1
3.19812e-67	0.335328	0.261	0.032	6.20435e-63	E30	CCL24
5.75576e-67	0.590603	0.572	0.137	1.11662e-62	E30	TMEM150C
5.94938e-67	0.264829	0.71	0.179	1.15418e-62	E30	CCNC
6.41857e-67	0.511857	0.862	0.261	1.2452e-62	E30	REXO2
7.80325e-67	-1.29075	0.979	0.957	1.51383e-62	E30	SBF2
8.59462e-67	0.662894	0.89	0.286	1.66736e-62	E30	PRKAR1A
1.23839e-66	0.31885	0.76	0.2	2.40248e-62	E30	CERS2
2.63123e-66	0.532879	0.781	0.217	5.10458e-62	E30	CD68
2.73438e-66	0.880759	0.919	0.345	5.30469e-62	E30	CD99
3.5199e-66	0.52367	0.869	0.259	6.82861e-62	E30	DNASE2
6.2004e-66	0.712828	0.898	0.304	1.20288e-61	E30	HNRNPK
8.53345e-66	0.494078	0.89	0.264	1.65549e-61	E30	VPS26A
1.05535e-65	0.270651	0.481	0.099	2.04738e-61	E30	SLC7A1
1.12102e-65	0.473296	0.742	0.199	2.17477e-61	E30	GADD45A
1.40927e-65	0.37956	0.813	0.229	2.73398e-61	E30	RENBP
2.59325e-65	1.1467	0.883	0.345	5.03091e-61	E30	ALDOA
5.5867e-65	0.488493	0.887	0.266	1.08382e-60	E30	ITGB2
1.11785e-64	0.252358	0.615	0.147	2.16862e-60	E30	HNRNPA3
1.33818e-64	0.530927	0.459	0.096	2.59606e-60	E30	CD24
1.62984e-64	0.328597	0.777	0.21	3.16189e-60	E30	SLC20A1
2.98475e-64	0.725754	0.908	0.325	5.79041e-60	E30	ARF1
4.01159e-64	-2.2311	0.887	0.823	7.78249e-60	E30	VMP1
8.73618e-64	0.286512	0.283	0.039	1.69482e-59	E30	FANCI
1.05996e-63	-1.25358	0.961	0.93	2.05633e-59	E30	EXOC6B
1.22056e-63	0.309429	0.59	0.142	2.36788e-59	E30	CHKA
1.90628e-63	-2.03551	0.936	0.862	3.69819e-59	E30	MBNL1
1.91948e-63	0.347146	0.767	0.211	3.7238e-59	E30	VASP
1.96027e-63	0.328634	0.551	0.129	3.80292e-59	E30	INSIG1
3.5829e-63	0.728553	0.894	0.316	6.95082e-59	E30	PDIA6
4.40726e-63	0.498507	0.869	0.263	8.55008e-59	E30	RAB32
6.05559e-63	0.403295	0.714	0.2	1.17478e-58	E30	GCLC
6.28759e-63	0.277151	0.226	0.025	1.21979e-58	E30	GADD45G
4.45823e-62	1.09189	0.562	0.155	8.64896e-58	E30	CSTB
4.83612e-62	0.658564	0.876	0.31	9.38207e-58	E30	CD36
5.23313e-62	0.756741	0.806	0.264	1.01523e-57	E30	CD53
7.68865e-62	0.430592	0.735	0.202	1.4916e-57	E30	ARSB
8.41012e-62	0.947563	0.399	0.08	1.63156e-57	E30	CPNE8
9.01859e-62	0.256839	0.505	0.111	1.74961e-57	E30	TRERF1
3.62317e-61	0.401833	0.799	0.241	7.02894e-57	E30	PLEK
3.63454e-61	0.33212	0.459	0.097	7.05101e-57	E30	KLHL15
7.4088e-61	0.735938	0.943	0.365	1.43731e-56	E30	EEF2
2.46038e-60	1.23214	0.827	0.303	4.77314e-56	E30	LDHA
5.2978e-60	-1.4709	0.965	0.925	1.02777e-55	E30	ZSWIM6
8.60574e-60	0.260634	0.346	0.061	1.66951e-55	E30	CLEC3B
1.95201e-59	0.889856	0.77	0.277	3.7869e-55	E30	LYVE1
2.06735e-59	0.383847	0.88	0.266	4.01066e-55	E30	GDI2
2.60826e-59	0.255634	0.777	0.216	5.06002e-55	E30	TAF1D
2.65734e-59	0.679334	0.869	0.291	5.15523e-55	E30	BTG1
7.4541e-59	0.301305	0.859	0.253	1.44609e-54	E30	SARNP
7.70973e-59	1.02562	0.83	0.304	1.49569e-54	E30	TSPO
9.49127e-59	0.32894	0.806	0.238	1.84131e-54	E30	CRYL1
1.37174e-58	0.809233	0.912	0.398	2.66117e-54	E30	SNX3
1.83954e-58	0.837999	0.972	0.624	3.56871e-54	E30	ARPC2
7.28577e-58	0.341277	0.859	0.256	1.41344e-53	E30	PPP2CA
8.99544e-58	0.267467	0.816	0.236	1.74512e-53	E30	SMC3
1.06634e-57	0.434947	0.551	0.139	2.0687e-53	E30	MCC
1.50581e-57	0.250314	0.735	0.204	2.92128e-53	E30	CAT
2.21333e-57	0.365342	0.608	0.159	4.29387e-53	E30	PLAU
1.58762e-56	-1.5781	0.919	0.882	3.07999e-52	E30	PTPRJ
1.70086e-56	0.627241	0.901	0.308	3.29967e-52	E30	ATF4
2.98561e-56	0.391181	0.399	0.082	5.79208e-52	E30	ARRDC4
3.08339e-56	0.382173	0.717	0.208	5.98178e-52	E30	TARS1
5.66808e-56	-3.25546	0.456	0.701	1.09961e-51	E30	SSH2
6.82282e-56	1.91495	0.866	0.436	1.32363e-51	E30	FABP5
7.69515e-56	0.343109	0.823	0.25	1.49286e-51	E30	DNAJB6
9.11632e-56	0.252475	0.509	0.121	1.76857e-51	E30	INPP5F
9.26031e-56	1.0375	0.954	0.548	1.7965e-51	E30	ANXA2
1.18626e-55	-1.56088	0.996	0.934	2.30135e-51	E30	PICALM
1.50013e-55	0.583609	0.88	0.317	2.91025e-51	E30	CD81
1.61893e-55	1.52621	0.975	0.528	3.14072e-51	E30	SRGN
2.13168e-55	0.788751	0.915	0.381	4.13545e-51	E30	ITM2B
2.25444e-55	1.73226	0.304	0.056	4.37361e-51	E30	MMP12
2.37646e-55	0.844351	0.936	0.43	4.61034e-51	E30	PTGES3
1.58043e-54	0.439495	0.855	0.278	3.06603e-50	E30	ATP6V0E1
1.97539e-54	0.708029	0.943	0.376	3.83226e-50	E30	ZFP36L2
4.77576e-54	0.311885	0.88	0.273	9.26497e-50	E30	VAPA
6.27978e-54	0.94753	0.562	0.161	1.21828e-49	E30	ERO1A
6.71083e-54	0.306237	0.12	0.007	1.3019e-49	E30	ENSBTAG00000016603
6.90287e-54	0.328355	0.823	0.254	1.33916e-49	E30	ACBD3
1.54541e-53	0.340073	0.781	0.237	2.99809e-49	E30	UBE2B
1.56899e-53	-3.12315	0.77	0.789	3.04384e-49	E30	CD163
1.75139e-53	0.617337	0.491	0.128	3.39769e-49	E30	TIMD4
2.37255e-53	-4.07455	0.018	0.516	4.60275e-49	E30	PID1
3.14125e-53	0.333586	0.82	0.255	6.09403e-49	E30	NAA20
4.01901e-53	0.792311	0.958	0.501	7.79688e-49	E30	YWHAE
5.55276e-53	0.654175	0.88	0.319	1.07724e-48	E30	EIF3E
6.21706e-53	0.255289	0.693	0.198	1.20611e-48	E30	TMEM41B
1.34785e-52	-2.6782	0.65	0.756	2.61483e-48	E30	ABCA1
5.29145e-52	1.17851	0.894	0.384	1.02654e-47	E30	PLIN2
5.40108e-52	0.285177	0.442	0.101	1.04781e-47	E30	SLC16A3
1.3443e-51	0.323848	0.806	0.251	2.60794e-47	E30	LPCAT3
1.40751e-51	0.936146	0.929	0.419	2.73056e-47	E30	PKM
3.22824e-51	0.610805	0.883	0.339	6.26278e-47	E30	CAP1
4.30429e-51	-2.41319	0.721	0.762	8.35032e-47	E30	TNS3
1.89176e-50	0.855018	0.965	0.564	3.67001e-46	E30	CTSS
1.92594e-50	0.461521	0.35	0.073	3.73633e-46	E30	CHST8
3.22419e-50	1.36045	0.852	0.482	6.25492e-46	E30	C1QA
3.60748e-50	0.783865	0.929	0.482	6.99851e-46	E30	RHOA
4.24545e-50	0.478925	0.855	0.297	8.23617e-46	E30	PTP4A2
5.52302e-50	0.413317	0.866	0.297	1.07147e-45	E30	RPN2
7.03579e-50	0.574916	0.88	0.343	1.36494e-45	E30	TPM4
7.51158e-50	0.335575	0.269	0.045	1.45725e-45	E30	ZBTB7C
7.89717e-50	0.388026	0.89	0.295	1.53205e-45	E30	PTBP1
8.44651e-50	-1.84778	0.908	0.826	1.63862e-45	E30	FBXL17
2.81865e-49	0.506467	0.883	0.318	5.46819e-45	E30	CD86
4.35669e-49	0.295455	0.827	0.263	8.45198e-45	E30	SEC11A
9.27947e-49	0.324934	0.357	0.077	1.80022e-44	E30	CENPE
4.30504e-48	0.725801	0.905	0.425	8.35177e-44	E30	CTSK
8.48306e-48	0.372241	0.852	0.284	1.64571e-43	E30	SMARCA5
1.16882e-47	0.436099	0.866	0.305	2.26751e-43	E30	SSR1
2.80545e-47	0.302013	0.678	0.208	5.44257e-43	E30	MYLIP
3.95393e-47	0.386031	0.862	0.295	7.67062e-43	E30	EIF3A
6.03194e-47	-1.33767	0.965	0.923	1.1702e-42	E30	MAML2
6.1536e-47	-2.85691	0.534	0.69	1.1938e-42	E30	XDH
8.70199e-47	0.376182	0.873	0.304	1.68819e-42	E30	MMP14
1.10082e-46	-1.77477	0.834	0.797	2.1356e-42	E30	SRGAP1
1.24959e-46	0.318783	0.873	0.291	2.4242e-42	E30	BRD2
1.34058e-46	-1.74015	0.912	0.85	2.60073e-42	E30	RGL1
2.37949e-46	0.696352	0.813	0.32	4.6162e-42	E30	PGK1
2.73647e-46	1.113	0.94	0.514	5.30875e-42	E30	PEPD
5.43388e-46	0.356318	0.272	0.05	1.05417e-41	E30	LPL
6.81146e-46	0.665384	0.919	0.4	1.32142e-41	E30	MARCKS
7.79882e-46	0.354041	0.594	0.177	1.51297e-41	E30	SLC22A23
2.07654e-45	0.65704	0.926	0.395	4.0285e-41	E30	EIF5
2.18102e-45	0.359148	0.866	0.3	4.23118e-41	E30	SPCS2
2.25691e-45	-2.54103	0.502	0.673	4.3784e-41	E30	PIK3C2A
2.3911e-45	0.420195	0.781	0.266	4.63874e-41	E30	IER3
3.03073e-45	0.659645	0.961	0.496	5.87962e-41	E30	RAC1
3.06251e-45	0.391867	0.859	0.299	5.94127e-41	E30	MCL1
4.08464e-45	-2.69379	0.728	0.742	7.92421e-41	E30	ATP13A3
7.40795e-45	0.509931	0.947	0.375	1.43714e-40	E30	PCBP2
1.11319e-44	-1.77078	0.848	0.772	2.15959e-40	E30	VTI1A
1.74871e-44	-1.43934	0.862	0.81	3.39249e-40	E30	TBC1D5
2.26179e-44	0.637425	0.943	0.437	4.38788e-40	E30	PDIA3
8.27668e-44	0.359393	0.809	0.278	1.60568e-39	E30	CHD4
8.54159e-44	0.487947	0.792	0.288	1.65707e-39	E30	ARAF
9.99547e-44	-1.83825	0.936	0.885	1.93912e-39	E30	ZEB2
1.02847e-43	-1.85365	0.873	0.803	1.99524e-39	E30	WDFY3
1.3902e-43	0.280934	0.283	0.055	2.69699e-39	E30	COL4A1
3.70726e-43	0.321749	0.869	0.31	7.19208e-39	E30	MSN
5.43897e-43	0.372474	0.88	0.32	1.05516e-38	E30	ATP6V0B
1.17413e-42	-1.81291	0.823	0.769	2.27782e-38	E30	ETV6
1.49749e-42	0.287844	0.883	0.307	2.90513e-38	E30	EIF3H
2.06837e-42	-1.36585	0.947	0.922	4.01264e-38	E30	VAV3
2.25858e-42	0.609822	0.951	0.438	4.38164e-38	E30	HNRNPF
4.74405e-42	0.329539	0.852	0.305	9.20346e-38	E30	FERMT3
3.70894e-41	0.610225	0.982	0.62	7.19535e-37	E30	PABPC1
4.04713e-41	-1.38128	0.929	0.857	7.85143e-37	E30	AFF1
5.23888e-41	-1.23593	0.919	0.87	1.01634e-36	E30	LPP
5.27669e-41	0.44606	0.915	0.356	1.02368e-36	E30	LAPTM4A
6.24695e-41	0.354268	0.41	0.11	1.21191e-36	E30	OLR1
6.52608e-41	0.336054	0.901	0.324	1.26606e-36	E30	SFT2D1
6.74442e-41	-2.16988	0.477	0.653	1.30842e-36	E30	NBEA
9.0934e-41	-2.45643	0.208	0.549	1.76412e-36	E30	CTTNBP2
9.46744e-41	-2.60438	0.24	0.56	1.83668e-36	E30	SASH1
3.69296e-40	0.258016	0.859	0.302	7.16433e-36	E30	TFG
3.76642e-40	-1.68715	0.753	0.767	7.30686e-36	E30	SMYD3
3.94681e-40	-1.82983	0.894	0.83	7.6568e-36	E30	FRMD4B
1.34797e-39	0.284557	0.449	0.126	2.61506e-35	E30	STON2
2.78634e-39	-1.32099	0.919	0.797	5.40549e-35	E30	KMT2C
3.48452e-39	0.293626	0.311	0.071	6.75998e-35	E30	SGMS2
4.24346e-39	1.00445	0.735	0.303	8.23232e-35	E30	CCL3
4.32868e-39	-1.05767	0.965	0.869	8.39764e-35	E30	MED13L
5.9891e-39	0.323575	0.88	0.334	1.16188e-34	E30	DTNBP1
7.79676e-39	-1.15853	0.901	0.878	1.51257e-34	E30	ENSBTAG00000053119
8.18104e-39	0.381624	0.42	0.118	1.58712e-34	E30	TMEM37
1.01771e-38	0.689488	0.975	0.593	1.97436e-34	E30	CTSD
1.06875e-38	-1.08279	0.972	0.824	2.07338e-34	E30	HNRNPH1
2.47636e-38	-1.83974	0.742	0.716	4.80413e-34	E30	PTPN12
5.65762e-38	-3.7426	0	0.396	1.09758e-33	E30	PTX3
6.75562e-38	-1.44289	0.898	0.773	1.31059e-33	E30	SKAP2
2.8537e-37	0.592883	0.968	0.514	5.53618e-33	E30	HNRNPDL
3.65517e-37	-1.57425	0.943	0.797	7.09102e-33	E30	LRCH1
6.47119e-37	0.46914	0.862	0.355	1.25541e-32	E30	ATP6V0D1
8.27457e-37	-1.21234	0.965	0.872	1.60527e-32	E30	MEF2A
9.12631e-37	0.444688	0.208	0.037	1.7705e-32	E30	MMP9
1.49941e-36	-1.65911	0.806	0.751	2.90885e-32	E30	KIF13B
3.84918e-36	-2.83143	0.042	0.42	7.46742e-32	E30	ENSBTAG00000052736
4.53881e-36	-1.18728	0.951	0.867	8.80529e-32	E30	PPP3CA
4.92619e-36	0.30774	0.424	0.12	9.5568e-32	E30	SCLT1
5.9383e-36	0.596047	0.809	0.333	1.15203e-31	E30	EEPD1
7.21532e-36	0.422362	0.83	0.332	1.39977e-31	E30	ENSBTAG00000004043
7.79375e-36	-1.31998	0.901	0.792	1.51199e-31	E30	ZNF609
8.69611e-36	0.587189	0.947	0.471	1.68705e-31	E30	EIF4G2
1.10911e-35	0.316691	0.926	0.387	2.15166e-31	E30	CCDC50
1.24204e-35	0.584311	0.947	0.542	2.40956e-31	E30	TMBIM6
1.80554e-35	0.284944	0.788	0.288	3.50275e-31	E30	SEC24D
1.93268e-35	0.553309	0.933	0.464	3.74939e-31	E30	AMDHD2
3.14917e-35	0.383904	0.933	0.384	6.10939e-31	E30	SRSF2
3.63793e-35	-0.302546	0.604	0.186	7.05758e-31	E30	HMOX2
6.47296e-35	0.29917	0.837	0.327	1.25575e-30	E30	TMBIM4
7.41793e-35	-1.15069	0.958	0.843	1.43908e-30	E30	RNF130
9.58041e-35	-1.16397	0.936	0.797	1.8586e-30	E30	ASH1L
1.00979e-34	0.274679	0.873	0.338	1.959e-30	E30	DUSP6
2.32989e-34	-2.52591	0.071	0.427	4.51998e-30	E30	CERS6
2.95291e-34	-2.5852	0.187	0.506	5.72865e-30	E30	CHST11
4.21836e-34	0.602661	0.954	0.522	8.18363e-30	E30	HSP90B1
7.63679e-34	-1.14086	0.961	0.891	1.48154e-29	E30	FMNL2
1.0693e-33	-0.9587	0.982	0.904	2.07444e-29	E30	MACF1
1.78241e-33	0.444148	0.237	0.05	3.45787e-29	E30	PIK3R3
2.00799e-33	-2.83406	0.007	0.366	3.89549e-29	E30	MEGF10
2.09189e-33	-1.97761	0.915	0.786	4.05827e-29	E30	LYN
2.54277e-33	-3.62978	0.064	0.413	4.93298e-29	E30	IL1R2
2.56554e-33	0.396002	0.601	0.214	4.97715e-29	E30	LRIF1
3.2805e-33	0.322933	0.922	0.371	6.36417e-29	E30	EIF4A2
6.87427e-33	-1.30337	0.883	0.78	1.33361e-28	E30	EIF4G3
1.26704e-32	-2.27758	0.35	0.595	2.45806e-28	E30	SAMSN1
1.99782e-32	0.383033	0.926	0.399	3.87577e-28	E30	HNRNPM
2.2553e-32	0.25787	0.89	0.35	4.37528e-28	E30	SRSF7
2.29994e-32	-2.20806	0.516	0.643	4.46188e-28	E30	EXT1
2.32883e-32	-1.07606	0.958	0.838	4.51794e-28	E30	ANKRD12
2.89171e-32	-2.09692	0.834	0.748	5.60992e-28	E30	NRP1
3.63465e-32	0.255	0.894	0.357	7.05123e-28	E30	CDV3
4.03022e-32	-2.22334	0.23	0.507	7.81862e-28	E30	SH3PXD2B
4.18504e-32	-1.26095	0.887	0.765	8.11898e-28	E30	KANSL1
4.7762e-32	-0.250874	0.466	0.139	9.26582e-28	E30	HNMT
5.00633e-32	0.386183	0.901	0.387	9.71228e-28	E30	CYSTM1
8.52987e-32	-0.252902	0.541	0.171	1.65479e-27	E30	NPL
1.43324e-31	-2.02157	0.477	0.608	2.78049e-27	E30	HIP1
1.44576e-31	-0.268047	0.629	0.205	2.80477e-27	E30	DYNC1LI2
3.3207e-31	-1.90008	0.604	0.658	6.44216e-27	E30	ATXN1
6.04658e-31	-2.02078	0.643	0.672	1.17304e-26	E30	TBC1D1
1.06471e-30	-1.61142	0.845	0.743	2.06554e-26	E30	AAK1
1.41735e-30	-1.32638	0.837	0.742	2.74965e-26	E30	CHD9
2.023e-30	-2.13197	0.696	0.677	3.92462e-26	E30	ENPP2
2.25912e-30	0.305013	0.813	0.324	4.3827e-26	E30	CBFB
4.52987e-30	-1.3197	0.898	0.728	8.78795e-26	E30	ZNF638
4.77651e-30	-1.85953	0.647	0.678	9.26643e-26	E30	APP
7.35499e-30	0.417451	0.919	0.407	1.42687e-25	E30	PRPF40A
9.30832e-30	-0.259894	0.604	0.199	1.80581e-25	E30	GOSR1
1.15962e-29	-0.912778	0.943	0.848	2.24967e-25	E30	GNAQ
1.1991e-29	-2.35603	0.41	0.571	2.32626e-25	E30	PIK3R5
1.48025e-29	-2.07301	0.562	0.629	2.87169e-25	E30	TSPAN18
1.56505e-29	0.629914	0.954	0.554	3.03619e-25	E30	LGMN
1.64559e-29	-1.38168	0.809	0.722	3.19245e-25	E30	COP1
1.82666e-29	-0.301759	0.537	0.173	3.54373e-25	E30	BLVRA
1.91355e-29	-1.19292	0.908	0.802	3.71229e-25	E30	ELMO1
2.53227e-29	-1.00431	0.954	0.794	4.91261e-25	E30	NIPBL
2.90909e-29	-0.257249	0.509	0.162	5.64363e-25	E30	IL17RA
3.41893e-29	1.18557	0.576	0.298	6.63273e-25	E30	F13A1
9.99546e-29	0.285169	0.671	0.266	1.93912e-24	E30	CDK14
2.86995e-28	-2.48827	0.286	0.517	5.56771e-24	E30	DNAJC6
2.93749e-28	-1.92455	0.343	0.572	5.69874e-24	E30	THRB
7.76892e-28	-1.38663	0.834	0.727	1.50717e-23	E30	TBL1XR1
8.8235e-28	-0.250772	0.633	0.216	1.71176e-23	E30	USP7
9.25336e-28	-0.260138	0.463	0.147	1.79515e-23	E30	ZGPAT
9.8721e-28	-0.277902	0.594	0.201	1.91519e-23	E30	CCAR2
1.31826e-27	-0.251367	0.473	0.152	2.55742e-23	E30	PRPF3
1.55245e-27	-1.05652	0.968	0.868	3.01176e-23	E30	CELF2
1.67414e-27	0.322893	0.788	0.322	3.24783e-23	E30	EIF2AK3
3.61265e-27	-2.30446	0.325	0.517	7.00855e-23	E30	STK17B
4.08309e-27	-0.265929	0.459	0.147	7.92119e-23	E30	HPS1
4.55391e-27	-1.02903	0.965	0.879	8.83458e-23	E30	OPHN1
4.61663e-27	-0.290789	0.375	0.111	8.95627e-23	E30	GTF2H2
4.93162e-27	-3.00506	0	0.304	9.56734e-23	E30	CR2
5.42885e-27	-1.82927	0.636	0.645	1.0532e-22	E30	SUSD6
5.78782e-27	-1.01651	0.979	0.854	1.12284e-22	E30	DOCK4
6.29474e-27	-0.286614	0.463	0.149	1.22118e-22	E30	TPMT
6.82149e-27	-0.304306	0.527	0.176	1.32337e-22	E30	MRPS28
7.01919e-27	-2.08567	0.124	0.412	1.36172e-22	E30	ARAP2
1.06378e-26	-1.99856	0.417	0.568	2.06373e-22	E30	SLC49A4
1.64019e-26	-0.292447	0.562	0.191	3.18196e-22	E30	PPP6R1
1.92447e-26	0.331252	0.887	0.429	3.73347e-22	E30	ACP5
2.0992e-26	-1.04575	0.905	0.794	4.07245e-22	E30	EXOC4
2.54187e-26	0.313716	0.184	0.039	4.93122e-22	E30	ENSBTAG00000013919
2.55607e-26	-2.35293	0.141	0.417	4.95878e-22	E30	CFAP126
2.68893e-26	0.302439	0.491	0.184	5.21653e-22	E30	KIAA1217
5.48561e-26	-1.51155	0.813	0.7	1.06421e-21	E30	FOXP1
6.01374e-26	-0.295789	0.601	0.21	1.16666e-21	E30	LRRC25
7.46743e-26	-0.303518	0.558	0.191	1.44868e-21	E30	PTDSS1
8.31942e-26	-1.08733	0.901	0.791	1.61397e-21	E30	SIK3
1.07794e-25	-0.337334	0.516	0.174	2.0912e-21	E30	GSR
1.08305e-25	-2.13571	0.166	0.43	2.10112e-21	E30	BANK1
1.11944e-25	-1.96542	0.099	0.383	2.17171e-21	E30	SIRPB1
1.36435e-25	-0.294702	0.587	0.204	2.64684e-21	E30	NUDCD3
1.84619e-25	-0.283168	0.601	0.21	3.58162e-21	E30	RCHY1
2.40791e-25	-0.304435	0.572	0.199	4.67135e-21	E30	MPRIP
2.53183e-25	-0.945712	0.958	0.798	4.91176e-21	E30	AKAP13
3.54832e-25	0.584297	0.703	0.317	6.88375e-21	E30	ASRGL1
4.37567e-25	-1.90443	0.042	0.33	8.4888e-21	E30	NAIP
4.51905e-25	-0.259132	0.488	0.164	8.76696e-21	E30	AGPAT3
4.53181e-25	-0.288448	0.537	0.184	8.79171e-21	E30	PDXDC1
5.07318e-25	-1.54609	0.883	0.73	9.84197e-21	E30	NIBAN1
6.67157e-25	-0.288916	0.442	0.145	1.29428e-20	E30	IP6K2
7.09088e-25	-0.253478	0.572	0.202	1.37563e-20	E30	BCL2L13
1.05288e-24	0.307032	0.11	0.016	2.04259e-20	E30	NOS1AP
1.18539e-24	-0.316013	0.562	0.198	2.29966e-20	E30	ABTB1
1.31245e-24	-0.311935	0.392	0.124	2.54614e-20	E30	ERAP2
1.42223e-24	-1.43187	0.749	0.675	2.75912e-20	E30	FAF1
1.45239e-24	-0.306029	0.534	0.186	2.81765e-20	E30	EEF2K
1.7408e-24	-1.49632	0.912	0.761	3.37715e-20	E30	HIF1A
2.00816e-24	-1.8046	0.201	0.452	3.89583e-20	E30	KCNK13
2.05849e-24	-0.890596	0.94	0.808	3.99347e-20	E30	ARID1B
2.39755e-24	-0.277633	0.562	0.198	4.65125e-20	E30	RNF4
3.71223e-24	0.442876	0.905	0.475	7.20172e-20	E30	METRNL
3.98471e-24	-0.316726	0.456	0.153	7.73033e-20	E30	UBLCP1
5.12359e-24	-0.303815	0.544	0.191	9.93976e-20	E30	RFC1
6.53596e-24	-0.258271	0.396	0.128	1.26798e-19	E30	ENSBTAG00000050925
6.59891e-24	-0.261661	0.42	0.139	1.28019e-19	E30	RGL2
9.37035e-24	-1.12202	0.94	0.759	1.81785e-19	E30	DIP2B
1.36026e-23	-0.273453	0.576	0.206	2.63889e-19	E30	XPO4
1.55888e-23	-0.251345	0.385	0.125	3.02423e-19	E30	NAXD
1.66918e-23	-0.264786	0.565	0.205	3.23821e-19	E30	TTC7A
1.7501e-23	-0.254355	0.417	0.139	3.39518e-19	E30	DHX40
1.93001e-23	-0.264107	0.488	0.17	3.74423e-19	E30	MAP3K7
2.03058e-23	-0.260838	0.555	0.198	3.93933e-19	E30	ZC3H11A
2.66318e-23	-0.270148	0.71	0.264	5.16657e-19	E30	UBL3
2.72039e-23	-2.63908	0.396	0.549	5.27755e-19	E30	IL1RAP
3.53461e-23	-1.79926	0.678	0.635	6.85714e-19	E30	LRRC8D
3.77793e-23	-0.315633	0.615	0.225	7.32918e-19	E30	METTL9
4.27607e-23	-0.290519	0.615	0.224	8.29558e-19	E30	QRICH1
4.59288e-23	-0.28589	0.707	0.263	8.91019e-19	E30	PPT1
4.64204e-23	0.311891	0.908	0.41	9.00556e-19	E30	NPTN
6.02341e-23	-0.254158	0.371	0.12	1.16854e-18	E30	ACAD8
6.21786e-23	-1.76581	0.007	0.274	1.20626e-18	E30	LPAR3
6.36642e-23	2.06929	0.523	0.263	1.23509e-18	E30	MT2A
7.43716e-23	-0.285346	0.445	0.153	1.44281e-18	E30	SRFBP1
8.90401e-23	-0.304735	0.516	0.183	1.72738e-18	E30	MOB2
1.06548e-22	-1.41666	0.943	0.774	2.06704e-18	E30	RAP1B
1.07324e-22	-0.671281	0.445	0.153	2.08209e-18	E30	DCN
1.11237e-22	-1.59615	0.717	0.69	2.15799e-18	E30	DOCK10
1.52532e-22	0.410902	0.989	0.724	2.95912e-18	E30	SAT1
1.54316e-22	-1.64155	0.654	0.63	2.99374e-18	E30	SLC23A2
2.10052e-22	-0.268974	0.629	0.234	4.07501e-18	E30	BAZ2A
2.50467e-22	-0.29145	0.505	0.18	4.85905e-18	E30	SCYL2
3.03355e-22	-1.4859	0.654	0.648	5.88509e-18	E30	PHF21A
3.36671e-22	-0.303823	0.587	0.219	6.53141e-18	E30	ITGB5
3.41999e-22	-0.330578	0.534	0.192	6.63478e-18	E30	TDG
4.11872e-22	-0.293403	0.558	0.205	7.99032e-18	E30	ESF1
4.98867e-22	-0.301604	0.509	0.185	9.67802e-18	E30	HAVCR2
5.06034e-22	-0.250392	0.35	0.113	9.81707e-18	E30	GLMN
6.28e-22	-0.279627	0.456	0.16	1.21832e-17	E30	KDM5C
7.44569e-22	-0.282385	0.477	0.174	1.44446e-17	E30	PVR
8.29098e-22	0.372316	0.933	0.613	1.60845e-17	E30	LAPTM5
8.45416e-22	-0.257358	0.615	0.231	1.64011e-17	E30	ZCCHC8
8.77346e-22	0.810783	0.862	0.582	1.70205e-17	E30	ENSBTAG00000048980
9.48422e-22	-1.25425	0.919	0.734	1.83994e-17	E30	RBMS1
1.09251e-21	-0.268791	0.551	0.202	2.11947e-17	E30	CCNL2
1.10787e-21	-0.275828	0.633	0.237	2.14926e-17	E30	RAB21.1
1.23156e-21	-0.257564	0.657	0.249	2.38923e-17	E30	KATNBL1
1.2506e-21	-3.29428	0.473	0.561	2.42616e-17	E30	ALCAM
1.28459e-21	-0.251899	0.654	0.249	2.49211e-17	E30	USP10
1.49447e-21	-0.294816	0.541	0.198	2.89926e-17	E30	CREG1
1.50332e-21	-1.93926	0.131	0.374	2.91645e-17	E30	ABCA6
1.51752e-21	-0.269893	0.353	0.115	2.94398e-17	E30	PYROXD1
1.64316e-21	-0.292403	0.647	0.244	3.18773e-17	E30	HBP1
1.99093e-21	-0.295057	0.477	0.17	3.86241e-17	E30	DRAM1
2.05358e-21	-1.57624	0.057	0.311	3.98395e-17	E30	HTR7
2.06029e-21	-0.296375	0.512	0.187	3.99697e-17	E30	FBXW8
2.73232e-21	-1.46324	0.784	0.691	5.30069e-17	E30	UBE2E2
3.43116e-21	-0.258435	0.456	0.163	6.65645e-17	E30	NOL10
3.60245e-21	-1.50964	0.795	0.696	6.98876e-17	E30	RAPGEF2
3.91853e-21	0.842282	0.806	0.38	7.60194e-17	E30	LGALS3
4.17448e-21	-0.25784	0.367	0.123	8.09849e-17	E30	PEX7
5.52945e-21	-0.338776	0.905	0.366	1.07271e-16	E30	S100G
5.75546e-21	-1.29988	0.827	0.702	1.11656e-16	E30	SPRED1
6.5298e-21	-1.72097	0.565	0.614	1.26678e-16	E30	STXBP6
6.66714e-21	-0.254808	0.47	0.171	1.29342e-16	E30	AGPAT5
7.48626e-21	-0.25942	0.343	0.113	1.45233e-16	E30	CDC16
7.8625e-21	-1.48688	0.827	0.682	1.52532e-16	E30	WIPF1
8.50312e-21	-0.973692	0.922	0.753	1.6496e-16	E30	ANKRD17
1.10124e-20	0.497395	0.777	0.426	2.13641e-16	E30	C1QC
1.12742e-20	-0.305477	0.587	0.22	2.18719e-16	E30	STX12
1.31748e-20	-0.328316	0.445	0.159	2.55592e-16	E30	IKBKE
1.3531e-20	-0.294527	0.488	0.179	2.62501e-16	E30	DRAM2
1.46909e-20	-0.277025	0.459	0.167	2.85003e-16	E30	DNAJB14
1.64041e-20	-0.283912	0.484	0.177	3.18239e-16	E30	SPATS2
1.67437e-20	-0.27769	0.481	0.179	3.24828e-16	E30	MXD1
1.88076e-20	-0.252021	0.657	0.256	3.64867e-16	E30	ACOX1
2.30361e-20	-0.36035	0.636	0.241	4.469e-16	E30	GNL3L
2.37569e-20	-0.326234	0.742	0.285	4.60884e-16	E30	MAEA
2.39478e-20	-0.337268	0.537	0.2	4.64587e-16	E30	SPIN1
2.71115e-20	-1.33169	0.802	0.682	5.25963e-16	E30	KDM4C
2.74892e-20	-1.28197	0.774	0.689	5.33291e-16	E30	NOTCH2
4.2393e-20	-1.18516	0.852	0.742	8.22424e-16	E30	SLC4A7
4.40268e-20	-0.308053	0.459	0.168	8.5412e-16	E30	SH3BP5
4.98136e-20	-0.308019	0.435	0.157	9.66384e-16	E30	XPC
5.9005e-20	-0.35896	0.58	0.223	1.1447e-15	E30	LAMC1
6.03693e-20	-0.253859	0.41	0.146	1.17116e-15	E30	INSIG2
6.47156e-20	-0.354952	0.565	0.214	1.25548e-15	E30	SLC12A7
6.63136e-20	-1.20972	0.876	0.691	1.28648e-15	E30	PIAS1
7.53833e-20	-0.310018	0.42	0.151	1.46244e-15	E30	GNPAT
7.85423e-20	-0.323983	0.452	0.165	1.52372e-15	E30	TNIP2
1.06926e-19	-0.299619	0.555	0.211	2.07437e-15	E30	AGGF1
1.10193e-19	-1.80847	0.647	0.621	2.13775e-15	E30	SAMD4A
1.14494e-19	-0.352763	0.678	0.261	2.22118e-15	E30	CRK
1.17082e-19	-0.255531	0.534	0.206	2.2714e-15	E30	ABCD3
1.24735e-19	-1.62863	0.657	0.615	2.41985e-15	E30	PPM1H
1.26681e-19	-0.270298	0.378	0.133	2.45762e-15	E30	UTP18
1.37767e-19	-0.283162	0.728	0.288	2.67267e-15	E30	RNASEH2B
1.94406e-19	-0.255023	0.403	0.145	3.77148e-15	E30	CLCN3
2.01459e-19	-0.96607	0.933	0.767	3.90831e-15	E30	FNDC3B
2.02101e-19	-0.370893	0.636	0.246	3.92076e-15	E30	AATF
2.08117e-19	-1.1567	0.848	0.695	4.03746e-15	E30	ITFG1
2.13186e-19	-0.342901	0.668	0.261	4.1358e-15	E30	ATF1
2.15875e-19	0.286005	0.929	0.481	4.18797e-15	E30	HNRNPD
2.96328e-19	0.315945	0.943	0.524	5.74876e-15	E30	SEPTIN7
2.97812e-19	-0.309001	0.739	0.288	5.77755e-15	E30	USP4
3.15604e-19	-0.268549	0.36	0.126	6.12273e-15	E30	ARL5A
3.52283e-19	-1.55937	0.633	0.607	6.83428e-15	E30	ATG7
3.58918e-19	-1.41083	0.7	0.684	6.96301e-15	E30	NFIA
4.67301e-19	-0.303714	0.424	0.16	9.06563e-15	E30	PLEKHA5
4.77651e-19	-0.445895	0.534	0.203	9.26642e-15	E30	PABPC4
5.49705e-19	-0.324202	0.678	0.266	1.06643e-14	E30	HBS1L
5.71256e-19	0.315423	0.943	0.565	1.10824e-14	E30	LAMP1
5.72329e-19	-1.68327	0.025	0.255	1.11032e-14	E30	GPR39
6.67456e-19	-0.280475	0.505	0.194	1.29486e-14	E30	KCTD3
6.7381e-19	-0.375613	0.682	0.268	1.30719e-14	E30	DERA
8.38038e-19	-0.365709	0.201	0.057	1.62579e-14	E30	TIMP3
9.64204e-19	-1.3465	0.894	0.697	1.87056e-14	E30	CD47
1.06195e-18	-0.328873	0.417	0.152	2.06019e-14	E30	DENND10
1.27067e-18	-0.310354	0.541	0.21	2.46511e-14	E30	MARCHF5
1.43351e-18	-1.09911	0.926	0.745	2.78101e-14	E30	EPS15
1.69395e-18	-1.38092	0.915	0.72	3.28625e-14	E30	LHFPL2
1.82838e-18	-0.290521	0.678	0.269	3.54706e-14	E30	ENSBTAG00000048402
1.86405e-18	-0.274183	0.314	0.107	3.61626e-14	E30	VPS33A
1.93455e-18	-0.349711	0.435	0.161	3.75302e-14	E30	STRADA
1.98499e-18	-0.254997	0.367	0.132	3.85088e-14	E30	EDC3
2.03425e-18	-0.793978	0.943	0.798	3.94645e-14	E30	ENSBTAG00000054797
2.19638e-18	-0.301519	0.59	0.233	4.26097e-14	E30	TNPO3
2.20006e-18	-0.359724	0.654	0.259	4.26811e-14	E30	IVNS1ABP
2.65429e-18	-0.316828	0.406	0.15	5.14933e-14	E30	N4BP2L1
2.74535e-18	-0.323099	0.668	0.27	5.32598e-14	E30	TULP4
2.752e-18	-0.302618	0.413	0.152	5.33888e-14	E30	PLEKHF2
2.8905e-18	-0.301584	0.364	0.129	5.60757e-14	E30	COG2
3.17286e-18	-0.27642	0.343	0.12	6.15536e-14	E30	ORC2
3.34128e-18	-0.352768	0.562	0.223	6.48209e-14	E30	STK26
4.35594e-18	-0.289035	0.431	0.161	8.45052e-14	E30	HS6ST1
4.46579e-18	-0.548704	0.336	0.119	8.66363e-14	E30	RETN
4.50562e-18	-0.268016	0.36	0.129	8.7409e-14	E30	NELFA
5.01458e-18	-0.275634	0.735	0.296	9.72828e-14	E30	CREBZF
5.22961e-18	-1.50202	0.452	0.54	1.01454e-13	E30	LRBA
5.33313e-18	-0.26219	0.35	0.124	1.03463e-13	E30	NHLRC2
[truncated: 16,310 more rows]

## Sheet: Cow_HBC_stage_markers_KEGG
Cow_HBC_stage_markers_KEGG（avg_log2FC>=0.05）
Cluster	ID	Description	GeneRatio	BgRatio	pvalue	p.adjust	qvalue	geneID	Count
E105	bta04015	Rap1 signaling pathway	18/233	216/10540	1.33997e-06	0.000372511	0.00028774	616742/407217/506201/536654/282879/407124/783484/540106/525931/504531/281985/282001/282325/533270/789597/523745/535132/528252	18
E105	bta04928	Parathyroid hormone synthesis, secretion and action	12/233	115/10540	8.48093e-06	0.00099008	0.000764772	281637/281638/534129/407217/536654/534450/407231/512254/281985/514554/282001/282325	12
E105	bta04010	MAPK signaling pathway	20/233	300/10540	1.06843e-05	0.00099008	0.000764772	281637/281638/616742/407217/282879/100295732/523962/505369/508367/508943/512254/541127/533729/540106/525931/282001/282325/523745/504408/535376	20
E105	bta04360	Axon guidance	14/233	181/10540	4.74734e-05	0.0032994	0.00254857	503575/616742/530401/541127/539369/533729/504531/100337091/518168/282001/534164/539452/519843/538233	14
E105	bta01521	EGFR tyrosine kinase inhibitor resistance	9/233	82/10540	7.78345e-05	0.00338491	0.00261463	407217/540085/282879/540106/525931/504531/100337091/282001/282325	9
E105	bta04919	Thyroid hormone signaling pathway	11/233	122/10540	7.89995e-05	0.00338491	0.00261463	407238/407215/538979/508162/504531/281985/100337091/282001/282325/534649/788329	11
E105	bta04062	Chemokine signaling pathway	14/233	191/10540	8.52317e-05	0.00338491	0.00261463	281637/281638/100124525/510083/509821/536654/282136/533729/504531/530001/281985/100337091/527410/282325	14
E105	bta04014	Ras signaling pathway	16/233	247/10540	0.000116893	0.00356964	0.00275732	616742/407217/540085/282879/533729/540106/525931/504531/503625/100337091/514554/282001/282325/507082/523745/522344	16
E105	bta04961	Endocrine and other factor-regulated calcium reabsorption	7/233	51/10540	0.000119196	0.00356964	0.00275732	508794/407238/536654/281985/282001/282325/337925	7
E105	bta04144	Endocytosis	16/233	249/10540	0.000128404	0.00356964	0.00275732	522241/281637/281638/509221/317659/508794/407217/535998/282136/617416/514554/531459/532685/535376/540304/513789	16
E105	bta04072	Phospholipase D signaling pathway	12/233	154/10540	0.000154208	0.00389727	0.00301038	508794/407217/540085/540106/525931/504531/530001/281985/100337091/514554/617707/282001	12
E105	bta00562	Inositol phosphate metabolism	8/233	73/10540	0.000197167	0.00456771	0.00352825	535487/507329/132342102/504531/530001/281985/100337091/282087	8
E105	bta04662	B cell receptor signaling pathway	9/233	94/10540	0.000224601	0.004803	0.00371	510393/515377/507329/530401/541127/504531/100337091/282325/523745	9
E105	bta04070	Phosphatidylinositol signaling system	9/233	98/10540	0.000307858	0.00611319	0.00472204	535487/507329/132342102/504531/281985/100337091/282001/282325/282087	9
E105	bta04929	GnRH secretion	7/233	65/10540	0.000551573	0.0102225	0.00789621	281637/281638/536654/504531/281985/282001/282325	7
E105	bta04921	Oxytocin signaling pathway	11/233	156/10540	0.000678929	0.0117964	0.00911194	407217/536654/100295732/512254/530401/541127/530001/281985/504219/282001/282325	11
E105	bta04020	Calcium signaling pathway	15/233	264/10540	0.000767513	0.0125511	0.0096949	782045/407217/536654/282879/530401/541127/540106/525931/100336808/281985/100337091/282001/282325/337925/510830	15
E105	bta04540	Gap junction	8/233	92/10540	0.000953406	0.0142288	0.0109908	407217/536654/100295732/540106/525931/281985/282001/282325	8
E105	bta04725	Cholinergic synapse	9/233	115/10540	0.000995089	0.0142288	0.0109908	534129/536654/784876/613605/504531/530001/281985/282001/282325	9
E105	bta04912	GnRH signaling pathway	8/233	93/10540	0.00102365	0.0142288	0.0109908	407217/536654/523962/508943/281985/514554/282001/282325	8
E105	bta05223	Non-small cell lung cancer	7/233	74/10540	0.00120547	0.0159581	0.0123266	407217/692183/282879/504531/100337091/282001/282325	7
E105	bta04666	Fc gamma R-mediated phagocytosis	8/233	98/10540	0.00143956	0.0181908	0.0140512	507329/533729/504531/100337091/514554/617707/282001/282325	8
E105	bta04611	Platelet activation	9/233	123/10540	0.0015995	0.0189897	0.0146683	503575/536654/408007/504531/530001/281985/100337091/509326/528252	9
E105	bta05231	Choline metabolism in cancer	8/233	100/10540	0.0016394	0.0189897	0.0146683	407217/540106/525931/504531/514554/617707/282001/282325	8
E105	bta04510	Focal adhesion	12/233	204/10540	0.00190873	0.0206556	0.0159551	407217/282879/535043/532127/533729/616294/540106/525931/504531/282001/282325/528252	12
E105	bta05205	Proteoglycans in cancer	12/233	205/10540	0.00198864	0.0206556	0.0159551	511203/503575/407217/407238/540085/282879/533729/506724/504531/100337091/282001/282325	12
E105	bta04810	Regulation of actin cytoskeleton	13/233	233/10540	0.00200612	0.0206556	0.0159551	503575/525628/407217/782315/535043/532127/407124/513641/533729/540106/525931/504531/538233	13
E105	bta05166	Human T-cell leukemia virus 1 infection	13/233	238/10540	0.00241732	0.0240005	0.0185388	526824/504869/534129/407215/523962/508367/508943/530401/541127/539369/504531/535376/528252	13
E105	bta04012	ErbB signaling pathway	7/233	86/10540	0.0028797	0.0276054	0.0213234	407217/540085/533729/504531/100337091/282001/282325	7
E105	bta04064	NF-kappa B signaling pathway	8/233	114/10540	0.00372721	0.0345389	0.026679	526824/510393/515377/616179/508367/100337091/282325/530884	8
E105	bta04148	Efferocytosis	10/233	169/10540	0.00428871	0.03846	0.0297078	100124525/359716/509821/768047/100336680/530401/541127/408007/282303/505361	10
E105	bta04022	cGMP-PKG signaling pathway	10/233	172/10540	0.00485318	0.042162	0.0325674	534129/536654/534669/407231/512254/530401/541127/530001/281985/337925	10
E105	bta04935	Growth hormone synthesis, secretion and action	8/233	120/10540	0.00508571	0.0428433	0.0330936	534129/536654/523962/504531/281985/100337091/282001/282325	8
E105	bta05225	Hepatocellular carcinoma	10/233	176/10540	0.00569494	0.0460366	0.0355603	407217/540085/282879/534450/504531/100337091/282001/282325/540904/535376	10
E105	bta05211	Renal cell carcinoma	6/233	74/10540	0.00579597	0.0460366	0.0355603	535219/540085/282879/533729/540106/504531	6
E105	bta04310	Wnt signaling pathway	10/233	179/10540	0.006398	0.0487118	0.0376267	534450/530401/541127/281985/282001/282325/785924/515972/508893/535441	10
E105	bta04722	Neurotrophin signaling pathway	8/233	125/10540	0.00648322	0.0487118	0.0376267	540085/100295732/523962/508943/504531/100337091/504408/614726	8
E188	bta04144	Endocytosis	15/135	249/10540	6.43187e-07	0.000148576	0.000135408	522241/512010/509221/317659/535998/516048/281801/281848/617416/514554/531459/532685/541230/540304/513789	15
E240	bta04144	Endocytosis	12/103	249/10540	5.2791e-06	0.00119308	0.00103359	522241/515216/281080/509221/317659/508794/535998/508431/531459/509769/540304/513789	12
E240	bta04961	Endocrine and other factor-regulated calcium reabsorption	5/103	51/10540	0.000132908	0.0150186	0.013011	515216/281080/508794/281985/282323	5
E240	bta04148	Efferocytosis	8/103	169/10540	0.000241473	0.018191	0.0157593	534961/509968/509821/768047/534492/504429/505543/507549	8
E240	bta04142	Lysosome	7/103	141/10540	0.00044924	0.0253821	0.0219891	517002/506192/510620/281080/327711/534524/281421	7
E280	bta05417	Lipid and atherosclerosis	31/311	242/10540	4.11053e-12	1.15506e-09	7.74511e-10	535379/530610/282170/281048/281052/286849/281214/613667/280828/282488/281212/281249/281251/525246/534996/537380/281345/507859/497024/616115/282291/538639/282031/327708/281496/508541/540203/539513/281534/521961/282123	31
E280	bta04062	Chemokine signaling pathway	26/311	191/10540	6.14096e-11	5.81211e-09	3.89724e-09	282170/414347/511671/281214/613667/281735/280828/281203/618399/535298/281212/280814/525246/534996/533199/281345/616115/282291/614838/541008/282031/327708/537682/510814/508541/521961	26
E280	bta05167	Kaposi sarcoma-associated herpesvirus infection	28/311	221/10540	6.2051e-11	5.81211e-09	3.89724e-09	508571/280677/511754/281214/613667/280828/282488/281203/618399/281212/280814/281814/282257/282258/537201/525246/534996/533199/616115/282291/614838/539640/510814/508541/515515/540481/512484/282127	28
E280	bta04380	Osteoclast differentiation	22/311	152/10540	5.84348e-10	4.10505e-08	2.75259e-08	509889/535298/282257/282258/281250/281251/282642/537201/533199/407219/281345/507859/616115/526392/282291/327666/529990/510814/515515/540203/282382/512484	22
E280	bta05134	Legionellosis	14/311	58/10540	8.91825e-10	5.01206e-08	3.36077e-08	280677/281048/281214/613667/280828/281212/281249/281251/539780/616115/526392/282291/512480/281534	14
E280	bta04668	TNF signaling pathway	20/311	134/10540	2.08736e-09	9.7758e-08	6.55504e-08	517541/531942/514386/497199/281214/613667/281735/282488/281212/281248/281251/783681/533199/537380/535622/616115/282291/540203/508105/338033	20
E280	bta04620	Toll-like receptor signaling pathway	19/311	123/10540	2.95494e-09	1.1862e-07	7.95389e-08	282170/414347/281048/286849/407131/280828/282257/282258/281251/537201/533199/535622/616115/282291/510814/540203/281534/493686/512484	19
E280	bta04010	MAPK signaling pathway	30/311	300/10540	4.24132e-09	1.48976e-07	9.98943e-08	540421/327667/281048/618644/282488/281165/503620/535298/281250/281251/539334/408017/533199/537380/535622/509109/280877/616115/526392/507204/282031/327708/100139484/533491/511190/519269/537682/540203/534620/282382	30
E280	bta04064	NF-kappa B signaling pathway	18/311	114/10540	5.42939e-09	1.69518e-07	1.13668e-07	282151/514386/414347/281048/286849/497199/281214/613667/280828/281212/281251/534996/616115/526392/282291/515515/540203/508105	18
E280	bta04621	NOD-like receptor signaling pathway	23/311	206/10540	3.87411e-08	1.08862e-06	7.29964e-07	510080/514386/338039/281105/281214/613667/280828/281212/282257/282258/281249/281251/537201/539780/616115/282291/512480/538639/510814/540203/539513/508105/512484	23
E280	bta04060	Cytokine-cytokine receptor interaction	30/311	340/10540	7.48796e-08	1.91283e-06	1.28263e-06	282170/414347/286849/281096/511671/281214/613667/281735/280828/282488/281212/282257/282258/767864/407110/281248/525040/281249/281250/281251/515700/539334/281860/404154/521554/768210/282382/338033/789154/574056	30
E280	bta04657	IL-17 signaling pathway	15/311	102/10540	2.74416e-07	6.42592e-06	4.30882e-06	281096/281214/613667/281735/280828/281212/525040/281251/616115/282291/616818/532569/540203/508105/616801	15
E280	bta05323	Rheumatoid arthritis	15/311	104/10540	3.55851e-07	7.69186e-06	5.15768e-06	282148/282170/407131/281214/613667/281735/280828/503620/281212/281248/281249/281250/281251/513684/281534	15
E280	bta05140	Leishmaniasis	13/311	79/10540	4.58403e-07	9.20081e-06	6.16949e-06	280677/281250/281251/537201/525246/281345/507859/616115/282291/282876/510814/540203/281534	13
E280	bta05162	Measles	18/311	162/10540	1.29962e-06	2.43463e-05	1.63251e-05	525906/511754/282488/282257/282258/281250/281251/537201/616115/282291/281489/510814/508541/540203/281534/493686/508105/512484	18
E280	bta04640	Hematopoietic cell lineage	14/311	110/10540	4.05126e-06	7.11503e-05	4.7709e-05	281048/281052/327677/281057/518609/407126/281096/281250/281251/515700/404154/521554/281873/282642	14
E280	bta05221	Acute myeloid leukemia	11/311	69/10540	4.90056e-06	8.10034e-05	5.43158e-05	540421/282151/281048/535298/533199/616115/281402/529631/537682/508541/540481	11
E280	bta04659	Th17 cell differentiation	14/311	114/10540	6.19967e-06	9.67838e-05	6.48972e-05	280714/281814/281251/539334/404154/537201/525246/616115/282291/529631/510814/508541/282382/512484	14
E280	bta05161	Hepatitis B	18/311	183/10540	7.47382e-06	0.000110534	7.41171e-05	540421/280828/282488/535298/282257/537201/525246/533199/616115/282291/541008/537682/510814/508541/540203/282382/281534/512484	18
E280	bta05145	Toxoplasmosis	14/311	117/10540	8.42126e-06	0.000118319	7.93371e-05	514386/286849/767864/537201/525246/616115/282291/282876/614838/510814/508541/540203/281534/512484	14
E280	bta05205	Proteoglycans in cancer	19/311	205/10540	9.90986e-06	0.00012722	8.53059e-05	540421/281057/280760/282488/281165/535298/281814/281873/281875/282642/280847/533199/281983/519269/508133/537682/508541/281534/521961	19
E280	bta04148	Efferocytosis	17/311	169/10540	9.96029e-06	0.00012722	8.53059e-05	535379/517541/521784/518752/281052/282661/618644/281814/281875/282642/525246/533894/533199/539136/515854/327666/529990	17
E280	bta05169	Epstein-Barr virus infection	20/311	236/10540	2.18225e-05	0.000266614	0.000178775	286849/281057/511754/407126/282488/282257/282258/537201/534996/616115/526392/282291/535683/510814/508541/515515/540203/281534/508105/512484	20
E280	bta04066	HIF-1 signaling pathway	13/311	114/10540	2.97975e-05	0.000348879	0.000233937	534075/503620/281814/788926/408017/281274/533199/616115/282876/407183/507476/281375/508541	13
E280	bta04151	PI3K-Akt signaling pathway	27/311	392/10540	3.638e-05	0.000408912	0.000274191	511754/281096/529235/503620/281203/618399/535298/786335/282257/282258/404154/521554/408017/281873/281875/282642/537201/525246/532829/533199/616115/100138311/614838/515854/537682/515515/281534	27
E280	bta05152	Tuberculosis	18/311	210/10540	4.85317e-05	0.000524515	0.000351707	282148/280677/281048/767864/281249/281250/281251/515034/537201/525246/100138565/616115/282876/510814/515515/513684/281534/533656	18
E280	bta04625	C-type lectin receptor signaling pathway	12/311	106/10540	6.47486e-05	0.000654672	0.000438982	531942/525906/616646/281251/100138565/616115/526392/282291/538639/519269/510814/515515	12
E280	bta04936	Alcoholic liver disease	15/311	158/10540	6.52342e-05	0.000654672	0.000438982	280677/493645/281048/281214/613667/280828/282488/281212/525040/281251/537380/616115/282291/540203/540481	15
E280	bta05164	Influenza A	17/311	198/10540	7.6967e-05	0.000737567	0.000494566	511754/280828/282488/282257/282258/281249/281250/281251/537201/525246/533199/616115/282291/538639/510814/493686/512484	17
E280	bta04722	Neurotrophin signaling pathway	13/311	125/10540	7.87438e-05	0.000737567	0.000494566	535298/515034/510342/533199/537380/616115/282291/282705/282031/327708/511190/617840/537682	13
E280	bta04520	Adherens junction	11/311	93/10540	8.72914e-05	0.000791255	0.000530566	408017/534360/507204/508658/508150/282031/327708/513902/540481/282382/783645	11
E280	bta05133	Pertussis	10/311	78/10540	9.20291e-05	0.000808131	0.000541882	280677/281048/281735/280828/281250/281251/281873/616115/538639/282876	10
E280	bta05132	Salmonella infection	20/311	266/10540	0.000117938	0.00100426	0.000673392	282689/514386/338039/281048/280828/281165/281249/281251/533199/539780/616115/282291/512480/538639/537790/407152/538366/540203/540481/281534	20
E280	bta05163	Human cytomegalovirus infection	19/311	251/10540	0.000159673	0.00131965	0.000884874	282170/414347/511754/280828/282488/281203/618399/535298/767864/281251/281875/282642/537201/533199/616115/282291/541008/537682/508541	19
E280	bta05168	Herpes simplex virus 1 infection	17/311	211/10540	0.000167849	0.00134759	0.00090361	514386/280677/282488/282257/282258/281251/281873/282642/537201/525246/616115/282291/510814/515515/540203/281534/512484	17
E280	bta05146	Amoebiasis	12/311	119/10540	0.000198375	0.00153102	0.00102661	518752/281048/281214/613667/280828/281212/281251/515700/616115/282876/281534/783645	12
E280	bta04933	AGE-RAGE signaling pathway in diabetic complications	11/311	102/10540	0.000201593	0.00153102	0.00102661	280828/280686/281250/281251/525246/616115/281402/281375/510814/508541/282382	11
E280	bta05135	Yersinia infection	14/311	156/10540	0.000207264	0.00153266	0.00102771	280828/535347/281249/281251/281873/533199/616115/282291/512480/538639/541008/511190/540203/521961	14
E280	bta05142	Chagas disease	12/311	121/10540	0.000232168	0.0016728	0.00112168	280677/282170/497199/280828/282488/281251/616115/282291/282876/281375/282382/281534	12
E280	bta05144	Malaria	8/311	58/10540	0.000278539	0.00195674	0.00131206	281052/286849/281096/280828/281249/281251/533894/281534	8
E280	bta05211	Renal cell carcinoma	9/311	74/10540	0.00030925	0.00211438	0.00141777	540421/534075/540313/535298/281814/533199/282031/327708/537682	9
E280	bta05160	Hepatitis C	15/311	182/10540	0.000316029	0.00211438	0.00141777	540421/511754/497199/282488/535298/282257/282258/537201/533199/616115/282291/537682/510814/508541/512484	15
E280	bta04662	B cell receptor signaling pathway	10/311	94/10540	0.000436356	0.00285153	0.00191206	407126/535298/534996/533199/616115/282291/100138311/537682/515515/521961	10
E280	bta04061	Viral protein interaction with cytokine and cytokine receptor	10/311	95/10540	0.000475209	0.00296741	0.00198976	282170/414347/281214/613667/281735/280828/281212/767864/281249/338033	10
E280	bta05235	PD-L1 expression and PD-1 checkpoint pathway in cancer	10/311	95/10540	0.000475209	0.00296741	0.00198976	535008/281814/537201/525246/533199/616115/282291/510814/508541/281534	10
E280	bta05220	Chronic myeloid leukemia	9/311	79/10540	0.000506297	0.00309282	0.00207385	540421/511754/535298/533199/616115/282291/529631/537682/282382	9
E280	bta04068	FoxO signaling pathway	12/311	135/10540	0.000635541	0.00379972	0.00254786	540421/539020/535298/521554/408017/533199/507204/515854/281496/537682/508541/282382	12
E280	bta04630	JAK-STAT signaling pathway	16/311	218/10540	0.000731377	0.0042816	0.00287098	281096/535298/282257/282258/767864/407110/281248/404154/521554/537201/525246/281402/537682/510814/508541/512484	16
E280	bta05165	Human papillomavirus infection	22/311	354/10540	0.000796137	0.0045656	0.00306141	282148/511754/282684/282488/535298/282257/282258/281873/281875/282642/783681/537201/533199/616115/513730/512571/282705/537682/510814/540481/513684/512484	22
E280	bta05321	Inflammatory bowel disease	8/311	69/10540	0.000917944	0.00515885	0.0034592	281249/281250/281251/404154/616115/510814/508541/281534	8
E280	bta05202	Transcriptional misregulation in cancer	15/311	204/10540	0.00104431	0.00575393	0.00385823	781149/282151/539020/514386/281048/286849/280828/504512/503620/282261/515700/407219/616115/282713/529631	15
E280	bta05171	Coronavirus disease - COVID-19	20/311	317/10540	0.00113843	0.00615188	0.00412507	517541/280677/493645/514076/281096/280828/282257/282258/281251/537201/616115/282291/538639/510814/508541/515515/540203/281534/493686/512484	20
E280	bta04920	Adipocytokine signaling pathway	8/311	73/10540	0.00133302	0.00701792	0.00470578	536628/514159/281052/525246/616115/282291/508541/338033	8
E280	bta04217	Necroptosis	14/311	188/10540	0.00134864	0.00701792	0.00470578	514386/497199/282488/282257/282258/281250/281251/537201/525246/538639/510814/508541/508105/512484	14
E280	bta04610	Complement and coagulation cascades	9/311	93/10540	0.00165159	0.00843811	0.00565807	280677/493645/518609/514076/407126/512581/280686/281983/281375	9
E280	bta05212	Pancreatic cancer	8/311	77/10540	0.00188521	0.00945969	0.00634308	540421/511754/537201/533199/616115/510814/508541/282382	8
E280	bta04658	Th1 and Th2 cell differentiation	9/311	97/10540	0.00221507	0.0109199	0.00732222	404154/783681/537201/525246/616115/282291/513730/510814/512484	9
E280	bta04666	Fc gamma R-mediated phagocytosis	9/311	98/10540	0.00237745	0.0115183	0.00772347	535077/280814/534996/533199/281935/281345/407152/515515/521961	9
E280	bta04014	Ras signaling pathway	16/311	247/10540	0.00267956	0.012762	0.00855738	540313/503620/281203/618399/535298/538510/408017/100138565/533199/280877/616115/282031/327708/533491/519269/537682	16
E280	bta01521	EGFR tyrosine kinase inhibitor resistance	8/311	82/10540	0.00281316	0.013175	0.00883431	540421/535298/537201/525246/533199/280877/537682/508541	8
E280	bta04510	Focal adhesion	14/311	204/10540	0.00289113	0.0133182	0.00893033	514386/786490/281165/503620/535298/281873/281875/282642/533199/282031/327708/537682/521961/783645	14
E280	bta04910	Insulin signaling pathway	11/311	141/10540	0.00301512	0.0134773	0.00903701	540421/525906/535298/786335/788926/408017/533199/508658/100139988/617840/537682	11
E280	bta04216	Ferroptosis	6/311	49/10540	0.00302159	0.0134773	0.00903701	536628/514159/521189/515437/508193/504235	6
E280	bta04218	Cellular senescence	12/311	164/10540	0.00337268	0.0148082	0.00992943	511754/280828/540313/510158/282261/281250/533199/616115/519269/281375/282382/616801	12
E280	bta04145	Phagosome	12/311	166/10540	0.00372169	0.0160892	0.0107884	282148/280677/407129/281048/281052/281873/281875/282642/281345/507859/513684/281534	12
E280	bta04210	Apoptosis	11/311	149/10540	0.00459773	0.0195752	0.0131259	282151/514386/497199/281105/510524/404187/282488/533199/537380/616115/282291	11
E280	bta05224	Breast cancer	11/311	151/10540	0.00508166	0.0213126	0.0142909	540421/511754/282684/535298/783681/533199/525346/526392/513730/537682/540481	11
E280	bta04931	Insulin resistance	9/311	110/10540	0.00516358	0.0213378	0.0143078	281052/786335/408017/783217/616115/282291/508658/511190/508541	9
E280	bta04072	Phospholipase D signaling pathway	11/311	154/10540	0.00588227	0.0239553	0.016063	280828/513389/535298/408017/532829/533199/614838/541008/519269/537682/515515	11
E280	bta05203	Viral carcinogenesis	15/311	250/10540	0.00724784	0.0290949	0.0195092	282148/280677/511754/535298/535077/517559/537201/534996/616115/526392/282291/512571/533491/508541/515515	15
E280	bta00600	Sphingolipid metabolism	6/311	59/10540	0.00761976	0.0301571	0.0202215	615110/282407/616901/533538/537972/514357	6
E280	bta04650	Natural killer cell mediated cytotoxicity	11/311	160/10540	0.00777962	0.0303621	0.020359	540421/282488/535298/282257/282258/533199/541008/617344/537682/515515/521961	11
E280	bta04142	Lysosome	10/311	141/10540	0.00887344	0.0339573	0.0227696	282148/504799/518169/281105/510524/404187/282470/521189/513684/536469	10
E280	bta04330	Notch signaling pathway	6/311	61/10540	0.00894248	0.0339573	0.0227696	517541/616399/783681/513730/512187/282705	6
E280	bta04371	Apelin signaling pathway	10/311	143/10540	0.00975121	0.0365345	0.0244978	281203/618399/517559/783681/533199/282876/614838/519269/281375/282382	10
E280	bta04919	Thyroid hormone signaling pathway	9/311	122/10540	0.00999609	0.0369592	0.0247826	282144/281814/281875/282642/533199/525346/513730/539640/510814	9
E280	bta05208	Chemical carcinogenesis - reactive oxygen species	15/311	264/10540	0.0116347	0.042459	0.0284704	280714/540421/535298/281814/533199/537380/281345/497024/616115/282291/508658/508150/513953/281496/537682	15
E280	bta04917	Prolactin signaling pathway	7/311	85/10540	0.0126065	0.0454158	0.030453	535298/525246/533199/616115/537682/510814/508541	7
E280	bta04660	T cell receptor signaling pathway	9/311	128/10540	0.0134192	0.0474351	0.031807	525906/535298/533199/535622/616115/282291/407152/537682/521961	9
E280	bta04140	Autophagy - animal	11/311	173/10540	0.0135046	0.0474351	0.031807	508571/497199/281105/540873/529235/281814/533199/519269/539513/508631/537096	11
E280	bta05215	Prostate cancer	8/311	107/10540	0.0137055	0.0475462	0.0318815	540421/535298/515700/533199/616115/282291/537682/540481	8
E280	bta05418	Fluid shear stress and atherosclerosis	10/311	151/10540	0.0139396	0.0477685	0.0320306	281250/281251/515700/281875/282642/537380/281345/497024/616115/508133	10
E280	bta04979	Cholesterol metabolism	5/311	49/10540	0.0142903	0.0483803	0.0324408	535379/281052/533894/505640/281033	5
E30	bta05012	Parkinson disease	111/598	303/10540	2.17958e-62	6.56055e-60	5.46043e-60	509107/282578/327675/327668/338081/617230/338053/337887/540176/282701/282710/282690/281640/3283882/617095/100297344/520277/539277/3283879/3283880/3283883/281090/444878/287012/282199/100270792/614700/327688/540225/100300550/281091/512500/510767/3283889/281791/415113/3283877/3283878/3283884/3283886/3283885/3283887/3283888/327673/326346/338084/327698/327704/613541/327670/338063/327710/327702/327690/…	111
E30	bta05020	Prion disease	109/598	302/10540	1.90857e-60	2.8724e-58	2.39073e-58	509107/282578/327675/327668/338081/617230/338053/337887/540176/282701/282710/282690/281640/3283882/534961/617435/3283879/3283880/3283883/281090/444878/287012/282199/100270792/614700/327688/540225/100300550/281091/539235/281111/512500/510767/3283889/282254/415113/539835/281831/3283877/3283878/3283884/3283886/3283885/3283887/3283888/327673/326346/338084/327698/327704/613541/327670/338063/327710/327…	109
E30	bta05010	Alzheimer disease	107/598	423/10540	2.54673e-42	8.51738e-41	7.08913e-41	509107/282578/327675/327668/338081/617230/338053/337887/540176/282701/282710/282690/281640/3283882/510373/617095/100297344/520277/539277/3283879/3283880/3283883/281090/444878/287012/282199/100270792/614700/327688/540225/100300550/281091/539235/512500/510767/3283889/347700/493720/281181/3283877/3283878/3283884/3283886/3283885/3283887/3283888/327673/326346/338084/327698/327704/613541/327670/338063/…	107
E30	bta05014	Amyotrophic lateral sclerosis	106/598	408/10540	4.27959e-43	1.84022e-41	1.53164e-41	280979/404122/537706/509107/282578/327675/327668/338081/617230/338053/337887/540176/282701/282710/282690/281640/3283882/510373/3283879/3283880/3283883/281090/444878/287012/282199/100270792/614700/327688/540225/100300550/281091/512500/510767/3283889/281209/505093/415113/3283877/3283878/3283884/3283886/3283885/3283887/3283888/327673/326346/338084/327698/327704/613541/327670/338063/327710/327702/327…	106
E30	bta05016	Huntington disease	103/598	339/10540	8.06979e-49	4.85801e-47	4.04339e-47	536553/282578/327675/327668/338081/617230/338053/337887/540176/282701/282710/282690/281640/3283882/281078/3283879/3283880/3283883/281090/444878/287012/282199/100270792/614700/327688/540225/100300550/281091/512500/510767/3283889/281209/3283877/3283878/3283884/3283886/3283885/3283887/3283888/327673/326346/338084/327698/327704/613541/327670/338063/327710/327702/327690/327701/404161/327706/338061/338…	103
E30	bta03010	Ribosome	97/598	251/10540	7.88549e-57	7.91178e-55	6.58508e-55	282847/515990/399560/538054/506988/506358/508825/510058/101907103/506521/509469/511926/505981/510899/516004/523435/327682/286790/533310/512745/404133/508221/767925/539373/507151/514046/509163/404142/510615/326584/616065/614872/504876/507168/282048/337890/404137/404190/618702/507270/282688/513031/615556/505603/515534/506768/768327/508165/613592/768317/504413/615300/767908/510547/515238/511051/5149…	97
E30	bta05171	Coronavirus disease - COVID-19	93/598	317/10540	1.55517e-42	5.85133e-41	4.87014e-41	534961/617435/281043/347700/617881/282847/280795/281871/280831/280872/280873/347699/654488/286790/533310/512745/404133/508221/767925/539373/507151/514046/509163/404142/510615/326584/616065/614872/504876/507168/282048/337890/404137/404190/618702/507270/282688/513031/615556/505603/515534/506768/768327/508165/613592/768317/504413/615300/767908/510547/515238/511051/514966/513128/535056/282884/286868/…	93
E30	bta05415	Diabetic cardiomyopathy	85/598	233/10540	2.59277e-47	1.30071e-45	1.0826e-45	282578/327675/327668/338081/617230/338053/337887/540176/282701/282710/282690/281640/3283882/281052/282187/282188/510833/3283879/3283880/3283883/281090/444878/287012/282199/100270792/614700/327688/540225/100300550/281091/282883/281111/512500/3283889/281181/616718/3283877/3283878/3283884/3283886/3283885/3283887/3283888/327673/326346/338084/327698/327704/613541/327670/338063/327710/327702/327690/327…	85
E30	bta05208	Chemical carcinogenesis - reactive oxygen species	82/598	264/10540	1.60021e-39	4.81664e-38	4.00895e-38	618607/282578/327675/327668/338081/617230/338053/337887/540176/282701/282710/282690/281640/3283882/3283879/3283880/3283883/281090/444878/287012/282199/100270792/614700/327688/540225/100300550/281091/281111/512500/3283889/280795/505642/513221/280831/507346/3283877/3283878/3283884/3283886/3283885/3283887/3283888/327673/326346/338084/327698/327704/613541/327670/338063/327710/327702/327690/327701/404…	82
E30	bta00190	Oxidative phosphorylation	79/598	164/10540	3.9257e-55	2.95409e-53	2.45873e-53	282578/327675/327668/338081/617230/338053/337887/540176/338040/506492/515696/282701/282710/282690/281640/3283882/327687/287017/282405/281641/3283879/100295800/3283880/3283883/281090/444878/287012/282199/100270792/614700/327688/540225/100300550/281091/512500/510767/3283889/3283877/3283878/3283884/3283886/3283885/3283887/3283888/327673/326346/338084/327698/327704/613541/327670/338063/327710/327702/…	79
E30	bta04714	Thermogenesis	79/598	260/10540	2.69469e-37	7.37365e-36	6.13719e-36	280979/404122/282578/327675/327668/338081/617230/338053/337887/540176/338040/506492/515696/282701/282710/282690/281640/3283882/539832/3283879/768048/100295800/3283880/3283883/281090/444878/287012/282199/100270792/614700/327688/540225/100300550/281091/512500/3283889/3283877/3283878/3283884/3283886/3283885/3283887/3283888/327673/326346/338084/327698/327704/613541/327670/338063/327710/327702/327690/…	79
E30	bta04932	Non-alcoholic fatty liver disease	56/598	178/10540	1.98867e-27	4.98824e-26	4.15178e-26	509107/510373/3283879/3283880/3283883/281090/444878/287012/282199/100270792/614700/327688/540225/100300550/281091/512500/510767/3283889/280795/280831/327673/326346/338084/327698/327704/613541/327670/338063/327710/327702/327690/327701/404161/327706/338061/338065/282517/282289/338046/327697/338057/327691/338079/287027/287014/282290/281440/286840/281481/616109/281570/616871/282393/287020/613899/2868…	56
E30	bta04723	Retrograde endocannabinoid signaling	38/598	154/10540	4.9972e-15	1.0744e-13	8.94236e-14	281791/281202/613930/511812/287018/3283877/3283878/3283884/3283886/3283885/3283887/3283888/327673/326346/338084/327698/327704/613541/327670/338063/327710/327702/327690/327701/404161/327706/338061/338065/282517/282289/338046/327697/338057/327691/338079/287027/287014/282290	38
E30	bta04141	Protein processing in endoplasmic reticulum	36/598	176/10540	1.08068e-11	2.16855e-10	1.80492e-10	509107/533949/281036/614538/510682/528862/538426/506316/100125317/613357/613577/281832/767874/282646/282254/415113/539835/281831/507165/540389/768033/281373/281803/415110/613927/514688/518880/505941/506986/615778/506530/767980/504438/767958/506676/507345	36
E30	bta05132	Salmonella infection	36/598	266/10540	9.55071e-07	1.62984e-05	1.35654e-05	280979/404122/282689/338058/326600/540838/506596/539459/614345/540092/510767/404151/513342/493720/280795/281181/281832/767874/282646/280831/531505/513895/282846/613749/509970/281440/338049/538559/326588/282466/404053/539882/615087/100295973/539149/280950	36
E30	bta05170	Human immunodeficiency virus 1 infection	28/598	246/10540	0.000332125	0.00370258	0.0030817	768053/280729/510373/533050/515712/617095/100297344/520277/539277/281036/534553/510767/617277/540859/493720/280795/281791/281202/613930/511812/287018/407173/280831/281803/281440/327671/518880/540322	28
E30	bta05417	Lipid and atherosclerosis	27/598	242/10540	0.000578084	0.0062144	0.00517233	281631/509107/510373/617095/100297344/520277/539277/281043/282170/281052/281111/510767/100125317/280795/281832/767874/282646/282254/415113/539835/281831/511913/100125591/280831/282846/281440/338049	27
E30	bta05163	Human cytomegalovirus infection	27/598	251/10540	0.00101274	0.0101611	0.00845724	509107/280729/510373/533050/515712/617095/100297344/520277/539277/281036/281043/282170/407771/510618/510767/509613/493720/281791/281202/613930/511812/287018/407173/281803/281440/327671/338049	27
E30	bta05167	Kaposi sarcoma-associated herpesvirus infection	26/598	221/10540	0.000320631	0.00370258	0.0030817	510373/533050/515712/617095/100297344/520277/539277/407771/414345/510618/510767/347700/493720/280795/281202/613930/511812/287018/100125591/407173/280831/281440/286839/615199/281370/444874	26
E30	bta04144	Endocytosis	26/598	249/10540	0.00190949	0.0159654	0.0132883	536553/338058/510994/326600/540838/506596/539459/614345/533050/515712/523847/539781/281078/507672/282254/539835/281831/407173/532723/613749/509970/338049/528265/514423/618785/513840	26
E30	bta04260	Cardiac muscle contraction	25/598	105/10540	5.71093e-10	1.07437e-08	8.94211e-09	3283879/3283880/3283883/281090/444878/287012/282199/100270792/614700/327688/540225/100300550/281091/512500/3283889/497015/497019/535277/616109/281570/616871/282393/287020/613899/286885	25
E30	bta04145	Phagosome	25/598	166/10540	6.7621e-06	0.000107126	8.91624e-05	280979/404122/327687/287017/282405/281641/533050/515712/281036/281052/282196/515200/327711/281111/407173/613749/509970/281440/506986/615778/404053/539882/615087/100295973/539149	25
E30	bta05169	Epstein-Barr virus infection	25/598	236/10540	0.00189976	0.0159654	0.0132883	280729/510373/533050/515712/281036/510618/510767/347700/493720/618405/100125591/281871/407173/280831/347699/654488/281803/508448/282015/539784/512456/512891/281440/767981/280955	25
E30	bta03050	Proteasome	23/598	49/10540	2.09654e-16	4.85429e-15	4.04029e-15	510314/515503/539141/510423/510155/505050/514237/282328/516919/533874/506203/534640/510069/282013/510593/508448/282015/539784/512456/512891/510041/509857/767981	23
E30	bta05418	Fluid shear stress and atherosclerosis	23/598	151/10540	1.29994e-05	0.000186325	0.000155081	280979/404122/617095/100297344/520277/539277/281043/515200/281111/280795/505642/513221/281832/767874/282646/280831/507346/281440/327671/338049/338045/132342073/280950	23
E30	bta05017	Spinocerebellar ataxia	21/598	151/10540	0.000119276	0.00156096	0.00129921	510767/515503/539141/510423/510155/505050/514237/516919/533874/506203/534640/510069/508448/282015/539784/512456/512891/767981/282479/282480/282120	21
E30	bta04530	Tight junction	21/598	180/10540	0.00130491	0.0126702	0.0105456	280979/404122/524770/326600/540838/506596/539459/614345/510618/281574/280831/531505/281341/505242/515499/535321/514541/281440/338049/404053/539882	21
E30	bta01200	Carbon metabolism	20/598	117/10540	8.26886e-06	0.000124446	0.000103578	509566/281748/281141/281181/280808/327669/535182/281306/508683/404148/514939/507476/616120/512571/781227/286840/281481/509983/513453/281543	20
E30	bta04217	Necroptosis	20/598	188/10540	0.00494087	0.0389113	0.0323864	510373/523847/539781/347700/493720/281173/286861/618489/287016/613618/282691/281832/767874/286764/281418/282846/282479/282480/338045/282120	20
E30	bta04612	Antigen processing and presentation	18/598	85/10540	9.74656e-07	1.62984e-05	1.35654e-05	280729/533050/515712/281036/515200/327711/281832/767874/282254/415113/539835/281831/615930/407173/281281/281803/510041/509857	18
E30	bta04210	Apoptosis	18/598	149/10540	0.00190868	0.0159654	0.0132883	280979/404122/509107/510373/414925/282883/513038/515200/327711/510767/493720/280795/618405/280831/404144/286764/404053/539882	18
E30	bta04137	Mitophagy - animal	17/598	110/10540	0.000143514	0.0017999	0.00149808	509107/521378/539235/615565/327715/282531/280831/515363/613749/509970/286839/338045/781575/615199/281370/444874/507345	17
E30	bta04915	Estrogen signaling pathway	16/598	139/10540	0.00536721	0.0403883	0.0336157	509107/617095/100297344/520277/539277/282883/280795/281791/281832/767874/282646/282254/539835/281831/280831/514812	16
E30	bta05100	Bacterial invasion of epithelial cells	14/598	76/10540	8.03797e-05	0.00109974	0.000915329	280979/404122/326600/540838/506596/539459/614345/281078/280794/281440/338049/538559/535746/511612	14
E30	bta04066	HIF-1 signaling pathway	14/598	114/10540	0.00504167	0.0389113	0.0323864	509566/535578/509613/617277/540859/281141/281181/513221/281274/281275/508683/507476/518880/787914	14
E30	bta00010	Glycolysis / Gluconeogenesis	12/598	65/10540	0.000251639	0.00302973	0.00252169	618607/509566/281141/281181/280808/281274/281275/508683/404148/507476/512571/281543	12
E30	bta05133	Pertussis	12/598	78/10540	0.0013847	0.0128848	0.0107242	534961/617435/617095/100297344/520277/539277/534553/280795/281791/280831/282846/338049	12
E30	bta01230	Biosynthesis of amino acids	11/598	74/10540	0.00286187	0.0232817	0.0193776	509566/281141/281181/327669/508683/404148/507476/512571/781227/513453/281543	11
E30	bta05416	Viral myocarditis	11/598	83/10540	0.00698356	0.0496505	0.0413248	280979/404122/510373/533050/515712/414345/510767/286870/407173/281440/327671	11
E30	bta05134	Legionellosis	10/598	58/10540	0.00141261	0.0128848	0.0107242	338058/510767/282220/326581/282254/539835/281831/511913/282846/507345	10
E30	bta00030	Pentose phosphate pathway	7/598	29/10540	0.000952833	0.00988975	0.00823137	509566/280808/508683/514939/616120/781227/513453	7
E30	bta00020	Citrate cycle (TCA cycle)	6/598	31/10540	0.00709294	0.0496505	0.0413248	327669/535182/281306/286840/281481/509983	6
E30	bta03060	Protein export	6/598	31/10540	0.00709294	0.0496505	0.0413248	415113/504842/506986/615778/767917/512792	6
E50	bta03010	Ribosome	85/449	251/10540	8.23535e-55	2.39649e-52	1.95915e-52	282847/515990/510058/506521/523435/615431/327682/286790/533310/512745/404133/508221/767925/539373/507151/514046/509163/404142/510615/326584/616065/614872/504876/507168/282048/337890/404137/404190/618702/507270/282688/513031/615556/505603/515534/506768/768327/508165/613592/768317/504413/615300/767908/510547/515238/511051/514966/513128/535056/282884/286868/533285/286853/540965/539196/326582/535668/…	85
E50	bta05171	Coronavirus disease - COVID-19	90/449	317/10540	1.09639e-50	1.59525e-48	1.30413e-48	534961/617435/281043/505647/617881/282847/280795/507359/280831/616115/525408/286790/533310/512745/404133/508221/767925/539373/507151/514046/509163/404142/510615/326584/616065/614872/504876/507168/282048/337890/404137/404190/618702/507270/282688/513031/615556/505603/515534/506768/768327/508165/613592/768317/504413/615300/767908/510547/515238/511051/514966/513128/535056/282884/286868/533285/286853/…	90
E50	bta00190	Oxidative phosphorylation	55/449	164/10540	4.42441e-35	4.29168e-33	3.50848e-33	282578/327675/327668/338081/617230/338053/337887/540176/506492/515696/282701/282710/282690/281640/3283882/287017/282405/281641/613925/3283879/3283880/3283883/281090/444878/287012/282199/100270792/614700/327688/540225/281091/3283889/3283877/3283878/3283884/3283886/3283885/3283887/3283888/326346/338084/327698/327704/338063/327701/404161/338061/282517/338057/287027/281481/616109/281570/287020/613899	55
E50	bta05012	Parkinson disease	69/449	303/10540	5.35209e-32	3.89365e-30	3.18309e-30	509107/282578/327675/327668/338081/617230/338053/337887/540176/282701/282710/282690/281640/3283882/617095/100297344/520277/3283879/3283880/3283883/281090/444878/287012/282199/100270792/614700/327688/540225/281091/3283889/777788/539175/535820/415113/3283877/3283878/3283884/3283886/3283885/3283887/3283888/326346/338084/327698/327704/338063/327701/404161/338061/282517/338057/287027/505050/286839/281…	69
E50	bta05020	Prion disease	68/449	302/10540	3.28333e-31	1.9109e-29	1.56217e-29	509107/282578/327675/327668/338081/617230/338053/337887/540176/282701/282710/282690/281640/3283882/534961/617435/3283879/3283880/3283883/281090/444878/287012/282199/100270792/614700/327688/540225/281091/534129/3283889/777788/407125/535820/282254/415113/539835/281831/3283877/3283878/3283884/3283886/3283885/3283887/3283888/326346/338084/327698/327704/338063/327701/404161/338061/282517/338057/287027…	68
E50	bta05415	Diabetic cardiomyopathy	56/449	233/10540	2.75217e-27	1.3348e-25	1.09121e-25	282578/327675/327668/338081/617230/338053/337887/540176/282701/282710/282690/281640/3283882/3283879/3283880/3283883/281090/444878/287012/282199/100270792/614700/327688/540225/281091/3283889/3283877/3283878/3283884/3283886/3283885/3283887/3283888/326346/338084/327698/327704/338063/327701/404161/338061/282517/338057/287027/616115/286764/281481/282479/282480/534649/282089/535376/616109/281570/287020…	56
E50	bta05208	Chemical carcinogenesis - reactive oxygen species	59/449	264/10540	6.45168e-27	2.68206e-25	2.1926e-25	282578/327675/327668/338081/617230/338053/337887/540176/282701/282710/282690/281640/3283882/531682/3283879/3283880/3283883/281090/444878/287012/282199/100270792/614700/327688/540225/281091/3283889/280795/517724/513221/280831/507346/3283877/3283878/3283884/3283886/3283885/3283887/3283888/326346/338084/327698/327704/338063/327701/404161/338061/282517/338057/287027/616115/281481/282479/282480/281495…	59
E50	bta04714	Thermogenesis	57/449	260/10540	1.45509e-25	5.2929e-24	4.32699e-24	280979/404122/282578/327675/327668/338081/617230/338053/337887/540176/506492/515696/282701/282710/282690/281640/3283882/3283879/3283880/3283883/281090/444878/287012/282199/100270792/614700/327688/540225/281091/534129/3283889/505290/3283877/3283878/3283884/3283886/3283885/3283887/3283888/326346/338084/327698/327704/338063/327701/404161/338061/282517/338057/287027/504219/787914/281481/616109/281570…	57
E50	bta05014	Amyotrophic lateral sclerosis	71/449	408/10540	3.01598e-25	9.75166e-24	7.97206e-24	280979/404122/537706/509107/282578/327675/327668/338081/617230/338053/337887/540176/282701/282710/282690/281640/3283882/531682/3283879/3283880/3283883/281090/444878/287012/282199/100270792/614700/327688/540225/281091/3283889/777788/535820/280796/281209/281210/505093/415113/3283877/3283878/3283884/3283886/3283885/3283887/3283888/326346/338084/327698/327704/338063/327701/404161/338061/282517/338057…	71
E50	bta05016	Huntington disease	64/449	339/10540	8.52027e-25	2.4794e-23	2.02693e-23	536553/282578/327675/327668/338081/617230/338053/337887/540176/282701/282710/282690/281640/3283882/281078/281698/3283879/3283880/3283883/281090/444878/287012/282199/100270792/614700/327688/540225/281091/534129/3283889/281209/281210/3283877/3283878/3283884/3283886/3283885/3283887/3283888/326346/338084/327698/327704/338063/327701/404161/338061/282517/338057/287027/282312/526320/505050/281481/282479…	64
E50	bta05010	Alzheimer disease	68/449	423/10540	3.76431e-22	9.95832e-21	8.141e-21	509107/282578/327675/327668/338081/617230/338053/337887/540176/282701/282710/282690/281640/3283882/617095/100297344/520277/3283879/3283880/3283883/281090/444878/287012/282199/100270792/614700/327688/540225/281091/281094/539003/3283889/777788/504445/535820/280843/3283877/3283878/3283884/3283886/3283885/3283887/3283888/326346/338084/327698/327704/338063/327701/404161/338061/282517/338057/287027/616…	68
E50	bta04932	Non-alcoholic fatty liver disease	39/449	178/10540	9.72192e-18	2.35757e-16	1.92733e-16	509107/3283879/3283880/3283883/281090/444878/287012/282199/100270792/614700/327688/540225/281091/3283889/777788/535820/280795/507359/280831/326346/338084/327698/327704/338063/327701/404161/338061/282517/338057/287027/616115/504219/281481/282089/280943/616109/281570/287020/613899	39
E50	bta04141	Protein processing in endoplasmic reticulum	30/449	176/10540	5.88388e-11	1.31708e-09	1.07673e-09	509107/281036/281719/777788/510682/528862/538426/535820/514361/613357/613577/281832/767874/282646/282254/415113/539835/281831/507165/281373/281803/514688/540564/505941/506986/615778/615427/529312/506530/504438	30
E50	bta04260	Cardiac muscle contraction	19/449	105/10540	7.67432e-08	1.59516e-06	1.30406e-06	3283879/3283880/3283883/281090/444878/287012/282199/100270792/614700/327688/540225/281091/3283889/337925/497019/616109/281570/287020/613899	19
E50	bta05418	Fluid shear stress and atherosclerosis	23/449	151/10540	9.39325e-08	1.82229e-06	1.48974e-06	280979/404122/617095/100297344/520277/281043/539003/515200/539175/280795/517724/513221/281832/767874/282646/281839/280831/507346/616115/338045/132342073/280943/280950	23
E50	bta04723	Retrograde endocannabinoid signaling	22/449	154/10540	5.61462e-07	1.02116e-05	8.34806e-06	281202/511812/287018/505290/3283877/3283878/3283884/3283886/3283885/3283887/3283888/326346/338084/327698/327704/338063/327701/404161/338061/282517/338057/287027	22
E50	bta05132	Salmonella infection	27/449	266/10540	2.47602e-05	0.000423837	0.00034649	783375/280979/404122/531336/326600/506596/539003/404151/280795/281832/767874/282646/280831/531505/616115/513895/282846/509970/511776/326588/282466/615427/280943/404053/539882/539149/280950	27
E50	bta05417	Lipid and atherosclerosis	24/449	242/10540	0.000100605	0.00162645	0.00132964	509107/617095/100297344/520277/538409/281043/282170/777788/535820/280795/281832/767874/282646/282254/415113/539835/281831/511913/281839/280831/511224/616115/282846/280943	24
E50	bta05323	Rheumatoid arthritis	14/449	104/10540	0.000125264	0.00191852	0.00156841	287017/282405/281641/613925/281043/282170/414345/281094/515200/280795/281839/280831/282089/280943	14
E50	bta04210	Apoptosis	17/449	149/10540	0.000197716	0.00287677	0.00235178	280979/404122/509107/538409/515200/777788/535820/280795/505463/618405/280831/404144/616115/286764/280943/404053/539882	17
E50	bta05133	Pertussis	11/449	78/10540	0.000436897	0.00605415	0.00494931	534961/617435/617095/100297344/520277/534553/280795/280831/616115/282846/280943	11
E50	bta05134	Legionellosis	9/449	58/10540	0.000707521	0.00935858	0.00765071	282220/326581/282254/539835/281831/511913/616115/282846/280943	9
E50	bta04010	MAPK signaling pathway	25/449	300/10540	0.00103364	0.0130778	0.0106912	509107/281094/509418/777788/539175/616742/280795/505463/618405/282254/539835/281831/516099/281240/280831/517192/788091/511224/616115/528390/522670/616317/282089/535376/280943	25
E50	bta04657	IL-17 signaling pathway	12/449	102/10540	0.00128258	0.0155512	0.0127133	281043/286836/281743/280795/540819/281832/767874/282646/280831/517192/616115/280943	12
E50	bta04530	Tight junction	17/449	180/10540	0.00173489	0.0201942	0.0165089	280979/404122/524770/326600/506596/404153/414921/281574/280831/531505/281341/505242/509290/504219/514541/404053/539882	17
E50	bta04380	Osteoclast differentiation	15/449	152/10540	0.00206924	0.0231595	0.0189331	281094/509418/280795/540819/280831/514246/517192/511224/616115/522670/338045/282089/535376/280943/282390	15
E50	bta04915	Estrogen signaling pathway	14/449	139/10540	0.00238195	0.0250063	0.0204428	509107/617095/100297344/520277/534129/280795/281832/767874/282646/282254/539835/281831/280831/514812	14
E50	bta04137	Mitophagy - animal	12/449	110/10540	0.002459	0.0250063	0.0204428	509107/521378/535820/327715/282531/280831/509970/286839/338045/615199/281370/444874	12
E50	bta05031	Amphetamine addiction	9/449	69/10540	0.00249204	0.0250063	0.0204428	509107/617095/100297344/520277/534129/280795/540819/280831/613629	9
E50	bta05167	Kaposi sarcoma-associated herpesvirus infection	19/449	221/10540	0.00283573	0.0275066	0.0224868	617095/100297344/520277/414345/513497/539003/280795/281202/511812/287018/281839/280831/788091/511224/616115/286839/615199/281370/444874	19
E50	bta04612	Antigen processing and presentation	10/449	85/10540	0.00318421	0.0298905	0.0244357	281036/515200/281832/767874/282254/415113/539835/281831/281803/280943	10
E50	bta04213	Longevity regulating pathway - multiple species	8/449	61/10540	0.00412795	0.0375386	0.0306881	531682/281719/282254/539835/281831/504219/613629/281495	8
E50	bta04218	Cellular senescence	15/449	164/10540	0.00429385	0.0378639	0.0309541	617095/100297344/520277/513497/505463/618405/788091/511224/616115/613629/282479/282480/338045/282089/535376	15
E50	bta04216	Ferroptosis	7/449	49/10540	0.00442809	0.0378992	0.0309829	281173/286861/512468/286809/513221/515361/540653	7
E50	bta04966	Collecting duct acid secretion	5/449	27/10540	0.00509183	0.0423336	0.0346081	287017/282405/281641/613925/280740	5
E50	bta05142	Chagas disease	12/449	121/10540	0.00537932	0.0423336	0.0346081	534961/617435/281036/281043/282170/280795/280831/616115/509290/282089/535376/280943	12
E50	bta04625	C-type lectin receptor signaling pathway	11/449	106/10540	0.00538263	0.0423336	0.0346081	617095/100297344/520277/282226/280831/788091/511224/616115/282846/522670/280943	11
E50	bta00480	Glutathione metabolism	8/449	65/10540	0.00610461	0.0464935	0.0380088	512468/281209/281210/286809/517724/781648/507346/281365	8
E50	bta05140	Leishmaniasis	9/449	79/10540	0.00623109	0.0464935	0.0380088	282220/280795/280831/539555/616115/525408/512312/282089/280943	9
E58	bta04750	Inflammatory mediator regulation of TRP channels	10/211	110/10540	6.85457e-05	0.0189186	0.0152244	532713/510406/286883/534125/504531/281985/100337091/282001/282325/505901	10
E58	bta04360	Axon guidance	12/211	181/10540	0.000277653	0.0289036	0.0232596	532713/100337226/539369/533729/527964/504531/100337091/518168/282001/282041/512892/407103	12
E58	bta04012	ErbB signaling pathway	8/211	86/10540	0.000314169	0.0289036	0.0232596	532713/527418/534125/533729/504531/100337091/282001/282325	8
E58	bta04961	Endocrine and other factor-regulated calcium reabsorption	6/211	51/10540	0.000509318	0.0295407	0.0237722	282641/508794/281985/282001/282325/337925	6
E58	bta04912	GnRH signaling pathway	8/211	93/10540	0.000535157	0.0295407	0.0237722	532713/286883/523962/534125/281985/514554/282001/282325	8
E58	bta04070	Phosphatidylinositol signaling system	8/211	98/10540	0.000759429	0.0349337	0.0281122	535487/504531/281985/100337091/780855/282001/282325/282087	8
E58	bta01521	EGFR tyrosine kinase inhibitor resistance	7/211	82/10540	0.00124445	0.0490668	0.0394855	282879/507359/540106/504531/100337091/282001/282325	7
E58	bta03440	Homologous recombination	5/211	42/10540	0.00142769	0.0492552	0.0396371	353120/507069/783256/788127/617007	5
E84	bta05166	Human T-cell leukemia virus 1 infection	15/192	238/10540	2.89881e-05	0.00773982	0.00567557	504869/539241/506214/537027/524530/616369/510465/785291/407173/523962/530401/539369/282306/504531/535376	15
E84	bta04148	Efferocytosis	12/192	169/10540	5.93802e-05	0.00792725	0.00581301	282132/404074/317692/532713/100124525/537203/509821/504429/530401/408007/505543/507549	12
E84	bta04929	GnRH secretion	7/192	65/10540	0.000170079	0.0133696	0.00980386	517040/536654/281878/282306/504531/282325/407103	7
E84	bta04218	Cellular senescence	11/192	164/10540	0.000200294	0.0133696	0.00980386	504869/524530/616369/281878/407173/286883/530401/282306/504531/524870/535376	11
E84	bta04662	B cell receptor signaling pathway	8/192	94/10540	0.000306115	0.0163465	0.0119868	100299906/510393/515377/507329/530401/282306/504531/282325	8
E84	bta05223	Non-small cell lung cancer	7/192	74/10540	0.000383062	0.0170463	0.0124999	524530/616369/407217/692183/282306/504531/282325	7
E84	bta05214	Glioma	7/192	78/10540	0.000529011	0.0186419	0.01367	532713/524530/616369/407217/282306/504531/282325	7
E84	bta04921	Oxytocin signaling pathway	10/192	156/10540	0.000558558	0.0186419	0.01367	532713/524530/407217/536654/281878/512254/530401/504219/282325/508029	10
E84	bta04066	HIF-1 signaling pathway	8/192	114/10540	0.00111141	0.0329717	0.024178	532713/407217/508619/507359/525647/282306/504531/282325	8
E84	bta04912	GnRH signaling pathway	7/192	93/10540	0.00150911	0.0397028	0.0291138	532713/407217/536654/281878/286883/523962/282325	7
E84	bta04380	Osteoclast differentiation	9/192	152/10540	0.00183163	0.0397028	0.0291138	510393/509418/508619/281878/286883/530401/282306/504531/535376	9
E84	bta04070	Phosphatidylinositol signaling system	7/192	98/10540	0.00204235	0.0397028	0.0291138	507329/281878/132342102/282306/504531/282325/282087	7
E84	bta05203	Viral carcinogenesis	12/192	250/10540	0.00206826	0.0397028	0.0291138	524530/616369/511951/785291/511829/540666/535415/522155/407173/282306/504531/524870	12
E84	bta05163	Human cytomegalovirus infection	12/192	251/10540	0.00213816	0.0397028	0.0291138	524530/616369/407217/536654/507359/281878/407173/286883/530401/282306/504531/282325	12
E84	bta04961	Endocrine and other factor-regulated calcium reabsorption	5/192	51/10540	0.00226773	0.0397028	0.0291138	515216/282641/536654/282325/337925	5
E84	bta05167	Kaposi sarcoma-associated herpesvirus infection	11/192	221/10540	0.00237919	0.0397028	0.0291138	524530/100335828/414345/508619/522155/281878/407173/286883/530401/282306/504531	11
E84	bta05212	Pancreatic cancer	6/192	77/10540	0.00274254	0.043074	0.0315859	524530/616369/407217/282306/504531/535376	6
E84	bta04940	Type I diabetes mellitus	5/192	54/10540	0.0029219	0.0433416	0.0317821	539241/506214/414345/535346/407173	5

## Sheet: Cow_HBC_stage_markers_GO
Cow_HBC_stage_markers_GO（avg_log2FC>=0.05）
Cluster	ID	Description	GeneRatio	BgRatio	pvalue	p.adjust	qvalue	geneID	Count
E105	GO:0030036	actin cytoskeleton organization	26/355	323/15517	2.8485e-08	3.54638e-05	3.19332e-05	504245/510743/534994/525628/510083/616742/509821/532616/506201/539601/782903/782315/535165/523498/541234/513641/533729/616294/537594/522158/514644/539311/513924/100139141/538233/539979	26
E105	GO:0030029	actin filament-based process	26/355	336/15517	6.31604e-08	3.93174e-05	3.54031e-05	504245/510743/534994/525628/510083/616742/509821/532616/506201/539601/782903/782315/535165/523498/541234/513641/533729/616294/537594/522158/514644/539311/513924/100139141/538233/539979	26
E105	GO:0006897	endocytosis	17/355	191/15517	1.91511e-06	0.000725487	0.00065326	534994/281637/281638/533796/506309/509221/514134/317659/508157/535998/540808/538717/510879/281311/506218/785664/282087	17
E105	GO:0043087	regulation of GTPase activity	15/355	153/15517	2.33088e-06	0.000725487	0.00065326	540393/616246/504245/509022/534994/100295817/782315/515330/518168/507082/789713/523745/522344/535132/618784	15
E105	GO:0007264	small GTPase mediated signal transduction	18/355	231/15517	6.3552e-06	0.00158244	0.0014249	504245/510743/534994/503575/616969/510083/505572/100295817/538419/510879/615910/531459/507082/789713/789597/523745/522344/535132	18
E105	GO:0098657	import into cell	19/355	268/15517	1.3697e-05	0.00284213	0.00255918	534994/281637/281638/533796/506309/509221/514134/317659/508157/535998/540808/538717/510879/281311/282354/337925/506218/785664/282087	19
E105	GO:0006898	receptor-mediated endocytosis	9/355	65/15517	1.60319e-05	0.00285138	0.00256751	281637/281638/533796/509221/317659/540808/510879/281311/785664	9
E105	GO:0048870	cell motility	23/355	389/15517	3.29744e-05	0.00513164	0.00462075	520151/613555/510083/505572/100295817/509821/535043/513641/615854/540106/525931/537594/514644/504531/530001/100337091/514554/615910/518168/616342/539452/519843/532571	23
E105	GO:0044093	positive regulation of molecular function	20/355	322/15517	5.45758e-05	0.00754965	0.00679803	767893/504245/509022/534994/100295817/407217/505369/515330/528166/540106/525931/507082/789713/523745/522344/785924/535132/618784/530884/613590	20
E105	GO:0043547	positive regulation of GTPase activity	11/355	116/15517	7.09215e-05	0.00882972	0.00795067	504245/509022/534994/100295817/515330/507082/789713/523745/522344/535132/618784	11
E105	GO:0051128	regulation of cellular component organization	24/355	440/15517	7.99471e-05	0.00904856	0.00814772	767893/504245/510743/533796/538337/530341/509221/508157/616742/538419/506201/539601/782315/535165/523498/533729/514554/518168/530858/510651/514798/534164/538233/785664	24
E105	GO:0043085	positive regulation of catalytic activity	17/355	262/15517	0.000116256	0.0120616	0.0108608	504245/509022/534994/100295817/407217/515330/528166/540106/525931/507082/789713/523745/522344/785924/535132/618784/613590	17
E105	GO:0051345	positive regulation of hydrolase activity	12/355	146/15517	0.000134708	0.0129009	0.0116165	504245/509022/534994/100295817/515330/528166/507082/789713/523745/522344/535132/618784	12
E105	GO:0007015	actin filament organization	15/355	218/15517	0.000153368	0.0136388	0.012281	510743/534994/525628/509821/506201/539601/782903/535165/523498/541234/537594/539311/513924/100139141/538233	15
E105	GO:0016477	cell migration	19/355	329/15517	0.000215189	0.0178607	0.0160826	613555/510083/505572/100295817/535043/513641/615854/540106/525931/514644/504531/530001/100337091/615910/518168/616342/539452/519843/532571	19
E105	GO:0007167	enzyme-linked receptor protein signaling pathway	19/355	336/15517	0.000280833	0.0218523	0.0196768	338068/510393/616742/407217/540809/282879/617416/539369/540106/525931/510773/617469/785924/783254/511279/508997/535376/539055/538668	19
E105	GO:0032956	regulation of actin cytoskeleton organization	10/355	116/15517	0.000329231	0.0241113	0.0217109	504245/510743/616742/506201/539601/782315/535165/523498/533729/538233	10
E105	GO:0032970	regulation of actin filament-based process	10/355	119/15517	0.000404277	0.0279625	0.0251787	504245/510743/616742/506201/539601/782315/535165/523498/533729/538233	10
E105	GO:0051056	regulation of small GTPase mediated signal transduction	9/355	99/15517	0.000439473	0.028797	0.0259301	504245/510743/534994/616969/538419/510879/531459/507082/535132	9
E105	GO:0045944	positive regulation of transcription by RNA polymerase II	13/355	193/15517	0.000511183	0.0318211	0.0286531	407215/789336/521194/540588/407231/512254/508162/540904/530184/513640/788329/618792/614786	13
E105	GO:0031331	positive regulation of cellular catabolic process	7/355	64/15517	0.000626655	0.0343405	0.0309217	534707/521542/524155/537453/538226/533661/618601	7
E105	GO:0048488	synaptic vesicle endocytosis	5/355	31/15517	0.000634404	0.0343405	0.0309217	317659/540808/510879/785664/282087	5
E105	GO:0140238	presynaptic endocytosis	5/355	31/15517	0.000634404	0.0343405	0.0309217	317659/540808/510879/785664/282087	5
E105	GO:0007169	transmembrane receptor protein tyrosine kinase signaling pathway	14/355	226/15517	0.000726671	0.0376961	0.0339432	510393/616742/407217/282879/617416/539369/540106/525931/510773/785924/783254/508997/539055/538668	14
E105	GO:0007420	brain development	7/355	67/15517	0.000827457	0.0393601	0.0354416	282651/100125236/532565/282087/507012/533768/510844	7
E105	GO:0060322	head development	7/355	67/15517	0.000827457	0.0393601	0.0354416	282651/100125236/532565/282087/507012/533768/510844	7
E105	GO:0036465	synaptic vesicle recycling	5/355	33/15517	0.000853593	0.0393601	0.0354416	317659/540808/510879/785664/282087	5
E188	GO:0006897	endocytosis	12/226	191/15517	2.38156e-05	0.0122932	0.0112356	533796/509221/514134/317659/508157/535998/540808/538717/540503/510879/504429/281311	12
E188	GO:0051493	regulation of cytoskeleton organization	11/226	166/15517	3.19962e-05	0.0122932	0.0112356	510743/533796/515249/539601/782315/535165/523498/533729/281478/507226/617078	11
E188	GO:0033043	regulation of organelle organization	14/226	273/15517	4.84542e-05	0.0122932	0.0112356	510743/533796/537027/515249/539601/782315/535165/523498/533729/530858/281478/515350/507226/617078	14
E188	GO:0044093	positive regulation of molecular function	15/226	322/15517	7.78647e-05	0.0122932	0.0112356	512010/509022/613384/507285/281848/505369/504429/613787/519566/522344/785924/535132/614554/507226/617078	15
E188	GO:0030036	actin cytoskeleton organization	15/226	323/15517	8.06165e-05	0.0122932	0.0112356	510743/786852/525628/281753/539601/782315/535165/523498/541234/533729/537594/522158/539311/281478/538697	15
E188	GO:0051128	regulation of cellular component organization	18/226	440/15517	8.14519e-05	0.0122932	0.0112356	510743/533796/537027/515249/530341/509221/508157/539601/782315/535165/523498/533729/514554/530858/281478/515350/507226/617078	18
E188	GO:0000819	sister chromatid segregation	7/226	73/15517	9.1283e-05	0.0122932	0.0112356	537027/514679/531234/538789/353350/515350/787696	7
E188	GO:0051056	regulation of small GTPase mediated signal transduction	8/226	99/15517	9.81497e-05	0.0122932	0.0112356	510743/616969/507285/516048/510879/531459/535132/538697	8
E188	GO:0030029	actin filament-based process	15/226	336/15517	0.000124946	0.0125889	0.0115058	510743/786852/525628/281753/539601/782315/535165/523498/541234/533729/537594/522158/539311/281478/538697	15
E188	GO:0043085	positive regulation of catalytic activity	13/226	262/15517	0.000125638	0.0125889	0.0115058	512010/509022/613384/507285/281848/504429/613787/519566/522344/785924/535132/614554/507226	13
E188	GO:0098657	import into cell	13/226	268/15517	0.000157286	0.0141263	0.0129109	533796/509221/514134/317659/508157/535998/540808/538717/540503/510879/504429/281311/282354	13
E188	GO:0098813	nuclear chromosome segregation	8/226	107/15517	0.000169177	0.0141263	0.0129109	537027/533089/514679/531234/538789/353350/515350/787696	8
E188	GO:0007059	chromosome segregation	9/226	149/15517	0.000336168	0.0257872	0.0235685	537027/533089/509161/514679/531234/538789/353350/515350/787696	9
E188	GO:0006898	receptor-mediated endocytosis	6/226	65/15517	0.0003603	0.0257872	0.0235685	533796/509221/317659/540808/510879/281311	6
E188	GO:0043087	regulation of GTPase activity	9/226	153/15517	0.000408533	0.02729	0.024942	512010/616246/509022/507285/782315/519566/522344/535132/614554	9
E188	GO:0000070	mitotic sister chromatid segregation	6/226	69/15517	0.00049827	0.0312041	0.0285194	537027/514679/531234/538789/353350/515350	6
E188	GO:0007264	small GTPase mediated signal transduction	11/226	231/15517	0.000586048	0.0345424	0.0315704	510743/616969/507285/505572/516048/510879/531459/519566/522344/535132/538697	11
E188	GO:1902531	regulation of intracellular signal transduction	15/226	395/15517	0.000697049	0.0366976	0.0335402	510743/616969/515377/613384/507285/617606/516048/281848/510879/617525/533729/613787/531459/535132/538697	15
E188	GO:0046777	protein autophosphorylation	4/226	29/15517	0.000781823	0.0366976	0.0335402	281848/505369/613787/618601	4
E188	GO:0016441	post-transcriptional gene silencing	3/226	13/15517	0.000782775	0.0366976	0.0335402	506199/617525/541118	3
E188	GO:0030261	chromosome condensation	3/226	13/15517	0.000782775	0.0366976	0.0335402	531234/353350/787696	3
E188	GO:0000226	microtubule cytoskeleton organization	13/226	318/15517	0.000805735	0.0366976	0.0335402	534849/533796/515249/509161/514679/535378/525337/616342/515350/281515/507226/617078/538422	13
E188	GO:0042116	macrophage activation	3/226	14/15517	0.000985592	0.0429375	0.0392433	510910/508157/614262	3
E240	GO:0006898	receptor-mediated endocytosis	8/147	65/15517	1.71399e-07	0.000109882	0.000102183	515216/533796/281080/509221/317659/510879/281311/281421	8
E240	GO:0006897	endocytosis	12/147	191/15517	2.69649e-07	0.000109882	0.000102183	515216/533796/532865/281080/509221/317659/535998/540503/510879/504429/281311/281421	12
E240	GO:0098657	import into cell	12/147	268/15517	9.34443e-06	0.00253857	0.0023607	515216/533796/532865/281080/509221/317659/535998/540503/510879/504429/281311/281421	12
E240	GO:0043087	regulation of GTPase activity	9/147	153/15517	1.50529e-05	0.00306704	0.00285214	540393/616246/508266/100295817/518168/537312/282532/787248/100138040	9
E240	GO:0051056	regulation of small GTPase mediated signal transduction	7/147	99/15517	4.2683e-05	0.00695733	0.00646985	510743/508266/536760/510879/531459/282532/787248	7
E240	GO:0007264	small GTPase mediated signal transduction	10/147	231/15517	7.05317e-05	0.00958056	0.00890927	510743/508266/536760/100295817/510879/531459/537312/282532/787248/100138040	10
E240	GO:0043085	positive regulation of catalytic activity	10/147	262/15517	0.000198389	0.0230982	0.0214797	613384/508266/533523/100295817/504429/528166/613787/537312/787248/100138040	10
E240	GO:0044093	positive regulation of molecular function	11/147	322/15517	0.000249773	0.0254456	0.0236627	613384/508266/533523/100295817/505369/504429/528166/613787/537312/787248/100138040	11
E240	GO:0045807	positive regulation of endocytosis	3/147	15/15517	0.000348648	0.0315721	0.0293599	533796/532865/509221	3
E240	GO:0051336	regulation of hydrolase activity	10/147	296/15517	0.000522207	0.0425599	0.0395778	540393/616246/508266/100295817/528166/518168/537312/282532/787248/100138040	10
E280	GO:0032496	response to lipopolysaccharide	15/408	44/15517	1.76353e-13	2.46894e-10	1.94359e-10	280734/281048/407131/281214/613667/281735/280828/281212/281250/281251/616818/532569/526103/100336382/100298642	15
E280	GO:0006954	inflammatory response	26/408	171/15517	4.34627e-13	2.50335e-10	1.97068e-10	280677/493645/282170/414347/281048/286849/281057/282661/281214/613667/281735/280828/281212/281249/281250/281251/281860/404154/539780/616115/526392/538639/616818/532569/281534/338033	26
E280	GO:0002237	response to molecule of bacterial origin	15/408	47/15517	5.36431e-13	2.50335e-10	1.97068e-10	280734/281048/407131/281214/613667/281735/280828/281212/281250/281251/616818/532569/526103/100336382/100298642	15
E280	GO:0071216	cellular response to biotic stimulus	14/408	48/15517	1.2933e-11	4.2017e-09	3.30766e-09	280734/281048/407131/281214/613667/281735/280828/281212/281250/281251/513730/526103/100336382/100298642	14
E280	GO:0071222	cellular response to lipopolysaccharide	13/408	40/15517	1.50061e-11	4.2017e-09	3.30766e-09	280734/281048/407131/281214/613667/281735/280828/281212/281250/281251/526103/100336382/100298642	13
E280	GO:0009607	response to biotic stimulus	35/408	363/15517	3.21411e-11	7.43015e-09	5.84915e-09	614292/280734/282170/414347/281048/286849/407131/511671/281214/613667/281735/280828/281212/280814/281250/281251/534996/539780/616115/526392/512480/513730/541148/526865/282467/616818/532569/510814/515515/281534/493686/526103/100336382/100298642/404547	35
E280	GO:0044419	biological process involved in interspecies interaction between organisms	35/408	365/15517	3.74876e-11	7.43015e-09	5.84915e-09	614292/280734/282170/414347/281048/286849/407131/511671/281214/613667/281735/280828/281212/280814/281250/281251/534996/539780/534360/616115/526392/512480/541148/526865/282467/616818/532569/510814/515515/281534/493686/526103/100336382/100298642/404547	35
E280	GO:0071219	cellular response to molecule of bacterial origin	13/408	43/15517	4.2458e-11	7.43015e-09	5.84915e-09	280734/281048/407131/281214/613667/281735/280828/281212/281250/281251/526103/100336382/100298642	13
E280	GO:0043207	response to external biotic stimulus	34/408	361/15517	1.17616e-10	1.64662e-08	1.29625e-08	614292/280734/282170/414347/281048/286849/407131/511671/281214/613667/281735/280828/281212/280814/281250/281251/534996/539780/616115/526392/512480/541148/526865/282467/616818/532569/510814/515515/281534/493686/526103/100336382/100298642/404547	34
E280	GO:0051707	response to other organism	34/408	361/15517	1.17616e-10	1.64662e-08	1.29625e-08	614292/280734/282170/414347/281048/286849/407131/511671/281214/613667/281735/280828/281212/280814/281250/281251/534996/539780/616115/526392/512480/541148/526865/282467/616818/532569/510814/515515/281534/493686/526103/100336382/100298642/404547	34
E280	GO:0034097	response to cytokine	26/408	248/15517	2.03734e-09	2.50222e-07	1.96979e-07	282170/414347/286849/511671/281214/613667/281735/280828/281212/282257/407110/281250/281251/281860/404154/521554/515034/510342/537201/525246/616115/526392/614134/510814/508541/512484	26
E280	GO:0033993	response to lipid	15/408	80/15517	2.14476e-09	2.50222e-07	1.96979e-07	280734/281048/407131/281214/613667/281735/280828/281212/281250/281251/616818/532569/526103/100336382/100298642	15
E280	GO:0071396	cellular response to lipid	13/408	67/15517	1.6608e-08	1.78855e-06	1.40798e-06	280734/281048/407131/281214/613667/281735/280828/281212/281250/281251/526103/100336382/100298642	13
E280	GO:0071310	cellular response to organic substance	34/408	441/15517	2.08765e-08	2.08765e-06	1.64343e-06	530610/280734/282170/414347/281048/286849/407131/281214/613667/281735/280828/281212/282257/407110/281250/281251/281860/404154/521554/515034/510342/537201/525246/525346/512571/282031/327708/614134/510814/508541/526103/100336382/100298642/512484	34
E280	GO:0071345	cellular response to cytokine stimulus	23/408	229/15517	3.95921e-08	3.69527e-06	2.90898e-06	282170/414347/286849/281214/613667/281735/280828/281212/282257/407110/281250/281251/281860/404154/521554/515034/510342/537201/525246/614134/510814/508541/512484	23
E280	GO:0140546	defense response to symbiont	25/408	269/15517	4.74869e-08	4.15511e-06	3.27097e-06	614292/280734/282170/414347/281048/286849/511671/281214/613667/281735/280828/281212/280814/534996/616115/526392/541148/526865/282467/532569/510814/515515/281534/493686/404547	25
E280	GO:0019221	cytokine-mediated signaling pathway	22/408	222/15517	9.95815e-08	8.20083e-06	6.45584e-06	282170/414347/281214/613667/281735/280828/281212/282257/407110/281250/281251/281860/404154/521554/515034/510342/537201/525246/614134/510814/508541/512484	22
E280	GO:0098542	defense response to other organism	27/408	332/15517	2.15826e-07	1.67865e-05	1.32146e-05	614292/280734/282170/414347/281048/286849/511671/281214/613667/281735/280828/281212/280814/534996/539780/616115/526392/512480/541148/526865/282467/532569/510814/515515/281534/493686/404547	27
E280	GO:0030593	neutrophil chemotaxis	10/408	46/15517	2.47532e-07	1.82392e-05	1.43582e-05	282170/414347/281214/613667/281735/280828/281212/616818/532569/404547	10
E280	GO:0009617	response to bacterium	18/408	162/15517	2.68122e-07	1.87686e-05	1.4775e-05	280734/281048/407131/281214/613667/281735/280828/281212/281250/281251/539780/512480/616818/532569/526103/100336382/100298642/404547	18
E280	GO:1990266	neutrophil migration	10/408	50/15517	5.67875e-07	3.78583e-05	2.98027e-05	282170/414347/281214/613667/281735/280828/281212/616818/532569/404547	10
E280	GO:0016477	cell migration	26/408	329/15517	6.30883e-07	3.97845e-05	3.13191e-05	539902/282170/414347/286849/511671/281214/613667/281735/280828/539421/503620/540105/281212/282642/509732/537790/282467/616818/532569/508133/785942/516019/508105/404547/521961/520730	26
E280	GO:0050865	regulation of cell activation	15/408	121/15517	6.53602e-07	3.97845e-05	3.13191e-05	280734/327677/286849/407131/281248/281250/281251/510813/614460/509732/526865/327666/529990/515515/338033	15
E280	GO:1901700	response to oxygen-containing compound	20/408	211/15517	7.7865e-07	4.54212e-05	3.57564e-05	280734/281048/407131/281214/613667/281735/280828/281212/281250/281251/512571/282031/327708/616818/532569/510814/508541/526103/100336382/100298642	20
E280	GO:0032944	regulation of mononuclear cell proliferation	9/408	41/15517	9.14042e-07	4.73948e-05	3.731e-05	327677/286849/407131/281248/281250/281251/510813/515515/338033	9
E280	GO:0050670	regulation of lymphocyte proliferation	9/408	41/15517	9.14042e-07	4.73948e-05	3.731e-05	327677/286849/407131/281248/281250/281251/510813/515515/338033	9
E280	GO:0070663	regulation of leukocyte proliferation	9/408	41/15517	9.14042e-07	4.73948e-05	3.731e-05	327677/286849/407131/281248/281250/281251/510813/515515/338033	9
E280	GO:0071621	granulocyte chemotaxis	10/408	53/15517	1.0047e-06	5.02352e-05	3.95461e-05	282170/414347/281214/613667/281735/280828/281212/616818/532569/404547	10
E280	GO:0032946	positive regulation of mononuclear cell proliferation	7/408	23/15517	1.40574e-06	6.33123e-05	4.98406e-05	327677/286849/407131/281248/281250/281251/515515	7
E280	GO:0050671	positive regulation of lymphocyte proliferation	7/408	23/15517	1.40574e-06	6.33123e-05	4.98406e-05	327677/286849/407131/281248/281250/281251/515515	7
E280	GO:0070665	positive regulation of leukocyte proliferation	7/408	23/15517	1.40574e-06	6.33123e-05	4.98406e-05	327677/286849/407131/281248/281250/281251/515515	7
E280	GO:0030595	leukocyte chemotaxis	11/408	68/15517	1.44714e-06	6.33123e-05	4.98406e-05	282170/414347/511671/281214/613667/281735/280828/281212/616818/532569/404547	11
E280	GO:0097530	granulocyte migration	10/408	57/15517	2.02588e-06	8.59463e-05	6.76585e-05	282170/414347/281214/613667/281735/280828/281212/616818/532569/404547	10
E280	GO:0002694	regulation of leukocyte activation	14/408	116/15517	2.13611e-06	8.79573e-05	6.92416e-05	280734/327677/286849/407131/281248/281250/281251/510813/614460/526865/327666/529990/515515/338033	14
E280	GO:1901701	cellular response to oxygen-containing compound	17/408	172/15517	2.96903e-06	0.000118761	9.34911e-05	280734/281048/407131/281214/613667/281735/280828/281212/281250/281251/512571/282031/327708/508541/526103/100336382/100298642	17
E280	GO:0002682	regulation of immune system process	27/408	389/15517	4.62124e-06	0.000179715	0.000141475	614292/539020/280734/280677/493645/281048/327677/286849/407131/514076/281096/535347/281248/281250/281251/510813/614460/407152/526865/617840/327666/529990/515515/281534/493686/338033/523809	27
E280	GO:0097529	myeloid leukocyte migration	10/408	67/15517	9.20581e-06	0.000348328	0.00027421	282170/414347/281214/613667/281735/280828/281212/616818/532569/404547	10
E280	GO:0022407	regulation of cell-cell adhesion	11/408	83/15517	1.07023e-05	0.000394297	0.000310398	282661/407131/281248/281250/281251/510813/614460/509732/327666/529990/515515	11
E280	GO:0007159	leukocyte cell-cell adhesion	11/408	84/15517	1.20287e-05	0.000423389	0.000333299	407131/281248/281250/281251/510813/614460/616818/532569/327666/529990/515515	11
E280	GO:0051249	regulation of lymphocyte activation	12/408	100/15517	1.20968e-05	0.000423389	0.000333299	327677/286849/407131/281248/281250/281251/510813/614460/327666/529990/515515/338033	12
E280	GO:0048870	cell motility	26/408	389/15517	1.35401e-05	0.000462346	0.000363967	539902/282170/414347/286849/511671/281214/613667/281735/280828/539421/503620/540105/281212/282642/509732/537790/282467/616818/532569/508133/785942/516019/508105/404547/521961/520730	26
E280	GO:0098609	cell-cell adhesion	23/408	327/15517	1.91061e-05	0.000636869	0.000501355	282661/407131/281248/281250/281251/281873/281875/783681/510813/524132/534360/513730/614460/100125301/509732/526865/616818/532569/327666/529990/515515/509726/523809	23
E280	GO:0050900	leukocyte migration	11/408	89/15517	2.10273e-05	0.00068461	0.000538937	282170/414347/511671/281214/613667/281735/280828/281212/616818/532569/404547	11
E280	GO:0042129	regulation of T cell proliferation	7/408	34/15517	2.40247e-05	0.000764422	0.000601767	407131/281248/281250/281251/510813/515515/338033	7
E280	GO:0022409	positive regulation of cell-cell adhesion	9/408	60/15517	2.48044e-05	0.000771692	0.00060749	282661/407131/281248/281250/281251/509732/327666/529990/515515	9
E280	GO:0042098	T cell proliferation	7/408	35/15517	2.93576e-05	0.000893491	0.000703372	407131/281248/281250/281251/510813/515515/338033	7
E280	GO:0006935	chemotaxis	14/408	146/15517	3.11345e-05	0.00090809	0.000714865	493645/282170/414347/511671/281214/613667/281735/280828/281212/616818/532569/785942/516019/404547	14
E280	GO:0042330	taxis	14/408	146/15517	3.11345e-05	0.00090809	0.000714865	493645/282170/414347/511671/281214/613667/281735/280828/281212/616818/532569/785942/516019/404547	14
E280	GO:0050863	regulation of T cell activation	10/408	78/15517	3.6123e-05	0.00103208	0.000812476	407131/281248/281250/281251/510813/614460/327666/529990/515515/338033	10
E280	GO:0060326	cell chemotaxis	11/408	95/15517	3.90488e-05	0.00107314	0.000844796	282170/414347/511671/281214/613667/281735/280828/281212/616818/532569/404547	11
E280	GO:0007155	cell adhesion	29/408	488/15517	3.9093e-05	0.00107314	0.000844796	281614/281057/282661/407131/281248/281250/281251/281873/281875/282642/783681/510813/524132/534360/521854/513730/614460/100125301/509732/526865/616818/532569/327666/529990/515515/509726/523809/282662/783645	29
E280	GO:0045087	innate immune response	17/408	216/15517	5.8986e-05	0.00158809	0.00125017	614292/280734/282170/414347/281048/286849/511671/280814/534996/616115/526392/541148/526865/510814/515515/281534/493686	17
E280	GO:0061844	antimicrobial humoral immune response mediated by antimicrobial peptide	7/408	39/15517	6.13319e-05	0.00162009	0.00127536	281214/613667/281735/280828/281212/282467/532569	7
E280	GO:0051239	regulation of multicellular organismal process	28/408	476/15517	6.34652e-05	0.00164539	0.00129528	539020/506945/280734/281048/327677/286849/407131/281096/524222/503620/281248/281250/281251/510342/510813/614460/509732/526865/785942/516019/281375/327666/529990/515515/493686/338033/523809/520730	28
E280	GO:0002696	positive regulation of leukocyte activation	10/408	84/15517	6.89096e-05	0.00172274	0.00135617	327677/286849/407131/281248/281250/281251/526865/327666/529990/515515	10
E280	GO:0050867	positive regulation of cell activation	10/408	84/15517	6.89096e-05	0.00172274	0.00135617	327677/286849/407131/281248/281250/281251/526865/327666/529990/515515	10
E280	GO:0070098	chemokine-mediated signaling pathway	7/408	40/15517	7.2678e-05	0.00172456	0.00135761	282170/414347/281214/613667/281735/280828/281212	7
E280	GO:1990868	response to chemokine	7/408	40/15517	7.2678e-05	0.00172456	0.00135761	282170/414347/281214/613667/281735/280828/281212	7
E280	GO:1990869	cellular response to chemokine	7/408	40/15517	7.2678e-05	0.00172456	0.00135761	282170/414347/281214/613667/281735/280828/281212	7
E280	GO:0000165	MAPK cascade	14/408	158/15517	7.43955e-05	0.0017359	0.00136653	282170/414347/281057/618644/282488/408017/510342/537380/506787/614838/100139484/768210/614134/519081	14
E280	GO:0042102	positive regulation of T cell proliferation	5/408	18/15517	7.91779e-05	0.0018172	0.00143053	407131/281248/281250/281251/515515	5
E280	GO:0045785	positive regulation of cell adhesion	9/408	70/15517	8.65645e-05	0.00195468	0.00153876	282661/407131/281248/281250/281251/509732/327666/529990/515515	9
E280	GO:0001775	cell activation	18/408	245/15517	8.79945e-05	0.00195543	0.00153935	280734/327677/286849/407131/281248/281250/281251/510813/614460/509732/526865/327666/529990/281489/515515/338033/574056/523809	18
E280	GO:0002684	positive regulation of immune system process	20/408	291/15517	9.14422e-05	0.0020003	0.00157467	614292/280677/493645/281048/327677/286849/407131/514076/535347/281248/281250/281251/407152/526865/617840/327666/529990/515515/281534/493686	20
E280	GO:0043408	regulation of MAPK cascade	13/408	142/15517	9.58995e-05	0.00206553	0.00162602	282170/414347/281057/618644/282488/408017/510342/506787/614838/100139484/768210/614134/519081	13
E280	GO:0001816	cytokine production	11/408	106/15517	0.000107406	0.00226032	0.00177936	539020/280734/281048/286849/281248/510342/510813/538523/493686/338033/404547	11
E280	GO:0051251	positive regulation of lymphocyte activation	9/408	72/15517	0.000108172	0.00226032	0.00177936	327677/286849/407131/281248/281250/281251/327666/529990/515515	9
E280	GO:0018108	peptidyl-tyrosine phosphorylation	7/408	43/15517	0.000117378	0.00241661	0.0019024	525906/286849/281248/537201/525246/407152/512484	7
E280	GO:1903037	regulation of leukocyte cell-cell adhesion	9/408	73/15517	0.000120565	0.00244625	0.00192573	407131/281248/281250/281251/510813/614460/327666/529990/515515	9
E280	GO:1902531	regulation of intracellular signal transduction	24/408	395/15517	0.000129613	0.00259226	0.00204067	539902/282170/414347/281048/286849/281057/529235/618644/512581/282488/408017/510342/538639/506787/614838/100139484/533491/768210/614134/282467/519081/526103/616801/520730	24
E280	GO:0018212	peptidyl-tyrosine modification	7/408	45/15517	0.000157994	0.00311538	0.00245248	525906/286849/281248/537201/525246/407152/512484	7
E280	GO:0071347	cellular response to interleukin-1	6/408	32/15517	0.0001616	0.00314222	0.00247361	282170/414347/286849/281860/515034/510342	6
E280	GO:0055082	cellular chemical homeostasis	14/408	173/15517	0.000195613	0.00375147	0.00295323	523889/282144/282148/504799/519695/788926/507899/282705/515437/508193/510209/513684/407151/523809	14
E280	GO:0030155	regulation of cell adhesion	11/408	116/15517	0.000240311	0.00448065	0.00352725	282661/407131/281248/281250/281251/510813/614460/509732/327666/529990/515515	11
E280	GO:0007249	I-kappaB kinase/NF-kappaB signaling	9/408	80/15517	0.000245016	0.00448065	0.00352725	286849/616115/526392/614134/282467/539513/493686/526103/616801	9
E280	GO:0006873	cellular ion homeostasis	13/408	156/15517	0.000246436	0.00448065	0.00352725	523889/282144/282148/504799/519695/507899/282705/515437/508193/510209/513684/407151/523809	13
E280	GO:0030003	cellular cation homeostasis	13/408	156/15517	0.000246436	0.00448065	0.00352725	523889/282144/282148/504799/519695/507899/282705/515437/508193/510209/513684/407151/523809	13
E280	GO:0002253	activation of immune response	12/408	136/15517	0.000249998	0.00448714	0.00353236	280677/493645/281048/286849/514076/535347/407152/526865/617840/515515/281534/493686	12
E280	GO:0045321	leukocyte activation	16/408	221/15517	0.000253775	0.00449729	0.00354034	280734/327677/286849/407131/281248/281250/281251/510813/614460/526865/327666/529990/281489/515515/338033/574056	16
E280	GO:0070555	response to interleukin-1	6/408	35/15517	0.000270812	0.00473921	0.0037308	282170/414347/286849/281860/515034/510342	6
E280	GO:0006915	apoptotic process	22/408	366/15517	0.000285355	0.00493207	0.00388261	282151/514386/541141/338039/286849/497199/540873/529235/282488/510158/282326/505455/537380/514225/539780/512480/513730/281402/282705/511373/534620/338033	22
E280	GO:0019725	cellular homeostasis	15/408	202/15517	0.000299597	0.00511506	0.00402667	523889/282144/282148/504799/519695/788926/507899/282705/515437/508193/510209/513684/407151/282388/523809	15
E280	GO:0042060	wound healing	8/408	66/15517	0.000322815	0.00544508	0.00428646	539902/512581/280686/513597/509732/281375/515515/523809	8
E280	GO:0040011	locomotion	17/408	249/15517	0.000328107	0.00546846	0.00430487	493645/282170/414347/286849/511671/281214/613667/281735/280828/539421/281212/509732/616818/532569/785942/516019/404547	17
E280	GO:0044093	positive regulation of molecular function	20/408	322/15517	0.000351363	0.00578715	0.00455575	511889/512010/539902/282170/414347/286849/539421/282488/503620/505919/539334/408017/515034/510342/538639/614838/506971/785942/537682/540203	20
E280	GO:0030148	sphingolipid biosynthetic process	7/408	52/15517	0.000397753	0.00647505	0.00509727	615110/616901/617293/533538/537972/615641/514357	7
E280	GO:0012501	programmed cell death	22/408	377/15517	0.000428334	0.00689273	0.00542608	282151/514386/541141/338039/286849/497199/540873/529235/282488/510158/282326/505455/537380/514225/539780/512480/513730/281402/282705/511373/534620/338033	22
E280	GO:0009967	positive regulation of signal transduction	18/408	279/15517	0.000438153	0.00697061	0.00548739	282170/414347/281048/286849/281057/512581/521554/408017/506787/614838/526865/100139484/768210/614134/282467/510979/508105/616801	18
E280	GO:0008219	cell death	22/408	378/15517	0.000444003	0.00698432	0.00549818	282151/514386/541141/338039/286849/497199/540873/529235/282488/510158/282326/505455/537380/514225/539780/512480/513730/281402/282705/511373/534620/338033	22
E280	GO:0051345	positive regulation of hydrolase activity	12/408	146/15517	0.0004797	0.007462	0.00587422	511889/512010/539902/282170/414347/539421/282488/505919/538639/506971/785942/537682	12
E280	GO:0006509	membrane protein ectodomain proteolysis	4/408	15/15517	0.000510686	0.00773271	0.00608732	517541/510907/282705/338033	4
E280	GO:0038061	NIK/NF-kappaB signaling	4/408	15/15517	0.000510686	0.00773271	0.00608732	281048/616115/526392/538639	4
E280	GO:0051241	negative regulation of multicellular organismal process	10/408	107/15517	0.000513673	0.00773271	0.00608732	280734/407131/510342/510813/614460/785942/516019/281375/523809/520730	10
E280	GO:0048585	negative regulation of response to stimulus	19/408	308/15517	0.000533385	0.00786241	0.00618943	539902/525906/497199/282684/529235/618644/281860/510342/538639/533491/785942/516019/281375/527910/513902/519081/338033/526103/523809	19
E280	GO:0009611	response to wounding	8/408	71/15517	0.00053352	0.00786241	0.00618943	539902/512581/280686/513597/509732/281375/515515/523809	8
E280	GO:0051240	positive regulation of multicellular organismal process	15/408	214/15517	0.000552132	0.00805192	0.00633862	281048/327677/286849/407131/503620/281248/281250/281251/509732/526865/327666/529990/515515/493686/338033	15
E280	GO:0050870	positive regulation of T cell activation	7/408	55/15517	0.000563921	0.00805601	0.00634184	407131/281248/281250/281251/327666/529990/515515	7
E280	GO:1903039	positive regulation of leukocyte cell-cell adhesion	7/408	55/15517	0.000563921	0.00805601	0.00634184	407131/281248/281250/281251/327666/529990/515515	7
E280	GO:0002757	immune response-activating signal transduction	10/408	109/15517	0.000595021	0.00841444	0.006624	493645/281048/286849/535347/407152/526865/617840/515515/281534/493686	10
E280	GO:0019730	antimicrobial humoral response	7/408	56/15517	0.000630146	0.00882204	0.00694487	281214/613667/281735/280828/281212/282467/532569	7
E280	GO:0043087	regulation of GTPase activity	12/408	153/15517	0.000729796	0.010116	0.00796349	511889/512010/539902/282170/414347/539421/280877/533491/506971/785942/537682/521961	12
E280	GO:0046649	lymphocyte activation	14/408	198/15517	0.000768154	0.0105433	0.00829987	327677/286849/407131/281248/281250/281251/510813/614460/327666/529990/281489/515515/338033/574056	14
E280	GO:0002764	immune response-regulating signaling pathway	10/408	113/15517	0.00078982	0.0107354	0.00845111	493645/281048/286849/535347/407152/526865/617840/515515/281534/493686	10
E280	GO:0051336	regulation of hydrolase activity	18/408	296/15517	0.000874855	0.0117769	0.00927098	511889/512010/539902/281039/282170/414347/539421/282488/505919/539780/280877/538639/533491/506971/785942/281375/537682/521961	18
E280	GO:0050776	regulation of immune response	15/408	224/15517	0.000884197	0.0117893	0.00928075	614292/280677/493645/281048/286849/514076/535347/281248/407152/526865/617840/515515/281534/493686/338033	15
E280	GO:0050778	positive regulation of immune response	14/408	203/15517	0.000979355	0.0129349	0.0101826	614292/280677/493645/281048/286849/514076/535347/281248/407152/526865/617840/515515/281534/493686	14
E280	GO:0001817	regulation of cytokine production	9/408	97/15517	0.00102106	0.0133127	0.01048	539020/280734/281048/286849/281248/510342/510813/493686/338033	9
E280	GO:1902533	positive regulation of intracellular signal transduction	14/408	204/15517	0.00102698	0.0133127	0.01048	282170/414347/281048/286849/281057/512581/408017/506787/614838/100139484/768210/614134/282467/616801	14
E280	GO:0043410	positive regulation of MAPK cascade	9/408	98/15517	0.0010988	0.014113	0.01111	282170/414347/281057/408017/506787/614838/100139484/768210/614134	9
E280	GO:0005975	carbohydrate metabolic process	17/408	278/15517	0.00113513	0.0144471	0.011373	282407/286869/528860/534506/615745/505987/616031/786335/788926/407183/534928/507476/512571/513276/783536/504407/281565	17
E280	GO:0055080	cation homeostasis	13/408	186/15517	0.00130225	0.0164248	0.0129299	523889/282144/282148/504799/519695/507899/282705/515437/508193/510209/513684/407151/523809	13
E280	GO:0032101	regulation of response to external stimulus	12/408	164/15517	0.00133774	0.0167218	0.0131637	614292/281048/286849/282661/538639/526865/785942/516019/281375/281534/493686/338033	12
E280	GO:0019751	polyol metabolic process	6/408	47/15517	0.00137402	0.0168837	0.0132911	615110/286815/505987/616031/534051/537972	6
E280	GO:2000116	regulation of cysteine-type endopeptidase activity	5/408	32/15517	0.00137481	0.0168837	0.0132911	281039/282488/505919/539780/538639	5
E280	GO:0043085	positive regulation of catalytic activity	16/408	262/15517	0.00159313	0.0193947	0.0152678	511889/512010/539902/282170/414347/539421/282488/503620/505919/408017/538639/614838/506971/785942/537682/540203	16
E280	GO:0032943	mononuclear cell proliferation	9/408	104/15517	0.00167178	0.0196664	0.0154817	327677/286849/407131/281248/281250/281251/510813/515515/338033	9
E280	GO:0046651	lymphocyte proliferation	9/408	104/15517	0.00167178	0.0196664	0.0154817	327677/286849/407131/281248/281250/281251/510813/515515/338033	9
E280	GO:0070661	leukocyte proliferation	9/408	104/15517	0.00167178	0.0196664	0.0154817	327677/286849/407131/281248/281250/281251/510813/515515/338033	9
E280	GO:0031349	positive regulation of defense response	7/408	66/15517	0.00169066	0.0196664	0.0154817	614292/281048/286849/282661/526865/281534/493686	7
E280	GO:0010647	positive regulation of cell communication	18/408	314/15517	0.00169973	0.0196664	0.0154817	282170/414347/281048/286849/281057/512581/521554/408017/506787/614838/526865/100139484/768210/614134/282467/510979/508105/616801	18
E280	GO:0023056	positive regulation of signaling	18/408	314/15517	0.00169973	0.0196664	0.0154817	282170/414347/281048/286849/281057/512581/521554/408017/506787/614838/526865/100139484/768210/614134/282467/510979/508105/616801	18
E280	GO:0050801	ion homeostasis	13/408	192/15517	0.00173257	0.0198819	0.0156514	523889/282144/282148/504799/519695/507899/282705/515437/508193/510209/513684/407151/523809	13
E280	GO:0009968	negative regulation of signal transduction	15/408	241/15517	0.00183369	0.0203203	0.0159965	539902/525906/497199/282684/529235/618644/281860/510342/538639/533491/527910/513902/519081/526103/523809	15
E280	GO:0045862	positive regulation of proteolysis	7/408	67/15517	0.00184611	0.0203203	0.0159965	282488/505919/538639/524166/540195/509774/338033	7
E280	GO:0030097	hemopoiesis	11/408	148/15517	0.00185204	0.0203203	0.0159965	281096/533317/281250/281251/521554/537201/525246/529631/515515/574056/523809	11
E280	GO:0001818	negative regulation of cytokine production	3/408	10/15517	0.00188689	0.0203203	0.0159965	280734/510342/510813	3
E280	GO:0007260	tyrosine phosphorylation of STAT protein	3/408	10/15517	0.00188689	0.0203203	0.0159965	286849/281248/537201	3
E280	GO:0050766	positive regulation of phagocytosis	3/408	10/15517	0.00188689	0.0203203	0.0159965	282661/327666/529990	3
E280	GO:0051452	intracellular pH reduction	3/408	10/15517	0.00188689	0.0203203	0.0159965	282148/504799/513684	3
E280	GO:0070527	platelet aggregation	3/408	10/15517	0.00188689	0.0203203	0.0159965	509732/515515/523809	3
E280	GO:0033619	membrane protein proteolysis	4/408	21/15517	0.00197636	0.0211215	0.0166272	517541/510907/282705/338033	4
E280	GO:0002768	immune response-regulating cell surface receptor signaling pathway	8/408	87/15517	0.00203694	0.0216039	0.017007	493645/281048/286849/535347/407152/526865/617840/515515	8
E280	GO:0046513	ceramide biosynthetic process	5/408	35/15517	0.00207783	0.0218719	0.0172179	616901/533538/537972/615641/514357	5
E280	GO:0042592	homeostatic process	18/408	322/15517	0.00223746	0.0232045	0.018267	523889/282144/282148/504799/282488/519695/533317/788926/408017/507899/282705/515437/508193/510209/513684/407151/282388/523809	18
E280	GO:0010648	negative regulation of cell communication	15/408	246/15517	0.00223758	0.0232045	0.018267	539902/525906/497199/282684/529235/618644/281860/510342/538639/533491/527910/513902/519081/526103/523809	15
E280	GO:0031347	regulation of defense response	9/408	109/15517	0.00231358	0.0237758	0.0187167	614292/281048/286849/282661/538639/526865/281534/493686/338033	9
E280	GO:0023057	negative regulation of signaling	15/408	247/15517	0.00232663	0.0237758	0.0187167	539902/525906/497199/282684/529235/618644/281860/510342/538639/533491/527910/513902/519081/526103/523809	15
E280	GO:0006801	superoxide metabolic process	4/408	22/15517	0.00236597	0.0237959	0.0187326	281345/507859/518356/281496	4
E280	GO:0051453	regulation of intracellular pH	4/408	22/15517	0.00236597	0.0237959	0.0187326	282148/504799/510209/513684	4
E280	GO:0001525	angiogenesis	7/408	70/15517	0.00237959	0.0237959	0.0187326	527140/286849/503620/281873/281875/508150/281375	7
E280	GO:0035295	tube development	8/408	90/15517	0.00252458	0.0250668	0.019733	527140/286849/503620/281873/281875/509732/508150/281375	8
E280	GO:0006672	ceramide metabolic process	6/408	53/15517	0.00257436	0.025381	0.0199804	615110/616901/533538/537972/615641/514357	6
E280	GO:0006470	protein dephosphorylation	11/408	156/15517	0.00279997	0.0274123	0.0215794	618644/508658/531877/505220/407152/505285/540575/508150/511408/512652/523809	11
E280	GO:0042981	regulation of apoptotic process	16/408	278/15517	0.0028932	0.0281283	0.0221431	282151/514386/541141/338039/286849/497199/540873/282488/282326/505455/514225/539780/512480/281402/282705/511373	16
E280	GO:0042110	T cell activation	11/408	158/15517	0.00308955	0.0298301	0.0234828	407131/281248/281250/281251/510813/614460/327666/529990/515515/338033/574056	11
E280	GO:0007157	heterophilic cell-cell adhesion via plasma membrane cell adhesion molecules	4/408	24/15517	0.00329743	0.0312775	0.0246222	783681/534360/513730/509726	4
E280	GO:0030641	regulation of cellular pH	4/408	24/15517	0.00329743	0.0312775	0.0246222	282148/504799/510209/513684	4
E280	GO:0050764	regulation of phagocytosis	3/408	12/15517	0.00332645	0.0312775	0.0246222	282661/327666/529990	3
E280	GO:0043067	regulation of programmed cell death	16/408	282/15517	0.00332882	0.0312775	0.0246222	282151/514386/541141/338039/286849/497199/540873/282488/282326/505455/514225/539780/512480/281402/282705/511373	16
E280	GO:0072524	pyridine-containing compound metabolic process	6/408	56/15517	0.00340882	0.0318157	0.0250459	788926/520327/514168/507476/512571/504407	6
E280	GO:0043547	positive regulation of GTPase activity	9/408	116/15517	0.00352538	0.0326857	0.0257307	511889/512010/539902/282170/414347/539421/506971/785942/537682	9
E280	GO:0030162	regulation of proteolysis	11/408	162/15517	0.0037409	0.0344557	0.0271241	281039/282488/505919/540948/539780/538639/524166/540195/509774/281375/338033	11
E280	GO:0050793	regulation of developmental process	18/408	340/15517	0.00398413	0.0364561	0.0286989	506945/286849/281678/281096/524222/503620/540105/513730/509732/104968451/529631/785942/516019/281375/515515/338033/523809/520730	18
E280	GO:0001568	blood vessel development	7/408	77/15517	0.00408301	0.0368788	0.0290317	527140/286849/503620/281873/281875/508150/281375	7
E280	GO:0048514	blood vessel morphogenesis	7/408	77/15517	0.00408301	0.0368788	0.0290317	527140/286849/503620/281873/281875/508150/281375	7
E280	GO:0034109	homotypic cell-cell adhesion	3/408	13/15517	0.00424071	0.0380577	0.0299597	509732/515515/523809	3
E280	GO:0005996	monosaccharide metabolic process	7/408	78/15517	0.00438671	0.0391172	0.0307938	534506/407183/534928/507476/513276/783536/504407	7
E280	GO:0051092	positive regulation of NF-kappaB transcription factor activity	4/408	26/15517	0.00445134	0.0391942	0.0308544	286849/539334/515034/510342	4
E280	GO:0070482	response to oxygen levels	4/408	26/15517	0.00445134	0.0391942	0.0308544	529235/534075/281814/509732	4
E280	GO:1902532	negative regulation of intracellular signal transduction	8/408	99/15517	0.00454945	0.0398077	0.0313373	539902/529235/618644/510342/538639/533491/519081/526103	8
E280	GO:0048878	chemical homeostasis	15/408	266/15517	0.0046615	0.0405348	0.0319097	523889/282144/282148/504799/519695/788926/408017/507899/282705/515437/508193/510209/513684/407151/523809	15
E280	GO:0006665	sphingolipid metabolic process	7/408	79/15517	0.00470718	0.0406793	0.0320235	615110/616901/617293/533538/537972/615641/514357	7
E280	GO:0045089	positive regulation of innate immune response	6/408	60/15517	0.00481511	0.0413567	0.0325568	614292/281048/286849/526865/281534/493686	6
E280	GO:0046173	polyol biosynthetic process	4/408	27/15517	0.00511872	0.0436964	0.0343986	615110/286815/534051/537972	4
E280	GO:0044403	biological process involved in symbiotic interaction	3/408	14/15517	0.00529298	0.0446396	0.0351411	534360/526865/404547	3
E280	GO:0046631	alpha-beta T cell activation	3/408	14/15517	0.00529298	0.0446396	0.0351411	510813/515515/574056	3
E280	GO:0001944	vasculature development	7/408	81/15517	0.00540068	0.0452751	0.0356414	527140/286849/503620/281873/281875/508150/281375	7
E280	GO:0006959	humoral immune response	10/408	147/15517	0.0055138	0.0459483	0.0361713	280677/514076/281214/613667/281735/280828/281212/282467/532569/616801	10
E280	GO:0002429	immune response-activating cell surface receptor signaling pathway	7/408	82/15517	0.00577485	0.047839	0.0376597	493645/281048/535347/407152/526865/617840/515515	7
E280	GO:0002274	myeloid leukocyte activation	4/408	28/15517	0.00584995	0.048176	0.037925	280734/281248/526865/515515	4
E280	GO:0016311	dephosphorylation	13/408	222/15517	0.00599969	0.0491203	0.0386684	618644/508658/531877/505220/407152/505285/540575/508150/511408/785942/512652/516555/523809	13
E30	GO:0006412	translation	116/694	417/15517	8.52025e-61	1.30615e-57	1.10404e-57	540610/504831/282220/520875/516473/326581/281138/509764/511189/513481/534882/515226/534165/513793/521747/515326/515543/504958/509613/504752/444990/282847/509624/515990/399560/538054/506988/506358/508825/510058/506521/509469/615666/515465/505981/510899/526320/327682/509771/286790/533310/512745/404133/508221/767925/539373/507151/514046/509163/404142/510615/326584/616065/614872/504876/507168/282048/…	116
E30	GO:0043043	peptide biosynthetic process	116/694	423/15517	4.6863e-60	3.59205e-57	3.03623e-57	540610/504831/282220/520875/516473/326581/281138/509764/511189/513481/534882/515226/534165/513793/521747/515326/515543/504958/509613/504752/444990/282847/509624/515990/399560/538054/506988/506358/508825/510058/506521/509469/615666/515465/505981/510899/526320/327682/509771/286790/533310/512745/404133/508221/767925/539373/507151/514046/509163/404142/510615/326584/616065/614872/504876/507168/282048/…	116
E30	GO:0006518	peptide metabolic process	120/694	500/15517	3.24491e-55	1.65524e-52	1.39912e-52	540610/504831/282220/520875/516473/326581/281138/509764/511189/513481/534882/515226/534165/513793/521747/515326/515543/504958/509613/504752/444990/282847/281209/505642/509624/515990/399560/538054/506988/506358/508825/510058/506521/509469/615666/515465/505981/510899/526320/327682/509771/286790/533310/512745/404133/508221/767925/539373/507151/514046/509163/404142/510615/326584/616065/614872/504876/…	120
E30	GO:0043604	amide biosynthetic process	117/694	475/15517	4.31897e-55	1.65524e-52	1.39912e-52	540610/504831/507290/282220/520875/516473/326581/281138/509764/511189/513481/534882/515226/534165/513793/521747/515326/515543/504958/509613/504752/444990/282847/509624/515990/399560/538054/506988/506358/508825/510058/506521/509469/615666/515465/505981/510899/526320/327682/509771/286790/533310/512745/404133/508221/767925/539373/507151/514046/509163/404142/510615/326584/616065/614872/504876/507168/…	117
E30	GO:0009060	aerobic respiration	36/694	98/15517	6.36841e-24	1.95256e-21	1.65042e-21	327675/617230/506492/281640/281090/444878/287012/282199/614700/327688/540225/100300550/281091/512500/510767/535182/281306/338063/327710/282517/338046/327697/327691/338079/287027/287014/282290/286840/281481/509983/616109/281570/616871/287020/613899/286885	36
E30	GO:0006119	oxidative phosphorylation	31/694	73/15517	5.0054e-23	1.26911e-20	1.07273e-20	327675/617230/506492/281640/281090/444878/287012/282199/614700/327688/540225/100300550/281091/512500/510767/338063/327710/282517/338046/327697/327691/287027/287014/282290/281481/616109/281570/616871/287020/613899/286885	31
E30	GO:0006091	generation of precursor metabolites and energy	47/694	185/15517	5.79502e-23	1.26911e-20	1.07273e-20	509566/327675/617230/506492/281640/281090/444878/287012/282199/614700/327688/540225/100300550/281091/512500/510767/281141/280808/535182/281306/338063/327710/282517/338046/327697/327691/338079/287027/287014/282290/508683/404148/514939/507476/616120/512571/286840/281481/509983/513453/281543/616109/281570/616871/287020/613899/286885	47
E30	GO:0045333	cellular respiration	36/694	106/15517	1.45019e-22	2.77893e-20	2.34893e-20	327675/617230/506492/281640/281090/444878/287012/282199/614700/327688/540225/100300550/281091/512500/510767/535182/281306/338063/327710/282517/338046/327697/327691/338079/287027/287014/282290/286840/281481/509983/616109/281570/616871/287020/613899/286885	36
E30	GO:0019646	aerobic electron transport chain	27/694	61/15517	8.40077e-21	1.34042e-18	1.13301e-18	281090/444878/287012/282199/614700/327688/540225/100300550/281091/512500/510767/338063/327710/282517/338046/327697/327691/287027/287014/282290/281481/616109/281570/616871/287020/613899/286885	27
E30	GO:0006457	protein folding	40/694	148/15517	8.74375e-21	1.34042e-18	1.13301e-18	281036/505313/504735/613336/533784/521540/514355/281047/520883/528862/528615/538426/506316/100125317/515580/281832/767874/282646/282254/415113/539835/281831/516099/511913/281833/507165/514610/614288/513277/281373/281803/415110/404138/282848/509914/281418/281419/493638/510494/512043	40
E30	GO:0042775	mitochondrial ATP synthesis coupled electron transport	27/694	62/15517	1.42634e-20	1.98779e-18	1.68021e-18	281090/444878/287012/282199/614700/327688/540225/100300550/281091/512500/510767/338063/327710/282517/338046/327697/327691/287027/287014/282290/281481/616109/281570/616871/287020/613899/286885	27
E30	GO:0042773	ATP synthesis coupled electron transport	27/694	63/15517	2.39243e-20	3.05633e-18	2.58341e-18	281090/444878/287012/282199/614700/327688/540225/100300550/281091/512500/510767/338063/327710/282517/338046/327697/327691/287027/287014/282290/281481/616109/281570/616871/287020/613899/286885	27
E30	GO:0022904	respiratory electron transport chain	28/694	70/15517	4.56371e-20	5.38166e-18	4.54893e-18	281090/444878/287012/282199/614700/327688/540225/100300550/281091/512500/510767/338063/327710/282517/338046/327697/327691/287027/287014/282290/286840/281481/616109/281570/616871/287020/613899/286885	28
E30	GO:0015980	energy derivation by oxidation of organic compounds	36/694	131/15517	4.31293e-19	4.72266e-17	3.99189e-17	327675/617230/506492/281640/281090/444878/287012/282199/614700/327688/540225/100300550/281091/512500/510767/535182/281306/338063/327710/282517/338046/327697/327691/338079/287027/287014/282290/286840/281481/509983/616109/281570/616871/287020/613899/286885	36
E30	GO:0022900	electron transport chain	28/694	77/15517	9.49412e-19	9.70299e-17	8.20159e-17	281090/444878/287012/282199/614700/327688/540225/100300550/281091/512500/510767/338063/327710/282517/338046/327697/327691/287027/287014/282290/286840/281481/616109/281570/616871/287020/613899/286885	28
E30	GO:0009141	nucleoside triphosphate metabolic process	27/694	81/15517	5.25369e-17	5.03369e-15	4.2548e-15	509566/282578/327675/327668/338081/617230/338053/337887/540176/338040/506492/515696/282701/282710/282690/281640/506946/507945/281141/280808/404189/615447/508683/404148/507476/512571/281543	27
E30	GO:0009205	purine ribonucleoside triphosphate metabolic process	25/694	70/15517	1.15728e-16	1.04359e-14	8.8211e-15	509566/282578/327675/327668/338081/617230/338053/337887/540176/338040/506492/515696/282701/282710/282690/281640/281141/280808/404189/615447/508683/404148/507476/512571/281543	25
E30	GO:0046034	ATP metabolic process	23/694	59/15517	2.02383e-16	1.72363e-14	1.45692e-14	509566/282578/327675/327668/338081/617230/338053/337887/540176/338040/506492/515696/282701/282710/282690/281640/281141/280808/508683/404148/507476/512571/281543	23
E30	GO:0009144	purine nucleoside triphosphate metabolic process	25/694	72/15517	2.5139e-16	1.9269e-14	1.62874e-14	509566/282578/327675/327668/338081/617230/338053/337887/540176/338040/506492/515696/282701/282710/282690/281640/281141/280808/404189/615447/508683/404148/507476/512571/281543	25
E30	GO:0009199	ribonucleoside triphosphate metabolic process	25/694	72/15517	2.5139e-16	1.9269e-14	1.62874e-14	509566/282578/327675/327668/338081/617230/338053/337887/540176/338040/506492/515696/282701/282710/282690/281640/281141/280808/404189/615447/508683/404148/507476/512571/281543	25
E30	GO:0051604	protein maturation	45/694	253/15517	1.32449e-15	9.66879e-14	8.17268e-14	281036/505313/504735/613336/533784/521540/514355/281047/520883/512871/528862/528615/538426/506316/100125317/617881/515580/281832/767874/282646/282254/415113/539835/281831/516099/511913/281833/507165/281281/514610/614288/513277/281373/281803/415110/404138/282848/509914/281418/281419/493638/504842/767917/510494/512043	45
E30	GO:0015986	proton motive force-driven ATP synthesis	15/694	25/15517	1.06517e-14	7.42231e-13	6.27381e-13	282578/327675/327668/338081/617230/338053/337887/540176/338040/506492/515696/282701/282710/282690/281640	15
E30	GO:0006754	ATP biosynthetic process	15/694	26/15517	2.41441e-14	1.60926e-12	1.36025e-12	282578/327675/327668/338081/617230/338053/337887/540176/338040/506492/515696/282701/282710/282690/281640	15
E30	GO:0009145	purine nucleoside triphosphate biosynthetic process	17/694	37/15517	6.50594e-14	3.98944e-12	3.37213e-12	282578/327675/327668/338081/617230/338053/337887/540176/338040/506492/515696/282701/282710/282690/281640/404189/615447	17
E30	GO:0009206	purine ribonucleoside triphosphate biosynthetic process	17/694	37/15517	6.50594e-14	3.98944e-12	3.37213e-12	282578/327675/327668/338081/617230/338053/337887/540176/338040/506492/515696/282701/282710/282690/281640/404189/615447	17
E30	GO:0002181	cytoplasmic translation	21/694	61/15517	7.67718e-14	4.52658e-12	3.82616e-12	504831/521747/515543/504958/504752/507151/514046/616065/614872/282048/337890/507270/506768/768327/535056/282884/286868/533285/286853/281898/541216	21
E30	GO:0009142	nucleoside triphosphate biosynthetic process	18/694	44/15517	1.42623e-13	8.0978e-12	6.84478e-12	282578/327675/327668/338081/617230/338053/337887/540176/338040/506492/515696/282701/282710/282690/281640/506946/404189/615447	18
E30	GO:0009201	ribonucleoside triphosphate biosynthetic process	17/694	39/15517	1.91861e-13	1.05044e-11	8.87896e-12	282578/327675/327668/338081/617230/338053/337887/540176/338040/506492/515696/282701/282710/282690/281640/404189/615447	17
E30	GO:0009117	nucleotide metabolic process	41/694	245/15517	2.10158e-13	1.11094e-11	9.39036e-12	509566/519017/282578/327675/327668/338081/617230/338053/337887/540176/338040/506492/515696/282701/282710/282690/281640/280752/506946/507945/281141/280808/327693/281229/509624/535182/404189/615447/404170/511268/508683/404148/514939/507476/616120/512571/781227/513453/281543/507631/515029	41
E30	GO:0006753	nucleoside phosphate metabolic process	42/694	262/15517	4.76394e-13	2.43437e-11	2.05769e-11	509566/519017/282578/327675/327668/338081/617230/338053/337887/540176/338040/506492/515696/282701/282710/282690/281640/280752/613560/506946/507945/281141/280808/327693/281229/509624/535182/404189/615447/404170/511268/508683/404148/514939/507476/616120/512571/781227/513453/281543/507631/515029	42
E30	GO:0022613	ribonucleoprotein complex biogenesis	46/694	310/15517	6.34415e-13	3.13729e-11	2.65183e-11	513878/518321/504752/286811/538548/613634/506358/509598/616675/614028/522309/493638/512824/540457/286790/539373/507168/337890/282688/515534/506768/615300/515238/514966/513128/286868/282050/514569/506297/516063/615178/615638/614220/282877/506229/505507/404140/281898/614553/508788/514932/617823/522621/767931/507833/768063	46
E30	GO:0055086	nucleobase-containing small molecule metabolic process	43/694	303/15517	1.65936e-11	7.94936e-10	6.7193e-10	509566/519017/282578/327675/327668/338081/617230/338053/337887/540176/338040/506492/515696/282701/282710/282690/281640/280752/613560/506946/507945/281141/280808/327693/281229/509624/535182/404189/615447/404170/511268/508683/404148/514939/507476/616120/512571/493724/781227/513453/281543/507631/515029	43
E30	GO:0042254	ribosome biogenesis	36/694	232/15517	5.95077e-11	2.7644e-09	2.33665e-09	513878/518321/286811/538548/506358/509598/616675/614028/522309/540457/286790/539373/507168/337890/282688/515534/506768/515238/514966/513128/286868/282050/514569/506297/516063/615178/615638/614220/282877/506229/505507/404140/281898/767931/507833/768063	36
E30	GO:0006163	purine nucleotide metabolic process	34/694	211/15517	7.15603e-11	3.22653e-09	2.72727e-09	509566/519017/282578/327675/327668/338081/617230/338053/337887/540176/338040/506492/515696/282701/282710/282690/281640/281141/280808/327693/281229/535182/404189/615447/404170/508683/404148/514939/507476/616120/512571/781227/513453/281543	34
E30	GO:0019693	ribose phosphate metabolic process	31/694	189/15517	3.15632e-10	1.38247e-08	1.16855e-08	509566/519017/282578/327675/327668/338081/617230/338053/337887/540176/338040/506492/515696/282701/282710/282690/281640/281141/280808/327693/281229/404189/615447/404170/508683/404148/507476/512571/781227/513453/281543	31
E30	GO:0006120	mitochondrial electron transport, NADH to ubiquinone	9/694	13/15517	4.14217e-10	1.76387e-08	1.49094e-08	338063/327710/282517/338046/327697/327691/287027/287014/282290	9
E30	GO:0009150	purine ribonucleotide metabolic process	29/694	171/15517	5.25805e-10	2.17854e-08	1.84144e-08	509566/519017/282578/327675/327668/338081/617230/338053/337887/540176/338040/506492/515696/282701/282710/282690/281640/281141/280808/327693/281229/404189/615447/404170/508683/404148/507476/512571/281543	29
E30	GO:0022618	ribonucleoprotein complex assembly	25/694	130/15517	5.43756e-10	2.19363e-08	1.85419e-08	504752/286811/613634/506358/493638/512824/286790/507168/282688/615300/515238/286868/282050/514569/516063/615638/614220/282877/506229/281898/614553/508788/514932/617823/522621	25
E30	GO:0072521	purine-containing compound metabolic process	34/694	228/15517	6.04794e-10	2.37731e-08	2.00945e-08	509566/519017/282578/327675/327668/338081/617230/338053/337887/540176/338040/506492/515696/282701/282710/282690/281640/281141/280808/327693/281229/535182/404189/615447/404170/508683/404148/514939/507476/616120/512571/781227/513453/281543	34
E30	GO:0042255	ribosome assembly	16/694	54/15517	9.2944e-10	3.56208e-08	3.0109e-08	518321/286811/506358/286790/507168/282688/515238/286868/282050/514569/516063/615638/614220/282877/506229/281898	16
E30	GO:0071826	ribonucleoprotein complex subunit organization	25/694	135/15517	1.24643e-09	4.66043e-08	3.93929e-08	504752/286811/613634/506358/493638/512824/286790/507168/282688/615300/515238/286868/282050/514569/516063/615638/614220/282877/506229/281898/614553/508788/514932/617823/522621	25
E30	GO:0009259	ribonucleotide metabolic process	29/694	178/15517	1.3893e-09	5.07093e-08	4.28627e-08	509566/519017/282578/327675/327668/338081/617230/338053/337887/540176/338040/506492/515696/282701/282710/282690/281640/281141/280808/327693/281229/404189/615447/404170/508683/404148/507476/512571/281543	29
E30	GO:0009165	nucleotide biosynthetic process	25/694	137/15517	1.71638e-09	6.11911e-08	5.17226e-08	519017/282578/327675/327668/338081/617230/338053/337887/540176/338040/506492/515696/282701/282710/282690/281640/506946/507945/281229/509624/404189/615447/404170/781227/507631	25
E30	GO:1901293	nucleoside phosphate biosynthetic process	25/694	141/15517	3.19286e-09	1.11242e-07	9.4029e-08	519017/282578/327675/327668/338081/617230/338053/337887/540176/338040/506492/515696/282701/282710/282690/281640/506946/507945/281229/509624/404189/615447/404170/781227/507631	25
E30	GO:0009152	purine ribonucleotide biosynthetic process	20/694	94/15517	4.67575e-09	1.59287e-07	1.3464e-07	519017/282578/327675/327668/338081/617230/338053/337887/540176/338040/506492/515696/282701/282710/282690/281640/281229/404189/615447/404170	20
E30	GO:0046390	ribose phosphate biosynthetic process	21/694	106/15517	7.50667e-09	2.50168e-07	2.11458e-07	519017/282578/327675/327668/338081/617230/338053/337887/540176/338040/506492/515696/282701/282710/282690/281640/281229/404189/615447/404170/781227	21
E30	GO:0009260	ribonucleotide biosynthetic process	20/694	100/15517	1.44054e-08	4.69862e-07	3.97157e-07	519017/282578/327675/327668/338081/617230/338053/337887/540176/338040/506492/515696/282701/282710/282690/281640/281229/404189/615447/404170	20
E30	GO:0006164	purine nucleotide biosynthetic process	21/694	115/15517	3.39552e-08	1.08444e-06	9.16641e-07	519017/282578/327675/327668/338081/617230/338053/337887/540176/338040/506492/515696/282701/282710/282690/281640/281229/404189/615447/404170/781227	21
E30	GO:0006122	mitochondrial electron transport, ubiquinol to cytochrome c	8/694	15/15517	7.48843e-08	2.34281e-06	1.98029e-06	512500/510767/616109/281570/616871/287020/613899/286885	8
E30	GO:0072522	purine-containing compound biosynthetic process	21/694	122/15517	9.84545e-08	3.01862e-06	2.55153e-06	519017/282578/327675/327668/338081/617230/338053/337887/540176/338040/506492/515696/282701/282710/282690/281640/281229/404189/615447/404170/781227	21
E30	GO:0051603	proteolysis involved in protein catabolic process	41/694	381/15517	1.78424e-07	5.36321e-06	4.53333e-06	513038/515200/327711/511765/540859/514373/613577/282254/281871/281281/286796/515503/539141/510423/510155/505050/514237/282328/516919/533874/506203/534640/510069/282013/510593/508448/282015/539784/512456/512891/510041/509857/518880/286839/615199/281370/444874/767894/507345/618785/613974	41
E30	GO:0006413	translational initiation	14/694	58/15517	1.83188e-07	5.40051e-06	4.56486e-06	509764/511189/513481/534882/515226/534165/513793/521747/515326/515543/504958/509613/504752/526320	14
E30	GO:0042273	ribosomal large subunit biogenesis	15/694	69/15517	2.94068e-07	8.50577e-06	7.18962e-06	286811/506358/509598/614028/522309/286790/539373/507168/337890/282688/515534/506768/515238/514966/286868	15
E30	GO:0030163	protein catabolic process	42/694	416/15517	7.14394e-07	2.02808e-05	1.71427e-05	513038/515200/327711/511765/540859/514373/613577/282254/281871/281281/286796/506973/515503/539141/510423/510155/505050/514237/282328/516919/533874/506203/534640/510069/282013/510593/508448/282015/539784/512456/512891/510041/509857/518880/286839/615199/281370/444874/767894/507345/618785/613974	42
E30	GO:0000028	ribosomal small subunit assembly	8/694	19/15517	7.49656e-07	2.0895e-05	1.76618e-05	282050/514569/516063/615638/614220/282877/506229/281898	8
E30	GO:0042274	ribosomal small subunit biogenesis	14/694	65/15517	8.23902e-07	2.25543e-05	1.90643e-05	614028/282050/514569/506297/516063/615178/615638/614220/282877/506229/505507/404140/281898/767931	14
E30	GO:0006123	mitochondrial electron transport, cytochrome c to oxygen	10/694	34/15517	1.48301e-06	3.98852e-05	3.37135e-05	281090/444878/287012/282199/614700/327688/540225/100300550/281091/510767	10
E30	GO:0009166	nucleotide catabolic process	12/694	51/15517	1.85554e-06	4.9044e-05	4.14551e-05	509566/280752/507945/281141/280808/327693/508683/404148/507476/512571/281543/515029	12
E30	GO:0006414	translational elongation	9/694	29/15517	3.04048e-06	7.9001e-05	6.67767e-05	282220/520875/516473/326581/281138/444990/327682/533285/286853	9
E30	GO:0019362	pyridine nucleotide metabolic process	12/694	54/15517	3.54434e-06	8.90734e-05	7.52905e-05	509566/281141/280808/535182/508683/404148/514939/507476/616120/512571/513453/281543	12
E30	GO:0046496	nicotinamide nucleotide metabolic process	12/694	54/15517	3.54434e-06	8.90734e-05	7.52905e-05	509566/281141/280808/535182/508683/404148/514939/507476/616120/512571/513453/281543	12
E30	GO:0140694	non-membrane-bounded organelle assembly	22/694	164/15517	3.99968e-06	9.88953e-05	8.35927e-05	518321/615329/286811/282254/614759/613634/507845/506358/286790/507168/282688/515238/286868/282050/514569/516063/615638/614220/282877/506229/281898/533223	22
E30	GO:1901292	nucleoside phosphate catabolic process	13/694	65/15517	4.89341e-06	0.000119073	0.000100648	509566/280752/613560/507945/281141/280808/327693/508683/404148/507476/512571/281543/515029	13
E30	GO:0072524	pyridine-containing compound metabolic process	12/694	56/15517	5.31511e-06	0.000127313	0.000107613	509566/281141/280808/535182/508683/404148/514939/507476/616120/512571/513453/281543	12
E30	GO:0008380	RNA splicing	29/694	265/15517	8.16038e-06	0.00019246	0.000162679	533977/507120/535258/506917/528135/100125318/538662/614759/613634/509920/505417/512824/509771/518045/504506/513083/531931/574400/613304/767873/614553/508788/514932/617823/522621/767931/616210/512680/614551	29
E30	GO:0006096	glycolytic process	8/694	26/15517	1.17244e-05	0.000256765	0.000217034	509566/281141/280808/508683/404148/507476/512571/281543	8
E30	GO:0009137	purine nucleoside diphosphate catabolic process	8/694	26/15517	1.17244e-05	0.000256765	0.000217034	509566/281141/280808/508683/404148/507476/512571/281543	8
E30	GO:0009181	purine ribonucleoside diphosphate catabolic process	8/694	26/15517	1.17244e-05	0.000256765	0.000217034	509566/281141/280808/508683/404148/507476/512571/281543	8
E30	GO:0009191	ribonucleoside diphosphate catabolic process	8/694	26/15517	1.17244e-05	0.000256765	0.000217034	509566/281141/280808/508683/404148/507476/512571/281543	8
E30	GO:0046032	ADP catabolic process	8/694	26/15517	1.17244e-05	0.000256765	0.000217034	509566/281141/280808/508683/404148/507476/512571/281543	8
E30	GO:0009135	purine nucleoside diphosphate metabolic process	8/694	27/15517	1.60117e-05	0.000336245	0.000284216	509566/281141/280808/508683/404148/507476/512571/281543	8
E30	GO:0009179	purine ribonucleoside diphosphate metabolic process	8/694	27/15517	1.60117e-05	0.000336245	0.000284216	509566/281141/280808/508683/404148/507476/512571/281543	8
E30	GO:0046031	ADP metabolic process	8/694	27/15517	1.60117e-05	0.000336245	0.000284216	509566/281141/280808/508683/404148/507476/512571/281543	8
E30	GO:0009185	ribonucleoside diphosphate metabolic process	8/694	28/15517	2.15431e-05	0.000434548	0.000367307	509566/281141/280808/508683/404148/507476/512571/281543	8
E30	GO:0019364	pyridine nucleotide catabolic process	8/694	28/15517	2.15431e-05	0.000434548	0.000367307	509566/281141/280808/508683/404148/507476/512571/281543	8
E30	GO:0042026	protein refolding	8/694	28/15517	2.15431e-05	0.000434548	0.000367307	528862/528615/282254/415113/539835/281831/516099/511913	8
E30	GO:0072526	pyridine-containing compound catabolic process	8/694	29/15517	2.85918e-05	0.000569236	0.000481155	509566/281141/280808/508683/404148/507476/512571/281543	8
E30	GO:0042743	hydrogen peroxide metabolic process	7/694	22/15517	3.28631e-05	0.000637711	0.000539034	281209/512439/539994/281997/286793/281999/282885	7
E30	GO:0042744	hydrogen peroxide catabolic process	7/694	22/15517	3.28631e-05	0.000637711	0.000539034	281209/512439/539994/281997/286793/281999/282885	7
E30	GO:0000375	RNA splicing, via transesterification reactions	24/694	217/15517	4.07536e-05	0.000761893	0.000644001	533977/507120/535258/528135/100125318/538662/614759/613634/509920/512824/509771/504506/531931/574400/613304/767873/614553/508788/514932/617823/522621/767931/512680/614551	24
E30	GO:0000377	RNA splicing, via transesterification reactions with bulged adenosine as nucleophile	24/694	217/15517	4.07536e-05	0.000761893	0.000644001	533977/507120/535258/528135/100125318/538662/614759/613634/509920/512824/509771/504506/531931/574400/613304/767873/614553/508788/514932/617823/522621/767931/512680/614551	24
E30	GO:0000398	mRNA splicing, via spliceosome	24/694	217/15517	4.07536e-05	0.000761893	0.000644001	533977/507120/535258/528135/100125318/538662/614759/613634/509920/512824/509771/504506/531931/574400/613304/767873/614553/508788/514932/617823/522621/767931/512680/614551	24
E30	GO:0009132	nucleoside diphosphate metabolic process	9/694	39/15517	4.3054e-05	0.000776491	0.00065634	509566/506946/281141/280808/508683/404148/507476/512571/281543	9
E30	GO:0009154	purine ribonucleotide catabolic process	9/694	39/15517	4.3054e-05	0.000776491	0.00065634	509566/281141/280808/327693/508683/404148/507476/512571/281543	9
E30	GO:0009261	ribonucleotide catabolic process	9/694	39/15517	4.3054e-05	0.000776491	0.00065634	509566/281141/280808/327693/508683/404148/507476/512571/281543	9
E30	GO:0007015	actin filament organization	24/694	218/15517	4.39081e-05	0.000782687	0.000661577	280989/326600/540838/506596/539459/614345/540092/353121/534553/282196/513267/514407/613548/513895/281440/338049/538559/282385/282386/497015/497019/535277/282024/533223	24
E30	GO:0006979	response to oxidative stress	11/694	59/15517	5.20272e-05	0.000916754	0.000774899	327662/281209/286809/513221/327670/281997/286793/281999/282885/515860/281495	11
E30	GO:0051084	'de novo' post-translational protein folding	7/694	24/15517	6.16709e-05	0.00105957	0.000895614	538426/282254/415113/539835/281831/281833/510494	7
E30	GO:0051085	chaperone cofactor-dependent protein refolding	7/694	24/15517	6.16709e-05	0.00105957	0.000895614	538426/282254/415113/539835/281831/281833/510494	7
E30	GO:0002548	monocyte chemotaxis	8/694	32/15517	6.22055e-05	0.00105957	0.000895614	616723/616732/100140488/281043/282170/281044/407771/786492	8
E30	GO:1901137	carbohydrate derivative biosynthetic process	33/694	359/15517	7.34127e-05	0.00123672	0.00104536	519017/282578/327675/327668/338081/617230/338053/337887/540176/338040/506492/515696/282701/282710/282690/281640/614538/510682/506946/507945/281229/510575/539959/540389/526256/404189/615447/768033/404170/781227/767958/281543/507631	33
E30	GO:0006195	purine nucleotide catabolic process	9/694	43/15517	9.76148e-05	0.00162656	0.00137487	509566/281141/280808/327693/508683/404148/507476/512571/281543	9
E30	GO:0009134	nucleoside diphosphate catabolic process	8/694	34/15517	9.91975e-05	0.00163516	0.00138214	509566/281141/280808/508683/404148/507476/512571/281543	8
E30	GO:0090407	organophosphate biosynthetic process	27/694	274/15517	0.000103884	0.0016942	0.00143205	519017/282578/327675/327668/338081/617230/338053/337887/540176/338040/506492/515696/282701/282710/282690/281640/516210/506946/507945/281229/509624/404189/615447/404170/781227/281543/507631	27
E30	GO:0000027	ribosomal large subunit assembly	7/694	26/15517	0.000108396	0.00173096	0.00146311	286811/506358/286790/507168/282688/515238/286868	7
E30	GO:0006458	'de novo' protein folding	7/694	26/15517	0.000108396	0.00173096	0.00146311	538426/282254/415113/539835/281831/281833/510494	7
E30	GO:0072593	reactive oxygen species metabolic process	9/694	44/15517	0.000117905	0.00186339	0.00157505	281111/281209/512439/539994/281997/286793/281999/282885/281495	9
E30	GO:0097529	myeloid leukocyte migration	11/694	67/15517	0.000172636	0.00270052	0.00228266	327662/616723/616732/100140488/281043/282170/281044/407771/509230/282226/786492	11
E30	GO:0070972	protein localization to endoplasmic reticulum	8/694	37/15517	0.000187333	0.00290083	0.00245196	533949/618184/531676/615778/767917/512792/767980/613974	8
E30	GO:0097530	granulocyte migration	10/694	57/15517	0.000192656	0.00295342	0.00249642	327662/616723/616732/100140488/281043/282170/281044/509230/282226/786492	10
E30	GO:0046434	organophosphate catabolic process	13/694	91/15517	0.000196286	0.00297928	0.00251827	509566/280752/613560/507945/281141/280808/327693/508683/404148/507476/512571/281543/515029	13
E30	GO:0071674	mononuclear cell migration	9/694	47/15517	0.000201029	0.00302134	0.00255383	616723/616732/100140488/281043/282170/281044/407771/509230/786492	9
E30	GO:0007005	mitochondrion organization	21/694	197/15517	0.000203751	0.00303252	0.00256328	510373/614033/539832/768048/100295800/327688/540225/615565/327715/282531/511913/540962/326346/338057/338079/287027/530409/515363/512377/338045/100607974	21
E30	GO:0006090	pyruvate metabolic process	8/694	38/15517	0.000228096	0.00336222	0.00284196	509566/281141/280808/508683/404148/507476/512571/281543	8
E30	GO:0019439	aromatic compound catabolic process	23/694	228/15517	0.000235259	0.00340611	0.00287906	508324/509566/280752/282218/613560/507945/281141/280808/327693/513221/613634/509920/508683/404148/507476/512571/767836/526320/618084/512830/505618/281543/515029	23
E30	GO:0016052	carbohydrate catabolic process	9/694	48/15517	0.000237739	0.00340611	0.00287906	509566/281141/280808/508683/404148/514939/507476/512571/281543	9
E30	GO:0072523	purine-containing compound catabolic process	9/694	48/15517	0.000237739	0.00340611	0.00287906	509566/281141/280808/327693/508683/404148/507476/512571/281543	9
E30	GO:0008154	actin polymerization or depolymerization	13/694	93/15517	0.000244841	0.00347538	0.00293761	540838/506596/539459/614345/540092/353121/534553/513267/513895/282385/282386/282024/533223	13
E30	GO:0045454	cell redox homeostasis	5/694	14/15517	0.000252028	0.00354458	0.0029961	281997/286793/281999/282885/282438	5
E30	GO:0009123	nucleoside monophosphate metabolic process	7/694	30/15517	0.000287007	0.00399984	0.00338092	519017/613560/507945/281229/404170/781227/507631	7
E30	GO:1990266	neutrophil migration	9/694	50/15517	0.000327928	0.00452896	0.00382816	616723/616732/100140488/281043/282170/281044/509230/282226/786492	9
E30	GO:0000302	response to reactive oxygen species	5/694	15/15517	0.000364185	0.00498478	0.00421345	327662/281209/281997/286793/281495	5
E30	GO:0006364	rRNA processing	17/694	151/15517	0.000424974	0.00576535	0.00487324	513878/286811/538548/509598/616675/522309/515534/514966/282050/506297/615178/282877/505507/404140/767931/507833/768063	17
E30	GO:1901361	organic cyclic compound catabolic process	23/694	238/15517	0.000436466	0.00586932	0.00496112	508324/509566/280752/282218/613560/507945/281141/280808/327693/513221/613634/509920/508683/404148/507476/512571/767836/526320/618084/512830/505618/281543/515029	23
E30	GO:1990542	mitochondrial transmembrane transport	10/694	64/15517	0.000510031	0.00679894	0.0057469	515580/511913/616718/282477/282479/282480/506149/540765/781575/281562	10
E30	GO:0071621	granulocyte chemotaxis	9/694	53/15517	0.000514705	0.00680209	0.00574956	327662/616723/616732/100140488/281043/282170/281044/282226/786492	9
E30	GO:0009266	response to temperature stimulus	6/694	24/15517	0.000527777	0.00691524	0.0058452	528862/528615/281832/767874/516099/281562	6
E30	GO:0032543	mitochondrial translation	7/694	33/15517	0.000535918	0.00696239	0.00588506	540610/538054/508825/509469/615666/515465/510899	7
E30	GO:0030029	actin filament-based process	29/694	336/15517	0.000561998	0.00723986	0.00611959	505914/524770/280989/327662/326600/540838/506596/539459/614345/540092/353121/534553/282196/615329/513267/504795/514407/613548/513895/281440/338049/538559/282385/282386/497015/497019/535277/282024/533223	29
E30	GO:0097435	supramolecular fiber organization	29/694	337/15517	0.000589546	0.00753146	0.00636607	280989/326600/540838/506596/539459/614345/540092/353121/534553/282196/615329/513267/514407/613548/513895/281440/338049/538559/510850/616317/282385/282386/497015/497019/535277/614988/282024/280955/533223	29
E30	GO:0034655	nucleobase-containing compound catabolic process	20/694	199/15517	0.000615554	0.00779872	0.00659197	509566/280752/282218/613560/507945/281141/280808/327693/613634/509920/508683/404148/507476/512571/767836/526320/512830/505618/281543/515029	20
E30	GO:0030036	actin cytoskeleton organization	28/694	323/15517	0.000649136	0.00815677	0.00689462	524770/280989/327662/326600/540838/506596/539459/614345/540092/353121/534553/282196/615329/513267/504795/514407/613548/513895/281440/338049/538559/282385/282386/497015/497019/535277/282024/533223	28
E30	GO:0034314	Arp2/3 complex-mediated actin nucleation	6/694	25/15517	0.000668433	0.00833095	0.00704185	326600/540838/506596/539459/614345/514407	6
E30	GO:0061077	chaperone-mediated protein folding	7/694	35/15517	0.000780527	0.00957239	0.00809119	538426/282254/415113/539835/281831/281833/510494	7
E30	GO:0070555	response to interleukin-1	7/694	35/15517	0.000780527	0.00957239	0.00809119	327662/616723/616732/100140488/281043/282170/281044	7
E30	GO:1901136	carbohydrate derivative catabolic process	14/694	118/15517	0.00079278	0.00964549	0.00815299	509566/521401/507945/281141/522919/280808/515687/327693/508683/404148/507476/512571/281543/515029	14
E30	GO:0030595	leukocyte chemotaxis	10/694	68/15517	0.000833909	0.00993149	0.00839473	327662/616723/616732/100140488/281043/282170/281044/407771/282226/786492	10
E30	GO:0022411	cellular component disassembly	16/694	146/15517	0.000834028	0.00993149	0.00839473	353121/534553/282218/513267/444990/615565/327715/282531/515465/327682/338045/616317/787696/282024/507345/533223	16
E30	GO:0009124	nucleoside monophosphate biosynthetic process	6/694	26/15517	0.000836444	0.00993149	0.00839473	519017/507945/281229/404170/781227/507631	6
E30	GO:0044270	cellular nitrogen compound catabolic process	21/694	219/15517	0.0008422	0.00993149	0.00839473	509566/280752/282218/613560/507945/281141/280808/327693/513221/613634/509920/508683/404148/507476/512571/767836/526320/512830/505618/281543/515029	21
E30	GO:0030593	neutrophil chemotaxis	8/694	46/15517	0.000887969	0.0103716	0.00876671	616723/616732/100140488/281043/282170/281044/282226/786492	8
E30	GO:0046700	heterocycle catabolic process	21/694	220/15517	0.000893051	0.0103716	0.00876671	509566/280752/282218/613560/507945/281141/280808/327693/513221/613634/509920/508683/404148/507476/512571/767836/526320/512830/505618/281543/515029	21
E30	GO:0072676	lymphocyte migration	7/694	36/15517	0.00093206	0.0107432	0.00908085	616723/616732/100140488/281043/282170/281044/509230	7
E30	GO:0016072	rRNA metabolic process	17/694	162/15517	0.000951541	0.0108859	0.00920147	513878/286811/538548/509598/616675/522309/515534/514966/282050/506297/615178/282877/505507/404140/767931/507833/768063	17
E30	GO:0048247	lymphocyte chemotaxis	6/694	27/15517	0.00103522	0.011669	0.00986342	616723/616732/100140488/281043/282170/281044	6
E30	GO:0071346	cellular response to interferon-gamma	6/694	27/15517	0.00103522	0.011669	0.00986342	616723/616732/100140488/281043/282170/281044	6
E30	GO:0060326	cell chemotaxis	12/694	95/15517	0.00105968	0.0118576	0.0100228	327662/616723/616732/100140488/281043/282170/281044/407771/286836/281743/282226/786492	12
E30	GO:0034620	cellular response to unfolded protein	7/694	37/15517	0.00110583	0.0122843	0.0103835	613577/282254/415113/539835/281831/511913/616210	7
E30	GO:0009408	response to heat	5/694	19/15517	0.00121503	0.0133046	0.0112459	528862/528615/281832/767874/516099	5
E30	GO:0050821	protein stabilization	5/694	19/15517	0.00121503	0.0133046	0.0112459	782633/520883/281832/767874/100138230	5
E30	GO:0015031	protein transport	34/694	441/15517	0.00145045	0.0157698	0.0133297	327662/768053/536553/338058/510994/533949/281052/523847/281078/613357/515580/511913/513592/614921/617245/514541/540457/505941/506986/615778/511816/514423/614073/514852/540765/508729/618580/504456/781575/510780/538501/507345/618785/513840	34
E30	GO:0006986	response to unfolded protein	7/694	39/15517	0.00152894	0.0165061	0.013952	613577/282254/415113/539835/281831/511913/616210	7
E30	GO:0034599	cellular response to oxidative stress	5/694	20/15517	0.001561	0.0166236	0.0140513	327662/281997/286793/282885/281495	5
E30	GO:0009615	response to virus	8/694	50/15517	0.00156151	0.0166236	0.0140513	508378/514373/515091/353510/280872/280873/347699/654488	8
E30	GO:0140053	mitochondrial gene expression	8/694	51/15517	0.00178083	0.0188277	0.0159144	540610/399560/538054/508825/509469/615666/515465/510899	8
E30	GO:0045010	actin nucleation	6/694	30/15517	0.00185265	0.0194528	0.0164428	326600/540838/506596/539459/614345/514407	6
E30	GO:0006397	mRNA processing	25/694	298/15517	0.00194542	0.020288	0.0171487	533977/507120/535258/528135/100125318/538662/614759/613634/509920/512824/509771/504506/531931/574400/444868/613304/767873/614553/508788/514932/617823/522621/767931/512680/614551	25
E30	GO:0006221	pyrimidine nucleotide biosynthetic process	5/694	21/15517	0.00197424	0.0203121	0.0171691	506946/507945/404189/615447/507631	5
E30	GO:0062197	cellular response to chemical stress	5/694	21/15517	0.00197424	0.0203121	0.0171691	327662/281997/286793/282885/281495	5
E30	GO:0050900	leukocyte migration	11/694	89/15517	0.00201826	0.0205912	0.017405	327662/616723/616732/100140488/281043/282170/281044/407771/509230/282226/786492	11
E30	GO:0051014	actin filament severing	4/694	13/15517	0.00205199	0.0205912	0.017405	353121/534553/513267/514407	4
E30	GO:0098754	detoxification	4/694	13/15517	0.00205199	0.0205912	0.017405	281997/286793/282438/281495	4
E30	GO:1902600	proton transmembrane transport	9/694	64/15517	0.00206713	0.0205912	0.017405	282578/327675/338053/337887/540176/287017/282405/281641/338079	9
E30	GO:0034341	response to interferon-gamma	7/694	41/15517	0.00206852	0.0205912	0.017405	616723/616732/100140488/281043/282170/281044/353510	7
E30	GO:0006915	apoptotic process	29/694	366/15517	0.00210914	0.02086	0.0176322	509685/327662/782633/510373/574093/282218/511765/493720/615565/613577/511913/100138230/507138/512913/617420/516090/786492/615447/613842/510586/540135/786336/613777/282846/326588/616210/510652/787696/509740	29
E30	GO:0034976	response to endoplasmic reticulum stress	8/694	53/15517	0.00229205	0.0225238	0.0190386	613577/415113/281373/281803/415110/613927/514688/507345	8
E30	GO:0035967	cellular response to topologically incorrect protein	7/694	42/15517	0.0023882	0.0231715	0.0195861	613577/282254/415113/539835/281831/511913/616210	7
E30	GO:2001233	regulation of apoptotic signaling pathway	7/694	42/15517	0.0023882	0.0231715	0.0195861	510373/613577/512913/786492/510586/326588/616210	7
E30	GO:0032970	regulation of actin filament-based process	13/694	119/15517	0.00255242	0.0246092	0.0208013	505914/506596/614345/540092/353121/514407/513895/281440/538559/282385/282386/282024/533223	13
E30	GO:0071347	cellular response to interleukin-1	6/694	32/15517	0.0026208	0.0251106	0.0212251	616723/616732/100140488/281043/282170/281044	6
E30	GO:0006839	mitochondrial transport	10/694	79/15517	0.00266223	0.0253491	0.0214267	515580/511913/616718/282477/282479/282480/506149/540765/781575/281562	10
E30	GO:0009147	pyrimidine nucleoside triphosphate metabolic process	4/694	14/15517	0.00277198	0.0260702	0.0220362	506946/507945/404189/615447	4
E30	GO:0009636	response to toxic substance	4/694	14/15517	0.00277198	0.0260702	0.0220362	281997/286793/282438/281495	4
E30	GO:0033108	mitochondrial respiratory chain complex assembly	8/694	55/15517	0.00291177	0.027218	0.0230064	539832/768048/100295800/326346/338057/338079/287027/100607974	8
E30	GO:0006220	pyrimidine nucleotide metabolic process	5/694	23/15517	0.00303166	0.0279972	0.023665	506946/507945/404189/615447/507631	5
E30	GO:0031647	regulation of protein stability	5/694	23/15517	0.00303166	0.0279972	0.023665	782633/520883/281832/767874/100138230	5
E30	GO:0000387	spliceosomal snRNP assembly	6/694	33/15517	0.00308411	0.028311	0.0239303	613634/614553/508788/514932/617823/522621	6
E30	GO:0035966	response to topologically incorrect protein	7/694	44/15517	0.0031404	0.0286561	0.024222	613577/282254/415113/539835/281831/511913/616210	7
E30	GO:0012501	programmed cell death	29/694	377/15517	0.00324503	0.0294357	0.0248809	509685/327662/782633/510373/574093/282218/511765/493720/615565/613577/511913/100138230/507138/512913/617420/516090/786492/615447/613842/510586/540135/786336/613777/282846/326588/616210/510652/787696/509740	29
E30	GO:0008219	cell death	29/694	378/15517	0.00337019	0.0303912	0.0256886	509685/327662/782633/510373/574093/282218/511765/493720/615565/613577/511913/100138230/507138/512913/617420/516090/786492/615447/613842/510586/540135/786336/613777/282846/326588/616210/510652/787696/509740	29
E30	GO:0032507	maintenance of protein location in cell	5/694	24/15517	0.00369058	0.0328934	0.0278036	618184/531676/282385/282386/282024	5
E30	GO:0072528	pyrimidine-containing compound biosynthetic process	5/694	24/15517	0.00369058	0.0328934	0.0278036	506946/507945/404189/615447/507631	5
E30	GO:0000470	maturation of LSU-rRNA	5/694	25/15517	0.00444612	0.0391718	0.0331105	286811/509598/522309/515534/514966	5
E30	GO:0006099	tricarboxylic acid cycle	5/694	25/15517	0.00444612	0.0391718	0.0331105	535182/281306/286840/281481/509983	5
E30	GO:0051607	defense response to virus	7/694	47/15517	0.00459189	0.040225	0.0340007	514373/515091/353510/280872/280873/347699/654488	7
E30	GO:0008064	regulation of actin polymerization or depolymerization	9/694	72/15517	0.00465828	0.0403454	0.0341025	506596/614345/540092/353121/513895/282385/282386/282024/533223	9
E30	GO:0030832	regulation of actin filament length	9/694	72/15517	0.00465828	0.0403454	0.0341025	506596/614345/540092/353121/513895/282385/282386/282024/533223	9
E30	GO:0002183	cytoplasmic translational initiation	4/694	16/15517	0.00469328	0.0404202	0.0341657	521747/515543/504958/504752	4
E30	GO:0045047	protein targeting to ER	5/694	26/15517	0.00530556	0.0451857	0.0381938	615778/767917/512792/767980/613974	5
E30	GO:0072599	establishment of protein localization to endoplasmic reticulum	5/694	26/15517	0.00530556	0.0451857	0.0381938	615778/767917/512792/767980/613974	5
E30	GO:0072527	pyrimidine-containing compound metabolic process	6/694	37/15517	0.00556528	0.0470941	0.0398069	506946/507945/404189/615447/507631/515029	6
E30	GO:0006417	regulation of translation	9/694	74/15517	0.00559108	0.0470941	0.0398069	504831/515326/509613/444990/526320/509771/767925/533892/338071	9
E30	GO:0032956	regulation of actin cytoskeleton organization	12/694	116/15517	0.0057106	0.047838	0.0404357	506596/614345/540092/353121/514407/513895/281440/538559/282385/282386/282024/533223	12
E50	GO:0043043	peptide biosynthetic process	102/530	423/15517	1.75994e-58	2.44456e-55	2.21012e-55	504831/282220/520875/516473/326581/281138/509764/511189/512350/534165/513793/515326/515543/504958/286819/504752/444990/541077/282847/512468/509624/515990/510058/506521/615431/526320/327682/509771/286790/533310/512745/404133/508221/767925/539373/507151/514046/509163/404142/510615/326584/616065/614872/504876/507168/282048/337890/404137/404190/618702/507270/282688/615556/505603/515534/506768/768327/…	102
E50	GO:0006412	translation	101/530	417/15517	4.35768e-58	3.02641e-55	2.73616e-55	504831/282220/520875/516473/326581/281138/509764/511189/512350/534165/513793/515326/515543/504958/286819/504752/444990/541077/282847/509624/515990/510058/506521/615431/526320/327682/509771/286790/533310/512745/404133/508221/767925/539373/507151/514046/509163/404142/510615/326584/616065/614872/504876/507168/282048/337890/404137/404190/618702/507270/282688/615556/505603/515534/506768/768327/508165/…	101
E50	GO:0006518	peptide metabolic process	105/530	500/15517	6.32708e-54	2.92944e-51	2.64849e-51	504831/282220/520875/516473/326581/281138/509764/511189/512350/534165/513793/515326/515543/504958/286819/504752/444990/541077/282847/512468/281209/517724/509624/515990/510058/506521/615431/526320/327682/509771/286790/533310/512745/404133/508221/767925/539373/507151/514046/509163/404142/510615/326584/616065/614872/504876/507168/282048/337890/404137/404190/618702/507270/282688/615556/505603/515534/…	105
E50	GO:0043604	amide biosynthetic process	102/530	475/15517	2.64734e-53	9.19289e-51	8.31126e-51	504831/282220/520875/516473/326581/281138/509764/511189/512350/534165/513793/515326/515543/504958/286819/504752/444990/541077/282847/512468/509624/515990/510058/506521/615431/526320/327682/509771/286790/533310/512745/404133/508221/767925/539373/507151/514046/509163/404142/510615/326584/616065/614872/504876/507168/282048/337890/404137/404190/618702/507270/282688/615556/505603/515534/506768/768327/…	102
E50	GO:0002181	cytoplasmic translation	22/530	61/15517	2.27187e-17	6.31124e-15	5.70597e-15	504831/512350/515543/504958/286819/504752/541077/507151/514046/616065/614872/282048/337890/507270/506768/768327/535056/282884/286868/533285/286853/281898	22
E50	GO:0006457	protein folding	30/530	148/15517	2.17303e-15	5.03056e-13	4.54811e-13	281036/505313/613336/281719/528862/528615/538426/282215/514361/281832/767874/282646/282254/415113/539835/281831/517535/516099/511913/281833/507165/513277/281373/281803/404138/282848/281418/281419/493638/510494	30
E50	GO:0015986	proton motive force-driven ATP synthesis	14/530	25/15517	7.83935e-15	1.55555e-12	1.40637e-12	282578/327675/327668/338081/617230/338053/337887/540176/506492/515696/282701/282710/282690/281640	14
E50	GO:0006754	ATP biosynthetic process	14/530	26/15517	1.64581e-14	2.85754e-12	2.58349e-12	282578/327675/327668/338081/617230/338053/337887/540176/506492/515696/282701/282710/282690/281640	14
E50	GO:0006119	oxidative phosphorylation	20/530	73/15517	2.61606e-13	4.03745e-11	3.65024e-11	327675/617230/506492/281640/281090/444878/287012/282199/614700/327688/540225/281091/338063/282517/287027/281481/616109/281570/287020/613899	20
E50	GO:0009145	purine nucleoside triphosphate biosynthetic process	15/530	37/15517	3.86821e-13	4.88449e-11	4.41605e-11	282578/327675/327668/338081/617230/338053/337887/540176/506492/515696/282701/282710/282690/281640/615447	15
E50	GO:0009206	purine ribonucleoside triphosphate biosynthetic process	15/530	37/15517	3.86821e-13	4.88449e-11	4.41605e-11	282578/327675/327668/338081/617230/338053/337887/540176/506492/515696/282701/282710/282690/281640/615447	15
E50	GO:0009201	ribonucleoside triphosphate biosynthetic process	15/530	39/15517	9.74946e-13	1.1285e-10	1.02027e-10	282578/327675/327668/338081/617230/338053/337887/540176/506492/515696/282701/282710/282690/281640/615447	15
E50	GO:0045333	cellular respiration	22/530	106/15517	7.53169e-12	7.55369e-10	6.82926e-10	327675/617230/506492/281640/514221/281090/444878/287012/282199/614700/327688/540225/281091/281306/338063/282517/287027/281481/616109/281570/287020/613899	22
E50	GO:0009142	nucleoside triphosphate biosynthetic process	15/530	44/15517	7.61351e-12	7.55369e-10	6.82926e-10	282578/327675/327668/338081/617230/338053/337887/540176/506492/515696/282701/282710/282690/281640/615447	15
E50	GO:0009060	aerobic respiration	21/530	98/15517	1.18472e-11	1.09705e-09	9.91837e-10	327675/617230/506492/281640/281090/444878/287012/282199/614700/327688/540225/281091/281306/338063/282517/287027/281481/616109/281570/287020/613899	21
E50	GO:0022613	ribonucleoprotein complex biogenesis	37/530	310/15517	3.26719e-11	2.83633e-09	2.56431e-09	513878/518321/512350/504752/614028/522309/493638/540457/286790/539373/507168/337890/282688/515534/506768/615300/515238/514966/513128/286868/282050/514569/506297/516063/615178/615638/282877/506229/505507/404140/281898/614553/508788/514932/617823/507828/614984	37
E50	GO:0019646	aerobic electron transport chain	16/530	61/15517	1.34205e-10	1.09653e-08	9.91372e-09	281090/444878/287012/282199/614700/327688/540225/281091/338063/282517/287027/281481/616109/281570/287020/613899	16
E50	GO:0051604	protein maturation	32/530	253/15517	1.62288e-10	1.25232e-08	1.13222e-08	281036/505313/613336/281719/528862/528615/538426/282215/514361/617881/281832/767874/282646/282254/415113/539835/281831/517535/516099/511913/281833/507165/513277/281373/281803/404138/282848/281418/281419/493638/767917/510494	32
E50	GO:0042775	mitochondrial ATP synthesis coupled electron transport	16/530	62/15517	1.75255e-10	1.28121e-08	1.15833e-08	281090/444878/287012/282199/614700/327688/540225/281091/338063/282517/287027/281481/616109/281570/287020/613899	16
E50	GO:0042773	ATP synthesis coupled electron transport	16/530	63/15517	2.27605e-10	1.58072e-08	1.42912e-08	281090/444878/287012/282199/614700/327688/540225/281091/338063/282517/287027/281481/616109/281570/287020/613899	16
E50	GO:0015980	energy derivation by oxidation of organic compounds	22/530	131/15517	5.76475e-10	3.81297e-08	3.44729e-08	327675/617230/506492/281640/514221/281090/444878/287012/282199/614700/327688/540225/281091/281306/338063/282517/287027/281481/616109/281570/287020/613899	22
E50	GO:0042026	protein refolding	11/530	28/15517	8.44263e-10	5.33037e-08	4.81917e-08	281719/528862/528615/282215/282254/415113/539835/281831/517535/516099/511913	11
E50	GO:0022904	respiratory electron transport chain	16/530	70/15517	1.23484e-09	7.45738e-08	6.74219e-08	281090/444878/287012/282199/614700/327688/540225/281091/338063/282517/287027/281481/616109/281570/287020/613899	16
E50	GO:0022618	ribonucleoprotein complex assembly	21/530	130/15517	2.95288e-09	1.70898e-07	1.54508e-07	512350/504752/493638/286790/507168/282688/615300/515238/286868/282050/514569/516063/615638/282877/506229/281898/614553/508788/514932/617823/507828	21
E50	GO:0022900	electron transport chain	16/530	77/15517	5.45631e-09	3.03153e-07	2.74079e-07	281090/444878/287012/282199/614700/327688/540225/281091/338063/282517/287027/281481/616109/281570/287020/613899	16
E50	GO:0071826	ribonucleoprotein complex subunit organization	21/530	135/15517	5.94874e-09	3.178e-07	2.87322e-07	512350/504752/493638/286790/507168/282688/615300/515238/286868/282050/514569/516063/615638/282877/506229/281898/614553/508788/514932/617823/507828	21
E50	GO:0042254	ribosome biogenesis	28/530	232/15517	6.65192e-09	3.42204e-07	3.09385e-07	513878/518321/614028/522309/540457/286790/539373/507168/337890/282688/515534/506768/515238/514966/513128/286868/282050/514569/506297/516063/615178/615638/282877/506229/505507/404140/281898/614984	28
E50	GO:0046034	ATP metabolic process	14/530	59/15517	8.02065e-09	3.97882e-07	3.59723e-07	282578/327675/327668/338081/617230/338053/337887/540176/506492/515696/282701/282710/282690/281640	14
E50	GO:0009205	purine ribonucleoside triphosphate metabolic process	15/530	70/15517	1.05224e-08	5.03987e-07	4.55653e-07	282578/327675/327668/338081/617230/338053/337887/540176/506492/515696/282701/282710/282690/281640/615447	15
E50	GO:0009141	nucleoside triphosphate metabolic process	16/530	81/15517	1.18172e-08	5.47137e-07	4.94665e-07	282578/327675/327668/338081/617230/338053/337887/540176/506492/515696/282701/282710/282690/281640/507945/615447	16
E50	GO:0009144	purine nucleoside triphosphate metabolic process	15/530	72/15517	1.58228e-08	6.86807e-07	6.2094e-07	282578/327675/327668/338081/617230/338053/337887/540176/506492/515696/282701/282710/282690/281640/615447	15
E50	GO:0009199	ribonucleoside triphosphate metabolic process	15/530	72/15517	1.58228e-08	6.86807e-07	6.2094e-07	282578/327675/327668/338081/617230/338053/337887/540176/506492/515696/282701/282710/282690/281640/615447	15
E50	GO:0042255	ribosome assembly	13/530	54/15517	2.28384e-08	9.61291e-07	8.69099e-07	518321/286790/507168/282688/515238/286868/282050/514569/516063/615638/282877/506229/281898	13
E50	GO:0042274	ribosomal small subunit biogenesis	13/530	65/15517	2.39904e-07	9.80077e-06	8.86084e-06	614028/282050/514569/506297/516063/615178/615638/282877/506229/505507/404140/281898/614984	13
E50	GO:0006414	translational elongation	9/530	29/15517	3.21528e-07	1.27601e-05	1.15363e-05	282220/520875/516473/326581/281138/444990/327682/533285/286853	9
E50	GO:0006091	generation of precursor metabolites and energy	22/530	185/15517	3.6279e-07	1.39976e-05	1.26552e-05	327675/617230/506492/281640/514221/281090/444878/287012/282199/614700/327688/540225/281091/281306/338063/282517/287027/281481/616109/281570/287020/613899	22
E50	GO:0006979	response to oxidative stress	12/530	59/15517	5.7643e-07	2.1552e-05	1.94851e-05	327662/531682/281209/281210/286809/513221/281997/286793/282022/515860/281495/512927	12
E50	GO:0046390	ribose phosphate biosynthetic process	16/530	106/15517	5.89616e-07	2.1552e-05	1.94851e-05	282578/327675/327668/338081/617230/338053/337887/540176/506492/515696/282701/282710/282690/281640/615447/537688	16
E50	GO:0009152	purine ribonucleotide biosynthetic process	15/530	94/15517	6.37045e-07	2.26886e-05	2.05127e-05	282578/327675/327668/338081/617230/338053/337887/540176/506492/515696/282701/282710/282690/281640/615447	15
E50	GO:0051084	'de novo' post-translational protein folding	8/530	24/15517	7.97109e-07	2.70045e-05	2.44147e-05	538426/282254/415113/539835/281831/517535/281833/510494	8
E50	GO:0051085	chaperone cofactor-dependent protein refolding	8/530	24/15517	7.97109e-07	2.70045e-05	2.44147e-05	538426/282254/415113/539835/281831/517535/281833/510494	8
E50	GO:0009165	nucleotide biosynthetic process	18/530	137/15517	9.73373e-07	3.21909e-05	2.91036e-05	282578/327675/327668/338081/617230/338053/337887/540176/506492/515696/282701/282710/282690/281640/507945/509624/615447/537688	18
E50	GO:0009260	ribonucleotide biosynthetic process	15/530	100/15517	1.43805e-06	4.64524e-05	4.19974e-05	282578/327675/327668/338081/617230/338053/337887/540176/506492/515696/282701/282710/282690/281640/615447	15
E50	GO:1901293	nucleoside phosphate biosynthetic process	18/530	141/15517	1.49068e-06	4.7058e-05	4.2545e-05	282578/327675/327668/338081/617230/338053/337887/540176/506492/515696/282701/282710/282690/281640/507945/509624/615447/537688	18
E50	GO:0006458	'de novo' protein folding	8/530	26/15517	1.59396e-06	4.92003e-05	4.44818e-05	538426/282254/415113/539835/281831/517535/281833/510494	8
E50	GO:0006164	purine nucleotide biosynthetic process	16/530	115/15517	1.80415e-06	5.43019e-05	4.90941e-05	282578/327675/327668/338081/617230/338053/337887/540176/506492/515696/282701/282710/282690/281640/615447/537688	16
E50	GO:0000028	ribosomal small subunit assembly	7/530	19/15517	1.83743e-06	5.43019e-05	4.90941e-05	282050/514569/516063/615638/282877/506229/281898	7
E50	GO:0061077	chaperone-mediated protein folding	9/530	35/15517	1.88762e-06	5.46231e-05	4.93846e-05	538426/282215/282254/415113/539835/281831/517535/281833/510494	9
E50	GO:0042273	ribosomal large subunit biogenesis	12/530	69/15517	3.32654e-06	9.42973e-05	8.52539e-05	614028/522309/286790/539373/507168/337890/282688/515534/506768/515238/514966/286868	12
E50	GO:0006413	translational initiation	11/530	58/15517	3.53368e-06	9.81657e-05	8.87513e-05	509764/511189/512350/534165/513793/515326/515543/504958/286819/504752/526320	11
E50	GO:0072522	purine-containing compound biosynthetic process	16/530	122/15517	3.97864e-06	0.000108359	9.79673e-05	282578/327675/327668/338081/617230/338053/337887/540176/506492/515696/282701/282710/282690/281640/615447/537688	16
E50	GO:0042743	hydrogen peroxide metabolic process	7/530	22/15517	5.68757e-06	0.000149057	0.000134762	531682/281209/281210/512439/511735/281997/286793	7
E50	GO:0042744	hydrogen peroxide catabolic process	7/530	22/15517	5.68757e-06	0.000149057	0.000134762	531682/281209/281210/512439/511735/281997/286793	7
E50	GO:0000302	response to reactive oxygen species	6/530	15/15517	5.93902e-06	0.000152765	0.000138114	327662/531682/281209/281997/286793/281495	6
E50	GO:0006123	mitochondrial electron transport, cytochrome c to oxygen	8/530	34/15517	1.45552e-05	0.000367584	0.000332332	281090/444878/287012/282199/614700/327688/540225/281091	8
E50	GO:0009408	response to heat	6/530	19/15517	2.8646e-05	0.000710523	0.000642381	281719/528862/528615/281832/767874/516099	6
E50	GO:1902600	proton transmembrane transport	10/530	64/15517	5.72191e-05	0.00139434	0.00126062	282578/327675/338053/337887/540176/287017/282405/281641/613925/535743	10
E50	GO:0090407	organophosphate biosynthetic process	23/530	274/15517	6.9371e-05	0.00166132	0.00150199	282578/327675/327668/338081/617230/338053/337887/540176/506492/515696/282701/282710/282690/281640/514865/516210/507945/407767/540877/509624/515361/615447/537688	23
E50	GO:0035967	cellular response to topologically incorrect protein	8/530	42/15517	7.44019e-05	0.0017516	0.00158361	613577/282254/415113/539835/281831/517535/511913/540246	8
E50	GO:0035966	response to topologically incorrect protein	8/530	44/15517	0.000105217	0.00239585	0.00216608	613577/282254/415113/539835/281831/517535/511913/540246	8
E50	GO:0072593	reactive oxygen species metabolic process	8/530	44/15517	0.000105217	0.00239585	0.00216608	531682/281209/281210/512439/511735/281997/286793/281495	8
E50	GO:0009266	response to temperature stimulus	6/530	24/15517	0.000122852	0.00271813	0.00245745	281719/528862/528615/281832/767874/516099	6
E50	GO:0097530	granulocyte migration	9/530	57/15517	0.000123284	0.00271813	0.00245745	327662/616732/281043/282170/414347/281044/509230/282226/786492	9
E50	GO:0002183	cytoplasmic translational initiation	5/530	16/15517	0.000145733	0.00316287	0.00285954	512350/515543/504958/286819/504752	5
E50	GO:0034620	cellular response to unfolded protein	7/530	37/15517	0.0002201	0.00470337	0.0042523	613577/282254/415113/539835/281831/517535/511913	7
E50	GO:0009150	purine ribonucleotide metabolic process	16/530	171/15517	0.000257401	0.00541712	0.00489759	282578/327675/327668/338081/617230/338053/337887/540176/506492/515696/282701/282710/282690/281640/407767/615447	16
E50	GO:1990266	neutrophil migration	8/530	50/15517	0.000266323	0.00546528	0.00494114	616732/281043/282170/414347/281044/509230/282226/786492	8
E50	GO:0019693	ribose phosphate metabolic process	17/530	189/15517	0.000267559	0.00546528	0.00494114	282578/327675/327668/338081/617230/338053/337887/540176/506492/515696/282701/282710/282690/281640/407767/615447/537688	17
E50	GO:0006986	response to unfolded protein	7/530	39/15517	0.000309969	0.00623982	0.0056414	613577/282254/415113/539835/281831/517535/511913	7
E50	GO:0046456	icosanoid biosynthetic process	4/530	11/15517	0.000366698	0.0072344	0.0065406	613869/327662/493638/282022	4
E50	GO:0045185	maintenance of protein location	6/530	29/15517	0.000375002	0.0072344	0.0065406	511899/618184/531676/525408/282385/282386	6
E50	GO:0045727	positive regulation of translation	6/530	29/15517	0.000375002	0.0072344	0.0065406	504831/512350/444990/526320/533892/338071	6
E50	GO:0071621	granulocyte chemotaxis	8/530	53/15517	0.00040197	0.00759651	0.00686798	327662/616732/281043/282170/414347/281044/282226/786492	8
E50	GO:0009259	ribonucleotide metabolic process	16/530	178/15517	0.00040471	0.00759651	0.00686798	282578/327675/327668/338081/617230/338053/337887/540176/506492/515696/282701/282710/282690/281640/407767/615447	16
E50	GO:0097529	myeloid leukocyte migration	9/530	67/15517	0.000433158	0.00802209	0.00725274	327662/616732/281043/282170/414347/281044/509230/282226/786492	9
E50	GO:0140694	non-membrane-bounded organelle assembly	15/530	164/15517	0.000506285	0.00925302	0.00836562	518321/282254/507845/286790/507168/282688/515238/286868/282050/514569/516063/615638/282877/506229/281898	15
E50	GO:0034250	positive regulation of cellular amide metabolic process	6/530	31/15517	0.000548544	0.00989517	0.00894618	504831/512350/444990/526320/533892/338071	6
E50	GO:0002548	monocyte chemotaxis	6/530	32/15517	0.00065588	0.0116797	0.0105596	616732/281043/282170/414347/281044/786492	6
E50	GO:0051651	maintenance of location in cell	8/530	58/15517	0.000748875	0.0131669	0.0119042	327685/281173/286861/511899/618184/531676/282385/282386	8
E50	GO:0009117	nucleotide metabolic process	19/530	245/15517	0.000774105	0.0134404	0.0121514	282578/327675/327668/338081/617230/338053/337887/540176/506492/515696/282701/282710/282690/281640/507945/407767/509624/615447/537688	19
E50	GO:0008380	RNA splicing	20/530	265/15517	0.000799537	0.0137106	0.0123957	531336/507120/535258/614215/533700/506917/528135/282018/509771/513083/614553/508788/514932/617823/540276/507828/507066/534586/615156/614551	20
E50	GO:0030593	neutrophil chemotaxis	7/530	46/15517	0.000877757	0.0148684	0.0134424	616732/281043/282170/414347/281044/282226/786492	7
E50	GO:0006417	regulation of translation	9/530	74/15517	0.000906848	0.015176	0.0137206	504831/512350/515326/444990/526320/509771/767925/533892/338071	9
E50	GO:0006163	purine nucleotide metabolic process	17/530	211/15517	0.000945987	0.0156426	0.0141424	282578/327675/327668/338081/617230/338053/337887/540176/506492/515696/282701/282710/282690/281640/407767/615447/537688	17
E50	GO:0071674	mononuclear cell migration	7/530	47/15517	0.0010015	0.0163657	0.0147962	616732/281043/282170/414347/281044/509230/786492	7
E50	GO:0070555	response to interleukin-1	6/530	35/15517	0.00107727	0.0173992	0.0157306	327662/616732/281043/282170/414347/281044	6
E50	GO:0032507	maintenance of protein location in cell	5/530	24/15517	0.00113107	0.0180582	0.0163263	511899/618184/531676/282385/282386	5
E50	GO:0010628	positive regulation of gene expression	13/530	142/15517	0.00116379	0.0183694	0.0166077	327662/507120/504831/512350/444990/511913/526320/509771/533892/338071/540234/534586/615156	13
E50	GO:0072676	lymphocyte migration	6/530	36/15517	0.00125597	0.0196015	0.0177217	616732/281043/282170/414347/281044/509230	6
E50	GO:0006122	mitochondrial electron transport, ubiquinol to cytochrome c	4/530	15/15517	0.00136026	0.0209814	0.0189692	616109/281570/287020/613899	4
E50	GO:0072583	clathrin-dependent endocytosis	5/530	25/15517	0.00137459	0.0209814	0.0189692	536553/281078/281698/505206/538501	5
E50	GO:0070972	protein localization to endoplasmic reticulum	6/530	37/15517	0.00145646	0.0219893	0.0198805	511899/618184/531676/615778/767917/613974	6
E50	GO:0060326	cell chemotaxis	10/530	95/15517	0.00148683	0.0222065	0.0200768	327662/616732/281043/282170/414347/281044/286836/281743/282226/786492	10
E50	GO:0034248	regulation of cellular amide metabolic process	9/530	80/15517	0.00158891	0.0232316	0.0210036	504831/512350/515326/444990/526320/509771/767925/533892/338071	9
E50	GO:0051235	maintenance of location	9/530	80/15517	0.00158891	0.0232316	0.0210036	327685/281173/286861/511899/618184/531676/525408/282385/282386	9
E50	GO:0000027	ribosomal large subunit assembly	5/530	26/15517	0.00165466	0.0239409	0.0216449	286790/507168/282688/515238/286868	5
E50	GO:0006753	nucleoside phosphate metabolic process	19/530	262/15517	0.00170403	0.024401	0.0220608	282578/327675/327668/338081/617230/338053/337887/540176/506492/515696/282701/282710/282690/281640/507945/407767/509624/615447/537688	19
E50	GO:0055086	nucleobase-containing small molecule metabolic process	21/530	303/15517	0.00175019	0.0248062	0.0224272	282578/327675/327668/338081/617230/338053/337887/540176/506492/515696/282701/282710/282690/281640/507945/407767/509624/615447/505648/537688/535325	21
E50	GO:0010035	response to inorganic substance	7/530	52/15517	0.00183982	0.0258132	0.0233376	327662/531682/508956/281209/281997/286793/281495	7
E50	GO:0048247	lymphocyte chemotaxis	5/530	27/15517	0.00197444	0.0271534	0.0245493	616732/281043/282170/414347/281044	5
E50	GO:0071346	cellular response to interferon-gamma	5/530	27/15517	0.00197444	0.0271534	0.0245493	616732/281043/282170/414347/281044	5
E50	GO:0030595	leukocyte chemotaxis	8/530	68/15517	0.00214538	0.029215	0.0264132	327662/616732/281043/282170/414347/281044/282226/786492	8
E50	GO:0072521	purine-containing compound metabolic process	17/530	228/15517	0.00218558	0.0294735	0.0266469	282578/327675/327668/338081/617230/338053/337887/540176/506492/515696/282701/282710/282690/281640/407767/615447/537688	17
E50	GO:0051726	regulation of cell cycle	19/530	271/15517	0.00249829	0.0333666	0.0301667	327662/281032/541054/281671/504847/538167/513497/510972/767985/505463/618405/539696/282254/280831/514246/517192/614028/539449/533251	19
E50	GO:0071310	cellular response to organic substance	27/530	441/15517	0.00256286	0.0339029	0.0306515	327662/404192/616732/281043/282170/414347/281044/414345/509418/407210/613577/282254/415113/539835/281831/517535/511913/507359/511899/540246/614849/616375/525408/528390/514541/617017/280943	27
E50	GO:1901137	carbohydrate derivative biosynthetic process	23/530	359/15517	0.002973	0.0389576	0.0352214	282578/327675/327668/338081/617230/338053/337887/540176/506492/515696/282701/282710/282690/281640/100271926/510682/507945/510575/539959/615447/505648/537688/535325	23
E50	GO:0000375	RNA splicing, via transesterification reactions	16/530	217/15517	0.00325091	0.0414268	0.0374538	507120/535258/614215/533700/528135/509771/614553/508788/514932/617823/540276/507828/507066/534586/615156/614551	16
E50	GO:0000377	RNA splicing, via transesterification reactions with bulged adenosine as nucleophile	16/530	217/15517	0.00325091	0.0414268	0.0374538	507120/535258/614215/533700/528135/509771/614553/508788/514932/617823/540276/507828/507066/534586/615156/614551	16
E50	GO:0000398	mRNA splicing, via spliceosome	16/530	217/15517	0.00325091	0.0414268	0.0374538	507120/535258/614215/533700/528135/509771/614553/508788/514932/617823/540276/507828/507066/534586/615156/614551	16
E50	GO:0050900	leukocyte migration	9/530	89/15517	0.00332614	0.042	0.0379721	327662/616732/281043/282170/414347/281044/509230/282226/786492	9
E50	GO:0000462	maturation of SSU-rRNA from tricistronic rRNA transcript (SSU-rRNA, 5.8S rRNA, LSU-rRNA)	5/530	31/15517	0.00371465	0.0464833	0.0420254	282050/506297/615178/404140/614984	5
E58	GO:0022402	cell cycle process	35/340	442/15517	4.76396e-11	6.16457e-08	5.53622e-08	534849/504869/783256/537027/520428/281061/533089/100336205/513594/786852/533980/531418/532280/508467/514679/537127/787969/506353/513220/531234/516644/538789/525337/534848/788127/524870/282041/616342/615847/506218/515350/537517/787696/617078/524925	35
E58	GO:0000278	mitotic cell cycle	28/340	309/15517	2.14312e-10	1.3866e-07	1.24527e-07	534849/538990/537027/520428/281061/281681/533089/100336205/513594/786852/533980/531418/508467/514679/537127/506353/513220/531234/516644/538789/519463/534848/524870/282041/615847/506218/515350/524925	28
E58	GO:1903047	mitotic cell cycle process	23/340	230/15517	1.38274e-09	5.96422e-07	5.3563e-07	537027/520428/281061/533089/100336205/513594/786852/533980/531418/508467/514679/537127/506353/513220/531234/516644/538789/534848/524870/282041/506218/515350/524925	23
E58	GO:0007059	chromosome segregation	16/340	149/15517	1.7372e-07	5.61983e-05	5.04701e-05	537027/533089/531418/508467/514679/787969/506353/513220/531234/516644/538789/615847/515350/537517/787696/524925	16
E58	GO:0000819	sister chromatid segregation	11/340	73/15517	5.03231e-07	0.000112038	0.000100618	537027/531418/508467/514679/506353/531234/516644/538789/515350/787696/524925	11
E58	GO:0140014	mitotic nuclear division	12/340	89/15517	5.27608e-07	0.000112038	0.000100618	537027/520428/531418/508467/514679/506353/513220/531234/516644/538789/515350/524925	12
E58	GO:0098813	nuclear chromosome segregation	13/340	107/15517	6.0608e-07	0.000112038	0.000100618	537027/533089/531418/508467/514679/787969/506353/531234/516644/538789/515350/787696/524925	13
E58	GO:0051128	regulation of cellular component organization	27/340	440/15517	1.50689e-06	0.000243739	0.000218895	504245/781834/533796/537027/520387/515249/509221/537297/538419/506201/539601/531691/782315/506353/513220/523498/533729/514554/518168/530858/282041/514798/515350/785664/529494/617078/524925	27
E58	GO:0000226	microtubule cytoskeleton organization	22/340	318/15517	2.11238e-06	0.000303713	0.000272756	534849/533796/533248/520428/100336205/515249/533980/531418/532280/537739/508467/514679/537127/519463/519892/527964/525337/282041/616342/510352/515350/617078	22
E58	GO:0000070	mitotic sister chromatid segregation	10/340	69/15517	2.41317e-06	0.000312265	0.000280436	537027/531418/508467/514679/506353/531234/516644/538789/515350/524925	10
E58	GO:0051276	chromosome organization	17/340	212/15517	4.442e-06	0.000522541	0.000469279	781834/504869/537027/504630/531418/508467/514679/506353/531234/516644/538789/788127/539217/515350/787696/524925/531945	17
E58	GO:0043087	regulation of GTPase activity	14/340	153/15517	6.91732e-06	0.000745917	0.000669888	504245/537297/537464/100295817/782315/515330/518168/616166/789713/282516/523745/522344/504334/614554	14
E58	GO:0043547	positive regulation of GTPase activity	12/340	116/15517	9.00878e-06	0.00089672	0.000805319	504245/537297/537464/100295817/515330/616166/789713/282516/523745/522344/504334/614554	12
E58	GO:0048285	organelle fission	15/340	180/15517	1.02352e-05	0.000946024	0.000849598	783256/537027/520428/531418/508467/514679/506353/513220/531234/516644/538789/515350/510486/787696/524925	15
E58	GO:0000280	nuclear division	14/340	161/15517	1.24463e-05	0.0010737	0.000964263	783256/537027/520428/531418/508467/514679/506353/513220/531234/516644/538789/515350/787696/524925	14
E58	GO:0007017	microtubule-based process	26/340	487/15517	2.78323e-05	0.00225094	0.00202151	534849/533796/533248/520428/281681/100336205/515249/533980/531418/532280/506612/537739/508467/514679/537127/510995/519463/519892/527964/525337/282041/616342/510352/507819/515350/617078	26
E58	GO:0033043	regulation of organelle organization	18/340	273/15517	3.4165e-05	0.00260056	0.00233549	504245/781834/533796/537027/520387/515249/506201/539601/782315/506353/513220/523498/533729/530858/282041/515350/617078/524925	18
E58	GO:0120036	plasma membrane bounded cell projection organization	25/340	478/15517	5.55442e-05	0.00399301	0.00358601	520428/100336205/533903/613555/537297/537464/506612/785366/100337226/538419/507389/531691/513641/539369/533729/525337/514554/518168/539311/514798/507819/529494/615652/618601/527992	25
E58	GO:0030030	cell projection organization	25/340	484/15517	6.78746e-05	0.00443724	0.00398496	520428/100336205/533903/613555/537297/537464/506612/785366/100337226/538419/507389/531691/513641/539369/533729/525337/514554/518168/539311/514798/507819/529494/615652/618601/527992	25
E58	GO:0006302	double-strand break repair	12/340	142/15517	6.85818e-05	0.00443724	0.00398496	353120/507069/783256/532916/505585/535323/788127/617007/525756/541239/531945/539572	12
E58	GO:0007052	mitotic spindle organization	7/340	49/15517	8.87628e-05	0.00527787	0.0047399	100336205/533980/531418/508467/514679/537127/515350	7
E58	GO:0051345	positive regulation of hydrolase activity	12/340	146/15517	8.97319e-05	0.00527787	0.0047399	504245/537297/537464/100295817/515330/616166/789713/282516/523745/522344/504334/614554	12
E58	GO:0007098	centrosome cycle	7/340	52/15517	0.000130684	0.0071494	0.00642067	533980/532280/525337/282041/616342/515350/617078	7
E58	GO:0006259	DNA metabolic process	22/340	416/15517	0.000132601	0.0071494	0.00642067	504869/353120/507069/783256/511951/281762/514863/532916/533115/505585/532708/534848/535323/788127/617007/525756/541239/513640/787696/531945/539572/529922	22
E58	GO:0031023	microtubule organizing center organization	7/340	53/15517	0.000147776	0.00764891	0.00686927	533980/532280/525337/282041/616342/515350/617078	7
E58	GO:0007264	small GTPase mediated signal transduction	15/340	231/15517	0.000180967	0.00900657	0.00808855	504245/511433/537203/537297/537464/100295817/538419/516048/615910/616166/789713/523745/522344/504334/282041	15
E58	GO:0048699	generation of neurons	20/340	369/15517	0.000193099	0.00925443	0.00831114	538990/613555/537464/506612/785366/100337226/507389/531691/513641/539369/533729/539222/518168/539311/532565/514798/616342/507819/529494/618601	20
E58	GO:0006974	cellular response to DNA damage stimulus	19/340	346/15517	0.000235869	0.0109005	0.00978946	504869/353120/507069/783256/281061/511951/281762/532916/533115/505585/535323/788127/617007/525756/541239/510164/531945/539572/529922	19
E58	GO:1902850	microtubule cytoskeleton organization involved in mitosis	7/340	58/15517	0.000262507	0.0117133	0.0105194	100336205/533980/531418/508467/514679/537127/515350	7
E58	GO:0007051	spindle organization	8/340	78/15517	0.000302213	0.0130355	0.0117068	534849/100336205/533980/531418/508467/514679/537127/515350	8
E58	GO:0034502	protein localization to chromosome	4/340	16/15517	0.000334572	0.0139657	0.0125422	787969/506353/541239/524925	4
E58	GO:0048666	neuron development	16/340	273/15517	0.00035592	0.0139758	0.0125513	537464/506612/785366/100337226/507389/531691/513641/539369/533729/539222/518168/539311/514798/507819/529494/618601	16
E58	GO:0031175	neuron projection development	15/340	246/15517	0.000356416	0.0139758	0.0125513	537464/506612/785366/100337226/507389/531691/513641/539369/533729/518168/539311/514798/507819/529494/618601	15
E58	GO:0006281	DNA repair	16/340	275/15517	0.000385848	0.0145656	0.0130809	353120/507069/783256/511951/281762/532916/533115/505585/535323/788127/617007/525756/541239/531945/539572/529922	16
E58	GO:0010564	regulation of cell cycle process	12/340	171/15517	0.000393968	0.0145656	0.0130809	504869/537027/520428/281061/533089/506353/513220/524870/282041/515350/617078/524925	12
E58	GO:0022008	neurogenesis	20/340	409/15517	0.000721326	0.0259277	0.0232849	538990/613555/537464/506612/785366/100337226/507389/531691/513641/539369/533729/539222/518168/539311/532565/514798/616342/507819/529494/618601	20
E58	GO:0048812	neuron projection morphogenesis	12/340	185/15517	0.000795691	0.0263104	0.0236286	537464/785366/100337226/531691/513641/539369/533729/518168/514798/507819/529494/618601	12
E58	GO:0030182	neuron differentiation	18/340	353/15517	0.00081811	0.0263104	0.0236286	538990/537464/506612/785366/100337226/507389/531691/513641/539369/533729/539222/518168/539311/532565/514798/507819/529494/618601	18
E58	GO:0000281	mitotic cytokinesis	4/340	20/15517	0.000831067	0.0263104	0.0236286	513594/786852/282041/506218	4
E58	GO:0090307	mitotic spindle assembly	4/340	20/15517	0.000831067	0.0263104	0.0236286	531418/508467/514679/515350	4
E58	GO:1901990	regulation of mitotic cell cycle phase transition	7/340	70/15517	0.000836603	0.0263104	0.0236286	537027/520428/281061/533089/506353/524870/524925	7
E58	GO:0048858	cell projection morphogenesis	12/340	187/15517	0.000874301	0.0263104	0.0236286	537464/785366/100337226/531691/513641/539369/533729/518168/514798/507819/529494/618601	12
E58	GO:0120039	plasma membrane bounded cell projection morphogenesis	12/340	187/15517	0.000874301	0.0263104	0.0236286	537464/785366/100337226/531691/513641/539369/533729/518168/514798/507819/529494/618601	12
E58	GO:0051656	establishment of organelle localization	10/340	139/15517	0.000979645	0.0288105	0.0258739	534849/533089/506612/536759/787969/538789/527964/507819/515350/510568	10
E58	GO:0051310	metaphase plate congression	4/340	22/15517	0.00121214	0.0344474	0.0309362	533089/787969/538789/515350	4
E58	GO:0007346	regulation of mitotic cell cycle	9/340	119/15517	0.00122456	0.0344474	0.0309362	538990/537027/520428/281061/533089/506353/513220/524870/524925	9
E58	GO:0045786	negative regulation of cell cycle	8/340	97/15517	0.00130139	0.0358299	0.0321778	504869/538990/537027/281061/506353/524870/617078/524925	8
E58	GO:0048667	cell morphogenesis involved in neuron differentiation	11/340	172/15517	0.00145864	0.0389081	0.0349423	537464/785366/100337226/531691/539369/533729/518168/514798/507819/529494/618601	11
E58	GO:0010948	negative regulation of cell cycle process	7/340	77/15517	0.00147333	0.0389081	0.0349423	504869/537027/281061/506353/524870/617078/524925	7
E58	GO:0120035	regulation of plasma membrane bounded cell projection organization	8/340	100/15517	0.00158372	0.0409868	0.0368091	537297/538419/531691/533729/514554/518168/514798/529494	8
E58	GO:0006310	DNA recombination	10/340	149/15517	0.00165753	0.0420556	0.037769	353120/507069/783256/532916/533115/505585/788127/617007/787696/531945	10
E58	GO:0051301	cell division	7/340	79/15517	0.00171118	0.0425822	0.0382419	520428/513594/786852/787969/282041/615847/506218	7
E58	GO:0006979	response to oxidative stress	6/340	59/15517	0.00179562	0.0430722	0.0386819	281762/541071/530858/515860/538226/515914	6
E58	GO:1901987	regulation of cell cycle phase transition	8/340	102/15517	0.00179745	0.0430722	0.0386819	504869/537027/520428/281061/533089/506353/524870/524925	8
E58	GO:0043085	positive regulation of catalytic activity	14/340	262/15517	0.00197312	0.0464221	0.0416904	504245/537297/537464/100295817/515330/532708/540106/616166/789713/282516/523745/522344/504334/614554	14
E58	GO:0031344	regulation of cell projection organization	8/340	104/15517	0.00203332	0.0469843	0.0421953	537297/538419/531691/533729/514554/518168/514798/529494	8

## Sheet: cow Cell type top50 KEGG
The KEGG that is most correlated with each related cell type and trait(each cell type top50)
bta04010	MAPK signaling pathway
bta04066	HIF-1 signaling pathway
bta03410	Base excision repair
bta04110	Cell cycle
bta04115	p53 signaling pathway
bta04136	Autophagy - other
bta04928	Parathyroid hormone synthesis, secretion and action
bta04915	Estrogen signaling pathway
bta04924	Renin secretion
bta04014	Ras signaling pathway
bta04371	Apelin signaling pathway
bta03460	Fanconi anemia pathway
bta03040	Spliceosome
bta04713	Circadian entrainment
bta05224	Breast cancer
bta04975	Fat digestion and absorption
bta00600	Sphingolipid metabolism
bta04664	Fc epsilon RI signaling pathway
bta04650	Natural killer cell mediated cytotoxicity
bta04662	B cell receptor signaling pathway
bta04012	ErbB signaling pathway
bta04660	T cell receptor signaling pathway
bta04979	Cholesterol metabolism
bta00514	bta00514
bta04918	Thyroid hormone synthesis
bta00240	Pyrimidine metabolism
bta00051	Fructose and mannose metabolism
bta03440	Homologous recombination
bta00052	Galactose metabolism
bta05146	Amoebiasis
bta04728	Dopaminergic synapse
bta05135	Yersinia infection
bta03030	bta03030
bta05017	Spinocerebellar ataxia
bta04071	Sphingolipid signaling pathway
bta05416	Viral myocarditis
bta00040	Pentose and glucuronate interconversions
bta00770	Pantothenate and CoA biosynthesis
bta05142	Chagas disease
bta04750	Inflammatory mediator regulation of TRP channels
bta04062	Chemokine signaling pathway
bta04070	Phosphatidylinositol signaling system
bta04929	GnRH secretion
bta04720	Long-term potentiation
bta05152	Tuberculosis
bta04015	Rap1 signaling pathway
bta04972	Pancreatic secretion
bta04145	Phagosome
bta04540	Gap junction
bta05133	Pertussis
bta04261	Adrenergic signaling in cardiomyocytes
bta04934	Cushing syndrome
bta04916	Melanogenesis
bta05216	bta05216
bta04310	Wnt signaling pathway
bta04973	Carbohydrate digestion and absorption
bta04530	Tight junction
bta05163	Human cytomegalovirus infection
bta00562	Inositol phosphate metabolism
bta04926	Relaxin signaling pathway
bta04927	Cortisol synthesis and secretion
bta04933	AGE-RAGE signaling pathway in diabetic complications
bta00520	Amino sugar and nucleotide sugar metabolism
bta04141	Protein processing in endoplasmic reticulum
bta05415	Diabetic cardiomyopathy
bta03250	Viral life cycle
bta04146	Peroxisome
bta00030	Pentose phosphate pathway
bta04020	Calcium signaling pathway
bta04137	Mitophagy - animal
bta04060	Cytokine-cytokine receptor interaction
bta00140	Steroid hormone biosynthesis
bta05210	Colorectal cancer
bta05220	Chronic myeloid leukemia
bta04978	Mineral absorption
bta04659	Th17 cell differentiation
bta04658	Th1 and Th2 cell differentiation
bta05161	Hepatitis B
bta00640	Propanoate metabolism
bta04390	Hippo signaling pathway
bta04913	Ovarian steroidogenesis
bta00280	Valine, leucine and isoleucine degradation
bta03420	Nucleotide excision repair
bta00260	Glycine, serine and threonine metabolism
bta00970	Aminoacyl-tRNA biosynthesis
bta04610	Complement and coagulation cascades
bta04623	Cytosolic DNA-sensing pathway
bta05166	Human T-cell leukemia virus 1 infection
bta04114	Oocyte meiosis
bta05170	Human immunodeficiency virus 1 infection
bta03020	Huntington disease
bta04350	TGF-beta signaling pathway
bta04550	Regulating pluripotency of stem cells
bta04022	cGMP-PKG signaling pathway
bta04260	Cardiac muscle contraction
bta00061	Fatty acid biosynthesis
bta04218	Cellular senescence
bta05226	Gastric cancer
bta03320	PPAR signaling pathway
bta05206	MicroRNAs in cancer
bta04150	mTOR signaling pathway
bta05205	Proteoglycans in cancer
bta04970	Salivary secretion
bta04520	Adherens junction
bta04714	Thermogenesis
bta05217	Basal cell carcinoma
bta05225	Hepatocellular carcinoma
bta04614	Renin-angiotensin system
bta04611	Platelet activation
bta04923	Regulation of lipolysis in adipocytes
bta04612	Antigen processing and presentation
bta00190	Oxidative phosphorylation
bta05160	Hepatitis C
bta04657	IL-17 signaling pathway
bta05223	Non-small cell lung cancer
bta00561	Glycerolipid metabolism
bta05214	Glioma
bta05218	Melanoma
bta04072	Phospholipase D signaling pathway
bta04148	Efferocytosis
bta00500	Starch and sucrose metabolism
bta00410	beta-Alanine metabolism
bta03450	Non-homologous end-joining
bta00430	Taurine and hypotaurine metabolism
bta05322	Systemic lupus erythematosus
bta04966	Collecting duct acid secretion
bta03430	Mismatch repair
bta04725	Cholinergic synapse
bta04971	Gastric acid secretion
bta00100	Steroid biosynthesis
bta00340	Histidine metabolism
bta05323	Rheumatoid arthritis
bta05219	Bladder cance
bta04621	NOD-like receptor signaling pathway
bta05202	Transcriptional misregulation in cancer
bta04152	AMPK signaling pathway
bta00230	Purine metabolism
bta05417	Lipid and atherosclerosis
bta00565	Ether lipid metabolism
bta04670	Leukocyte transendothelial migration

## Sheet: cow Macrophages and monocytes
Human Macrophages and monocytes are the most correlated KEGG with traits(top50)
bta05417	Lipid and atherosclerosis
bta04972	Pancreatic secretion
bta04929	GnRH secretion
bta04750	Inflammatory mediator regulation of TRP channels
bta04720	Long-term potentiation
bta04540	Gap junction
bta04070	Phosphatidylinositol signaling system
bta04015	Rap1 signaling pathway
bta04062	Chemokine signaling pathway
bta04612	Antigen processing and presentation
bta00565	Ether lipid metabolism
bta04670	Leukocyte transendothelial migration
bta05323	Rheumatoid arthritis
bta04621	NOD-like receptor signaling pathway
bta04971	Gastric acid secretion
bta03030	bta03030
bta03040	Spliceosome
bta03440	Homologous recombination
bta04657	IL-17 signaling pathway
bta04148	Efferocytosis
bta05223	Non-small cell lung cancer
bta04728	Dopaminergic synapse
bta00514	bta00514
bta05146	Amoebiasis
bta05135	Yersinia infection
bta00240	Pyrimidine metabolism
bta05017	Spinocerebellar ataxia
bta04979	Cholesterol metabolism
bta04975	Fat digestion and absorption
bta04924	Renin secretion
bta04918	Thyroid hormone synthesis
bta04915	Estrogen signaling pathway
bta04664	Fc epsilon RI signaling pathway
bta04660	T cell receptor signaling pathway
bta04650	Natural killer cell mediated cytotoxicity
bta04371	Apelin signaling pathway
bta04115	p53 signaling pathway
bta04110	Cell cycle
bta04072	Phospholipase D signaling pathway
bta04071	Sphingolipid signaling pathway
bta00051	Fructose and mannose metabolism
bta04066	HIF-1 signaling pathway
bta04014	Ras signaling pathway
bta04012	ErbB signaling pathway
bta04010	MAPK signaling pathway
bta03460	Fanconi anemia pathway
bta00040	Pentose and glucuronate interconversions
bta03410	Base excision repair
bta00770	Pantothenate and CoA biosynthesis
bta00561	Glycerolipid metabolism
bta00600	Sphingolipid metabolism
bta04137	Mitophagy - animal
bta04662	B cell receptor signaling pathway
bta03430	Mismatch repair
bta00052	Galactose metabolism
bta05160	Hepatitis C
bta00410	beta-Alanine metabolism
bta05202	Transcriptional misregulation in cancer
bta00230	Purine metabolism
bta03450	Non-homologous end-joining
bta04152	AMPK signaling pathway
bta00430	Taurine and hypotaurine metabolism
bta00030	Pentose phosphate pathway
bta05322	Systemic lupus erythematosus
bta00500	Starch and sucrose metabolism
bta04966	Collecting duct acid secretion
bta05214	Glioma

## Sheet: Human Macrophages and monocytes
Human Macrophages and monocytes are the most correlated KEGG with traits(top50)
hsa04340	Hedgehog signaling pathway
hsa00220	Arginine biosynthesis
hsa04115	p53 signaling pathway
hsa00330	Arginine and proline metabolism
hsa04977	Vitamin digestion and absorption
hsa00260	Glycine, serine and threonine metabolism
hsa00480	Glutathione metabolism
hsa04974	Protein digestion and absorption
hsa05322	Systemic lupus erythematosus
hsa05150	Staphylococcus aureus infection
hsa04975	Fat digestion and absorption
hsa04672	Intestinal immune network for IgA production
hsa04613	Neutrophil extracellular trap formation
hsa04512	ECM-receptor interaction
hsa00983	Drug metabolism - other enzymes
hsa00790	Folate biosynthesis
hsa00511	Other glycan degradation
hsa00561	Glycerolipid metabolism
hsa00500	Starch and sucrose metabolism
hsa00910	Nitrogen metabolism
hsa04371	Apelin signaling pathway
hsa04929	GnRH secretion
hsa00030	Pentose phosphate pathway
hsa05417	Lipid and atherosclerosis
hsa05210	Colorectal cancer
hsa05017	Spinocerebellar ataxia
hsa04614	Renin-angiotensin system
hsa04216	Ferroptosis
hsa04136	Autophagy - other
hsa04012	ErbB signaling pathway
hsa04010	MAPK signaling pathway
hsa03018	RNA degradation
hsa03060	Protein export
hsa04630	JAK-STAT signaling pathway
hsa04728	Dopaminergic synapse
hsa04020	Calcium signaling pathway
hsa00071	Fatty acid degradation
hsa05231	Choline metabolism in cancer
hsa05143	African trypanosomiasis
hsa05146	Amoebiasis
hsa04217	Necroptosis
hsa04330	Notch signaling pathway
hsa05415	Diabetic cardiomyopathy
hsa05162	Measles
hsa04978	Mineral absorption
hsa04973	Carbohydrate digestion and absorption
hsa04972	Pancreatic secretion
hsa04970	Salivary secretion
hsa04964	Proximal tubule bicarbonate reclamation
hsa04960	Aldosterone-regulated sodium reabsorption
hsa04911	Insulin secretion
hsa04722	Neurotrophin signaling pathway
hsa04668	TNF signaling pathway
hsa04666	Fc gamma R-mediated phagocytosis
hsa04662	B cell receptor signaling pathway
hsa04623	Cytosolic DNA-sensing pathway
hsa04380	Osteoclast differentiation
hsa04310	Wnt signaling pathway
hsa04261	Adrenergic signaling in cardiomyocytes
hsa04210	Apoptosis
hsa04150	mTOR signaling pathway
hsa04142	Lysosome
hsa00061	Fatty acid biosynthesis
hsa04140	Autophagy - animal
hsa04064	NF-kappa B signaling pathway
hsa03320	PPAR signaling pathway
hsa00860	Porphyrin metabolism
hsa00640	Propanoate metabolism
hsa00770	Pantothenate and CoA biosynthesis
hsa00053	Ascorbate and aldarate metabolism
hsa00190	Oxidative phosphorylation
hsa05222	Small cell lung cancer
hsa05120	Epithelial cell signaling in Helicobacter pylori infection
hsa00340	Histidine metabolism

## Sheet: Retained_Placenta_cow_PCC
Retained_Placenta_cow_gene PCC
	PCC
MT-ND5	0.480712
COLEC12	0.464891
MT-CYB	0.446121
MT-CO1	0.44119
SELENOP	0.435945
MT-ND2	0.433622
HSPD1	0.431817
MT-ND4	0.430001
MT-ATP6	0.428836
HSP90AB1	0.422673
HMOX1	0.421588
LMNA	0.420331
CLTA	0.420165
ATP1B3	0.417711
MT-ND3	0.417583
HSP90AA1	0.416978
MT-ND1	0.411242
CST3	0.407181
RACK1	0.405762
SLC25A6	0.405138
MT-CO3	0.400958
TINAGL1	0.397282
TCAF1	0.395883
MT-CO2	0.395323
RPS2	0.390415
TCEAL9	0.388557
HSPA8	0.386989
GNAS	0.385487
BEX3	0.384717
CEMIP2	0.384097
HSPH1	0.383018
EEF1A1	0.379397
ITGB1	0.379161
CAVIN1	0.376613
NRP1	0.373716
ADGRG1	0.373198
ATP5F1B	0.372468
HSPA5	0.370765
MRC1	0.369728
KLF4	0.365206
SPINT1	0.364575
RHOB	0.363906
JUN	0.359903
NFE2L3	0.357238
TACSTD2	0.355903
TENT5A	0.353811
XAGE2	0.350026
YBX1	0.349346
SELENOH	0.345617
CTNNB1	0.345175
HSD17B1	0.343888
ATF3	0.343048
BTG3	0.342323
ARL4C	0.341849
JUND	0.341526
MESD	0.341038
DNAJA1	0.340815
ARL4A	0.340675
SFPQ	0.340591
APLP2	0.340532
VWA1	0.340524
PHLDA2	0.339186
AL121944.1	0.338402
MYDGF	0.336573
HSPE1	0.335872
CEBPD	0.335212
DUSP9	0.334406
ATP5F1C	0.333796
MORC4	0.331447
NRP2	0.329754
ATP5F1A	0.329017
PEG10	0.32782
MSX2	0.327325
GADD45A	0.327235
BCAM	0.327224
EIF4A3	0.327136
NR4A1	0.327112
PERP	0.324583
CKS2	0.323679
SEM1	0.320961
IDI1	0.319042
NCL	0.314324
DUSP5	0.3143
CALR	0.314082
YBX3	0.31377
TFRC	0.312271
NUFIP2	0.311467
MT-ND4L	0.311402
SRSF2	0.311224
ATP5MC3	0.310859
FAM89A	0.310175
TUSC3	0.309622
RPL13	0.309226
HSP90B1	0.30771
EGFR	0.306241
EEA1	0.305099
PDIA3	0.304746
DNAJB4	0.304144
ATP1B1	0.303865
MLLT1	0.302801
EIF3A	0.301898
DSP	0.301722
TUBA1C	0.301571
TUBB4B	0.301252
DYNC1H1	0.301139
SARAF	0.298723
ATP5PF	0.298524
ATP5MF	0.297781
RTRAF	0.297409
SELENOK	0.296523
RPL22	0.295332
NUDT4	0.295179
PMAIP1	0.294329
RPS17	0.294318
RPS29	0.293807
EIF1AX	0.293605
RPL41	0.293579
FNIP2	0.293389
APP	0.293117
MDM2	0.292366
RBM47	0.291554
ITGA6	0.290556
NCOA3	0.289658
CD81	0.289518
SQSTM1	0.288011
ATP5MC2	0.286475
F13A1	0.286368
HMGA1	0.285888
NASP	0.285775
HACD3	0.285747
ZNF165	0.285262
LYVE1	0.285057
ELOC	0.285008
BAG3	0.284783
ANKH	0.284233
H2AFX	0.283712
CD163	0.283193
CRIM1	0.282366
ATP5MG	0.281797
HSPA1B	0.280713
KLF5	0.280425
PSMC1	0.280225
CDV3	0.279839
ACADVL	0.279686
PEG3	0.279401
NOP53	0.278565
RPS21	0.27784
SERTAD1	0.275945
FABP5	0.27539
SH2B3	0.274599
PTMS	0.274194
HNRNPAB	0.274027
PNP	0.273951
TINCR	0.273587
SET	0.271542
HSPA1A	0.271109
PLIN2	0.27071
GCSH	0.270603
IER5	0.269906
B4GALT1	0.269427
RPL37A	0.26898
CD84	0.268452
L1TD1	0.267677
CYCS	0.267443
PSMA2	0.267122
KTN1	0.266957
MAFB	0.266675
MYC	0.265293
INSIG1	0.265079
CD83	0.264326
SLC27A2	0.263209
RASGEF1B	0.262135
FBN2	0.261869
SLCO2B1	0.261819
DEK	0.261564
ATP5PO	0.261278
C1QBP	0.260815
CTSZ	0.260338
UBB	0.259905
EIF5	0.259728
TTYH3	0.259719
ZFAND5	0.257199
PKIB	0.257
WSB1	0.256938
DNAJB1	0.256684
CTSC	0.256331
FAM198B	0.254965
NRIP1	0.254319
MS4A7	0.254189
RCN2	0.254141
DAB2	0.252244
ISYNA1	0.25204
CDH1	0.251954
GPR183	0.251801
LGMN	0.251734
CREG1	0.250721
ATP5F1D	0.25031
SLC3A2	0.248962
FDX1	0.248595
FOXC1	0.248579
CLDN4	0.247311
SLC26A2	0.247004
CRYBG1	0.246294
DNMT1	0.246131
RAC1	0.245717
EIF3F	0.244908
PTPN1	0.244297
HNRNPU	0.243879
FAM20A	0.243457
VCP	0.243087
IER2	0.24171
EZR	0.241485
YWHAG	0.241258
XIST	0.241131
IRX2	0.240328
PPIA	0.240269
ID4	0.23999
DDX5	0.239596
DSC2	0.239381
CTSL	0.23876
SNU13	0.238251
IFI6	0.236941
PARP1	0.23693
FAM84A	0.236882
CD209	0.236836
PIK3R1	0.236588
SMS	0.23464
RBBP6	0.234627
PLEKHO1	0.234229
CSF2RA	0.234093
DUSP14	0.23373
ELF3	0.233388
MAFF	0.232896
CSF1R	0.232802
ATP2A2	0.232385
CD99	0.231807
RPL39	0.231603
CITED2	0.231446
PLK2	0.231321
SIGLEC1	0.230855
ATP5IF1	0.230417
PDK4	0.2303
CD47	0.230249
TLNRD1	0.230188
SLC2A1	0.229975
PNRC2	0.229845
SNHG8	0.229715
CD24	0.229545
RPL23	0.229366
ARG2	0.229074
XBP1	0.228787
GOLGB1	0.228441
TOP1	0.228255
ID1	0.228025
TPST2	0.227622
TRIR	0.227524
EPB41L3	0.22745
ARF6	0.227427
STAB1	0.227077
GTF2B	0.226261
RPL37	0.225919
SNX9	0.225642
KCTD12	0.225514
RAB7B	0.224868
CD4	0.224816
AMD1	0.22464
SNX3	0.223825
ITGAV	0.22372
HSPB1	0.223619
TENM3	0.222561
CLIC3	0.222361
TFDP2	0.222094
TAF1D	0.222037
SRSF9	0.221864
DNAJA4	0.221628
ITIH5	0.220978
SLC38A2	0.220756
METRNL	0.220695
TNFRSF12A	0.220414
A2M	0.219834
TBX3	0.219796
HMGN1	0.219793
ARL6IP1	0.218722
LARGE2	0.218569
RPL38	0.218485
TSC22D2	0.217227
CTSV	0.217104
RNASE1	0.217025
COX5A	0.216824
HAVCR2	0.216538
AKAP13	0.21628
CAST	0.215868
TOB1	0.215537
DBI	0.215265
PDIA6	0.21497
HEXIM1	0.214875
DDX3X	0.214774
CANX	0.213328
MBNL3	0.213046
DDIT3	0.21301
HIST1H4C	0.212777
RHOV	0.21213
RND3	0.212045
LMO4	0.211986
TACC1	0.211604
P4HB	0.2112
SRRM2	0.211106
FOSB	0.210929
HNRNPDL	0.210127
ABL2	0.209973
MIR22HG	0.209609
BTG1	0.208789
CALM1	0.207989
SEMA6A	0.207909
ANXA5	0.207645
SOX4	0.207606
ATP5MPL	0.207471
CTNNAL1	0.20668
MTSS1	0.206566
NR2F6	0.205988
LILRB5	0.20574
RGCC	0.205639
SPINT2	0.205482
SELENOF	0.205258
ARID5B	0.204818
RPS16	0.204565
SLC16A10	0.204056
RPS11	0.203376
MEF2C	0.203319
IQGAP2	0.203216
NDUFB8	0.203124
CCL4L2	0.203099
DNAJB6	0.202888
SIAH2	0.202537
MAT2A	0.202323
IER5L	0.20218
CYR61	0.201668
ARHGAP18	0.201436
SLC25A3	0.201293
SCIN	0.199867
AHNAK	0.199752
RIPOR1	0.199259
PITHD1	0.199128
ID2	0.199048
UBE2H	0.198843
GALNT11	0.198695
SMAGP	0.198485
FKBP4	0.198144
RHOBTB3	0.19747
RPL7A	0.197424
ITGB5	0.197388
RAP2B	0.197125
MPP1	0.196873
LAIR1	0.196758
MITF	0.196505
ITPR2	0.19639
NPM1	0.196299
CDKN1A	0.195935
CLIP1	0.195907
CEBPB	0.1959
SLC20A1	0.195665
EHD4	0.195198
RPS12	0.195015
THBD	0.195012
RHEB	0.194981
UBE2S	0.19486
SINHCAF	0.194145
EFEMP1	0.193995
HNRNPD	0.193883
RPS25	0.193307
ANP32B	0.193144
ATP5PD	0.192975
ANXA1	0.192955
CFAP20	0.192721
MPEG1	0.192601
TPT1	0.19128
SLC5A3	0.191047
RHOU	0.190999
ADI1	0.190973
MYH10	0.190502
PLTP	0.190499
FUCA1	0.190401
CCNL1	0.190246
SELENOT	0.190019
MME	0.18985
RBM39	0.189768
BAG1	0.189562
CLDN3	0.189495
RETREG1	0.18946
TRAF5	0.189157
EMP1	0.189127
PRDX1	0.189114
AAK1	0.189014
LCMT1-AS2	0.188846
RTN4	0.188684
BRD2	0.188444
PEBP1	0.188293
TFAP2A	0.188126
MANF	0.187934
PRRC2C	0.187597
OVOL1	0.187436
DUSP1	0.187341
SELENOS	0.187278
RASA1	0.186665
HERPUD1	0.186528
ALDH7A1	0.186468
GOLGA4	0.185902
RSRC2	0.185786
HSPB8	0.185305
RPS28	0.184531
CEBPA	0.184228
IDH2	0.183731
RPS24	0.183704
LFNG	0.183024
KPNA2	0.182695
UBC	0.18255
PAGE4	0.181958
SIAH1	0.181335
NFKBIA	0.181183
RPL5	0.180817
EIF4E	0.180349
CHSY1	0.18028
HNRNPM	0.180086
EEF1B2	0.178977
ATP5MC1	0.178133
RIMKLB	0.178128
MSR1	0.17709
LHFPL2	0.176881
SRSF3	0.17613
RANBP2	0.175896
UTRN	0.175718
CHORDC1	0.175508
TNFRSF11A	0.175504
FUS	0.175499
GPR137B	0.175275
PSMD11	0.174642
PTGES3	0.17453
UQCRFS1	0.174269
GATA3	0.174205
RPS10	0.173848
RPL24	0.173767
SELENOW	0.173598
XAGE3	0.173489
CD28	0.173042
CSNK1A1	0.172946
PTP4A1	0.172574
MEST	0.172409
F5	0.171963
GCLM	0.171849
MFSD1	0.171689
C1QB	0.171534
SF3B6	0.171448
PTTG1IP	0.170905
FOLR2	0.170858
TCP1	0.17068
ACSL3	0.170663
TMBIM4	0.170427
ANKRD9	0.170405
MGST3	0.170001
EID2	0.16972
ASPH	0.16915
SLBP	0.169102
METTL7A	0.168979
NEU1	0.168962
HNRNPA0	0.168898
YY1	0.168773
C1GALT1	0.167557
SLC25A5	0.167379
CTSB	0.166974
AGAP3	0.166957
SRSF7	0.166677
FXYD3	0.166392
HNRNPA1	0.166391
CLTC	0.166256
CDKN1C	0.166141
TMEM263	0.166067
STK17A	0.166048
ATP5MD	0.165945
KRT7	0.165518
TSC22D1	0.165478
ARHGAP21	0.165175
TUBA1B	0.165083
MS4A4A	0.164743
MARVELD3	0.164536
OTUD1	0.164415
ADAM9	0.164364
NFATC1	0.164291
TFG	0.164181
RRBP1	0.16407
RPS23	0.163968
NFKB1	0.16396
PDCD7	0.163472
PGP	0.162998
GRASP	0.162839
RAD23B	0.16278
BMP7	0.162099
ARGLU1	0.161978
FBLN1	0.161243
ZEB2	0.161215
TGM2	0.161168
EIF4G2	0.161126
RPSA	0.160898
NCS1	0.160691
NRK	0.160572
TSPAN13	0.160006
SPAG9	0.159674
C1QC	0.159403
SOD1	0.159287
PXDC1	0.159036
HMGCS1	0.159022
TOMM20	0.158724
RPL18	0.158482
CSRP2	0.158364
RASGRP3	0.158319
MCRIP2	0.158241
MGAT1	0.158174
CD46	0.158102
PRNP	0.158088
CLDN23	0.158068
RDX	0.158003
CCND1	0.157807
ATP5PB	0.157197
PPTC7	0.156849
MAN1A1	0.1566
RPS7	0.156555
RPL36	0.156455
TFAP2C	0.155909
DOK2	0.155646
ZNF331	0.15539
GADD45GIP1	0.155058
MZT2B	0.155011
GAS6	0.154865
BHLHE40	0.154632
IGF1	0.154535
SH3TC1	0.154519
MAF	0.154402
TMIGD3	0.154397
H1FX	0.153754
SQLE	0.15326
PTMA	0.153201
REL	0.153165
RAN	0.15314
RPS8	0.153121
C1QA	0.152196
MT2A	0.152164
HSPA9	0.15212
CREM	0.152074
RASSF6	0.151884
PLPP3	0.151798
LIN28B	0.151611
ADRB1	0.151442
ATP5ME	0.151317
LDLR	0.151114
LAMP1	0.15102
ITM2B	0.150995
SPESP1	0.150901
CCT6A	0.150438
FAM13A	0.15016
RPL19	0.150063
HNRNPH1	0.149808
TENT4B	0.14945
CBLB	0.149323
SRSF5	0.149206
HES1	0.149184
SLK	0.149116
RPL14	0.148827
KIF5B	0.148825
TOR1AIP2	0.148516
PPARG	0.148061
MRPS6	0.14805
LSR	0.147214
FSCN1	0.147189
WEE1	0.147147
BCAT1	0.14676
RAPH1	0.146037
MCL1	0.145875
TRAF4	0.145605
RPN2	0.145089
MRPL57	0.145046
NR4A3	0.145039
CYFIP1	0.145026
RPL9	0.144723
GSDME	0.144579
SLC12A7	0.144447
ERVW-1	0.144248
GLDC	0.144025
RANBP1	0.143986
SPTAN1	0.143963
ITPRIPL2	0.1439
PDLIM1	0.143863
ARL8B	0.143844
EGFL7	0.143475
CBX3	0.14303
RBM8A	0.142816
LRP2	0.142742
ACSS1	0.142695
MFHAS1	0.142646
GADD45G	0.142508
LY6E	0.142163
TGIF1	0.142119
RPL30	0.141994
GATM	0.141963
SERBP1	0.141731
PDE4DIP	0.140556
NBL1	0.140454
ACBD3	0.140325
OLFML2B	0.13978
PRELID1	0.139669
JPT1	0.139664
ECHS1	0.139389
DSC3	0.139272
FEM1B	0.139084
KLF3	0.138922
DYNLL1	0.138724
HOMER1	0.138684
MAP1LC3B	0.138511
SLC43A2	0.138496
ADAMTSL4	0.138149
KDELR2	0.13813
CCDC88A	0.138116
UBE2L3	0.137776
FCGR2A	0.137623
GLUD1	0.137215
RPL23A	0.136582
RCOR1	0.136527
HBEGF	0.136514
USP36	0.136024
UQCR11	0.135676
MOB1B	0.135646
EMILIN2	0.135313
RUNX1	0.135282
TLE4	0.135259
ECI1	0.135244
SOCS1	0.134993
DLX5	0.134908
RPL29	0.134636
ARRDC3	0.134453
PTBP1	0.134196
CPEB4	0.134158
PABPC4	0.13405
KLF6	0.133597
COMT	0.133492
INTS6	0.133195
RPL22L1	0.133091
PEAK1	0.133077
FERMT2	0.133061
DEGS1	0.132973
RPL3	0.132917
VDAC1	0.132817
ERRFI1	0.132587
TMBIM6	0.132512
CFD	0.132496
PRPF40A	0.132486
DNAJC21	0.132454
DYNLL2	0.132387
GOLIM4	0.132386
SWAP70	0.132329
BUD23	0.132278
HNRNPA2B1	0.132204
USP14	0.132131
CLDN7	0.132067
BTG2	0.132007
RPS27	0.132003
SPRED1	0.131533
SMOX	0.131497
RPL27A	0.13116
ID3	0.130808
FAM184A	0.130725
RPS18	0.130715
PCBP1	0.130352
SPRY2	0.130299
GSPT1	0.13003
SRSF10	0.129892
SPART	0.129696
SF3B1	0.129682
EIF5A	0.129613
G3BP1	0.129546
PRDX2	0.129452
C2	0.129437
VSIG4	0.129399
RBMS1	0.129383
CENPX	0.129307
RPS3A	0.129267
RPLP1	0.129251
TPM4	0.129163
CCDC186	0.129109
MIDN	0.129014
CCDC47	0.128822
C1orf122	0.128662
SRGAP1	0.128261
ABCA1	0.128022
KRTAP3-1	0.127789
RAB2A	0.127579
CD109	0.127569
WLS	0.12726
SPPL2A	0.127126
ITPKB	0.127055
MALAT1	0.12694
CD86	0.126934
LTC4S	0.126824
CBARP	0.126821
CD14	0.126408
IDH1	0.126299
BHLHE41	0.126259
EIF4B	0.126213
GUK1	0.126114
MALT1	0.12599
WWP1	0.12596
CTTNBP2NL	0.125945
CCT2	0.125683
SLC1A5	0.125586
RPS13	0.12516
RPL26	0.1251
RCN1	0.124926
RBM25	0.124838
POLR2A	0.124792
TMEM8A	0.124783
IQGAP1	0.124732
CDKN2AIP	0.124604
KCNN4	0.124564
SMARCA2	0.124356
DAG1	0.124344
HOOK3	0.124261
POU2F2	0.124136
PARD6B	0.123993
RBBP7	0.123908
FAM20C	0.123732
RPL10A	0.123651
PRKX	0.123245
PSMA3	0.123224
ANKRD1	0.122937
ZSWIM6	0.122815
RPL18A	0.122694
LUZP1	0.122506
YWHAE	0.122219
SGK1	0.122176
CFLAR	0.122162
GLMP	0.12214
RPLP0	0.121414
RPS5	0.121409
LDHB	0.121199
SNX8	0.121146
ZFHX3	0.121017
ERVH48-1	0.120987
NFAT5	0.120968
H2AFZ	0.120655
PCBP2	0.120655
GDF15	0.120563
GRAMD2B	0.120485
MYLIP	0.120183
LAP3	0.120093
CTDSPL	0.119934
GNA15	0.119893
FAM57A	0.119612
MAP3K8	0.119449
45911	0.119364
SLC38A1	0.119156
CHML	0.118441
SLC9A9	0.118433
PSMD7	0.118173
ME1	0.118109
KLF2	0.118028
HILPDA	0.117986
ARL5B	0.117932
AP2A2	0.117672
HMGN2	0.117628
ETS2	0.11746
RPL21	0.11746
ARHGAP5	0.117387
TGFA	0.117331
KDSR	0.11732
RPS4X	0.117237
ZNF750	0.117193
AFF4	0.116916
SRSF11	0.116684
CCNE1	0.116438
PI4K2A	0.116405
PPA1	0.116286
SCN9A	0.116271
EIF2AK1	0.116208
SPP1	0.116069
JTB	0.116038
MUC20-OT1	0.116036
ELF1	0.116011
KHDRBS1	0.115985
IGFBP4	0.115887
SMIM26	0.115807
PPP1R14B	0.115777
COBLL1	0.115695
ITSN1	0.115639
SGMS1	0.115382
HINT1	0.114999
YWHAB	0.114996
SNX2	0.114728
CEP170	0.114675
PABPC1	0.11465
DSEL	0.114527
RPL11	0.114522
ELOB	0.114491
BMP2	0.114279
SLC22A11	0.114256
ZBTB43	0.11399
PPP2CA	0.113911
NENF	0.113862
CD74	0.113756
ANXA2	0.113731
BZW1	0.11366
CBX4	0.113611
NECTIN2	0.113582
PAPOLA	0.113573
MPC2	0.113329
LPAR6	0.113278
DDX17	0.113087
QKI	0.112756
SNRPF	0.112711
SNRPG	0.112654
VDAC2	0.112645
LRPAP1	0.112566
RPL10	0.112126
ATP1A1	0.112115
SYNE2	0.112113
FCGR3A	0.112026
HNRNPA3	0.111762
BAZ1A	0.111745
UNC93B1	0.111379
NAP1L1	0.111306
EPAS1	0.111242
SRRM1	0.111177
RNF19A	0.111048
NR2F2	0.111018
GGH	0.110987
ZCCHC2	0.110724
SUGT1	0.110378
MT-ND6	0.110081
AHSA1	0.109894
ARL6IP5	0.109618
RPL32	0.109576
BMP2K	0.1092
YWHAZ	0.109013
ADA2	0.108985
NEDD4L	0.108918
TMED4	0.108782
PAPSS2	0.108544
USP38	0.108445
SCARB2	0.108078
CCT5	0.107983
BCLAF1	0.107865
TOB2	0.10786
PUM1	0.107736
RPS27A	0.107593
ARF4	0.1074
TXNRD1	0.107359
RHBDF2	0.107202
MLEC	0.107155
GYPC	0.107044
HLA-DRA	0.106813
ADIRF	0.106641
NR4A2	0.106623
GADD45B	0.106601
RCAN1	0.106582
RPL6	0.106527
TPP1	0.106397
CD68	0.106281
TACC2	0.106234
FARP1	0.106227
EPS8L1	0.106097
CROT	0.105905
PAWR	0.105816
H2AFJ	0.105651
FTH1	0.105535
FDFT1	0.105451
LIMA1	0.105285
CABLES1	0.104797
FOXO4	0.104718
LEPROT	0.104643
ISCU	0.10463
C15orf48	0.1046
RPS15A	0.104569
FBN1	0.104441
HMGB1	0.104329
SPARCL1	0.104244
TRIM28	0.104081
PCDH12	0.104011
CCNI	0.10392
MSMO1	0.10384
PPP1R12B	0.1038
CCL2	0.103797
CASP3	0.103748
TMEM51	0.103707
LMAN1	0.103554
ALPK3	0.10347
PLEKHF1	0.103393
AKAP9	0.103342
RPL27	0.103291
CR1	0.10319
IPO7	0.103185
TPR	0.102911
PPP1R15A	0.102886
NFE2L2	0.102728
ETFA	0.102612
EPS8	0.102248
ATP6V1C2	0.102225
EPB41L4A-AS1	0.102155
UGP2	0.102154
EEF2	0.101984
TRIOBP	0.101923
PNN	0.10187
ATP6V0A1	0.101845
SPATS2L	0.101771
MRFAP1	0.101435
RPL4	0.101435
TMEM158	0.101408
RPS19	0.101402
COX7C	0.101259
FCGRT	0.101158
HNRNPR	0.101097
GAREM1	0.100728
SH3GLB2	0.100596
SNHG12	0.10051
CD34	0.100475
SERPINB9	0.100357
SAMD4A	0.100082
AHR	0.100048
HEATR3	0.099921
TJP1	0.0998918
IL6ST	0.0997776
CDH5	0.0995134
MRPS26	0.0994358
CCL4	0.0993284
SON	0.0992888
ELL2	0.099271
PPP1R10	0.0991545
PNRC1	0.0985446
USP12	0.0981177
RPL35	0.0976522
USP37	0.0976125
GLRX5	0.0976032
CTSD	0.0975823
PSMB2	0.097456
SBDS	0.0973685
CADM1	0.0973135
ACTN4	0.0971599
UBXN4	0.0970776
FCGR1A	0.0969609
DDX24	0.0969076
YES1	0.096873
HRH1	0.0967049
GNAI2	0.0967006
DSE	0.0966969
GJC1	0.0966586
APLNR	0.0965166
BAIAP2	0.0963282
ZBTB7A	0.0960912
PRDM1	0.0960213
BTF3	0.0959583
TCF25	0.095925
LRRC8C	0.0959141
RPL8	0.0957207
ATF6	0.0957173
SNX6	0.0957105
PGAM1	0.0955585
ZBTB10	0.0951927
PLXND1	0.0951818
ST6GAL1	0.0951764
PIM3	0.0946139
FCGBP	0.0945657
PPIB	0.0944542
SUZ12	0.0943186
PSMD8	0.0943018
YME1L1	0.0942965
ADAP2	0.094218
YWHAH	0.0940941
NORAD	0.0940888
UQCRB	0.0936936
EIF2S2	0.0936286
SLC7A8	0.0933701
RAMP2	0.0933207
CCDC50	0.0933073
GNA13	0.0932389
SLC39A1	0.0932307
CYTH1	0.0932283
CDK6	0.0931916
MS4A6A	0.0931392
CDO1	0.0930065
FABP4	0.0929921
CD2AP	0.0929281
CNBD2	0.092654
UCP2	0.0926314
SIRPA	0.09247
TMEM40	0.0924076
ECSCR	0.0923752
CCDC32	0.0923482
SOCS6	0.092323
HNRNPF	0.0917842
DHX36	0.0917831
AAED1	0.0917733
HNRNPC	0.0916935
MYOF	0.0916308
HADHB	0.0915241
KPNA4	0.091511
FOXK2	0.0913329
NEAT1	0.0913236
EIF3G	0.0912624
ATP5F1E	0.0912291
PSMB1	0.0910436
CCL5	0.0909752
BRD4	0.0909505
ZC3H15	0.0908562
STARD10	0.0908255
MAGED1	0.0907918
RPL28	0.0906481
HNRNPK	0.0905839
DOT1L	0.090531
INSL4	0.0905213
COX6C	0.0904151
MRPS34	0.090386
YTHDF2	0.0903144
PSMA5	0.0902703
SLC13A4	0.0902203
FCGR2B	0.0901349
PSAP	0.0897132
SELENOI	0.0897058
MEX3B	0.0894335
DDAH2	0.0893796
JUNB	0.0892092
SPTSSA	0.0892051
NUAK1	0.0889662
CHCHD2	0.0889231
VAPA	0.0888662
COPS9	0.0888548
RPS9	0.0888477
ST13	0.0887866
SMARCA5	0.0887553
VWF	0.0886625
ETF1	0.0884762
VEGFA	0.0881369
ZNF706	0.0880921
NSA2	0.0880584
DPP7	0.087995
CXCL3	0.0879942
IDO1	0.0879361
PDGFC	0.0879359
KHSRP	0.0879194
PPP1R15B	0.0875713
SERINC5	0.0874216
KRT23	0.0874157
AL392172.1	0.0873554
YWHAQ	0.0872799
TRA2B	0.0872167
AL359220.1	0.0871382
SND1	0.0870836
FNBP1L	0.0870644
CELF1	0.0869164
DICER1	0.0868147
NDFIP1	0.0867638
MMP19	0.0867262
MSI2	0.0866428
SYNCRIP	0.0864614
TBC1D9	0.0863775
TXNL1	0.0863196
OTULINL	0.0861468
ROR1	0.0860756
PHETA1	0.085822
SLC13A3	0.08569
DDOST	0.0856196
TLE1	0.0854584
CCT4	0.0854528
RPL15	0.0853893
NOL7	0.0853295
FMNL2	0.085324
PSIP1	0.0853129
HEXB	0.0852365
LSM8	0.0851497
REX1BD	0.0848638
KCNQ1	0.0848372
EPOP	0.0845362
CSDE1	0.0844319
ARIH1	0.0843331
TM4SF1	0.0842187
PPP2CB	0.0841214
RRP12	0.0840753
ZNF217	0.0840415
NFATC2	0.0839866
WASF2	0.0838388
DDB1	0.0838288
S100A10	0.083816
SNRPB	0.083688
ARID3A	0.083683
ATP2B1	0.083682
CTNND1	0.0836819
HSPA4	0.0835593
ATF4	0.0834361
PSMD1	0.0834291
FOXP1	0.0834287
AP1B1	0.0832198
EPHA2	0.0831669
AC011526.1	0.0831128
SRSF6	0.0830652
PELI1	0.0830113
CYBB	0.0829286
RGL1	0.0829221
RAB30	0.0828871
RPL12	0.0827034
COLGALT1	0.0825298
STAU1	0.0823999
KLF10	0.0823894
PGBD5	0.0823591
SLC19A2	0.0821855
CD55	0.0821636
TIPARP	0.0821596
UVRAG	0.0821153
PDGFA	0.0819972
KCNJ5	0.0819917
GLS	0.0819773
MEOX2	0.0819629
CTNNA1	0.0819093
LRRC8B	0.0818845
QPRT	0.0818537
RASL11B	0.0818296
GRAMD2A	0.0817709
TBCA	0.0817389
NCEH1	0.0811662
GABARAPL1	0.0811098
LGR4	0.0809805
ZFP36	0.0809725
C6orf62	0.0809034
ATP6AP1	0.0806696
CDC42	0.080547
SMARCA1	0.0805463
EIF5B	0.0804891
AREG	0.080386
TNFRSF4	0.0802558
HIST3H2A	0.0801007
EIF4H	0.0800769
HIF1A	0.0799379
VGLL1	0.0798532
SOX7	0.0798327
AC092718.6	0.0796676
TDRP	0.0796398
PSMB6	0.0795713
RPL17	0.0793813
RAB3IL1	0.0793304
TMEM88	0.0792715
MBD3	0.0791621
CBR1	0.0790493
BCL2L11	0.0789925
ICAM1	0.0789542
TMEM165	0.07893
ATG9B	0.0789105
FDPS	0.0788739
GGCT	0.0788726
PPFIBP1	0.0788605
STARD7	0.0787587
EDN1	0.0786365
CLTB	0.0785693
ZNF703	0.0785011
CH25H	0.0784865
C4orf48	0.0784305
M6PR	0.0784102
DRAM1	0.0783957
ORMDL1	0.0781387
MYO5A	0.0781013
RHOQ	0.0780096
PALMD	0.077943
GPR85	0.0779208
RPS14	0.0778736
COX20	0.0778089
SYT1	0.0777798
LY96	0.0777518
POLR2L	0.0777467
RBM3	0.0777399
KYNU	0.0776923
MET	0.0774985
USP2	0.0774598
ATF7IP2	0.0773333
FAM3B	0.077162
LAMB1	0.0769407
CHPT1	0.0768945
STIP1	0.0768541
HLA-DRB1	0.0767087
SLC25A25	0.0766413
EZH2	0.0766098
NDUFA10	0.0764049
KDM5B	0.0763968
PRR5	0.076338
SLC11A2	0.0763188
SHTN1	0.0763146
ERP29	0.07614
ERG28	0.0760438
PITPNB	0.0758449
DNMBP	0.0757904
PON2	0.0757357
ANKRD37	0.0757254
RAB20	0.075684
MTCH1	0.0755888
EGR1	0.0754266
HNRNPH3	0.0754232
PSMA1	0.0753967
RNF217	0.0752915
JAG1	0.0752146
SERPINH1	0.0751136
PER3	0.0750914
NRROS	0.0750474
TRIM47	0.0749763
SLC6A4	0.0749618
PHB2	0.0748184
SIPA1L2	0.0746084
NOP56	0.0744817
AURKAIP1	0.0744749
GPR34	0.0743561
PTGER4	0.0742763
NLRP3	0.0742405
WDR91	0.0742153
EFNA1	0.0741788
PDCD6	0.0741782
LYPD3	0.0740741
TNFRSF1B	0.0740343
RPLP2	0.074016
STS	0.0739707
PISD	0.0739353
VGLL3	0.0738927
EFR3A	0.0738814
PDE4A	0.0738178
TLR7	0.073804
NDUFV2	0.0737798
IGSF21	0.0736753
PLCXD1	0.0736184
ECI2	0.0733606
RPL36A	0.0733464
UBE2D1	0.0732722
CXCL16	0.0732404
FOXI3	0.0732375
CD59	0.0731537
SPEN	0.073124
PLEKHG2	0.0730038
ANKRD12	0.0728095
KDR	0.0727814
AGL	0.0726118
H3F3A	0.0723551
GNA12	0.0722888
DSTN	0.0721595
ARPC5L	0.0721123
CENPF	0.0720832
NUCKS1	0.072028
HYAL2	0.0720049
CCT8	0.0717834
PHF20	0.0717297
AVPI1	0.0716495
ENY2	0.0714931
RBM17	0.0714583
P4HA1	0.0713635
SAP18	0.0712551
WTAP	0.0711903
BBX	0.0710585
NACA	0.0710129
STARD4	0.0709472
SLC20A2	0.0709035
WARS	0.0708843
FRMD8	0.0708547
ETNK1	0.0708494
TSPAN3	0.0706956
APLN	0.0706691
KRTAP2-3	0.0705574
BORCS7	0.070402
SAMHD1	0.0703551
MCOLN1	0.0703158
ROBO4	0.0703018
PHLDB1	0.070284
KRT18	0.0701617
CMTM8	0.0700398
RPS3	0.0699155
S1PR1	0.0698588
OGT	0.0697617
TGFBI	0.0695796
ZBTB4	0.0695439
TM4SF18	0.0693403
FAM26D	0.0691465
DEPP1	0.0690746
ATRX	0.0690103
ADAM10	0.0689702
SLC40A1	0.0688922
DNAJB9	0.0688508
AKR7A2	0.0688379
MACF1	0.0687917
NDUFB2	0.0687589
ICAM2	0.0687485
MRPL18	0.068694
SKP1	0.0686453
ELOVL4	0.0685899
BEX4	0.0685508
ST3GAL5	0.0685133
UBAP2	0.0683455
PLEKHB2	0.0682661
NAA50	0.0681257
GRB2	0.0680397
GRN	0.067892
PGAP1	0.0676944
SMC3	0.0676595
TNS3	0.0676226
HS3ST1	0.0675721
DPYSL2	0.0675572
SLFN11	0.0673018
GPX4	0.06728
MMRN1	0.0672538
SCN1B	0.067226
ZMIZ1	0.0670462
NNAT	0.0670338
PIK3C2A	0.0669982
PART1	0.0669091
MAPRE2	0.0668778
EGR2	0.0668515
NR1D2	0.0668372
STARD13	0.0667646
GPR42	0.0667419
ZNF451	0.0666125
PPARD	0.0665347
UBA52	0.0664894
IL1RN	0.0664517
AK6	0.0663245
CXCL2	0.0662599
HEBP2	0.06624
HP1BP3	0.066222
CHCHD10	0.066172
EIF1B	0.0660946
ATP6AP2	0.0659245
NDUFAB1	0.0658295
ZFAND2A	0.0652915
MTUS1	0.0652883
PSMA7	0.0651818
PIAS2	0.065047
CD300LG	0.0648788
PFN1	0.0647549
RPL34	0.0646713
EPS15	0.0646082
PYURF	0.0645217
TCF4	0.0645203
YPEL3	0.0645195
RPS6	0.0645118
OCLN	0.064509
TMEM14C	0.0644794
LARP4	0.064386
MAP7D1	0.0643692
LGI2	0.064336
HADHA	0.0642943
DDX21	0.0642228
FNBP4	0.0642003
CRTAP	0.0641052
GRK3	0.0640285
PLD3	0.0640046
RPIA	0.0639216
TNNT3	0.0639169
KBTBD8	0.0638589
BIN1	0.063814
SLC30A1	0.0637689
NOTCH1	0.0637456
GRIN2C	0.0636861
TNFSF9	0.063683
EIF2AK3	0.0636242
TYMS	0.063579
PTPRB	0.0635716
SUMO2	0.0635618
CAMK2G	0.0634943
TFEC	0.063378
BRD7	0.0633564
CD93	0.0633102
ATF5	0.0632879
RAB7A	0.0631337
CYC1	0.0630469
DST	0.0630286
CXorf36	0.0629665
NECTIN4	0.0629533
ARID1B	0.0627191
TRAM1	0.0627067
CLN8	0.0626989
LSM7	0.0626959
ELK3	0.0626427
SDF2L1	0.0626239
SEC11A	0.0625673
TSPAN33	0.0624765
PSMB4	0.062279
FJX1	0.0622755
CD180	0.0622129
TSHZ3	0.0621343
EIF4G1	0.0619825
SRGAP2C	0.0618663
PDGFB	0.0618554
BCL2	0.0618338
VPS13C	0.0618314
TESK1	0.0618097
TMSB10	0.0617273
AKIRIN1	0.061634
TLR2	0.0615521
SKP2	0.061464
PSMD12	0.061445
PLVAP	0.0614296
SDF4	0.0613771
NRN1	0.0613481
SERP1	0.0613439
PHACTR4	0.0613422
UBAC1	0.0612317
CAV1	0.061134
THRAP3	0.0611062
RSRP1	0.061091
HIVEP2	0.061048
DIAPH2	0.0610286
FAM133B	0.0609035
SLC9A1	0.0608586
FEZ2	0.0607787
CHST7	0.0607479
SCAF11	0.0606627
EFNB2	0.0606526
NANOS1	0.06064
RPS26	0.0604934
MT-ATP8	0.0604051
SOAT1	0.0603622
HPGDS	0.0603273
GALNT1	0.0602525
HMGCR	0.060248
PDIA4	0.0602398
PRPF4B	0.0600904
MCTP1	0.0599516
NPTN	0.0599352
CCSAP	0.0599103
GNG11	0.0598629
EIF3E	0.0597095
MIF	0.0596661
CYB5A	0.059649
RNF145	0.0595821
KRT10	0.0595793
ZFAS1	0.0595652
HDLBP	0.0595084
ZNF638	0.0594935
STXBP6	0.0593879
MINDY2	0.059324
TNFAIP8L3	0.0592482
MAMDC2	0.0591625
NXN	0.0591052
IL32	0.0590484
CNDP2	0.0590464
HOXB6	0.0590215
KRT8	0.0590048
C8orf59	0.0588315
PRSS22	0.058792
CMTM6	0.0587344
SCAMP2	0.0586956
HIVEP3	0.058561
CCR1	0.0584577
BPTF	0.058174
RCC2	0.0580986
YTHDC1	0.0580427
GTF2A2	0.0578971
CALD1	0.0578966
GLA	0.0578774
TIE1	0.057756
RABEP1	0.0575783
PMEPA1	0.0575387
ESAM	0.0575039
HEXA	0.0572116
AC016831.5	0.0571953
ILF2	0.0571852
RPL35A	0.0571212
TFPI2	0.0571063
FCN3	0.0570969
C1orf54	0.0570785
SSB	0.0570059
IGF2BP3	0.0569399
ESRRA	0.0569328
FAM129B	0.0569135
NET1	0.0568376
CD163L1	0.0568014
SEPHS2	0.0567718
EPB41L1	0.0567316
RER1	0.0567186
TGFBR2	0.0566223
SASH1	0.0565589
SLC25A36	0.0563729
HS3ST2	0.0563126
FFAR3	0.056222
XRCC6	0.0561798
ABR	0.0561476
CPE	0.0560737
SNRNP70	0.0558371
ACSL1	0.0558224
APOLD1	0.0558206
UBE3A	0.0557786
ABHD8	0.055742
LGR5	0.0556645
PIK3AP1	0.0556245
SH3YL1	0.0555457
PURA	0.055478
AP2S1	0.0554652
NDUFS6	0.0554375
SDPR	0.0553842
SLC17A5	0.0553797
KIF1B	0.0553215
EIF3J	0.0553214
SDS	0.055291
PAGE2	0.0551939
MMRN2	0.0551285
AHCYL1	0.0550541
MYCT1	0.0550277
GCNT2	0.0549425
PARVB	0.0549281
MCUB	0.0549024
MIR155HG	0.0548777
WIPI2	0.0548161
HLX	0.0547786
GPR116	0.0547061
MTRNR2L12	0.0546978
MCFD2	0.0546754
KANK1	0.0546736
EXTL2	0.0546545
PLA2G16	0.0546381
ELOA	0.0544126
CALU	0.0543162
OGFRL1	0.0543028
IL27RA	0.0542884
CREB3L2	0.0541659
TM2D2	0.0540547
KLF16	0.0540269
CCT3	0.0539989
ATP10D	0.0539821
RAB11A	0.0539246
SCARB1	0.0539103
EID1	0.0538381
RAP1B	0.0538234
BMPR2	0.0537773
ABLIM3	0.0537691
CALM2	0.0536891
SEC61B	0.0536516
CHMP1B	0.0536036
HCST	0.0534862
ZBTB1	0.0534761
ITGB4	0.0534442
XPO1	0.0533923
NSG1	0.0532704
GNS	0.0530686
DTNA	0.0530259
FAM43A	0.0529351
TOP2A	0.0526991
P3H2	0.0526562
YAP1	0.0525778
POM121	0.0525409
PMP22	0.0525188
ARHGAP29	0.0524847
UBE2J1	0.0524807
SPIRE1	0.0524033
SOWAHC	0.0522935
IDO2	0.0522649
B3GNT5	0.0521542
BNIP3	0.0520638
DKK2	0.0520462
ZHX2	0.0519858
CLIC4	0.0519251
ADCY4	0.0519026
FOXO1	0.0518488
EIF4A2	0.0518281
NDUFAF8	0.0516929
TAOK3	0.0516762
PSMB5	0.0516176
SMC4	0.051335
RP11-536O18.1	0.0513211
GCLC	0.0512925
IL33	0.051292
RDH10	0.0512285
TENT5B	0.0511328
ESYT2	0.0511228
HTATSF1	0.0510706
PLEKHG5	0.0509099
SHE	0.0509081
ARHGAP6	0.0508509
ASPM	0.050728
MFAP1	0.0506701
FYTTD1	0.0506168
PPIG	0.050582
DDIT4L	0.0505025
RPS15	0.0504954
BST2	0.0504943
LRP1	0.0504937
KIF23	0.0504883
GNG12	0.0503402
SHROOM1	0.050253
TM9SF3	0.050227
DIRC2	0.050073
MXD4	0.0500712
KIAA1217	0.0500534
LAMA5	0.0500364
TNFAIP8	0.050001
FIS1	0.0499553
RPS20	0.0499109
IRF8	0.0498442
RSAD2	0.0498125
NSD3	0.0498117
TUFM	0.0497571
OLR1	0.0497324
HIKESHI	0.0497308
LARGE1	0.0497259
HIPK3	0.049664
GIMAP7	0.0496237
HECTD1	0.049606
NDUFC2	0.0495512
PDCD4	0.0493958
CDCP1	0.0493678
PCNX4	0.0493035
GSTP1	0.0491576
PSMD2	0.049153
ARC	0.0490775
KCTD5	0.0488418
PBX1	0.0488365
NOSTRIN	0.0487706
MAST4	0.0486631
MAGED2	0.048653
CDK7	0.0486456
STOM	0.0486048
EIF3K	0.0485547
CXCL12	0.0485462
VPS53	0.0485256
NOTCH4	0.0484325
RRAGC	0.0484037
COX4I1	0.0483746
RBBP8	0.0483425
SMIM13	0.0483121
HRAS	0.0483014
KIAA1462	0.0482749
CDK2AP2	0.0480886
NRARP	0.0480323
PPFIA1	0.0480219
ITM2A	0.0479629
CYYR1	0.0479033
P2RX7	0.0478802
ARF1	0.0478616
TBC1D4	0.0478446
PSMD3	0.0478199
CCNDBP1	0.0478024
KLF11	0.0477186
KDM2B	0.0476178
ACKR1	0.0476088
CFAP97	0.0475709
ARHGAP31	0.0475525
WWC1	0.0475032
GPRIN3	0.0474643
CD302	0.0473802
RP11-417J8.6	0.0472637
RAB31	0.0471791
CLEC3B	0.047135
LARP1B	0.0471215
SRSF8	0.0471027
SMAD7	0.0470806
SOD3	0.0470712
SELE	0.0469613
TP53I13	0.0469571
KL	0.0469197
CFL1	0.0469121
GTPBP4	0.046904
PLEKHA2	0.0468409
NPL	0.046789
NREP	0.0467762
UAP1	0.046703
KATNA1	0.0466559
TRA2A	0.0466481
HOXB2	0.0466198
FAU	0.046512
PRAG1	0.0465083
ADGRG6	0.0464075
RAMP3	0.0463067
FGD5	0.0462948
MORF4L1	0.0462591
RRAGA	0.046231
SLC8B1	0.0461098
SDCBP	0.0461014
PLA1A	0.0460791
JARID2	0.0460606
EPHX1	0.0460037
RNF130	0.0459622
DOCK9	0.0458594
BLVRB	0.0458498
CRHBP	0.0456238
MFSD12	0.0456236
ICE1	0.0456215
ST3GAL1	0.0455698
IMP3	0.0455268
TMED7	0.0454334
PLK3	0.0454115
CCDC80	0.0454
AC025263.1	0.0453233
RB1	0.0453183
SAV1	0.0452628
PHLDA1	0.0451821
COX8A	0.0451416
MYORG	0.0451176
ENG	0.0449613
RASSF4	0.0449361
DUT	0.0448972
TOR3A	0.0447687
ORC6	0.044709
TMOD3	0.0446193
NDUFA13	0.0446185
ARHGEF10L	0.0445952
PSMD14	0.044448
FCHSD2	0.0444462
FBXO11	0.044404
AP2M1	0.044403
RNH1	0.0443719
LZTS2	0.044277
PANX1	0.044162
NSMCE3	0.0440761
SNHG7	0.0440527
JAM3	0.044024
OAT	0.0440091
NIPSNAP2	0.0439767
MLF1	0.043973
PRDX6	0.0439067
CACYBP	0.0438967
SLC9A3R2	0.043804
CUX1	0.0437373
ETV3	0.0436817
SLC52A1	0.0436813
ABCC1	0.0436662
NUSAP1	0.0436469
TMEM243	0.0435945
RP11-782C8.5	0.0435158
MSRB2	0.0434482
SNRPE	0.043445
FAM107A	0.0434075
CLDN5	0.0433705
RAB9A	0.0433604
COX7B	0.0433495
RASA3	0.0432939
GLG1	0.0432554
HLA-DPA1	0.0432315
HSBP1L1	0.0431052
JUP	0.0431047
PLEKHF2	0.0430879
TMEM259	0.042994
NFIC	0.042868
METAP2	0.042832
TSPAN7	0.0428187
MAGT1	0.0427784
HOMER3	0.0425979
ERG	0.042592
NCOA4	0.0425826
NETO2	0.0425731
OTULIN	0.0425276
PSMB7	0.0424815
MATK	0.0424747
RASSF8	0.0424671
SOCS3	0.042405
PSMC4	0.0422949
CETP	0.0422374
NPPC	0.0421337
AC010980.2	0.0420672
FGFR1	0.0420329
FAM241A	0.0419303
LGALS9	0.0418821
B3GNT2	0.0417969
PSMC6	0.0417691
HEY1	0.0417415
FUT1	0.0415979
ATP13A3	0.0414045
SUCO	0.0413805
EXOC6	0.0413545
PLA2G15	0.0413074
TAL1	0.04127
IL10RA	0.0411967
YTHDC2	0.0411762
SMC1A	0.0410668
GAPLINC	0.0410663
RUFY1	0.0410513
NFKBIE	0.0409851
EI24	0.0409517
FP565260.3	0.04092
ECH1	0.0409145
CAMSAP2	0.0407954
TMEM100	0.0407835
TCF12	0.0406805
ROCK2	0.0406679
CD276	0.0405249
ACVRL1	0.0404585
MRPL4	0.0404183
SGPP1	0.0403668
UQCRH	0.0403295
RC3H1	0.0402945
PLEKHA1	0.040294
PLD4	0.0402717
AC058791.1	0.0401948
LRRC36	0.0401893
FAM167B	0.0401735
ADH5	0.0400165
RBPJ	0.0398779
FAM102B	0.039801
ZNF326	0.0397811
PCOLCE2	0.0397793
PSMA4	0.0396773
SLC8A1	0.0395694
ZBED3-AS1	0.039529
UBE2M	0.0394781
MAML2	0.039425
STARD8	0.0393889
UBE2D3	0.0393474
ZC3H12C	0.0392828
HLA-DQB1	0.0392771
HIC1	0.0392434
EVA1B	0.0392046
HSPA6	0.0391682
PRMT1	0.0391608
ARFGAP3	0.0391551
NMRK2	0.0390248
HAS1	0.038972
TEK	0.038971
ADAMTS1	0.0387731
VCL	0.0387426
EREG	0.0387134
ATXN2	0.038703
H2AFY	0.0386327
PDE8A	0.0386066
RAPGEF5	0.0385549
RASIP1	0.038491
CBR3	0.0384898
TAX1BP1	0.0384459
PLA2G4C	0.0384434
TRAPPC3L	0.0383598
MEF2A	0.0383549
GAS2L3	0.0382557
C17orf58	0.0382004
GRB14	0.0381523
ZMYM2	0.0381518
MKNK1	0.0381454
EIF4G3	0.0381077
MED13	0.0380345
CENPE	0.0379677
SNRPD1	0.0379594
UBE2B	0.0379223
SURF4	0.0378495
CGNL1	0.0378399
PIP5K1A	0.03779
EMP2	0.0377607
ATP6V1G1	0.0377552
FAM111B	0.0376212
HLA-DMA	0.0375892
PECAM1	0.0375858
SELP	0.0375616
PICALM	0.0374616
ARHGAP4	0.0374283
ATXN7L3B	0.0374156
FXR1	0.0373564
DLC1	0.0373467
DNAJC8	0.0373386
CHD4	0.0373077
SVEP1	0.0372302
NOCT	0.0372172
NCOA7	0.0371782
KDELR1	0.0371271
HIST1H2BG	0.0370951
BBS5	0.0370572
CNRIP1	0.0370375
SELENON	0.0369097
RPL13A	0.0368992
AC110995.1	0.0368952
XAF1	0.0368929
GTF2I	0.0368782
C1QTNF9	0.0368293
TAC1	0.0368107
UBE2A	0.0367642
VMO1	0.0366888
PODXL	0.0366877
FRMD4B	0.0366004
FMN1	0.036557
PFDN2	0.0365529
CLDN11	0.0365266
IL1A	0.0365209
LARP1	0.0364497
MPZL1	0.0363553
XIRP1	0.0363457
USP53	0.0362752
SLC4A7	0.036235
NBDY	0.0362333
DENND4A	0.0362273
HGSNAT	0.0362217
THAP12	0.0362159
ACBD6	0.0362085
EEPD1	0.0361768
PDCD1	0.0361229
RTF1	0.0360432
TSPAN18	0.0359981
ENPEP	0.03594
S1PR2	0.0358991
GNB4	0.0357919
HMMR	0.035787
TRIP11	0.0356319
KRT19	0.0355153
KANK3	0.0354809
OGDH	0.0354101
GIPC2	0.035406
TRPS1	0.0353477
DPP4	0.0353087
AC100849.1	0.0352974
COX7A1	0.0352518
STX2	0.0351858
OTUD4	0.0351689
DLG5	0.0351248
SSH1	0.0350603
IL6R	0.0350518
PRKAR1A	0.035035
TNFRSF21	0.0349759
IL13RA1	0.0349513
DUSP4	0.0349448
SH3BGRL	0.0349222
ARL6IP4	0.0349181
GBP4	0.0349117
IFI44L	0.0348959
PDCD5	0.0348672
SMIM3	0.0348529
GIMAP6	0.0347849
SH3RF3-AS1	0.0347526
CSNK1E	0.0347121
AFF1	0.0346872
ARL4D	0.0346623
PHLDA3	0.0346372
CYP1B1	0.0345973
TRIM44	0.0345467
FKBP5	0.0345456
NCK2	0.0345266
CD72	0.0344412
SOBP	0.0344369
DIAPH3	0.0344119
CFAP298	0.0344076
TAF4B	0.0344028
SLC16A1-AS1	0.0343541
ABHD3	0.03434
PPP1CB	0.0343329
EFCAB14	0.0343213
CAVIN2	0.0342804
SRP14	0.0342562
CYB5R1	0.0341787
TRIM36	0.0341351
NCKAP5	0.0340626
LSM4	0.0340603
CD36	0.0340475
MRPL14	0.0339918
ARHGEF15	0.0338809
ZBED3	0.0338581
NCKAP1L	0.0338236
ABCA6	0.0338155
FAM101B	0.0337738
KIFC3	0.033685
SESN2	0.0336307
NAV3	0.0335196
UBE2D2	0.0334766
ADGRL4	0.033468
ASAP2	0.0334411
FAM78A	0.0334314
NECTIN3	0.0333747
ZFX	0.033367
ATRAID	0.0333294
TUT4	0.0333074
PA2G4	0.0332938
TRIM29	0.033293
CCNB1	0.0332459
SPCS2	0.0332358
BDP1	0.0332016
ECPAS	0.0331622
LPHN2	0.033159
TRMT112	0.0331077
LDB2	0.0330987
IER3IP1	0.0330722
UQCRQ	0.0330513
NUP62	0.0329491
C8orf4	0.0329269
MUC15	0.0328674
FAM213A	0.0328641
REEP3	0.0328441
NCBP3	0.0328106
EIF4A1	0.0328073
ELTD1	0.03276
SLC38A11	0.0327581
EIF3L	0.032687
ARRDC4	0.032667
PTPN14	0.0326107
ABHD17A	0.0326014
EML4	0.0325616
CD164	0.0325337
PNPLA8	0.0325191
PPM1G	0.0324425
HLA-DMB	0.0321271
NDNF	0.0321271
IFRD1	0.032078
BRI3	0.0320607
TOMM7	0.0320182
RHOJ	0.0319238
PLXNA2	0.0319205
AGPS	0.0318399
SGSM1	0.0318125
HELLS	0.0318014
NEU4	0.0317663
ABCF1	0.0317503
LRP6	0.0316526
EPB41L2	0.0316274
SMIM30	0.0316178
[truncated: 21,340 more rows]

## Sheet: Retained_Placenta_cow_Pvalue
Retained Placenta Merged celltype pvalue
celltype	pvalue
Endo	1.6776e-12
VSMC	1.83669e-12
Monocyte	2.2432e-09
Macrophage	4.37086e-09
Tro_U4	5.74498e-09
Tro_U3	6.5865e-07
GECs	1.37061e-06
Fibs	3.33701e-05
Erythrocyte	0.00534058
Tro_B6	0.0361118
IFNT+Tro_1	0.136021
Tro_B5	0.171527
Tro_U1	0.201064
LEs	0.218413
Epiblast	0.234461
Mes	0.260892
Tro_U2	0.263177
Hypoblast	0.271798
Urothelial Epi	0.315551
Mural TE	0.319505
Tro_B2	0.359866
Tro_B4	0.377667
IFNT+Tro_2	0.394095
Tro_B3	0.441891
Polar TE	0.464384
Tro_B1	0.499471

## Sheet: Retained_Placenta_human_PCC
Retained_Placenta_human_gene PCC
	PCC
MT-ND5	0.480712
COLEC12	0.464891
MT-CYB	0.446121
MT-CO1	0.44119
SELENOP	0.435945
MT-ND2	0.433622
HSPD1	0.431817
MT-ND4	0.430001
MT-ATP6	0.428836
HSP90AB1	0.422673
HMOX1	0.421588
LMNA	0.420331
CLTA	0.420165
ATP1B3	0.417711
MT-ND3	0.417583
HSP90AA1	0.416978
MT-ND1	0.411242
CST3	0.407181
RACK1	0.405762
SLC25A6	0.405138
MT-CO3	0.400958
TINAGL1	0.397282
TCAF1	0.395883
MT-CO2	0.395323
RPS2	0.390415
TCEAL9	0.388557
HSPA8	0.386989
GNAS	0.385487
BEX3	0.384717
CEMIP2	0.384097
HSPH1	0.383018
EEF1A1	0.379397
ITGB1	0.379161
CAVIN1	0.376613
NRP1	0.373716
ADGRG1	0.373198
ATP5F1B	0.372468
HSPA5	0.370765
MRC1	0.369728
KLF4	0.365206
SPINT1	0.364575
RHOB	0.363906
JUN	0.359903
NFE2L3	0.357238
TACSTD2	0.355903
TENT5A	0.353811
XAGE2	0.350026
YBX1	0.349346
SELENOH	0.345617
CTNNB1	0.345175
HSD17B1	0.343888
ATF3	0.343048
BTG3	0.342323
ARL4C	0.341849
JUND	0.341526
MESD	0.341038
DNAJA1	0.340815
ARL4A	0.340675
SFPQ	0.340591
APLP2	0.340532
VWA1	0.340524
PHLDA2	0.339186
AL121944.1	0.338402
MYDGF	0.336573
HSPE1	0.335872
CEBPD	0.335212
DUSP9	0.334406
ATP5F1C	0.333796
MORC4	0.331447
NRP2	0.329754
ATP5F1A	0.329017
PEG10	0.32782
MSX2	0.327325
GADD45A	0.327235
BCAM	0.327224
EIF4A3	0.327136
NR4A1	0.327112
PERP	0.324583
CKS2	0.323679
SEM1	0.320961
IDI1	0.319042
NCL	0.314324
DUSP5	0.3143
CALR	0.314082
YBX3	0.31377
TFRC	0.312271
NUFIP2	0.311467
MT-ND4L	0.311402
SRSF2	0.311224
ATP5MC3	0.310859
FAM89A	0.310175
TUSC3	0.309622
RPL13	0.309226
HSP90B1	0.30771
EGFR	0.306241
EEA1	0.305099
PDIA3	0.304746
DNAJB4	0.304144
ATP1B1	0.303865
MLLT1	0.302801
EIF3A	0.301898
DSP	0.301722
TUBA1C	0.301571
TUBB4B	0.301252
DYNC1H1	0.301139
SARAF	0.298723
ATP5PF	0.298524
ATP5MF	0.297781
RTRAF	0.297409
SELENOK	0.296523
RPL22	0.295332
NUDT4	0.295179
PMAIP1	0.294329
RPS17	0.294318
RPS29	0.293807
EIF1AX	0.293605
RPL41	0.293579
FNIP2	0.293389
APP	0.293117
MDM2	0.292366
RBM47	0.291554
ITGA6	0.290556
NCOA3	0.289658
CD81	0.289518
SQSTM1	0.288011
ATP5MC2	0.286475
F13A1	0.286368
HMGA1	0.285888
NASP	0.285775
HACD3	0.285747
ZNF165	0.285262
LYVE1	0.285057
ELOC	0.285008
BAG3	0.284783
ANKH	0.284233
H2AFX	0.283712
CD163	0.283193
CRIM1	0.282366
ATP5MG	0.281797
HSPA1B	0.280713
KLF5	0.280425
PSMC1	0.280225
CDV3	0.279839
ACADVL	0.279686
PEG3	0.279401
NOP53	0.278565
RPS21	0.27784
SERTAD1	0.275945
FABP5	0.27539
SH2B3	0.274599
PTMS	0.274194
HNRNPAB	0.274027
PNP	0.273951
TINCR	0.273587
SET	0.271542
HSPA1A	0.271109
PLIN2	0.27071
GCSH	0.270603
IER5	0.269906
B4GALT1	0.269427
RPL37A	0.26898
CD84	0.268452
L1TD1	0.267677
CYCS	0.267443
PSMA2	0.267122
KTN1	0.266957
MAFB	0.266675
MYC	0.265293
INSIG1	0.265079
CD83	0.264326
SLC27A2	0.263209
RASGEF1B	0.262135
FBN2	0.261869
SLCO2B1	0.261819
DEK	0.261564
ATP5PO	0.261278
C1QBP	0.260815
CTSZ	0.260338
UBB	0.259905
EIF5	0.259728
TTYH3	0.259719
ZFAND5	0.257199
PKIB	0.257
WSB1	0.256938
DNAJB1	0.256684
CTSC	0.256331
FAM198B	0.254965
NRIP1	0.254319
MS4A7	0.254189
RCN2	0.254141
DAB2	0.252244
ISYNA1	0.25204
CDH1	0.251954
GPR183	0.251801
LGMN	0.251734
CREG1	0.250721
ATP5F1D	0.25031
SLC3A2	0.248962
FDX1	0.248595
FOXC1	0.248579
CLDN4	0.247311
SLC26A2	0.247004
CRYBG1	0.246294
DNMT1	0.246131
RAC1	0.245717
EIF3F	0.244908
PTPN1	0.244297
HNRNPU	0.243879
FAM20A	0.243457
VCP	0.243087
IER2	0.24171
EZR	0.241485
YWHAG	0.241258
XIST	0.241131
IRX2	0.240328
PPIA	0.240269
ID4	0.23999
DDX5	0.239596
DSC2	0.239381
CTSL	0.23876
SNU13	0.238251
IFI6	0.236941
PARP1	0.23693
FAM84A	0.236882
CD209	0.236836
PIK3R1	0.236588
SMS	0.23464
RBBP6	0.234627
PLEKHO1	0.234229
CSF2RA	0.234093
DUSP14	0.23373
ELF3	0.233388
MAFF	0.232896
CSF1R	0.232802
ATP2A2	0.232385
CD99	0.231807
RPL39	0.231603
CITED2	0.231446
PLK2	0.231321
SIGLEC1	0.230855
ATP5IF1	0.230417
PDK4	0.2303
CD47	0.230249
TLNRD1	0.230188
SLC2A1	0.229975
PNRC2	0.229845
SNHG8	0.229715
CD24	0.229545
RPL23	0.229366
ARG2	0.229074
XBP1	0.228787
GOLGB1	0.228441
TOP1	0.228255
ID1	0.228025
TPST2	0.227622
TRIR	0.227524
EPB41L3	0.22745
ARF6	0.227427
STAB1	0.227077
GTF2B	0.226261
RPL37	0.225919
SNX9	0.225642
KCTD12	0.225514
RAB7B	0.224868
CD4	0.224816
AMD1	0.22464
SNX3	0.223825
ITGAV	0.22372
HSPB1	0.223619
TENM3	0.222561
CLIC3	0.222361
TFDP2	0.222094
TAF1D	0.222037
SRSF9	0.221864
DNAJA4	0.221628
ITIH5	0.220978
SLC38A2	0.220756
METRNL	0.220695
TNFRSF12A	0.220414
A2M	0.219834
TBX3	0.219796
HMGN1	0.219793
ARL6IP1	0.218722
LARGE2	0.218569
RPL38	0.218485
TSC22D2	0.217227
CTSV	0.217104
RNASE1	0.217025
COX5A	0.216824
HAVCR2	0.216538
AKAP13	0.21628
CAST	0.215868
TOB1	0.215537
DBI	0.215265
PDIA6	0.21497
HEXIM1	0.214875
DDX3X	0.214774
CANX	0.213328
MBNL3	0.213046
DDIT3	0.21301
HIST1H4C	0.212777
RHOV	0.21213
RND3	0.212045
LMO4	0.211986
TACC1	0.211604
P4HB	0.2112
SRRM2	0.211106
FOSB	0.210929
HNRNPDL	0.210127
ABL2	0.209973
MIR22HG	0.209609
BTG1	0.208789
CALM1	0.207989
SEMA6A	0.207909
ANXA5	0.207645
SOX4	0.207606
ATP5MPL	0.207471
CTNNAL1	0.20668
MTSS1	0.206566
NR2F6	0.205988
LILRB5	0.20574
RGCC	0.205639
SPINT2	0.205482
SELENOF	0.205258
ARID5B	0.204818
RPS16	0.204565
SLC16A10	0.204056
RPS11	0.203376
MEF2C	0.203319
IQGAP2	0.203216
NDUFB8	0.203124
CCL4L2	0.203099
DNAJB6	0.202888
SIAH2	0.202537
MAT2A	0.202323
IER5L	0.20218
CYR61	0.201668
ARHGAP18	0.201436
SLC25A3	0.201293
SCIN	0.199867
AHNAK	0.199752
RIPOR1	0.199259
PITHD1	0.199128
ID2	0.199048
UBE2H	0.198843
GALNT11	0.198695
SMAGP	0.198485
FKBP4	0.198144
RHOBTB3	0.19747
RPL7A	0.197424
ITGB5	0.197388
RAP2B	0.197125
MPP1	0.196873
LAIR1	0.196758
MITF	0.196505
ITPR2	0.19639
NPM1	0.196299
CDKN1A	0.195935
CLIP1	0.195907
CEBPB	0.1959
SLC20A1	0.195665
EHD4	0.195198
RPS12	0.195015
THBD	0.195012
RHEB	0.194981
UBE2S	0.19486
SINHCAF	0.194145
EFEMP1	0.193995
HNRNPD	0.193883
RPS25	0.193307
ANP32B	0.193144
ATP5PD	0.192975
ANXA1	0.192955
CFAP20	0.192721
MPEG1	0.192601
TPT1	0.19128
SLC5A3	0.191047
RHOU	0.190999
ADI1	0.190973
MYH10	0.190502
PLTP	0.190499
FUCA1	0.190401
CCNL1	0.190246
SELENOT	0.190019
MME	0.18985
RBM39	0.189768
BAG1	0.189562
CLDN3	0.189495
RETREG1	0.18946
TRAF5	0.189157
EMP1	0.189127
PRDX1	0.189114
AAK1	0.189014
LCMT1-AS2	0.188846
RTN4	0.188684
BRD2	0.188444
PEBP1	0.188293
TFAP2A	0.188126
MANF	0.187934
PRRC2C	0.187597
OVOL1	0.187436
DUSP1	0.187341
SELENOS	0.187278
RASA1	0.186665
HERPUD1	0.186528
ALDH7A1	0.186468
GOLGA4	0.185902
RSRC2	0.185786
HSPB8	0.185305
RPS28	0.184531
CEBPA	0.184228
IDH2	0.183731
RPS24	0.183704
LFNG	0.183024
KPNA2	0.182695
UBC	0.18255
PAGE4	0.181958
SIAH1	0.181335
NFKBIA	0.181183
RPL5	0.180817
EIF4E	0.180349
CHSY1	0.18028
HNRNPM	0.180086
EEF1B2	0.178977
ATP5MC1	0.178133
RIMKLB	0.178128
MSR1	0.17709
LHFPL2	0.176881
SRSF3	0.17613
RANBP2	0.175896
UTRN	0.175718
CHORDC1	0.175508
TNFRSF11A	0.175504
FUS	0.175499
GPR137B	0.175275
PSMD11	0.174642
PTGES3	0.17453
UQCRFS1	0.174269
GATA3	0.174205
RPS10	0.173848
RPL24	0.173767
SELENOW	0.173598
XAGE3	0.173489
CD28	0.173042
CSNK1A1	0.172946
PTP4A1	0.172574
MEST	0.172409
F5	0.171963
GCLM	0.171849
MFSD1	0.171689
C1QB	0.171534
SF3B6	0.171448
PTTG1IP	0.170905
FOLR2	0.170858
TCP1	0.17068
ACSL3	0.170663
TMBIM4	0.170427
ANKRD9	0.170405
MGST3	0.170001
EID2	0.16972
ASPH	0.16915
SLBP	0.169102
METTL7A	0.168979
NEU1	0.168962
HNRNPA0	0.168898
YY1	0.168773
C1GALT1	0.167557
SLC25A5	0.167379
CTSB	0.166974
AGAP3	0.166957
SRSF7	0.166677
FXYD3	0.166392
HNRNPA1	0.166391
CLTC	0.166256
CDKN1C	0.166141
TMEM263	0.166067
STK17A	0.166048
ATP5MD	0.165945
KRT7	0.165518
TSC22D1	0.165478
ARHGAP21	0.165175
TUBA1B	0.165083
MS4A4A	0.164743
MARVELD3	0.164536
OTUD1	0.164415
ADAM9	0.164364
NFATC1	0.164291
TFG	0.164181
RRBP1	0.16407
RPS23	0.163968
NFKB1	0.16396
PDCD7	0.163472
PGP	0.162998
GRASP	0.162839
RAD23B	0.16278
BMP7	0.162099
ARGLU1	0.161978
FBLN1	0.161243
ZEB2	0.161215
TGM2	0.161168
EIF4G2	0.161126
RPSA	0.160898
NCS1	0.160691
NRK	0.160572
TSPAN13	0.160006
SPAG9	0.159674
C1QC	0.159403
SOD1	0.159287
PXDC1	0.159036
HMGCS1	0.159022
TOMM20	0.158724
RPL18	0.158482
CSRP2	0.158364
RASGRP3	0.158319
MCRIP2	0.158241
MGAT1	0.158174
CD46	0.158102
PRNP	0.158088
CLDN23	0.158068
RDX	0.158003
CCND1	0.157807
ATP5PB	0.157197
PPTC7	0.156849
MAN1A1	0.1566
RPS7	0.156555
RPL36	0.156455
TFAP2C	0.155909
DOK2	0.155646
ZNF331	0.15539
GADD45GIP1	0.155058
MZT2B	0.155011
GAS6	0.154865
BHLHE40	0.154632
IGF1	0.154535
SH3TC1	0.154519
MAF	0.154402
TMIGD3	0.154397
H1FX	0.153754
SQLE	0.15326
PTMA	0.153201
REL	0.153165
RAN	0.15314
RPS8	0.153121
C1QA	0.152196
MT2A	0.152164
HSPA9	0.15212
CREM	0.152074
RASSF6	0.151884
PLPP3	0.151798
LIN28B	0.151611
ADRB1	0.151442
ATP5ME	0.151317
LDLR	0.151114
LAMP1	0.15102
ITM2B	0.150995
SPESP1	0.150901
CCT6A	0.150438
FAM13A	0.15016
RPL19	0.150063
HNRNPH1	0.149808
TENT4B	0.14945
CBLB	0.149323
SRSF5	0.149206
HES1	0.149184
SLK	0.149116
RPL14	0.148827
KIF5B	0.148825
TOR1AIP2	0.148516
PPARG	0.148061
MRPS6	0.14805
LSR	0.147214
FSCN1	0.147189
WEE1	0.147147
BCAT1	0.14676
RAPH1	0.146037
MCL1	0.145875
TRAF4	0.145605
RPN2	0.145089
MRPL57	0.145046
NR4A3	0.145039
CYFIP1	0.145026
RPL9	0.144723
GSDME	0.144579
SLC12A7	0.144447
ERVW-1	0.144248
GLDC	0.144025
RANBP1	0.143986
SPTAN1	0.143963
ITPRIPL2	0.1439
PDLIM1	0.143863
ARL8B	0.143844
EGFL7	0.143475
CBX3	0.14303
RBM8A	0.142816
LRP2	0.142742
ACSS1	0.142695
MFHAS1	0.142646
GADD45G	0.142508
LY6E	0.142163
TGIF1	0.142119
RPL30	0.141994
GATM	0.141963
SERBP1	0.141731
PDE4DIP	0.140556
NBL1	0.140454
ACBD3	0.140325
OLFML2B	0.13978
PRELID1	0.139669
JPT1	0.139664
ECHS1	0.139389
DSC3	0.139272
FEM1B	0.139084
KLF3	0.138922
DYNLL1	0.138724
HOMER1	0.138684
MAP1LC3B	0.138511
SLC43A2	0.138496
ADAMTSL4	0.138149
KDELR2	0.13813
CCDC88A	0.138116
UBE2L3	0.137776
FCGR2A	0.137623
GLUD1	0.137215
RPL23A	0.136582
RCOR1	0.136527
HBEGF	0.136514
USP36	0.136024
UQCR11	0.135676
MOB1B	0.135646
EMILIN2	0.135313
RUNX1	0.135282
TLE4	0.135259
ECI1	0.135244
SOCS1	0.134993
DLX5	0.134908
RPL29	0.134636
ARRDC3	0.134453
PTBP1	0.134196
CPEB4	0.134158
PABPC4	0.13405
KLF6	0.133597
COMT	0.133492
INTS6	0.133195
RPL22L1	0.133091
PEAK1	0.133077
FERMT2	0.133061
DEGS1	0.132973
RPL3	0.132917
VDAC1	0.132817
ERRFI1	0.132587
TMBIM6	0.132512
CFD	0.132496
PRPF40A	0.132486
DNAJC21	0.132454
DYNLL2	0.132387
GOLIM4	0.132386
SWAP70	0.132329
BUD23	0.132278
HNRNPA2B1	0.132204
USP14	0.132131
CLDN7	0.132067
BTG2	0.132007
RPS27	0.132003
SPRED1	0.131533
SMOX	0.131497
RPL27A	0.13116
ID3	0.130808
FAM184A	0.130725
RPS18	0.130715
PCBP1	0.130352
SPRY2	0.130299
GSPT1	0.13003
SRSF10	0.129892
SPART	0.129696
SF3B1	0.129682
EIF5A	0.129613
G3BP1	0.129546
PRDX2	0.129452
C2	0.129437
VSIG4	0.129399
RBMS1	0.129383
CENPX	0.129307
RPS3A	0.129267
RPLP1	0.129251
TPM4	0.129163
CCDC186	0.129109
MIDN	0.129014
CCDC47	0.128822
C1orf122	0.128662
SRGAP1	0.128261
ABCA1	0.128022
KRTAP3-1	0.127789
RAB2A	0.127579
CD109	0.127569
WLS	0.12726
SPPL2A	0.127126
ITPKB	0.127055
MALAT1	0.12694
CD86	0.126934
LTC4S	0.126824
CBARP	0.126821
CD14	0.126408
IDH1	0.126299
BHLHE41	0.126259
EIF4B	0.126213
GUK1	0.126114
MALT1	0.12599
WWP1	0.12596
CTTNBP2NL	0.125945
CCT2	0.125683
SLC1A5	0.125586
RPS13	0.12516
RPL26	0.1251
RCN1	0.124926
RBM25	0.124838
POLR2A	0.124792
TMEM8A	0.124783
IQGAP1	0.124732
CDKN2AIP	0.124604
KCNN4	0.124564
SMARCA2	0.124356
DAG1	0.124344
HOOK3	0.124261
POU2F2	0.124136
PARD6B	0.123993
RBBP7	0.123908
FAM20C	0.123732
RPL10A	0.123651
PRKX	0.123245
PSMA3	0.123224
ANKRD1	0.122937
ZSWIM6	0.122815
RPL18A	0.122694
LUZP1	0.122506
YWHAE	0.122219
SGK1	0.122176
CFLAR	0.122162
GLMP	0.12214
RPLP0	0.121414
RPS5	0.121409
LDHB	0.121199
SNX8	0.121146
ZFHX3	0.121017
ERVH48-1	0.120987
NFAT5	0.120968
H2AFZ	0.120655
PCBP2	0.120655
GDF15	0.120563
GRAMD2B	0.120485
MYLIP	0.120183
LAP3	0.120093
CTDSPL	0.119934
GNA15	0.119893
FAM57A	0.119612
MAP3K8	0.119449
45911	0.119364
SLC38A1	0.119156
CHML	0.118441
SLC9A9	0.118433
PSMD7	0.118173
ME1	0.118109
KLF2	0.118028
HILPDA	0.117986
ARL5B	0.117932
AP2A2	0.117672
HMGN2	0.117628
ETS2	0.11746
RPL21	0.11746
ARHGAP5	0.117387
TGFA	0.117331
KDSR	0.11732
RPS4X	0.117237
ZNF750	0.117193
AFF4	0.116916
SRSF11	0.116684
CCNE1	0.116438
PI4K2A	0.116405
PPA1	0.116286
SCN9A	0.116271
EIF2AK1	0.116208
SPP1	0.116069
JTB	0.116038
MUC20-OT1	0.116036
ELF1	0.116011
KHDRBS1	0.115985
IGFBP4	0.115887
SMIM26	0.115807
PPP1R14B	0.115777
COBLL1	0.115695
ITSN1	0.115639
SGMS1	0.115382
HINT1	0.114999
YWHAB	0.114996
SNX2	0.114728
CEP170	0.114675
PABPC1	0.11465
DSEL	0.114527
RPL11	0.114522
ELOB	0.114491
BMP2	0.114279
SLC22A11	0.114256
ZBTB43	0.11399
PPP2CA	0.113911
NENF	0.113862
CD74	0.113756
ANXA2	0.113731
BZW1	0.11366
CBX4	0.113611
NECTIN2	0.113582
PAPOLA	0.113573
MPC2	0.113329
LPAR6	0.113278
DDX17	0.113087
QKI	0.112756
SNRPF	0.112711
SNRPG	0.112654
VDAC2	0.112645
LRPAP1	0.112566
RPL10	0.112126
ATP1A1	0.112115
SYNE2	0.112113
FCGR3A	0.112026
HNRNPA3	0.111762
BAZ1A	0.111745
UNC93B1	0.111379
NAP1L1	0.111306
EPAS1	0.111242
SRRM1	0.111177
RNF19A	0.111048
NR2F2	0.111018
GGH	0.110987
ZCCHC2	0.110724
SUGT1	0.110378
MT-ND6	0.110081
AHSA1	0.109894
ARL6IP5	0.109618
RPL32	0.109576
BMP2K	0.1092
YWHAZ	0.109013
ADA2	0.108985
NEDD4L	0.108918
TMED4	0.108782
PAPSS2	0.108544
USP38	0.108445
SCARB2	0.108078
CCT5	0.107983
BCLAF1	0.107865
TOB2	0.10786
PUM1	0.107736
RPS27A	0.107593
ARF4	0.1074
TXNRD1	0.107359
RHBDF2	0.107202
MLEC	0.107155
GYPC	0.107044
HLA-DRA	0.106813
ADIRF	0.106641
NR4A2	0.106623
GADD45B	0.106601
RCAN1	0.106582
RPL6	0.106527
TPP1	0.106397
CD68	0.106281
TACC2	0.106234
FARP1	0.106227
EPS8L1	0.106097
CROT	0.105905
PAWR	0.105816
H2AFJ	0.105651
FTH1	0.105535
FDFT1	0.105451
LIMA1	0.105285
CABLES1	0.104797
FOXO4	0.104718
LEPROT	0.104643
ISCU	0.10463
C15orf48	0.1046
RPS15A	0.104569
FBN1	0.104441
HMGB1	0.104329
SPARCL1	0.104244
TRIM28	0.104081
PCDH12	0.104011
CCNI	0.10392
MSMO1	0.10384
PPP1R12B	0.1038
CCL2	0.103797
CASP3	0.103748
TMEM51	0.103707
LMAN1	0.103554
ALPK3	0.10347
PLEKHF1	0.103393
AKAP9	0.103342
RPL27	0.103291
CR1	0.10319
IPO7	0.103185
TPR	0.102911
PPP1R15A	0.102886
NFE2L2	0.102728
ETFA	0.102612
EPS8	0.102248
ATP6V1C2	0.102225
EPB41L4A-AS1	0.102155
UGP2	0.102154
EEF2	0.101984
TRIOBP	0.101923
PNN	0.10187
ATP6V0A1	0.101845
SPATS2L	0.101771
MRFAP1	0.101435
RPL4	0.101435
TMEM158	0.101408
RPS19	0.101402
COX7C	0.101259
FCGRT	0.101158
HNRNPR	0.101097
GAREM1	0.100728
SH3GLB2	0.100596
SNHG12	0.10051
CD34	0.100475
SERPINB9	0.100357
SAMD4A	0.100082
AHR	0.100048
HEATR3	0.099921
TJP1	0.0998918
IL6ST	0.0997776
CDH5	0.0995134
MRPS26	0.0994358
CCL4	0.0993284
SON	0.0992888
ELL2	0.099271
PPP1R10	0.0991545
PNRC1	0.0985446
USP12	0.0981177
RPL35	0.0976522
USP37	0.0976125
GLRX5	0.0976032
CTSD	0.0975823
PSMB2	0.097456
SBDS	0.0973685
CADM1	0.0973135
ACTN4	0.0971599
UBXN4	0.0970776
FCGR1A	0.0969609
DDX24	0.0969076
YES1	0.096873
HRH1	0.0967049
GNAI2	0.0967006
DSE	0.0966969
GJC1	0.0966586
APLNR	0.0965166
BAIAP2	0.0963282
ZBTB7A	0.0960912
PRDM1	0.0960213
BTF3	0.0959583
TCF25	0.095925
LRRC8C	0.0959141
RPL8	0.0957207
ATF6	0.0957173
SNX6	0.0957105
PGAM1	0.0955585
ZBTB10	0.0951927
PLXND1	0.0951818
ST6GAL1	0.0951764
PIM3	0.0946139
FCGBP	0.0945657
PPIB	0.0944542
SUZ12	0.0943186
PSMD8	0.0943018
YME1L1	0.0942965
ADAP2	0.094218
YWHAH	0.0940941
NORAD	0.0940888
UQCRB	0.0936936
EIF2S2	0.0936286
SLC7A8	0.0933701
RAMP2	0.0933207
CCDC50	0.0933073
GNA13	0.0932389
SLC39A1	0.0932307
CYTH1	0.0932283
CDK6	0.0931916
MS4A6A	0.0931392
CDO1	0.0930065
FABP4	0.0929921
CD2AP	0.0929281
CNBD2	0.092654
UCP2	0.0926314
SIRPA	0.09247
TMEM40	0.0924076
ECSCR	0.0923752
CCDC32	0.0923482
SOCS6	0.092323
HNRNPF	0.0917842
DHX36	0.0917831
AAED1	0.0917733
HNRNPC	0.0916935
MYOF	0.0916308
HADHB	0.0915241
KPNA4	0.091511
FOXK2	0.0913329
NEAT1	0.0913236
EIF3G	0.0912624
ATP5F1E	0.0912291
PSMB1	0.0910436
CCL5	0.0909752
BRD4	0.0909505
ZC3H15	0.0908562
STARD10	0.0908255
MAGED1	0.0907918
RPL28	0.0906481
HNRNPK	0.0905839
DOT1L	0.090531
INSL4	0.0905213
COX6C	0.0904151
MRPS34	0.090386
YTHDF2	0.0903144
PSMA5	0.0902703
SLC13A4	0.0902203
FCGR2B	0.0901349
PSAP	0.0897132
SELENOI	0.0897058
MEX3B	0.0894335
DDAH2	0.0893796
JUNB	0.0892092
SPTSSA	0.0892051
NUAK1	0.0889662
CHCHD2	0.0889231
VAPA	0.0888662
COPS9	0.0888548
RPS9	0.0888477
ST13	0.0887866
SMARCA5	0.0887553
VWF	0.0886625
ETF1	0.0884762
VEGFA	0.0881369
ZNF706	0.0880921
NSA2	0.0880584
DPP7	0.087995
CXCL3	0.0879942
IDO1	0.0879361
PDGFC	0.0879359
KHSRP	0.0879194
PPP1R15B	0.0875713
SERINC5	0.0874216
KRT23	0.0874157
AL392172.1	0.0873554
YWHAQ	0.0872799
TRA2B	0.0872167
AL359220.1	0.0871382
SND1	0.0870836
FNBP1L	0.0870644
CELF1	0.0869164
DICER1	0.0868147
NDFIP1	0.0867638
MMP19	0.0867262
MSI2	0.0866428
SYNCRIP	0.0864614
TBC1D9	0.0863775
TXNL1	0.0863196
OTULINL	0.0861468
ROR1	0.0860756
PHETA1	0.085822
SLC13A3	0.08569
DDOST	0.0856196
TLE1	0.0854584
CCT4	0.0854528
RPL15	0.0853893
NOL7	0.0853295
FMNL2	0.085324
PSIP1	0.0853129
HEXB	0.0852365
LSM8	0.0851497
REX1BD	0.0848638
KCNQ1	0.0848372
EPOP	0.0845362
CSDE1	0.0844319
ARIH1	0.0843331
TM4SF1	0.0842187
PPP2CB	0.0841214
RRP12	0.0840753
ZNF217	0.0840415
NFATC2	0.0839866
WASF2	0.0838388
DDB1	0.0838288
S100A10	0.083816
SNRPB	0.083688
ARID3A	0.083683
ATP2B1	0.083682
CTNND1	0.0836819
HSPA4	0.0835593
ATF4	0.0834361
PSMD1	0.0834291
FOXP1	0.0834287
AP1B1	0.0832198
EPHA2	0.0831669
AC011526.1	0.0831128
SRSF6	0.0830652
PELI1	0.0830113
CYBB	0.0829286
RGL1	0.0829221
RAB30	0.0828871
RPL12	0.0827034
COLGALT1	0.0825298
STAU1	0.0823999
KLF10	0.0823894
PGBD5	0.0823591
SLC19A2	0.0821855
CD55	0.0821636
TIPARP	0.0821596
UVRAG	0.0821153
PDGFA	0.0819972
KCNJ5	0.0819917
GLS	0.0819773
MEOX2	0.0819629
CTNNA1	0.0819093
LRRC8B	0.0818845
QPRT	0.0818537
RASL11B	0.0818296
GRAMD2A	0.0817709
TBCA	0.0817389
NCEH1	0.0811662
GABARAPL1	0.0811098
LGR4	0.0809805
ZFP36	0.0809725
C6orf62	0.0809034
ATP6AP1	0.0806696
CDC42	0.080547
SMARCA1	0.0805463
EIF5B	0.0804891
AREG	0.080386
TNFRSF4	0.0802558
HIST3H2A	0.0801007
EIF4H	0.0800769
HIF1A	0.0799379
VGLL1	0.0798532
SOX7	0.0798327
AC092718.6	0.0796676
TDRP	0.0796398
PSMB6	0.0795713
RPL17	0.0793813
RAB3IL1	0.0793304
TMEM88	0.0792715
MBD3	0.0791621
CBR1	0.0790493
BCL2L11	0.0789925
ICAM1	0.0789542
TMEM165	0.07893
ATG9B	0.0789105
FDPS	0.0788739
GGCT	0.0788726
PPFIBP1	0.0788605
STARD7	0.0787587
EDN1	0.0786365
CLTB	0.0785693
ZNF703	0.0785011
CH25H	0.0784865
C4orf48	0.0784305
M6PR	0.0784102
DRAM1	0.0783957
ORMDL1	0.0781387
MYO5A	0.0781013
RHOQ	0.0780096
PALMD	0.077943
GPR85	0.0779208
RPS14	0.0778736
COX20	0.0778089
SYT1	0.0777798
LY96	0.0777518
POLR2L	0.0777467
RBM3	0.0777399
KYNU	0.0776923
MET	0.0774985
USP2	0.0774598
ATF7IP2	0.0773333
FAM3B	0.077162
LAMB1	0.0769407
CHPT1	0.0768945
STIP1	0.0768541
HLA-DRB1	0.0767087
SLC25A25	0.0766413
EZH2	0.0766098
NDUFA10	0.0764049
KDM5B	0.0763968
PRR5	0.076338
SLC11A2	0.0763188
SHTN1	0.0763146
ERP29	0.07614
ERG28	0.0760438
PITPNB	0.0758449
DNMBP	0.0757904
PON2	0.0757357
ANKRD37	0.0757254
RAB20	0.075684
MTCH1	0.0755888
EGR1	0.0754266
HNRNPH3	0.0754232
PSMA1	0.0753967
RNF217	0.0752915
JAG1	0.0752146
SERPINH1	0.0751136
PER3	0.0750914
NRROS	0.0750474
TRIM47	0.0749763
SLC6A4	0.0749618
PHB2	0.0748184
SIPA1L2	0.0746084
NOP56	0.0744817
AURKAIP1	0.0744749
GPR34	0.0743561
PTGER4	0.0742763
NLRP3	0.0742405
WDR91	0.0742153
EFNA1	0.0741788
PDCD6	0.0741782
LYPD3	0.0740741
TNFRSF1B	0.0740343
RPLP2	0.074016
STS	0.0739707
PISD	0.0739353
VGLL3	0.0738927
EFR3A	0.0738814
PDE4A	0.0738178
TLR7	0.073804
NDUFV2	0.0737798
IGSF21	0.0736753
PLCXD1	0.0736184
ECI2	0.0733606
RPL36A	0.0733464
UBE2D1	0.0732722
CXCL16	0.0732404
FOXI3	0.0732375
CD59	0.0731537
SPEN	0.073124
PLEKHG2	0.0730038
ANKRD12	0.0728095
KDR	0.0727814
AGL	0.0726118
H3F3A	0.0723551
GNA12	0.0722888
DSTN	0.0721595
ARPC5L	0.0721123
CENPF	0.0720832
NUCKS1	0.072028
HYAL2	0.0720049
CCT8	0.0717834
PHF20	0.0717297
AVPI1	0.0716495
ENY2	0.0714931
RBM17	0.0714583
P4HA1	0.0713635
SAP18	0.0712551
WTAP	0.0711903
BBX	0.0710585
NACA	0.0710129
STARD4	0.0709472
SLC20A2	0.0709035
WARS	0.0708843
FRMD8	0.0708547
ETNK1	0.0708494
TSPAN3	0.0706956
APLN	0.0706691
KRTAP2-3	0.0705574
BORCS7	0.070402
SAMHD1	0.0703551
MCOLN1	0.0703158
ROBO4	0.0703018
PHLDB1	0.070284
KRT18	0.0701617
CMTM8	0.0700398
RPS3	0.0699155
S1PR1	0.0698588
OGT	0.0697617
TGFBI	0.0695796
ZBTB4	0.0695439
TM4SF18	0.0693403
FAM26D	0.0691465
DEPP1	0.0690746
ATRX	0.0690103
ADAM10	0.0689702
SLC40A1	0.0688922
DNAJB9	0.0688508
AKR7A2	0.0688379
MACF1	0.0687917
NDUFB2	0.0687589
ICAM2	0.0687485
MRPL18	0.068694
SKP1	0.0686453
ELOVL4	0.0685899
BEX4	0.0685508
ST3GAL5	0.0685133
UBAP2	0.0683455
PLEKHB2	0.0682661
NAA50	0.0681257
GRB2	0.0680397
GRN	0.067892
PGAP1	0.0676944
SMC3	0.0676595
TNS3	0.0676226
HS3ST1	0.0675721
DPYSL2	0.0675572
SLFN11	0.0673018
GPX4	0.06728
MMRN1	0.0672538
SCN1B	0.067226
ZMIZ1	0.0670462
NNAT	0.0670338
PIK3C2A	0.0669982
PART1	0.0669091
MAPRE2	0.0668778
EGR2	0.0668515
NR1D2	0.0668372
STARD13	0.0667646
GPR42	0.0667419
ZNF451	0.0666125
PPARD	0.0665347
UBA52	0.0664894
IL1RN	0.0664517
AK6	0.0663245
CXCL2	0.0662599
HEBP2	0.06624
HP1BP3	0.066222
CHCHD10	0.066172
EIF1B	0.0660946
ATP6AP2	0.0659245
NDUFAB1	0.0658295
ZFAND2A	0.0652915
MTUS1	0.0652883
PSMA7	0.0651818
PIAS2	0.065047
CD300LG	0.0648788
PFN1	0.0647549
RPL34	0.0646713
EPS15	0.0646082
PYURF	0.0645217
TCF4	0.0645203
YPEL3	0.0645195
RPS6	0.0645118
OCLN	0.064509
TMEM14C	0.0644794
LARP4	0.064386
MAP7D1	0.0643692
LGI2	0.064336
HADHA	0.0642943
DDX21	0.0642228
FNBP4	0.0642003
CRTAP	0.0641052
GRK3	0.0640285
PLD3	0.0640046
RPIA	0.0639216
TNNT3	0.0639169
KBTBD8	0.0638589
BIN1	0.063814
SLC30A1	0.0637689
NOTCH1	0.0637456
GRIN2C	0.0636861
TNFSF9	0.063683
EIF2AK3	0.0636242
TYMS	0.063579
PTPRB	0.0635716
SUMO2	0.0635618
CAMK2G	0.0634943
TFEC	0.063378
BRD7	0.0633564
CD93	0.0633102
ATF5	0.0632879
RAB7A	0.0631337
CYC1	0.0630469
DST	0.0630286
CXorf36	0.0629665
NECTIN4	0.0629533
ARID1B	0.0627191
TRAM1	0.0627067
CLN8	0.0626989
LSM7	0.0626959
ELK3	0.0626427
SDF2L1	0.0626239
SEC11A	0.0625673
TSPAN33	0.0624765
PSMB4	0.062279
FJX1	0.0622755
CD180	0.0622129
TSHZ3	0.0621343
EIF4G1	0.0619825
SRGAP2C	0.0618663
PDGFB	0.0618554
BCL2	0.0618338
VPS13C	0.0618314
TESK1	0.0618097
TMSB10	0.0617273
AKIRIN1	0.061634
TLR2	0.0615521
SKP2	0.061464
PSMD12	0.061445
PLVAP	0.0614296
SDF4	0.0613771
NRN1	0.0613481
SERP1	0.0613439
PHACTR4	0.0613422
UBAC1	0.0612317
CAV1	0.061134
THRAP3	0.0611062
RSRP1	0.061091
HIVEP2	0.061048
DIAPH2	0.0610286
FAM133B	0.0609035
SLC9A1	0.0608586
FEZ2	0.0607787
CHST7	0.0607479
SCAF11	0.0606627
EFNB2	0.0606526
NANOS1	0.06064
RPS26	0.0604934
MT-ATP8	0.0604051
SOAT1	0.0603622
HPGDS	0.0603273
GALNT1	0.0602525
HMGCR	0.060248
PDIA4	0.0602398
PRPF4B	0.0600904
MCTP1	0.0599516
NPTN	0.0599352
CCSAP	0.0599103
GNG11	0.0598629
EIF3E	0.0597095
MIF	0.0596661
CYB5A	0.059649
RNF145	0.0595821
KRT10	0.0595793
ZFAS1	0.0595652
HDLBP	0.0595084
ZNF638	0.0594935
STXBP6	0.0593879
MINDY2	0.059324
TNFAIP8L3	0.0592482
MAMDC2	0.0591625
NXN	0.0591052
IL32	0.0590484
CNDP2	0.0590464
HOXB6	0.0590215
KRT8	0.0590048
C8orf59	0.0588315
PRSS22	0.058792
CMTM6	0.0587344
SCAMP2	0.0586956
HIVEP3	0.058561
CCR1	0.0584577
BPTF	0.058174
RCC2	0.0580986
YTHDC1	0.0580427
GTF2A2	0.0578971
CALD1	0.0578966
GLA	0.0578774
TIE1	0.057756
RABEP1	0.0575783
PMEPA1	0.0575387
ESAM	0.0575039
HEXA	0.0572116
AC016831.5	0.0571953
ILF2	0.0571852
RPL35A	0.0571212
TFPI2	0.0571063
FCN3	0.0570969
C1orf54	0.0570785
SSB	0.0570059
IGF2BP3	0.0569399
ESRRA	0.0569328
FAM129B	0.0569135
NET1	0.0568376
CD163L1	0.0568014
SEPHS2	0.0567718
EPB41L1	0.0567316
RER1	0.0567186
TGFBR2	0.0566223
SASH1	0.0565589
SLC25A36	0.0563729
HS3ST2	0.0563126
FFAR3	0.056222
XRCC6	0.0561798
ABR	0.0561476
CPE	0.0560737
SNRNP70	0.0558371
ACSL1	0.0558224
APOLD1	0.0558206
UBE3A	0.0557786
ABHD8	0.055742
LGR5	0.0556645
PIK3AP1	0.0556245
SH3YL1	0.0555457
PURA	0.055478
AP2S1	0.0554652
NDUFS6	0.0554375
SDPR	0.0553842
SLC17A5	0.0553797
KIF1B	0.0553215
EIF3J	0.0553214
SDS	0.055291
PAGE2	0.0551939
MMRN2	0.0551285
AHCYL1	0.0550541
MYCT1	0.0550277
GCNT2	0.0549425
PARVB	0.0549281
MCUB	0.0549024
MIR155HG	0.0548777
WIPI2	0.0548161
HLX	0.0547786
GPR116	0.0547061
MTRNR2L12	0.0546978
MCFD2	0.0546754
KANK1	0.0546736
EXTL2	0.0546545
PLA2G16	0.0546381
ELOA	0.0544126
CALU	0.0543162
OGFRL1	0.0543028
IL27RA	0.0542884
CREB3L2	0.0541659
TM2D2	0.0540547
KLF16	0.0540269
CCT3	0.0539989
ATP10D	0.0539821
RAB11A	0.0539246
SCARB1	0.0539103
EID1	0.0538381
RAP1B	0.0538234
BMPR2	0.0537773
ABLIM3	0.0537691
CALM2	0.0536891
SEC61B	0.0536516
CHMP1B	0.0536036
HCST	0.0534862
ZBTB1	0.0534761
ITGB4	0.0534442
XPO1	0.0533923
NSG1	0.0532704
GNS	0.0530686
DTNA	0.0530259
FAM43A	0.0529351
TOP2A	0.0526991
P3H2	0.0526562
YAP1	0.0525778
POM121	0.0525409
PMP22	0.0525188
ARHGAP29	0.0524847
UBE2J1	0.0524807
SPIRE1	0.0524033
SOWAHC	0.0522935
IDO2	0.0522649
B3GNT5	0.0521542
BNIP3	0.0520638
DKK2	0.0520462
ZHX2	0.0519858
CLIC4	0.0519251
ADCY4	0.0519026
FOXO1	0.0518488
EIF4A2	0.0518281
NDUFAF8	0.0516929
TAOK3	0.0516762
PSMB5	0.0516176
SMC4	0.051335
RP11-536O18.1	0.0513211
GCLC	0.0512925
IL33	0.051292
RDH10	0.0512285
TENT5B	0.0511328
ESYT2	0.0511228
HTATSF1	0.0510706
PLEKHG5	0.0509099
SHE	0.0509081
ARHGAP6	0.0508509
ASPM	0.050728
MFAP1	0.0506701
FYTTD1	0.0506168
PPIG	0.050582
DDIT4L	0.0505025
RPS15	0.0504954
BST2	0.0504943
LRP1	0.0504937
KIF23	0.0504883
GNG12	0.0503402
SHROOM1	0.050253
TM9SF3	0.050227
DIRC2	0.050073
MXD4	0.0500712
KIAA1217	0.0500534
LAMA5	0.0500364
TNFAIP8	0.050001
FIS1	0.0499553
RPS20	0.0499109
IRF8	0.0498442
RSAD2	0.0498125
NSD3	0.0498117
TUFM	0.0497571
OLR1	0.0497324
HIKESHI	0.0497308
LARGE1	0.0497259
HIPK3	0.049664
GIMAP7	0.0496237
HECTD1	0.049606
NDUFC2	0.0495512
PDCD4	0.0493958
CDCP1	0.0493678
PCNX4	0.0493035
GSTP1	0.0491576
PSMD2	0.049153
ARC	0.0490775
KCTD5	0.0488418
PBX1	0.0488365
NOSTRIN	0.0487706
MAST4	0.0486631
MAGED2	0.048653
CDK7	0.0486456
STOM	0.0486048
EIF3K	0.0485547
CXCL12	0.0485462
VPS53	0.0485256
NOTCH4	0.0484325
RRAGC	0.0484037
COX4I1	0.0483746
RBBP8	0.0483425
SMIM13	0.0483121
HRAS	0.0483014
KIAA1462	0.0482749
CDK2AP2	0.0480886
NRARP	0.0480323
PPFIA1	0.0480219
ITM2A	0.0479629
CYYR1	0.0479033
P2RX7	0.0478802
ARF1	0.0478616
TBC1D4	0.0478446
PSMD3	0.0478199
CCNDBP1	0.0478024
KLF11	0.0477186
KDM2B	0.0476178
ACKR1	0.0476088
CFAP97	0.0475709
ARHGAP31	0.0475525
WWC1	0.0475032
GPRIN3	0.0474643
CD302	0.0473802
RP11-417J8.6	0.0472637
RAB31	0.0471791
CLEC3B	0.047135
LARP1B	0.0471215
SRSF8	0.0471027
SMAD7	0.0470806
SOD3	0.0470712
SELE	0.0469613
TP53I13	0.0469571
KL	0.0469197
CFL1	0.0469121
GTPBP4	0.046904
PLEKHA2	0.0468409
NPL	0.046789
NREP	0.0467762
UAP1	0.046703
KATNA1	0.0466559
TRA2A	0.0466481
HOXB2	0.0466198
FAU	0.046512
PRAG1	0.0465083
ADGRG6	0.0464075
RAMP3	0.0463067
FGD5	0.0462948
MORF4L1	0.0462591
RRAGA	0.046231
SLC8B1	0.0461098
SDCBP	0.0461014
PLA1A	0.0460791
JARID2	0.0460606
EPHX1	0.0460037
RNF130	0.0459622
DOCK9	0.0458594
BLVRB	0.0458498
CRHBP	0.0456238
MFSD12	0.0456236
ICE1	0.0456215
ST3GAL1	0.0455698
IMP3	0.0455268
TMED7	0.0454334
PLK3	0.0454115
CCDC80	0.0454
AC025263.1	0.0453233
RB1	0.0453183
SAV1	0.0452628
PHLDA1	0.0451821
COX8A	0.0451416
MYORG	0.0451176
ENG	0.0449613
RASSF4	0.0449361
DUT	0.0448972
TOR3A	0.0447687
ORC6	0.044709
TMOD3	0.0446193
NDUFA13	0.0446185
ARHGEF10L	0.0445952
PSMD14	0.044448
FCHSD2	0.0444462
FBXO11	0.044404
AP2M1	0.044403
RNH1	0.0443719
LZTS2	0.044277
PANX1	0.044162
NSMCE3	0.0440761
SNHG7	0.0440527
JAM3	0.044024
OAT	0.0440091
NIPSNAP2	0.0439767
MLF1	0.043973
PRDX6	0.0439067
CACYBP	0.0438967
SLC9A3R2	0.043804
CUX1	0.0437373
ETV3	0.0436817
SLC52A1	0.0436813
ABCC1	0.0436662
NUSAP1	0.0436469
TMEM243	0.0435945
RP11-782C8.5	0.0435158
MSRB2	0.0434482
SNRPE	0.043445
FAM107A	0.0434075
CLDN5	0.0433705
RAB9A	0.0433604
COX7B	0.0433495
RASA3	0.0432939
GLG1	0.0432554
HLA-DPA1	0.0432315
HSBP1L1	0.0431052
JUP	0.0431047
PLEKHF2	0.0430879
TMEM259	0.042994
NFIC	0.042868
METAP2	0.042832
TSPAN7	0.0428187
MAGT1	0.0427784
HOMER3	0.0425979
ERG	0.042592
NCOA4	0.0425826
NETO2	0.0425731
OTULIN	0.0425276
PSMB7	0.0424815
MATK	0.0424747
RASSF8	0.0424671
SOCS3	0.042405
PSMC4	0.0422949
CETP	0.0422374
NPPC	0.0421337
AC010980.2	0.0420672
FGFR1	0.0420329
FAM241A	0.0419303
LGALS9	0.0418821
B3GNT2	0.0417969
PSMC6	0.0417691
HEY1	0.0417415
FUT1	0.0415979
ATP13A3	0.0414045
SUCO	0.0413805
EXOC6	0.0413545
PLA2G15	0.0413074
TAL1	0.04127
IL10RA	0.0411967
YTHDC2	0.0411762
SMC1A	0.0410668
GAPLINC	0.0410663
RUFY1	0.0410513
NFKBIE	0.0409851
EI24	0.0409517
FP565260.3	0.04092
ECH1	0.0409145
CAMSAP2	0.0407954
TMEM100	0.0407835
TCF12	0.0406805
ROCK2	0.0406679
CD276	0.0405249
ACVRL1	0.0404585
MRPL4	0.0404183
SGPP1	0.0403668
UQCRH	0.0403295
RC3H1	0.0402945
PLEKHA1	0.040294
PLD4	0.0402717
AC058791.1	0.0401948
LRRC36	0.0401893
FAM167B	0.0401735
ADH5	0.0400165
RBPJ	0.0398779
FAM102B	0.039801
ZNF326	0.0397811
PCOLCE2	0.0397793
PSMA4	0.0396773
SLC8A1	0.0395694
ZBED3-AS1	0.039529
UBE2M	0.0394781
MAML2	0.039425
STARD8	0.0393889
UBE2D3	0.0393474
ZC3H12C	0.0392828
HLA-DQB1	0.0392771
HIC1	0.0392434
EVA1B	0.0392046
HSPA6	0.0391682
PRMT1	0.0391608
ARFGAP3	0.0391551
NMRK2	0.0390248
HAS1	0.038972
TEK	0.038971
ADAMTS1	0.0387731
VCL	0.0387426
EREG	0.0387134
ATXN2	0.038703
H2AFY	0.0386327
PDE8A	0.0386066
RAPGEF5	0.0385549
RASIP1	0.038491
CBR3	0.0384898
TAX1BP1	0.0384459
PLA2G4C	0.0384434
TRAPPC3L	0.0383598
MEF2A	0.0383549
GAS2L3	0.0382557
C17orf58	0.0382004
GRB14	0.0381523
ZMYM2	0.0381518
MKNK1	0.0381454
EIF4G3	0.0381077
MED13	0.0380345
CENPE	0.0379677
SNRPD1	0.0379594
UBE2B	0.0379223
SURF4	0.0378495
CGNL1	0.0378399
PIP5K1A	0.03779
EMP2	0.0377607
ATP6V1G1	0.0377552
FAM111B	0.0376212
HLA-DMA	0.0375892
PECAM1	0.0375858
SELP	0.0375616
PICALM	0.0374616
ARHGAP4	0.0374283
ATXN7L3B	0.0374156
FXR1	0.0373564
DLC1	0.0373467
DNAJC8	0.0373386
CHD4	0.0373077
SVEP1	0.0372302
NOCT	0.0372172
NCOA7	0.0371782
KDELR1	0.0371271
HIST1H2BG	0.0370951
BBS5	0.0370572
CNRIP1	0.0370375
SELENON	0.0369097
RPL13A	0.0368992
AC110995.1	0.0368952
XAF1	0.0368929
GTF2I	0.0368782
C1QTNF9	0.0368293
TAC1	0.0368107
UBE2A	0.0367642
VMO1	0.0366888
PODXL	0.0366877
FRMD4B	0.0366004
FMN1	0.036557
PFDN2	0.0365529
CLDN11	0.0365266
IL1A	0.0365209
LARP1	0.0364497
MPZL1	0.0363553
XIRP1	0.0363457
USP53	0.0362752
SLC4A7	0.036235
NBDY	0.0362333
DENND4A	0.0362273
HGSNAT	0.0362217
THAP12	0.0362159
ACBD6	0.0362085
EEPD1	0.0361768
PDCD1	0.0361229
RTF1	0.0360432
TSPAN18	0.0359981
ENPEP	0.03594
S1PR2	0.0358991
GNB4	0.0357919
HMMR	0.035787
TRIP11	0.0356319
KRT19	0.0355153
KANK3	0.0354809
OGDH	0.0354101
GIPC2	0.035406
TRPS1	0.0353477
DPP4	0.0353087
AC100849.1	0.0352974
COX7A1	0.0352518
STX2	0.0351858
OTUD4	0.0351689
DLG5	0.0351248
SSH1	0.0350603
IL6R	0.0350518
PRKAR1A	0.035035
TNFRSF21	0.0349759
IL13RA1	0.0349513
DUSP4	0.0349448
SH3BGRL	0.0349222
ARL6IP4	0.0349181
GBP4	0.0349117
IFI44L	0.0348959
PDCD5	0.0348672
SMIM3	0.0348529
GIMAP6	0.0347849
SH3RF3-AS1	0.0347526
CSNK1E	0.0347121
AFF1	0.0346872
ARL4D	0.0346623
PHLDA3	0.0346372
CYP1B1	0.0345973
TRIM44	0.0345467
FKBP5	0.0345456
NCK2	0.0345266
CD72	0.0344412
SOBP	0.0344369
DIAPH3	0.0344119
CFAP298	0.0344076
TAF4B	0.0344028
SLC16A1-AS1	0.0343541
ABHD3	0.03434
PPP1CB	0.0343329
EFCAB14	0.0343213
CAVIN2	0.0342804
SRP14	0.0342562
CYB5R1	0.0341787
TRIM36	0.0341351
NCKAP5	0.0340626
LSM4	0.0340603
CD36	0.0340475
MRPL14	0.0339918
ARHGEF15	0.0338809
ZBED3	0.0338581
NCKAP1L	0.0338236
ABCA6	0.0338155
FAM101B	0.0337738
KIFC3	0.033685
SESN2	0.0336307
NAV3	0.0335196
UBE2D2	0.0334766
ADGRL4	0.033468
ASAP2	0.0334411
FAM78A	0.0334314
NECTIN3	0.0333747
ZFX	0.033367
ATRAID	0.0333294
TUT4	0.0333074
PA2G4	0.0332938
TRIM29	0.033293
CCNB1	0.0332459
SPCS2	0.0332358
BDP1	0.0332016
ECPAS	0.0331622
LPHN2	0.033159
TRMT112	0.0331077
LDB2	0.0330987
IER3IP1	0.0330722
UQCRQ	0.0330513
NUP62	0.0329491
C8orf4	0.0329269
MUC15	0.0328674
FAM213A	0.0328641
REEP3	0.0328441
NCBP3	0.0328106
EIF4A1	0.0328073
ELTD1	0.03276
SLC38A11	0.0327581
EIF3L	0.032687
ARRDC4	0.032667
PTPN14	0.0326107
ABHD17A	0.0326014
EML4	0.0325616
CD164	0.0325337
PNPLA8	0.0325191
PPM1G	0.0324425
HLA-DMB	0.0321271
NDNF	0.0321271
IFRD1	0.032078
BRI3	0.0320607
TOMM7	0.0320182
RHOJ	0.0319238
PLXNA2	0.0319205
AGPS	0.0318399
SGSM1	0.0318125
HELLS	0.0318014
NEU4	0.0317663
ABCF1	0.0317503
LRP6	0.0316526
EPB41L2	0.0316274
SMIM30	0.0316178
[truncated: 21,340 more rows]

## Sheet: Retained_Placenta_human_Pvalue
Retained Placenta Merged human celltype pvalue
celltype	pvalue
Cytotrophoblast	3.49645e-06
Monocytes	3.82564e-06
T/NK cell	7.62631e-05
Macrophage(Hofbauer cell)	0.000383585
Syncytiotrophoblast	0.0101089
Granulocyte	0.342488
Extravillous trophoblast	0.355087
Myelocyte	0.363745
Vascular smooth muscle cell	0.425537
Dendritic cell	0.431612
Endothelial cell	0.434066
T cell	0.472963
Decidual cell	0.484833
Stromal cell	0.49655

[truncated: 2 more sheets: human_GWAS_source, Sheet1]
