# Supplementary material for: A longitudinal single-nucleus transcriptomic atlas of the bovine placenta reveals dynamic cellular hierarchies and regulatory networks during gestation
Source: Research Square preprint supplement (doi:10.21203/rs.3.rs-8046408/v1), 2025-11-26
Supplement: Supplementary file 4 [file 5cf109f75a8effd1df958742.xlsx]

## Sheet: Second_vs_Fist
gene	p_val	avg_log2FC	pct.1	pct.2	p_val_adj	Difference	change
PTTG1IP	0	2.46551	0.751	0.479	0	0.272	up
ATP1B3	0	-3.51396	0.27	0.908	0	-0.638	down
TMSB4X	0	2.13186	0.961	0.778	0	0.183	up
CD24	0	3.45136	0.802	0.285	0	0.517	up
NCL	0	-1.3705	0.727	0.943	0	-0.216	down
HSPD1	0	-1.40699	0.672	0.945	0	-0.273	down
HSPE1	0	-1.55612	0.758	0.97	0	-0.212	down
IDH1	0	3.13881	0.665	0.269	0	0.396	up
S100A2	0	3.45638	0.718	0.202	0	0.516	up
S100A11	0	3.59259	0.779	0.222	0	0.557	up
PA2G4	0	-1.33106	0.58	0.898	0	-0.318	down
CFAP54	0	-3.57227	0.044	0.509	0	-0.465	down
KRT18	0	-1.11185	0.992	0.999	0	-0.007	ns
AKR1B1	0	2.45398	0.982	0.798	0	0.184	up
CYCS	0	-1.49882	0.633	0.931	0	-0.298	down
PLAC8A	0	-1.0766	0.842	0.977	0	-0.135	ns
SLC34A2	0	-4.07731	0.078	0.727	0	-0.649	down
CLTA	0	-1.14097	0.719	0.932	0	-0.213	down
TOMM5	0	-1.66379	0.458	0.851	0	-0.393	down
IFNT3	0	2.23001	0.974	0.592	0	0.382	up
IFNT2	0	4.26455	0.938	0.205	0	0.733	up
HAND1	0	4.89718	0.699	0.039	0	0.66	up
CERS4	0	-4.4317	0.013	0.424	0	-0.411	down
TPM4	0	2.22965	0.876	0.616	0	0.26	up
CALM2	0	-1.58489	0.801	0.982	0	-0.181	down
TMSB10	0	2.12902	1	0.998	0	0.002	ns
GALM	0	4.22045	0.66	0.168	0	0.492	up
ANXA2	0	1.54217	0.944	0.807	0	0.137	ns
LGALS3	0	-2.76241	0.665	0.987	0	-0.322	down
HMGB1	0	-1.08483	0.779	0.961	0	-0.182	down
DSTN	0	1.1814	0.984	0.929	0	0.055	ns
TKDP1	0	3.52288	0.996	0.685	0	0.311	up
TKDP4	0	5.09997	0.985	0.079	0	0.906	up
RPS20	0	-0.849261	0.978	0.998	0	-0.02	ns
FABP5	0	3.1996	0.986	0.732	0	0.254	up
PABPC1	0	1.97596	0.992	0.892	0	0.1	ns
PDPN	0	-3.57169	0.062	0.674	0	-0.612	down
PTGS2	0	2.24403	0.848	0.426	0	0.422	up
RANBP1	0	-1.59228	0.493	0.876	0	-0.383	down
RAN	0	-1.26986	0.671	0.927	0	-0.256	down
HMGCS1	0	2.86656	0.715	0.359	0	0.356	up
C18H16orf74	0	-3.82076	0.038	0.552	0	-0.514	down
KRT19	0	1.1327	0.999	0.986	0	0.013	ns
HSD17B1	0	-2.47684	0.264	0.784	0	-0.52	down
C1QBP	0	-1.59614	0.437	0.829	0	-0.392	down
NHERF1	0	-2.6083	0.288	0.824	0	-0.536	down
GPD1L	0	-2.76025	0.263	0.863	0	-0.6	down
GPX1	0	-2.52003	0.215	0.753	0	-0.538	down
DNASE1L3	0	-4.71575	0.064	0.795	0	-0.731	down
HSP90AB1	0	-1.08145	0.966	0.995	0	-0.029	ns
PLA2G7	0	4.09253	0.53	0.069	0	0.461	up
CLIC1	0	-2.20963	0.697	0.979	0	-0.282	down
CISD1	0	-2.15248	0.178	0.668	0	-0.49	down
ASCL2	0	-3.23967	0.146	0.76	0	-0.614	down
SSLP1	0	2.80239	0.992	0.662	0	0.33	up
PAG2	0	2.36677	0.894	0.342	0	0.552	up
FADS1	0	4.34383	0.793	0.137	0	0.656	up
FADS3	0	-3.35787	0.046	0.504	0	-0.458	down
DDX21	0	-1.64002	0.403	0.83	0	-0.427	down
ENSBTAG00000050611	0	3.96622	0.877	0.343	0	0.534	up
ENSBTAG00000053057	0	4.75462	0.632	0.082	0	0.55	up
HSPB1	0	1.97337	0.967	0.743	0	0.224	up
IFNT	0	1.95117	0.977	0.645	0	0.332	up
PPIA	7.62e-306	-1.2612	0.579	0.897	1.48e-301	-0.318	down
RPS27L	1.12e-303	-2.46039	0.062	0.52	2.17e-299	-0.458	down
RPL26	3.15e-302	-0.876273	0.891	0.98	6.1e-298	-0.089	ns
IL18	2.74e-299	-2.46244	0.112	0.579	5.32e-295	-0.467	down
PAG12	4.87e-299	5.12453	0.406	0.015	9.45e-295	0.391	up
AHSG	1.74e-296	4.23986	0.452	0.048	3.38e-292	0.404	up
CCND2	2.47e-296	-3.63084	0.016	0.414	4.8e-292	-0.398	down
C29H11orf98	6.72e-296	-2.51163	0.077	0.532	1.3e-291	-0.455	down
TKDP2	4.1e-295	6.20617	0.382	0.005	7.95e-291	0.377	up
RPS15A	1.1e-293	-0.850928	0.899	0.982	2.13e-289	-0.083	ns
RPS12	1.76e-293	-0.631775	0.996	0.999	3.42e-289	-0.003	ns
H2AZ1	3.98e-292	-1.19016	0.614	0.896	7.72e-288	-0.282	down
RPL30	1e-289	-0.80634	0.927	0.99	1.94e-285	-0.063	ns
CTSH	3.01e-287	-3.45657	0.045	0.454	5.84e-283	-0.409	down
TSPAN1	5.73e-287	4.93881	0.394	0.015	1.11e-282	0.379	up
MTHFD2	2.14e-283	-3.99701	0.015	0.395	4.15e-279	-0.38	down
RAC2	3.18e-283	4.74251	0.415	0.033	6.18e-279	0.382	up
ODC1	7.82e-282	1.43614	0.843	0.711	1.52e-277	0.132	ns
NIFK	1.02e-279	-1.74827	0.285	0.734	1.98e-275	-0.449	down
RPS27A	1.16e-279	-0.643892	0.981	0.995	2.25e-275	-0.014	ns
RPL9	7.28e-278	-0.739082	0.943	0.983	1.41e-273	-0.04	ns
HSP90AA1	9.2e-277	-0.846288	0.907	0.987	1.78e-272	-0.08	ns
RPS23	1.32e-274	-0.780103	0.946	0.985	2.57e-270	-0.039	ns
UQCRQ	1.64e-272	-1.11135	0.637	0.9	3.18e-268	-0.263	down
NPM1	5.05e-268	-1.59895	0.35	0.79	9.79e-264	-0.44	down
CCDC68	1.16e-266	-2.89187	0.029	0.411	2.26e-262	-0.382	down
NPL	1.88e-266	-4.39884	0.006	0.355	3.65e-262	-0.349	down
ARHGDIB	1.64e-265	2.45812	0.685	0.45	3.18e-261	0.235	up
TXN	7.72e-264	-1.07692	0.719	0.939	1.5e-259	-0.22	down
RPL34	1.01e-263	-0.769848	0.961	0.988	1.96e-259	-0.027	ns
NAP1L1	1.39e-263	-1.757	0.241	0.682	2.7e-259	-0.441	down
ENSBTAG00000027204	2.16e-263	-3.24679	0.025	0.398	4.19e-259	-0.373	down
RPL36A	5.62e-263	-0.997764	0.771	0.945	1.09e-258	-0.174	ns
CTSL	2.92e-262	1.64594	0.801	0.6	5.66e-258	0.201	up
ACOT8	1.65e-259	-1.82083	0.194	0.649	3.19e-255	-0.455	down
SORBS1	1.66e-259	-3.47349	0.02	0.382	3.23e-255	-0.362	down
BCAM	8.18e-259	2.4124	0.686	0.442	1.59e-254	0.244	up
CLIC4	4.3e-257	-2.19444	0.056	0.462	8.34e-253	-0.406	down
NACA	7.86e-257	-0.901862	0.776	0.94	1.52e-252	-0.164	ns
PTMA	1.07e-256	-0.780889	0.907	0.986	2.08e-252	-0.079	ns
FOLR1	1.4e-252	-4.67625	0.009	0.346	2.72e-248	-0.337	down
JAKMIP3	4.89e-252	-2.13362	0.102	0.528	9.49e-248	-0.426	down
PLEKHA4	2.17e-251	-2.25917	0.073	0.484	4.22e-247	-0.411	down
ATP5MC3	1.04e-250	-0.812675	0.845	0.968	2.02e-246	-0.123	ns
DYNLL1	2.4e-250	-1.10748	0.624	0.89	4.66e-246	-0.266	down
CHCHD4	1.18e-249	-1.99523	0.135	0.569	2.28e-245	-0.434	down
PRSS23	2e-249	-2.84853	0.043	0.416	3.88e-245	-0.373	down
RPL14	1.49e-248	-0.641725	0.964	0.996	2.89e-244	-0.032	ns
RPL6	2.03e-248	-0.619128	0.982	0.994	3.95e-244	-0.012	ns
RPLP1	8.09e-246	-0.600863	0.994	0.999	1.57e-241	-0.005	ns
GPRC5C	8.39e-246	-2.07925	0.121	0.544	1.63e-241	-0.423	down
SEC11C	1.08e-243	-1.68297	0.231	0.663	2.09e-239	-0.432	down
CTSZ	3.36e-243	-2.74983	0.077	0.464	6.51e-239	-0.387	down
FSCN1	2.91e-242	3.70386	0.507	0.16	5.64e-238	0.347	up
ENSBTAG00000027525	4.49e-241	-2.17477	0.068	0.463	8.72e-237	-0.395	down
CACYBP	5.99e-241	-1.46466	0.351	0.763	1.16e-236	-0.412	down
RPL35A	1.66e-240	-0.727562	0.953	0.985	3.22e-236	-0.032	ns
EMC8	1.15e-239	-1.90948	0.129	0.554	2.24e-235	-0.425	down
BAG2	5.62e-238	-1.75064	0.178	0.612	1.09e-233	-0.434	down
PLCXD1	6.09e-237	-2.53707	0.048	0.418	1.18e-232	-0.37	down
VDAC2	1.03e-236	-1.07127	0.589	0.864	2e-232	-0.275	down
YBX1	1.68e-235	-1.09214	0.593	0.883	3.26e-231	-0.29	down
ATP6V0A4	7.28e-235	-2.15563	0.057	0.435	1.41e-230	-0.378	down
ANP32B	3.39e-234	-1.15332	0.518	0.852	6.58e-230	-0.334	down
C15H11orf96	2.09e-233	4.22245	0.351	0.023	4.06e-229	0.328	up
UQCRH	8.32e-233	-0.8639	0.75	0.933	1.61e-228	-0.183	ns
TOMM20	1.13e-232	-1.36948	0.389	0.777	2.19e-228	-0.388	down
TXNDC17	1.02e-231	-1.73238	0.208	0.646	1.98e-227	-0.438	down
NOL7	4.41e-231	-1.66647	0.201	0.64	8.55e-227	-0.439	down
CSRP2	2.61e-230	-0.98199	0.668	0.894	5.05e-226	-0.226	ns
GLIPR2	2.52e-228	-1.63672	0.224	0.655	4.89e-224	-0.431	down
EIF4A1	4.65e-227	-0.779733	0.847	0.965	9.02e-223	-0.118	ns
RPL37	1.21e-225	-0.72924	0.966	0.991	2.34e-221	-0.025	ns
B3GNT2	2.41e-225	-1.55323	0.248	0.683	4.67e-221	-0.435	down
NOP56	7.01e-225	-1.47452	0.274	0.703	1.36e-220	-0.429	down
RPL27A	2.81e-224	-0.59446	0.978	0.996	5.45e-220	-0.018	ns
TPT1	6.1e-224	-0.610735	0.946	0.988	1.18e-219	-0.042	ns
SPTSSA	1.03e-223	-1.92749	0.093	0.488	2.01e-219	-0.395	down
CALB1	9.48e-223	-4.74916	0.003	0.3	1.84e-218	-0.297	down
TFDP2	8.07e-221	-1.57974	0.146	0.574	1.57e-216	-0.428	down
SERBP1	1.3e-218	-0.975025	0.687	0.918	2.52e-214	-0.231	ns
RPS8	9.45e-218	-0.485666	0.997	0.999	1.83e-213	-0.002	ns
YDJC	1.27e-217	-2.28946	0.058	0.415	2.47e-213	-0.357	down
SSB	2.35e-216	-1.36921	0.333	0.74	4.56e-212	-0.407	down
NDUFC1	1.01e-214	-1.29812	0.441	0.803	1.96e-210	-0.362	down
RPS10	1.14e-214	-0.519808	0.988	0.997	2.22e-210	-0.009	ns
RPL24	1.16e-213	-0.559691	0.98	0.995	2.25e-209	-0.015	ns
UCP2	3.12e-213	-2.90455	0.021	0.333	6.05e-209	-0.312	down
FBL	5.03e-212	-1.17954	0.475	0.818	9.76e-208	-0.343	down
TIMM9	3.26e-211	-2.20745	0.049	0.393	6.32e-207	-0.344	down
NPAS2	4.58e-210	-0.605625	0.967	0.993	8.89e-206	-0.026	ns
RAPGEF2	2.52e-208	2.78831	0.616	0.35	4.88e-204	0.266	up
IDH3A	9.87e-208	-1.54594	0.12	0.521	1.91e-203	-0.401	down
SPINK4	1.44e-207	5.20587	0.298	0.011	2.8e-203	0.287	up
ENSBTAG00000024999	2.45e-207	-2.73246	0.035	0.357	4.75e-203	-0.322	down
S100A10	3.44e-207	0.924771	0.905	0.836	6.68e-203	0.069	ns
ENSBTAG00000052700	7.22e-206	-1.88697	0.083	0.453	1.4e-201	-0.37	down
RPL36AL	1.46e-205	-0.832874	0.807	0.944	2.83e-201	-0.137	ns
SLC9A3	3.69e-205	-2.39033	0.02	0.324	7.16e-201	-0.304	down
ENSBTAG00000036102	5.39e-205	-4.88901	0.003	0.278	1.05e-200	-0.275	down
RPL22	7.26e-205	-0.820511	0.891	0.973	1.41e-200	-0.082	ns
VBP1	6.67e-202	-1.55141	0.196	0.608	1.29e-197	-0.412	down
MPV17L2	1.49e-201	-1.50115	0.22	0.624	2.9e-197	-0.404	down
ITGB2	2.52e-201	4.94211	0.33	0.036	4.9e-197	0.294	up
IGFL1	7.82e-201	5.34127	0.3	0.017	1.52e-196	0.283	up
RPS6	8.08e-201	-0.652757	0.912	0.976	1.57e-196	-0.064	ns
RPS13	1.15e-200	-0.598093	0.951	0.983	2.22e-196	-0.032	ns
RPL23	1.91e-200	-0.546185	0.993	0.998	3.71e-196	-0.005	ns
GSPT1	1.49e-199	-1.29003	0.343	0.726	2.89e-195	-0.383	down
ENSBTAG00000016347	2.87e-199	-1.15373	0.422	0.789	5.56e-195	-0.367	down
ALDH4A1	3.17e-199	-2.96674	0.012	0.297	6.16e-195	-0.285	down
CTF2	3.67e-199	-4.72201	0.009	0.286	7.12e-195	-0.277	down
MIX23	5.32e-199	-1.53152	0.183	0.595	1.03e-194	-0.412	down
EIF1	5.45e-199	-0.812785	0.719	0.92	1.06e-194	-0.201	ns
CRLF3	8e-199	-2.30073	0.027	0.331	1.55e-194	-0.304	down
TMEM86A	1.34e-198	-1.53046	0.206	0.602	2.59e-194	-0.396	down
RPL17	1.56e-198	-0.929156	0.634	0.891	3.02e-194	-0.257	ns
PACSIN3	1.8e-198	-2.05754	0.049	0.378	3.48e-194	-0.329	down
TMSB4	2.28e-197	3.41568	0.508	0.214	4.42e-193	0.294	up
LYAR	2.61e-197	-1.46189	0.139	0.539	5.07e-193	-0.4	down
GDE1	1.3e-195	-1.70838	0.134	0.513	2.51e-191	-0.379	down
SNRPD1	1.88e-194	-1.07053	0.513	0.827	3.65e-190	-0.314	down
RPL5	3.77e-194	-0.667051	0.885	0.969	7.31e-190	-0.084	ns
ATP5PD	1.64e-193	-0.899903	0.673	0.905	3.18e-189	-0.232	ns
MRPL20	5.43e-193	-1.27142	0.369	0.747	1.05e-188	-0.378	down
MRPS36	1.61e-192	-1.62563	0.108	0.482	3.12e-188	-0.374	down
RPS3A	4.63e-192	-0.544994	0.97	0.989	8.99e-188	-0.019	ns
PNO1	4.67e-191	-1.78164	0.096	0.458	9.06e-187	-0.362	down
NUCB2	7.45e-191	-1.55069	0.224	0.62	1.45e-186	-0.396	down
PCNA	1.16e-190	-1.4314	0.205	0.614	2.25e-186	-0.409	down
MDK	4.47e-190	-2.05007	0.044	0.359	8.67e-186	-0.315	down
BRIX1	6.67e-190	-1.4892	0.1	0.469	1.29e-185	-0.369	down
BOLA3	1.03e-189	-1.5716	0.131	0.516	1.99e-185	-0.385	down
CADM1	1.12e-189	4.51263	0.373	0.077	2.18e-185	0.296	up
SRP19	1.74e-189	-1.5041	0.128	0.514	3.37e-185	-0.386	down
TMEM254	1.98e-189	-1.79856	0.056	0.385	3.84e-185	-0.329	down
GGCT	5.01e-189	-1.64219	0.102	0.469	9.71e-185	-0.367	down
OAT	1.08e-188	-1.54282	0.103	0.47	2.1e-184	-0.367	down
ENSBTAG00000052466	4.73e-188	-1.37182	0.242	0.652	9.17e-184	-0.41	down
METRNL	1.02e-187	-1.78953	0.082	0.43	1.98e-183	-0.348	down
FAM83B	1.68e-187	-1.67687	0.058	0.388	3.26e-183	-0.33	down
SLC2A3	2.08e-187	1.87367	0.695	0.509	4.04e-183	0.186	up
IRX3	4.31e-186	-1.56481	0.126	0.501	8.37e-182	-0.375	down
RWDD1	8.77e-186	-1.36372	0.258	0.662	1.7e-181	-0.404	down
ATP5MC1	4.05e-185	-0.775046	0.698	0.917	7.85e-181	-0.219	ns
NXT1	4.26e-185	-1.50259	0.135	0.514	8.26e-181	-0.379	down
ACTG1	5.33e-185	-0.551357	0.994	0.998	1.03e-180	-0.004	ns
EPCAM	1.28e-184	-1.32986	0.285	0.676	2.49e-180	-0.391	down
RRP1B	5.6e-184	-1.52847	0.078	0.423	1.09e-179	-0.345	down
RPS24	7.32e-184	-0.555977	0.991	0.995	1.42e-179	-0.004	ns
REEP5	1.69e-183	1.9034	0.649	0.46	3.28e-179	0.189	up
MRPS5	2.37e-183	-1.43346	0.147	0.533	4.6e-179	-0.386	down
CMBL	7.75e-183	-1.62376	0.086	0.433	1.5e-178	-0.347	down
DESI2	8.92e-183	-1.3527	0.098	0.459	1.73e-178	-0.361	down
GINS1	1.5e-182	-1.28638	0.134	0.521	2.9e-178	-0.387	down
RTRAF	2.83e-182	-1.07729	0.488	0.8	5.49e-178	-0.312	down
ENSBTAG00000052892	1.2e-181	-1.59348	0.12	0.48	2.33e-177	-0.36	down
PAK1IP1	2.77e-181	-1.47283	0.089	0.44	5.38e-177	-0.351	down
NGEF	5.94e-181	-1.77402	0.037	0.335	1.15e-176	-0.298	down
CDX2	1.69e-180	-2.06405	0.045	0.35	3.29e-176	-0.305	down
CCDC59	3.87e-180	-1.43683	0.134	0.513	7.51e-176	-0.379	down
MAK16	1.41e-179	-1.48439	0.101	0.459	2.74e-175	-0.358	down
PRORSD1	3.12e-179	-1.45828	0.164	0.55	6.05e-175	-0.386	down
AASDHPPT	8.75e-179	-1.23185	0.33	0.714	1.7e-174	-0.384	down
RPS9	8.84e-179	-0.455995	0.985	0.999	1.72e-174	-0.014	ns
UMPS	2.14e-178	-1.42716	0.095	0.448	4.15e-174	-0.353	down
BCL10	2.66e-178	-1.78918	0.058	0.376	5.17e-174	-0.318	down
POLR1G	9.51e-178	-1.53285	0.074	0.408	1.84e-173	-0.334	down
NDRG1	1.19e-177	4.18167	0.307	0.035	2.31e-173	0.272	up
MESD	1.43e-177	-1.33964	0.264	0.642	2.77e-173	-0.378	down
CNBP	1.48e-177	-1.24717	0.349	0.716	2.88e-173	-0.367	down
FN1	1.68e-177	2.54384	0.599	0.353	3.25e-173	0.246	up
POLR2K	1.56e-176	-1.74446	0.066	0.39	3.02e-172	-0.324	down
ISCA1	2.34e-176	-1.3371	0.262	0.658	4.54e-172	-0.396	down
FDXR	5.16e-176	-2.47422	0.028	0.305	1e-171	-0.277	down
RCN2	1.34e-175	-1.3623	0.087	0.43	2.6e-171	-0.343	down
TOMM7	1.34e-175	-1.11748	0.432	0.781	2.6e-171	-0.349	down
CST3	1.46e-175	1.44189	0.745	0.646	2.84e-171	0.099	ns
P2RX4	1.06e-174	-2.80581	0.016	0.278	2.06e-170	-0.262	down
MRPS18C	1.51e-174	-1.539	0.108	0.462	2.92e-170	-0.354	down
MRPL47	2.79e-174	-1.42134	0.122	0.485	5.41e-170	-0.363	down
ATP11A	4.56e-174	-1.79919	0.035	0.324	8.84e-170	-0.289	down
MRPL35	4.99e-174	-1.39801	0.149	0.527	9.69e-170	-0.378	down
NPM3	9.09e-174	-1.70812	0.077	0.407	1.76e-169	-0.33	down
TBRG1	1.59e-173	-1.44178	0.08	0.412	3.09e-169	-0.332	down
PPAN	4.18e-173	-1.49744	0.099	0.446	8.1e-169	-0.347	down
TLE1	5.14e-173	-2.00728	0.031	0.311	9.97e-169	-0.28	down
GPATCH4	6.42e-173	-1.37912	0.1	0.449	1.25e-168	-0.349	down
RPL10A	6.7e-173	-0.538142	0.949	0.99	1.3e-168	-0.041	ns
EPS8L1	8.82e-173	-1.57588	0.065	0.385	1.71e-168	-0.32	down
MRPS14	1.7e-172	-1.30286	0.221	0.617	3.29e-168	-0.396	down
POLR1F	2.74e-172	-1.41101	0.102	0.45	5.33e-168	-0.348	down
RPS28	8e-172	-0.471266	0.995	1	1.55e-167	-0.005	ns
ISOC1	1.14e-171	-1.49299	0.11	0.461	2.2e-167	-0.351	down
PRELID1	1.87e-171	-1.20836	0.4	0.73	3.62e-167	-0.33	down
CDK14	1.96e-171	2.44145	0.629	0.421	3.79e-167	0.208	up
TXNRD1	1.99e-171	-1.48761	0.076	0.405	3.86e-167	-0.329	down
SET	2.56e-171	-1.02103	0.514	0.808	4.96e-167	-0.294	down
SNX6	4.51e-171	-1.33751	0.185	0.568	8.74e-167	-0.383	down
RPAP3	1.03e-170	-1.50294	0.1	0.446	2e-166	-0.346	down
PINX1	1.38e-170	-1.44557	0.082	0.414	2.68e-166	-0.332	down
RPL37A	1.76e-170	-0.582796	0.947	0.99	3.41e-166	-0.043	ns
FXYD4	3.61e-170	-0.922899	0.523	0.838	7e-166	-0.315	ns
COX7A2	4.56e-170	-0.686402	0.802	0.947	8.85e-166	-0.145	ns
PSMB2	1.12e-169	-0.991803	0.513	0.805	2.18e-165	-0.292	ns
TEX30	1.55e-169	-1.92911	0.047	0.34	3.01e-165	-0.293	down
PHF5A	1.63e-169	-1.38538	0.182	0.563	3.17e-165	-0.381	down
ENSBTAG00000026909	3.23e-169	-2.11956	0.039	0.322	6.26e-165	-0.283	down
RPS25	4.29e-169	-0.574309	0.944	0.977	8.32e-165	-0.033	ns
RPL21	5.34e-169	-0.66378	0.858	0.965	1.04e-164	-0.107	ns
WDR43	7.83e-169	-1.22631	0.214	0.607	1.52e-164	-0.393	down
ENSBTAG00000034506	1.89e-168	-2.09867	0.043	0.331	3.67e-164	-0.288	down
PBDC1	2.36e-168	-1.3147	0.124	0.484	4.59e-164	-0.36	down
GAR1	3.91e-168	-2.07042	0.03	0.304	7.58e-164	-0.274	down
METTL13	5.23e-168	-1.34163	0.083	0.413	1.01e-163	-0.33	down
MRPL19	5.24e-168	-1.44908	0.104	0.448	1.02e-163	-0.344	down
MRPL21	6.44e-168	-1.27328	0.265	0.653	1.25e-163	-0.388	down
BTF3	6.92e-168	-1.01494	0.547	0.838	1.34e-163	-0.291	down
GMNN	3.4e-167	-1.31921	0.149	0.518	6.59e-163	-0.369	down
SNRPF	6.21e-167	-1.21232	0.32	0.711	1.21e-162	-0.391	down
HEBP2	1.28e-166	-1.39322	0.075	0.397	2.48e-162	-0.322	down
PRDX6	1.9e-166	-1.21811	0.324	0.689	3.69e-162	-0.365	down
SRP14	2e-166	-1.30545	0.264	0.64	3.87e-162	-0.376	down
C3H1orf52	9.56e-166	-1.47654	0.071	0.387	1.85e-161	-0.316	down
ZNF593	1.13e-165	-1.38404	0.207	0.588	2.19e-161	-0.381	down
ASAH1	1.42e-165	-1.96026	0.032	0.305	2.76e-161	-0.273	down
ITPRID2	1.83e-165	-2.4259	0.014	0.262	3.55e-161	-0.248	down
RBM34	2.33e-165	-1.59885	0.05	0.345	4.52e-161	-0.295	down
GATA3	4.33e-165	2.23296	0.608	0.421	8.39e-161	0.187	up
TIMM23	6.21e-165	-1.2459	0.225	0.611	1.21e-160	-0.386	down
SOD2	1.14e-164	-1.41481	0.106	0.447	2.22e-160	-0.341	down
EIF2S1	1.92e-164	-1.2247	0.215	0.604	3.72e-160	-0.389	down
NSA2	2.02e-164	-1.13288	0.373	0.746	3.91e-160	-0.373	down
MLH1	2.07e-164	-1.39321	0.104	0.444	4.02e-160	-0.34	down
ZNF706	9.13e-164	-1.33181	0.22	0.595	1.77e-159	-0.375	down
CTNNAL1	1.02e-163	-1.75218	0.028	0.294	1.98e-159	-0.266	down
SELENOS	1.54e-163	-1.317	0.221	0.599	3e-159	-0.378	down
SLC1A1	2.17e-163	-1.28455	0.09	0.421	4.21e-159	-0.331	down
PAICS	2.18e-163	-1.24781	0.242	0.626	4.23e-159	-0.384	down
NAA20	2.95e-163	-1.38811	0.117	0.465	5.72e-159	-0.348	down
CISD2	7.95e-163	-1.38499	0.122	0.472	1.54e-158	-0.35	down
SLC48A1	8.98e-163	-2.25208	0.029	0.293	1.74e-158	-0.264	down
RPS29	1.14e-162	-0.649689	0.98	0.996	2.21e-158	-0.016	ns
ENSBTAG00000015077	1.54e-162	-1.36681	0.07	0.383	2.99e-158	-0.313	down
PPP1R9A	1.54e-162	5.27426	0.281	0.033	3e-158	0.248	up
EBNA1BP2	2.75e-162	-1.26063	0.155	0.526	5.34e-158	-0.371	down
NEU1	2.17e-161	-1.59279	0.053	0.345	4.2e-157	-0.292	down
HYPK	2.47e-161	-1.08832	0.449	0.792	4.79e-157	-0.343	down
SLIRP	7.76e-161	-1.20947	0.333	0.722	1.51e-156	-0.389	down
PHB1	1.6e-160	-1.07739	0.44	0.771	3.11e-156	-0.331	down
EXOSC8	2.09e-160	-1.3691	0.1	0.433	4.05e-156	-0.333	down
SHMT2	3.22e-160	-1.48796	0.061	0.359	6.25e-156	-0.298	down
RRM2	3.69e-160	-1.20748	0.213	0.598	7.15e-156	-0.385	down
C15H11orf58	4.05e-160	-1.1898	0.337	0.707	7.86e-156	-0.37	down
SNRNP27	5.91e-160	-1.25989	0.205	0.587	1.15e-155	-0.382	down
UTP3	1.28e-159	-1.27143	0.098	0.43	2.48e-155	-0.332	down
SMIM13	3.12e-159	-1.29654	0.085	0.404	6.04e-155	-0.319	down
CDV3	3.13e-159	-1.18615	0.299	0.668	6.08e-155	-0.369	down
MRPL46	3.69e-159	-1.21839	0.173	0.548	7.15e-155	-0.375	down
DENR	5.22e-159	-1.28039	0.129	0.482	1.01e-154	-0.353	down
CAPG	5.64e-159	0.94888	0.825	0.754	1.09e-154	0.071	ns
MRPL16	7.85e-159	-1.41416	0.123	0.468	1.52e-154	-0.345	down
RIMKLB	8.96e-159	-2.50399	0.022	0.273	1.74e-154	-0.251	down
ABCC2	9.89e-159	-2.21752	0.028	0.286	1.92e-154	-0.258	down
PPAT	1.92e-158	-1.04033	0.122	0.475	3.73e-154	-0.353	down
RPL7	5.23e-158	-0.510457	0.944	0.98	1.02e-153	-0.036	ns
DNMT3A	3.26e-157	-2.48888	0.083	0.369	6.32e-153	-0.286	down
COX16	3.41e-157	-1.29306	0.162	0.526	6.62e-153	-0.364	down
NOP16	4.35e-157	-1.80597	0.05	0.332	8.43e-153	-0.282	down
EIF3M	6.76e-157	-1.066	0.374	0.744	1.31e-152	-0.37	down
UQCRB	7.5e-157	-0.939661	0.635	0.87	1.45e-152	-0.235	ns
LIMA1	8.88e-157	-1.19533	0.2	0.573	1.72e-152	-0.373	down
PLLP	1.42e-156	-1.87623	0.035	0.3	2.75e-152	-0.265	down
SLC25A3	1.56e-156	-0.778975	0.66	0.869	3.03e-152	-0.209	ns
RRP15	1.95e-156	-1.12345	0.127	0.478	3.79e-152	-0.351	down
TIMM8A	1.96e-156	-1.28051	0.243	0.611	3.8e-152	-0.368	down
DNAJC2	3.76e-156	-1.10129	0.179	0.557	7.29e-152	-0.378	down
GNL3	3.88e-156	-1.05558	0.112	0.455	7.53e-152	-0.343	down
MRPL32	4.9e-156	-1.59867	0.075	0.38	9.5e-152	-0.305	down
SMIM20	1.99e-155	-1.42501	0.109	0.438	3.86e-151	-0.329	down
MRPL33	2.08e-155	-1.29144	0.162	0.524	4.04e-151	-0.362	down
ENSBTAG00000005495	2.45e-155	-1.72775	0.055	0.34	4.75e-151	-0.285	down
AIMP1	2.89e-155	-1.1003	0.317	0.697	5.62e-151	-0.38	down
DPH3	3.11e-155	-1.4051	0.108	0.438	6.03e-151	-0.33	down
SRM	3.91e-155	-1.27403	0.317	0.662	7.58e-151	-0.345	down
ZCRB1	8.48e-155	-1.25188	0.108	0.443	1.64e-150	-0.335	down
AGFG1	2.02e-154	-1.0727	0.167	0.539	3.91e-150	-0.372	down
GCSH	3.84e-154	-1.4784	0.101	0.422	7.44e-150	-0.321	down
TMEM126A	6.85e-154	-1.23541	0.194	0.567	1.33e-149	-0.373	down
RALBP1	7.52e-154	-1.17918	0.196	0.563	1.46e-149	-0.367	down
COMMD1	9.32e-154	-1.13228	0.105	0.436	1.81e-149	-0.331	down
GLRX2	1.15e-153	-1.2171	0.178	0.544	2.24e-149	-0.366	down
DDX52	1.94e-153	-1.13328	0.115	0.454	3.77e-149	-0.339	down
PMPCB	2.11e-153	-1.16561	0.108	0.44	4.1e-149	-0.332	down
NCKAP5	6.81e-153	4.9469	0.267	0.03	1.32e-148	0.237	up
SNRPA1	1.19e-152	-1.14699	0.326	0.685	2.3e-148	-0.359	down
LAMTOR5	1.91e-152	-1.20601	0.246	0.616	3.71e-148	-0.37	down
COBL	4.95e-152	-1.80909	0.043	0.31	9.61e-148	-0.267	down
ANKRD9	1.95e-151	-1.44201	0.069	0.364	3.78e-147	-0.295	down
FLNC	3.03e-151	3.96625	0.322	0.07	5.88e-147	0.252	up
PFN1	3.28e-151	0.984172	0.977	0.967	6.36e-147	0.01	ns
CCT2	4.98e-151	-0.928867	0.482	0.795	9.66e-147	-0.313	ns
LPIN2	5.89e-151	-1.15744	0.086	0.398	1.14e-146	-0.312	down
MORN3	6.78e-151	-2.08392	0.028	0.277	1.31e-146	-0.249	down
GTF2A1L	9.85e-151	-1.85072	0.034	0.29	1.91e-146	-0.256	down
ASS1	1.06e-150	3.16923	0.366	0.104	2.05e-146	0.262	up
CA2	1.13e-150	3.17218	0.339	0.08	2.2e-146	0.259	up
DPPA4	1.34e-150	-1.9639	0.023	0.264	2.59e-146	-0.241	down
ENSBTAG00000054228	1.63e-150	-1.96887	0.024	0.268	3.17e-146	-0.244	down
NAT10	2.34e-150	-1.13629	0.074	0.376	4.55e-146	-0.302	down
LMO4	3.34e-150	-1.19666	0.109	0.437	6.47e-146	-0.328	down
CLN8	5.9e-150	-1.32292	0.092	0.403	1.14e-145	-0.311	down
SPCS3	1.21e-149	-1.13425	0.348	0.705	2.36e-145	-0.357	down
PHOSPHO1	2.88e-149	-3.20304	0.008	0.225	5.58e-145	-0.217	down
GTPBP4	5.72e-149	-1.16464	0.161	0.516	1.11e-144	-0.355	down
CFL2	7.04e-149	-1.69861	0.044	0.31	1.37e-144	-0.266	down
TNNI3	4.39e-148	-3.86349	0.005	0.217	8.51e-144	-0.212	down
UBE2E1	5.83e-148	-1.08888	0.144	0.493	1.13e-143	-0.349	down
RIPOR2	5.98e-148	4.13067	0.274	0.037	1.16e-143	0.237	up
EIF4EBP1	6.09e-148	-1.11999	0.282	0.647	1.18e-143	-0.365	down
APIP	6.51e-148	-1.2551	0.1	0.418	1.26e-143	-0.318	down
NOP10	1.11e-147	-1.16246	0.354	0.705	2.16e-143	-0.351	down
EAPP	1.72e-147	-1.48119	0.064	0.349	3.34e-143	-0.285	down
FAM234A	2.17e-147	-1.24945	0.069	0.359	4.22e-143	-0.29	down
TRAM2	6.86e-147	-1.24299	0.109	0.431	1.33e-142	-0.322	down
S100A16	9.91e-147	-0.869052	0.562	0.837	1.92e-142	-0.275	ns
RALA	1.21e-146	-1.0567	0.141	0.488	2.35e-142	-0.347	down
RBP4	1.32e-146	2.33205	0.46	0.19	2.57e-142	0.27	up
ENSBTAG00000030305	1.71e-146	-1.03144	0.424	0.758	3.32e-142	-0.334	down
SLC20A1	2.49e-146	-1.34075	0.087	0.392	4.83e-142	-0.305	down
RPP30	3.43e-146	-1.21743	0.078	0.377	6.65e-142	-0.299	down
RNF7	3.94e-146	-1.62633	0.048	0.315	7.65e-142	-0.267	down
TOMM6	1.34e-145	-0.950083	0.518	0.804	2.6e-141	-0.286	ns
TPRKB	1.52e-145	-1.2302	0.111	0.434	2.94e-141	-0.323	down
RSL24D1	3.02e-145	-1.17292	0.183	0.539	5.86e-141	-0.356	down
SYNGR1	3.41e-145	-1.19966	0.214	0.564	6.62e-141	-0.35	down
DNAJA2	4.09e-145	-1.11	0.198	0.56	7.94e-141	-0.362	down
TNS1	5.16e-145	-2.13236	0.015	0.239	1e-140	-0.224	down
RBPMS2	8.34e-145	-3.20366	0.004	0.21	1.62e-140	-0.206	down
TNIP1	1.22e-144	-1.25763	0.084	0.385	2.37e-140	-0.301	down
UTP4	1.42e-144	-1.34676	0.052	0.323	2.75e-140	-0.271	down
EIF4E	4.2e-144	-1.078	0.198	0.565	8.14e-140	-0.367	down
SUMO2	4.52e-144	-0.933642	0.517	0.802	8.77e-140	-0.285	ns
PPID	4.72e-144	-1.16669	0.164	0.514	9.15e-140	-0.35	down
ZFAND2A	7.85e-144	-1.44823	0.043	0.301	1.52e-139	-0.258	down
ADAMTS9	9.26e-144	4.32291	0.272	0.039	1.8e-139	0.233	up
SELENOP	2.89e-143	1.5017	0.671	0.551	5.61e-139	0.12	ns
EXOSC5	4.15e-143	-1.34289	0.077	0.369	8.05e-139	-0.292	down
AMD1	5.96e-143	-1.09167	0.227	0.59	1.16e-138	-0.363	down
RIN3	8.47e-143	-1.07984	0.127	0.458	1.64e-138	-0.331	down
HNRNPA2B1	8.68e-143	-0.9476	0.491	0.81	1.68e-138	-0.319	ns
EMC7	1.07e-142	-1.16547	0.134	0.464	2.07e-138	-0.33	down
RPL19	1.16e-142	-0.561461	0.89	0.97	2.25e-138	-0.08	ns
CYP2S1	2.02e-142	-2.57345	0.016	0.237	3.92e-138	-0.221	down
LMAN1	2.99e-142	-1.10077	0.161	0.501	5.79e-138	-0.34	down
SRPK1	3.08e-142	-0.996605	0.105	0.424	5.97e-138	-0.319	ns
MTRFR	3.09e-142	-1.22552	0.125	0.453	6e-138	-0.328	down
NHP2	3.29e-142	-1.16046	0.231	0.594	6.39e-138	-0.363	down
UCHL5	3.84e-142	-1.01642	0.195	0.56	7.45e-138	-0.365	down
WDR77	4.56e-142	-1.58916	0.05	0.314	8.84e-138	-0.264	down
SLC2A13	7.83e-142	-1.50464	0.064	0.342	1.52e-137	-0.278	down
ATIC	1.47e-141	-1.06204	0.273	0.638	2.86e-137	-0.365	down
SMNDC1	1.53e-141	-1.11197	0.087	0.387	2.97e-137	-0.3	down
MRPL55	2.45e-141	-1.19348	0.132	0.464	4.76e-137	-0.332	down
RSL1D1	4.44e-141	-1.08802	0.249	0.612	8.62e-137	-0.363	down
RPE	6.01e-141	-1.22921	0.065	0.345	1.16e-136	-0.28	down
TOMM22	6.51e-141	-1.15293	0.289	0.64	1.26e-136	-0.351	down
RIDA	1.02e-140	-1.26093	0.112	0.427	1.99e-136	-0.315	down
CHCHD1	1.52e-140	-1.1793	0.166	0.511	2.95e-136	-0.345	down
RPF2	2.6e-140	-1.23388	0.06	0.334	5.05e-136	-0.274	down
FAU	4.44e-140	-0.490013	0.937	0.989	8.62e-136	-0.052	ns
RFC3	7.04e-140	-1.107	0.105	0.418	1.37e-135	-0.313	down
MPHOSPH10	8.23e-140	-1.18979	0.063	0.34	1.6e-135	-0.277	down
RPF1	9.19e-140	-1.16208	0.107	0.421	1.78e-135	-0.314	down
HSPA14	1.01e-139	-1.04246	0.14	0.479	1.96e-135	-0.339	down
LSM1	1.21e-139	-1.22587	0.127	0.449	2.35e-135	-0.322	down
COBLL1	1.3e-139	-1.14776	0.12	0.443	2.53e-135	-0.323	down
GRAMD1C	1.88e-139	-1.50019	0.032	0.273	3.65e-135	-0.241	down
DCTPP1	2.43e-139	-1.1649	0.181	0.527	4.72e-135	-0.346	down
RAPGEF5	2.49e-139	-1.3353	0.046	0.302	4.82e-135	-0.256	down
PSMG2	3.01e-139	-1.1429	0.16	0.502	5.85e-135	-0.342	down
SRSF9	8.29e-139	-1.06292	0.33	0.686	1.61e-134	-0.356	down
MFAP3L	1.03e-138	-1.17545	0.061	0.333	1.99e-134	-0.272	down
NDUFA5	1.08e-138	-1.06943	0.365	0.722	2.09e-134	-0.357	down
NDUFAF2	2.46e-138	-1.02204	0.156	0.503	4.77e-134	-0.347	down
NOLC1	3.15e-138	-1.0728	0.218	0.576	6.11e-134	-0.358	down
APOO	8.3e-138	-1.25814	0.103	0.409	1.61e-133	-0.306	down
PSMA1	8.81e-138	-0.98549	0.396	0.738	1.71e-133	-0.342	ns
NDUFB1	1.51e-137	-0.98198	0.497	0.812	2.94e-133	-0.315	ns
CDKN1C	1.72e-137	3.67979	0.279	0.048	3.34e-133	0.231	up
ATP5F1E	2.08e-137	-0.732372	0.773	0.932	4.04e-133	-0.159	ns
CTSV	2.11e-137	-1.64447	0.064	0.335	4.1e-133	-0.271	down
TIMM13	6.64e-137	-1.01654	0.384	0.723	1.29e-132	-0.339	down
MAGOHB	9.15e-137	-1.23206	0.111	0.421	1.78e-132	-0.31	down
PSMA7	1.35e-136	-0.746059	0.654	0.862	2.63e-132	-0.208	ns
TCP1	1.84e-136	-1.09122	0.281	0.635	3.57e-132	-0.354	down
RPS5	1.99e-136	-0.419651	0.987	0.998	3.85e-132	-0.011	ns
C29H11orf54	3.69e-136	-1.98956	0.017	0.232	7.15e-132	-0.215	down
AHSA1	4.46e-136	-1.07272	0.204	0.559	8.65e-132	-0.355	down
MAGOH	5.45e-136	-1.09033	0.238	0.597	1.06e-131	-0.359	down
RPL3	6.8e-136	-0.517325	0.897	0.969	1.32e-131	-0.072	ns
PDAP1	7.21e-136	-1.09173	0.172	0.518	1.4e-131	-0.346	down
BCCIP	1.4e-135	-1.00574	0.142	0.475	2.72e-131	-0.333	down
GNPDA1	1.55e-135	-1.11149	0.182	0.523	3.02e-131	-0.341	down
TXNL1	1.79e-135	-1.07125	0.259	0.615	3.48e-131	-0.356	down
AGPAT2	1.8e-135	-1.23059	0.105	0.409	3.5e-131	-0.304	down
ZNRD2	2.2e-135	-1.16197	0.133	0.458	4.27e-131	-0.325	down
TPM3	3.32e-135	-0.817611	0.633	0.879	6.45e-131	-0.246	ns
ITGA6	5.01e-135	3.24705	0.448	0.222	9.73e-131	0.226	up
ULBP13	6.09e-135	-2.71454	0.008	0.207	1.18e-130	-0.199	down
RWDD4	7.42e-135	-1.13738	0.108	0.414	1.44e-130	-0.306	down
PTGES3	8.11e-135	-0.893293	0.498	0.795	1.57e-130	-0.297	ns
SLC25A33	1.14e-134	-1.16731	0.059	0.325	2.21e-130	-0.266	down
ENSBTAG00000051299	6.13e-134	-1.58602	0.032	0.265	1.19e-129	-0.233	down
LSM12	8.07e-134	-0.976317	0.147	0.481	1.56e-129	-0.334	ns
SSBP1	8.53e-134	-1.05503	0.223	0.582	1.66e-129	-0.359	down
OTUD6B	1.12e-133	-1.02361	0.073	0.351	2.18e-129	-0.278	down
EEF1E1	1.36e-133	-1.11914	0.13	0.45	2.63e-129	-0.32	down
OSTC	2.07e-133	-1.05033	0.337	0.688	4.02e-129	-0.351	down
ESF1	3.01e-133	-0.898222	0.101	0.404	5.84e-129	-0.303	ns
C24H18orf21	4.66e-133	-1.47856	0.051	0.304	9.04e-129	-0.253	down
MRPL48	5.52e-133	-1.15357	0.085	0.371	1.07e-128	-0.286	down
EXOSC3	5.76e-133	-1.36123	0.064	0.33	1.12e-128	-0.266	down
AP2S1	6.64e-133	-1.08761	0.427	0.723	1.29e-128	-0.296	down
DRG1	1.24e-132	-1.06137	0.198	0.545	2.4e-128	-0.347	down
AK6	1.85e-132	-1.1462	0.087	0.375	3.59e-128	-0.288	down
TFB2M	1.86e-132	-1.12872	0.062	0.329	3.61e-128	-0.267	down
CAMLG	2e-132	-1.22554	0.091	0.381	3.88e-128	-0.29	down
SRFBP1	2.87e-132	-0.978076	0.087	0.377	5.58e-128	-0.29	ns
H2AC12	6.7e-132	-1.3243	0.075	0.35	1.3e-127	-0.275	down
HNRNPA3	7.23e-132	-1.0321	0.192	0.542	1.4e-127	-0.35	down
DNTTIP2	7.71e-132	-0.8925	0.105	0.411	1.5e-127	-0.306	ns
DHRS9	1.02e-131	4.40077	0.208	0.012	1.97e-127	0.196	up
ENSBTAG00000050943	1.11e-131	-1.51662	0.054	0.308	2.15e-127	-0.254	down
CENPS	2.17e-131	-1.03771	0.158	0.494	4.21e-127	-0.336	down
TRMT6	3.26e-131	-1.08503	0.065	0.331	6.33e-127	-0.266	down
ADGRE5	4.66e-131	4.43136	0.207	0.012	9.03e-127	0.195	up
TMED4	4.73e-131	-1.12515	0.204	0.534	9.18e-127	-0.33	down
CKMT1A	4.31e-130	2.87981	0.422	0.192	8.37e-126	0.23	up
UGCG	4.51e-130	-0.815234	0.133	0.457	8.75e-126	-0.324	ns
MRPS15	4.75e-130	-1.11726	0.147	0.471	9.22e-126	-0.324	down
RENBP	1.09e-129	-1.21448	0.119	0.42	2.12e-125	-0.301	down
PLA2G12A	1.55e-129	-1.20879	0.073	0.343	3.01e-125	-0.27	down
ZNF106	2.03e-129	-0.884231	0.134	0.455	3.94e-125	-0.321	ns
B9D1	2.51e-129	-1.08574	0.085	0.366	4.87e-125	-0.281	down
CENPI	2.62e-129	-0.813349	0.099	0.396	5.08e-125	-0.297	ns
RPP38	3.42e-129	-1.31233	0.056	0.31	6.64e-125	-0.254	down
RNASE1.1	4.29e-129	2.57915	0.368	0.12	8.32e-125	0.248	up
NDUFA4	4.65e-129	-0.626861	0.793	0.938	9.03e-125	-0.145	ns
TSFM	4.77e-129	-1.22113	0.085	0.365	9.26e-125	-0.28	down
ENSBTAG00000047265	5.17e-129	-1.05199	0.325	0.674	1e-124	-0.349	down
TTC1	5.5e-129	-1.01019	0.162	0.492	1.07e-124	-0.33	down
TSPO	7.34e-129	3.5977	0.307	0.079	1.42e-124	0.228	up
NME1	8.36e-129	-1.05721	0.311	0.653	1.62e-124	-0.342	down
NTMT1	1.12e-128	-1.10754	0.135	0.449	2.17e-124	-0.314	down
ENSBTAG00000032057	1.58e-128	-1.20688	0.076	0.347	3.07e-124	-0.271	down
COX7A2L	1.63e-128	-0.976567	0.388	0.714	3.17e-124	-0.326	ns
MRPL12	1.73e-128	-1.02973	0.364	0.687	3.36e-124	-0.323	down
MRPS17	2.14e-128	-1.07509	0.141	0.462	4.14e-124	-0.321	down
ATP6V1C2	2.22e-128	-2.12723	0.011	0.206	4.31e-124	-0.195	down
MRPL15	5.6e-128	-1.05757	0.147	0.469	1.09e-123	-0.322	down
MOCS2	5.65e-128	-1.04524	0.076	0.349	1.1e-123	-0.273	down
TRMT2A	7.38e-128	-1.02024	0.106	0.402	1.43e-123	-0.296	down
STOM	8.4e-128	-1.5464	0.038	0.27	1.63e-123	-0.232	down
ENTPD1	8.6e-128	-0.950074	0.131	0.445	1.67e-123	-0.314	ns
GUF1	1.1e-127	-1.11772	0.049	0.294	2.14e-123	-0.245	down
TYMS	1.47e-127	-0.933245	0.119	0.427	2.85e-123	-0.308	ns
NUFIP1	1.65e-127	-0.969108	0.067	0.333	3.2e-123	-0.266	ns
PRDX2	1.66e-127	-0.702514	0.679	0.891	3.23e-123	-0.212	ns
LIMK2	2.37e-127	1.79111	0.611	0.479	4.59e-123	0.132	ns
LLPH	2.45e-127	-1.06607	0.213	0.563	4.76e-123	-0.35	down
GLIPR1	3.02e-127	-1.00644	0.126	0.432	5.86e-123	-0.306	down
IFT20	3.5e-127	-0.997628	0.178	0.516	6.79e-123	-0.338	ns
RPP21	5.59e-127	-1.16378	0.083	0.36	1.09e-122	-0.277	down
TCF7L1	5.71e-127	2.25089	0.583	0.418	1.11e-122	0.165	up
PITPNA	5.72e-127	-1.08505	0.045	0.286	1.11e-122	-0.241	down
MTHFD1L	6.25e-127	-2.69041	0.006	0.192	1.21e-122	-0.186	down
POLR2D	7.43e-127	-0.976545	0.162	0.492	1.44e-122	-0.33	ns
GUCA1A	9.12e-127	-3.73221	0.003	0.182	1.77e-122	-0.179	down
YBX3	9.45e-127	-0.985317	0.09	0.374	1.83e-122	-0.284	ns
B4GALNT3	1.27e-126	-1.87684	0.016	0.218	2.47e-122	-0.202	down
UBE2V2	1.46e-126	-1.07328	0.141	0.458	2.82e-122	-0.317	down
SDAD1	1.49e-126	-0.945981	0.075	0.347	2.89e-122	-0.272	ns
TAT	1.8e-126	-0.891172	0.103	0.398	3.49e-122	-0.295	ns
POLB	2.03e-126	-1.07851	0.071	0.336	3.94e-122	-0.265	down
MYO1C	2.23e-126	-1.04788	0.064	0.323	4.33e-122	-0.259	down
GPD2	2.61e-126	-0.997272	0.152	0.478	5.06e-122	-0.326	ns
ELOC	2.9e-126	-1.0185	0.317	0.67	5.63e-122	-0.353	down
MDP1	2.94e-126	-1.16355	0.066	0.327	5.71e-122	-0.261	down
SYNCRIP	3.31e-126	-0.847536	0.166	0.5	6.42e-122	-0.334	ns
PPP1CC	3.35e-126	-0.943716	0.138	0.455	6.5e-122	-0.317	ns
CCNB1	4.45e-126	-1.03671	0.18	0.516	8.63e-122	-0.336	down
LRPAP1	6.22e-126	-1.08248	0.393	0.688	1.21e-121	-0.295	down
SNRPG	6.58e-126	-0.802872	0.578	0.853	1.28e-121	-0.275	ns
MMGT1	7.77e-126	-1.54864	0.043	0.278	1.51e-121	-0.235	down
G3BP1	8.36e-126	-0.851492	0.151	0.477	1.62e-121	-0.326	ns
LUC7L	1.52e-125	-0.858436	0.197	0.547	2.94e-121	-0.35	ns
CLSPN	1.65e-125	-1.16715	0.046	0.286	3.2e-121	-0.24	down
TNFAIP8	2.73e-125	-1.41723	0.026	0.24	5.29e-121	-0.214	down
MRPL42	3.28e-125	-1.02143	0.11	0.405	6.36e-121	-0.295	down
NOC3L	3.31e-125	-0.921505	0.078	0.351	6.42e-121	-0.273	ns
HACD3	4.17e-125	-1.17244	0.055	0.302	8.09e-121	-0.247	down
MTFP1	4.27e-125	-1.53465	0.047	0.285	8.28e-121	-0.238	down
PDLIM1	4.62e-125	-0.869201	0.118	0.423	8.97e-121	-0.305	ns
MIS18A	5.21e-125	-1.12269	0.087	0.364	1.01e-120	-0.277	down
NDUFAF4	5.78e-125	-1.39056	0.056	0.304	1.12e-120	-0.248	down
TSR3	1.01e-124	-1.11578	0.116	0.414	1.97e-120	-0.298	down
ENSBTAG00000048861	1.06e-124	-4.7584	0	0.172	2.06e-120	-0.172	down
VPS29	1.09e-124	-1.01153	0.218	0.561	2.12e-120	-0.343	down
MRPL50	1.23e-124	-1.28619	0.1	0.382	2.39e-120	-0.282	down
PLBD2	2.28e-124	-0.973714	0.084	0.359	4.42e-120	-0.275	ns
EIF2B2	3.02e-124	-1.49923	0.05	0.289	5.86e-120	-0.239	down
JMJD6	5.17e-124	-1.08499	0.067	0.326	1e-119	-0.259	down
TCEA1	6e-124	-0.944466	0.151	0.474	1.16e-119	-0.323	ns
EXOSC7	7.07e-124	-1.1022	0.097	0.382	1.37e-119	-0.285	down
RP9	7.17e-124	-1.15965	0.071	0.333	1.39e-119	-0.262	down
UBA52	7.95e-124	-0.392045	0.988	0.997	1.54e-119	-0.009	ns
RBIS	9.2e-124	-1.00367	0.163	0.489	1.78e-119	-0.326	down
MRPL43	1.16e-123	-0.990274	0.196	0.53	2.25e-119	-0.334	ns
PRXL2A	2.25e-123	0.712058	0.807	0.626	4.36e-119	0.181	ns
COX17	2.74e-123	-1.04853	0.186	0.521	5.31e-119	-0.335	down
EIF5	3.42e-123	-0.83288	0.478	0.768	6.63e-119	-0.29	ns
POP4	3.76e-123	-1.13484	0.066	0.322	7.3e-119	-0.256	down
RCC2	4.47e-123	-0.967085	0.168	0.497	8.68e-119	-0.329	ns
DDX46	5.05e-123	-0.871972	0.261	0.616	9.8e-119	-0.355	ns
CLIP1	5.45e-123	-0.996178	0.176	0.506	1.06e-118	-0.33	ns
APEX1	5.57e-123	-0.984708	0.278	0.624	1.08e-118	-0.346	ns
ENSBTAG00000039555	6.56e-123	-0.655831	0.747	0.911	1.27e-118	-0.164	ns
ARL14EP	6.63e-123	-0.9922	0.207	0.546	1.29e-118	-0.339	ns
AIMP2	7.14e-123	-0.982933	0.131	0.438	1.39e-118	-0.307	ns
C24H18orf32	7.53e-123	-1.05584	0.198	0.533	1.46e-118	-0.335	down
CD320	7.56e-123	-1.57536	0.033	0.253	1.47e-118	-0.22	down
GPATCH11	7.83e-123	-1.07364	0.074	0.339	1.52e-118	-0.265	down
ASIP	8.02e-123	-1.11959	0.119	0.415	1.56e-118	-0.296	down
TSR1	1.21e-122	-0.774415	0.111	0.41	2.35e-118	-0.299	ns
CUTC	1.24e-122	-0.922674	0.077	0.343	2.41e-118	-0.266	ns
TBC1D32	1.97e-122	-0.965219	0.405	0.726	3.81e-118	-0.321	ns
SCO2	3.05e-122	-1.08579	0.097	0.378	5.91e-118	-0.281	down
MYZAP	6.99e-122	-1.08202	0.042	0.272	1.36e-117	-0.23	down
ATAD3A	8.71e-122	-1.09897	0.093	0.37	1.69e-117	-0.277	down
AIF1	1.33e-121	3.56488	0.252	0.043	2.58e-117	0.209	up
HMGB2	1.46e-121	-1.00136	0.274	0.622	2.84e-117	-0.348	down
PTRH2	1.64e-121	-0.962305	0.145	0.461	3.17e-117	-0.316	ns
ENSBTAG00000054222	1.73e-121	-1.19146	0.069	0.325	3.36e-117	-0.256	down
ALDH7A1	1.96e-121	-0.881452	0.133	0.441	3.8e-117	-0.308	ns
RPL38	2.14e-121	-0.538277	0.933	0.983	4.15e-117	-0.05	ns
GMPR	3.51e-121	-2.63256	0.009	0.192	6.81e-117	-0.183	down
NOP58	3.78e-121	-0.911468	0.331	0.684	7.33e-117	-0.353	ns
MRPS22	3.92e-121	-1.0315	0.071	0.33	7.6e-117	-0.259	down
ENSBTAG00000019801	4.29e-121	-4.45326	0.001	0.171	8.32e-117	-0.17	down
DNAJC25	6.12e-121	-0.86681	0.089	0.364	1.19e-116	-0.275	ns
YAE1	7.23e-121	-1.84355	0.034	0.251	1.4e-116	-0.217	down
CCT5	7.92e-121	-0.91021	0.408	0.735	1.54e-116	-0.327	ns
ENSBTAG00000001219	1.07e-120	-2.47924	0.03	0.239	2.07e-116	-0.209	down
RAB11FIP4	1.12e-120	-0.877888	0.057	0.303	2.18e-116	-0.246	ns
NDUFB4	1.14e-120	-0.964275	0.372	0.72	2.21e-116	-0.348	ns
ACSL4	1.6e-120	-1.70615	0.022	0.223	3.1e-116	-0.201	down
MICU3	1.63e-120	-2.77571	0.008	0.189	3.17e-116	-0.181	down
EIF2S2	1.69e-120	-0.773802	0.586	0.838	3.28e-116	-0.252	ns
ENTREP2	1.89e-120	-0.923316	0.141	0.449	3.68e-116	-0.308	ns
FUT6	5.77e-120	-2.67811	0.01	0.194	1.12e-115	-0.184	down
SLC6A20	6.13e-120	-1.10018	0.069	0.321	1.19e-115	-0.252	down
METTL1	6.66e-120	-1.24524	0.06	0.306	1.29e-115	-0.246	down
UBLCP1	1.13e-119	-0.867112	0.142	0.453	2.2e-115	-0.311	ns
PTPMT1	1.15e-119	-1.08644	0.098	0.377	2.23e-115	-0.279	down
YWHAQ	1.16e-119	-0.723243	0.587	0.823	2.25e-115	-0.236	ns
NKAP	1.21e-119	-1.32796	0.041	0.266	2.35e-115	-0.225	down
NUDT5	1.26e-119	-1.01375	0.135	0.439	2.45e-115	-0.304	down
NAPEPLD	1.4e-119	-2.75016	0.003	0.175	2.72e-115	-0.172	down
ARL5A	1.57e-119	-0.829075	0.074	0.335	3.04e-115	-0.261	ns
SNU13	2.02e-119	-0.966266	0.35	0.688	3.92e-115	-0.338	ns
SNRNP70	3.51e-119	-0.913503	0.107	0.395	6.8e-115	-0.288	ns
HCCS	4.07e-119	-1.05444	0.094	0.369	7.89e-115	-0.275	down
TIMM44	5.36e-119	-0.890462	0.236	0.583	1.04e-114	-0.347	ns
RPS4X	6.46e-119	-0.451918	0.945	0.979	1.25e-114	-0.034	ns
ANP32E	7.45e-119	-0.939483	0.237	0.579	1.45e-114	-0.342	ns
PRPSAP2	7.99e-119	-1.08322	0.049	0.282	1.55e-114	-0.233	down
ABCC1	8.43e-119	-1.88807	0.016	0.206	1.64e-114	-0.19	down
UFM1	8.97e-119	-0.949823	0.132	0.435	1.74e-114	-0.303	ns
MRPL30	1.07e-118	-0.869094	0.111	0.4	2.07e-114	-0.289	ns
RRS1	1.46e-118	-1.1047	0.086	0.353	2.84e-114	-0.267	down
EIF1AX	1.48e-118	-0.797621	0.546	0.812	2.88e-114	-0.266	ns
MTR	1.7e-118	-1.34253	0.031	0.243	3.31e-114	-0.212	down
DOLK	1.79e-118	-1.10103	0.05	0.284	3.47e-114	-0.234	down
YWHAH	2.32e-118	-0.830285	0.186	0.523	4.51e-114	-0.337	ns
CCDC34	3.05e-118	-0.914228	0.083	0.35	5.92e-114	-0.267	ns
NUP37	4e-118	-0.92559	0.063	0.31	7.77e-114	-0.247	ns
MYBBP1A	4.22e-118	-0.956577	0.049	0.283	8.19e-114	-0.234	ns
BRI3	4.96e-118	-0.881744	0.441	0.731	9.63e-114	-0.29	ns
EIF1B	1.2e-117	-0.983959	0.149	0.457	2.32e-113	-0.308	ns
CFDP2	1.2e-117	-0.859992	0.125	0.422	2.33e-113	-0.297	ns
RRP9	1.54e-117	-1.11044	0.065	0.311	2.99e-113	-0.246	down
ABHD11	2.53e-117	-0.989255	0.169	0.485	4.91e-113	-0.316	ns
AGPAT3	3.74e-117	-0.845588	0.122	0.417	7.26e-113	-0.295	ns
TMX2	4.61e-117	-0.920839	0.107	0.391	8.95e-113	-0.284	ns
LMO1	5.12e-117	-0.991445	0.251	0.576	9.94e-113	-0.325	ns
ZCCHC9	6.25e-117	-1.08113	0.073	0.326	1.21e-112	-0.253	down
METTL5	6.41e-117	-1.18747	0.073	0.326	1.24e-112	-0.253	down
ACP1	6.54e-117	-0.923094	0.18	0.505	1.27e-112	-0.325	ns
MYG1	6.86e-117	-0.96849	0.085	0.349	1.33e-112	-0.264	ns
WDR55	7.59e-117	-0.903901	0.13	0.431	1.47e-112	-0.301	ns
TRMT112	8.17e-117	-0.977103	0.317	0.652	1.58e-112	-0.335	ns
RPIA	9.45e-117	-2.08551	0.015	0.203	1.83e-112	-0.188	down
PITHD1	1.53e-116	-0.940543	0.127	0.422	2.96e-112	-0.295	ns
PGAP1	2.04e-116	-1.38729	0.024	0.224	3.96e-112	-0.2	down
WBP4	2.06e-116	-0.90138	0.151	0.462	4e-112	-0.311	ns
GRPEL1	2.5e-116	-0.914711	0.16	0.474	4.85e-112	-0.314	ns
EFNA5	3.04e-116	3.16878	0.351	0.128	5.9e-112	0.223	up
RABGGTB	3.74e-116	-0.936159	0.134	0.434	7.26e-112	-0.3	ns
ENSBTAG00000002290	4.01e-116	-0.780264	0.071	0.325	7.78e-112	-0.254	ns
COA3	4.29e-116	-0.900375	0.408	0.724	8.31e-112	-0.316	ns
PRPS1	5.46e-116	-1.12574	0.08	0.339	1.06e-111	-0.259	down
LMNB1	5.63e-116	-0.853165	0.072	0.325	1.09e-111	-0.253	ns
SMIM8	5.79e-116	-1.1587	0.109	0.388	1.12e-111	-0.279	down
MCOLN2	5.85e-116	-0.82793	0.069	0.32	1.14e-111	-0.251	ns
PIN4	8.06e-116	-0.925282	0.158	0.472	1.56e-111	-0.314	ns
DNAJC19	9.38e-116	-0.940307	0.183	0.506	1.82e-111	-0.323	ns
DNAJC24	1.37e-115	-1.26134	0.043	0.264	2.65e-111	-0.221	down
PPIH	1.68e-115	-0.948475	0.198	0.524	3.26e-111	-0.326	ns
TSN	1.7e-115	-0.855239	0.142	0.447	3.29e-111	-0.305	ns
HNRNPDL	1.85e-115	-0.888349	0.352	0.681	3.59e-111	-0.329	ns
RXYLT1	1.87e-115	-0.977964	0.071	0.321	3.62e-111	-0.25	ns
ARHGAP18	2.16e-115	-0.896018	0.068	0.317	4.2e-111	-0.249	ns
COX20	2.17e-115	-1.04765	0.092	0.359	4.21e-111	-0.267	down
COA6	2.2e-115	-1.44001	0.065	0.307	4.27e-111	-0.242	down
DIMT1	3.35e-115	-1.22522	0.038	0.254	6.5e-111	-0.216	down
PTGES	3.47e-115	-1.07284	0.071	0.32	6.73e-111	-0.249	down
COQ10B	3.56e-115	-0.948395	0.088	0.352	6.91e-111	-0.264	ns
ENSBTAG00000019994	3.78e-115	-0.974771	0.101	0.375	7.34e-111	-0.274	ns
NVL	4.21e-115	-0.678344	0.073	0.327	8.18e-111	-0.254	ns
KRT8	4.34e-115	-0.407592	1	0.998	8.41e-111	0.002	ns
CTNS	5.61e-115	-0.907989	0.054	0.289	1.09e-110	-0.235	ns
LSM4	5.81e-115	-0.943957	0.362	0.685	1.13e-110	-0.323	ns
CCNH	8.42e-115	-1.42248	0.038	0.253	1.63e-110	-0.215	down
BCAT1	8.58e-115	-1.02813	0.048	0.275	1.66e-110	-0.227	down
PIM3	9.09e-115	-0.976799	0.081	0.339	1.76e-110	-0.258	ns
TRMT10C	9.56e-115	-1.01409	0.07	0.318	1.85e-110	-0.248	down
SIPA1L1	1.06e-114	3.66245	0.344	0.128	2.05e-110	0.216	up
SBDS	1.12e-114	-0.867769	0.089	0.355	2.16e-110	-0.266	ns
NOP2	1.21e-114	-0.769547	0.118	0.409	2.35e-110	-0.291	ns
ENSBTAG00000049772	1.78e-114	-1.60137	0.025	0.222	3.45e-110	-0.197	down
DNAJC8	1.87e-114	-0.769872	0.168	0.491	3.63e-110	-0.323	ns
PLEKHF1	2.44e-114	-1.87424	0.024	0.221	4.73e-110	-0.197	down
KIF2C	3.31e-114	-0.907134	0.066	0.311	6.42e-110	-0.245	ns
MRPL24	3.37e-114	-0.998582	0.11	0.39	6.53e-110	-0.28	ns
CYP51A1	4.49e-114	2.97521	0.34	0.119	8.71e-110	0.221	up
DPPA2	5.25e-114	-4.11242	0.001	0.16	1.02e-109	-0.159	down
RPS14	5.6e-114	-0.343999	0.995	0.997	1.09e-109	-0.002	ns
BET1	9.02e-114	-0.930169	0.113	0.395	1.75e-109	-0.282	ns
ATP5PF	9.27e-114	-0.761783	0.584	0.82	1.8e-109	-0.236	ns
SURF6	9.34e-114	-0.818458	0.113	0.397	1.81e-109	-0.284	ns
DCBLD1	1.03e-113	-0.748458	0.109	0.39	1.99e-109	-0.281	ns
GCLM	1.21e-113	-1.07866	0.069	0.315	2.35e-109	-0.246	down
GEMIN6	1.52e-113	-1.23542	0.049	0.274	2.95e-109	-0.225	down
C8H9orf85	1.75e-113	-0.959482	0.058	0.293	3.4e-109	-0.235	ns
EMC6	1.95e-113	-0.929479	0.275	0.611	3.79e-109	-0.336	ns
POLD3	2.26e-113	-0.811762	0.06	0.299	4.38e-109	-0.239	ns
ATP5F1C	2.32e-113	-0.735571	0.582	0.813	4.5e-109	-0.231	ns
TMEM126B	2.58e-113	-0.979707	0.087	0.349	5e-109	-0.262	ns
NUP214	2.91e-113	-1.33204	0.082	0.333	5.65e-109	-0.251	down
YWHAE	3.66e-113	-0.599869	0.724	0.896	7.1e-109	-0.172	ns
UTP23	4.84e-113	-1.25471	0.047	0.27	9.39e-109	-0.223	down
RCL1	5.11e-113	-0.941636	0.055	0.287	9.91e-109	-0.232	ns
ITGB1BP1	5.57e-113	-0.806771	0.119	0.407	1.08e-108	-0.288	ns
MRPS10	1.27e-112	-0.886868	0.144	0.445	2.46e-108	-0.301	ns
TIMM10	1.68e-112	-0.92205	0.339	0.671	3.25e-108	-0.332	ns
SNX2	1.79e-112	-0.815153	0.213	0.543	3.46e-108	-0.33	ns
SNRPC	1.94e-112	-0.921698	0.32	0.657	3.76e-108	-0.337	ns
SCML4	1.96e-112	-1.8183	0.023	0.214	3.81e-108	-0.191	down
INPP4B	2.94e-112	-2.08807	0.012	0.189	5.7e-108	-0.177	down
ZDHHC3	3.33e-112	-0.74087	0.138	0.44	6.46e-108	-0.302	ns
FAM133B	4.23e-112	-0.828747	0.174	0.494	8.2e-108	-0.32	ns
RAB34	4.42e-112	-0.899065	0.171	0.485	8.57e-108	-0.314	ns
RNASEH1	4.65e-112	-0.847274	0.097	0.366	9.02e-108	-0.269	ns
METTL9	5.39e-112	-1.54949	0.029	0.229	1.05e-107	-0.2	down
GTF2A2	7.63e-112	-0.998169	0.163	0.47	1.48e-107	-0.307	ns
RAP1B	7.7e-112	1.47903	0.647	0.566	1.49e-107	0.081	ns
FAM162A	8.48e-112	-0.954474	0.272	0.609	1.64e-107	-0.337	ns
H3-3B	9.59e-112	-0.620343	0.692	0.868	1.86e-107	-0.176	ns
RAB11A	1.13e-111	-0.798164	0.509	0.781	2.2e-107	-0.272	ns
IMPDH2	1.53e-111	-0.905911	0.332	0.667	2.96e-107	-0.335	ns
CTSA	1.63e-111	-0.839197	0.087	0.345	3.16e-107	-0.258	ns
ATP6	1.66e-111	0.565311	0.998	0.987	3.22e-107	0.011	ns
IER3IP1	1.95e-111	-0.903844	0.133	0.424	3.78e-107	-0.291	ns
SMN2	2.23e-111	-0.908293	0.105	0.377	4.32e-107	-0.272	ns
MTRF1L	2.39e-111	-0.840026	0.08	0.333	4.64e-107	-0.253	ns
BAIAP2	3.79e-111	-0.655205	0.102	0.376	7.35e-107	-0.274	ns
RBM8A	5.42e-111	-0.910367	0.38	0.705	1.05e-106	-0.325	ns
DCUN1D5	5.6e-111	-0.678753	0.092	0.357	1.09e-106	-0.265	ns
DNAJC21	5.79e-111	-0.88125	0.09	0.351	1.12e-106	-0.261	ns
ADSS2	5.8e-111	-0.824648	0.128	0.417	1.12e-106	-0.289	ns
PDCD6	8.2e-111	-0.907711	0.376	0.691	1.59e-106	-0.315	ns
SLC66A2	8.41e-111	-1.01845	0.045	0.264	1.63e-106	-0.219	down
RBM17	8.6e-111	-1.02589	0.06	0.293	1.67e-106	-0.233	down
NME2	1.09e-110	-0.559798	0.831	0.941	2.11e-106	-0.11	ns
SNRPB	1.11e-110	-0.86476	0.454	0.755	2.16e-106	-0.301	ns
GPR157	1.26e-110	-2.20698	0.009	0.178	2.45e-106	-0.169	down
VTI1B	1.28e-110	-0.917004	0.298	0.636	2.48e-106	-0.338	ns
PDGFA	1.99e-110	-1.20984	0.057	0.286	3.86e-106	-0.229	down
CKS2	2.48e-110	-0.892451	0.384	0.719	4.82e-106	-0.335	ns
TRMT10B	2.78e-110	-1.10561	0.055	0.281	5.4e-106	-0.226	down
RPS21	3.38e-110	-0.546333	0.909	0.969	6.55e-106	-0.06	ns
MRPL18	3.73e-110	-0.956565	0.139	0.433	7.23e-106	-0.294	ns
MRPL3	3.99e-110	-0.759791	0.126	0.414	7.74e-106	-0.288	ns
CHCHD2	4.69e-110	-0.645516	0.675	0.873	9.09e-106	-0.198	ns
GPN3	5.95e-110	-1.24225	0.045	0.261	1.16e-105	-0.216	down
EMC4	6.08e-110	-0.985091	0.154	0.447	1.18e-105	-0.293	ns
PTRHD1	6.55e-110	-1.13856	0.087	0.342	1.27e-105	-0.255	down
MFAP1	8.13e-110	-0.868956	0.099	0.366	1.58e-105	-0.267	ns
BCS1L	8.42e-110	-1.02683	0.118	0.395	1.63e-105	-0.277	down
SOX15	1.04e-109	-1.5376	0.036	0.241	2.01e-105	-0.205	down
CLCC1	1.04e-109	-0.845638	0.055	0.284	2.02e-105	-0.229	ns
KIAA1143	1.21e-109	-1.14605	0.064	0.297	2.35e-105	-0.233	down
ACADM	1.32e-109	-0.915264	0.056	0.284	2.55e-105	-0.228	ns
RPL26L1	1.37e-109	-0.943355	0.207	0.53	2.66e-105	-0.323	ns
BCAS2	1.48e-109	-0.858253	0.139	0.435	2.87e-105	-0.296	ns
ENSBTAG00000026119	1.55e-109	-1.10538	0.153	0.451	3.01e-105	-0.298	down
TFAM	2.14e-109	-1.10155	0.049	0.269	4.15e-105	-0.22	down
CDK2AP1	2.33e-109	-0.819123	0.111	0.385	4.53e-105	-0.274	ns
GTSF1	2.35e-109	-1.425	0.064	0.294	4.56e-105	-0.23	down
PSMD12	2.91e-109	-0.802246	0.218	0.55	5.65e-105	-0.332	ns
SKP1	3.26e-109	-0.833081	0.097	0.362	6.33e-105	-0.265	ns
CEPT1	3.31e-109	-0.529783	0.081	0.334	6.43e-105	-0.253	ns
LSM8	4.18e-109	-0.960661	0.188	0.5	8.11e-105	-0.312	ns
SEPHS1	4.49e-109	-0.873624	0.087	0.341	8.72e-105	-0.254	ns
ING2	5.15e-109	-0.780749	0.068	0.306	9.98e-105	-0.238	ns
UTP11	7.06e-109	-0.857395	0.172	0.483	1.37e-104	-0.311	ns
POLR1C	8.68e-109	-0.859881	0.081	0.331	1.68e-104	-0.25	ns
ELOA	9e-109	-0.954881	0.048	0.267	1.75e-104	-0.219	ns
PIGW	9.01e-109	-0.799457	0.092	0.352	1.75e-104	-0.26	ns
NGDN	9.32e-109	-0.989403	0.08	0.328	1.81e-104	-0.248	ns
ATP5MK	1.01e-108	-0.742922	0.676	0.886	1.96e-104	-0.21	ns
DBF4	1.05e-108	-0.766435	0.097	0.362	2.03e-104	-0.265	ns
LTV1	1.32e-108	-0.684529	0.063	0.297	2.57e-104	-0.234	ns
AATF	1.36e-108	-0.621314	0.091	0.353	2.63e-104	-0.262	ns
SLC38A6	1.61e-108	-0.772139	0.093	0.355	3.12e-104	-0.262	ns
PTDSS2	1.66e-108	-0.8447	0.108	0.379	3.22e-104	-0.271	ns
KIAA0825	1.66e-108	-1.20574	0.043	0.255	3.23e-104	-0.212	down
SELENOK	1.78e-108	-0.858325	0.19	0.508	3.46e-104	-0.318	ns
UCHL3	2.18e-108	-0.877834	0.23	0.563	4.23e-104	-0.333	ns
NDUFV3	3.3e-108	-0.914703	0.285	0.613	6.41e-104	-0.328	ns
CPNE3	4.78e-108	-0.923961	0.125	0.402	9.27e-104	-0.277	ns
UBE2F	5.43e-108	-0.758394	0.15	0.452	1.05e-103	-0.302	ns
LZTS1	5.66e-108	-2.70258	0.004	0.162	1.1e-103	-0.158	down
ARHGAP28	6.84e-108	-0.94769	0.041	0.251	1.33e-103	-0.21	ns
MMP23	6.95e-108	-1.07822	0.073	0.313	1.35e-103	-0.24	down
LYRM7	7.02e-108	-0.974508	0.09	0.344	1.36e-103	-0.254	ns
FAM136A	7.16e-108	-0.844315	0.13	0.417	1.39e-103	-0.287	ns
MYLIP	8.39e-108	-0.59203	0.082	0.334	1.63e-103	-0.252	ns
ACAT1	1.4e-107	-0.913447	0.072	0.312	2.71e-103	-0.24	ns
CALD1	1.65e-107	-0.772464	0.472	0.768	3.2e-103	-0.296	ns
FAM98A	1.71e-107	-0.687144	0.146	0.446	3.31e-103	-0.3	ns
SPRING1	1.78e-107	-0.910452	0.111	0.382	3.46e-103	-0.271	ns
MCUR1	2.78e-107	-1.27893	0.047	0.261	5.4e-103	-0.214	down
TFEB	3.03e-107	-1.63849	0.021	0.205	5.88e-103	-0.184	down
ADGRL3	3.18e-107	3.10494	0.383	0.177	6.17e-103	0.206	up
EIF2B4	3.21e-107	-0.953564	0.089	0.343	6.22e-103	-0.254	ns
PDCD10	3.28e-107	-0.822779	0.25	0.587	6.37e-103	-0.337	ns
MED10	3.34e-107	-1.024	0.092	0.347	6.49e-103	-0.255	down
P2RY2	3.73e-107	-1.09335	0.047	0.262	7.23e-103	-0.215	down
DEGS1	4.15e-107	-0.906543	0.306	0.628	8.04e-103	-0.322	ns
HPF1	4.27e-107	-0.821838	0.135	0.422	8.28e-103	-0.287	ns
CEBPZ	5.11e-107	-0.607519	0.203	0.536	9.92e-103	-0.333	ns
SNAP29	6.16e-107	-1.09056	0.065	0.298	1.2e-102	-0.233	down
PES1	6.79e-107	-0.799847	0.126	0.409	1.32e-102	-0.283	ns
KATNA1	7.55e-107	-0.584531	0.083	0.336	1.46e-102	-0.253	ns
RAD23B	7.72e-107	-0.90218	0.323	0.649	1.5e-102	-0.326	ns
DDX27	8.72e-107	-0.802427	0.242	0.577	1.69e-102	-0.335	ns
RHEB	9.63e-107	-0.943901	0.081	0.327	1.87e-102	-0.246	ns
PRPF38B	1.21e-106	-0.661895	0.114	0.391	2.35e-102	-0.277	ns
ARF4	1.25e-106	-0.654593	0.132	0.422	2.42e-102	-0.29	ns
ENSBTAG00000038368	1.27e-106	-1.43573	0.033	0.229	2.46e-102	-0.196	down
RIOK1	1.46e-106	-1.02664	0.033	0.231	2.83e-102	-0.198	down
SRSF7	1.67e-106	-0.827372	0.329	0.669	3.24e-102	-0.34	ns
WDR83	2.92e-106	-0.940029	0.094	0.35	5.67e-102	-0.256	ns
ARG2	3.1e-106	-2.07099	0.01	0.176	6.02e-102	-0.166	down
DKC1	3.87e-106	-0.823531	0.472	0.75	7.5e-102	-0.278	ns
NDUFA2	3.93e-106	-0.883959	0.408	0.726	7.63e-102	-0.318	ns
RAB9A	4.21e-106	-0.870409	0.091	0.345	8.17e-102	-0.254	ns
ENSBTAG00000047990	7.08e-106	-3.1418	0.009	0.173	1.37e-101	-0.164	down
HSPA9	7.61e-106	-0.598694	0.144	0.444	1.48e-101	-0.3	ns
TRMT11	7.92e-106	-0.724082	0.064	0.295	1.54e-101	-0.231	ns
NAF1	8.29e-106	-0.745458	0.087	0.338	1.61e-101	-0.251	ns
MRPL39	1.36e-105	-0.80739	0.141	0.43	2.65e-101	-0.289	ns
ORC6	1.4e-105	-1.30478	0.04	0.243	2.72e-101	-0.203	down
RPS27	2.57e-105	-0.445014	0.969	0.99	4.99e-101	-0.021	ns
JADE1	3.51e-105	-1.53456	0.024	0.209	6.81e-101	-0.185	down
HSD17B11	3.51e-105	-1.23174	0.029	0.219	6.81e-101	-0.19	down
RARS1	3.74e-105	-0.631102	0.17	0.48	7.26e-101	-0.31	ns
ERICH4	4.14e-105	-2.62526	0.005	0.162	8.04e-101	-0.157	down
MRPS30	4.72e-105	-0.956633	0.065	0.295	9.15e-101	-0.23	ns
FAM172A	4.95e-105	-0.783014	0.05	0.267	9.61e-101	-0.217	ns
MRPL53	5.27e-105	-0.967427	0.224	0.538	1.02e-100	-0.314	ns
PDCL3	6.12e-105	-0.852913	0.175	0.481	1.19e-100	-0.306	ns
EEF1D	7.91e-105	-0.519106	0.792	0.927	1.53e-100	-0.135	ns
SLC66A3	8.4e-105	-0.984667	0.048	0.26	1.63e-100	-0.212	ns
ENY2	1.06e-104	-0.871659	0.276	0.61	2.05e-100	-0.334	ns
ENSBTAG00000053829	1.07e-104	-1.14455	0.051	0.265	2.07e-100	-0.214	down
MRPS34	1.29e-104	-1.0465	0.063	0.291	2.5e-100	-0.228	down
SORBS2	2.64e-104	4.45532	0.162	0.007	5.12e-100	0.155	up
SLC7A5	3.82e-104	-1.19073	0.023	0.205	7.41e-100	-0.182	down
MIPEP	3.95e-104	-0.834046	0.069	0.301	7.67e-100	-0.232	ns
EXOSC1	4.36e-104	-1.05015	0.066	0.293	8.47e-100	-0.227	down
TRNT1	4.87e-104	-0.687037	0.12	0.396	9.45e-100	-0.276	ns
AK1	5.18e-104	-2.24538	0.008	0.167	1.01e-99	-0.159	down
HMGA1	5.78e-104	-0.694359	0.606	0.84	1.12e-99	-0.234	ns
MPHOSPH6	5.98e-104	-0.800618	0.132	0.415	1.16e-99	-0.283	ns
TMEM150A	6.17e-104	-0.920894	0.116	0.386	1.2e-99	-0.27	ns
MRTO4	6.52e-104	-0.862793	0.249	0.57	1.27e-99	-0.321	ns
CDC16	7.54e-104	-0.592636	0.101	0.365	1.46e-99	-0.264	ns
ARL8B	8.76e-104	-0.631416	0.073	0.31	1.7e-99	-0.237	ns
MFAP5	8.95e-104	-2.44297	0.007	0.165	1.74e-99	-0.158	down
PDSS1	9.58e-104	-0.96049	0.053	0.269	1.86e-99	-0.216	ns
ST8SIA6	1.13e-103	-1.59219	0.014	0.182	2.19e-99	-0.168	down
SPR	1.21e-103	-0.901564	0.099	0.356	2.34e-99	-0.257	ns
PPIF	1.25e-103	-1.02495	0.073	0.308	2.43e-99	-0.235	down
WDR74	1.29e-103	-0.746405	0.105	0.369	2.51e-99	-0.264	ns
ADIPOR2	1.33e-103	-0.728224	0.086	0.335	2.57e-99	-0.249	ns
MOGAT1	1.38e-103	-1.36485	0.089	0.326	2.67e-99	-0.237	down
C6H4orf3	1.87e-103	-0.843099	0.424	0.73	3.62e-99	-0.306	ns
NDUFAF5	1.96e-103	-1.16886	0.042	0.245	3.8e-99	-0.203	down
DIS3	2.4e-103	-0.744187	0.063	0.289	4.65e-99	-0.226	ns
CCT6A	2.42e-103	-0.843817	0.343	0.67	4.7e-99	-0.327	ns
ACSL3	2.8e-103	-0.924735	0.358	0.662	5.44e-99	-0.304	ns
SELENOT	2.9e-103	-0.666485	0.157	0.456	5.63e-99	-0.299	ns
GCA	3.83e-103	-1.10627	0.047	0.256	7.42e-99	-0.209	down
GOLT1B	4.24e-103	-0.96469	0.06	0.282	8.22e-99	-0.222	ns
MALSU1	4.99e-103	-0.9605	0.054	0.271	9.68e-99	-0.217	ns
SAR1A	5.18e-103	-0.818887	0.126	0.402	1.01e-98	-0.276	ns
MRPL1	5.44e-103	-0.709751	0.163	0.464	1.05e-98	-0.301	ns
U2AF1	7.21e-103	-0.824425	0.374	0.701	1.4e-98	-0.327	ns
NDFIP1	8.32e-103	-0.583458	0.093	0.347	1.61e-98	-0.254	ns
SLC27A6	8.44e-103	-3.49573	0.014	0.178	1.64e-98	-0.164	down
RIOK2	9.87e-103	-0.89921	0.055	0.272	1.91e-98	-0.217	ns
NOPCHAP1	1.05e-102	-1.13463	0.057	0.274	2.04e-98	-0.217	down
PLBD1	1.14e-102	3.4551	0.31	0.109	2.21e-98	0.201	up
UTP18	1.19e-102	-0.679954	0.087	0.334	2.31e-98	-0.247	ns
SERP1	1.64e-102	-0.87174	0.366	0.682	3.19e-98	-0.316	ns
UQCC4	1.66e-102	-0.887034	0.192	0.497	3.22e-98	-0.305	ns
B4GALT1	1.71e-102	2.06826	0.529	0.399	3.32e-98	0.13	ns
SNX8	1.79e-102	-0.893939	0.274	0.585	3.47e-98	-0.311	ns
CS	1.8e-102	-0.691057	0.2	0.517	3.49e-98	-0.317	ns
EMG1	1.97e-102	-0.898218	0.229	0.545	3.81e-98	-0.316	ns
TACR3	2.03e-102	-1.24524	0.04	0.24	3.93e-98	-0.2	down
PEX3	2.27e-102	-1.60905	0.018	0.189	4.4e-98	-0.171	down
GCLC	2.27e-102	-0.493348	0.082	0.326	4.41e-98	-0.244	ns
ADIPOR1	4.35e-102	-0.845403	0.198	0.505	8.43e-98	-0.307	ns
FRG1	4.71e-102	-0.764003	0.082	0.323	9.13e-98	-0.241	ns
SRSF3	5.57e-102	-0.827009	0.259	0.594	1.08e-97	-0.335	ns
MPLKIP	5.62e-102	-0.959214	0.077	0.312	1.09e-97	-0.235	ns
INO80C	5.71e-102	-0.792063	0.11	0.374	1.11e-97	-0.264	ns
NOP14	7e-102	-0.667003	0.173	0.476	1.36e-97	-0.303	ns
CENPH	9.39e-102	-1.08359	0.057	0.273	1.82e-97	-0.216	down
DCAF13	1.06e-101	-0.651402	0.077	0.314	2.06e-97	-0.237	ns
CHURC1	1.17e-101	-0.840399	0.186	0.491	2.27e-97	-0.305	ns
U2SURP	1.2e-101	-0.587603	0.161	0.465	2.32e-97	-0.304	ns
RAB10	1.36e-101	-0.654817	0.187	0.499	2.63e-97	-0.312	ns
SRRM1	1.74e-101	-0.752893	0.274	0.612	3.37e-97	-0.338	ns
PSME3	2.03e-101	-0.677505	0.135	0.417	3.94e-97	-0.282	ns
E2F4	2.24e-101	-0.800783	0.065	0.289	4.34e-97	-0.224	ns
SMTN	2.25e-101	-1.02922	0.041	0.24	4.36e-97	-0.199	down
LAP3	2.32e-101	-0.921476	0.252	0.556	4.51e-97	-0.304	ns
VPS35	2.46e-101	-0.772231	0.191	0.497	4.76e-97	-0.306	ns
GPALPP1	2.81e-101	-0.774074	0.072	0.303	5.46e-97	-0.231	ns
LSM5	3.14e-101	-0.837282	0.307	0.641	6.09e-97	-0.334	ns
ZNHIT6	3.31e-101	-0.551337	0.111	0.379	6.42e-97	-0.268	ns
COPS8	3.71e-101	-0.750225	0.081	0.321	7.19e-97	-0.24	ns
HNRNPF	3.71e-101	-0.831059	0.428	0.733	7.2e-97	-0.305	ns
MRPL2	3.73e-101	-1.32632	0.046	0.25	7.23e-97	-0.204	down
PUS3	4.86e-101	-1.16723	0.036	0.229	9.43e-97	-0.193	down
UPF3B	6.2e-101	-0.790618	0.112	0.374	1.2e-96	-0.262	ns
FCHSD2	6.5e-101	-2.11155	0.028	0.209	1.26e-96	-0.181	down
SDF2	7.12e-101	-0.690826	0.153	0.444	1.38e-96	-0.291	ns
RPL39	7.76e-101	-0.34418	0.944	0.986	1.5e-96	-0.042	ns
MRPL51	1.02e-100	-0.843288	0.285	0.61	1.97e-96	-0.325	ns
RER1	1.04e-100	-0.880425	0.25	0.56	2.02e-96	-0.31	ns
CDIPT	1.05e-100	-0.714341	0.089	0.335	2.03e-96	-0.246	ns
LAMTOR3	1.09e-100	-0.71933	0.13	0.407	2.11e-96	-0.277	ns
ENSBTAG00000049814	1.13e-100	3.72178	0.304	0.107	2.2e-96	0.197	up
NUB1	1.25e-100	-0.851674	0.063	0.284	2.42e-96	-0.221	ns
DAB2	1.3e-100	-0.638571	0.586	0.814	2.53e-96	-0.228	ns
SYF2	1.36e-100	-0.675373	0.177	0.484	2.64e-96	-0.307	ns
RPP14	1.38e-100	-0.582911	0.066	0.292	2.68e-96	-0.226	ns
SDHD	1.55e-100	-0.761046	0.22	0.54	3.01e-96	-0.32	ns
COQ7	1.64e-100	-0.941288	0.075	0.307	3.18e-96	-0.232	ns
SLC25A6	1.77e-100	-0.467792	0.9	0.975	3.43e-96	-0.075	ns
SRPRB	1.82e-100	-0.696472	0.158	0.452	3.54e-96	-0.294	ns
GSR	2.21e-100	-0.597464	0.11	0.373	4.29e-96	-0.263	ns
TAF1D	2.37e-100	-0.612757	0.129	0.405	4.6e-96	-0.276	ns
ENSBTAG00000047441	3.14e-100	-1.15571	0.027	0.21	6.09e-96	-0.183	down
NLE1	4.02e-100	-1.34889	0.043	0.242	7.8e-96	-0.199	down
OSGIN1	4.32e-100	-1.57044	0.018	0.188	8.39e-96	-0.17	down
INIP	4.94e-100	-0.739353	0.091	0.338	9.58e-96	-0.247	ns
SRPRA	7.32e-100	-0.714426	0.202	0.517	1.42e-95	-0.315	ns
B2M	8.2e-100	-1.13369	0.101	0.345	1.59e-95	-0.244	down
TTC14	9.79e-100	-0.592355	0.104	0.361	1.9e-95	-0.257	ns
TP53RK	1.06e-99	-1.03741	0.073	0.302	2.06e-95	-0.229	down
EIF3J	1.26e-99	-0.85179	0.331	0.657	2.45e-95	-0.326	ns
DDX54	1.26e-99	-1.10117	0.05	0.257	2.45e-95	-0.207	down
RPL7L1	1.37e-99	-0.849836	0.336	0.65	2.66e-95	-0.314	ns
PRELID3B	1.54e-99	-0.742719	0.178	0.48	2.99e-95	-0.302	ns
OSTM1	1.58e-99	-0.883505	0.046	0.248	3.07e-95	-0.202	ns
MAX	1.6e-99	-1.0982	0.037	0.23	3.1e-95	-0.193	down
MRPL4	1.8e-99	-0.955005	0.054	0.266	3.48e-95	-0.212	ns
DDX39A	1.8e-99	-0.808768	0.249	0.572	3.49e-95	-0.323	ns
PEX16	1.81e-99	-0.736035	0.117	0.383	3.52e-95	-0.266	ns
SKA2	2.24e-99	-0.765859	0.12	0.387	4.34e-95	-0.267	ns
SEC63	2.34e-99	-0.774361	0.224	0.539	4.55e-95	-0.315	ns
PSMD9	2.7e-99	-0.85367	0.136	0.411	5.24e-95	-0.275	ns
MLEC	3.71e-99	-0.728663	0.097	0.347	7.2e-95	-0.25	ns
NOB1	6.68e-99	-0.787801	0.099	0.35	1.3e-94	-0.251	ns
COQ3	6.96e-99	-0.746751	0.066	0.288	1.35e-94	-0.222	ns
TK1	7.46e-99	-0.784112	0.132	0.407	1.45e-94	-0.275	ns
GMPS	9.02e-99	-0.5199	0.162	0.461	1.75e-94	-0.299	ns
MRPS28	9.67e-99	-0.618939	0.142	0.426	1.88e-94	-0.284	ns
H2AC20	1.01e-98	-0.921841	0.054	0.263	1.95e-94	-0.209	ns
ANXA6	1.09e-98	-0.81802	0.435	0.726	2.11e-94	-0.291	ns
GLRX5	1.65e-98	-0.810214	0.122	0.388	3.19e-94	-0.266	ns
ANAPC2	1.82e-98	-0.821817	0.075	0.303	3.53e-94	-0.228	ns
TMEM70	2.11e-98	-0.851435	0.083	0.318	4.09e-94	-0.235	ns
TBRG4	2.21e-98	-0.737389	0.119	0.383	4.28e-94	-0.264	ns
XRN2	2.68e-98	-0.576723	0.174	0.477	5.21e-94	-0.303	ns
SAMD8	2.95e-98	-0.550371	0.08	0.315	5.72e-94	-0.235	ns
WDR12	2.98e-98	-0.666786	0.091	0.335	5.79e-94	-0.244	ns
SINHCAF	3.12e-98	-0.557872	0.142	0.425	6.04e-94	-0.283	ns
CCT4	3.15e-98	-0.726001	0.475	0.756	6.11e-94	-0.281	ns
VAMP4	3.27e-98	-0.892249	0.055	0.265	6.35e-94	-0.21	ns
NDUFB5	3.33e-98	-0.819628	0.345	0.67	6.45e-94	-0.325	ns
HDDC2	4.09e-98	-0.681407	0.104	0.358	7.94e-94	-0.254	ns
ENSBTAG00000052720	4.43e-98	-0.913429	0.108	0.362	8.6e-94	-0.254	ns
REX1BD	4.84e-98	-0.821	0.23	0.544	9.38e-94	-0.314	ns
ZDHHC20	5.46e-98	-0.704713	0.061	0.279	1.06e-93	-0.218	ns
RNPS1	5.55e-98	-0.815335	0.393	0.693	1.08e-93	-0.3	ns
SRSF10	5.67e-98	-0.674349	0.229	0.552	1.1e-93	-0.323	ns
ENSBTAG00000045746	5.93e-98	-1.14189	0.028	0.207	1.15e-93	-0.179	down
EIF4A3	7.01e-98	-0.709438	0.136	0.412	1.36e-93	-0.276	ns
ARRDC1	9.73e-98	-1.0255	0.106	0.354	1.89e-93	-0.248	down
GPANK1	1.05e-97	-1.08379	0.057	0.267	2.04e-93	-0.21	down
TMX1	1.22e-97	-0.868129	0.064	0.281	2.37e-93	-0.217	ns
CDC26	1.33e-97	-1.13741	0.051	0.255	2.58e-93	-0.204	down
MRPS7	1.5e-97	-0.724931	0.152	0.438	2.92e-93	-0.286	ns
NDUFA13	1.53e-97	-0.748577	0.256	0.587	2.96e-93	-0.331	ns
DNAJC9	1.58e-97	-0.990926	0.045	0.244	3.06e-93	-0.199	ns
SPC25	1.65e-97	-0.825776	0.11	0.366	3.2e-93	-0.256	ns
NSUN5	1.87e-97	-1.31157	0.035	0.221	3.63e-93	-0.186	down
OARD1	2.05e-97	-0.732164	0.186	0.486	3.98e-93	-0.3	ns
PTK2B	2.06e-97	3.86844	0.235	0.054	4e-93	0.181	up
CDK4	2.12e-97	-0.818954	0.165	0.451	4.12e-93	-0.286	ns
AVEN	2.15e-97	-0.560167	0.125	0.396	4.17e-93	-0.271	ns
ZNHIT3	2.33e-97	-1.41545	0.032	0.215	4.52e-93	-0.183	down
ARPP19	2.74e-97	-0.721067	0.232	0.556	5.32e-93	-0.324	ns
SSU72	2.8e-97	-0.79723	0.216	0.526	5.43e-93	-0.31	ns
MAML3	3.95e-97	4.52686	0.218	0.043	7.66e-93	0.175	up
DNAJC10	4.11e-97	-0.570807	0.168	0.465	7.97e-93	-0.297	ns
CIBAR1	4.64e-97	-0.93041	0.056	0.265	9e-93	-0.209	ns
FDX2	5.16e-97	-0.74679	0.099	0.348	1e-92	-0.249	ns
POLR1D	6.4e-97	-0.837642	0.233	0.545	1.24e-92	-0.312	ns
CETN3	7.39e-97	-0.744051	0.129	0.397	1.43e-92	-0.268	ns
CHEK1	8.93e-97	-0.641169	0.08	0.314	1.73e-92	-0.234	ns
PRMT5	1.02e-96	-0.647334	0.09	0.332	1.99e-92	-0.242	ns
MED31	1.03e-96	-0.800017	0.093	0.334	2e-92	-0.241	ns
DDT	1.08e-96	-0.743821	0.478	0.768	2.09e-92	-0.29	ns
TXNL4A	1.16e-96	-0.813898	0.222	0.532	2.25e-92	-0.31	ns
CCNL2	1.25e-96	-0.607384	0.079	0.311	2.43e-92	-0.232	ns
NACC2	1.35e-96	-0.8996	0.035	0.221	2.62e-92	-0.186	ns
MRPS16	1.38e-96	-0.832905	0.319	0.642	2.67e-92	-0.323	ns
GLO1	1.44e-96	-0.933505	0.074	0.298	2.8e-92	-0.224	ns
ERC1	1.47e-96	-0.519113	0.133	0.41	2.84e-92	-0.277	ns
BRI3BP	2.42e-96	-0.613311	0.068	0.289	4.69e-92	-0.221	ns
DSP	2.48e-96	-0.702975	0.172	0.464	4.8e-92	-0.292	ns
LIAS	2.58e-96	-1.24086	0.036	0.222	5e-92	-0.186	down
PRKRIP1	2.81e-96	-0.761735	0.085	0.32	5.45e-92	-0.235	ns
PTGR2	2.98e-96	-0.570641	0.106	0.361	5.78e-92	-0.255	ns
CYTB	3.06e-96	0.576061	0.998	0.995	5.93e-92	0.003	ns
CCDC25	3.38e-96	-0.549229	0.14	0.421	6.55e-92	-0.281	ns
CYSTM1	4.57e-96	-0.782561	0.082	0.313	8.87e-92	-0.231	ns
TMEM144	4.67e-96	-0.772094	0.057	0.267	9.06e-92	-0.21	ns
MRPL22	5.34e-96	-0.658872	0.206	0.516	1.04e-91	-0.31	ns
DCPS	5.58e-96	-0.846592	0.069	0.289	1.08e-91	-0.22	ns
TGIF1	5.92e-96	-0.680262	0.069	0.289	1.15e-91	-0.22	ns
LBR	6.66e-96	-1.03274	0.028	0.205	1.29e-91	-0.177	down
BOP1	6.96e-96	-0.76595	0.073	0.298	1.35e-91	-0.225	ns
DPY30	7.63e-96	-0.839034	0.289	0.605	1.48e-91	-0.316	ns
COMTD1	7.77e-96	-0.90327	0.102	0.348	1.51e-91	-0.246	ns
DCTN6	7.79e-96	-1.10377	0.054	0.257	1.51e-91	-0.203	down
ZDHHC21	8.09e-96	-0.585178	0.078	0.309	1.57e-91	-0.231	ns
SUPT16H	1.16e-95	-0.566609	0.158	0.448	2.24e-91	-0.29	ns
ENSBTAG00000054561	1.2e-95	4.88932	0.147	0.005	2.32e-91	0.142	ns
GCH1	1.22e-95	-0.594379	0.186	0.489	2.37e-91	-0.303	ns
KLF5	1.81e-95	-0.661607	0.063	0.276	3.5e-91	-0.213	ns
NABP2	1.98e-95	-0.824678	0.066	0.283	3.85e-91	-0.217	ns
DHX15	2.04e-95	-0.461732	0.111	0.369	3.95e-91	-0.258	ns
TMED7	2.18e-95	-0.633502	0.09	0.329	4.24e-91	-0.239	ns
DDX56	2.19e-95	-0.804603	0.075	0.301	4.25e-91	-0.226	ns
NAAA	2.28e-95	-2.301	0.007	0.152	4.43e-91	-0.145	ns
RRAS2	2.39e-95	-0.506775	0.058	0.27	4.64e-91	-0.212	ns
PHAX	2.41e-95	-0.562659	0.135	0.408	4.68e-91	-0.273	ns
SLC7A4	2.98e-95	0.930274	0.865	0.781	5.78e-91	0.084	ns
TTC4	4.04e-95	-0.914586	0.048	0.246	7.85e-91	-0.198	ns
PCBP1	4.7e-95	-0.901293	0.123	0.381	9.11e-91	-0.258	ns
GCC2	4.93e-95	-0.427441	0.097	0.343	9.57e-91	-0.246	ns
TAF9	5.14e-95	-0.728239	0.199	0.504	9.96e-91	-0.305	ns
MAD2L2	5.68e-95	-0.678888	0.093	0.334	1.1e-90	-0.241	ns
NCOA4	5.91e-95	-0.540643	0.093	0.336	1.15e-90	-0.243	ns
ABCE1	6.2e-95	-0.530425	0.116	0.376	1.2e-90	-0.26	ns
INO80E	6.7e-95	-0.674269	0.069	0.289	1.3e-90	-0.22	ns
LEO1	6.73e-95	-0.61094	0.077	0.304	1.31e-90	-0.227	ns
CA10	6.73e-95	-1.64249	0.029	0.205	1.31e-90	-0.176	down
TRIM37	7.1e-95	-0.368793	0.11	0.368	1.38e-90	-0.258	ns
TMEM161B	7.12e-95	-0.520135	0.077	0.306	1.38e-90	-0.229	ns
KRR1	9.31e-95	-0.515099	0.082	0.314	1.81e-90	-0.232	ns
MRPS31	9.62e-95	-0.860417	0.074	0.296	1.87e-90	-0.222	ns
PSMA5	9.68e-95	-0.794283	0.31	0.636	1.88e-90	-0.326	ns
OSBPL10	1.04e-94	-0.698646	0.124	0.387	2.01e-90	-0.263	ns
MIER1	1.07e-94	-0.523148	0.13	0.401	2.07e-90	-0.271	ns
YEATS4	1.08e-94	-0.669357	0.124	0.388	2.09e-90	-0.264	ns
SYS1	1.1e-94	-0.70174	0.079	0.307	2.13e-90	-0.228	ns
ALG11	1.22e-94	-0.856122	0.053	0.256	2.36e-90	-0.203	ns
TIGAR	1.4e-94	-1.6735	0.02	0.185	2.71e-90	-0.165	down
POLR2J	1.55e-94	-0.798512	0.085	0.317	3.01e-90	-0.232	ns
FNTA	1.6e-94	-0.534562	0.134	0.407	3.1e-90	-0.273	ns
ATG3	1.92e-94	-0.510437	0.148	0.43	3.72e-90	-0.282	ns
CERS5	2.26e-94	-0.478696	0.127	0.396	4.38e-90	-0.269	ns
PSMD11	2.31e-94	-0.721874	0.191	0.489	4.48e-90	-0.298	ns
DMAC1	2.32e-94	-0.851347	0.102	0.345	4.51e-90	-0.243	ns
MARS1	2.36e-94	-0.86185	0.045	0.239	4.57e-90	-0.194	ns
TIMM50	2.45e-94	-0.79015	0.175	0.462	4.75e-90	-0.287	ns
WDR75	2.48e-94	-0.520487	0.082	0.314	4.81e-90	-0.232	ns
GLOD4	3.02e-94	-0.689802	0.176	0.471	5.86e-90	-0.295	ns
C7H1orf35	3.15e-94	-0.754837	0.184	0.479	6.11e-90	-0.295	ns
POLE3	3.24e-94	-0.714892	0.143	0.419	6.29e-90	-0.276	ns
ZNF131	3.4e-94	-0.624208	0.06	0.27	6.59e-90	-0.21	ns
MGAT4A	4.29e-94	-0.32674	0.094	0.337	8.32e-90	-0.243	ns
MRPS11	4.67e-94	-0.653674	0.178	0.473	9.05e-90	-0.295	ns
SEC61G	5.07e-94	-0.811198	0.599	0.845	9.84e-90	-0.246	ns
CFAP298	5.39e-94	-0.978329	0.046	0.241	1.04e-89	-0.195	ns
INPP4A	5.99e-94	-0.457024	0.13	0.399	1.16e-89	-0.269	ns
CNIH4	6.29e-94	-0.785835	0.146	0.417	1.22e-89	-0.271	ns
BCL2L1	6.64e-94	-0.913051	0.043	0.235	1.29e-89	-0.192	ns
SLC25A5	7.41e-94	-0.699881	0.554	0.804	1.44e-89	-0.25	ns
WDR46	7.81e-94	-0.624412	0.129	0.395	1.52e-89	-0.266	ns
H3C3	8.13e-94	-1.0263	0.05	0.247	1.58e-89	-0.197	down
USP1	8.37e-94	-0.412305	0.112	0.369	1.62e-89	-0.257	ns
FEN1	9.6e-94	-0.736913	0.078	0.304	1.86e-89	-0.226	ns
PRPF38A	9.91e-94	-0.62366	0.093	0.331	1.92e-89	-0.238	ns
RPL22L1	1.04e-93	-0.741129	0.482	0.761	2.02e-89	-0.279	ns
PRC1	1.25e-93	-0.654801	0.203	0.512	2.42e-89	-0.309	ns
PSMA4	1.47e-93	-0.756428	0.369	0.682	2.85e-89	-0.313	ns
PLEKHF2	1.6e-93	-0.551586	0.076	0.3	3.1e-89	-0.224	ns
SLC36A1	1.64e-93	-0.937236	0.024	0.194	3.18e-89	-0.17	ns
ACIN1	1.78e-93	-0.709753	0.27	0.586	3.45e-89	-0.316	ns
PPT1	2.06e-93	-0.651589	0.05	0.25	4e-89	-0.2	ns
TAF11	2.75e-93	-0.705273	0.106	0.354	5.33e-89	-0.248	ns
SORD	2.77e-93	-0.640273	0.207	0.513	5.36e-89	-0.306	ns
CDC37L1	2.85e-93	-0.767264	0.067	0.282	5.54e-89	-0.215	ns
BUD23	3.36e-93	-0.809118	0.286	0.602	6.51e-89	-0.316	ns
MTX1	3.67e-93	-0.808768	0.18	0.465	7.12e-89	-0.285	ns
PRDX1	5.01e-93	-0.351885	0.987	0.995	9.73e-89	-0.008	ns
NUF2	5.31e-93	-0.509273	0.107	0.356	1.03e-88	-0.249	ns
CNIH1	5.45e-93	-0.676777	0.139	0.407	1.06e-88	-0.268	ns
DMAC2	6.28e-93	-0.794037	0.057	0.262	1.22e-88	-0.205	ns
TXN2	6.54e-93	-0.834528	0.198	0.492	1.27e-88	-0.294	ns
SVOPL	6.84e-93	-1.9171	0.01	0.159	1.33e-88	-0.149	ns
ESD	7.09e-93	-0.681127	0.171	0.459	1.38e-88	-0.288	ns
ENSBTAG00000027610	7.66e-93	-1.47524	0.033	0.21	1.49e-88	-0.177	down
GINS2	8.42e-93	-0.74012	0.131	0.393	1.63e-88	-0.262	ns
ZRANB2	1.11e-92	-0.654038	0.213	0.523	2.15e-88	-0.31	ns
CCNA2	1.2e-92	-0.665028	0.083	0.312	2.32e-88	-0.229	ns
FNBP1	1.39e-92	2.87097	0.422	0.253	2.7e-88	0.169	up
ZPR1	1.49e-92	-0.613186	0.117	0.373	2.89e-88	-0.256	ns
PCNP	1.94e-92	-0.647071	0.198	0.502	3.77e-88	-0.304	ns
QTRT1	1.96e-92	-0.994199	0.05	0.245	3.81e-88	-0.195	ns
SNX18	2e-92	-1.51647	0.016	0.171	3.88e-88	-0.155	down
DLD	2.03e-92	-0.65742	0.19	0.488	3.93e-88	-0.298	ns
C5H12orf29	2.06e-92	-0.884939	0.06	0.265	3.99e-88	-0.205	ns
RBM25	2.13e-92	-0.641118	0.246	0.564	4.14e-88	-0.318	ns
SUGT1	2.17e-92	-0.59542	0.205	0.514	4.21e-88	-0.309	ns
COX1	2.23e-92	0.452421	0.998	0.995	4.33e-88	0.003	ns
SS18L2	2.25e-92	-0.755987	0.202	0.496	4.37e-88	-0.294	ns
IMP4	2.56e-92	-0.824666	0.181	0.468	4.97e-88	-0.287	ns
TMEM65	2.6e-92	-0.385749	0.093	0.331	5.05e-88	-0.238	ns
GFER	2.69e-92	-0.770634	0.136	0.4	5.22e-88	-0.264	ns
PCYT1A	2.79e-92	-0.367957	0.118	0.377	5.41e-88	-0.259	ns
AARSD1	2.83e-92	-0.6355	0.205	0.509	5.5e-88	-0.304	ns
CPPED1	3.19e-92	-0.971354	0.025	0.193	6.18e-88	-0.168	ns
DDX10	4.44e-92	-0.386913	0.149	0.431	8.62e-88	-0.282	ns
NUDT4	4.82e-92	-0.573178	0.061	0.27	9.36e-88	-0.209	ns
MRPL9	5.28e-92	-0.707397	0.203	0.506	1.02e-87	-0.303	ns
PWP1	5.56e-92	-0.679327	0.179	0.469	1.08e-87	-0.29	ns
PGAM5	5.7e-92	-0.847717	0.06	0.265	1.11e-87	-0.205	ns
ETS2	7.55e-92	-0.52219	0.107	0.354	1.46e-87	-0.247	ns
POLR3G	7.65e-92	-1.87584	0.011	0.16	1.48e-87	-0.149	ns
BCAR3	9.49e-92	2.87143	0.437	0.274	1.84e-87	0.163	up
MRPS35	1.01e-91	-0.793632	0.056	0.258	1.97e-87	-0.202	ns
SFT2D1	1.1e-91	-0.765164	0.142	0.408	2.13e-87	-0.266	ns
ZC3H15	1.11e-91	-0.71946	0.325	0.64	2.15e-87	-0.315	ns
LRP6	1.13e-91	-0.590551	0.075	0.297	2.18e-87	-0.222	ns
HARS1	1.13e-91	-0.64733	0.09	0.323	2.19e-87	-0.233	ns
ZNF511	1.26e-91	-0.674829	0.088	0.318	2.44e-87	-0.23	ns
RNF121	1.32e-91	-0.513284	0.146	0.422	2.56e-87	-0.276	ns
POLR3K	1.4e-91	-0.685799	0.136	0.402	2.71e-87	-0.266	ns
UBE2J2	1.59e-91	-0.819048	0.095	0.329	3.08e-87	-0.234	ns
ZFAND5	1.78e-91	-0.589255	0.135	0.401	3.45e-87	-0.266	ns
ERLEC1	1.93e-91	-0.570866	0.131	0.396	3.75e-87	-0.265	ns
PCMT1	2.21e-91	-0.61147	0.198	0.496	4.29e-87	-0.298	ns
PAIP2	2.25e-91	-0.659025	0.147	0.421	4.36e-87	-0.274	ns
ECE2.1	2.69e-91	-0.702372	0.084	0.311	5.22e-87	-0.227	ns
CD55	3.1e-91	4.33084	0.159	0.013	6.01e-87	0.146	ns
ERGIC2	3.15e-91	-0.464519	0.117	0.371	6.11e-87	-0.254	ns
RDM1	3.16e-91	-1.01416	0.046	0.236	6.13e-87	-0.19	down
PICALM	3.91e-91	-0.683915	0.205	0.507	7.58e-87	-0.302	ns
EMC3	4.75e-91	-0.566215	0.155	0.434	9.21e-87	-0.279	ns
TBCC	4.85e-91	-0.823827	0.064	0.272	9.41e-87	-0.208	ns
SH3TC1	5.63e-91	-0.643607	0.042	0.23	1.09e-86	-0.188	ns
SPRYD7	5.7e-91	-1.2673	0.03	0.202	1.11e-86	-0.172	down
NOL8	5.82e-91	-0.37332	0.113	0.366	1.13e-86	-0.253	ns
ADSL	5.96e-91	-0.704826	0.246	0.561	1.16e-86	-0.315	ns
C1D	6.41e-91	-1.22669	0.042	0.228	1.24e-86	-0.186	down
PPM1G	7.01e-91	-0.641557	0.16	0.438	1.36e-86	-0.278	ns
SLBP	7.26e-91	-0.600951	0.127	0.386	1.41e-86	-0.259	ns
CDC42EP5	8.48e-91	-2.05826	0.011	0.156	1.65e-86	-0.145	ns
BRD7	9.6e-91	-0.538709	0.175	0.468	1.86e-86	-0.293	ns
RNMT	1.27e-90	-0.560659	0.14	0.409	2.47e-86	-0.269	ns
C3H1orf146	1.57e-90	-1.78878	0.016	0.17	3.05e-86	-0.154	down
EEF1B2	1.74e-90	-0.509722	0.77	0.91	3.37e-86	-0.14	ns
SKIC8	1.87e-90	-0.672409	0.097	0.333	3.62e-86	-0.236	ns
RBM39	2.61e-90	-0.719494	0.319	0.644	5.07e-86	-0.325	ns
PSMD7	2.74e-90	-0.780943	0.383	0.667	5.31e-86	-0.284	ns
ITPA	2.95e-90	-0.761541	0.126	0.383	5.72e-86	-0.257	ns
CWC15	3.16e-90	-0.667368	0.196	0.494	6.13e-86	-0.298	ns
ABRAXAS1	3.45e-90	-0.828081	0.051	0.245	6.69e-86	-0.194	ns
KLHL12	3.51e-90	-0.944399	0.054	0.25	6.8e-86	-0.196	ns
P4HA2	3.89e-90	-0.688912	0.059	0.261	7.55e-86	-0.202	ns
MARVELD3	4.62e-90	-1.01575	0.034	0.21	8.96e-86	-0.176	down
CARS1	5.43e-90	-0.540898	0.07	0.282	1.05e-85	-0.212	ns
OSGEP	5.44e-90	-0.564105	0.074	0.291	1.05e-85	-0.217	ns
UBE2L3	5.47e-90	-0.785211	0.452	0.74	1.06e-85	-0.288	ns
SLC30A5	5.71e-90	-0.446204	0.078	0.299	1.11e-85	-0.221	ns
RAD23A	6.51e-90	-0.678285	0.082	0.305	1.26e-85	-0.223	ns
SATB2	6.68e-90	3.01005	0.37	0.188	1.3e-85	0.182	up
YARS1	6.68e-90	-0.53184	0.107	0.351	1.3e-85	-0.244	ns
DECR2	6.91e-90	-1.12448	0.058	0.257	1.34e-85	-0.199	down
SMPDL3A	7.76e-90	-1.79911	0.009	0.151	1.5e-85	-0.142	ns
OSER1	7.95e-90	-0.605559	0.096	0.331	1.54e-85	-0.235	ns
PTCD3	8.14e-90	-0.43164	0.078	0.299	1.58e-85	-0.221	ns
AQP3	8.69e-90	-1.58695	0.019	0.174	1.69e-85	-0.155	down
PSMD14	8.69e-90	-0.686385	0.289	0.61	1.69e-85	-0.321	ns
TMEM106C	9.43e-90	-0.692537	0.121	0.371	1.83e-85	-0.25	ns
TIMM21	9.78e-90	-0.66279	0.087	0.313	1.9e-85	-0.226	ns
SF3B6	9.99e-90	-0.804978	0.28	0.593	1.94e-85	-0.313	ns
TAGLN2	1.01e-89	-0.708008	0.53	0.791	1.96e-85	-0.261	ns
CENPV	1.17e-89	-1.03108	0.061	0.263	2.27e-85	-0.202	down
UFL1	1.18e-89	-0.290605	0.083	0.31	2.29e-85	-0.227	ns
LSM2	1.21e-89	-0.736308	0.168	0.446	2.34e-85	-0.278	ns
GAB1	1.24e-89	-0.374119	0.088	0.318	2.4e-85	-0.23	ns
ALDH1L2	1.37e-89	-2.48302	0.004	0.138	2.66e-85	-0.134	ns
KRT14	1.6e-89	-2.58159	0.004	0.137	3.1e-85	-0.133	ns
CCNY	1.64e-89	-0.55475	0.151	0.424	3.19e-85	-0.273	ns
COA4	1.9e-89	-0.775739	0.104	0.343	3.68e-85	-0.239	ns
UTP25	2.05e-89	-0.767666	0.054	0.251	3.97e-85	-0.197	ns
ZNF622	2.14e-89	-0.739398	0.09	0.317	4.15e-85	-0.227	ns
GNL2	2.19e-89	-0.669334	0.053	0.249	4.25e-85	-0.196	ns
C14H8orf89	2.28e-89	-0.992532	0.031	0.202	4.43e-85	-0.171	ns
SREK1IP1	2.29e-89	-0.626194	0.114	0.361	4.44e-85	-0.247	ns
ZNF330	3.08e-89	-0.865649	0.041	0.223	5.98e-85	-0.182	ns
VDAC1	3.14e-89	-0.772702	0.364	0.684	6.1e-85	-0.32	ns
IK	3.19e-89	-0.688848	0.276	0.593	6.18e-85	-0.317	ns
LSG1	3.2e-89	-0.523735	0.044	0.231	6.21e-85	-0.187	ns
RBMX	3.68e-89	-0.582202	0.094	0.327	7.14e-85	-0.233	ns
PSMA3	3.69e-89	-0.652047	0.221	0.526	7.15e-85	-0.305	ns
NSRP1	3.8e-89	-0.487622	0.176	0.47	7.37e-85	-0.294	ns
PUSL1	4.6e-89	-1.21176	0.035	0.209	8.92e-85	-0.174	down
RPL13A	4.6e-89	-0.336758	0.98	0.995	8.93e-85	-0.015	ns
PSMC6	5.09e-89	-0.647368	0.186	0.475	9.88e-85	-0.289	ns
BYSL	7.39e-89	-0.671828	0.064	0.27	1.43e-84	-0.206	ns
PPIL1	7.6e-89	-0.694746	0.09	0.316	1.47e-84	-0.226	ns
ACYP1	8.27e-89	-1.11604	0.063	0.264	1.6e-84	-0.201	down
TM2D3	8.95e-89	-0.754918	0.064	0.268	1.74e-84	-0.204	ns
TP53I3	1e-88	3.68417	0.176	0.024	1.94e-84	0.152	up
CCDC174	1.09e-88	-0.633303	0.096	0.328	2.11e-84	-0.232	ns
SLC25A26	1.17e-88	-0.445807	0.084	0.308	2.26e-84	-0.224	ns
FYB1	1.26e-88	-0.831499	0.038	0.216	2.44e-84	-0.178	ns
PPIL3	1.51e-88	-0.953477	0.068	0.275	2.93e-84	-0.207	ns
ATRAID	1.58e-88	-0.690529	0.069	0.278	3.06e-84	-0.209	ns
PEX11A	1.75e-88	-0.985062	0.068	0.272	3.4e-84	-0.204	ns
GTF2F1	1.99e-88	-0.453453	0.106	0.348	3.85e-84	-0.242	ns
EXOSC9	2.07e-88	-0.644855	0.067	0.274	4.02e-84	-0.207	ns
WASHC3	2.17e-88	-0.677101	0.074	0.287	4.21e-84	-0.213	ns
RUFY3	2.28e-88	-0.516024	0.067	0.275	4.41e-84	-0.208	ns
SIPA1	2.69e-88	-0.641914	0.065	0.271	5.22e-84	-0.206	ns
TIMM8B	3.08e-88	-0.779072	0.388	0.695	5.97e-84	-0.307	ns
TLCD1	3.44e-88	-1.10296	0.036	0.211	6.68e-84	-0.175	down
PTPN3	3.47e-88	-0.551471	0.053	0.248	6.73e-84	-0.195	ns
PPIE	4.35e-88	-0.974401	0.046	0.232	8.43e-84	-0.186	ns
CYB5A	4.55e-88	-0.64764	0.12	0.37	8.82e-84	-0.25	ns
SNRPE	4.6e-88	-0.823027	0.098	0.33	8.93e-84	-0.232	ns
BCLAF1	4.63e-88	-0.462677	0.178	0.471	8.98e-84	-0.293	ns
PXYLP1	4.83e-88	-1.00281	0.032	0.202	9.37e-84	-0.17	down
CD63	4.86e-88	0.747962	0.777	0.743	9.44e-84	0.034	ns
REXO4	5.48e-88	-0.890227	0.046	0.233	1.06e-83	-0.187	ns
TEFM	5.52e-88	-1.43875	0.021	0.177	1.07e-83	-0.156	down
SCD	6.85e-88	1.46504	0.602	0.509	1.33e-83	0.093	ns
DLAT	7.97e-88	-0.585187	0.112	0.356	1.55e-83	-0.244	ns
FLNA	1.04e-87	2.4271	0.44	0.285	2.01e-83	0.155	up
DBN1	1.22e-87	-0.638251	0.1	0.333	2.37e-83	-0.233	ns
ULBP21	1.39e-87	-2.83077	0.003	0.131	2.69e-83	-0.128	ns
CHCHD7	1.44e-87	-0.812694	0.32	0.631	2.79e-83	-0.311	ns
TEX2	1.53e-87	-0.292114	0.141	0.411	2.96e-83	-0.27	ns
RPUSD4	1.86e-87	-0.757466	0.057	0.252	3.61e-83	-0.195	ns
MRPL13	2.42e-87	-0.684783	0.219	0.519	4.69e-83	-0.3	ns
ACTL6A	2.46e-87	-0.6515	0.072	0.282	4.78e-83	-0.21	ns
CCDC90B	2.53e-87	-0.763344	0.052	0.243	4.91e-83	-0.191	ns
ILRUN	2.7e-87	-0.36622	0.115	0.363	5.24e-83	-0.248	ns
PYY2	2.73e-87	-3.54593	0.001	0.127	5.29e-83	-0.126	ns
MTCH2	3.01e-87	-0.674761	0.234	0.536	5.84e-83	-0.302	ns
PLPBP	3.51e-87	-0.908163	0.043	0.224	6.81e-83	-0.181	ns
DEGS2	3.91e-87	-2.33627	0.009	0.146	7.58e-83	-0.137	ns
COPS2	4.3e-87	-0.551688	0.175	0.458	8.34e-83	-0.283	ns
CYB561D2	4.37e-87	-0.586512	0.108	0.348	8.47e-83	-0.24	ns
TMEM183A	5.11e-87	-0.518116	0.122	0.373	9.92e-83	-0.251	ns
ATG5	5.8e-87	-0.462622	0.115	0.361	1.13e-82	-0.246	ns
NBN	6.17e-87	-0.507	0.062	0.263	1.2e-82	-0.201	ns
ESRRB	7.99e-87	-2.49226	0.003	0.13	1.55e-82	-0.127	ns
GADD45GIP1	9.12e-87	-0.715977	0.235	0.534	1.77e-82	-0.299	ns
SAP18	9.79e-87	-0.776328	0.409	0.708	1.9e-82	-0.299	ns
LY6E	1.01e-86	3.00618	0.273	0.093	1.97e-82	0.18	up
BMS1	1.06e-86	-0.47416	0.17	0.451	2.05e-82	-0.281	ns
CWC25	1.11e-86	-0.683657	0.058	0.255	2.15e-82	-0.197	ns
CCDC93	1.11e-86	-0.324574	0.11	0.354	2.15e-82	-0.244	ns
RPL7A	1.14e-86	-0.277788	0.992	0.999	2.21e-82	-0.007	ns
EEA1	1.25e-86	-0.469027	0.144	0.412	2.43e-82	-0.268	ns
MFAP2	1.28e-86	-1.30525	0.031	0.198	2.49e-82	-0.167	down
ILF2	1.31e-86	-0.730438	0.285	0.591	2.54e-82	-0.306	ns
THUMPD1	1.68e-86	-0.838541	0.04	0.217	3.26e-82	-0.177	ns
TSTD3	1.72e-86	-0.704411	0.082	0.298	3.35e-82	-0.216	ns
COMMD6	1.76e-86	-0.771278	0.124	0.368	3.42e-82	-0.244	ns
SKA3	1.88e-86	-0.662785	0.055	0.248	3.66e-82	-0.193	ns
NUDT21	2.02e-86	-0.644017	0.111	0.351	3.91e-82	-0.24	ns
PSMA2	2.09e-86	-0.740597	0.384	0.69	4.05e-82	-0.306	ns
PNN	2.33e-86	-0.591396	0.225	0.529	4.52e-82	-0.304	ns
REXO2	2.48e-86	1.30961	0.613	0.569	4.81e-82	0.044	ns
COA8	2.83e-86	-0.624104	0.157	0.427	5.5e-82	-0.27	ns
PPA1	2.93e-86	-0.601096	0.104	0.337	5.69e-82	-0.233	ns
AP1S3	3.1e-86	-0.856058	0.046	0.23	6.01e-82	-0.184	ns
CRYZ	3.63e-86	-0.594303	0.098	0.328	7.05e-82	-0.23	ns
EML4	3.81e-86	2.68128	0.441	0.293	7.39e-82	0.148	ns
CCDC86	4.6e-86	-1.04852	0.039	0.214	8.92e-82	-0.175	down
API5	4.85e-86	-0.404533	0.067	0.272	9.41e-82	-0.205	ns
EPAS1	5.9e-86	2.09791	0.517	0.401	1.15e-81	0.116	ns
SMIM26	6.01e-86	-0.695649	0.134	0.387	1.17e-81	-0.253	ns
EMC2	6.69e-86	-0.523428	0.139	0.402	1.3e-81	-0.263	ns
HSPBP1	7.84e-86	-0.693975	0.101	0.332	1.52e-81	-0.231	ns
SH3BGRL2	1.08e-85	-0.539567	0.21	0.509	2.09e-81	-0.299	ns
CCND1	1.24e-85	-2.56465	0.003	0.128	2.41e-81	-0.125	ns
RFC1	1.33e-85	-0.382819	0.095	0.324	2.59e-81	-0.229	ns
RPA3	1.35e-85	-0.686122	0.242	0.549	2.63e-81	-0.307	ns
RBM27	1.36e-85	-0.345104	0.125	0.378	2.65e-81	-0.253	ns
UQCRC2	1.38e-85	-0.600368	0.242	0.55	2.68e-81	-0.308	ns
EIF4E2	1.6e-85	-0.641462	0.194	0.479	3.11e-81	-0.285	ns
UQCR10	1.66e-85	-0.522055	0.726	0.901	3.23e-81	-0.175	ns
PDCD5	1.77e-85	-0.701884	0.286	0.605	3.44e-81	-0.319	ns
DHODH	1.83e-85	-0.89946	0.048	0.231	3.55e-81	-0.183	ns
DPEP1	2.2e-85	-2.19639	0.011	0.15	4.27e-81	-0.139	ns
DNAJC11	2.47e-85	-0.370188	0.082	0.301	4.8e-81	-0.219	ns
IFI30	2.64e-85	-0.692969	0.226	0.521	5.11e-81	-0.295	ns
CCDC51	2.9e-85	-0.519276	0.087	0.308	5.63e-81	-0.221	ns
SDHAF1	3.05e-85	-0.902975	0.056	0.247	5.92e-81	-0.191	ns
RAB5IF	3.38e-85	-0.734326	0.389	0.685	6.55e-81	-0.296	ns
ATP6V1E1	4.11e-85	-0.748638	0.398	0.688	7.96e-81	-0.29	ns
COMMD3	4.25e-85	-0.65811	0.165	0.435	8.25e-81	-0.27	ns
SRI	4.67e-85	-0.590741	0.15	0.415	9.06e-81	-0.265	ns
TSPAN15	5.24e-85	-1.16212	0.029	0.191	1.02e-80	-0.162	down
IQGAP2	5.58e-85	-0.430135	0.145	0.408	1.08e-80	-0.263	ns
CLDN7	5.97e-85	-1.65032	0.024	0.179	1.16e-80	-0.155	down
GPR15LG	6.38e-85	-2.16033	0.009	0.145	1.24e-80	-0.136	ns
UTP20	6.74e-85	-0.306738	0.081	0.298	1.31e-80	-0.217	ns
TRIP13	7.25e-85	-0.783097	0.055	0.245	1.41e-80	-0.19	ns
STK16	7.44e-85	-0.576102	0.123	0.371	1.44e-80	-0.248	ns
TXNDC9	8.11e-85	-0.592955	0.116	0.357	1.57e-80	-0.241	ns
CGA	9.4e-85	-1.12811	0.031	0.195	1.82e-80	-0.164	down
TARBP2	9.77e-85	-0.618297	0.097	0.325	1.89e-80	-0.228	ns
DHRS7B	1.05e-84	-0.537403	0.058	0.252	2.03e-80	-0.194	ns
DYNC1LI1	1.05e-84	-0.502404	0.166	0.442	2.03e-80	-0.276	ns
ARL1	1.1e-84	-0.608184	0.179	0.459	2.14e-80	-0.28	ns
SNX3	1.15e-84	-0.644471	0.304	0.616	2.23e-80	-0.312	ns
GARS1	1.19e-84	-0.490915	0.173	0.454	2.31e-80	-0.281	ns
TXNDC15	1.36e-84	-0.833242	0.047	0.227	2.65e-80	-0.18	ns
GOLGA7	1.48e-84	-0.425461	0.126	0.376	2.86e-80	-0.25	ns
FLT1	1.49e-84	-0.206394	0.05	0.237	2.9e-80	-0.187	ns
EXOSC6	1.76e-84	-0.624865	0.144	0.404	3.42e-80	-0.26	ns
MLXIPL	1.87e-84	-2.35557	0.004	0.131	3.63e-80	-0.127	ns
HMBS	1.88e-84	-0.85833	0.063	0.259	3.64e-80	-0.196	ns
UQCRFS1	1.93e-84	-0.748513	0.415	0.707	3.75e-80	-0.292	ns
KIN	1.97e-84	-0.610451	0.056	0.247	3.83e-80	-0.191	ns
MZT1	2.29e-84	-0.888848	0.064	0.26	4.44e-80	-0.196	ns
PARPBP	2.52e-84	-0.825485	0.044	0.223	4.89e-80	-0.179	ns
ARFIP2	2.64e-84	-0.631585	0.089	0.308	5.12e-80	-0.219	ns
SPATA5	2.9e-84	-0.615975	0.083	0.298	5.62e-80	-0.215	ns
TRMU	3.01e-84	-0.677339	0.079	0.29	5.84e-80	-0.211	ns
DAZAP1	3.25e-84	-0.492063	0.202	0.495	6.3e-80	-0.293	ns
PRPF19	3.49e-84	-0.505165	0.113	0.354	6.77e-80	-0.241	ns
NOL11	3.61e-84	-0.503492	0.09	0.312	6.99e-80	-0.222	ns
DERL1	3.63e-84	-0.430016	0.131	0.383	7.04e-80	-0.252	ns
YIPF5	3.94e-84	-0.512622	0.109	0.343	7.64e-80	-0.234	ns
COMMD9	3.98e-84	-0.609288	0.109	0.343	7.73e-80	-0.234	ns
KDM1A	4.15e-84	-0.527567	0.19	0.475	8.06e-80	-0.285	ns
CELF2	4.25e-84	-0.260386	0.085	0.304	8.24e-80	-0.219	ns
PNISR	4.53e-84	-0.340647	0.128	0.381	8.78e-80	-0.253	ns
TCOF1	4.98e-84	-0.345579	0.115	0.357	9.66e-80	-0.242	ns
CGRRF1	5.03e-84	-1.24469	0.027	0.185	9.77e-80	-0.158	down
CRPPA	5.47e-84	-0.523171	0.103	0.333	1.06e-79	-0.23	ns
TERF2IP	5.71e-84	-0.565917	0.109	0.345	1.11e-79	-0.236	ns
AKIRIN1	5.77e-84	-0.568879	0.083	0.298	1.12e-79	-0.215	ns
ENSBTAG00000038330	6.51e-84	-0.679868	0.481	0.75	1.26e-79	-0.269	ns
DNPEP	6.64e-84	-0.503747	0.136	0.391	1.29e-79	-0.255	ns
GPS2	6.76e-84	-0.619094	0.142	0.397	1.31e-79	-0.255	ns
KRT15	7.4e-84	4.80423	0.132	0.006	1.44e-79	0.126	ns
HIKESHI	1.12e-83	-0.592606	0.194	0.483	2.17e-79	-0.289	ns
DSG3	1.17e-83	-1.35422	0.018	0.164	2.27e-79	-0.146	ns
FNBP4	1.19e-83	-0.24794	0.103	0.337	2.32e-79	-0.234	ns
MTRF1	1.32e-83	-0.529667	0.074	0.28	2.55e-79	-0.206	ns
SIKE1	1.42e-83	-1.02531	0.047	0.227	2.75e-79	-0.18	down
ENSBTAG00000045504	1.44e-83	-0.836441	0.046	0.225	2.79e-79	-0.179	ns
TAF1B	1.53e-83	-0.905225	0.032	0.195	2.98e-79	-0.163	ns
MPZL2	1.72e-83	-0.954743	0.033	0.197	3.34e-79	-0.164	ns
RABGEF1	2.12e-83	-0.583517	0.069	0.271	4.12e-79	-0.202	ns
TMEM87A	2.16e-83	-0.543778	0.051	0.236	4.19e-79	-0.185	ns
GNL3L	2.27e-83	-0.449492	0.108	0.344	4.41e-79	-0.236	ns
USP16	2.55e-83	-0.460504	0.185	0.471	4.94e-79	-0.286	ns
PRMT1	2.58e-83	-0.762831	0.333	0.63	5.01e-79	-0.297	ns
SELENOF	2.64e-83	-0.593799	0.225	0.521	5.12e-79	-0.296	ns
TEAD4	2.79e-83	-0.899716	0.029	0.189	5.4e-79	-0.16	ns
BOD1	2.91e-83	-0.671552	0.061	0.255	5.64e-79	-0.194	ns
MCM4	2.92e-83	-0.4435	0.122	0.367	5.66e-79	-0.245	ns
HPDL	2.92e-83	-1.43184	0.022	0.174	5.66e-79	-0.152	down
FHOD3	3.11e-83	-1.34132	0.024	0.177	6.03e-79	-0.153	down
SRP9	3.35e-83	-1.11014	0.032	0.196	6.5e-79	-0.164	down
SGPL1	3.61e-83	-0.613107	0.055	0.243	7e-79	-0.188	ns
MPHOSPH8	4.39e-83	-0.432419	0.185	0.469	8.51e-79	-0.284	ns
RFC4	4.72e-83	-0.805485	0.069	0.268	9.15e-79	-0.199	ns
ZFP91	5.26e-83	-0.53521	0.198	0.486	1.02e-78	-0.288	ns
NUFIP2	5.7e-83	-0.514127	0.067	0.266	1.11e-78	-0.199	ns
MYCBP	5.74e-83	-0.594204	0.188	0.47	1.11e-78	-0.282	ns
CAAP1	7.34e-83	-0.731423	0.05	0.233	1.42e-78	-0.183	ns
NUS1	7.46e-83	-0.480476	0.149	0.408	1.45e-78	-0.259	ns
BLOC1S2	7.6e-83	-0.736124	0.279	0.576	1.48e-78	-0.297	ns
CLPP	7.67e-83	-0.580291	0.177	0.452	1.49e-78	-0.275	ns
BSCL2	7.95e-83	-0.628613	0.084	0.298	1.54e-78	-0.214	ns
IGF2BP1	8.1e-83	-0.54366	0.218	0.516	1.57e-78	-0.298	ns
USP8	8.1e-83	-0.378589	0.178	0.464	1.57e-78	-0.286	ns
NCBP2	8.4e-83	-0.677164	0.211	0.496	1.63e-78	-0.285	ns
EIF3E	9.09e-83	-0.674371	0.328	0.635	1.76e-78	-0.307	ns
MSRB3	1.02e-82	3.58465	0.194	0.04	1.98e-78	0.154	up
POLR3D	1.09e-82	-0.498373	0.107	0.34	2.11e-78	-0.233	ns
ARL6IP1	1.17e-82	-0.748642	0.285	0.574	2.26e-78	-0.289	ns
RPS4Y1	1.21e-82	-0.726349	0.407	0.7	2.34e-78	-0.293	ns
NUTF2	1.33e-82	-0.694452	0.244	0.54	2.58e-78	-0.296	ns
FKBP1A	1.61e-82	-0.635523	0.225	0.52	3.13e-78	-0.295	ns
SLC26A4	1.71e-82	-1.15394	0.013	0.152	3.32e-78	-0.139	ns
FDX1	1.88e-82	-0.592926	0.168	0.437	3.64e-78	-0.269	ns
DBI	1.99e-82	0.582097	0.821	0.833	3.86e-78	-0.012	ns
NAPG	2.04e-82	-0.790006	0.054	0.238	3.96e-78	-0.184	ns
RHNO1	2.14e-82	-0.598247	0.065	0.261	4.14e-78	-0.196	ns
CDC123	2.38e-82	-0.523436	0.131	0.381	4.61e-78	-0.25	ns
DCP2	2.67e-82	-0.283143	0.105	0.337	5.19e-78	-0.232	ns
ATP6V0D2	2.92e-82	-0.678338	0.089	0.303	5.67e-78	-0.214	ns
MRPS23	3.08e-82	-0.653857	0.163	0.429	5.98e-78	-0.266	ns
ZC3H8	3.26e-82	-0.771222	0.042	0.216	6.33e-78	-0.174	ns
RASSF7	3.75e-82	-0.718089	0.099	0.321	7.27e-78	-0.222	ns
THYN1	4.33e-82	-0.740706	0.081	0.29	8.39e-78	-0.209	ns
SH3BGRL3	4.71e-82	1.08987	0.655	0.632	9.13e-78	0.023	ns
MORF4L1	4.98e-82	-0.662078	0.264	0.572	9.67e-78	-0.308	ns
TBL3	5.15e-82	-0.493407	0.106	0.337	1e-77	-0.231	ns
SMAD1	5.95e-82	2.92398	0.349	0.177	1.15e-77	0.172	up
UBAP2L	6.38e-82	-0.359783	0.121	0.365	1.24e-77	-0.244	ns
MCRS1	6.91e-82	-0.708637	0.095	0.316	1.34e-77	-0.221	ns
NDUFA6	7.33e-82	-0.750763	0.459	0.741	1.42e-77	-0.282	ns
UBXN8	7.75e-82	-0.923411	0.035	0.199	1.5e-77	-0.164	ns
FARSA	7.76e-82	-0.432943	0.12	0.362	1.5e-77	-0.242	ns
RRP8	9.38e-82	-1.23279	0.023	0.174	1.82e-77	-0.151	down
MYO1D	9.56e-82	1.33135	0.643	0.525	1.85e-77	0.118	ns
CMSS1	1.19e-81	-0.426224	0.145	0.4	2.3e-77	-0.255	ns
ATP6V1D	1.22e-81	-0.499053	0.169	0.441	2.36e-77	-0.272	ns
XBP1	1.54e-81	-0.918199	0.067	0.262	2.99e-77	-0.195	ns
PPP1R2	1.55e-81	-0.533925	0.062	0.254	3e-77	-0.192	ns
NARS1	1.67e-81	-0.611497	0.26	0.565	3.24e-77	-0.305	ns
TUBA1B	1.72e-81	-0.43042	0.876	0.957	3.34e-77	-0.081	ns
LARGE1	1.82e-81	-0.651961	0.035	0.199	3.53e-77	-0.164	ns
WARS1	1.95e-81	-0.525698	0.15	0.409	3.78e-77	-0.259	ns
POLDIP2	2.1e-81	-0.617265	0.132	0.377	4.07e-77	-0.245	ns
PSMA6	2.23e-81	-0.693948	0.367	0.673	4.33e-77	-0.306	ns
KPNA3	3.2e-81	-0.384515	0.132	0.381	6.21e-77	-0.249	ns
GALK2	3.51e-81	-0.497407	0.061	0.253	6.8e-77	-0.192	ns
MSANTD4	3.55e-81	-0.785373	0.039	0.207	6.88e-77	-0.168	ns
PFKFB3	3.79e-81	-0.911628	0.033	0.194	7.36e-77	-0.161	ns
SECISBP2	3.83e-81	-0.41504	0.072	0.274	7.43e-77	-0.202	ns
RRBP1	4.3e-81	-0.826422	0.267	0.535	8.34e-77	-0.268	ns
BABAM1	4.35e-81	-0.615733	0.1	0.323	8.43e-77	-0.223	ns
GON7	4.4e-81	-0.751489	0.084	0.293	8.54e-77	-0.209	ns
POGLUT2	4.67e-81	-0.690724	0.036	0.201	9.06e-77	-0.165	ns
NFYB	4.88e-81	-0.794363	0.055	0.239	9.47e-77	-0.184	ns
RNF10	4.91e-81	-0.57889	0.236	0.53	9.53e-77	-0.294	ns
MAIP1	5.07e-81	-1.11935	0.044	0.216	9.84e-77	-0.172	down
METTL16	5.26e-81	-0.470663	0.052	0.234	1.02e-76	-0.182	ns
RBM22	5.3e-81	-0.385712	0.076	0.282	1.03e-76	-0.206	ns
NUDT1	5.42e-81	-0.560455	0.122	0.361	1.05e-76	-0.239	ns
CREBZF	5.44e-81	-0.341307	0.066	0.262	1.05e-76	-0.196	ns
NAMPT	6.36e-81	-0.552692	0.055	0.239	1.23e-76	-0.184	ns
MED4	6.71e-81	-0.52916	0.111	0.344	1.3e-76	-0.233	ns
TMA16	6.75e-81	-0.517322	0.096	0.316	1.31e-76	-0.22	ns
AKIP1	6.97e-81	-0.744978	0.048	0.226	1.35e-76	-0.178	ns
MAT2A	7.07e-81	-0.353877	0.149	0.411	1.37e-76	-0.262	ns
METAP1D	7.23e-81	-0.618625	0.055	0.239	1.4e-76	-0.184	ns
MCTS1	9.46e-81	-0.622997	0.07	0.268	1.84e-76	-0.198	ns
TXLNG	9.99e-81	-0.52807	0.056	0.241	1.94e-76	-0.185	ns
LSM7	1.01e-80	-0.699213	0.475	0.76	1.96e-76	-0.285	ns
VAPA	1.06e-80	-0.599853	0.229	0.523	2.07e-76	-0.294	ns
TARDBP	1.07e-80	-0.50331	0.088	0.301	2.08e-76	-0.213	ns
SLC35A4	1.08e-80	-0.641816	0.079	0.285	2.1e-76	-0.206	ns
ORC1	1.1e-80	-0.671494	0.046	0.222	2.12e-76	-0.176	ns
ATAD1	1.36e-80	-0.316562	0.087	0.301	2.64e-76	-0.214	ns
FOXN2	1.38e-80	-0.329083	0.076	0.28	2.68e-76	-0.204	ns
SPATA6	1.58e-80	-1.2227	0.018	0.16	3.06e-76	-0.142	ns
MRPL37	1.58e-80	-0.474876	0.134	0.381	3.07e-76	-0.247	ns
MRM1	1.65e-80	-0.599118	0.072	0.272	3.2e-76	-0.2	ns
FILIP1L	1.66e-80	-0.871042	0.057	0.242	3.23e-76	-0.185	ns
PPP3R1	1.67e-80	-0.418658	0.141	0.395	3.24e-76	-0.254	ns
TDP2	2.01e-80	-0.469474	0.055	0.24	3.89e-76	-0.185	ns
UBE2K	2.3e-80	-0.626175	0.329	0.645	4.46e-76	-0.316	ns
STAMBP	2.54e-80	-0.468549	0.102	0.327	4.92e-76	-0.225	ns
MED12L	2.68e-80	-1.01532	0.031	0.189	5.19e-76	-0.158	down
GRWD1	2.68e-80	-0.428863	0.087	0.3	5.19e-76	-0.213	ns
ZMAT2	2.75e-80	-0.556463	0.202	0.487	5.33e-76	-0.285	ns
MAD2L1	2.97e-80	-0.45165	0.072	0.271	5.76e-76	-0.199	ns
GGA2	3.09e-80	-0.398202	0.111	0.344	5.99e-76	-0.233	ns
ELOVL1	3.13e-80	-0.55137	0.12	0.356	6.06e-76	-0.236	ns
GIPC2	3.31e-80	-0.408197	0.117	0.352	6.42e-76	-0.235	ns
RAB37	3.39e-80	-1.75641	0.012	0.145	6.58e-76	-0.133	ns
UNC5B	3.6e-80	-0.380027	0.045	0.219	6.98e-76	-0.174	ns
JAGN1	3.79e-80	-0.644856	0.13	0.373	7.35e-76	-0.243	ns
PIGK	4.36e-80	-0.342292	0.068	0.265	8.45e-76	-0.197	ns
TADA2A	4.4e-80	-0.372844	0.091	0.307	8.53e-76	-0.216	ns
SKA1	4.61e-80	-0.494148	0.116	0.349	8.95e-76	-0.233	ns
PUS1	4.67e-80	-0.90067	0.043	0.214	9.06e-76	-0.171	ns
NRAS	5.46e-80	-0.386317	0.135	0.383	1.06e-75	-0.248	ns
TUBGCP3	5.9e-80	-0.554964	0.069	0.264	1.14e-75	-0.195	ns
MAP4K1	6.96e-80	-0.759522	0.04	0.208	1.35e-75	-0.168	ns
SUPV3L1	7.04e-80	-0.88654	0.036	0.199	1.37e-75	-0.163	ns
YAF2	7.35e-80	-0.279777	0.065	0.258	1.43e-75	-0.193	ns
GTF2B	7.79e-80	-0.446762	0.112	0.343	1.51e-75	-0.231	ns
LIN28B	7.94e-80	-0.428286	0.037	0.202	1.54e-75	-0.165	ns
M6PR	8.06e-80	-0.465232	0.134	0.381	1.56e-75	-0.247	ns
ABCF2	8.73e-80	-0.470968	0.111	0.342	1.69e-75	-0.231	ns
MYC	8.75e-80	-1.37129	0.028	0.181	1.7e-75	-0.153	down
ATP6V1G1	1.04e-79	-0.735042	0.397	0.674	2.01e-75	-0.277	ns
UTP14A	1.07e-79	-0.589805	0.192	0.467	2.07e-75	-0.275	ns
DHX37	1.11e-79	-0.543991	0.066	0.259	2.16e-75	-0.193	ns
PTMA.1	1.13e-79	-0.81333	0.05	0.227	2.19e-75	-0.177	ns
LARP1B	1.13e-79	-0.261022	0.098	0.321	2.19e-75	-0.223	ns
SYT9	1.17e-79	-0.624768	0.039	0.206	2.27e-75	-0.167	ns
WASL	1.2e-79	-0.379233	0.172	0.445	2.32e-75	-0.273	ns
RPTOR	1.39e-79	-0.45375	0.119	0.356	2.69e-75	-0.237	ns
UTP15	1.44e-79	-0.744942	0.042	0.21	2.8e-75	-0.168	ns
RPS19	1.47e-79	-0.289492	0.985	0.996	2.85e-75	-0.011	ns
PSMD6	1.48e-79	-0.480368	0.171	0.442	2.87e-75	-0.271	ns
TIPRL	1.49e-79	-0.420452	0.096	0.316	2.89e-75	-0.22	ns
EIF2A	1.49e-79	-0.319026	0.159	0.427	2.9e-75	-0.268	ns
ENSBTAG00000053661	1.76e-79	4.76484	0.124	0.005	3.41e-75	0.119	ns
METAP2	1.85e-79	-0.647939	0.449	0.734	3.59e-75	-0.285	ns
MTG1	2.12e-79	-0.597041	0.092	0.306	4.11e-75	-0.214	ns
ARPC5L	2.5e-79	-0.708012	0.397	0.686	4.84e-75	-0.289	ns
PCSK6	2.61e-79	-1.03927	0.027	0.179	5.06e-75	-0.152	down
AURKAIP1	2.66e-79	-0.698959	0.31	0.598	5.16e-75	-0.288	ns
CCDC43	2.7e-79	-0.502412	0.077	0.279	5.23e-75	-0.202	ns
ENSBTAG00000018680	2.77e-79	-0.508483	0.045	0.218	5.37e-75	-0.173	ns
UBE2N	2.77e-79	-0.611072	0.275	0.58	5.38e-75	-0.305	ns
ANKRD16	2.85e-79	-0.681526	0.057	0.241	5.53e-75	-0.184	ns
SERGEF	2.89e-79	-0.352442	0.121	0.358	5.61e-75	-0.237	ns
CXCL5	3.14e-79	-1.55217	0.018	0.159	6.09e-75	-0.141	ns
AARS1	3.47e-79	-0.17608	0.102	0.328	6.73e-75	-0.226	ns
TBC1D20	3.47e-79	-0.461893	0.097	0.317	6.73e-75	-0.22	ns
CENPW	3.59e-79	-0.637993	0.172	0.435	6.97e-75	-0.263	ns
EIF4H	3.67e-79	-0.541412	0.263	0.569	7.11e-75	-0.306	ns
MTIF3	3.67e-79	-0.813832	0.033	0.191	7.12e-75	-0.158	ns
ERCC8	4.29e-79	-0.696544	0.05	0.227	8.31e-75	-0.177	ns
CHRAC1	4.29e-79	-0.775997	0.068	0.261	8.33e-75	-0.193	ns
POLD1	4.57e-79	-0.562694	0.057	0.241	8.86e-75	-0.184	ns
PSMD4	4.7e-79	-0.710649	0.356	0.656	9.12e-75	-0.3	ns
MTFR2	5.03e-79	-0.450741	0.076	0.277	9.77e-75	-0.201	ns
HSCB	5.77e-79	-1.17856	0.043	0.211	1.12e-74	-0.168	down
MRPS9	6.3e-79	-0.482842	0.069	0.264	1.22e-74	-0.195	ns
ZWILCH	6.32e-79	-0.321938	0.093	0.311	1.23e-74	-0.218	ns
AFG3L2	7.14e-79	-0.472899	0.176	0.447	1.39e-74	-0.271	ns
SLC7A6OS	7.22e-79	-0.559823	0.056	0.238	1.4e-74	-0.182	ns
RRP12	7.92e-79	-0.403995	0.074	0.274	1.54e-74	-0.2	ns
TOMM40	8.4e-79	-0.618614	0.273	0.578	1.63e-74	-0.305	ns
NT5C3A	8.92e-79	-1.95369	0.013	0.145	1.73e-74	-0.132	ns
TMEM63A	9.38e-79	-0.689824	0.039	0.205	1.82e-74	-0.166	ns
LEPROTL1	1.04e-78	-0.794472	0.065	0.254	2.01e-74	-0.189	ns
TOMM70	1.05e-78	-0.4941	0.182	0.456	2.04e-74	-0.274	ns
NSMCE4A	1.21e-78	-0.575221	0.097	0.313	2.34e-74	-0.216	ns
SNUPN	1.45e-78	-0.636927	0.084	0.29	2.82e-74	-0.206	ns
MRRF	1.59e-78	-0.454451	0.113	0.342	3.08e-74	-0.229	ns
SRP68	1.68e-78	-0.501474	0.144	0.396	3.26e-74	-0.252	ns
DNPH1	1.86e-78	-0.728876	0.345	0.639	3.61e-74	-0.294	ns
FTSJ3	1.91e-78	-0.369438	0.058	0.242	3.7e-74	-0.184	ns
PUS7	1.93e-78	-0.593769	0.035	0.195	3.74e-74	-0.16	ns
NOC2L	2.05e-78	-0.450488	0.13	0.372	3.98e-74	-0.242	ns
STEEP1	2.06e-78	-0.72507	0.104	0.323	4e-74	-0.219	ns
STRIP2	2.14e-78	-1.42909	0.019	0.159	4.15e-74	-0.14	ns
RRP36	2.2e-78	-0.672426	0.052	0.229	4.26e-74	-0.177	ns
XPNPEP2	2.52e-78	-1.04119	0.022	0.167	4.9e-74	-0.145	ns
HAUS2	3.05e-78	-0.8873	0.037	0.198	5.92e-74	-0.161	ns
SPIRE2	3.11e-78	-0.940134	0.018	0.157	6.04e-74	-0.139	ns
SPATS2	3.68e-78	-0.611449	0.05	0.225	7.13e-74	-0.175	ns
UBFD1	3.69e-78	-0.604176	0.212	0.498	7.17e-74	-0.286	ns
FAM118A	3.98e-78	-0.445703	0.063	0.252	7.71e-74	-0.189	ns
CDK11B	4.93e-78	-0.374645	0.159	0.422	9.57e-74	-0.263	ns
FCF1	4.96e-78	-0.58229	0.178	0.444	9.63e-74	-0.266	ns
PKP1	5.16e-78	-1.74822	0.01	0.136	1e-73	-0.126	ns
ZNF326	5.99e-78	-0.471511	0.204	0.486	1.16e-73	-0.282	ns
TMEM128	6.1e-78	-0.678624	0.075	0.272	1.18e-73	-0.197	ns
SLC17A5	6.46e-78	-0.733172	0.036	0.196	1.25e-73	-0.16	ns
ARL6IP4	6.48e-78	-0.635808	0.106	0.327	1.26e-73	-0.221	ns
RPL28	6.49e-78	-0.229915	0.977	0.993	1.26e-73	-0.016	ns
SIRT1	6.62e-78	-0.44768	0.05	0.226	1.29e-73	-0.176	ns
TAF12	7.17e-78	-0.752216	0.055	0.235	1.39e-73	-0.18	ns
MOSMO	7.33e-78	-0.443492	0.045	0.215	1.42e-73	-0.17	ns
RPA2	7.77e-78	-0.373998	0.113	0.343	1.51e-73	-0.23	ns
HSD17B10	7.82e-78	-0.68399	0.178	0.442	1.52e-73	-0.264	ns
SMARCA5	7.92e-78	-0.551848	0.261	0.561	1.54e-73	-0.3	ns
AIFM1	8.86e-78	-0.484027	0.185	0.458	1.72e-73	-0.273	ns
RAD18	1.14e-77	-0.299339	0.073	0.269	2.21e-73	-0.196	ns
SSH2	1.27e-77	3.50616	0.303	0.138	2.46e-73	0.165	up
CSN3	1.28e-77	-3.26823	0.001	0.112	2.49e-73	-0.111	ns
DOK4	1.39e-77	4.06609	0.141	0.014	2.71e-73	0.127	ns
PSME3IP1	1.41e-77	-0.441078	0.102	0.322	2.74e-73	-0.22	ns
MRPL17	1.45e-77	-0.675239	0.237	0.523	2.81e-73	-0.286	ns
PEPD	1.45e-77	-0.439049	0.152	0.408	2.82e-73	-0.256	ns
CHD6	1.66e-77	-0.0949359	0.111	0.341	3.21e-73	-0.23	ns
TRMT61A	1.71e-77	-0.7298	0.097	0.309	3.31e-73	-0.212	ns
RSRC2	1.76e-77	-0.463962	0.199	0.481	3.42e-73	-0.282	ns
MRPL52	1.89e-77	-0.741374	0.397	0.692	3.66e-73	-0.295	ns
CUL2	1.89e-77	-0.272975	0.109	0.337	3.67e-73	-0.228	ns
RPL11	2.2e-77	-0.310929	0.967	0.992	4.27e-73	-0.025	ns
MTIF2	2.22e-77	-0.810539	0.023	0.168	4.31e-73	-0.145	ns
TTC27	2.55e-77	-0.176857	0.088	0.299	4.96e-73	-0.211	ns
MED28	2.7e-77	-0.587144	0.06	0.244	5.23e-73	-0.184	ns
ADAM9	3.46e-77	-0.458666	0.169	0.433	6.71e-73	-0.264	ns
ATP6AP1	3.52e-77	-0.688563	0.177	0.435	6.84e-73	-0.258	ns
ALYREF	3.64e-77	-0.664457	0.413	0.706	7.07e-73	-0.293	ns
SYNJ2BP	4.3e-77	-0.668392	0.054	0.231	8.34e-73	-0.177	ns
EBAG9	4.39e-77	-0.410422	0.05	0.224	8.53e-73	-0.174	ns
MTPN	4.55e-77	-0.489421	0.237	0.532	8.83e-73	-0.295	ns
MLX	4.64e-77	-0.575322	0.073	0.268	9e-73	-0.195	ns
SNRNP25	5.23e-77	-0.653762	0.324	0.617	1.01e-72	-0.293	ns
SLF1	5.54e-77	-0.435819	0.056	0.237	1.08e-72	-0.181	ns
FAM114A2	5.94e-77	-0.349849	0.086	0.292	1.15e-72	-0.206	ns
GFM1	6.02e-77	-0.470859	0.076	0.274	1.17e-72	-0.198	ns
YRDC	6.18e-77	-1.16802	0.029	0.179	1.2e-72	-0.15	down
ENSBTAG00000048488	6.71e-77	-1.59423	0.007	0.129	1.3e-72	-0.122	ns
SLC25A30	7.14e-77	-0.357746	0.05	0.223	1.38e-72	-0.173	ns
LASP1	8.23e-77	-0.540692	0.202	0.479	1.6e-72	-0.277	ns
COPS5	9.81e-77	-0.475883	0.136	0.378	1.9e-72	-0.242	ns
ENSBTAG00000014417	1.33e-76	-1.3516	0.013	0.144	2.58e-72	-0.131	ns
SNRPD3	1.38e-76	-0.57846	0.62	0.833	2.67e-72	-0.213	ns
METTL18	1.41e-76	-1.46543	0.019	0.157	2.73e-72	-0.138	ns
SPCS1	1.47e-76	-0.658205	0.246	0.532	2.85e-72	-0.286	ns
ND1	1.59e-76	0.538855	0.987	0.984	3.09e-72	0.003	ns
UBE2I.1	1.69e-76	-0.664837	0.222	0.507	3.27e-72	-0.285	ns
HEXA	1.78e-76	-0.54139	0.065	0.252	3.45e-72	-0.187	ns
ACOT9	1.91e-76	-0.504816	0.073	0.266	3.71e-72	-0.193	ns
NUDCD1	2.05e-76	-0.586721	0.047	0.217	3.98e-72	-0.17	ns
MED7	2.2e-76	-0.567331	0.058	0.237	4.26e-72	-0.179	ns
GOSR1	2.29e-76	-0.40258	0.11	0.334	4.45e-72	-0.224	ns
NDUFAF6	2.46e-76	-0.602141	0.054	0.23	4.77e-72	-0.176	ns
METTL3	2.48e-76	-0.551407	0.052	0.227	4.82e-72	-0.175	ns
NUDT9	2.58e-76	-0.777336	0.035	0.192	5.01e-72	-0.157	ns
SNW1	2.68e-76	-0.374563	0.171	0.437	5.2e-72	-0.266	ns
RBM18	3e-76	-0.500232	0.065	0.252	5.83e-72	-0.187	ns
C3	3.02e-76	-2.89743	0.001	0.11	5.85e-72	-0.109	ns
PKN2	3.06e-76	-0.0578664	0.111	0.34	5.93e-72	-0.229	ns
EIF2B3	3.13e-76	-0.283117	0.126	0.363	6.07e-72	-0.237	ns
PUM3	3.35e-76	-0.354928	0.147	0.399	6.5e-72	-0.252	ns
GPN1	3.46e-76	-0.991021	0.045	0.21	6.7e-72	-0.165	ns
NAA50	4.09e-76	-0.363925	0.157	0.413	7.94e-72	-0.256	ns
PDCD11	4.12e-76	-0.173137	0.108	0.334	8e-72	-0.226	ns
COPS4	4.28e-76	-0.435138	0.135	0.376	8.29e-72	-0.241	ns
C18H16orf87	4.53e-76	-0.363304	0.104	0.322	8.79e-72	-0.218	ns
BAIAP2L1	5.31e-76	2.64591	0.401	0.258	1.03e-71	0.143	ns
GTF2H2	5.53e-76	-0.709009	0.049	0.219	1.07e-71	-0.17	ns
CSNK2A1	6.49e-76	-0.384872	0.215	0.504	1.26e-71	-0.289	ns
ORAI1	6.58e-76	-0.497818	0.079	0.277	1.28e-71	-0.198	ns
DRG2	6.77e-76	-0.638027	0.082	0.283	1.31e-71	-0.201	ns
CENPN	7.43e-76	-0.814252	0.046	0.214	1.44e-71	-0.168	ns
CTH	8.43e-76	-0.925129	0.041	0.203	1.64e-71	-0.162	ns
ENSBTAG00000049842	8.46e-76	-0.201893	0.119	0.352	1.64e-71	-0.233	ns
UNC50	8.8e-76	-0.618902	0.092	0.299	1.71e-71	-0.207	ns
ATP5F1A	9.34e-76	-0.476299	0.694	0.884	1.81e-71	-0.19	ns
LARS1	9.72e-76	-0.341004	0.216	0.509	1.89e-71	-0.293	ns
RNH1	1.11e-75	-0.604937	0.547	0.785	2.16e-71	-0.238	ns
PAF1	1.18e-75	-0.526907	0.073	0.265	2.28e-71	-0.192	ns
CCDC12	1.23e-75	-0.499937	0.077	0.273	2.39e-71	-0.196	ns
LRRC1	1.27e-75	-0.200311	0.155	0.411	2.47e-71	-0.256	ns
LRRC47	1.3e-75	-0.648627	0.072	0.263	2.51e-71	-0.191	ns
GTF2IRD1	1.35e-75	-0.171079	0.06	0.242	2.61e-71	-0.182	ns
THOC3	1.36e-75	-0.582993	0.064	0.247	2.63e-71	-0.183	ns
MRPS27	1.42e-75	-0.241353	0.154	0.411	2.75e-71	-0.257	ns
UGT1A6	1.42e-75	-0.42021	0.094	0.305	2.76e-71	-0.211	ns
GPN2	1.47e-75	-0.830924	0.045	0.21	2.85e-71	-0.165	ns
NKAPD1	1.65e-75	-1.06932	0.038	0.197	3.19e-71	-0.159	down
MAP2K2	1.69e-75	-0.56986	0.189	0.454	3.28e-71	-0.265	ns
SYT14	1.75e-75	-0.229515	0.053	0.229	3.39e-71	-0.176	ns
GNAI3	1.75e-75	-0.455653	0.204	0.483	3.39e-71	-0.279	ns
HTATIP2	1.78e-75	-0.606061	0.072	0.262	3.46e-71	-0.19	ns
POMP	2.02e-75	-0.57854	0.605	0.818	3.91e-71	-0.213	ns
CORO7	2.02e-75	-0.34956	0.078	0.276	3.92e-71	-0.198	ns
ITM2B	2.17e-75	-0.702931	0.246	0.526	4.22e-71	-0.28	ns
PSMC2	2.2e-75	-0.55069	0.238	0.53	4.26e-71	-0.292	ns
PGRMC1	2.46e-75	-0.676934	0.073	0.263	4.78e-71	-0.19	ns
DNAJA1	2.57e-75	-0.67517	0.412	0.696	4.99e-71	-0.284	ns
DPH7	2.61e-75	-0.519922	0.076	0.27	5.06e-71	-0.194	ns
G3BP2	2.69e-75	-0.27949	0.092	0.301	5.21e-71	-0.209	ns
RPS6KC1	3.21e-75	-0.184763	0.077	0.275	6.22e-71	-0.198	ns
DALRD3	3.23e-75	-0.79364	0.047	0.215	6.27e-71	-0.168	ns
TCERG1	3.63e-75	-0.148461	0.15	0.407	7.03e-71	-0.257	ns
RIMOC1	3.87e-75	-0.452251	0.062	0.245	7.51e-71	-0.183	ns
LARGE2	4.68e-75	-1.35611	0.02	0.157	9.08e-71	-0.137	ns
REEP3	5.01e-75	-0.166998	0.075	0.269	9.72e-71	-0.194	ns
CCNB2	5.47e-75	-0.402888	0.098	0.31	1.06e-70	-0.212	ns
MANF	5.5e-75	-0.634065	0.487	0.751	1.07e-70	-0.264	ns
ATF7IP2	5.99e-75	-0.581893	0.047	0.213	1.16e-70	-0.166	ns
DUS4L	6.03e-75	-0.299057	0.11	0.333	1.17e-70	-0.223	ns
RNF113A	6.1e-75	-0.884027	0.04	0.199	1.18e-70	-0.159	ns
FRA10AC1	6.43e-75	-0.530919	0.055	0.231	1.25e-70	-0.176	ns
DDX3X	6.63e-75	-0.402669	0.183	0.451	1.29e-70	-0.268	ns
EPC1	6.77e-75	-0.237657	0.082	0.283	1.31e-70	-0.201	ns
AURKA	7.03e-75	-0.636946	0.191	0.456	1.36e-70	-0.265	ns
LIN37	7.27e-75	-1.00646	0.044	0.207	1.41e-70	-0.163	down
MRPL38	7.39e-75	-0.542641	0.206	0.483	1.43e-70	-0.277	ns
RSBN1L	8.05e-75	-0.316786	0.074	0.266	1.56e-70	-0.192	ns
NMNAT1	9.1e-75	-0.640165	0.062	0.243	1.77e-70	-0.181	ns
POP1	9.11e-75	-1.01399	0.023	0.163	1.77e-70	-0.14	ns
RAMAC	9.44e-75	-0.513852	0.144	0.387	1.83e-70	-0.243	ns
MND1	9.46e-75	-0.509244	0.077	0.272	1.83e-70	-0.195	ns
TBC1D9	9.58e-75	-0.332654	0.101	0.316	1.86e-70	-0.215	ns
TLE4	9.89e-75	-0.309526	0.072	0.264	1.92e-70	-0.192	ns
SDHAF3	1.05e-74	-0.417027	0.075	0.268	2.03e-70	-0.193	ns
ANP32A	1.25e-74	-0.492267	0.186	0.452	2.43e-70	-0.266	ns
SNX16	1.32e-74	-0.633354	0.04	0.2	2.57e-70	-0.16	ns
MTX2	1.35e-74	-0.31503	0.103	0.319	2.61e-70	-0.216	ns
ISCA2	1.39e-74	-0.814159	0.063	0.243	2.7e-70	-0.18	ns
TDG	1.39e-74	-0.496715	0.127	0.358	2.71e-70	-0.231	ns
RAP2B	1.46e-74	-0.472932	0.094	0.301	2.84e-70	-0.207	ns
C15H11orf34	1.57e-74	2.82962	0.126	0.008	3.05e-70	0.118	ns
PREB	1.59e-74	-0.753924	0.058	0.235	3.09e-70	-0.177	ns
MRPS24	1.66e-74	-0.659834	0.255	0.537	3.22e-70	-0.282	ns
PDZK1	1.75e-74	-0.28815	0.099	0.313	3.39e-70	-0.214	ns
ARRB1	1.86e-74	-0.576085	0.03	0.179	3.6e-70	-0.149	ns
SZRD1	1.92e-74	-0.440684	0.165	0.421	3.73e-70	-0.256	ns
WDR5	2.23e-74	-0.398874	0.155	0.407	4.32e-70	-0.252	ns
H4C4	2.57e-74	-0.737926	0.046	0.211	4.99e-70	-0.165	ns
B3GNT4	2.57e-74	-2.64162	0.005	0.119	5e-70	-0.114	ns
GAS2L1	2.91e-74	-0.819569	0.035	0.189	5.65e-70	-0.154	ns
TYW3	3.06e-74	-1.1974	0.016	0.146	5.93e-70	-0.13	ns
SARS1	3.1e-74	-0.542889	0.177	0.438	6.02e-70	-0.261	ns
COX5A	3.38e-74	-0.515575	0.683	0.869	6.55e-70	-0.186	ns
PGPEP1	3.83e-74	-0.824866	0.037	0.193	7.43e-70	-0.156	ns
PARM1	3.9e-74	-0.91714	0.026	0.17	7.56e-70	-0.144	ns
TSR2	3.96e-74	-0.436661	0.092	0.299	7.68e-70	-0.207	ns
ATP6AP2	4.1e-74	-0.365035	0.159	0.413	7.95e-70	-0.254	ns
GART	4.14e-74	-0.338339	0.117	0.343	8.03e-70	-0.226	ns
LRR1	4.6e-74	-1.24062	0.019	0.153	8.93e-70	-0.134	ns
RPS7	4.75e-74	-0.332869	0.929	0.982	9.22e-70	-0.053	ns
LRRC8A	4.84e-74	-0.383369	0.068	0.253	9.39e-70	-0.185	ns
VARS1	4.87e-74	-0.424383	0.178	0.439	9.45e-70	-0.261	ns
RAB4A	4.92e-74	-0.459836	0.057	0.233	9.54e-70	-0.176	ns
ARAP2	5.92e-74	-0.266263	0.065	0.25	1.15e-69	-0.185	ns
TIMM17A	5.94e-74	-0.982038	0.042	0.202	1.15e-69	-0.16	ns
PNPT1	6.79e-74	-0.411861	0.053	0.225	1.32e-69	-0.172	ns
ATG101	6.86e-74	-0.500404	0.112	0.333	1.33e-69	-0.221	ns
HOOK1	7.21e-74	-0.222733	0.098	0.31	1.4e-69	-0.212	ns
EIF4A2	7.26e-74	-0.437667	0.22	0.504	1.41e-69	-0.284	ns
FBXO22	7.7e-74	-0.799518	0.037	0.192	1.49e-69	-0.155	ns
RTF2	8.38e-74	-0.409807	0.138	0.379	1.63e-69	-0.241	ns
ENO3	8.99e-74	2.60282	0.331	0.168	1.74e-69	0.163	up
CHP1	9.51e-74	-0.26667	0.158	0.413	1.85e-69	-0.255	ns
ABCF1	9.94e-74	-0.626622	0.267	0.546	1.93e-69	-0.279	ns
CMC2	1.02e-73	-0.625828	0.302	0.595	1.98e-69	-0.293	ns
CRIPT	1.03e-73	-0.439825	0.162	0.416	1.99e-69	-0.254	ns
MANBAL	1.06e-73	-0.45785	0.105	0.321	2.06e-69	-0.216	ns
SNRNP40	1.09e-73	-0.306842	0.107	0.325	2.12e-69	-0.218	ns
VDAC3	1.13e-73	-0.556779	0.092	0.296	2.19e-69	-0.204	ns
HNRNPH3	1.14e-73	-0.572191	0.238	0.521	2.21e-69	-0.283	ns
ABCG5	1.14e-73	-3.67429	0.003	0.113	2.22e-69	-0.11	ns
PHLPP2	1.37e-73	-0.599711	0.03	0.177	2.66e-69	-0.147	ns
MOB4	1.44e-73	-0.401381	0.13	0.363	2.79e-69	-0.233	ns
CA4	1.66e-73	-1.64977	0.016	0.144	3.23e-69	-0.128	ns
DPH5	1.89e-73	-0.602727	0.044	0.206	3.67e-69	-0.162	ns
SLC10A1	1.95e-73	-1.02915	0.169	0.398	3.78e-69	-0.229	down
DLL3	1.97e-73	-0.899738	0.04	0.198	3.83e-69	-0.158	ns
PTPRA	2.02e-73	-0.366124	0.184	0.45	3.91e-69	-0.266	ns
F5	2.06e-73	4.3263	0.133	0.013	4e-69	0.12	ns
ENSBTAG00000038770	2.16e-73	-0.766598	0.05	0.217	4.19e-69	-0.167	ns
IRX4	2.19e-73	3.74786	0.173	0.035	4.24e-69	0.138	ns
BUB3	2.27e-73	-0.495677	0.228	0.511	4.4e-69	-0.283	ns
BRD9	2.4e-73	-0.339926	0.142	0.385	4.67e-69	-0.243	ns
TNFRSF19	2.49e-73	-1.5738	0.008	0.125	4.84e-69	-0.117	ns
RPS26	2.55e-73	-0.508854	0.943	0.981	4.94e-69	-0.038	ns
CLDN3	2.56e-73	-1.27046	0.016	0.146	4.97e-69	-0.13	ns
DUSP11	2.57e-73	-0.758194	0.058	0.233	4.98e-69	-0.175	ns
MERTK	2.67e-73	-0.300921	0.069	0.256	5.19e-69	-0.187	ns
SF3A3	2.74e-73	-0.322276	0.169	0.429	5.32e-69	-0.26	ns
COX7B	2.85e-73	-0.640894	0.579	0.83	5.52e-69	-0.251	ns
ERH	3.15e-73	-0.636224	0.511	0.753	6.11e-69	-0.242	ns
GNAS	3.36e-73	-0.892665	0.035	0.186	6.53e-69	-0.151	ns
ENSBTAG00000048228	3.67e-73	-0.730796	0.039	0.194	7.12e-69	-0.155	ns
RRP1	3.71e-73	-0.507259	0.092	0.296	7.21e-69	-0.204	ns
STXBP6	3.82e-73	-0.358645	0.037	0.192	7.41e-69	-0.155	ns
COX6A1	3.84e-73	-0.497404	0.716	0.902	7.44e-69	-0.186	ns
ENSBTAG00000051364	3.92e-73	0.962679	0.679	0.624	7.6e-69	0.055	ns
C28H1orf131	3.95e-73	-0.352134	0.146	0.392	7.66e-69	-0.246	ns
TTC7A	4.09e-73	-0.388738	0.035	0.187	7.93e-69	-0.152	ns
CEP135	4.24e-73	-0.710791	0.036	0.189	8.24e-69	-0.153	ns
UROD	4.26e-73	-0.520728	0.111	0.328	8.26e-69	-0.217	ns
NUBP1	4.36e-73	-0.686925	0.056	0.229	8.46e-69	-0.173	ns
ENSBTAG00000000269	4.4e-73	-0.421561	0.055	0.227	8.54e-69	-0.172	ns
SLC35B1	4.47e-73	-0.609403	0.254	0.538	8.67e-69	-0.284	ns
KLF10	5.04e-73	-0.283905	0.065	0.247	9.77e-69	-0.182	ns
NAA10	5.59e-73	-0.589306	0.244	0.525	1.08e-68	-0.281	ns
DNAJB11	6.03e-73	-0.429417	0.196	0.467	1.17e-68	-0.271	ns
UQCC2	6.4e-73	-0.650654	0.333	0.627	1.24e-68	-0.294	ns
SRP72	7.42e-73	-0.139132	0.129	0.366	1.44e-68	-0.237	ns
LUZP1	8.06e-73	-0.347984	0.135	0.372	1.56e-68	-0.237	ns
GALNT7	8.53e-73	0.0329262	0.095	0.304	1.65e-68	-0.209	ns
TOP1	9.05e-73	-0.46065	0.245	0.537	1.76e-68	-0.292	ns
EIF2B1	9.47e-73	-0.820347	0.04	0.196	1.84e-68	-0.156	ns
WTAP	9.99e-73	-0.326327	0.166	0.422	1.94e-68	-0.256	ns
TMED5	1.11e-72	-0.637326	0.036	0.189	2.16e-68	-0.153	ns
MAP4	1.14e-72	-0.223434	0.105	0.32	2.22e-68	-0.215	ns
CRYBG2	1.16e-72	-0.871973	0.019	0.152	2.25e-68	-0.133	ns
SDE2	1.2e-72	-0.455663	0.054	0.225	2.33e-68	-0.171	ns
WDR3	1.22e-72	-0.486899	0.045	0.208	2.37e-68	-0.163	ns
AMN	1.29e-72	-1.05379	0.027	0.169	2.51e-68	-0.142	ns
GRINA	1.31e-72	-0.663	0.036	0.188	2.54e-68	-0.152	ns
MRPL44	1.46e-72	-1.02034	0.047	0.209	2.83e-68	-0.162	down
LAGE3	1.47e-72	-0.707346	0.084	0.28	2.86e-68	-0.196	ns
SMU1	1.64e-72	-0.379039	0.107	0.323	3.19e-68	-0.216	ns
SMIM7	1.64e-72	-0.552462	0.202	0.472	3.19e-68	-0.27	ns
HAUS1	1.74e-72	-1.05111	0.028	0.172	3.37e-68	-0.144	ns
RNF126	1.76e-72	-0.544706	0.204	0.473	3.41e-68	-0.269	ns
NADK	1.87e-72	-0.554265	0.083	0.279	3.62e-68	-0.196	ns
GRTP1	1.96e-72	-0.463063	0.153	0.399	3.8e-68	-0.246	ns
MKKS	2.37e-72	-0.586495	0.288	0.585	4.59e-68	-0.297	ns
UQCC6	2.42e-72	-0.595915	0.201	0.467	4.7e-68	-0.266	ns
EIF6	2.65e-72	-0.67199	0.334	0.613	5.14e-68	-0.279	ns
PTPN11	2.76e-72	-0.231868	0.172	0.434	5.35e-68	-0.262	ns
ELOB	2.79e-72	-0.659567	0.458	0.74	5.41e-68	-0.282	ns
PRPF4	3.05e-72	-0.514913	0.058	0.232	5.92e-68	-0.174	ns
NUP50	3.34e-72	-0.242279	0.123	0.35	6.48e-68	-0.227	ns
WARS2	3.36e-72	-0.483726	0.064	0.242	6.52e-68	-0.178	ns
UBE2T	3.53e-72	-0.585217	0.086	0.282	6.84e-68	-0.196	ns
CCZ1	3.66e-72	-0.378392	0.146	0.39	7.1e-68	-0.244	ns
LDHB	3.75e-72	-0.621851	0.548	0.779	7.28e-68	-0.231	ns
ADGRG6	3.91e-72	-0.0561355	0.086	0.286	7.59e-68	-0.2	ns
USP14	4.02e-72	-0.335533	0.138	0.376	7.79e-68	-0.238	ns
LZIC	4.19e-72	-1.19379	0.022	0.156	8.13e-68	-0.134	ns
DYNLRB1	4.45e-72	-0.642041	0.314	0.611	8.63e-68	-0.297	ns
WDR89	4.68e-72	-0.377656	0.067	0.248	9.07e-68	-0.181	ns
YTHDC1	4.74e-72	-0.392276	0.164	0.416	9.19e-68	-0.252	ns
TNS3	4.92e-72	-0.469709	0.036	0.188	9.55e-68	-0.152	ns
PSAT1	5.6e-72	-1.76722	0.01	0.128	1.09e-67	-0.118	ns
KANSL2	5.74e-72	-0.830707	0.031	0.176	1.11e-67	-0.145	ns
PAG1	5.94e-72	-1.88277	0.006	0.119	1.15e-67	-0.113	ns
PSMD10	6.21e-72	-0.606341	0.074	0.26	1.2e-67	-0.186	ns
ENSBTAG00000048722	6.45e-72	-0.521738	0.129	0.359	1.25e-67	-0.23	ns
ADAT1	6.52e-72	-0.569993	0.039	0.193	1.26e-67	-0.154	ns
MTHFD1	6.86e-72	-0.172024	0.109	0.326	1.33e-67	-0.217	ns
DUSP12	6.97e-72	-0.582755	0.056	0.226	1.35e-67	-0.17	ns
MAD1L1	7.02e-72	-0.773105	0.051	0.217	1.36e-67	-0.166	ns
ANKZF1	7.82e-72	-0.821896	0.026	0.166	1.52e-67	-0.14	ns
PDHB	8.12e-72	-0.570871	0.237	0.518	1.58e-67	-0.281	ns
COMT	8.44e-72	-0.555743	0.275	0.559	1.64e-67	-0.284	ns
TBC1D15	8.72e-72	-0.439577	0.045	0.206	1.69e-67	-0.161	ns
MRI1	1.01e-71	-0.607587	0.081	0.273	1.95e-67	-0.192	ns
LIG1	1.06e-71	-0.33445	0.087	0.286	2.06e-67	-0.199	ns
ETF1	1.12e-71	-0.536152	0.281	0.572	2.17e-67	-0.291	ns
SRSF11	1.39e-71	-0.365089	0.223	0.507	2.7e-67	-0.284	ns
UBE2B	1.46e-71	-0.42759	0.106	0.317	2.84e-67	-0.211	ns
ZP3	1.54e-71	-3.05805	0	0.101	2.98e-67	-0.101	ns
ZMYND19	1.55e-71	-0.39283	0.109	0.325	3e-67	-0.216	ns
XPOT	1.92e-71	-0.208922	0.059	0.233	3.73e-67	-0.174	ns
LYPLA1	2.16e-71	-0.430359	0.148	0.389	4.2e-67	-0.241	ns
FANCI	2.33e-71	-0.218066	0.046	0.208	4.53e-67	-0.162	ns
FABP3	2.45e-71	-0.53102	0.268	0.571	4.76e-67	-0.303	ns
MAP1LC3B	2.53e-71	-0.437758	0.139	0.372	4.9e-67	-0.233	ns
POLR2C	2.56e-71	-0.758197	0.055	0.223	4.97e-67	-0.168	ns
SCLY	2.65e-71	-2.29339	0.005	0.115	5.15e-67	-0.11	ns
RAB24	2.73e-71	-0.743461	0.043	0.201	5.3e-67	-0.158	ns
SMARCD1	2.78e-71	-0.856836	0.035	0.184	5.39e-67	-0.149	ns
METTL17	2.83e-71	-0.923827	0.029	0.17	5.48e-67	-0.141	ns
SPTLC2	2.87e-71	-0.0935558	0.115	0.337	5.57e-67	-0.222	ns
TMEM170A	3.03e-71	-0.282388	0.072	0.258	5.87e-67	-0.186	ns
RPL27	3.09e-71	-0.44311	0.902	0.968	6e-67	-0.066	ns
NHSL1	3.17e-71	-0.177856	0.064	0.243	6.15e-67	-0.179	ns
KAT6B	3.32e-71	-0.341762	0.148	0.39	6.44e-67	-0.242	ns
MMADHC	3.51e-71	-0.493511	0.239	0.524	6.81e-67	-0.285	ns
ORC3	3.63e-71	-0.260916	0.071	0.255	7.05e-67	-0.184	ns
THUMPD3	3.88e-71	-0.34526	0.07	0.253	7.53e-67	-0.183	ns
STOML2	3.91e-71	-0.55705	0.267	0.552	7.59e-67	-0.285	ns
USP48	3.91e-71	-0.239741	0.113	0.332	7.59e-67	-0.219	ns
ZBTB7A	3.98e-71	-0.257842	0.049	0.214	7.72e-67	-0.165	ns
VPS26A	4.04e-71	-0.515844	0.225	0.501	7.84e-67	-0.276	ns
FAAP24	4.06e-71	-0.719029	0.039	0.192	7.89e-67	-0.153	ns
WDR18	4.09e-71	-0.438897	0.109	0.322	7.93e-67	-0.213	ns
IER2	4.12e-71	-0.582446	0.123	0.343	7.99e-67	-0.22	ns
GRHPR	4.59e-71	-0.344916	0.101	0.31	8.9e-67	-0.209	ns
POLR2G	4.86e-71	-0.661106	0.355	0.639	9.43e-67	-0.284	ns
EPS15L1	4.97e-71	-0.191014	0.07	0.254	9.64e-67	-0.184	ns
NUDT19	5.46e-71	-1.29276	0.024	0.16	1.06e-66	-0.136	ns
GNA14	5.53e-71	-0.58609	0.046	0.206	1.07e-66	-0.16	ns
TRIM25	6.03e-71	3.44134	0.188	0.046	1.17e-66	0.142	ns
MRPL54	6.19e-71	-0.592425	0.311	0.605	1.2e-66	-0.294	ns
GOSR2	6.28e-71	-0.380006	0.115	0.333	1.22e-66	-0.218	ns
TMBIM6	6.52e-71	0.633175	0.861	0.83	1.26e-66	0.031	ns
CCNE1	7.14e-71	-0.544399	0.032	0.178	1.39e-66	-0.146	ns
POLRMT	7.59e-71	-0.626668	0.036	0.186	1.47e-66	-0.15	ns
MAPKAPK2	7.64e-71	-0.312144	0.059	0.232	1.48e-66	-0.173	ns
TMEM14C	8.37e-71	-0.594784	0.272	0.558	1.62e-66	-0.286	ns
RNF167	9.16e-71	-0.476996	0.163	0.411	1.78e-66	-0.248	ns
POLR3B	9.6e-71	-0.202201	0.077	0.266	1.86e-66	-0.189	ns
GPS1	1.01e-70	-0.451284	0.141	0.373	1.95e-66	-0.232	ns
PROCA1	1.04e-70	-1.52482	0.01	0.128	2.01e-66	-0.118	ns
TBC1D8	1.04e-70	-0.277863	0.047	0.208	2.03e-66	-0.161	ns
STRAP	1.09e-70	-0.522253	0.098	0.302	2.12e-66	-0.204	ns
ENDOU	1.18e-70	-2.31703	0.002	0.105	2.28e-66	-0.103	ns
FUNDC1	1.21e-70	-0.576273	0.096	0.299	2.34e-66	-0.203	ns
MELK	1.32e-70	-0.311834	0.089	0.287	2.56e-66	-0.198	ns
NAA60	1.39e-70	-0.413612	0.083	0.275	2.7e-66	-0.192	ns
ENSBTAG00000055111	1.4e-70	-2.80479	0	0.101	2.72e-66	-0.101	ns
TMPO	1.54e-70	-0.281909	0.105	0.315	2.99e-66	-0.21	ns
YTHDF2	1.58e-70	-0.281026	0.05	0.215	3.06e-66	-0.165	ns
PRR15	1.73e-70	3.20866	0.143	0.019	3.35e-66	0.124	ns
AOX1	1.74e-70	-1.33111	0.014	0.136	3.37e-66	-0.122	ns
SYPL1	1.79e-70	-0.504629	0.1	0.305	3.46e-66	-0.205	ns
MRPS18A	1.86e-70	-0.431345	0.145	0.382	3.62e-66	-0.237	ns
HAX1	1.87e-70	-0.449343	0.083	0.277	3.62e-66	-0.194	ns
ADRM1	1.89e-70	-0.437773	0.189	0.448	3.66e-66	-0.259	ns
SRA1	1.96e-70	-0.4719	0.132	0.36	3.81e-66	-0.228	ns
TMEM60	1.96e-70	-0.705729	0.072	0.254	3.81e-66	-0.182	ns
NUDC	1.98e-70	-0.635331	0.376	0.665	3.83e-66	-0.289	ns
TOR3A	2.09e-70	-0.516732	0.061	0.235	4.05e-66	-0.174	ns
SAP30BP	2.1e-70	-0.484976	0.067	0.246	4.07e-66	-0.179	ns
CTSD	2.1e-70	-0.664883	0.263	0.515	4.07e-66	-0.252	ns
MLXIP	2.17e-70	-0.259897	0.087	0.284	4.2e-66	-0.197	ns
TMEM41B	2.21e-70	-0.228355	0.117	0.338	4.28e-66	-0.221	ns
MAPK3	2.26e-70	-0.760277	0.038	0.189	4.38e-66	-0.151	ns
TRAF4	2.47e-70	-0.541301	0.06	0.232	4.8e-66	-0.172	ns
GTF2H1	2.65e-70	-0.218915	0.143	0.383	5.15e-66	-0.24	ns
TYW1	2.66e-70	-0.121231	0.047	0.208	5.16e-66	-0.161	ns
H2AJ	2.94e-70	1.41448	0.567	0.527	5.7e-66	0.04	ns
RPLP2	3.14e-70	-0.252553	0.988	0.997	6.09e-66	-0.009	ns
DHX16	3.18e-70	-0.499785	0.03	0.172	6.16e-66	-0.142	ns
PPA2	3.25e-70	-0.365739	0.138	0.372	6.3e-66	-0.234	ns
WDR70	3.38e-70	0.0364953	0.13	0.364	6.56e-66	-0.234	ns
RAB3IL1	3.59e-70	-1.71064	0.015	0.137	6.96e-66	-0.122	ns
MAPRE1	3.66e-70	-0.469733	0.227	0.508	7.1e-66	-0.281	ns
C11H2orf49	3.73e-70	-0.554741	0.052	0.217	7.24e-66	-0.165	ns
REEP1	3.83e-70	-0.163345	0.143	0.382	7.42e-66	-0.239	ns
GRHL3	3.9e-70	-2.62778	0.006	0.116	7.56e-66	-0.11	ns
SNX19	3.97e-70	-0.101106	0.08	0.272	7.71e-66	-0.192	ns
AURKC	4e-70	-1.72006	0.014	0.137	7.77e-66	-0.123	ns
PLAA	4.16e-70	-0.184852	0.079	0.269	8.08e-66	-0.19	ns
UBE2A	4.78e-70	-0.514293	0.129	0.353	9.27e-66	-0.224	ns
LRRC59	4.92e-70	-0.501396	0.173	0.425	9.55e-66	-0.252	ns
NAA25	5.32e-70	0.0373433	0.111	0.328	1.03e-65	-0.217	ns
GRSF1	5.48e-70	-0.270616	0.105	0.316	1.06e-65	-0.211	ns
RAD50	5.86e-70	-0.365406	0.226	0.505	1.14e-65	-0.279	ns
USE1	6.34e-70	-0.535438	0.117	0.333	1.23e-65	-0.216	ns
PDIA4	6.45e-70	-0.443499	0.216	0.489	1.25e-65	-0.273	ns
SRP54	6.86e-70	-0.236662	0.081	0.273	1.33e-65	-0.192	ns
EIF1AD	6.94e-70	-0.847915	0.035	0.181	1.35e-65	-0.146	ns
CCN1	7.71e-70	-0.456452	0.063	0.237	1.5e-65	-0.174	ns
TMED1	7.9e-70	-0.631165	0.07	0.249	1.53e-65	-0.179	ns
CTU2	7.98e-70	-0.570849	0.057	0.226	1.55e-65	-0.169	ns
IRF7	8.42e-70	-1.02954	0.033	0.177	1.63e-65	-0.144	ns
EXOSC10	8.74e-70	-0.232872	0.072	0.255	1.7e-65	-0.183	ns
PUF60	9.17e-70	-0.638725	0.339	0.616	1.78e-65	-0.277	ns
FOXRED1	9.36e-70	-0.961493	0.035	0.181	1.81e-65	-0.146	ns
UBE2D1	9.55e-70	-0.738413	0.035	0.181	1.85e-65	-0.146	ns
KRT7	1.02e-69	1.54623	0.477	0.342	1.98e-65	0.135	ns
RAD17	1.1e-69	-0.456927	0.041	0.195	2.13e-65	-0.154	ns
CCNC	1.42e-69	-0.349855	0.108	0.319	2.76e-65	-0.211	ns
CCDC47	1.46e-69	-0.182895	0.131	0.358	2.83e-65	-0.227	ns
MAT2B	1.46e-69	-0.410248	0.057	0.225	2.83e-65	-0.168	ns
DOHH	1.8e-69	-0.420197	0.101	0.307	3.49e-65	-0.206	ns
TWF1	1.86e-69	-0.340792	0.096	0.298	3.6e-65	-0.202	ns
ZMIZ2	1.9e-69	-0.60462	0.034	0.18	3.69e-65	-0.146	ns
HIBCH	1.91e-69	-0.334561	0.094	0.293	3.7e-65	-0.199	ns
AKTIP	1.98e-69	-0.49968	0.07	0.249	3.84e-65	-0.179	ns
ALG14	2.05e-69	-0.572465	0.064	0.238	3.97e-65	-0.174	ns
TPI1	2.38e-69	0.680769	0.786	0.796	4.62e-65	-0.01	ns
RPS16	2.57e-69	-0.34688	0.912	0.971	4.99e-65	-0.059	ns
TMEM223	2.84e-69	-0.508438	0.173	0.423	5.51e-65	-0.25	ns
BZW1	3.44e-69	-0.567893	0.543	0.774	6.67e-65	-0.231	ns
POLE2	3.65e-69	-1.00013	0.025	0.16	7.08e-65	-0.135	ns
DAP3	4.11e-69	-0.244659	0.162	0.41	7.98e-65	-0.248	ns
DNMT3B	4.15e-69	-0.239279	0.036	0.184	8.05e-65	-0.148	ns
WRAP53	4.53e-69	-0.41039	0.058	0.226	8.78e-65	-0.168	ns
ERLIN1	4.67e-69	-0.300416	0.073	0.255	9.05e-65	-0.182	ns
SRSF2	4.7e-69	-0.603731	0.457	0.724	9.12e-65	-0.267	ns
NDC80	5.08e-69	-0.204183	0.057	0.226	9.86e-65	-0.169	ns
PTTG1	5.16e-69	-0.58101	0.294	0.587	1e-64	-0.293	ns
PYCR2	5.27e-69	-1.31491	0.023	0.154	1.02e-64	-0.131	ns
PRMT3	5.48e-69	-0.124849	0.082	0.273	1.06e-64	-0.191	ns
GTF3C3	5.73e-69	-0.502166	0.05	0.21	1.11e-64	-0.16	ns
BTF3L4	5.84e-69	-0.52808	0.219	0.491	1.13e-64	-0.272	ns
VPS4A	6.06e-69	-0.329506	0.129	0.354	1.18e-64	-0.225	ns
POLR1H	6.18e-69	-1.01317	0.04	0.19	1.2e-64	-0.15	down
TRDMT1	6.48e-69	-0.611782	0.028	0.165	1.26e-64	-0.137	ns
SLX9	6.8e-69	-0.40385	0.189	0.45	1.32e-64	-0.261	ns
TEX10	7.69e-69	-0.407763	0.173	0.422	1.49e-64	-0.249	ns
DDX1	9.8e-69	-0.280528	0.206	0.483	1.9e-64	-0.277	ns
PFAS	9.86e-69	-1.28476	0.01	0.125	1.91e-64	-0.115	ns
SEC62	1e-68	-0.581854	0.31	0.6	1.94e-64	-0.29	ns
MAFG	1.01e-68	-0.56007	0.04	0.19	1.96e-64	-0.15	ns
ANAPC10	1.02e-68	-0.505512	0.058	0.226	1.98e-64	-0.168	ns
TIMM10B	1.04e-68	-1.02915	0.044	0.197	2.01e-64	-0.153	down
STIM2	1.13e-68	-0.43771	0.127	0.346	2.2e-64	-0.219	ns
CNPY2	1.16e-68	-0.540937	0.204	0.467	2.25e-64	-0.263	ns
NAE1	1.17e-68	-0.27057	0.095	0.295	2.27e-64	-0.2	ns
CDK1	1.22e-68	-0.453975	0.135	0.361	2.37e-64	-0.226	ns
FMNL2	1.31e-68	3.40614	0.28	0.126	2.54e-64	0.154	up
TOR1A	1.33e-68	-0.379293	0.086	0.278	2.59e-64	-0.192	ns
EMC10	1.34e-68	-0.484108	0.205	0.466	2.6e-64	-0.261	ns
RRAGA	1.44e-68	-0.418144	0.148	0.384	2.79e-64	-0.236	ns
[truncated: 17,401 more rows]

## Sheet: Third_vs_Second
gene	p_val	avg_log2FC	pct.1	pct.2	p_val_adj	Difference	change
CXADR	0	2.39999	0.853	0.208	0	0.645	up
DYRK1A	0	2.17668	0.859	0.19	0	0.669	up
GNB4	0	2.58637	0.689	0.1	0	0.589	up
PIK3CA	0	2.33113	0.662	0.092	0	0.57	up
PLCL2	0	3.99377	0.537	0.038	0	0.499	up
NAALADL2	0	3.37452	0.886	0.18	0	0.706	up
PLD1	0	3.65945	0.629	0.042	0	0.587	up
BBX	0	2.58149	0.925	0.291	0	0.634	up
CD47	0	2.57139	0.677	0.103	0	0.574	up
PPM1L	0	2.42413	0.803	0.141	0	0.662	up
CCNL1	0	2.81696	0.718	0.086	0	0.632	up
MME	0	5.35622	0.741	0.054	0	0.687	up
RNF13	0	2.14615	0.641	0.08	0	0.561	up
WWTR1	0	2.82433	0.789	0.131	0	0.658	up
RASA2	0	2.31292	0.714	0.113	0	0.601	up
SLC25A36	0	2.48965	0.647	0.069	0	0.578	up
PPP2R3A	0	3.15969	0.736	0.091	0	0.645	up
INHCA	0	3.51279	0.466	0.017	0	0.449	up
CAPN6	0	5.17103	0.509	0.018	0	0.491	up
SAT1	0	2.26221	0.958	0.449	0	0.509	up
MOSPD1	0	2.71335	0.623	0.069	0	0.554	up
RTL5	0	4.5912	0.609	0.015	0	0.594	up
S100G	0	4.91736	0.853	0.107	0	0.746	up
GCA	0	4.17168	0.748	0.047	0	0.701	up
MARCHF7	0	1.90115	0.775	0.147	0	0.628	up
TANC1	0	2.38837	0.649	0.075	0	0.574	up
FMNL2	0	2.26838	0.921	0.28	0	0.641	up
CLIC4	0	5.41184	0.785	0.056	0	0.729	up
LUZP1	0	2.36254	0.743	0.135	0	0.608	up
SLC40A1	0	5.12367	0.484	0.015	0	0.469	up
KIF5C	0	2.12643	0.791	0.161	0	0.63	up
SLC39A10	0	3.2603	0.674	0.054	0	0.62	up
DHRS9	0	2.61643	0.825	0.208	0	0.617	up
PRDX1	0	-1.91114	0.745	0.987	0	-0.242	down
FOXJ3	0	2.07479	0.726	0.118	0	0.608	up
IL6R	0	2.37366	0.67	0.082	0	0.588	up
CCN1	0	3.30174	0.603	0.063	0	0.54	up
LRRFIP1	0	2.57797	0.837	0.188	0	0.649	up
HSD3B1	0	4.23281	0.611	0.06	0	0.551	up
GIPC2	0	2.26763	0.715	0.117	0	0.598	up
DCAF6	0	2.08067	0.744	0.125	0	0.619	up
F11R	0	2.45457	0.747	0.113	0	0.634	up
GNG12	0	2.60339	0.707	0.096	0	0.611	up
CD48	0	3.53265	0.507	0.031	0	0.476	up
DNAJC6	0	2.72873	0.64	0.072	0	0.568	up
OSBPL9	0	2.4233	0.842	0.164	0	0.678	up
KRT18	0	-2.50079	0.71	0.992	0	-0.282	down
KRT8	0	-2.07234	0.872	1	0	-0.128	ns
YAF2	0	2.86055	0.64	0.065	0	0.575	up
SOX5	0	4.2379	0.85	0.134	0	0.716	up
ADIPOR2	0	2.51876	0.65	0.086	0	0.564	up
GNS	0	3.03873	0.656	0.053	0	0.603	up
SRGAP1	0	2.25172	0.767	0.139	0	0.628	up
EPS8	0	4.39291	0.805	0.077	0	0.728	up
PLBD1	0	2.3854	0.93	0.31	0	0.62	up
WASL	0	2.02878	0.831	0.172	0	0.659	up
TSPAN13	0	3.48776	0.536	0.031	0	0.505	up
UBE2H	0	2.58192	0.763	0.124	0	0.639	up
TRA2A	0	2.04285	0.779	0.156	0	0.623	up
KMT2C	0	2.49507	0.948	0.327	0	0.621	up
CASD1	0	2.69506	0.722	0.097	0	0.625	up
ESYT2	0	2.47617	0.675	0.074	0	0.601	up
GNAI1	0	2.46594	0.839	0.171	0	0.668	up
IFRD1	0	3.40821	0.675	0.078	0	0.597	up
PALS2	0	3.20264	0.702	0.06	0	0.642	up
IGFBP3	0	3.94308	0.612	0.046	0	0.566	up
SHROOM3	0	2.53014	0.916	0.243	0	0.673	up
RASGEF1B	0	4.20404	0.442	0.009	0	0.433	up
SGMS2	0	2.56642	0.753	0.118	0	0.635	up
BMPR1B	0	2.41211	0.733	0.129	0	0.604	up
PDLIM5	0	2.16325	0.83	0.179	0	0.651	up
ENSBTAG00000051457	0	2.16198	0.816	0.16	0	0.656	up
FRYL	0	2.35545	0.829	0.157	0	0.672	up
TUT7	0	2.15671	0.621	0.07	0	0.551	up
AOPEP	0	2.97907	0.781	0.097	0	0.684	up
DOCK8	0	2.4999	0.789	0.125	0	0.664	up
TLE4	0	2.82887	0.614	0.072	0	0.542	up
NEK1	0	2.78689	0.564	0.046	0	0.518	up
IFNT3	0	-1.64393	0.266	0.974	0	-0.708	down
IFNT2	0	-1.90723	0.277	0.938	0	-0.661	down
RAPGEF6	0	2.14775	0.689	0.101	0	0.588	up
CSNK1G3	0	2.78374	0.694	0.092	0	0.602	up
DNAJB1	0	2.98371	0.755	0.162	0	0.593	up
SLC26A2	0	3.94432	0.462	0.013	0	0.449	up
DNASE2	0	2.73268	0.835	0.232	0	0.603	up
AFF4	0	2.15067	0.869	0.209	0	0.66	up
UBE2B	0	2.66198	0.72	0.106	0	0.614	up
RNF130	0	4.07839	0.607	0.027	0	0.58	up
CYSTM1	0	3.57954	0.698	0.082	0	0.616	up
FBXL17	0	2.6779	0.901	0.242	0	0.659	up
FNIP1	0	2.57546	0.836	0.156	0	0.68	up
FBXO11	0	2.06855	0.855	0.187	0	0.668	up
DENND1A	0	2.19686	0.879	0.224	0	0.655	up
RMND5A	0	2.67423	0.563	0.046	0	0.517	up
PELI1	0	2.34057	0.644	0.078	0	0.566	up
ANXA4	0	2.20985	0.745	0.13	0	0.615	up
ENSBTAG00000054755	0	2.67566	0.592	0.054	0	0.538	up
PUM2	0	2.00408	0.86	0.196	0	0.664	up
VSNL1	0	4.33385	0.532	0.02	0	0.512	up
CRIM1	0	3.21091	0.873	0.168	0	0.705	up
SLC8A1	0	7.19643	0.459	0.003	0	0.456	up
MTA3	0	2.68838	0.771	0.149	0	0.622	up
NT5E	0	3.00285	0.639	0.068	0	0.571	up
NHSL1	0	3.81732	0.637	0.064	0	0.573	up
REPS1	0	2.29488	0.87	0.202	0	0.668	up
PHACTR2	0	4.93318	0.482	0.014	0	0.468	up
STXBP5	0	2.58671	0.789	0.146	0	0.643	up
RNF146	0	2.56121	0.598	0.062	0	0.536	up
RNF217	0	2.72912	0.701	0.103	0	0.598	up
KATNBL1	0	2.23016	0.802	0.158	0	0.644	up
DCAF5	0	3.38495	0.796	0.085	0	0.711	up
SUSD6	0	1.9632	0.724	0.107	0	0.617	up
NUMB	0	2.41382	0.793	0.145	0	0.648	up
NPC2	0	3.25477	0.848	0.336	0	0.512	up
RPS6KA5	0	3.95744	0.58	0.026	0	0.554	up
TLN2	0	3.25998	0.615	0.067	0	0.548	up
MYO1E	0	3.60799	0.969	0.313	0	0.656	up
WDR72	0	4.61121	0.489	0.018	0	0.471	up
SYNE2	0	2.79712	0.839	0.13	0	0.709	up
LCP1	0	6.59156	0.736	0.013	0	0.723	up
SUPT20H	0	2.38084	0.755	0.112	0	0.643	up
PAN3	0	2.06092	0.907	0.251	0	0.656	up
ATP12A	0	3.29797	0.656	0.038	0	0.618	up
LMO7	0	2.56788	0.939	0.318	0	0.621	up
MTRF1	0	3.36977	0.645	0.074	0	0.571	up
ARGLU1	0	2.02472	0.931	0.285	0	0.646	up
CELF1	0	2.04717	0.681	0.095	0	0.586	up
FNBP4	0	2.12128	0.718	0.103	0	0.615	up
C15H11orf34	0	6.29795	0.908	0.126	0	0.782	up
SIK3	0	2.52931	0.833	0.168	0	0.665	up
CD44	0	6.27676	0.577	0.015	0	0.562	up
SOX6	0	3.87035	0.564	0.034	0	0.53	up
TEAD1	0	2.54308	0.865	0.188	0	0.677	up
ABI1	0	2.1955	0.687	0.099	0	0.588	up
TKDP1	0	-1.90611	0.482	0.996	0	-0.514	down
CTSA	0	2.70678	0.682	0.087	0	0.595	up
B4GALT5	0	2.6178	0.799	0.144	0	0.655	up
KIF16B	0	3.04158	0.787	0.107	0	0.68	up
NSMCE2	0	2.30369	0.841	0.184	0	0.657	up
PCMTD1	0	2.88459	0.533	0.039	0	0.494	up
STAU2	0	3.69947	0.647	0.04	0	0.607	up
STK3	0	2.46012	0.746	0.1	0	0.646	up
CD46	0	3.1866	0.925	0.229	0	0.696	up
AKT3	0	5.06154	0.694	0.044	0	0.65	up
DENND1B	0	2.51647	0.887	0.202	0	0.685	up
NEK7	0	2.42134	0.81	0.162	0	0.648	up
ATP1B1	0	3.97067	0.717	0.048	0	0.669	up
SLC19A2	0	3.38052	0.498	0.026	0	0.472	up
PLEKHA6	0	2.80733	0.652	0.064	0	0.588	up
MARK1	0	2.4187	0.779	0.142	0	0.637	up
ENAH	0	2.55659	0.837	0.154	0	0.683	up
C16H1orf21	0	3.48968	0.913	0.212	0	0.701	up
FBXO21	0	2.46005	0.693	0.092	0	0.601	up
SPPL3	0	2.46774	0.814	0.129	0	0.685	up
MTMR3	0	2.6237	0.661	0.065	0	0.596	up
FHIP1A	0	2.54276	0.653	0.076	0	0.577	up
SH3D19	0	2.58951	0.626	0.073	0	0.553	up
GAB1	0	2.5236	0.668	0.088	0	0.58	up
RNF150	0	5.71135	0.707	0.016	0	0.691	up
GPBP1	0	2.16978	0.811	0.176	0	0.635	up
PLPP1	0	3.94137	0.642	0.033	0	0.609	up
RICTOR	0	2.23665	0.717	0.105	0	0.612	up
MYO10	0	4.32961	0.594	0.025	0	0.569	up
STK10	0	2.54359	0.861	0.174	0	0.687	up
CPEB4	0	2.61899	0.716	0.094	0	0.622	up
ARHGEF28	0	2.94376	0.74	0.135	0	0.605	up
CDK7	0	3.00239	0.554	0.039	0	0.515	up
MAST4	0	2.84258	0.804	0.173	0	0.631	up
RCOR1	0	2.60225	0.759	0.109	0	0.65	up
PRPF39	0	2.14464	0.705	0.093	0	0.612	up
ITPK1	0	3.06861	0.601	0.053	0	0.548	up
ANKRD11	0	1.75791	0.739	0.121	0	0.618	up
PEG3	0	3.16408	0.823	0.205	0	0.618	up
FTO	0	2.34368	0.819	0.184	0	0.635	up
HERPUD1	0	2.4398	0.731	0.137	0	0.594	up
NFATC3	0	2.33186	0.673	0.094	0	0.579	up
ENSBTAG00000052086	0	2.50851	0.632	0.077	0	0.555	up
NFAT5	0	2.57294	0.581	0.054	0	0.527	up
CEACAM19	0	3.78216	0.775	0.066	0	0.709	up
ZFHX3	0	2.32678	0.849	0.19	0	0.659	up
ANKRD27	0	2.64169	0.546	0.042	0	0.504	up
RHPN2	0	2.57881	0.635	0.066	0	0.569	up
PPP1R15A	0	4.71983	0.48	0.011	0	0.469	up
WSB1	0	2.24853	0.751	0.133	0	0.618	up
FBXL20	0	3.91928	0.746	0.067	0	0.679	up
WIPF2	0	2.51891	0.633	0.056	0	0.577	up
KRT19	0	-1.32001	0.912	0.999	0	-0.087	ns
APPBP2	0	2.73125	0.728	0.091	0	0.637	up
GRN	0	2.28709	0.641	0.083	0	0.558	up
PIAS2	0	2.47995	0.684	0.074	0	0.61	up
MBD2	0	2.05326	0.623	0.071	0	0.552	up
RIOK3	0	2.92479	0.749	0.136	0	0.613	up
PTPRM	0	2.76753	0.788	0.127	0	0.661	up
ANKRD12	0	2.26795	0.841	0.148	0	0.693	up
LRRFIP2	0	2.12546	0.899	0.236	0	0.663	up
GOLGA4	0	1.9753	0.947	0.363	0	0.584	up
OXSR1	0	2.38134	0.836	0.176	0	0.66	up
MITF	0	5.47348	0.579	0.021	0	0.558	up
VGLL4	0	2.49193	0.858	0.169	0	0.689	up
RCAN2	0	2.8162	0.753	0.141	0	0.612	up
HSPA1A	0	3.50513	0.807	0.171	0	0.636	up
ILRUN	0	2.35599	0.738	0.115	0	0.623	up
PPARD	0	2.46848	0.752	0.118	0	0.634	up
LIPA	0	4.43303	0.469	0.015	0	0.454	up
TNKS2	0	4.18039	0.787	0.105	0	0.682	up
CCDC186	0	2.54339	0.811	0.134	0	0.677	up
SHTN1	0	2.8149	0.932	0.266	0	0.666	up
PHLDA2	0	5.75551	0.734	0.069	0	0.665	up
CDKN1C	0	2.90818	0.827	0.279	0	0.548	up
ST14	0	2.27016	0.792	0.163	0	0.629	up
MS4A8	0	3.31671	0.709	0.081	0	0.628	up
PAG8	0	3.60738	0.904	0.472	0	0.432	up
CREBZF	0	2.30139	0.617	0.066	0	0.551	up
GAB2	0	2.8626	0.627	0.067	0	0.56	up
ZDHHC13	0	2.88732	0.657	0.061	0	0.596	up
RTKN2	0	8.11686	0.464	0.001	0	0.463	up
JMJD1C	0	2.00646	0.871	0.201	0	0.67	up
SRGN	0	4.15697	0.499	0.006	0	0.493	up
DLG5	0	2.283	0.808	0.151	0	0.657	up
CCSER2	0	2.43805	0.759	0.101	0	0.658	up
GALNT2	0	2.26396	0.803	0.167	0	0.636	up
ARID4B	0	2.05443	0.735	0.118	0	0.617	up
ASAH1	0	3.82087	0.523	0.032	0	0.491	up
ADAM9	0	2.77077	0.853	0.169	0	0.684	up
SMURF1	0	1.9749	0.823	0.169	0	0.654	up
LMTK2	0	2.29254	0.735	0.105	0	0.63	up
COX3	0	-1.73529	0.826	1	0	-0.174	down
IFNT	0	-2.14211	0.259	0.977	0	-0.718	down
CPA4	0	4.99502	0.493	0.008	0	0.485	up
CTTNBP2NL	1.60225e-307	3.89256	0.477	0.022	3.10836e-303	0.455	up
LITAF	1.83799e-307	1.99578	0.816	0.196	3.56569e-303	0.62	up
RAB11FIP1	1.91374e-307	2.18743	0.672	0.097	3.71265e-303	0.575	up
TRIO	2.09971e-307	2.00749	0.682	0.098	4.07345e-303	0.584	up
PNISR	3.97213e-307	1.74535	0.749	0.128	7.70594e-303	0.621	up
RERE	6.94845e-307	2.33792	0.666	0.096	1.348e-302	0.57	up
B2M	1.00874e-306	3.93391	0.641	0.101	1.95695e-302	0.54	up
MOV10	1.72793e-306	2.05875	0.73	0.13	3.35219e-302	0.6	up
GPBP1L1	1.8189e-306	1.82628	0.725	0.12	3.52866e-302	0.605	up
ACVR2A	2.80289e-306	2.96657	0.556	0.051	5.4376e-302	0.505	up
HBP1	1.53215e-305	2.28409	0.636	0.083	2.97237e-301	0.553	up
PGRMC2	2.16489e-305	2.00787	0.711	0.117	4.19989e-301	0.594	up
WDFY2	7.92983e-305	2.33998	0.715	0.124	1.53839e-300	0.591	up
JUN	5.28676e-304	2.56064	0.859	0.307	1.02563e-299	0.552	up
NSD3	7.37638e-304	1.85099	0.839	0.185	1.43102e-299	0.654	up
CTSZ	8.48891e-304	3.71292	0.607	0.077	1.64685e-299	0.53	up
KMT2E	1.17108e-303	1.88275	0.711	0.115	2.2719e-299	0.596	up
PTGER3	2.88197e-303	6.47191	0.407	0.001	5.59103e-299	0.406	up
TANC2	1.23921e-302	4.51336	0.501	0.036	2.40406e-298	0.465	up
TAOK1	1.17996e-301	1.89314	0.733	0.125	2.28912e-297	0.608	up
COP1	2.72333e-301	2.175	0.718	0.12	5.28327e-297	0.598	up
FAM168A	7.06541e-301	2.73604	0.555	0.052	1.37069e-296	0.503	up
MSX1	3.47621e-300	3.81107	0.472	0.023	6.74385e-296	0.449	up
CDK13	4.08768e-300	1.73322	0.797	0.158	7.93011e-296	0.639	up
NKTR	1.19975e-299	1.65681	0.792	0.153	2.32751e-295	0.639	up
ENSBTAG00000049814	3.04431e-299	2.0523	0.925	0.304	5.90596e-295	0.621	up
RPS28	7.48957e-299	-1.4347	0.835	0.995	1.45298e-294	-0.16	down
PDE8A	1.65198e-298	1.9265	0.794	0.167	3.20483e-294	0.627	up
N4BP2L2	2.27335e-298	1.85744	0.692	0.108	4.4103e-294	0.584	up
CLDN1	3.17028e-298	3.135	0.502	0.034	6.15035e-294	0.468	up
TOR1AIP2	3.46556e-298	1.74722	0.791	0.162	6.72319e-294	0.629	up
ZYG11B	4.73244e-298	2.09944	0.698	0.116	9.18093e-294	0.582	up
KANSL1	4.85714e-298	1.85867	0.891	0.235	9.42285e-294	0.656	up
TP53BP2	1.36719e-297	1.98765	0.707	0.117	2.65235e-293	0.59	up
AGO3	2.48362e-297	1.88727	0.674	0.099	4.81822e-293	0.575	up
GNA14	2.60212e-297	3.52151	0.529	0.046	5.04811e-293	0.483	up
MIA3	3.43036e-297	1.73716	0.715	0.116	6.6549e-293	0.599	up
TMEM106C	5.04903e-297	2.28241	0.689	0.121	9.79512e-293	0.568	up
ARSL	8.2708e-297	1.94449	0.708	0.122	1.60454e-292	0.586	up
PTPRA	1.19213e-296	1.7412	0.827	0.184	2.31273e-292	0.643	up
GOLGB1	4.63251e-296	1.73417	0.815	0.174	8.98708e-292	0.641	up
INPP5D	6.80938e-296	2.86676	0.552	0.054	1.32102e-291	0.498	up
LUC7L	8.63106e-296	1.8038	0.84	0.197	1.67443e-291	0.643	up
GSK3B	1.09799e-295	1.795	0.895	0.243	2.1301e-291	0.652	up
TMF1	2.28955e-295	2.20744	0.609	0.075	4.44173e-291	0.534	up
ETNK1	7.55854e-295	3.20665	0.481	0.027	1.46636e-290	0.454	up
HNRNPH1	7.76109e-295	1.84197	0.95	0.362	1.50565e-290	0.588	up
TRIM24	1.53415e-293	2.20112	0.605	0.073	2.97625e-289	0.532	up
KPNA4	2.12909e-293	2.19074	0.812	0.197	4.13043e-289	0.615	up
SMURF2	8.64428e-293	1.83483	0.763	0.145	1.67699e-288	0.618	up
TINAGL1	2.7886e-292	4.26136	0.435	0.014	5.40989e-288	0.421	up
ADGRA3	6.95649e-292	2.39984	0.581	0.065	1.34956e-287	0.516	up
PTBP2	7.60585e-292	1.92655	0.61	0.073	1.47554e-287	0.537	up
CSNK1A1	1.26935e-291	1.8947	0.907	0.276	2.46255e-287	0.631	up
ECM1	2.54849e-291	3.50263	0.464	0.024	4.94408e-287	0.44	up
SULT1E1	3.12321e-291	5.64827	0.444	0.018	6.05904e-287	0.426	up
CYTH1	3.48894e-291	3.1292	0.499	0.036	6.76855e-287	0.463	up
RSPRY1	5.50205e-291	1.99833	0.615	0.078	1.0674e-286	0.537	up
SNX14	5.64673e-290	1.82929	0.633	0.084	1.09546e-285	0.549	up
INPP4A	8.56237e-290	2.08189	0.714	0.13	1.6611e-285	0.584	up
MBOAT1	1.57454e-289	3.62531	0.449	0.019	3.05461e-285	0.43	up
ATOSA	1.62049e-289	2.86623	0.492	0.032	3.14374e-285	0.46	up
TNKS	5.77578e-289	1.85313	0.681	0.107	1.1205e-284	0.574	up
IQANK1	6.97232e-288	2.34382	0.525	0.044	1.35263e-283	0.481	up
AKAP9	8.60224e-288	1.56186	0.737	0.129	1.66883e-283	0.608	up
KCNK5	8.78529e-288	3.20542	0.479	0.029	1.70435e-283	0.45	up
NRK	1.66681e-287	8.48888	0.386	0.001	3.23362e-283	0.385	up
DUSP1	1.84479e-287	3.25532	0.493	0.036	3.5789e-283	0.457	up
USP12	4.4491e-287	2.30615	0.575	0.065	8.63125e-283	0.51	up
MNAT1	8.87172e-287	1.75747	0.796	0.169	1.72111e-282	0.627	up
MRTFA	3.82598e-286	2.68475	0.506	0.039	7.4224e-282	0.467	up
PEAK1	5.66137e-286	2.25352	0.619	0.085	1.0983e-281	0.534	up
UBAP1	6.04687e-286	1.73046	0.661	0.099	1.17309e-281	0.562	up
TOR1AIP1	1.04034e-285	1.97099	0.602	0.075	2.01825e-281	0.527	up
ATXN2	1.05161e-285	1.82033	0.833	0.198	2.04012e-281	0.635	up
IPO9	1.87469e-285	1.74476	0.707	0.12	3.63689e-281	0.587	up
RAB24	2.2049e-285	2.76359	0.515	0.043	4.27751e-281	0.472	up
CEP350	2.94597e-285	1.6974	0.803	0.173	5.71517e-281	0.63	up
BNC2	1.16441e-284	4.05223	0.465	0.028	2.25896e-280	0.437	up
TAPBP	2.89322e-284	2.94221	0.474	0.029	5.61285e-280	0.445	up
KLF6	2.99449e-284	2.04787	0.865	0.289	5.8093e-280	0.576	up
PLEKHA1	7.96189e-284	1.84047	0.733	0.138	1.54461e-279	0.595	up
CXCL16	1.57733e-283	4.48428	0.409	0.009	3.06002e-279	0.4	up
SWAP70	2.87422e-283	1.98378	0.941	0.441	5.57598e-279	0.5	up
TEC	3.29134e-283	2.20624	0.554	0.057	6.3852e-279	0.497	up
LAMC1	1.12951e-282	1.91109	0.77	0.161	2.19125e-278	0.609	up
UBE4B	2.0015e-282	1.79424	0.871	0.235	3.88292e-278	0.636	up
FYB2	2.39891e-282	5.36934	0.397	0.006	4.65389e-278	0.391	up
FDX1	4.13825e-282	2.08253	0.747	0.168	8.02821e-278	0.579	up
ELF1	5.27243e-282	2.214	0.807	0.202	1.02285e-277	0.605	up
TNFRSF1A	6.71344e-282	2.47845	0.492	0.035	1.30241e-277	0.457	up
SLC2A12	7.50452e-282	4.27332	0.403	0.007	1.45588e-277	0.396	up
FGD4	7.84786e-282	2.01744	0.969	0.423	1.52249e-277	0.546	up
SH3YL1	4.79257e-281	1.8038	0.679	0.113	9.29759e-277	0.566	up
XPO6	6.06119e-281	1.89055	0.701	0.125	1.17587e-276	0.576	up
GPATCH8	6.9225e-281	1.6934	0.744	0.142	1.34297e-276	0.602	up
OSBPL10	1.29908e-280	1.84561	0.703	0.124	2.52022e-276	0.579	up
ENSBTAG00000048402	1.52316e-280	1.66028	0.583	0.067	2.95492e-276	0.516	up
ZFYVE1	2.05389e-280	2.61696	0.473	0.029	3.98455e-276	0.444	up
SC5D	4.1307e-280	1.98498	0.646	0.1	8.01355e-276	0.546	up
TTC14	4.6756e-280	1.59691	0.669	0.104	9.07067e-276	0.565	up
GK5	7.44678e-280	2.80394	0.511	0.045	1.44468e-275	0.466	up
ADAM28	1.7316e-279	8.3197	0.382	0.002	3.3593e-275	0.38	up
NCOA2	5.66041e-279	2.30723	0.901	0.283	1.09812e-274	0.618	up
TSC22D1.1	7.64281e-279	2.7863	0.535	0.054	1.48271e-274	0.481	up
MEF2A	9.28012e-279	2.18248	0.675	0.117	1.80034e-274	0.558	up
UST	9.39697e-279	3.71033	0.487	0.039	1.82301e-274	0.448	up
LMBR1	2.46975e-278	1.81323	0.766	0.162	4.79131e-274	0.604	up
MARCHF5	3.43289e-278	1.85669	0.611	0.083	6.6598e-274	0.528	up
DIAPH2.1	7.33363e-278	2.00498	0.755	0.159	1.42272e-273	0.596	up
BTBD7	7.85268e-278	1.64466	0.743	0.144	1.52342e-273	0.599	up
SNX16	8.9623e-278	2.34397	0.501	0.04	1.73869e-273	0.461	up
RPS19	9.71249e-278	-1.35966	0.82	0.985	1.88422e-273	-0.165	down
SH2D4A	1.44329e-277	2.62082	0.645	0.107	2.79998e-273	0.538	up
USP9X	2.35816e-277	2.4211	0.887	0.294	4.57484e-273	0.593	up
CDC42SE2	2.93963e-277	1.7668	0.863	0.23	5.70288e-273	0.633	up
UAP1	3.63713e-277	2.0964	0.675	0.118	7.05603e-273	0.557	up
SLC27A1	3.64419e-277	1.92023	0.602	0.08	7.06973e-273	0.522	up
FNIP2	1.73943e-276	2.41499	0.604	0.084	3.37449e-272	0.52	up
STK19	3.66155e-276	2.30986	0.526	0.05	7.10341e-272	0.476	up
WAC	4.05028e-276	1.65276	0.799	0.179	7.85755e-272	0.62	up
ACAP2	5.84887e-276	1.86105	0.584	0.071	1.13468e-271	0.513	up
TBPL1	6.65112e-276	3.10275	0.649	0.112	1.29032e-271	0.537	up
COL3A1	1.26925e-275	3.39987	0.476	0.035	2.46235e-271	0.441	up
RNASET2	1.29873e-275	2.13344	0.631	0.098	2.51954e-271	0.533	up
TACC1	1.89417e-275	4.10791	0.412	0.012	3.67469e-271	0.4	up
CCNT2	2.19235e-275	1.84249	0.579	0.069	4.25317e-271	0.51	up
IWS1	2.40672e-275	1.55204	0.689	0.115	4.66905e-271	0.574	up
ATF3	3.13313e-275	3.08064	0.517	0.052	6.07827e-271	0.465	up
RAP2C	1.80269e-274	1.9585	0.718	0.144	3.49722e-270	0.574	up
MARK3	2.59357e-274	1.67442	0.796	0.181	5.03153e-270	0.615	up
ZFC3H1	3.28073e-274	1.66429	0.704	0.126	6.36462e-270	0.578	up
PRP1	3.98809e-274	4.24665	0.381	0.004	7.73689e-270	0.377	up
PPT1	4.83762e-274	2.19338	0.523	0.05	9.38499e-270	0.473	up
MAP4K3	6.76149e-274	1.63791	0.868	0.226	1.31173e-269	0.642	up
KDM2A	1.10889e-273	1.83363	0.697	0.125	2.15125e-269	0.572	up
GGH	1.43687e-273	2.42873	0.537	0.059	2.78752e-269	0.478	up
YEATS2	5.02255e-273	1.79526	0.615	0.086	9.74376e-269	0.529	up
TYK2	6.28734e-273	2.79914	0.447	0.024	1.21974e-268	0.423	up
USP32	8.29632e-273	2.0205	0.668	0.116	1.60949e-268	0.552	up
RNF11	8.64599e-273	1.96701	0.557	0.063	1.67732e-268	0.494	up
CREBRF	1.20554e-272	3.66934	0.411	0.013	2.33875e-268	0.398	up
MERTK	2.01523e-272	2.07056	0.57	0.069	3.90954e-268	0.501	up
MAML2	2.65925e-272	3.13204	0.683	0.148	5.15894e-268	0.535	up
DIP2B	3.42031e-272	1.73619	0.902	0.27	6.63539e-268	0.632	up
CRYBG3	3.60334e-272	2.45539	0.524	0.052	6.99047e-268	0.472	up
CYTB	3.82114e-272	-1.69825	0.791	0.998	7.41301e-268	-0.207	down
CCNT1	6.9054e-272	2.04037	0.545	0.059	1.33965e-267	0.486	up
UBR5	7.37059e-272	1.69504	0.86	0.23	1.42989e-267	0.63	up
APPL1	1.27229e-271	1.62332	0.627	0.091	2.46824e-267	0.536	up
ALDH2	1.61175e-271	1.88022	0.656	0.111	3.12679e-267	0.545	up
CPD	2.3538e-271	1.75516	0.613	0.085	4.56638e-267	0.528	up
MAPKAPK2	2.41782e-271	2.27772	0.541	0.059	4.69057e-267	0.482	up
SLC16A7	5.15208e-271	4.01531	0.41	0.014	9.99504e-267	0.396	up
WWC1	8.03381e-271	1.98133	0.889	0.284	1.55856e-266	0.605	up
HERC4	1.01506e-270	1.66419	0.725	0.137	1.96921e-266	0.588	up
PAGE4	1.621e-270	3.99296	0.74	0.236	3.14475e-266	0.504	up
MYO9A	1.71561e-270	1.96635	0.679	0.119	3.32827e-266	0.56	up
CYRIB	2.50019e-270	1.67646	0.643	0.097	4.85036e-266	0.546	up
NFE2L2	2.65433e-270	1.78579	0.865	0.248	5.14939e-266	0.617	up
TOPORS	3.54473e-270	1.82397	0.543	0.058	6.87678e-266	0.485	up
CDYL2	4.54335e-270	5.28456	0.391	0.008	8.81409e-266	0.383	up
LGMN	5.23593e-270	3.31118	0.505	0.049	1.01577e-265	0.456	up
BAZ2B	6.79809e-270	1.89552	0.597	0.08	1.31883e-265	0.517	up
USP53	1.03359e-269	2.30174	0.507	0.046	2.00517e-265	0.461	up
HMGXB3	1.1931e-269	1.98259	0.586	0.078	2.31461e-265	0.508	up
RPL15	1.31588e-269	-1.65466	0.739	0.929	2.55281e-265	-0.19	down
CHIC2	1.46975e-269	2.3687	0.499	0.043	2.85132e-265	0.456	up
FOXO4	1.80495e-269	2.70762	0.501	0.046	3.5016e-265	0.455	up
CYBB	3.37256e-269	1.97436	0.586	0.077	6.54277e-265	0.509	up
REEP3	3.95536e-269	2.14931	0.575	0.075	7.67341e-265	0.5	up
UBE2R2	5.75596e-269	1.66305	0.693	0.125	1.11666e-264	0.568	up
USP15	6.91184e-269	1.65363	0.894	0.272	1.3409e-264	0.622	up
IL6ST	3.078e-268	1.62151	0.761	0.159	5.97133e-264	0.602	up
DSTN	3.90709e-268	-1.31238	0.854	0.984	7.57975e-264	-0.13	ns
ATRN	4.57953e-268	1.83062	0.64	0.101	8.88429e-264	0.539	up
USP47	1.09611e-267	1.58242	0.783	0.172	2.12645e-263	0.611	up
BRWD1	1.57295e-267	1.88932	0.888	0.262	3.05152e-263	0.626	up
PIP5K1A	2.84003e-267	1.9013	0.55	0.062	5.50966e-263	0.488	up
APBB2	2.8428e-267	1.71278	0.854	0.229	5.51503e-263	0.625	up
WDFY3	4.18896e-267	1.78601	0.763	0.166	8.12659e-263	0.597	up
ZNRF3	4.45799e-267	3.00164	0.5	0.047	8.6485e-263	0.453	up
SECISBP2L	4.65967e-267	1.92083	0.585	0.078	9.03976e-263	0.507	up
ANXA11	6.17366e-267	1.70378	0.653	0.106	1.19769e-262	0.547	up
PDPK1	8.44683e-267	2.41341	0.48	0.037	1.63868e-262	0.443	up
RPS26	1.00456e-266	-1.45077	0.741	0.943	1.94885e-262	-0.202	down
MACF1	1.27437e-266	1.73848	0.903	0.275	2.47228e-262	0.628	up
RAB32	3.27333e-266	2.10814	0.566	0.072	6.35026e-262	0.494	up
MET	5.02343e-266	1.78449	0.685	0.123	9.74545e-262	0.562	up
PABIR2	5.74472e-266	5.17672	0.401	0.014	1.11448e-261	0.387	up
STRN3	7.61372e-266	1.56271	0.823	0.201	1.47706e-261	0.622	up
NDEL1	1.14674e-265	2.0035	0.605	0.088	2.22468e-261	0.517	up
FNBP1L	1.32662e-265	1.81342	0.862	0.247	2.57364e-261	0.615	up
PHLPP2	1.38073e-265	2.97332	0.454	0.03	2.67862e-261	0.424	up
ATP6V0D2	1.766e-265	2.14712	0.597	0.089	3.42604e-261	0.508	up
ARL6IP5	2.07526e-265	2.22863	0.597	0.09	4.026e-261	0.507	up
ELK4	5.87322e-265	2.49685	0.467	0.034	1.1394e-260	0.433	up
DOCK7	1.38821e-264	1.99528	0.615	0.092	2.69314e-260	0.523	up
DIP2C	1.94325e-264	2.03464	0.627	0.099	3.76991e-260	0.528	up
TMEM41B	1.9443e-264	1.96703	0.659	0.117	3.77195e-260	0.542	up
JUND	3.4522e-264	2.41485	0.659	0.136	6.69726e-260	0.523	up
SLC35F5	5.91404e-264	2.00456	0.569	0.073	1.14732e-259	0.496	up
ND3	3.31957e-263	-1.58206	0.783	0.991	6.43997e-259	-0.208	down
PSEN1	4.80681e-263	1.60652	0.616	0.09	9.32521e-259	0.526	up
TMEM87B	5.94968e-263	1.988	0.523	0.054	1.15424e-258	0.469	up
AEBP2	8.85843e-263	2.01333	0.568	0.073	1.71854e-258	0.495	up
FAR1	1.02889e-262	1.74802	0.712	0.138	1.99604e-258	0.574	up
CNOT2	1.5155e-262	1.39324	0.718	0.136	2.94008e-258	0.582	up
ATG16L1	4.52195e-262	1.72076	0.602	0.087	8.77258e-258	0.515	up
PAWR	5.04325e-262	1.66225	0.843	0.227	9.7839e-258	0.616	up
RASAL2	5.50215e-262	1.85624	0.783	0.188	1.06742e-257	0.595	up
ZFP36L1	6.40526e-262	1.87552	0.723	0.157	1.24262e-257	0.566	up
LGALS3BP	1.07248e-261	3.26334	0.483	0.047	2.0806e-257	0.436	up
LAPTM4B	1.16439e-261	2.87931	0.41	0.016	2.25892e-257	0.394	up
KATNA1	1.37095e-261	1.48114	0.601	0.083	2.65965e-257	0.518	up
ARID4A	1.53465e-261	1.64424	0.617	0.092	2.97722e-257	0.525	up
SPART	1.7984e-261	1.71562	0.621	0.097	3.48889e-257	0.524	up
TNFRSF19	8.33742e-261	4.42908	0.379	0.008	1.61746e-256	0.371	up
KLHL15	1.08173e-260	2.63459	0.466	0.036	2.09855e-256	0.43	up
SLC38A9	1.14248e-260	1.6123	0.789	0.184	2.21641e-256	0.605	up
OGA	1.2948e-260	1.54452	0.82	0.199	2.51191e-256	0.621	up
TSC1	1.84082e-260	2.49889	0.459	0.033	3.57119e-256	0.426	up
MAP2K1	2.75596e-260	1.72981	0.671	0.12	5.34655e-256	0.551	up
IFNGR1	4.11787e-260	2.79994	0.447	0.03	7.98867e-256	0.417	up
MED13	5.89938e-260	1.5681	0.735	0.151	1.14448e-255	0.584	up
SMPDL3A	1.02e-259	4.22926	0.381	0.009	1.9788e-255	0.372	up
RIC1	1.31739e-259	1.71759	0.618	0.094	2.55573e-255	0.524	up
SLC38A2	1.31982e-259	2.05244	0.552	0.069	2.56044e-255	0.483	up
FCGRT	2.42491e-259	3.47983	0.411	0.018	4.70433e-255	0.393	up
PRRC2B	4.5719e-259	1.60131	0.65	0.108	8.86949e-255	0.542	up
TRIP11	4.9233e-259	1.53778	0.59	0.08	9.5512e-255	0.51	up
LARGE2	9.38612e-259	3.11073	0.417	0.02	1.82091e-254	0.397	up
GLCE	2.22814e-258	2.28846	0.595	0.089	4.3226e-254	0.506	up
ZNF654	3.45035e-258	1.73311	0.617	0.096	6.69368e-254	0.521	up
KHDC4	3.937e-258	2.18231	0.524	0.059	7.63778e-254	0.465	up
TLK1	9.52229e-258	1.6775	0.637	0.104	1.84732e-253	0.533	up
ATP11A	1.09796e-257	2.70802	0.461	0.035	2.13005e-253	0.426	up
GARIN1A	1.2559e-257	3.1028	0.424	0.023	2.43644e-253	0.401	up
PRKCI	2.1517e-257	1.5483	0.68	0.125	4.1743e-253	0.555	up
FBP1	2.45126e-257	3.94383	0.397	0.015	4.75545e-253	0.382	up
ITCH	2.58789e-257	1.72442	0.725	0.15	5.02051e-253	0.575	up
FMR1	3.13308e-257	1.93889	0.617	0.098	6.07818e-253	0.519	up
RAB31	4.54978e-257	1.81175	0.659	0.117	8.82658e-253	0.542	up
GADD45A	6.76363e-257	2.013	0.619	0.104	1.31214e-252	0.515	up
ARIH1	1.23199e-256	1.60206	0.817	0.206	2.39006e-252	0.611	up
CLK1	1.5637e-256	1.76526	0.587	0.083	3.03357e-252	0.504	up
ITGB4	1.96406e-256	4.19951	0.379	0.009	3.81028e-252	0.37	up
INO80	1.1581e-255	1.39471	0.695	0.13	2.24672e-251	0.565	up
FERMT1	1.18889e-255	1.73699	0.664	0.119	2.30644e-251	0.545	up
TAF1D	1.62065e-255	1.461	0.691	0.129	3.14405e-251	0.562	up
APP	5.18339e-255	1.66022	0.728	0.157	1.00558e-250	0.571	up
ARHGAP24	6.18139e-255	8.38413	0.346	0	1.19919e-250	0.346	up
TBC1D23	1.5381e-254	2.0525	0.473	0.04	2.98391e-250	0.433	up
ERBB2	1.77534e-254	1.47759	0.755	0.164	3.44415e-250	0.591	up
CRAMP1	1.86566e-254	2.26843	0.461	0.036	3.61938e-250	0.425	up
MICU1	2.27224e-254	1.78641	0.854	0.244	4.40816e-250	0.61	up
PABPC1	2.49433e-254	-1.12233	0.95	0.992	4.839e-250	-0.042	ns
GIGYF2	4.18088e-254	1.45988	0.779	0.18	8.11092e-250	0.599	up
TPD52	4.54543e-254	1.77172	0.841	0.235	8.81813e-250	0.606	up
IQGAP1	8.02514e-254	1.73594	0.906	0.311	1.55688e-249	0.595	up
PLEKHA5	1.26558e-253	2.18194	0.969	0.462	2.45523e-249	0.507	up
MAP4	1.27263e-253	1.81092	0.629	0.105	2.4689e-249	0.524	up
SLC37A1	1.42429e-253	1.48749	0.719	0.143	2.76312e-249	0.576	up
UBE2E1	3.71222e-253	1.66063	0.706	0.144	7.2017e-249	0.562	up
TOB1	4.58504e-253	2.72081	0.456	0.036	8.89497e-249	0.42	up
CEACAM1	5.08836e-253	3.49525	0.405	0.019	9.87141e-249	0.386	up
SMG7	5.47856e-253	1.48086	0.677	0.123	1.06284e-248	0.554	up
MAPK1	8.22328e-253	1.66651	0.746	0.171	1.59532e-248	0.575	up
ATP5ME	8.3826e-253	-2.0979	0.646	0.833	1.62622e-248	-0.187	down
ENPP1	1.10023e-252	2.357	0.487	0.046	2.13445e-248	0.441	up
NDFIP2	3.31993e-252	1.55854	0.747	0.168	6.44067e-248	0.579	up
DOCK9	3.41842e-252	1.62134	0.869	0.257	6.63174e-248	0.612	up
KLC1	1.11208e-251	1.42988	0.621	0.097	2.15743e-247	0.524	up
ARHGAP32	1.19695e-251	1.58112	0.811	0.203	2.32209e-247	0.608	up
TENT2	1.25064e-251	1.89584	0.539	0.066	2.42625e-247	0.473	up
SHROOM2	2.06643e-251	2.01983	0.527	0.062	4.00887e-247	0.465	up
CBFB	4.0321e-251	1.53225	0.779	0.185	7.82227e-247	0.594	up
FGGY	5.56462e-251	1.93593	0.635	0.111	1.07954e-246	0.524	up
EGR1	6.38667e-251	2.59873	0.558	0.084	1.23901e-246	0.474	up
CEP95	7.79974e-251	1.95477	0.513	0.056	1.51315e-246	0.457	up
ERC1	9.108e-251	2.18996	0.67	0.133	1.76695e-246	0.537	up
NAA16	1.40718e-250	1.87701	0.513	0.056	2.72993e-246	0.457	up
SBNO1	1.44829e-250	1.51115	0.588	0.085	2.80967e-246	0.503	up
ARHGEF26	1.6774e-250	2.28881	0.522	0.062	3.25415e-246	0.46	up
CERT1	1.76959e-250	1.50297	0.814	0.201	3.43301e-246	0.613	up
TM4SF1	2.92047e-250	2.94944	0.514	0.063	5.66572e-246	0.451	up
BTG3	3.88935e-250	2.9697	0.396	0.016	7.54533e-246	0.38	up
ANKRD28	3.8988e-250	1.56684	0.615	0.097	7.56367e-246	0.518	up
ITFG1	4.05419e-250	1.35294	0.699	0.133	7.86513e-246	0.566	up
CBL	8.45922e-250	1.66994	0.846	0.236	1.64109e-245	0.61	up
N4BP2	8.64653e-250	1.49705	0.765	0.171	1.67743e-245	0.594	up
TMEM268	8.80433e-250	3.02168	0.395	0.016	1.70804e-245	0.379	up
PDCD6IP	2.14322e-249	1.51204	0.788	0.189	4.15785e-245	0.599	up
TESK2	2.74805e-249	1.67465	0.673	0.129	5.33123e-245	0.544	up
NAV2	4.18824e-249	1.55301	0.613	0.096	8.12519e-245	0.517	up
MYLIP	5.2839e-249	2.39376	0.564	0.082	1.02508e-244	0.482	up
FAF1	1.04905e-248	1.90049	0.927	0.356	2.03516e-244	0.571	up
FCHO2	1.78244e-248	1.95023	0.53	0.065	3.45793e-244	0.465	up
PPP6R3	1.85886e-248	1.55643	0.773	0.182	3.60619e-244	0.591	up
RBBP8	2.19746e-248	1.60965	0.749	0.169	4.26307e-244	0.58	up
GAPVD1	2.78964e-248	1.38064	0.639	0.107	5.4119e-244	0.532	up
RNF138	2.96327e-248	2.35892	0.451	0.035	5.74874e-244	0.416	up
SLC43A1	3.07175e-248	1.5102	0.675	0.125	5.95919e-244	0.55	up
KIAA2026	3.90797e-248	1.87823	0.554	0.074	7.58146e-244	0.48	up
RHOT1	4.38775e-248	1.76751	0.57	0.08	8.51224e-244	0.49	up
RLF	4.64403e-248	1.63404	0.605	0.095	9.00943e-244	0.51	up
VAMP7	1.14047e-247	2.84316	0.424	0.027	2.21251e-243	0.397	up
DHRS3	1.59004e-247	2.06051	0.488	0.049	3.08469e-243	0.439	up
PPP3R1	2.32498e-247	1.52034	0.701	0.141	4.51047e-243	0.56	up
FAM193A	4.46985e-247	1.79608	0.51	0.056	8.6715e-243	0.454	up
EFNA5	6.29696e-247	2.06605	0.911	0.351	1.22161e-242	0.56	up
PRRG4	8.72997e-247	2.11475	0.479	0.046	1.69361e-242	0.433	up
ANKIB1	1.18055e-246	1.70648	0.648	0.119	2.29026e-242	0.529	up
SETX	1.37332e-246	1.72874	0.527	0.063	2.66425e-242	0.464	up
TMEM131	1.87189e-246	1.36244	0.701	0.137	3.63146e-242	0.564	up
SLC25A30	2.24903e-246	2.16758	0.487	0.05	4.36312e-242	0.437	up
FAT1	2.39019e-246	1.72906	0.782	0.198	4.63696e-242	0.584	up
EGFR	5.36327e-246	2.02927	0.901	0.314	1.04047e-241	0.587	up
SRSF11	5.98473e-246	1.47295	0.827	0.223	1.16104e-241	0.604	up
SNTB2	1.27582e-245	1.59401	0.652	0.12	2.47509e-241	0.532	up
FIG4	1.89347e-245	1.7815	0.52	0.061	3.67333e-241	0.459	up
UBR2	1.93716e-245	1.81174	0.537	0.068	3.7581e-241	0.469	up
DCP1A	2.01276e-245	1.7494	0.541	0.07	3.90475e-241	0.471	up
AGO1	2.27848e-245	1.82684	0.54	0.07	4.42025e-241	0.47	up
BLZF1	2.33667e-245	2.0228	0.461	0.039	4.53314e-241	0.422	up
OTUD7B	3.51654e-245	1.66034	0.658	0.123	6.82209e-241	0.535	up
ENSBTAG00000039662	4.0575e-245	1.75245	0.579	0.085	7.87155e-241	0.494	up
BDH2	8.45157e-245	5.53857	0.336	0.001	1.6396e-240	0.335	up
ZFAND3	8.93387e-245	1.61221	0.947	0.367	1.73317e-240	0.58	up
VPS37B	9.58071e-245	1.64821	0.584	0.089	1.85866e-240	0.495	up
CAPZB	1.26254e-244	1.46651	0.745	0.167	2.44933e-240	0.578	up
MAPK8	1.79022e-244	1.65221	0.548	0.072	3.47303e-240	0.476	up
STAU1	2.65191e-244	1.32259	0.668	0.123	5.14471e-240	0.545	up
CAST	3.03436e-244	1.51671	0.745	0.166	5.88666e-240	0.579	up
CPQ	3.34954e-244	2.07505	0.495	0.053	6.49811e-240	0.442	up
ARHGEF5	5.24217e-244	2.30305	0.446	0.035	1.01698e-239	0.411	up
ZC3HAV1	1.22907e-243	4.30375	0.367	0.011	2.3844e-239	0.356	up
WWC2	2.54714e-243	1.83322	0.647	0.122	4.94145e-239	0.525	up
TNIK	3.63187e-243	1.93103	0.509	0.058	7.04583e-239	0.451	up
IL17RC	5.44343e-243	1.84825	0.521	0.063	1.05603e-238	0.458	up
ARHGAP12	6.00106e-243	1.33366	0.678	0.127	1.16421e-238	0.551	up
ELL	6.47694e-243	2.31932	0.44	0.034	1.25653e-238	0.406	up
EXOC4	7.50541e-243	1.64413	0.811	0.216	1.45605e-238	0.595	up
GAREM1	7.85691e-243	1.78571	0.756	0.184	1.52424e-238	0.572	up
RHOBTB2	1.0976e-242	1.95959	0.488	0.051	2.12935e-238	0.437	up
RBM5	2.01936e-242	1.34483	0.697	0.138	3.91756e-238	0.559	up
BHLHE40	2.52982e-242	2.94907	0.431	0.033	4.90785e-238	0.398	up
CTDSP2	2.76628e-242	1.54692	0.612	0.101	5.36659e-238	0.511	up
FBXO38	2.88407e-242	1.82279	0.515	0.061	5.5951e-238	0.454	up
AMBRA1	3.5324e-242	1.69087	0.57	0.084	6.85286e-238	0.486	up
PEX14	3.98079e-242	1.54937	0.609	0.1	7.72273e-238	0.509	up
ENSBTAG00000030499	6.68324e-242	1.42383	0.703	0.143	1.29655e-237	0.56	up
RASSF3	7.22194e-242	1.7198	0.813	0.224	1.40106e-237	0.589	up
LSR	8.75168e-242	1.53276	0.599	0.097	1.69783e-237	0.502	up
AKAP13	9.43072e-242	2.06083	0.946	0.387	1.82956e-237	0.559	up
CLDND1	2.07365e-241	1.89105	0.501	0.057	4.02288e-237	0.444	up
MYSM1	2.2079e-241	1.83177	0.521	0.063	4.28332e-237	0.458	up
NEMF	2.352e-241	1.35314	0.633	0.109	4.56288e-237	0.524	up
TNFRSF10D	2.62192e-241	4.35817	0.357	0.008	5.08653e-237	0.349	up
INTS6	3.04679e-241	1.93119	0.598	0.098	5.91077e-237	0.5	up
GRHL2	3.08142e-241	2.1707	0.487	0.052	5.97796e-237	0.435	up
MAPKAP1	3.17954e-241	1.62078	0.733	0.168	6.1683e-237	0.565	up
EFNB1	3.40569e-241	1.76266	0.554	0.079	6.60704e-237	0.475	up
MARCHF6	3.8968e-241	1.73275	0.519	0.063	7.55979e-237	0.456	up
RHOBTB3	4.264e-241	1.71964	0.803	0.214	8.27216e-237	0.589	up
MED25	4.97967e-241	1.77602	0.555	0.078	9.66055e-237	0.477	up
CAMK2D	5.00337e-241	2.02138	0.581	0.092	9.70654e-237	0.489	up
SPTLC2	6.51152e-241	1.43765	0.643	0.115	1.26324e-236	0.528	up
DCAF12	7.40343e-241	1.70718	0.551	0.077	1.43627e-236	0.474	up
BFAR	7.80912e-241	1.49913	0.598	0.095	1.51497e-236	0.503	up
RSF1	1.52742e-240	1.3397	0.713	0.149	2.96319e-236	0.564	up
ETV3	1.62221e-240	2.30252	0.436	0.033	3.1471e-236	0.403	up
TRPC4AP	2.15055e-240	1.55581	0.731	0.165	4.17207e-236	0.566	up
HYCC1	2.64591e-240	1.74582	0.722	0.163	5.13307e-236	0.559	up
UIMC1	3.56775e-240	1.4645	0.664	0.127	6.92143e-236	0.537	up
CRTC3	3.81951e-240	1.96913	0.566	0.086	7.40984e-236	0.48	up
MAP4K4	3.95631e-240	2.27771	0.45	0.038	7.67523e-236	0.412	up
MACROD1	3.99175e-240	1.87752	0.546	0.076	7.74399e-236	0.47	up
LRIG2	4.1321e-240	1.57217	0.519	0.062	8.01628e-236	0.457	up
CD151	4.6461e-240	1.42657	0.773	0.189	9.01343e-236	0.584	up
TLK2	6.33781e-240	1.44441	0.701	0.144	1.22953e-235	0.557	up
MFSD14A	8.17427e-240	1.21497	0.721	0.15	1.58581e-235	0.571	up
AHCYL2	8.92154e-240	3.16679	0.579	0.106	1.73078e-235	0.473	up
TAX1BP1	9.63767e-240	1.48775	0.829	0.24	1.86971e-235	0.589	up
AUH	9.93869e-240	1.55063	0.607	0.1	1.92811e-235	0.507	up
WASHC5	1.0625e-239	1.72988	0.53	0.068	2.06124e-235	0.462	up
SGCE	1.95044e-239	4.79649	0.343	0.005	3.78385e-235	0.338	up
ZNF410	1.97083e-239	1.59456	0.58	0.09	3.8234e-235	0.49	up
SERINC1	2.78397e-239	1.38302	0.551	0.075	5.4009e-235	0.476	up
DPF3	2.95064e-239	1.82737	0.539	0.072	5.72424e-235	0.467	up
RPL23A	4.58465e-239	-1.35202	0.775	0.913	8.89423e-235	-0.138	ns
TUT4	5.16099e-239	1.9979	0.565	0.087	1.00123e-234	0.478	up
HOOK3	6.07071e-239	1.55761	0.599	0.097	1.17772e-234	0.502	up
RPS15	7.59803e-239	-1.36607	0.777	0.964	1.47402e-234	-0.187	down
WASF2	7.93301e-239	1.393	0.78	0.192	1.539e-234	0.588	up
OXR1	1.71872e-238	1.38212	0.626	0.107	3.33431e-234	0.519	up
GNA13	2.30268e-238	2.21545	0.484	0.053	4.46719e-234	0.431	up
GALNT3	2.36097e-238	1.57688	0.537	0.071	4.58027e-234	0.466	up
RPLP2	3.95535e-238	-1.23295	0.814	0.988	7.67338e-234	-0.174	down
CTNNB1	4.11834e-238	1.73417	0.923	0.388	7.98958e-234	0.535	up
ENSBTAG00000049842	5.14399e-238	1.53523	0.645	0.119	9.97934e-234	0.526	up
BABAM2	6.17817e-238	1.53461	0.666	0.13	1.19856e-233	0.536	up
DDB1	6.35321e-238	1.60279	0.845	0.263	1.23252e-233	0.582	up
EIF4G3	8.96814e-238	1.71907	0.625	0.113	1.73982e-233	0.512	up
FOXP1	8.99184e-238	1.94279	0.537	0.075	1.74442e-233	0.462	up
CRLF3	1.17678e-237	2.59397	0.411	0.027	2.28295e-233	0.384	up
ABTB2	1.5968e-237	3.67387	0.445	0.042	3.0978e-233	0.403	up
LEPROT	1.77384e-237	1.48917	0.586	0.092	3.44125e-233	0.494	up
CDC42BPB	1.94238e-237	1.52196	0.689	0.142	3.76821e-233	0.547	up
NCKAP1	2.25378e-237	1.40944	0.658	0.124	4.37233e-233	0.534	up
ZNF131	2.30331e-237	1.78993	0.505	0.06	4.46843e-233	0.445	up
RPL36	2.75465e-237	-1.58588	0.769	0.944	5.34403e-233	-0.175	down
EPC1	2.77584e-237	1.73827	0.56	0.082	5.38514e-233	0.478	up
ENSBTAG00000048798	3.01947e-237	1.48819	0.711	0.153	5.85776e-233	0.558	up
ECPAS	3.62385e-237	1.30754	0.761	0.175	7.03028e-233	0.586	up
FNDC3A	4.22324e-237	1.52094	0.883	0.271	8.19309e-233	0.612	up
IGFBP5	5.34598e-237	2.96872	0.385	0.018	1.03712e-232	0.367	up
MON2	5.59439e-237	1.53683	0.538	0.071	1.08531e-232	0.467	up
KIAA1217	6.41187e-237	1.59349	0.804	0.216	1.2439e-232	0.588	up
MTCH1	7.13283e-237	1.46822	0.672	0.134	1.38377e-232	0.538	up
PARD3	8.56962e-237	1.82363	0.937	0.356	1.66251e-232	0.581	up
KCMF1	9.27324e-237	1.42502	0.781	0.196	1.79901e-232	0.585	up
RBM33	1.14188e-236	1.4216	0.636	0.115	2.21524e-232	0.521	up
BOD1L1	1.39262e-236	1.31759	0.606	0.099	2.70167e-232	0.507	up
EEPD1	1.47627e-236	2.98489	0.421	0.031	2.86395e-232	0.39	up
LRP5	1.97901e-236	1.72906	0.504	0.059	3.83928e-232	0.445	up
ZNF148	2.04429e-236	1.51412	0.591	0.095	3.96592e-232	0.496	up
ORC4	2.35733e-236	1.57031	0.629	0.113	4.57322e-232	0.516	up
TTC7B	3.12079e-236	1.82091	0.603	0.103	6.05433e-232	0.5	up
QKI	3.86543e-236	1.54975	0.653	0.125	7.49894e-232	0.528	up
EEA1	4.28021e-236	1.47071	0.696	0.144	8.3036e-232	0.552	up
PPP1R9A	4.82994e-236	1.63564	0.877	0.281	9.37009e-232	0.596	up
MGST3	5.26495e-236	3.15644	0.365	0.012	1.0214e-231	0.353	up
YTHDC1	5.56022e-236	1.3217	0.734	0.164	1.07868e-231	0.57	up
B3GNT5	7.34773e-236	1.51888	0.749	0.175	1.42546e-231	0.574	up
ENSBTAG00000053703	8.77856e-236	2.21386	0.449	0.04	1.70304e-231	0.409	up
TRPM4	9.29226e-236	3.10636	0.39	0.021	1.8027e-231	0.369	up
VPS13C	9.9514e-236	1.45018	0.552	0.078	1.93057e-231	0.474	up
CDKL5	1.05016e-235	1.99837	0.601	0.106	2.0373e-231	0.495	up
RBBP6	1.55453e-235	1.54907	0.739	0.173	3.01578e-231	0.566	up
MCL1	1.78699e-235	1.61739	0.683	0.149	3.46676e-231	0.534	up
SMG1	2.67744e-235	1.24895	0.729	0.157	5.19424e-231	0.572	up
PRKCE	3.22623e-235	2.63118	0.547	0.085	6.25888e-231	0.462	up
HEBP1	3.43935e-235	2.25038	0.73	0.206	6.67234e-231	0.524	up
TET2	3.80754e-235	1.62546	0.526	0.068	7.38663e-231	0.458	up
EPS15	4.42397e-235	1.5277	0.587	0.094	8.58251e-231	0.493	up
CDC42BPG	5.57028e-235	2.36564	0.43	0.034	1.08063e-230	0.396	up
TANK	1.72814e-234	2.01426	0.526	0.072	3.3526e-230	0.454	up
NUP153	3.10306e-234	1.37474	0.663	0.128	6.01994e-230	0.535	up
TMEM87A	3.27228e-234	1.58605	0.481	0.051	6.34822e-230	0.43	up
RPS6KA6	3.31113e-234	2.05556	0.537	0.077	6.4236e-230	0.46	up
CAPG	3.51995e-234	-1.92996	0.429	0.825	6.82871e-230	-0.396	down
RBPJ	4.5586e-234	1.64012	0.858	0.26	8.84369e-230	0.598	up
ERRFI1	4.80719e-234	2.3186	0.554	0.086	9.32595e-230	0.468	up
MAP3K2	6.08345e-234	2.17899	0.429	0.033	1.18019e-229	0.396	up
RBMS2	9.17237e-234	2.91626	0.393	0.022	1.77944e-229	0.371	up
AVL9	1.18073e-233	2.52829	0.414	0.029	2.29062e-229	0.385	up
COX2	1.27343e-233	-1.22613	0.817	1	2.47046e-229	-0.183	down
ENSBTAG00000005997	1.4463e-233	1.7759	0.499	0.058	2.80583e-229	0.441	up
WWOX	1.53254e-233	1.48485	0.803	0.215	2.97312e-229	0.588	up
CDCP1	1.54154e-233	2.05254	0.474	0.05	2.99058e-229	0.424	up
TRMT13	2.38075e-233	1.56668	0.507	0.061	4.61865e-229	0.446	up
ETV6	2.80614e-233	1.90619	0.536	0.076	5.44392e-229	0.46	up
ENO1	3.04692e-233	-1.47692	0.725	0.895	5.91102e-229	-0.17	down
CHD2	4.00361e-233	1.66391	0.495	0.058	7.76701e-229	0.437	up
MROH1	5.03584e-233	2.02769	0.468	0.048	9.76954e-229	0.42	up
FADS1	6.00706e-233	-2.28475	0.517	0.793	1.16537e-228	-0.276	down
RALGAPA1	1.20671e-232	1.79869	0.547	0.08	2.34101e-228	0.467	up
NF1	1.74658e-232	2.06603	0.524	0.072	3.38837e-228	0.452	up
UBAP2	1.87394e-232	1.56493	0.853	0.257	3.63545e-228	0.596	up
SREK1	2.16435e-232	1.46123	0.724	0.164	4.19884e-228	0.56	up
TNS1	2.54225e-232	3.57182	0.369	0.015	4.93196e-228	0.354	up
CTNNA1	3.01893e-232	1.63371	0.946	0.428	5.85673e-228	0.518	up
FAAH	3.17839e-232	2.78347	0.413	0.03	6.16607e-228	0.383	up
GRB7	6.48613e-232	2.5671	0.433	0.037	1.25831e-227	0.396	up
KIF27	6.95874e-232	2.36767	0.439	0.038	1.35e-227	0.401	up
KDM4C	1.08163e-231	1.4844	0.727	0.165	2.09836e-227	0.562	up
APC	1.41717e-231	1.2914	0.621	0.109	2.74931e-227	0.512	up
MYO6	2.45143e-231	1.63636	0.805	0.216	4.75578e-227	0.589	up
TUFT1	2.51543e-231	1.74263	0.667	0.143	4.87994e-227	0.524	up
PHTF2	3.72718e-231	1.56125	0.632	0.118	7.23074e-227	0.514	up
HELZ	3.82505e-231	1.50622	0.839	0.243	7.42059e-227	0.596	up
CPEB2	3.98243e-231	2.07213	0.528	0.074	7.72591e-227	0.454	up
CDH1	4.17829e-231	1.55499	0.901	0.346	8.10588e-227	0.555	up
LGR4	7.28723e-231	1.41044	0.741	0.173	1.41372e-226	0.568	up
PSD3	8.43813e-231	1.57747	0.878	0.276	1.637e-226	0.602	up
CCSER1	1.11191e-230	1.67776	0.798	0.218	2.1571e-226	0.58	up
TRAK2	1.19398e-230	2.85853	0.386	0.021	2.31632e-226	0.365	up
TMEM245	1.22262e-230	2.22153	0.459	0.047	2.37189e-226	0.412	up
BPTF	1.24131e-230	1.21892	0.761	0.178	2.40815e-226	0.583	up
SNX9	1.28635e-230	1.55877	0.747	0.179	2.49552e-226	0.568	up
BMP7	2.90774e-230	1.96801	0.437	0.037	5.64102e-226	0.4	up
EXT2	6.86808e-230	1.20458	0.637	0.116	1.33241e-225	0.521	up
MFSD6	8.09929e-230	1.9799	0.481	0.055	1.57126e-225	0.426	up
KLHDC10	9.91914e-230	1.77161	0.535	0.076	1.92431e-225	0.459	up
NUCB1	1.06208e-229	1.43035	0.55	0.08	2.06043e-225	0.47	up
VPS53	1.88482e-229	1.50779	0.571	0.09	3.65655e-225	0.481	up
TPK1	3.45591e-229	1.59678	0.79	0.214	6.70446e-225	0.576	up
SLC9A2	3.88824e-229	3.73323	0.358	0.013	7.54318e-225	0.345	up
HIPK1	4.639e-229	1.59956	0.526	0.071	8.99965e-225	0.455	up
PPP1R13B	1.07032e-228	2.46519	0.425	0.035	2.07642e-224	0.39	up
CLCN7	1.37275e-228	2.27007	0.438	0.04	2.66313e-224	0.398	up
ATP11B	1.60373e-228	1.34296	0.613	0.108	3.11123e-224	0.505	up
SFXN1	2.1402e-228	2.84609	0.377	0.019	4.15199e-224	0.358	up
RPL35	2.44247e-228	-1.23732	0.797	0.981	4.73838e-224	-0.184	down
EPB41L4A	2.63153e-228	1.64127	0.873	0.284	5.10516e-224	0.589	up
YTHDF2	2.82985e-228	1.60897	0.472	0.05	5.4899e-224	0.422	up
MIER1	4.3756e-228	1.2921	0.661	0.13	8.48866e-224	0.531	up
CCM2	5.56749e-228	1.43897	0.673	0.142	1.08009e-223	0.531	up
PCF11	8.84339e-228	1.53411	0.591	0.1	1.71562e-223	0.491	up
LIN52	1.31212e-227	1.7585	0.529	0.074	2.54552e-223	0.455	up
PIP5K1B	1.39955e-227	3.23678	0.436	0.043	2.71512e-223	0.393	up
MAN2A1	1.42983e-227	1.49889	0.837	0.239	2.77386e-223	0.598	up
RASA1	1.68034e-227	1.52225	0.863	0.266	3.25986e-223	0.597	up
RPL38	1.75182e-227	-1.48446	0.758	0.933	3.39854e-223	-0.175	down
TBC1D22A	2.01382e-227	1.32362	0.657	0.129	3.90681e-223	0.528	up
PARD3B	3.12652e-227	1.631	0.801	0.231	6.06545e-223	0.57	up
ITSN2	5.84153e-227	1.47208	0.523	0.071	1.13326e-222	0.452	up
SQSTM1	8.56929e-227	2.11617	0.649	0.141	1.66244e-222	0.508	up
CYP2D14	9.53289e-227	2.60713	0.405	0.029	1.84938e-222	0.376	up
CGN	9.82228e-227	1.6067	0.566	0.091	1.90552e-222	0.475	up
CFLAR	1.33532e-226	1.83826	0.451	0.045	2.59052e-222	0.406	up
ARHGAP5	1.90724e-226	1.3149	0.782	0.198	3.70005e-222	0.584	up
NAB1	2.33363e-226	1.39761	0.511	0.066	4.52725e-222	0.445	up
SLC11A2	2.3749e-226	1.54453	0.627	0.118	4.60731e-222	0.509	up
ERP44	2.50974e-226	1.27686	0.672	0.137	4.8689e-222	0.535	up
KCNK1	3.76982e-226	1.33605	0.603	0.106	7.31345e-222	0.497	up
GOLPH3	4.33966e-226	1.47794	0.818	0.238	8.41895e-222	0.58	up
SMC5	5.5017e-226	1.26053	0.601	0.103	1.06733e-221	0.498	up
GCLC	6.51343e-226	2.20227	0.535	0.082	1.26361e-221	0.453	up
RANBP9	6.64432e-226	1.92412	0.443	0.042	1.289e-221	0.401	up
UBASH3B	7.14273e-226	1.80135	0.819	0.241	1.38569e-221	0.578	up
WDR37	9.13207e-226	2.01973	0.44	0.041	1.77162e-221	0.399	up
ARL8B	1.58133e-225	1.75384	0.52	0.073	3.06777e-221	0.447	up
WDR26	1.98605e-225	1.74846	0.501	0.064	3.85294e-221	0.437	up
RAB18	2.21352e-225	1.34159	0.745	0.181	4.29423e-221	0.564	up
CITED1	2.97851e-225	2.27915	0.661	0.18	5.77831e-221	0.481	up
MYCBP2	3.58869e-225	1.4471	0.831	0.235	6.96206e-221	0.596	up
MAFG	4.55327e-225	1.98325	0.435	0.04	8.83334e-221	0.395	up
ENSBTAG00000049812	4.57359e-225	2.48272	0.443	0.045	8.87277e-221	0.398	up
CLDN7	5.29796e-225	2.65474	0.387	0.024	1.0278e-220	0.363	up
PPM1A	5.68633e-225	1.2974	0.613	0.11	1.10315e-220	0.503	up
ATF7	7.36116e-225	1.44763	0.589	0.1	1.42807e-220	0.489	up
PICALM	7.91228e-225	1.54137	0.774	0.205	1.53498e-220	0.569	up
VKORC1L1	8.53562e-225	1.29389	0.613	0.11	1.65591e-220	0.503	up
PAXBP1	1.73777e-224	1.37537	0.619	0.114	3.37127e-220	0.505	up
MPZL3	3.61449e-224	2.71851	0.377	0.021	7.01211e-220	0.356	up
USP6NL	4.04368e-224	1.38476	0.549	0.082	7.84474e-220	0.467	up
MKLN1	5.48314e-224	1.18442	0.653	0.127	1.06373e-219	0.526	up
MFSD1	5.84467e-224	1.26613	0.493	0.06	1.13387e-219	0.433	up
OCLN	6.59334e-224	1.54427	0.555	0.087	1.27911e-219	0.468	up
ND2	1.10449e-223	-1.42373	0.781	0.99	2.14271e-219	-0.209	down
PFN1	1.21347e-223	-1.47933	0.771	0.977	2.35413e-219	-0.206	down
PRDM2	1.81286e-223	1.36344	0.633	0.12	3.51695e-219	0.513	up
KCTD9	2.07994e-223	2.17688	0.433	0.04	4.03508e-219	0.393	up
RAPGEF1	2.239e-223	1.59395	0.546	0.084	4.34366e-219	0.462	up
DUSP16	2.39166e-223	2.69705	0.395	0.027	4.63983e-219	0.368	up
STK26	3.01511e-223	2.19189	0.447	0.045	5.84931e-219	0.402	up
MFSD14B	3.32561e-223	1.36392	0.573	0.094	6.45168e-219	0.479	up
NCOA6	3.35677e-223	1.34835	0.761	0.189	6.51213e-219	0.572	up
PARP12	3.697e-223	3.24943	0.346	0.011	7.17218e-219	0.335	up
LARP4B	6.30349e-223	1.48796	0.514	0.07	1.22288e-218	0.444	up
NUDT4	1.03161e-222	1.85022	0.489	0.061	2.00133e-218	0.428	up
SIAH1	1.35382e-222	2.57702	0.385	0.024	2.6264e-218	0.361	up
DOCK1	1.53911e-222	1.78568	0.941	0.4	2.98588e-218	0.541	up
FAM234A	2.31164e-222	1.53636	0.508	0.069	4.48459e-218	0.439	up
CNOT4	2.41958e-222	1.13992	0.686	0.144	4.69398e-218	0.542	up
RHEB	3.54248e-222	1.45314	0.541	0.081	6.87242e-218	0.46	up
TBL1XR1	4.86843e-222	1.28081	0.816	0.22	9.44475e-218	0.596	up
ZBTB11	9.15522e-222	1.93995	0.415	0.034	1.77611e-217	0.381	up
RCOR3	9.40323e-222	2.50289	0.391	0.026	1.82423e-217	0.365	up
IFIH1	1.06183e-221	5.68716	0.307	0.001	2.05995e-217	0.306	up
MLLT10	1.233e-221	1.40438	0.866	0.27	2.39201e-217	0.596	up
XRN1	1.5225e-221	1.21428	0.616	0.113	2.95365e-217	0.503	up
MAU2	1.68817e-221	2.1627	0.397	0.028	3.27506e-217	0.369	up
ABHD12	2.38013e-221	1.32696	0.699	0.159	4.61745e-217	0.54	up
TOM1L2	2.41879e-221	2.11587	0.481	0.061	4.69246e-217	0.42	up
LRCH1	2.62912e-221	1.37508	0.793	0.213	5.10048e-217	0.58	up
VEZT	2.99941e-221	1.59445	0.511	0.07	5.81886e-217	0.441	up
TBC1D15	4.13004e-221	2.05772	0.443	0.045	8.01228e-217	0.398	up
HNRNPLL	5.66558e-221	1.40005	0.791	0.21	1.09912e-216	0.581	up
ATAD2B	9.41453e-221	1.23992	0.586	0.1	1.82642e-216	0.486	up
ELMO2	1.22939e-220	2.19775	0.419	0.036	2.38501e-216	0.383	up
C3H1orf146	1.36193e-220	2.94523	0.359	0.016	2.64214e-216	0.343	up
IPMK	1.37015e-220	2.1641	0.461	0.052	2.6581e-216	0.409	up
PPP4R3A	1.54009e-220	1.22471	0.649	0.128	2.98778e-216	0.521	up
GTF2B	1.89441e-220	1.72282	0.596	0.112	3.67516e-216	0.484	up
WDFY1	2.22977e-220	1.9276	0.485	0.062	4.32575e-216	0.423	up
DGKA	2.2556e-220	1.84582	0.485	0.061	4.37586e-216	0.424	up
KPNA1	2.60707e-220	1.54654	0.557	0.09	5.05771e-216	0.467	up
DYM	2.7114e-220	1.63492	0.783	0.211	5.26012e-216	0.572	up
PHF21A	3.19626e-220	1.97542	0.491	0.064	6.20075e-216	0.427	up
SS18	4.05345e-220	1.45795	0.663	0.139	7.8637e-216	0.524	up
LENG8	4.3197e-220	1.88463	0.465	0.054	8.38021e-216	0.411	up
SERPINE2	6.34984e-220	2.45764	0.474	0.06	1.23187e-215	0.414	up
BRWD3	7.37885e-220	1.76749	0.493	0.064	1.4315e-215	0.429	up
ODC1	8.93316e-220	-1.78386	0.483	0.843	1.73303e-215	-0.36	down
ARL15	1.0207e-219	4.57255	0.326	0.007	1.98016e-215	0.319	up
ARPC1B	1.2415e-219	1.38782	0.586	0.102	2.4085e-215	0.484	up
FBXO42	1.58194e-219	1.83978	0.444	0.045	3.06897e-215	0.399	up
SHISA5	1.69079e-219	1.56156	0.737	0.207	3.28012e-215	0.53	up
BCL2L13	4.149e-219	1.35627	0.605	0.111	8.04906e-215	0.494	up
PNN	4.96543e-219	1.33103	0.799	0.225	9.63293e-215	0.574	up
ANKRD17	5.23163e-219	1.32869	0.857	0.256	1.01494e-214	0.601	up
ABTB1	6.32336e-219	1.42613	0.747	0.185	1.22673e-214	0.562	up
SLC39A8	8.03736e-219	3.47461	0.387	0.028	1.55925e-214	0.359	up
ADGRG1	1.05257e-218	3.08427	0.359	0.017	2.04199e-214	0.342	up
ATP8B1	1.21591e-218	1.30817	0.687	0.15	2.35886e-214	0.537	up
ZNF292	1.44806e-218	1.1804	0.673	0.141	2.80923e-214	0.532	up
PUM1	1.58925e-218	1.47111	0.902	0.327	3.08315e-214	0.575	up
RNF19A	1.98733e-218	1.79115	0.47	0.056	3.85543e-214	0.414	up
JAK1	2.60174e-218	1.51954	0.555	0.09	5.04738e-214	0.465	up
TBC1D5	3.43491e-218	1.46284	0.736	0.183	6.66373e-214	0.553	up
SARAF	4.77689e-218	1.61042	0.512	0.073	9.26716e-214	0.439	up
ACER3	5.18136e-218	1.78138	0.603	0.117	1.00518e-213	0.486	up
SOS2	5.36484e-218	1.83134	0.484	0.062	1.04078e-213	0.422	up
TJP3	5.47354e-218	1.33476	0.599	0.109	1.06187e-213	0.49	up
TRANK1	5.76394e-218	1.46059	0.617	0.119	1.1182e-213	0.498	up
SNX10	9.25245e-218	1.59918	0.697	0.171	1.79498e-213	0.526	up
MAML1	1.03805e-217	2.44773	0.383	0.025	2.01383e-213	0.358	up
KIDINS220	1.12776e-217	1.40861	0.751	0.186	2.18786e-213	0.565	up
RBM25	1.1446e-217	1.28733	0.833	0.246	2.22052e-213	0.587	up
RAD51B	1.3334e-217	1.55574	0.79	0.223	2.58679e-213	0.567	up
ATG5	1.60194e-217	1.4841	0.607	0.115	3.10777e-213	0.492	up
SKP2	1.64278e-217	1.32203	0.737	0.182	3.187e-213	0.555	up
STRN	3.2979e-217	1.35776	0.616	0.118	6.39792e-213	0.498	up
SPEN	3.70461e-217	1.08632	0.598	0.105	7.18695e-213	0.493	up
MYO1D	3.94756e-217	1.90617	0.985	0.643	7.65826e-213	0.342	up
NUP98	3.95186e-217	1.28749	0.627	0.121	7.6666e-213	0.506	up
STK24	5.71973e-217	1.33198	0.767	0.2	1.10963e-212	0.567	up
QSER1	6.42438e-217	1.46604	0.544	0.085	1.24633e-212	0.459	up
CDS1	1.11963e-216	2.07295	0.453	0.051	2.17208e-212	0.402	up
PGGT1B	1.15407e-216	1.63292	0.501	0.069	2.2389e-212	0.432	up
ANKRD26	1.64369e-216	1.88671	0.443	0.046	3.18876e-212	0.397	up
SLC39A11	1.95642e-216	1.48455	0.778	0.218	3.79546e-212	0.56	up
OCIAD1	2.16033e-216	1.26962	0.753	0.203	4.19104e-212	0.55	up
NCOA3	3.2044e-216	1.30311	0.728	0.176	6.21653e-212	0.552	up
GRAMD2A	3.38191e-216	4.59626	0.311	0.004	6.5609e-212	0.307	up
FAM169A	3.77866e-216	1.30279	0.66	0.138	7.3306e-212	0.522	up
SLF2	4.17482e-216	1.62383	0.503	0.07	8.09914e-212	0.433	up
NPTN	4.69834e-216	1.31842	0.754	0.198	9.11477e-212	0.556	up
LRRK1	5.28683e-216	2.03282	0.435	0.044	1.02565e-211	0.391	up
DTNBP1	5.39442e-216	1.28269	0.643	0.131	1.04652e-211	0.512	up
GALNT1	7.19069e-216	1.30875	0.724	0.175	1.39499e-211	0.549	up
PDS5A	8.8771e-216	1.19875	0.727	0.171	1.72216e-211	0.556	up
NAA25	9.08548e-216	1.17452	0.603	0.111	1.76258e-211	0.492	up
MFSD11	9.3932e-216	2.01966	0.437	0.045	1.82228e-211	0.392	up
SENP6	9.77223e-216	1.25759	0.857	0.257	1.89581e-211	0.6	up
MARK2	1.24193e-215	1.12236	0.63	0.122	2.40934e-211	0.508	up
CCPG1	1.25244e-215	1.57439	0.413	0.035	2.42974e-211	0.378	up
U2SURP	1.34653e-215	1.12086	0.713	0.161	2.61226e-211	0.552	up
GTF2H1	1.37209e-215	1.09199	0.677	0.143	2.66186e-211	0.534	up
RAB9A	1.41886e-215	1.58296	0.55	0.091	2.75259e-211	0.459	up
KIF13B	2.42724e-215	1.47758	0.874	0.291	4.70884e-211	0.583	up
KAT6A	4.10905e-215	1.17672	0.566	0.093	7.97156e-211	0.473	up
GATAD2A	4.38669e-215	1.27519	0.609	0.114	8.51018e-211	0.495	up
TMEM106B	6.79208e-215	1.46214	0.475	0.059	1.31766e-210	0.416	up
HEXB	6.83405e-215	1.40294	0.478	0.059	1.32581e-210	0.419	up
NBN	6.91115e-215	1.27232	0.487	0.062	1.34076e-210	0.425	up
SLC37A3	7.31798e-215	1.05976	0.609	0.113	1.41969e-210	0.496	up
BTBD9	1.01252e-214	1.28352	0.832	0.244	1.96429e-210	0.588	up
DCUN1D1	1.15311e-214	1.90924	0.423	0.04	2.23702e-210	0.383	up
RIGI	1.50895e-214	4.13864	0.317	0.006	2.92736e-210	0.311	up
PARG	1.84411e-214	1.39975	0.618	0.122	3.57757e-210	0.496	up
KMT5B	2.20496e-214	1.56749	0.486	0.063	4.27763e-210	0.423	up
PIK3C2G	3.54348e-214	4.22902	0.353	0.018	6.87435e-210	0.335	up
ERN1	6.44836e-214	1.54	0.513	0.075	1.25098e-209	0.438	up
STXBP3	6.64911e-214	1.47686	0.503	0.07	1.28993e-209	0.433	up
SRSF4	6.88546e-214	1.21903	0.611	0.115	1.33578e-209	0.496	up
IPCEF1	6.91355e-214	4.4028	0.328	0.01	1.34123e-209	0.318	up
ATP6AP2	8.85695e-214	1.34824	0.681	0.159	1.71825e-209	0.522	up
CCNL2	1.10697e-213	1.26261	0.527	0.079	2.14752e-209	0.448	up
FARP1	1.15199e-213	1.42266	0.783	0.213	2.23485e-209	0.57	up
DGKD	1.17227e-213	1.38712	0.846	0.263	2.2742e-209	0.583	up
CDK8	1.17326e-213	1.59024	0.573	0.102	2.27613e-209	0.471	up
KCTD3	1.5951e-213	1.43844	0.661	0.145	3.09449e-209	0.516	up
SMG6	1.80127e-213	1.68501	0.493	0.068	3.49446e-209	0.425	up
PXK	2.64197e-213	1.92927	0.44	0.047	5.12541e-209	0.393	up
CSNK1G1	2.65303e-213	1.15063	0.659	0.138	5.14688e-209	0.521	up
LPCAT4	3.07346e-213	2.37794	0.433	0.046	5.96252e-209	0.387	up
TRAPPC10	3.49814e-213	1.17672	0.643	0.131	6.78639e-209	0.512	up
SLC25A25	4.79722e-213	2.29685	0.39	0.029	9.30661e-209	0.361	up
ENSBTAG00000054239	5.96262e-213	1.54294	0.521	0.079	1.15675e-208	0.442	up
TRPM7	6.22263e-213	1.13173	0.621	0.119	1.20719e-208	0.502	up
OTUD4	6.33419e-213	1.34561	0.594	0.109	1.22883e-208	0.485	up
PPIF	6.75264e-213	2.13021	0.501	0.073	1.31001e-208	0.428	up
FOXO3	7.04815e-213	1.73273	0.571	0.102	1.36734e-208	0.469	up
ABR	7.23537e-213	1.48941	0.777	0.214	1.40366e-208	0.563	up
WEE1	7.27793e-213	1.35649	0.635	0.13	1.41192e-208	0.505	up
TBC1D12	7.29727e-213	1.63745	0.491	0.067	1.41567e-208	0.424	up
SMCHD1	7.38191e-213	1.27445	0.793	0.217	1.43209e-208	0.576	up
AGAP1	9.29777e-213	1.76656	0.694	0.166	1.80377e-208	0.528	up
ATP13A3	1.30168e-212	1.62029	0.565	0.098	2.52525e-208	0.467	up
RNPC3	1.72356e-212	1.98781	0.426	0.042	3.34371e-208	0.384	up
MBTD1	2.21774e-212	1.89737	0.441	0.048	4.30242e-208	0.393	up
ND1	2.41392e-212	-1.55919	0.788	0.987	4.683e-208	-0.199	down
PIAS1	4.27951e-212	1.31534	0.585	0.106	8.30225e-208	0.479	up
RAB7A	4.9125e-212	1.55273	0.653	0.148	9.53024e-208	0.505	up
GMCL1	9.27944e-212	1.70829	0.483	0.064	1.80021e-207	0.419	up
LNPK	1.64805e-211	1.36862	0.557	0.094	3.19723e-207	0.463	up
BAIAP2L1	1.67974e-211	1.37402	0.937	0.401	3.25871e-207	0.536	up
FNDC3B	1.73114e-211	1.75342	0.962	0.456	3.35842e-207	0.506	up
BCLAF1	2.60759e-211	1.17404	0.732	0.178	5.05872e-207	0.554	up
SEC24D	4.41878e-211	1.27942	0.725	0.179	8.57243e-207	0.546	up
BMP2K	4.44322e-211	2.10276	0.543	0.095	8.61985e-207	0.448	up
TRAFD1	4.88917e-211	1.34281	0.625	0.126	9.485e-207	0.499	up
MDM4	5.24413e-211	1.71453	0.485	0.066	1.01736e-206	0.419	up
MGRN1	5.75692e-211	1.33223	0.608	0.117	1.11684e-206	0.491	up
SPIRE1	6.76215e-211	2.92032	0.363	0.022	1.31186e-206	0.341	up
IL17RD	9.6895e-211	3.4535	0.348	0.017	1.87976e-206	0.331	up
ARF4	1.1619e-210	1.29946	0.64	0.132	2.25409e-206	0.508	up
VCL	1.21962e-210	1.68813	0.92	0.379	2.36606e-206	0.541	up
HSPB1	1.34818e-210	-1.25931	0.807	0.967	2.61546e-206	-0.16	down
FAM21A	1.55015e-210	1.06776	0.659	0.138	3.00729e-206	0.521	up
CREBBP	1.76893e-210	1.04495	0.582	0.102	3.43173e-206	0.48	up
STX6	1.99177e-210	1.27707	0.515	0.076	3.86404e-206	0.439	up
TAF15	2.92368e-210	1.13529	0.611	0.116	5.67194e-206	0.495	up
ATP6V0A4	3.29761e-210	2.10476	0.455	0.057	6.39737e-206	0.398	up
KLHL22	3.86427e-210	2.25387	0.375	0.025	7.49668e-206	0.35	up
RESTB	4.02837e-210	1.18001	0.701	0.162	7.81503e-206	0.539	up
ARMH3	4.16791e-210	1.53258	0.556	0.096	8.08575e-206	0.46	up
TBC1D9B	4.3305e-210	1.31345	0.58	0.105	8.40118e-206	0.475	up
GALNT7	4.63015e-210	1.23334	0.559	0.095	8.98249e-206	0.464	up
ENSBTAG00000054797	4.91211e-210	1.138	0.702	0.161	9.52949e-206	0.541	up
TBC1D9	8.87642e-210	1.67619	0.563	0.101	1.72203e-205	0.462	up
ATF1	9.79938e-210	1.40305	0.522	0.081	1.90108e-205	0.441	up
ANKRD42	9.93562e-210	2.43845	0.382	0.028	1.92751e-205	0.354	up
VPS13B	1.29719e-209	1.65115	0.887	0.317	2.51654e-205	0.57	up
TXNDC11	1.36786e-209	1.12128	0.683	0.15	2.65366e-205	0.533	up
RPS29	2.35331e-209	-1.15384	0.806	0.98	4.56542e-205	-0.174	down
GLIPR1	2.36363e-209	1.75843	0.602	0.126	4.58544e-205	0.476	up
SMAD2	2.47372e-209	1.24469	0.617	0.121	4.79902e-205	0.496	up
UTRN	2.62717e-209	1.21516	0.62	0.124	5.0967e-205	0.496	up
OSTF1	3.03908e-209	1.48397	0.888	0.371	5.89581e-205	0.517	up
PARP14	3.08921e-209	4.46349	0.31	0.006	5.99307e-205	0.304	up
CLDN3	3.35815e-209	2.96298	0.344	0.016	6.51481e-205	0.328	up
COQ10B	4.87459e-209	1.62228	0.532	0.088	9.45671e-205	0.444	up
TMC6	5.15977e-209	1.28158	0.525	0.081	1.001e-204	0.444	up
ELF3	7.95207e-209	1.62297	0.733	0.198	1.5427e-204	0.535	up
CHD2.1	8.2652e-209	2.13499	0.417	0.041	1.60345e-204	0.376	up
NFKB1	1.05798e-208	1.7303	0.546	0.095	2.05248e-204	0.451	up
KDM5A	1.19209e-208	1.16778	0.558	0.095	2.31265e-204	0.463	up
SEC24A	1.30112e-208	1.36215	0.698	0.166	2.52418e-204	0.532	up
CLPX	1.33126e-208	1.46864	0.463	0.057	2.58265e-204	0.406	up
RUFY2	2.93948e-208	1.62358	0.439	0.048	5.70259e-204	0.391	up
F3	3.09804e-208	2.11212	0.479	0.068	6.01019e-204	0.411	up
TAOK3	4.11563e-208	1.28116	0.831	0.257	7.98432e-204	0.574	up
PACSIN2	7.24969e-208	1.66427	0.931	0.429	1.40644e-203	0.502	up
C18H16orf87	8.98591e-208	1.41849	0.569	0.104	1.74327e-203	0.465	up
USP37	9.69282e-208	1.2044	0.573	0.102	1.88041e-203	0.471	up
SETD3	1.16874e-207	1.30156	0.629	0.129	2.26736e-203	0.5	up
SNX13	1.28872e-207	1.56996	0.483	0.066	2.50011e-203	0.417	up
KLC4	1.45682e-207	1.80275	0.429	0.045	2.82623e-203	0.384	up
DNAJB4	1.56069e-207	2.04726	0.412	0.04	3.02774e-203	0.372	up
ARRDC2	1.74779e-207	1.97343	0.415	0.041	3.39072e-203	0.374	up
REL	2.1232e-207	3.20398	0.334	0.014	4.11901e-203	0.32	up
WDR47	2.33781e-207	2.33298	0.373	0.026	4.53536e-203	0.347	up
SENP2	3.5833e-207	1.35708	0.487	0.067	6.95159e-203	0.42	up
DENND4C	4.91901e-207	1.10254	0.641	0.132	9.54288e-203	0.509	up
RC3H2	5.56834e-207	1.59421	0.434	0.047	1.08026e-202	0.387	up
VASN	6.05288e-207	2.65074	0.341	0.016	1.17426e-202	0.325	up
NSF	6.96323e-207	1.17839	0.692	0.161	1.35087e-202	0.531	up
ABHD2	8.41807e-207	1.75052	0.567	0.108	1.63311e-202	0.459	up
KDM3A	2.68263e-206	1.11554	0.58	0.105	5.2043e-202	0.475	up
AFAP1	2.74931e-206	1.87814	0.539	0.094	5.33367e-202	0.445	up
GTDC1	3.01674e-206	1.90609	0.522	0.087	5.85248e-202	0.435	up
VPS8	3.27679e-206	1.08797	0.576	0.103	6.35698e-202	0.473	up
ZMYM2	3.28326e-206	1.59918	0.489	0.069	6.36952e-202	0.42	up
RNF111	5.08119e-206	1.34554	0.549	0.094	9.85751e-202	0.455	up
RPAP2	5.12843e-206	1.5014	0.466	0.06	9.94915e-202	0.406	up
STK17A	6.33414e-206	1.54067	0.641	0.142	1.22882e-201	0.499	up
FRMD4A	6.36118e-206	1.79004	0.414	0.041	1.23407e-201	0.373	up
CTSB	6.64012e-206	1.5319	0.847	0.472	1.28818e-201	0.375	up
VTA1	7.22017e-206	1.07994	0.548	0.092	1.40071e-201	0.456	up
EHMT1	8.16005e-206	1.18999	0.494	0.07	1.58305e-201	0.424	up
CLCN3	8.68135e-206	1.02785	0.685	0.154	1.68418e-201	0.531	up
MAFF	8.70944e-206	3.45756	0.315	0.009	1.68963e-201	0.306	up
SLC7A7	9.19874e-206	1.87774	0.418	0.043	1.78456e-201	0.375	up
MCU	9.55529e-206	1.57674	0.752	0.208	1.85373e-201	0.544	up
WDR59	1.10738e-205	1.34315	0.593	0.114	2.14831e-201	0.479	up
RABGEF1	1.83464e-205	1.66473	0.485	0.069	3.5592e-201	0.416	up
TVP23B	2.15864e-205	1.15368	0.589	0.111	4.18775e-201	0.478	up
DMXL2	2.1785e-205	1.47546	0.655	0.147	4.2263e-201	0.508	up
KLHL18	2.7409e-205	2.10794	0.403	0.038	5.31734e-201	0.365	up
NUPR1	3.37831e-205	1.82368	0.615	0.14	6.55393e-201	0.475	up
PGPEP1	4.02856e-205	2.37076	0.399	0.037	7.8154e-201	0.362	up
UBE2Q2	4.86446e-205	1.33804	0.587	0.113	9.43706e-201	0.474	up
CLASRP	5.08349e-205	1.82308	0.442	0.052	9.86196e-201	0.39	up
GFPT1	6.24289e-205	1.45632	0.728	0.191	1.21112e-200	0.537	up
UBE2E2	7.4642e-205	1.4068	0.777	0.218	1.44805e-200	0.559	up
GPHN	9.21198e-205	1.20931	0.793	0.221	1.78712e-200	0.572	up
CDKN2AIP	1.01618e-204	2.2401	0.359	0.022	1.97139e-200	0.337	up
MGA	1.05892e-204	1.24347	0.788	0.219	2.05431e-200	0.569	up
PANK2	1.25425e-204	1.77263	0.406	0.038	2.43324e-200	0.368	up
OPHN1	1.96899e-204	1.08646	0.776	0.207	3.81984e-200	0.569	up
NMI	3.31582e-204	2.09774	0.401	0.037	6.43268e-200	0.364	up
SOAT1	3.99203e-204	1.23971	0.825	0.263	7.74454e-200	0.562	up
MAN1A2	4.53722e-204	1.07602	0.532	0.085	8.8022e-200	0.447	up
SHB	4.65033e-204	1.61136	0.465	0.061	9.02165e-200	0.404	up
HECA	4.69803e-204	4.59324	0.293	0.003	9.11418e-200	0.29	up
ENSBTAG00000054998	6.01567e-204	2.54932	0.347	0.019	1.16704e-199	0.328	up
BAMBI	7.45725e-204	1.76563	0.443	0.053	1.44671e-199	0.39	up
NPPC	9.28678e-204	4.66095	0.291	0.003	1.80164e-199	0.288	up
CUL5	1.31568e-203	1.43937	0.464	0.06	2.55242e-199	0.404	up
TMEM50A	1.46525e-203	2.13145	0.373	0.027	2.84258e-199	0.346	up
ARID2	1.64515e-203	1.16769	0.629	0.131	3.19159e-199	0.498	up
TMOD3	3.84932e-203	1.23154	0.685	0.163	7.46768e-199	0.522	up
KMT2A	4.17249e-203	1.58695	0.417	0.043	8.09463e-199	0.374	up
ASH1L	4.62349e-203	1.15015	0.82	0.241	8.96956e-199	0.579	up
JAK2	5.05513e-203	2.25805	0.373	0.028	9.80696e-199	0.345	up
EFNA1	5.27184e-203	1.59991	0.641	0.149	1.02274e-198	0.492	up
SIK2	5.68743e-203	1.53623	0.603	0.124	1.10336e-198	0.479	up
NECTIN2	6.22906e-203	1.4256	0.79	0.24	1.20844e-198	0.55	up
STAM2	8.53828e-203	1.38267	0.524	0.086	1.65643e-198	0.438	up
RALGAPA2	9.03626e-203	3.21236	0.498	0.086	1.75303e-198	0.412	up
IQGAP2	1.41219e-202	1.78173	0.626	0.145	2.73965e-198	0.481	up
UQCR11	1.44975e-202	-1.80045	0.65	0.809	2.81252e-198	-0.159	down
ADCK5	1.52446e-202	1.36986	0.536	0.09	2.95745e-198	0.446	up
RABEP1	1.54346e-202	1.20388	0.53	0.087	2.9943e-198	0.443	up
RPS17	1.69105e-202	-1.1631	0.749	0.936	3.28064e-198	-0.187	down
GRAMD2B	1.89294e-202	2.05557	0.441	0.054	3.6723e-198	0.387	up
UTP6	2.31691e-202	1.27948	0.708	0.179	4.4948e-198	0.529	up
PARVA	3.09946e-202	1.19	0.606	0.121	6.01295e-198	0.485	up
ENSBTAG00000049406	3.39479e-202	3.31214	0.306	0.007	6.5859e-198	0.299	up
RCN2	5.09104e-202	1.15725	0.529	0.087	9.87661e-198	0.442	up
DAB2IP	5.16777e-202	1.97177	0.405	0.04	1.00255e-197	0.365	up
CCAR2	8.30495e-202	1.52182	0.526	0.088	1.61116e-197	0.438	up
DENND5A	8.32701e-202	2.33523	0.384	0.032	1.61544e-197	0.352	up
MAP3K5	1.14275e-201	1.8003	0.475	0.067	2.21693e-197	0.408	up
ODF2L	1.33805e-201	1.37479	0.465	0.061	2.59583e-197	0.404	up
SGPL1	1.54068e-201	1.81882	0.445	0.055	2.98891e-197	0.39	up
SLC30A5	1.70388e-201	1.14007	0.509	0.078	3.30552e-197	0.431	up
TIPARP	2.08541e-201	1.65594	0.425	0.047	4.04569e-197	0.378	up
FRY	2.19051e-201	3.1115	0.369	0.029	4.24959e-197	0.34	up
RAB3GAP1	2.78685e-201	1.24343	0.585	0.114	5.4065e-197	0.471	up
FBXO34	2.94097e-201	1.45817	0.472	0.064	5.70548e-197	0.408	up
RAB3GAP2	4.41531e-201	1.40005	0.524	0.087	8.56571e-197	0.437	up
KLHL24	5.10002e-201	3.28042	0.316	0.011	9.89404e-197	0.305	up
LAD1	5.36189e-201	1.49097	0.599	0.123	1.04021e-196	0.476	up
AP3B1	7.05944e-201	1.4319	0.922	0.386	1.36953e-196	0.536	up
LRIF1	7.41197e-201	1.52005	0.491	0.073	1.43792e-196	0.418	up
SCAF4	8.03915e-201	1.57747	0.454	0.058	1.5596e-196	0.396	up
HSPA2	9.41834e-201	2.72814	0.341	0.019	1.82716e-196	0.322	up
NUFIP2	1.01444e-200	1.34269	0.479	0.067	1.96802e-196	0.412	up
EDEM1	1.01477e-200	1.06094	0.56	0.1	1.96865e-196	0.46	up
ANKMY2	1.09606e-200	1.70269	0.461	0.062	2.12636e-196	0.399	up
RAB4A	1.19675e-200	1.57505	0.451	0.057	2.32169e-196	0.394	up
CLCC1	1.43781e-200	1.43043	0.449	0.055	2.78935e-196	0.394	up
TSC22D2	1.68467e-200	1.34089	0.837	0.265	3.26825e-196	0.572	up
UFL1	2.40639e-200	0.873675	0.524	0.083	4.6684e-196	0.441	ns
SH3RF1	2.57578e-200	1.21368	0.745	0.193	4.99701e-196	0.552	up
GINM1	2.59578e-200	2.27963	0.341	0.019	5.03581e-196	0.322	up
SMARCA2	3.09168e-200	1.90032	0.461	0.063	5.99786e-196	0.398	up
IP6K2	3.1648e-200	1.16674	0.596	0.117	6.1397e-196	0.479	up
CPA5	3.43175e-200	4.67274	0.287	0.003	6.65759e-196	0.284	up
PARN	4.92629e-200	1.22219	0.636	0.14	9.55699e-196	0.496	up
CBX4	5.05091e-200	3.34732	0.311	0.01	9.79876e-196	0.301	up
VIPR2	5.17746e-200	1.99876	0.543	0.107	1.00443e-195	0.436	up
USP34	6.07786e-200	1.26875	0.835	0.256	1.1791e-195	0.579	up
FGFR2	6.15621e-200	1.32337	0.791	0.229	1.19431e-195	0.562	up
SNX25	7.01683e-200	1.40359	0.499	0.077	1.36127e-195	0.422	up
KCTD6	7.22668e-200	2.29828	0.347	0.02	1.40198e-195	0.327	up
SRSF5	8.13302e-200	1.32868	0.852	0.299	1.57781e-195	0.553	up
FAM210B	8.62055e-200	1.74304	0.366	0.027	1.67239e-195	0.339	up
ST7	1.33278e-199	1.91943	0.409	0.043	2.58558e-195	0.366	up
UMAD1	1.78313e-199	1.52687	0.842	0.285	3.45928e-195	0.557	up
BCL2A1	1.78353e-199	4.38794	0.289	0.004	3.46005e-195	0.285	up
AMMECR1L	2.2451e-199	1.75231	0.395	0.037	4.3555e-195	0.358	up
TCIRG1	2.42964e-199	1.30551	0.567	0.106	4.71349e-195	0.461	up
SDE2	3.24667e-199	1.69166	0.44	0.054	6.29853e-195	0.386	up
EPC2	3.32691e-199	1.31684	0.508	0.08	6.45421e-195	0.428	up
RBM26	3.54915e-199	1.01292	0.688	0.16	6.88534e-195	0.528	up
CTSK	4.93726e-199	4.88645	0.302	0.008	9.57828e-195	0.294	up
NEU1	7.2099e-199	1.4627	0.439	0.053	1.39872e-194	0.386	up
AP3S1	2.063e-198	1.13811	0.682	0.167	4.00223e-194	0.515	up
ARNT	2.54249e-198	1.28154	0.461	0.061	4.93243e-194	0.4	up
CYB561A3	2.55056e-198	2.88678	0.327	0.015	4.9481e-194	0.312	up
ZBTB10	2.61446e-198	1.39461	0.484	0.071	5.07205e-194	0.413	up
ZFYVE9	2.74313e-198	1.59366	0.449	0.057	5.32166e-194	0.392	up
SAMD4A	3.33064e-198	1.82328	0.505	0.084	6.46144e-194	0.421	up
PYGL	3.39882e-198	3.50558	0.299	0.007	6.59372e-194	0.292	up
INPP5B	3.62648e-198	1.61003	0.427	0.049	7.03538e-194	0.378	up
PSME4	3.67196e-198	1.17119	0.633	0.136	7.1236e-194	0.497	up
ZNF644	4.05862e-198	1.37043	0.516	0.084	7.87373e-194	0.432	up
SYNE4	4.20288e-198	2.5648	0.341	0.02	8.15359e-194	0.321	up
CRK	4.51402e-198	1.13492	0.521	0.085	8.7572e-194	0.436	up
MRTFB	4.65615e-198	1.14694	0.723	0.184	9.03293e-194	0.539	up
RPS15A	5.02478e-198	-1.38753	0.742	0.899	9.74806e-194	-0.157	down
PPM1D	5.54049e-198	1.76678	0.41	0.043	1.07486e-193	0.367	up
ENSBTAG00000012054	6.80991e-198	2.65944	0.351	0.023	1.32112e-193	0.328	up
BIN2	7.31396e-198	1.30464	0.679	0.165	1.41891e-193	0.514	up
TACC2	7.51585e-198	1.43947	0.517	0.086	1.45807e-193	0.431	up
TRAPPC9	7.71725e-198	1.52893	0.462	0.063	1.49715e-193	0.399	up
RPL39	9.4501e-198	-1.51249	0.739	0.944	1.83332e-193	-0.205	down
DLG1	1.18956e-197	1.33283	0.837	0.261	2.30775e-193	0.576	up
ENSBTAG00000046486	1.41492e-197	2.73844	0.313	0.011	2.74495e-193	0.302	up
ASXL1	1.49352e-197	1.1733	0.535	0.091	2.89743e-193	0.444	up
CCNC	1.57439e-197	1.43981	0.563	0.108	3.05431e-193	0.455	up
ASB3	1.84091e-197	1.63046	0.429	0.05	3.57137e-193	0.379	up
MAPK9	2.25004e-197	1.50447	0.457	0.061	4.36508e-193	0.396	up
ACACA	2.44648e-197	1.19505	0.747	0.197	4.74617e-193	0.55	up
CDKN1A	2.96993e-197	1.58805	0.495	0.079	5.76166e-193	0.416	up
SOS1	3.08624e-197	1.12028	0.731	0.186	5.98731e-193	0.545	up
PAFAH1B1	3.19677e-197	1.2796	0.903	0.345	6.20172e-193	0.558	up
UBR4	3.21146e-197	1.20708	0.8	0.234	6.23023e-193	0.566	up
TMEM30A	4.70019e-197	1.30827	0.425	0.048	9.11838e-193	0.377	up
CNOT6L	4.70061e-197	1.46627	0.518	0.087	9.11919e-193	0.431	up
PRPF38B	4.70381e-197	0.921532	0.591	0.114	9.12539e-193	0.477	ns
SLC4A5	6.45971e-197	1.73067	0.431	0.052	1.25318e-192	0.379	up
USP8	6.68779e-197	1.03082	0.719	0.178	1.29743e-192	0.541	up
EWSR1	7.57717e-197	1.1126	0.745	0.196	1.46997e-192	0.549	up
LANCL2	7.99979e-197	1.14141	0.586	0.116	1.55196e-192	0.47	up
LIMA1	1.7995e-196	1.45667	0.728	0.2	3.49103e-192	0.528	up
TBC1D4	1.81361e-196	4.57052	0.303	0.009	3.51839e-192	0.294	up
NCOA4	2.04749e-196	1.08482	0.539	0.093	3.97212e-192	0.446	up
NBR1	2.37157e-196	1.19308	0.555	0.102	4.60085e-192	0.453	up
PDZK1	2.5288e-196	1.4211	0.541	0.099	4.90588e-192	0.442	up
GOLIM4	2.94448e-196	1.45739	0.457	0.062	5.71229e-192	0.395	up
FBXL5	3.41514e-196	1.9141	0.45	0.06	6.62538e-192	0.39	up
PRR14L	3.48082e-196	1.00942	0.723	0.181	6.75278e-192	0.542	up
TMEM59	5.02392e-196	1.29724	0.542	0.099	9.74641e-192	0.443	up
PPM1H	5.81471e-196	1.41916	0.661	0.158	1.12805e-191	0.503	up
CPEB3	6.89052e-196	1.8586	0.455	0.063	1.33676e-191	0.392	up
ATRX	9.22864e-196	1.04642	0.797	0.222	1.79036e-191	0.575	up
SIRT1	1.16848e-195	1.86089	0.425	0.05	2.26685e-191	0.375	up
IDH2	1.20185e-195	2.19117	0.363	0.028	2.33159e-191	0.335	up
STX12	1.22188e-195	1.09595	0.651	0.147	2.37045e-191	0.504	up
ERGIC2	1.4075e-195	1.02902	0.589	0.117	2.73055e-191	0.472	up
LRCH3	1.71204e-195	1.07578	0.625	0.132	3.32135e-191	0.493	up
CDK17	2.04938e-195	2.23171	0.391	0.038	3.9758e-191	0.353	up
PPM1B	2.36492e-195	0.969668	0.671	0.154	4.58794e-191	0.517	ns
ALS2CL	4.40366e-195	2.59931	0.36	0.028	8.5431e-191	0.332	up
SPTLC1	4.85143e-195	0.943659	0.664	0.152	9.41178e-191	0.512	ns
UGCG	6.00804e-195	1.10629	0.621	0.133	1.16556e-190	0.488	up
XRN2	7.04554e-195	1.22226	0.691	0.174	1.36683e-190	0.517	up
WASHC4	9.29523e-195	1.35474	0.477	0.069	1.80327e-190	0.408	up
PLEKHF2	9.41161e-195	1.2486	0.492	0.076	1.82585e-190	0.416	up
ZFAND2A	1.07776e-194	2.61636	0.397	0.043	2.09085e-190	0.354	up
CLCN5	1.27371e-194	1.41042	0.573	0.114	2.47099e-190	0.459	up
BASP1	1.34635e-194	-1.43438	0.623	0.897	2.61192e-190	-0.274	down
MFGE8	1.96274e-194	1.4682	0.841	0.361	3.80772e-190	0.48	up
EIF2AK2	3.1558e-194	2.15194	0.404	0.044	6.12226e-190	0.36	up
AMFR	3.85875e-194	1.17513	0.509	0.084	7.48598e-190	0.425	up
MORC3	4.34659e-194	1.45017	0.464	0.066	8.43238e-190	0.398	up
SAFB2	4.92945e-194	1.11485	0.595	0.121	9.56314e-190	0.474	up
SMG8	5.36834e-194	1.2069	0.699	0.181	1.04146e-189	0.518	up
PCNX1	5.62397e-194	1.46095	0.464	0.066	1.09105e-189	0.398	up
BAG3	6.92992e-194	2.30645	0.453	0.066	1.3444e-189	0.387	up
FGF1	8.58136e-194	4.77071	0.285	0.005	1.66478e-189	0.28	up
PKN1	9.0643e-194	1.47929	0.475	0.071	1.75847e-189	0.404	up
SLC41A2	9.70296e-194	1.1335	0.679	0.164	1.88238e-189	0.515	up
DHX32	1.0814e-193	1.15427	0.549	0.1	2.09791e-189	0.449	up
MISP3	2.36364e-193	1.58001	0.531	0.099	4.58546e-189	0.432	up
PSAP	2.54271e-193	1.49359	0.8	0.293	4.93287e-189	0.507	up
NR2F2	3.02731e-193	1.85418	0.37	0.031	5.87299e-189	0.339	up
GAPDH	4.19312e-193	-1.28347	0.841	0.983	8.13465e-189	-0.142	ns
DPY19L4	4.47469e-193	1.19494	0.507	0.083	8.68089e-189	0.424	up
NPEPPS	6.06985e-193	1.37283	0.881	0.325	1.17755e-188	0.556	up
KANK1	7.63242e-193	3.37356	0.361	0.031	1.48069e-188	0.33	up
PNRC1	1.16923e-192	2.09038	0.345	0.023	2.2683e-188	0.322	up
TXLNG	1.29486e-192	1.37907	0.439	0.056	2.51203e-188	0.383	up
PLEKHG3	1.64625e-192	1.36206	0.478	0.072	3.19373e-188	0.406	up
PTPN23	1.68322e-192	1.24795	0.516	0.089	3.26544e-188	0.427	up
BAZ2A	1.81641e-192	0.836521	0.63	0.135	3.52383e-188	0.495	ns
SPRED2	1.89151e-192	1.6188	0.47	0.07	3.66952e-188	0.4	up
TMX4	2.20821e-192	1.6964	0.375	0.033	4.28393e-188	0.342	up
CLIP1	2.41616e-192	1.16214	0.701	0.176	4.68734e-188	0.525	up
PLEKHA2	3.17369e-192	4.18466	0.288	0.006	6.15695e-188	0.282	up
LMBRD1	3.72042e-192	1.04049	0.58	0.114	7.21762e-188	0.466	up
DAAM1	3.86548e-192	1.38203	0.601	0.129	7.49903e-188	0.472	up
CD164	3.9266e-192	1.16528	0.687	0.178	7.6176e-188	0.509	up
RIT1	3.93033e-192	2.08472	0.355	0.027	7.62485e-188	0.328	up
MFF	4.04072e-192	1.04851	0.545	0.099	7.839e-188	0.446	up
ZC3H13	4.25176e-192	1.66258	0.373	0.032	8.24841e-188	0.341	up
ARIH2	4.97924e-192	1.11673	0.478	0.071	9.65973e-188	0.407	up
HECTD1	6.34678e-192	0.756592	0.643	0.139	1.23127e-187	0.504	ns
FOXN3	7.01832e-192	1.29187	0.901	0.345	1.36155e-187	0.556	up
AHCYL1	7.90493e-192	1.15829	0.548	0.102	1.53356e-187	0.446	up
GTF2F2	1.02862e-191	1.19842	0.659	0.158	1.99553e-187	0.501	up
SLC38A6	1.09168e-191	1.67689	0.519	0.093	2.11787e-187	0.426	up
NCEH1	1.14506e-191	3.4335	0.294	0.008	2.22141e-187	0.286	up
SLC30A7	1.22175e-191	1.42731	0.437	0.056	2.37019e-187	0.381	up
CLK4	1.24777e-191	1.57577	0.418	0.049	2.42067e-187	0.369	up
CUL3	1.36043e-191	1.11049	0.776	0.221	2.63923e-187	0.555	up
NUDT3	2.0608e-191	1.06348	0.674	0.162	3.99796e-187	0.512	up
LGALS9	2.07683e-191	1.68199	0.518	0.094	4.02904e-187	0.424	up
INTS9	2.27303e-191	1.20519	0.48	0.072	4.40968e-187	0.408	up
PRKD3	2.75878e-191	3.5591	0.299	0.01	5.35204e-187	0.289	up
RSBN1L	5.21663e-191	1.28457	0.48	0.074	1.01203e-186	0.406	up
CCN2	6.37975e-191	2.3358	0.417	0.052	1.23767e-186	0.365	up
QRICH1	7.99965e-191	1.02306	0.553	0.103	1.55193e-186	0.45	up
POC1B	1.0305e-190	0.843123	0.624	0.133	1.99917e-186	0.491	ns
RABGAP1	1.13606e-190	1.1025	0.617	0.134	2.20396e-186	0.483	up
XPO4	1.64234e-190	1.04134	0.541	0.097	3.18613e-186	0.444	up
HSD17B11	1.79133e-190	2.03571	0.358	0.029	3.47519e-186	0.329	up
SPATS2	2.80045e-190	1.62192	0.418	0.05	5.43288e-186	0.368	up
YTHDF3	3.36861e-190	1.0538	0.758	0.21	6.53511e-186	0.548	up
PML	4.04202e-190	2.73701	0.326	0.018	7.84152e-186	0.308	up
IGF2	5.40895e-190	2.48365	0.344	0.024	1.04934e-185	0.32	up
WDR20	5.82342e-190	1.23496	0.476	0.072	1.12974e-185	0.404	up
OAT	6.22918e-190	1.62151	0.534	0.103	1.20846e-185	0.431	up
CRYBG1	6.31327e-190	3.59669	0.293	0.008	1.22478e-185	0.285	up
CHUK	6.3832e-190	1.3855	0.435	0.056	1.23834e-185	0.379	up
SLC15A4	6.41203e-190	1.1556	0.497	0.081	1.24393e-185	0.416	up
PPP1R12A	1.06775e-189	1.10735	0.867	0.289	2.07144e-185	0.578	up
ATP5MJ	1.28257e-189	-2.00455	0.651	0.777	2.48819e-185	-0.126	ns
PCMTD2	1.40838e-189	1.70527	0.397	0.043	2.73226e-185	0.354	up
NBEAL1	1.54854e-189	1.30513	0.716	0.192	3.00416e-185	0.524	up
SLCO2B1	1.58511e-189	1.62152	0.412	0.048	3.07512e-185	0.364	up
RNF157	1.71073e-189	1.87545	0.415	0.05	3.31882e-185	0.365	up
UBAC2	1.74557e-189	1.20132	0.611	0.134	3.38641e-185	0.477	up
GCGR	1.87261e-189	1.24345	0.683	0.176	3.63286e-185	0.507	up
ARMC1	2.22518e-189	0.983034	0.666	0.159	4.31686e-185	0.507	ns
TRIM33	2.9142e-189	1.02689	0.669	0.159	5.65355e-185	0.51	up
SHANK2	2.93946e-189	1.42134	0.647	0.159	5.70255e-185	0.488	up
EPB41L4B	4.65054e-189	1.05799	0.599	0.126	9.02205e-185	0.473	up
TJP2	5.9756e-189	1.39769	0.947	0.438	1.15927e-184	0.509	up
CSH2	6.92717e-189	3.44194	0.267	0.001	1.34387e-184	0.266	up
LRRC41	7.31273e-189	1.05407	0.525	0.092	1.41867e-184	0.433	up
SMARCA1	7.80673e-189	2.03458	0.465	0.073	1.51451e-184	0.392	up
SEC22A	8.56157e-189	1.17968	0.489	0.078	1.66094e-184	0.411	up
VPS54	9.82031e-189	1.02556	0.587	0.119	1.90514e-184	0.468	up
FHIT	1.03058e-188	1.53439	0.618	0.148	1.99932e-184	0.47	up
FEM1B	1.08607e-188	1.78187	0.403	0.045	2.10697e-184	0.358	up
ENSBTAG00000005495	1.59682e-188	1.48387	0.43	0.055	3.09782e-184	0.375	up
ZFYVE26	2.56232e-188	1.30977	0.489	0.079	4.9709e-184	0.41	up
SETD2	3.01105e-188	1.00643	0.516	0.088	5.84144e-184	0.428	up
BCAS3	3.47899e-188	1.55953	0.715	0.2	6.74924e-184	0.515	up
CAMSAP1	3.61895e-188	1.08947	0.535	0.097	7.02077e-184	0.438	up
SRPK2	4.27501e-188	1.0871	0.765	0.217	8.29353e-184	0.548	up
TMCC1	6.28863e-188	1.25712	0.613	0.136	1.21999e-183	0.477	up
MICAL3	6.96155e-188	2.06324	0.381	0.038	1.35054e-183	0.343	up
PAG17	7.46332e-188	4.82769	0.266	0.001	1.44788e-183	0.265	up
LPP	8.70611e-188	1.5568	0.872	0.354	1.68899e-183	0.518	up
TBC1D14	8.86337e-188	1.15139	0.523	0.093	1.71949e-183	0.43	up
CDK2	1.08144e-187	1.23059	0.473	0.072	2.09799e-183	0.401	up
RAVER2	1.09176e-187	3.23562	0.313	0.015	2.11801e-183	0.298	up
ATP6AP1	1.30369e-187	1.3514	0.663	0.177	2.52916e-183	0.486	up
USP25	1.31358e-187	1.71283	0.46	0.069	2.54834e-183	0.391	up
KDM5B	1.3456e-187	0.992252	0.673	0.162	2.61046e-183	0.511	ns
PPFIA1	1.44975e-187	0.96771	0.748	0.201	2.81252e-183	0.547	ns
PHLPP1	1.45197e-187	1.29933	0.479	0.076	2.81682e-183	0.403	up
CYP11A1	1.61434e-187	1.56104	0.652	0.174	3.13183e-183	0.478	up
ABL2	1.83417e-187	1.09734	0.613	0.134	3.55829e-183	0.479	up
UBE4A	1.88285e-187	0.765302	0.561	0.106	3.65274e-183	0.455	ns
EDEM3	1.89522e-187	1.04522	0.531	0.096	3.67673e-183	0.435	up
PPP1R36	2.17217e-187	3.8472	0.282	0.006	4.21402e-183	0.276	up
KAT6B	2.56312e-187	0.97257	0.645	0.148	4.97245e-183	0.497	ns
PAPOLA	2.69375e-187	1.27583	0.833	0.285	5.22587e-183	0.548	up
SETD5	3.1543e-187	0.977557	0.744	0.2	6.11934e-183	0.544	ns
IL1R1	3.72946e-187	5.12692	0.266	0.002	7.23516e-183	0.264	up
FTH1	3.94725e-187	-0.957141	0.842	0.999	7.65767e-183	-0.157	ns
ATP2B1	4.09415e-187	1.35649	0.772	0.238	7.94265e-183	0.534	up
SLC15A1	4.29706e-187	1.05849	0.624	0.141	8.3363e-183	0.483	up
SNX2	5.94226e-187	1.17383	0.739	0.213	1.1528e-182	0.526	up
UBE2W	1.02469e-186	1.05599	0.554	0.106	1.9879e-182	0.448	up
DNAJB14	1.19292e-186	1.19792	0.454	0.065	2.31427e-182	0.389	up
ANKS1A	1.59524e-186	0.812081	0.662	0.154	3.09477e-182	0.508	ns
CCNYL1	1.7787e-186	2.69879	0.333	0.022	3.45068e-182	0.311	up
ULK3	2.03527e-186	1.52218	0.413	0.05	3.94843e-182	0.363	up
MBNL1	2.88637e-186	1.60441	0.539	0.106	5.59955e-182	0.433	up
ROCK2	3.09219e-186	1.12242	0.853	0.282	5.99884e-182	0.571	up
SESTD1	3.14338e-186	1.27759	0.501	0.085	6.09816e-182	0.416	up
PRKN	3.30759e-186	2.19536	0.533	0.112	6.41673e-182	0.421	up
SERTAD2	3.37828e-186	1.2102	0.483	0.078	6.55386e-182	0.405	up
KANSL2	3.43837e-186	1.90338	0.359	0.031	6.67044e-182	0.328	up
ELOVL2	3.46346e-186	4.13832	0.278	0.005	6.7191e-182	0.273	up
FOXK2	4.44548e-186	1.19932	0.439	0.059	8.62423e-182	0.38	up
UBE3C	4.921e-186	0.955701	0.553	0.105	9.54674e-182	0.448	ns
LSM14A	5.45661e-186	1.02437	0.647	0.152	1.05858e-181	0.495	up
VEGFA	8.72027e-186	1.74891	0.365	0.033	1.69173e-181	0.332	up
TTPA	1.23083e-185	2.27333	0.325	0.02	2.3878e-181	0.305	up
BCNT2	1.89049e-185	1.45601	0.413	0.05	3.66754e-181	0.363	up
ZNF326	2.14776e-185	1.06829	0.737	0.204	4.16665e-181	0.533	up
SHOC2	2.34536e-185	1.01654	0.525	0.095	4.55e-181	0.43	up
A2M	3.42037e-185	3.61791	0.275	0.005	6.63553e-181	0.27	up
ENSBTAG00000022204	3.70602e-185	1.81416	0.354	0.029	7.18968e-181	0.325	up
ZNF638	3.92168e-185	1.02991	0.818	0.246	7.60807e-181	0.572	up
DIPK1A	5.04932e-185	1.47402	0.551	0.112	9.79568e-181	0.439	up
RIF1	5.31115e-185	0.90335	0.622	0.137	1.03036e-180	0.485	ns
MDFIC	6.65709e-185	1.64181	0.479	0.079	1.29148e-180	0.4	up
PXN	7.48273e-185	0.98356	0.608	0.132	1.45165e-180	0.476	ns
NIPAL1	7.68023e-185	1.59676	0.421	0.054	1.48996e-180	0.367	up
RPTOR	7.91351e-185	1.00456	0.579	0.119	1.53522e-180	0.46	up
IL1RAP	8.03525e-185	2.16135	0.343	0.026	1.55884e-180	0.317	up
UBE2G1	8.09448e-185	1.07809	0.779	0.23	1.57033e-180	0.549	up
SFT2D1	1.13634e-184	1.11302	0.62	0.142	2.2045e-180	0.478	up
AFTPH	1.3974e-184	1.43787	0.423	0.055	2.71096e-180	0.368	up
BDP1	1.50663e-184	0.972065	0.709	0.18	2.92287e-180	0.529	ns
RNF43	1.52591e-184	3.5642	0.291	0.01	2.96026e-180	0.281	up
NAF1	1.57444e-184	1.06966	0.505	0.087	3.05442e-180	0.418	up
ASXL2	1.6584e-184	1.14745	0.55	0.107	3.21729e-180	0.443	up
ATP6V1C1	2.17769e-184	0.966082	0.687	0.171	4.22472e-180	0.516	ns
CEP120	2.82536e-184	1.64822	0.411	0.051	5.48119e-180	0.36	up
SMARCAD1	4.09188e-184	1.04308	0.54	0.102	7.93826e-180	0.438	up
DGCR2	5.28489e-184	0.818447	0.597	0.126	1.02527e-179	0.471	ns
UBR3	8.23949e-184	0.924026	0.568	0.113	1.59846e-179	0.455	ns
CMTM6	1.12231e-183	0.862218	0.491	0.08	2.17729e-179	0.411	ns
GLB1	1.2768e-183	0.917048	0.551	0.107	2.47699e-179	0.444	ns
LIPH	1.43615e-183	1.54595	0.441	0.063	2.78612e-179	0.378	up
MARCHF8	1.55277e-183	1.64357	0.374	0.037	3.01236e-179	0.337	up
PPP1R12B	1.68532e-183	1.2861	0.442	0.062	3.26951e-179	0.38	up
ZC3H10	1.6988e-183	-1.0267	0.875	0.999	3.29568e-179	-0.124	ns
PEG10	1.86064e-183	2.18904	0.383	0.042	3.60964e-179	0.341	up
ATF2	1.88638e-183	1.55635	0.411	0.05	3.65957e-179	0.361	up
ATG4A	2.0944e-183	1.60336	0.397	0.045	4.06313e-179	0.352	up
DCAF8	2.78151e-183	1.2433	0.5	0.087	5.39614e-179	0.413	up
TCF7L2	2.82858e-183	1.28602	0.77	0.232	5.48745e-179	0.538	up
NCSTN	2.86805e-183	1.04416	0.461	0.069	5.56402e-179	0.392	up
ALDH9A1	2.96996e-183	1.8504	0.357	0.031	5.76173e-179	0.326	up
PPP2R5E	3.05899e-183	0.832116	0.697	0.172	5.93443e-179	0.525	ns
RAB3IP	3.19775e-183	1.14129	0.457	0.068	6.20364e-179	0.389	up
MYNN	3.28538e-183	1.57696	0.369	0.035	6.37363e-179	0.334	up
LAPTM4A	3.41514e-183	1.30343	0.774	0.273	6.62536e-179	0.501	up
RAB20	3.65499e-183	1.90998	0.37	0.036	7.09067e-179	0.334	up
PTPN1	4.46422e-183	1.35126	0.561	0.116	8.66058e-179	0.445	up
ARFIP1	4.51643e-183	0.984255	0.547	0.105	8.76186e-179	0.442	ns
MINDY3	5.21213e-183	0.992142	0.615	0.138	1.01115e-178	0.477	ns
PPIC	6.43694e-183	2.29626	0.309	0.015	1.24877e-178	0.294	up
SLC12A2	6.53767e-183	1.31747	0.549	0.109	1.26831e-178	0.44	up
CCDC91	8.88953e-183	1.10149	0.615	0.14	1.72457e-178	0.475	up
ANO10	1.05288e-182	1.05892	0.641	0.152	2.04258e-178	0.489	up
PPP2CB	1.58388e-182	1.02796	0.651	0.158	3.07272e-178	0.493	up
HIBADH	1.92422e-182	1.18032	0.611	0.139	3.73298e-178	0.472	up
PHF3	2.31375e-182	0.93207	0.738	0.2	4.48867e-178	0.538	ns
WTAP	2.43046e-182	0.966681	0.673	0.166	4.71509e-178	0.507	ns
AZI2	2.54934e-182	1.25007	0.45	0.066	4.94573e-178	0.384	up
KLHDC2	3.11164e-182	1.05102	0.493	0.083	6.03658e-178	0.41	up
ABCA1	3.14074e-182	1.69413	0.546	0.113	6.09304e-178	0.433	up
AP1G1	4.31746e-182	0.87621	0.545	0.104	8.37587e-178	0.441	ns
UBE2E3	4.92258e-182	1.21041	0.851	0.306	9.54981e-178	0.545	up
DAPP1	5.29546e-182	2.99798	0.313	0.018	1.02732e-177	0.295	up
BMPR2	6.18917e-182	1.10731	0.57	0.118	1.2007e-177	0.452	up
CDK12	6.64357e-182	0.862016	0.56	0.11	1.28885e-177	0.45	ns
IL10RB	6.87745e-182	1.12855	0.544	0.107	1.33422e-177	0.437	up
ZSWIM4	9.16954e-182	2.08256	0.369	0.037	1.77889e-177	0.332	up
TASOR2	1.30246e-181	1.11646	0.565	0.115	2.52676e-177	0.45	up
HDAC5	1.46886e-181	1.63883	0.403	0.049	2.84959e-177	0.354	up
FBXO3	1.7275e-181	1.22242	0.459	0.071	3.35135e-177	0.388	up
LRP10	1.99551e-181	0.928469	0.576	0.12	3.87129e-177	0.456	ns
LYPD6	2.35289e-181	1.53972	0.565	0.123	4.56461e-177	0.442	up
SLC20A1	2.40649e-181	1.83736	0.493	0.087	4.66859e-177	0.406	up
FAM172A	4.7139e-181	1.69169	0.406	0.05	9.14497e-177	0.356	up
CDC73	5.53953e-181	1.00521	0.519	0.095	1.07467e-176	0.424	up
MAN2A2	5.71974e-181	1.5196	0.387	0.043	1.10963e-176	0.344	up
STX16	6.79768e-181	1.79334	0.343	0.027	1.31875e-176	0.316	up
PDZD2	7.62184e-181	3.68853	0.294	0.012	1.47864e-176	0.282	up
USP4	8.42263e-181	1.02618	0.525	0.098	1.63399e-176	0.427	up
STRBP	9.70134e-181	1.00539	0.767	0.222	1.88206e-176	0.545	up
ASAP3	1.0989e-180	3.29497	0.288	0.01	2.13186e-176	0.278	up
ZFR	1.58372e-180	0.800843	0.589	0.124	3.07242e-176	0.465	ns
DLGAP4	1.77006e-180	1.97519	0.361	0.034	3.43392e-176	0.327	up
KLHL32	2.021e-180	5.06807	0.262	0.003	3.92073e-176	0.259	up
CECR2	2.0599e-180	1.84011	0.405	0.051	3.9962e-176	0.354	up
RALGAPB	2.28418e-180	1.56138	0.399	0.048	4.4313e-176	0.351	up
HEYL	2.71824e-180	2.25019	0.311	0.017	5.27338e-176	0.294	up
CUL4A	3.0012e-180	1.61342	0.381	0.041	5.82232e-176	0.34	up
SENP5	3.43767e-180	1.39204	0.389	0.044	6.66909e-176	0.345	up
ZDHHC3	5.35512e-180	1.0573	0.612	0.138	1.03889e-175	0.474	up
CTNNAL1	5.45906e-180	2.68345	0.341	0.028	1.05906e-175	0.313	up
JADE3	5.77292e-180	1.09998	0.643	0.156	1.11995e-175	0.487	up
TASOR	6.17177e-180	0.99862	0.545	0.106	1.19732e-175	0.439	ns
PSPC1	7.21879e-180	0.929369	0.709	0.186	1.40044e-175	0.523	ns
VIM	9.96459e-180	2.09385	0.388	0.045	1.93313e-175	0.343	up
PTPN3	1.17787e-179	1.37821	0.413	0.053	2.28506e-175	0.36	up
GPATCH2	1.39022e-179	1.02249	0.597	0.132	2.69703e-175	0.465	up
WDR33	1.51179e-179	0.907835	0.731	0.197	2.93287e-175	0.534	ns
EVL	1.71762e-179	1.15442	0.767	0.229	3.33218e-175	0.538	up
ZCCHC2	1.98595e-179	2.70416	0.315	0.019	3.85274e-175	0.296	up
RNF169	2.44188e-179	1.87577	0.349	0.03	4.73725e-175	0.319	up
MEF2D	2.58038e-179	2.19186	0.318	0.02	5.00594e-175	0.298	up
AMOT	2.74977e-179	1.28559	0.736	0.215	5.33455e-175	0.521	up
TGIF1	2.8594e-179	1.42983	0.449	0.069	5.54724e-175	0.38	up
BBS4	2.92644e-179	1.40341	0.396	0.047	5.67729e-175	0.349	up
IRF3	3.3751e-179	1.21262	0.524	0.1	6.5477e-175	0.424	up
PLSCR2	3.6344e-179	3.19361	0.285	0.01	7.05073e-175	0.275	up
HES2	3.87435e-179	1.36341	0.426	0.058	7.51624e-175	0.368	up
TOB2	3.98217e-179	1.62876	0.371	0.038	7.72542e-175	0.333	up
USP33	4.74449e-179	0.91472	0.576	0.121	9.20431e-175	0.455	ns
HOOK1	5.06119e-179	0.963741	0.523	0.098	9.81871e-175	0.425	ns
SPTSSA	9.40649e-179	1.41971	0.502	0.093	1.82486e-174	0.409	up
ZCCHC7	9.62435e-179	0.969316	0.783	0.231	1.86712e-174	0.552	ns
SKAP2	1.12133e-178	1.09745	0.535	0.104	2.17539e-174	0.431	up
EXOC2	1.24231e-178	1.2051	0.475	0.079	2.41009e-174	0.396	up
ZNF277	1.56263e-178	1.19101	0.537	0.107	3.0315e-174	0.43	up
SAMD12	1.777e-178	1.41958	0.619	0.153	3.44738e-174	0.466	up
SPPL2A	2.15924e-178	0.897134	0.613	0.14	4.18893e-174	0.473	ns
PSEN2	2.67723e-178	1.48319	0.386	0.044	5.19383e-174	0.342	up
YIPF4	3.10343e-178	1.90324	0.352	0.032	6.02066e-174	0.32	up
MAPKAPK5	3.16813e-178	1.15018	0.523	0.1	6.14617e-174	0.423	up
SLAIN2	3.33524e-178	0.951619	0.599	0.133	6.47036e-174	0.466	ns
RSBN1	4.19063e-178	1.53037	0.382	0.043	8.12983e-174	0.339	up
UNC13D	4.21844e-178	1.34517	0.458	0.073	8.18377e-174	0.385	up
ESRP1	6.45054e-178	0.98498	0.758	0.215	1.25141e-173	0.543	ns
SESN1	7.32969e-178	1.17198	0.564	0.12	1.42196e-173	0.444	up
LUC7L2	8.26574e-178	0.812838	0.577	0.121	1.60355e-173	0.456	ns
NR2C2	8.48834e-178	1.22813	0.431	0.061	1.64674e-173	0.37	up
TGFBR1	9.72285e-178	1.39805	0.428	0.06	1.88623e-173	0.368	up
BAIAP2	1.2102e-177	1.61343	0.516	0.102	2.34778e-173	0.414	up
ATP6V1H	1.22711e-177	0.933095	0.519	0.097	2.38059e-173	0.422	ns
PATJ	1.24559e-177	1.17683	0.85	0.282	2.41645e-173	0.568	up
HBS1L	1.2846e-177	0.844115	0.531	0.101	2.49211e-173	0.43	ns
NDFIP1	1.29295e-177	0.895825	0.511	0.093	2.50833e-173	0.418	ns
PHACTR4	1.48478e-177	1.21153	0.543	0.111	2.88047e-173	0.432	up
C1GALT1	1.70754e-177	1.19931	0.521	0.099	3.31262e-173	0.422	up
MED12	2.15158e-177	1.45705	0.414	0.055	4.17406e-173	0.359	up
TDRP	2.17577e-177	3.22842	0.282	0.01	4.221e-173	0.272	up
ENSBTAG00000045939	2.50438e-177	5.31763	0.26	0.004	4.85849e-173	0.256	up
M6PR	2.98974e-177	1.02991	0.597	0.134	5.8001e-173	0.463	up
IMMP1L	3.66338e-177	1.33785	0.454	0.072	7.10695e-173	0.382	up
CCNI	3.92203e-177	1.10007	0.686	0.188	7.60874e-173	0.498	up
DDX42	4.02061e-177	0.871592	0.557	0.112	7.79998e-173	0.445	ns
HEY1	4.21018e-177	3.01878	0.281	0.01	8.16776e-173	0.271	up
BRD8	4.52036e-177	1.5148	0.366	0.037	8.7695e-173	0.329	up
SLC44A1	4.78312e-177	1.03287	0.635	0.152	9.27925e-173	0.483	up
RLIM	4.82397e-177	0.785731	0.556	0.112	9.3585e-173	0.444	ns
WDR17	5.841e-177	3.65611	0.275	0.008	1.13315e-172	0.267	up
ENSBTAG00000051886	6.28176e-177	2.07671	0.327	0.024	1.21866e-172	0.303	up
COG5	6.62597e-177	1.19364	0.566	0.122	1.28544e-172	0.444	up
STRADA	6.74689e-177	1.24105	0.422	0.058	1.3089e-172	0.364	up
RAB10	6.82353e-177	1.01677	0.698	0.187	1.32377e-172	0.511	up
DCAF1	7.44624e-177	1.12817	0.494	0.088	1.44457e-172	0.406	up
ATP6	7.90363e-177	-1.09783	0.806	0.998	1.53331e-172	-0.192	down
UBQLN1	9.00002e-177	0.789636	0.674	0.167	1.746e-172	0.507	ns
PARD6B	1.20282e-176	1.11757	0.729	0.209	2.33347e-172	0.52	up
IKBKB	1.28518e-176	1.30455	0.444	0.067	2.49325e-172	0.377	up
KRIT1	1.28645e-176	1.43425	0.39	0.046	2.49572e-172	0.344	up
AGPS	1.57528e-176	1.00033	0.756	0.215	3.05605e-172	0.541	up
ENSBTAG00000007187	1.57785e-176	1.43919	0.413	0.055	3.06102e-172	0.358	up
SH3BGRL2	1.85235e-176	1.26962	0.721	0.21	3.59356e-172	0.511	up
PLCG2	2.11535e-176	2.70616	0.292	0.013	4.10377e-172	0.279	up
CCDC88C	2.60955e-176	3.32966	0.269	0.006	5.06253e-172	0.263	up
AKAP10	2.86201e-176	1.02328	0.45	0.069	5.5523e-172	0.381	up
FHDC1	3.24819e-176	4.19581	0.256	0.003	6.30149e-172	0.253	up
RNF19B	4.08227e-176	3.01208	0.288	0.012	7.9196e-172	0.276	up
NUP107	4.48474e-176	0.805727	0.551	0.11	8.7004e-172	0.441	ns
PKN2	5.9371e-176	0.964694	0.549	0.111	1.1518e-171	0.438	ns
FOS	7.80437e-176	1.68827	0.596	0.155	1.51405e-171	0.441	up
SVIL	8.35074e-176	3.3669	0.303	0.017	1.62004e-171	0.286	up
GBGT1	1.24103e-175	1.0599	0.492	0.088	2.4076e-171	0.404	up
LDLRAD4	1.4019e-175	2.81499	0.308	0.019	2.71969e-171	0.289	up
RAF1	1.4868e-175	0.841396	0.585	0.127	2.88439e-171	0.458	ns
TRABD2B	1.74274e-175	2.35295	0.367	0.04	3.38092e-171	0.327	up
HERC2	1.91715e-175	0.962112	0.745	0.211	3.71927e-171	0.534	ns
PIK3C2A	2.13392e-175	1.43331	0.463	0.076	4.13981e-171	0.387	up
CPSF6	2.20988e-175	0.926714	0.555	0.115	4.28717e-171	0.44	ns
GNA15	2.92501e-175	2.47951	0.316	0.021	5.67451e-171	0.295	up
NIPBL	3.05668e-175	1.08074	0.84	0.284	5.92996e-171	0.556	up
EIF4A2	3.34054e-175	1.10374	0.733	0.22	6.48064e-171	0.513	up
FAM135A	3.60057e-175	1.11869	0.499	0.091	6.98511e-171	0.408	up
ZFAND6	3.81433e-175	0.99214	0.671	0.173	7.3998e-171	0.498	ns
CEP295	3.95156e-175	0.94737	0.549	0.11	7.66602e-171	0.439	ns
NSRP1	3.9837e-175	0.818068	0.688	0.176	7.72838e-171	0.512	ns
SECISBP2	4.05333e-175	1.17983	0.455	0.072	7.86347e-171	0.383	up
CENPV	5.30803e-175	1.2649	0.429	0.061	1.02976e-170	0.368	up
FAM91A1	5.48486e-175	1.31468	0.388	0.046	1.06406e-170	0.342	up
CCAR1	5.69117e-175	0.882631	0.776	0.228	1.10409e-170	0.548	ns
HP1BP3	6.07981e-175	0.741052	0.585	0.126	1.17948e-170	0.459	ns
MUC1	6.60721e-175	2.25418	0.356	0.036	1.2818e-170	0.32	up
SH3GLB1	8.12411e-175	1.12174	0.54	0.109	1.57608e-170	0.431	up
SYNRG	8.1965e-175	0.968317	0.568	0.121	1.59012e-170	0.447	ns
CLYBL	8.32723e-175	1.41644	0.459	0.076	1.61548e-170	0.383	up
PRELID2	9.13736e-175	1.20894	0.547	0.115	1.77265e-170	0.432	up
TIMP3	9.92269e-175	5.23175	0.297	0.016	1.925e-170	0.281	up
INSIG1	1.14618e-174	2.39034	0.43	0.068	2.22359e-170	0.362	up
FEZ2	1.30912e-174	1.52633	0.387	0.046	2.53969e-170	0.341	up
LNX2	1.47029e-174	1.04621	0.565	0.121	2.85237e-170	0.444	up
EP400	1.56201e-174	0.719547	0.503	0.09	3.03031e-170	0.413	ns
P2RY1	1.60565e-174	2.73079	0.272	0.008	3.11496e-170	0.264	up
METTL16	1.73109e-174	1.29419	0.403	0.052	3.35831e-170	0.351	up
TOR1A	1.82825e-174	0.959707	0.491	0.086	3.5468e-170	0.405	ns
SYTL4	1.98173e-174	2.43681	0.313	0.02	3.84456e-170	0.293	up
SACM1L	2.404e-174	0.773641	0.604	0.136	4.66375e-170	0.468	ns
UBA6	2.45508e-174	1.13481	0.451	0.071	4.76286e-170	0.38	up
YPEL5	2.50977e-174	1.51462	0.353	0.034	4.86895e-170	0.319	up
SMC6	2.70163e-174	0.929731	0.596	0.133	5.24116e-170	0.463	ns
TMEM132A	4.08453e-174	1.21878	0.392	0.048	7.92399e-170	0.344	up
CHD1	4.47458e-174	0.772133	0.629	0.148	8.68068e-170	0.481	ns
UBXN2A	4.79255e-174	1.44835	0.36	0.036	9.29755e-170	0.324	up
ATG3	5.08031e-174	0.839451	0.625	0.148	9.85581e-170	0.477	ns
RBM41	5.79049e-174	1.52258	0.383	0.045	1.12335e-169	0.338	up
LSG1	5.99139e-174	1.1804	0.383	0.044	1.16233e-169	0.339	up
SLC19A3	8.08334e-174	3.11057	0.283	0.012	1.56817e-169	0.271	up
TCF7L1	8.33971e-174	1.24529	0.973	0.583	1.6179e-169	0.39	up
RB1CC1	8.50905e-174	1.0131	0.467	0.077	1.65076e-169	0.39	up
HIF1A	9.13433e-174	1.0393	0.65	0.165	1.77206e-169	0.485	up
ADM	1.03447e-173	2.69851	0.298	0.016	2.00688e-169	0.282	up
RNF144A	1.26201e-173	3.87619	0.278	0.01	2.44829e-169	0.268	up
NAP1L4	1.50472e-173	0.993294	0.689	0.183	2.91916e-169	0.506	ns
ZRANB1	1.55676e-173	1.71391	0.367	0.039	3.02012e-169	0.328	up
ZZZ3	1.84926e-173	0.924721	0.746	0.212	3.58757e-169	0.534	ns
UBR1	2.23369e-173	0.915877	0.772	0.225	4.33336e-169	0.547	ns
CTNND1	2.33e-173	1.17345	0.927	0.395	4.52019e-169	0.532	up
FAM234B	2.39232e-173	1.01925	0.613	0.143	4.6411e-169	0.47	up
SLC9A8	2.42028e-173	1.69195	0.333	0.027	4.69534e-169	0.306	up
TAB2	2.50042e-173	1.04408	0.469	0.078	4.85081e-169	0.391	up
WIPI2	2.61145e-173	1.1147	0.522	0.102	5.06622e-169	0.42	up
CABLES1	2.69916e-173	2.23394	0.349	0.034	5.23636e-169	0.315	up
SCAPER	3.78026e-173	1.14669	0.475	0.081	7.33371e-169	0.394	up
RNF2	4.12346e-173	1.18872	0.466	0.078	7.99952e-169	0.388	up
FRRS1	4.50882e-173	2.95665	0.282	0.011	8.74711e-169	0.271	up
APOA1	4.70288e-173	-2.31407	0.571	0.775	9.12359e-169	-0.204	down
FBXO30	5.23766e-173	2.69933	0.289	0.013	1.01611e-168	0.276	up
OSBPL8	5.68279e-173	1.34472	0.543	0.115	1.10246e-168	0.428	up
AKAP11	6.75986e-173	1.33342	0.46	0.077	1.31141e-168	0.383	up
NIPSNAP2	6.80593e-173	1.56253	0.356	0.036	1.32035e-168	0.32	up
CDYL	7.05088e-173	0.995787	0.631	0.152	1.36787e-168	0.479	ns
DDX5	1.01107e-172	1.25632	0.927	0.464	1.96147e-168	0.463	up
USP42	1.03458e-172	1.96419	0.329	0.027	2.00709e-168	0.302	up
ATG7	1.12177e-172	0.999729	0.655	0.167	2.17623e-168	0.488	ns
GOLGA1	1.1641e-172	1.57924	0.36	0.037	2.25836e-168	0.323	up
TMEM248	1.52163e-172	0.880411	0.508	0.095	2.95196e-168	0.413	ns
KHDRBS1	1.71916e-172	0.898632	0.531	0.105	3.33517e-168	0.426	ns
ATE1	1.7223e-172	0.992258	0.573	0.126	3.34126e-168	0.447	ns
BSDC1	1.83351e-172	1.61157	0.364	0.039	3.55702e-168	0.325	up
ENSBTAG00000034225	1.86871e-172	1.17098	0.412	0.056	3.6253e-168	0.356	up
SLC52A2	1.92434e-172	0.849381	0.571	0.123	3.73322e-168	0.448	ns
LEPROTL1	1.92452e-172	1.29529	0.432	0.065	3.73358e-168	0.367	up
CLN3	2.11986e-172	0.889156	0.619	0.146	4.11254e-168	0.473	ns
REPS2	2.25669e-172	3.1541	0.283	0.012	4.37798e-168	0.271	up
IRF2	2.44472e-172	3.41821	0.264	0.006	4.74275e-168	0.258	up
TTLL3	2.84578e-172	1.94593	0.324	0.025	5.52082e-168	0.299	up
TMEM50B	3.51552e-172	1.19688	0.813	0.28	6.82011e-168	0.533	up
PBX4	3.82823e-172	3.36988	0.275	0.01	7.42677e-168	0.265	up
DHX15	5.50058e-172	0.908596	0.544	0.111	1.06711e-167	0.433	ns
CRPPA	6.43583e-172	1.67421	0.51	0.103	1.24855e-167	0.407	up
UHRF2	7.20346e-172	1.19097	0.511	0.098	1.39747e-167	0.413	up
SLC30A9	7.36214e-172	0.946134	0.533	0.107	1.42825e-167	0.426	ns
CYTH3	7.62291e-172	1.61333	0.387	0.048	1.47884e-167	0.339	up
MVP	8.28403e-172	0.898063	0.449	0.071	1.6071e-167	0.378	ns
ZNF704	9.51706e-172	1.90218	0.419	0.062	1.84631e-167	0.357	up
WWC3	1.20558e-171	1.40884	0.859	0.32	2.33882e-167	0.539	up
QSOX1	1.38286e-171	1.8998	0.316	0.022	2.68275e-167	0.294	up
ANKRD10	1.75463e-171	0.999249	0.557	0.119	3.40399e-167	0.438	ns
WDR7	1.85248e-171	1.05923	0.525	0.104	3.59381e-167	0.421	up
PHF20	2.0161e-171	1.22646	0.481	0.086	3.91123e-167	0.395	up
FBXW2	2.13395e-171	1.07456	0.448	0.071	4.13986e-167	0.377	up
ERC2	2.76301e-171	1.75755	0.388	0.049	5.36024e-167	0.339	up
MAP2K4	3.02515e-171	0.889011	0.562	0.121	5.8688e-167	0.441	ns
EIF2AK3	3.08455e-171	1.33139	0.489	0.09	5.98403e-167	0.399	up
TDRD3	3.39402e-171	0.972292	0.494	0.09	6.5844e-167	0.404	ns
LNX1	3.82814e-171	2.17078	0.329	0.028	7.4266e-167	0.301	up
HACE1	3.8582e-171	1.58351	0.39	0.05	7.48491e-167	0.34	up
SFSWAP	4.008e-171	0.80893	0.516	0.098	7.77552e-167	0.418	ns
PIK3C3	5.70989e-171	0.981528	0.497	0.093	1.10772e-166	0.404	ns
ENSBTAG00000048386	6.38871e-171	1.34113	0.399	0.052	1.23941e-166	0.347	up
PPP2R2A	7.38887e-171	0.983549	0.779	0.239	1.43344e-166	0.54	ns
TET3	9.38139e-171	1.20288	0.509	0.099	1.81999e-166	0.41	up
KIF3A	9.71553e-171	1.46535	0.397	0.052	1.88481e-166	0.345	up
ERLIN2	9.95499e-171	0.865815	0.468	0.079	1.93127e-166	0.389	ns
MTURN	1.18091e-170	2.37037	0.301	0.018	2.29097e-166	0.283	up
PLXNB2	1.18743e-170	0.750195	0.576	0.125	2.30362e-166	0.451	ns
ZFYVE16	1.35775e-170	0.888815	0.474	0.081	2.63404e-166	0.393	ns
PHIP	1.60683e-170	0.905598	0.713	0.196	3.11724e-166	0.517	ns
BICRAL	1.85472e-170	1.90481	0.341	0.032	3.59815e-166	0.309	up
ZFAND5	2.06236e-170	1.07956	0.585	0.135	4.00098e-166	0.45	up
TRAPPC8	2.39086e-170	0.854865	0.595	0.136	4.63827e-166	0.459	ns
TAF4B	3.74075e-170	2.42865	0.317	0.024	7.25706e-166	0.293	up
ENSBTAG00000017734	4.14487e-170	1.03789	0.483	0.086	8.04106e-166	0.397	up
NVL	5.22363e-170	1.01165	0.451	0.073	1.01338e-165	0.378	up
ATG2B	6.61213e-170	1.76162	0.332	0.028	1.28275e-165	0.304	up
PLAC8A	1.01409e-169	-1.44545	0.497	0.842	1.96733e-165	-0.345	down
DDX6	1.06776e-169	0.781368	0.613	0.143	2.07145e-165	0.47	ns
SCARB2	1.29797e-169	1.14372	0.844	0.309	2.51805e-165	0.535	up
AFDN	1.31361e-169	1.1286	0.89	0.33	2.5484e-165	0.56	up
SHROOM1	2.28748e-169	2.75	0.279	0.012	4.43772e-165	0.267	up
DNAJB12	2.62721e-169	1.27305	0.347	0.034	5.09678e-165	0.313	up
MORF4L2	2.81538e-169	1.24775	0.849	0.326	5.46184e-165	0.523	up
CTSD	3.2499e-169	1.54887	0.755	0.263	6.3048e-165	0.492	up
PIGK	3.44065e-169	1.02429	0.439	0.068	6.67487e-165	0.371	up
REV1	3.69448e-169	1.37929	0.361	0.039	7.16729e-165	0.322	up
NAXD	3.97708e-169	1.08246	0.472	0.083	7.71553e-165	0.389	up
DNAJB6	4.03442e-169	1.18872	0.822	0.308	7.82678e-165	0.514	up
WBP1L	4.15494e-169	1.43415	0.413	0.06	8.06058e-165	0.353	up
TMEM135	4.32346e-169	1.08334	0.741	0.222	8.38752e-165	0.519	up
FLVCR2	4.74775e-169	1.08921	0.461	0.079	9.21064e-165	0.382	up
ATF4	5.36345e-169	1.20291	0.736	0.233	1.04051e-164	0.503	up
RNF149	5.5107e-169	1.28289	0.357	0.038	1.06908e-164	0.319	up
RNGTT	6.6514e-169	0.759889	0.629	0.152	1.29037e-164	0.477	ns
KIAA0930	7.06721e-169	2.76821	0.29	0.016	1.37104e-164	0.274	up
BZW2	7.50995e-169	1.19884	0.868	0.358	1.45693e-164	0.51	up
PARP6	7.56877e-169	1.90919	0.333	0.03	1.46834e-164	0.303	up
SPATA13	9.27412e-169	3.76662	0.267	0.009	1.79918e-164	0.258	up
CDKAL1	1.31661e-168	0.994666	0.694	0.191	2.55423e-164	0.503	ns
MB21D2	1.3419e-168	2.47023	0.329	0.029	2.60328e-164	0.3	up
COG3	1.8684e-168	1.05557	0.468	0.081	3.6247e-164	0.387	up
ATG10	2.02063e-168	1.58883	0.389	0.051	3.92002e-164	0.338	up
SYNJ1	2.46085e-168	1.01326	0.607	0.146	4.77405e-164	0.461	up
BRMS1L	2.87521e-168	1.34439	0.393	0.052	5.57791e-164	0.341	up
FAF2	2.909e-168	0.817719	0.526	0.105	5.64347e-164	0.421	ns
SLC36A2	3.11588e-168	4.88599	0.261	0.008	6.04481e-164	0.253	up
TBC1D22B	3.95917e-168	1.65379	0.333	0.03	7.68079e-164	0.303	up
SLC25A28	4.43748e-168	1.64251	0.355	0.038	8.6087e-164	0.317	up
PDZD8	4.51849e-168	1.18051	0.465	0.081	8.76588e-164	0.384	up
ABHD17B	4.82443e-168	0.858733	0.496	0.093	9.3594e-164	0.403	ns
LRRC63	5.21057e-168	4.5988	0.241	0.002	1.01085e-163	0.239	up
CMIP	5.33646e-168	1.39521	0.525	0.111	1.03527e-163	0.414	up
PIP5K1C	5.64277e-168	2.15674	0.321	0.026	1.0947e-163	0.295	up
MTFR1	7.74582e-168	1.09678	0.457	0.077	1.50269e-163	0.38	up
KDM6A	7.88404e-168	0.86967	0.759	0.224	1.5295e-163	0.535	ns
RCAN3	7.92568e-168	2.28707	0.302	0.02	1.53758e-163	0.282	up
POU2F1	9.76804e-168	1.30743	0.457	0.079	1.895e-163	0.378	up
RNF121	1.31272e-167	0.678647	0.619	0.146	2.54668e-163	0.473	ns
RBBP7	1.66303e-167	1.22038	0.831	0.329	3.22628e-163	0.502	up
LRRCC1	1.81462e-167	1.02731	0.399	0.054	3.52037e-163	0.345	up
EPHA2	2.01823e-167	3.37825	0.257	0.006	3.91537e-163	0.251	up
CPNE3	2.08196e-167	0.861396	0.567	0.125	4.039e-163	0.442	ns
VPS41	2.14646e-167	0.847497	0.536	0.11	4.16414e-163	0.426	ns
STK40	2.76066e-167	1.6768	0.399	0.056	5.35569e-163	0.343	up
ARID1B	2.89604e-167	1.03285	0.833	0.287	5.61831e-163	0.546	up
DOCK4	2.90635e-167	1.7139	0.799	0.315	5.63831e-163	0.484	up
SEMA4A	3.0905e-167	2.85757	0.285	0.015	5.99558e-163	0.27	up
DAZAP2	3.1819e-167	0.939743	0.461	0.079	6.17289e-163	0.382	ns
LNPEP	3.42869e-167	1.13035	0.414	0.06	6.65165e-163	0.354	up
RPS21	3.79031e-167	-1.24758	0.751	0.909	7.35319e-163	-0.158	down
WDSUB1	4.82349e-167	1.64239	0.365	0.042	9.35756e-163	0.323	up
KANSL3	4.83523e-167	1.03196	0.411	0.059	9.38036e-163	0.352	up
SCFD1	4.90114e-167	0.772029	0.561	0.121	9.50821e-163	0.44	ns
MPPE1	5.01806e-167	1.01348	0.716	0.208	9.73504e-163	0.508	up
ATP9B	5.40458e-167	0.867356	0.491	0.091	1.04849e-162	0.4	ns
PLEKHD1	5.66419e-167	3.63105	0.255	0.006	1.09885e-162	0.249	up
ARHGAP18	8.06655e-167	1.43108	0.431	0.068	1.56491e-162	0.363	up
SP3	8.83672e-167	1.40088	0.383	0.049	1.71432e-162	0.334	up
FEM1C	1.00123e-166	1.70146	0.328	0.029	1.94239e-162	0.299	up
SAFB	1.02665e-166	1.06679	0.793	0.26	1.99171e-162	0.533	up
ENSBTAG00000054228	1.05351e-166	2.78904	0.311	0.024	2.04381e-162	0.287	up
LAMA5	1.08733e-166	1.36096	0.361	0.04	2.10942e-162	0.321	up
JUNB	1.12664e-166	1.77351	0.445	0.078	2.18568e-162	0.367	up
RBMS1	1.14654e-166	1.18177	0.515	0.105	2.22428e-162	0.41	up
DNTTIP2	1.19965e-166	0.742445	0.525	0.105	2.32733e-162	0.42	ns
SH3BP1	1.30562e-166	1.74901	0.354	0.038	2.53289e-162	0.316	up
MAN2B1	1.31575e-166	1.11808	0.716	0.219	2.55256e-162	0.497	up
ZFX	1.47436e-166	0.809355	0.474	0.084	2.86027e-162	0.39	ns
MYO1C	1.65342e-166	1.32519	0.419	0.064	3.20763e-162	0.355	up
OTUD5	1.66841e-166	1.17333	0.415	0.061	3.23671e-162	0.354	up
ENSBTAG00000003661	1.7553e-166	0.980003	0.431	0.067	3.40529e-162	0.364	ns
EHD4	1.97376e-166	0.785506	0.515	0.101	3.82909e-162	0.414	ns
GAS6	2.86321e-166	1.26212	0.503	0.101	5.55462e-162	0.402	up
SDCBP	3.67557e-166	1.23413	0.757	0.242	7.13061e-162	0.515	up
IRF6	3.89454e-166	1.29606	0.396	0.054	7.55541e-162	0.342	up
NRIP1	4.92806e-166	1.94304	0.285	0.015	9.56044e-162	0.27	up
PLCXD2	7.01708e-166	2.47581	0.356	0.042	1.36131e-161	0.314	up
CHML	8.27996e-166	1.16781	0.357	0.039	1.60631e-161	0.318	up
MLXIPL	9.25699e-166	3.90789	0.248	0.004	1.79586e-161	0.244	up
ENSBTAG00000014449	9.80836e-166	2.95553	0.255	0.006	1.90282e-161	0.249	up
ELF2	1.05862e-165	0.819547	0.589	0.136	2.05373e-161	0.453	ns
S100PBP	1.21504e-165	1.01217	0.438	0.07	2.35718e-161	0.368	up
MAP2K5	1.22374e-165	0.912574	0.673	0.181	2.37406e-161	0.492	ns
ATP2B4	1.22822e-165	1.47904	0.435	0.071	2.38275e-161	0.364	up
KRCC1	1.47092e-165	1.06798	0.42	0.063	2.85359e-161	0.357	up
AKAP12	1.56717e-165	3.24986	0.285	0.016	3.04032e-161	0.269	up
OSGIN1	1.95353e-165	2.87402	0.293	0.018	3.78985e-161	0.275	up
MOB1A	1.95625e-165	1.59401	0.35	0.037	3.79512e-161	0.313	up
ZRANB2	2.15435e-165	0.907228	0.735	0.213	4.17944e-161	0.522	ns
VWA1	4.47224e-165	1.74492	0.303	0.021	8.67615e-161	0.282	up
TRIP4	5.09121e-165	1.00102	0.475	0.086	9.87694e-161	0.389	up
ARFGEF1	6.14044e-165	0.851001	0.749	0.22	1.19124e-160	0.529	ns
RNLS	6.17506e-165	1.31743	0.439	0.073	1.19796e-160	0.366	up
BACH1	7.28971e-165	1.72672	0.327	0.029	1.4142e-160	0.298	up
KIN	7.96993e-165	1.08278	0.401	0.056	1.54617e-160	0.345	up
ALDOC	9.40263e-165	1.6379	0.459	0.085	1.82411e-160	0.374	up
ODR4	1.03889e-164	0.848969	0.457	0.078	2.01545e-160	0.379	ns
ROGDI	1.05837e-164	1.21977	0.486	0.092	2.05324e-160	0.394	up
VMP1	1.13641e-164	1.13433	0.825	0.275	2.20464e-160	0.55	up
AGO2	1.31673e-164	1.63618	0.323	0.028	2.55445e-160	0.295	up
CEP83	1.31813e-164	0.728199	0.554	0.12	2.55718e-160	0.434	ns
PRKCG	1.59942e-164	0.975135	0.539	0.116	3.10287e-160	0.423	ns
CLASP2	1.8699e-164	0.769818	0.587	0.136	3.62761e-160	0.451	ns
VPS4B	2.23881e-164	0.739383	0.553	0.119	4.3433e-160	0.434	ns
CHMP2B	3.05033e-164	0.927034	0.502	0.098	5.91765e-160	0.404	ns
RMDN1	3.51152e-164	0.912464	0.486	0.091	6.81236e-160	0.395	ns
NR6A1	4.54592e-164	1.23466	0.91	0.385	8.81909e-160	0.525	up
SNX1	4.68773e-164	0.842514	0.668	0.178	9.09419e-160	0.49	ns
PTPRK	4.73666e-164	1.50252	0.968	0.508	9.18912e-160	0.46	up
SNX24	4.79841e-164	0.925246	0.698	0.195	9.30891e-160	0.503	ns
ATP5F1E	5.40669e-164	-1.63639	0.662	0.773	1.0489e-159	-0.111	ns
GOSR1	5.49353e-164	0.96743	0.526	0.11	1.06574e-159	0.416	ns
HTT	8.83177e-164	1.13524	0.405	0.058	1.71336e-159	0.347	up
RRAGC	9.2548e-164	0.863073	0.546	0.119	1.79543e-159	0.427	ns
BLOC1S6	9.77072e-164	1.2257	0.369	0.044	1.89552e-159	0.325	up
IRF7	1.3267e-163	2.41478	0.333	0.033	2.5738e-159	0.3	up
DUSP8	1.50991e-163	2.14469	0.295	0.019	2.92923e-159	0.276	up
ENSBTAG00000049906	1.53597e-163	4.30186	0.238	0.002	2.97977e-159	0.236	up
CDO1	1.9014e-163	1.93337	0.289	0.017	3.68872e-159	0.272	up
PLA2R1	2.4254e-163	1.02485	0.7	0.198	4.70527e-159	0.502	up
RAB5A	2.59166e-163	1.13363	0.467	0.084	5.02781e-159	0.383	up
HMBOX1	3.01684e-163	0.748628	0.758	0.221	5.85266e-159	0.537	ns
TRAF6	3.12837e-163	1.54667	0.335	0.033	6.06904e-159	0.302	up
NDST1	3.44917e-163	1.87612	0.328	0.031	6.69138e-159	0.297	up
DDIT3	3.94666e-163	1.83758	0.328	0.031	7.65651e-159	0.297	up
SCNN1A	5.18523e-163	1.42963	0.381	0.05	1.00593e-158	0.331	up
ERBIN	5.24519e-163	0.878282	0.674	0.181	1.01757e-158	0.493	ns
ALMS1	5.48445e-163	1.44181	0.407	0.061	1.06398e-158	0.346	up
EOGT	5.98739e-163	1.08719	0.405	0.059	1.16155e-158	0.346	up
SPECC1L	6.45241e-163	1.96085	0.316	0.027	1.25177e-158	0.289	up
BIRC2	6.65331e-163	1.07864	0.403	0.058	1.29074e-158	0.345	up
CEBPD	8.78125e-163	1.36531	0.68	0.216	1.70356e-158	0.464	up
PPARGC1B	1.10323e-162	1.23385	0.444	0.076	2.14027e-158	0.368	up
SLMAP	1.48977e-162	0.876337	0.804	0.26	2.89015e-158	0.544	ns
RPL37	1.6828e-162	-0.960036	0.766	0.966	3.26464e-158	-0.2	ns
APPL2	1.75537e-162	1.61553	0.345	0.037	3.40541e-158	0.308	up
FAM117B	1.90384e-162	2.92333	0.272	0.013	3.69344e-158	0.259	up
GOLGA7	1.92636e-162	0.962996	0.558	0.126	3.73714e-158	0.432	ns
RBM6	2.31902e-162	0.852761	0.7	0.196	4.4989e-158	0.504	ns
PEPD	2.39556e-162	1.04367	0.606	0.152	4.64738e-158	0.454	up
TEX10	2.41719e-162	0.815515	0.658	0.173	4.68934e-158	0.485	ns
SPP1	2.95449e-162	4.65607	0.233	0.001	5.73172e-158	0.232	up
DYNC1LI2	3.445e-162	0.592369	0.545	0.117	6.68331e-158	0.428	ns
EVA1B	3.72512e-162	1.36061	0.362	0.043	7.22673e-158	0.319	up
CNOT6	4.85347e-162	0.901465	0.447	0.076	9.41573e-158	0.371	ns
SLC22A23	5.00006e-162	0.86373	0.593	0.143	9.70012e-158	0.45	ns
EVI5	5.71438e-162	0.877679	0.749	0.226	1.10859e-157	0.523	ns
SEC24B	5.91035e-162	1.45364	0.353	0.04	1.14661e-157	0.313	up
ACTR10	6.3988e-162	0.866111	0.454	0.079	1.24137e-157	0.375	ns
ADAM17	8.22594e-162	1.93698	0.336	0.034	1.59583e-157	0.302	up
HAUS4	8.89767e-162	1.13477	0.428	0.069	1.72615e-157	0.359	up
CSTF3	9.20262e-162	0.912522	0.528	0.112	1.78531e-157	0.416	ns
PPP1R2	9.2432e-162	1.03001	0.411	0.062	1.79318e-157	0.349	up
HPS5	1.15406e-161	0.851324	0.431	0.069	2.23888e-157	0.362	ns
RPL24	1.17567e-161	-0.907576	0.803	0.98	2.28081e-157	-0.177	ns
PDPN	1.1915e-161	2.46951	0.397	0.062	2.31152e-157	0.335	up
RREB1	1.27172e-161	0.687827	0.666	0.174	2.46714e-157	0.492	ns
SPINT1	1.51341e-161	1.01542	0.632	0.166	2.93601e-157	0.466	up
BAZ1A	1.62559e-161	0.999904	0.737	0.223	3.15365e-157	0.514	ns
RAB8B	1.65349e-161	1.1991	0.491	0.098	3.20776e-157	0.393	up
PATL1	1.67613e-161	0.908457	0.483	0.092	3.2517e-157	0.391	ns
RPL13	3.07106e-161	-0.885582	0.813	0.977	5.95785e-157	-0.164	ns
ABHD13	4.21721e-161	1.29528	0.337	0.034	8.18138e-157	0.303	up
NIPA2	4.74519e-161	1.02896	0.41	0.062	9.20566e-157	0.348	up
KLF10	5.05117e-161	1.40088	0.413	0.065	9.79927e-157	0.348	up
TBC1D10B	5.58577e-161	0.827206	0.533	0.114	1.08364e-156	0.419	ns
ERCC6	5.85227e-161	3.03969	0.265	0.011	1.13534e-156	0.254	up
ZNRF2	6.41312e-161	0.887799	0.511	0.105	1.24414e-156	0.406	ns
GCNT1	6.47285e-161	1.17698	0.747	0.241	1.25573e-156	0.506	up
TOR3A	7.55485e-161	0.996677	0.409	0.061	1.46564e-156	0.348	ns
PTS	8.30071e-161	1.63217	0.315	0.027	1.61034e-156	0.288	up
GPR89A	8.36041e-161	1.04866	0.401	0.058	1.62192e-156	0.343	up
PITPNM2	8.81507e-161	3.16504	0.288	0.019	1.71012e-156	0.269	up
HEATR5A	1.04042e-160	0.731401	0.524	0.108	2.01842e-156	0.416	ns
PHF20L1	1.17013e-160	0.926375	0.457	0.082	2.27005e-156	0.375	ns
ZNF207	1.32149e-160	0.79154	0.755	0.228	2.56369e-156	0.527	ns
FGD6	1.40829e-160	1.18298	0.423	0.068	2.73208e-156	0.355	up
MAPK1IP1L	1.5658e-160	0.743641	0.647	0.167	3.03765e-156	0.48	ns
TLCD3A	1.89087e-160	1.38107	0.325	0.03	3.6683e-156	0.295	up
WBP4	2.53045e-160	0.811072	0.607	0.151	4.90907e-156	0.456	ns
NIN	2.5718e-160	1.37877	0.39	0.055	4.98929e-156	0.335	up
PI4KB	2.91954e-160	1.08495	0.415	0.065	5.66392e-156	0.35	up
RC3H1	3.29439e-160	0.991345	0.874	0.318	6.39112e-156	0.556	ns
KDM4B	3.68173e-160	1.26157	0.393	0.056	7.14256e-156	0.337	up
MAEA	3.93398e-160	0.969072	0.433	0.072	7.63192e-156	0.361	ns
PALS1	4.14494e-160	1.29132	0.761	0.247	8.04118e-156	0.514	up
PLCB4	4.65483e-160	2.88717	0.261	0.01	9.03037e-156	0.251	up
GGNBP2	4.86482e-160	0.618029	0.595	0.141	9.43775e-156	0.454	ns
MED6	1.03484e-159	0.914595	0.47	0.088	2.0076e-155	0.382	ns
WDR44	1.07933e-159	1.08499	0.485	0.095	2.0939e-155	0.39	up
TBRG1	1.18806e-159	0.801714	0.453	0.08	2.30484e-155	0.373	ns
SRC	1.44002e-159	1.50144	0.353	0.041	2.79364e-155	0.312	up
JARID2	1.52104e-159	1.17041	0.695	0.204	2.95081e-155	0.491	up
WHRN	1.65883e-159	2.58225	0.298	0.023	3.21812e-155	0.275	up
RPL8	1.79362e-159	-0.975178	0.809	0.988	3.47962e-155	-0.179	ns
TMEM116	1.96155e-159	3.4938	0.25	0.007	3.8054e-155	0.243	up
MAP4K5	2.15572e-159	0.782291	0.568	0.131	4.18209e-155	0.437	ns
PAPSS1	2.16344e-159	0.850757	0.438	0.073	4.19708e-155	0.365	ns
RBM39	2.32331e-159	1.05887	0.843	0.319	4.50721e-155	0.524	up
CALCRL	2.59198e-159	1.2997	0.473	0.092	5.02844e-155	0.381	up
GOLPH3L	4.29308e-159	1.02101	0.497	0.1	8.32857e-155	0.397	up
FBXO9	4.84247e-159	0.933629	0.454	0.082	9.39439e-155	0.372	ns
LTA4H	5.51831e-159	1.98813	0.402	0.064	1.07055e-154	0.338	up
SRSF10	7.87825e-159	0.895783	0.746	0.229	1.52838e-154	0.517	ns
SUMF1	8.34167e-159	1.13386	0.324	0.031	1.61828e-154	0.293	up
BPNT2	8.50207e-159	0.920872	0.432	0.072	1.6494e-154	0.36	ns
PTBP3	8.77834e-159	1.03916	0.452	0.081	1.703e-154	0.371	up
LUC7L3	1.16829e-158	1.05429	0.83	0.293	2.26648e-154	0.537	up
ENSBTAG00000013214	1.26978e-158	7.52742	0.227	0.001	2.46337e-154	0.226	up
MINDY2	1.71546e-158	0.756323	0.57	0.131	3.32799e-154	0.439	ns
PREP	1.72058e-158	0.888094	0.531	0.116	3.33793e-154	0.415	ns
DGAT1	1.82372e-158	0.960626	0.438	0.074	3.53801e-154	0.364	ns
PCSK7	2.09145e-158	0.7409	0.477	0.091	4.05742e-154	0.386	ns
CYP20A1	2.18143e-158	0.845511	0.473	0.089	4.23198e-154	0.384	ns
CDK6	2.2194e-158	2.47614	0.339	0.038	4.30564e-154	0.301	up
FKBP15	2.382e-158	1.25071	0.372	0.049	4.62109e-154	0.323	up
UXS1	2.61665e-158	0.635185	0.535	0.116	5.0763e-154	0.419	ns
ICE1	2.74245e-158	0.642088	0.521	0.109	5.32035e-154	0.412	ns
NCOA1	2.83254e-158	0.817819	0.553	0.125	5.49514e-154	0.428	ns
EYA3	2.84121e-158	0.973569	0.48	0.093	5.51196e-154	0.387	ns
TSG101	3.33327e-158	0.734105	0.527	0.113	6.46654e-154	0.414	ns
ERGIC1	3.49355e-158	0.985654	0.695	0.2	6.77749e-154	0.495	ns
EMC3	4.05212e-158	0.822217	0.611	0.155	7.86111e-154	0.456	ns
ATP5MF	4.72139e-158	-1.44447	0.681	0.787	9.1595e-154	-0.106	ns
TSC22D4	4.79266e-158	1.13622	0.4	0.06	9.29776e-154	0.34	up
SLC16A13	5.39133e-158	2.48562	0.262	0.011	1.04592e-153	0.251	up
SAMD8	6.64675e-158	1.11373	0.447	0.08	1.28947e-153	0.367	up
SIPA1L3	6.93493e-158	0.785838	0.511	0.106	1.34538e-153	0.405	ns
KBTBD6	8.09891e-158	3.97321	0.225	0.001	1.57119e-153	0.224	up
SBF2	8.61675e-158	1.1315	0.854	0.316	1.67165e-153	0.538	up
TADA3	1.05919e-157	1.58221	0.365	0.048	2.05483e-153	0.317	up
MLXIP	1.24141e-157	1.47161	0.456	0.087	2.40833e-153	0.369	up
TFCP2L1	1.38532e-157	1.12614	0.503	0.106	2.68752e-153	0.397	up
COL1A2	1.40681e-157	1.9254	0.424	0.074	2.72921e-153	0.35	up
SMAD4	1.51538e-157	0.65487	0.575	0.135	2.93983e-153	0.44	ns
PEX7	1.70546e-157	1.54257	0.329	0.034	3.30859e-153	0.295	up
EPS15L1	2.07797e-157	1.13558	0.424	0.07	4.03126e-153	0.354	up
PPP4R2	2.08642e-157	0.725046	0.695	0.194	4.04765e-153	0.501	ns
VASP	2.29495e-157	1.02483	0.749	0.25	4.4522e-153	0.499	up
RRN3	2.3141e-157	1.59168	0.323	0.031	4.48936e-153	0.292	up
GON4L	2.55097e-157	0.796252	0.429	0.071	4.94887e-153	0.358	ns
AKIRIN1	2.79547e-157	0.86839	0.456	0.083	5.42322e-153	0.373	ns
MOB3B	2.82813e-157	1.08548	0.637	0.172	5.48658e-153	0.465	up
DCP2	3.07896e-157	0.801575	0.507	0.105	5.97319e-153	0.402	ns
MAPK14	3.50404e-157	0.880737	0.659	0.179	6.79784e-153	0.48	ns
SIN3A	3.51584e-157	1.09754	0.391	0.057	6.82074e-153	0.334	up
ENSBTAG00000048707	6.18049e-157	1.90835	0.294	0.022	1.19901e-152	0.272	up
ENSBTAG00000048782	6.58574e-157	2.3791	0.615	0.187	1.27763e-152	0.428	up
TSC22D1	7.46754e-157	1.47022	0.429	0.076	1.4487e-152	0.353	up
RABEP2	7.57883e-157	1.91565	0.332	0.036	1.47029e-152	0.296	up
SKI	7.79707e-157	1.95371	0.295	0.022	1.51263e-152	0.273	up
IKZF5	7.88165e-157	1.68173	0.292	0.021	1.52904e-152	0.271	up
CYFIP1	8.28547e-157	0.694345	0.713	0.203	1.60738e-152	0.51	ns
PLCD3	8.30232e-157	1.17617	0.38	0.053	1.61065e-152	0.327	up
IKBIP	9.34136e-157	1.06617	0.363	0.046	1.81222e-152	0.317	up
LAMP2	1.01556e-156	1.24054	0.779	0.323	1.97019e-152	0.456	up
CBR4	1.03391e-156	0.679461	0.462	0.085	2.00578e-152	0.377	ns
MBP	1.40537e-156	0.783456	0.467	0.088	2.72642e-152	0.379	ns
RYK	1.48368e-156	0.827977	0.558	0.129	2.87833e-152	0.429	ns
MGMT	1.60285e-156	1.35934	0.425	0.073	3.10952e-152	0.352	up
USPL1	1.91837e-156	1.95168	0.291	0.021	3.72163e-152	0.27	up
PCM1	1.98343e-156	0.707123	0.465	0.086	3.84786e-152	0.379	ns
CACUL1	1.99711e-156	1.27548	0.37	0.049	3.87439e-152	0.321	up
GABPB1	2.0943e-156	1.58419	0.35	0.042	4.06294e-152	0.308	up
GPATCH2L	2.67155e-156	1.40459	0.351	0.042	5.18281e-152	0.309	up
TMEM109	2.75666e-156	1.097	0.396	0.059	5.34792e-152	0.337	up
USP54	2.86468e-156	2.48644	0.291	0.022	5.55747e-152	0.269	up
VDR	2.90305e-156	2.72588	0.271	0.015	5.63191e-152	0.256	up
PTEN	2.91048e-156	0.81827	0.459	0.084	5.64633e-152	0.375	ns
PARM1	2.96507e-156	2.76178	0.303	0.026	5.75223e-152	0.277	up
SRP54	3.06663e-156	0.703648	0.455	0.081	5.94926e-152	0.374	ns
EXOC6	3.47235e-156	0.966708	0.439	0.077	6.73635e-152	0.362	ns
DENND2D	3.69627e-156	1.26729	0.355	0.043	7.17077e-152	0.312	up
YPEL2	3.72118e-156	1.10437	0.589	0.149	7.21908e-152	0.44	up
TCERG1	3.84152e-156	0.49875	0.614	0.15	7.45255e-152	0.464	ns
ALG9	4.57529e-156	0.675759	0.493	0.099	8.87607e-152	0.394	ns
ARHGAP21	6.47946e-156	0.913006	0.701	0.204	1.25702e-151	0.497	ns
B4GALNT2	6.51982e-156	4.97844	0.225	0.002	1.26485e-151	0.223	up
ATG14	8.27288e-156	1.40666	0.338	0.037	1.60494e-151	0.301	up
FOXN2	9.42609e-156	1.12643	0.435	0.076	1.82866e-151	0.359	up
RB1	1.01308e-155	1.97808	0.287	0.02	1.96538e-151	0.267	up
CBLC	1.08534e-155	1.10903	0.443	0.079	2.10556e-151	0.364	up
CDC42EP4	1.1001e-155	1.126	0.37	0.049	2.13419e-151	0.321	up
NOCT	1.12863e-155	1.49454	0.367	0.049	2.18954e-151	0.318	up
ZNF655	1.16923e-155	1.08678	0.4	0.061	2.26832e-151	0.339	up
PAG7	1.40236e-155	3.59281	0.236	0.005	2.72058e-151	0.231	up
ITGB5	1.49494e-155	1.7358	0.333	0.036	2.90018e-151	0.297	up
CDC6	1.5032e-155	0.734399	0.529	0.116	2.91621e-151	0.413	ns
STOX2	1.53377e-155	1.01063	0.595	0.151	2.97551e-151	0.444	up
CFAP70	1.70235e-155	2.17708	0.272	0.015	3.30256e-151	0.257	up
MAL2	1.70863e-155	1.25919	0.469	0.093	3.31475e-151	0.376	up
COMMD3	1.73088e-155	0.815285	0.629	0.165	3.35792e-151	0.464	ns
RNF10	2.50561e-155	0.812074	0.754	0.236	4.86088e-151	0.518	ns
YY1	2.52708e-155	0.522205	0.646	0.166	4.90254e-151	0.48	ns
TGM2	3.04203e-155	2.71938	0.357	0.049	5.90153e-151	0.308	up
MPZL1	3.06571e-155	0.886218	0.508	0.108	5.94748e-151	0.4	ns
LPIN2	3.71486e-155	1.06386	0.457	0.086	7.20683e-151	0.371	up
EDRF1	4.73301e-155	0.785572	0.369	0.049	9.18204e-151	0.32	ns
VTI1A	4.7458e-155	0.908467	0.685	0.198	9.20686e-151	0.487	ns
PLK2	5.4561e-155	3.02657	0.259	0.012	1.05848e-150	0.247	up
NT5DC3	6.00875e-155	1.4072	0.444	0.082	1.1657e-150	0.362	up
NCOR1	6.7141e-155	0.809623	0.831	0.276	1.30254e-150	0.555	ns
PCGF3	6.95215e-155	1.35427	0.374	0.052	1.34872e-150	0.322	up
GPAT3	7.53628e-155	1.29599	0.785	0.273	1.46204e-150	0.512	up
CAB39L	8.3834e-155	0.847372	0.613	0.16	1.62638e-150	0.453	ns
ZFP36	8.54458e-155	1.90972	0.413	0.072	1.65765e-150	0.341	up
TRIM25	8.84805e-155	1.03879	0.657	0.188	1.71652e-150	0.469	up
UBAP2L	9.49113e-155	0.902148	0.537	0.121	1.84128e-150	0.416	ns
NFX1	1.00844e-154	0.78245	0.688	0.194	1.95637e-150	0.494	ns
ANKRD44	1.35453e-154	1.55445	0.35	0.043	2.62778e-150	0.307	up
ULK4	1.50723e-154	2.62889	0.318	0.033	2.92402e-150	0.285	up
LRRC1	1.56946e-154	0.80652	0.605	0.155	3.04476e-150	0.45	ns
ENSBTAG00000054986	1.88847e-154	1.62927	0.326	0.034	3.66363e-150	0.292	up
RRBP1	1.89668e-154	0.890189	0.791	0.267	3.67957e-150	0.524	ns
MICU2	2.36274e-154	0.613769	0.539	0.119	4.58372e-150	0.42	ns
USP38	2.41214e-154	1.4473	0.327	0.034	4.67956e-150	0.293	up
ACP2	2.92436e-154	1.47126	0.293	0.022	5.67326e-150	0.271	up
PPP1CB	3.14698e-154	0.979759	0.828	0.299	6.10514e-150	0.529	ns
TLE5	3.69182e-154	1.49539	0.329	0.035	7.16213e-150	0.294	up
SLC30A1	4.40788e-154	1.29662	0.327	0.034	8.55129e-150	0.293	up
AXIN1	4.46366e-154	0.881342	0.414	0.067	8.6595e-150	0.347	ns
ATF6B	4.52334e-154	1.32596	0.327	0.034	8.77528e-150	0.293	up
FAM120A	4.80456e-154	0.836941	0.765	0.241	9.32084e-150	0.524	ns
GNAI3	5.07786e-154	0.861632	0.695	0.204	9.85105e-150	0.491	ns
ANK3	5.21209e-154	1.23119	0.375	0.052	1.01115e-149	0.323	up
PBRM1	5.26568e-154	0.557155	0.641	0.166	1.02154e-149	0.475	ns
SLC25A46	6.38383e-154	1.35239	0.323	0.033	1.23846e-149	0.29	up
RP2	6.43483e-154	1.5014	0.332	0.036	1.24836e-149	0.296	up
NECTIN3	6.62168e-154	0.967523	0.657	0.187	1.28461e-149	0.47	ns
GALNT12	1.11645e-153	1.2548	0.455	0.087	2.16592e-149	0.368	up
PRKX	1.1597e-153	1.37877	0.347	0.042	2.24982e-149	0.305	up
TTC3	1.29724e-153	0.786843	0.666	0.185	2.51665e-149	0.481	ns
NIPAL3	1.41435e-153	1.31773	0.359	0.047	2.74384e-149	0.312	up
RPL10	1.46213e-153	-1.00269	0.82	0.988	2.83653e-149	-0.168	down
RNF20	1.58624e-153	0.835551	0.401	0.062	3.07731e-149	0.339	ns
STAT1	1.59194e-153	2.52989	0.271	0.016	3.08836e-149	0.255	up
C8G	1.67694e-153	3.09659	0.248	0.009	3.25326e-149	0.239	up
SNX30	1.74907e-153	0.88418	0.511	0.11	3.3932e-149	0.401	ns
EZH2	2.15639e-153	0.864308	0.595	0.151	4.18339e-149	0.444	ns
SLX4IP	3.05969e-153	1.03812	0.416	0.069	5.93579e-149	0.347	up
MICALL1	3.22845e-153	1.31323	0.395	0.062	6.26319e-149	0.333	up
SMAD3	3.24946e-153	3.56081	0.242	0.007	6.30395e-149	0.235	up
ZFP57	3.38587e-153	1.87255	0.287	0.021	6.56859e-149	0.266	up
AKTIP	4.8205e-153	0.87409	0.42	0.07	9.35178e-149	0.35	ns
EP300	5.3662e-153	0.600223	0.681	0.187	1.04104e-148	0.494	ns
ADAM10	8.06239e-153	1.07336	0.841	0.315	1.5641e-148	0.526	up
GRB2	8.37516e-153	0.850776	0.702	0.209	1.62478e-148	0.493	ns
TRA2B	8.39899e-153	0.920789	0.793	0.268	1.6294e-148	0.525	ns
GNL3L	8.52887e-153	0.803789	0.509	0.108	1.6546e-148	0.401	ns
SERPINB5	9.63559e-153	2.52732	0.293	0.024	1.8693e-148	0.269	up
UBXN7	9.83434e-153	1.21633	0.375	0.054	1.90786e-148	0.321	up
GAS7	1.18766e-152	1.10546	0.584	0.152	2.30407e-148	0.432	up
GSE1	1.3521e-152	1.71867	0.309	0.029	2.62308e-148	0.28	up
ABHD5	1.65509e-152	1.7663	0.393	0.063	3.21087e-148	0.33	up
GNAL	2.06448e-152	0.847418	0.46	0.088	4.0051e-148	0.372	ns
BTBD3	2.13369e-152	1.00969	0.409	0.066	4.13935e-148	0.343	up
SUN1	2.13556e-152	2.10723	0.267	0.015	4.14298e-148	0.252	up
SPG21	2.39304e-152	1.15509	0.341	0.04	4.64249e-148	0.301	up
BCL2L1	2.67549e-152	1.48477	0.347	0.043	5.19044e-148	0.304	up
KCTD11	3.02226e-152	1.38926	0.373	0.053	5.86319e-148	0.32	up
BTAF1	3.2072e-152	1.10673	0.367	0.05	6.22198e-148	0.317	up
C23H6orf62	3.33423e-152	0.886656	0.441	0.08	6.46841e-148	0.361	ns
PLAA	3.50529e-152	0.594272	0.443	0.079	6.80026e-148	0.364	ns
PELP1	3.67583e-152	1.32752	0.437	0.081	7.13111e-148	0.356	up
SHC1	3.85551e-152	0.676546	0.553	0.128	7.47969e-148	0.425	ns
RPL7A	5.12281e-152	-0.874447	0.82	0.992	9.93826e-148	-0.172	ns
SLC4A4	5.12723e-152	4.87832	0.231	0.005	9.94682e-148	0.226	up
NCOR2	6.97413e-152	0.611851	0.505	0.106	1.35298e-147	0.399	ns
EBAG9	7.54327e-152	0.774398	0.367	0.05	1.46339e-147	0.317	ns
NEDD4L	1.04006e-151	1.13434	0.866	0.339	2.01771e-147	0.527	up
ITPR2	1.05565e-151	1.8978	0.388	0.062	2.04797e-147	0.326	up
TOM1	1.46368e-151	0.661344	0.535	0.121	2.83954e-147	0.414	ns
TCN2	1.48771e-151	1.47995	0.339	0.041	2.88616e-147	0.298	up
CTSL	1.59151e-151	2.16846	0.861	0.801	3.08753e-147	0.06	ns
DPF2	1.60316e-151	0.699452	0.489	0.1	3.11014e-147	0.389	ns
YES1	1.94588e-151	0.857064	0.801	0.273	3.77501e-147	0.528	ns
TTC39B	2.75394e-151	2.16083	0.305	0.029	5.34265e-147	0.276	up
ACO1	3.16154e-151	0.697186	0.593	0.149	6.13339e-147	0.444	ns
HBG	3.7066e-151	5.79072	0.215	0.001	7.1908e-147	0.214	up
DIAPH2	4.89883e-151	1.78703	0.314	0.032	9.50373e-147	0.282	up
FOSB	4.97181e-151	2.01717	0.367	0.055	9.64531e-147	0.312	up
BAZ1B	6.02163e-151	0.479033	0.603	0.15	1.1682e-146	0.453	ns
ARHGEF7	1.09499e-150	1.46517	0.295	0.025	2.12428e-146	0.27	up
CNOT1	1.19692e-150	0.629215	0.726	0.214	2.32202e-146	0.512	ns
ADARB1	1.56346e-150	2.94803	0.261	0.014	3.03311e-146	0.247	up
PPFIBP2	1.568e-150	0.819612	0.667	0.19	3.04192e-146	0.477	ns
ZNF395	1.62286e-150	1.68296	0.335	0.04	3.14834e-146	0.295	up
TNFAIP8	1.64053e-150	2.09865	0.297	0.026	3.18262e-146	0.271	up
RPL36A	1.65503e-150	-1.50992	0.644	0.771	3.21076e-146	-0.127	ns
RUFY3	1.70664e-150	1.23661	0.404	0.067	3.31088e-146	0.337	up
DNAJC25	1.7281e-150	0.596442	0.463	0.089	3.35252e-146	0.374	ns
COBLL1	1.85476e-150	1.08796	0.523	0.12	3.59823e-146	0.403	up
VAMP4	1.97116e-150	1.21432	0.376	0.055	3.82405e-146	0.321	up
MAGI3	2.11338e-150	0.920029	0.789	0.264	4.09996e-146	0.525	ns
SLC29A2	2.26601e-150	1.51667	0.328	0.037	4.39606e-146	0.291	up
EED	2.4199e-150	0.956358	0.479	0.099	4.6946e-146	0.38	ns
DNAAF9	2.50617e-150	2.54548	0.29	0.024	4.86196e-146	0.266	up
UBXN4	2.64614e-150	0.810101	0.622	0.166	5.13351e-146	0.456	ns
DUSP6	2.75036e-150	2.31542	0.301	0.028	5.33569e-146	0.273	up
NTAN1	3.48208e-150	0.726193	0.515	0.113	6.75523e-146	0.402	ns
ENSBTAG00000050122	3.97289e-150	1.79512	0.344	0.044	7.70741e-146	0.3	up
GALK2	4.07498e-150	1.26828	0.391	0.061	7.90546e-146	0.33	up
NR3C1	4.2467e-150	2.34328	0.283	0.022	8.23859e-146	0.261	up
N4BP2L1	4.59958e-150	1.33546	0.377	0.056	8.92318e-146	0.321	up
TOX4	5.22333e-150	0.81221	0.405	0.065	1.01333e-145	0.34	ns
[truncated: 17,401 more rows]

## Sheet: Four_vs_Third
gene	p_val	avg_log2FC	pct.1	pct.2	p_val_adj	Difference	change
CSTB.1	0	-3.63007	0.179	0.775	0	-0.596	down
PTTG1IP	0	-3.34574	0.302	0.837	0	-0.535	down
ATP5PF	0	-2.57056	0.122	0.663	0	-0.541	down
PLCL2	0	2.73834	0.891	0.537	0	0.354	up
NAALADL2	0	1.91523	0.963	0.886	0	0.077	ns
RPL24	0	-3.23117	0.365	0.803	0	-0.438	down
WWTR1	0	1.88814	0.932	0.789	0	0.143	ns
SLC9A9	0	4.25949	0.819	0.173	0	0.646	up
ARMCX3	0	-3.59526	0.013	0.46	0	-0.447	down
SLC25A5	0	-3.7381	0.05	0.614	0	-0.564	down
RPL39	0	-4.21889	0.143	0.739	0	-0.596	down
POLA1	0	3.25531	0.845	0.611	0	0.234	up
RPS4X	0	-3.55001	0.309	0.795	0	-0.486	down
TMSB4X	0	-3.64279	0.261	0.866	0	-0.605	down
NDUFB11	0	-2.90626	0.054	0.58	0	-0.526	down
SSR4	0	-3.41564	0.228	0.756	0	-0.528	down
RPL10	0	-3.59981	0.375	0.82	0	-0.445	down
PLP2	0	-3.28955	0.079	0.651	0	-0.572	down
MARCKSL1	0	-4.71714	0.016	0.559	0	-0.543	down
SERINC2	0	-2.77783	0.178	0.843	0	-0.665	down
FMNL2	0	1.88523	0.979	0.921	0	0.058	ns
SH3BGRL3	0	-3.45208	0.107	0.718	0	-0.611	down
ATP5MC3	0	-3.38138	0.163	0.729	0	-0.566	down
HSPE1	0	-2.56642	0.219	0.759	0	-0.54	down
EEF1B2	0	-3.51952	0.132	0.704	0	-0.572	down
TMBIM1	0	-2.47067	0.148	0.722	0	-0.574	down
TSPAN1	0	-5.44187	0.022	0.693	0	-0.671	down
RPS8	0	-3.5021	0.479	0.867	0	-0.388	down
TMEM125	0	-2.73028	0.044	0.565	0	-0.521	down
LAMTOR2	0	-2.84998	0.052	0.576	0	-0.524	down
SSR2	0	-2.61126	0.193	0.731	0	-0.538	down
RAB13	0	-2.45139	0.076	0.613	0	-0.537	down
S100A14	0	-2.62843	0.261	0.817	0	-0.556	down
S100A2	0	-3.98316	0.168	0.816	0	-0.648	down
BCAR3	0	-4.66793	0.021	0.625	0	-0.604	down
S100A11	0	-3.2044	0.249	0.833	0	-0.584	down
S100A10	0	-3.36687	0.177	0.76	0	-0.583	down
GNG5	0	-2.43646	0.181	0.738	0	-0.557	down
ATP1A1	0	-2.19022	0.152	0.745	0	-0.593	down
PATJ	0	1.91514	0.923	0.85	0	0.073	ns
ATP5MC2	0	-2.87162	0.093	0.633	0	-0.54	down
KRT18	0	-4.44905	0.116	0.71	0	-0.594	down
KRT8	0	-3.9976	0.228	0.872	0	-0.644	down
ENSBTAG00000002355	0	-4.85468	0.013	0.591	0	-0.578	down
FKBP11	0	-3.27451	0.032	0.542	0	-0.51	down
RAC2	0	-5.54519	0.011	0.613	0	-0.602	down
TPI1	0	-3.26461	0.108	0.7	0	-0.592	down
GAPDH	0	-3.38807	0.346	0.841	0	-0.495	down
NACA	0	-2.7307	0.29	0.784	0	-0.494	down
EPS8	0	1.70493	0.968	0.805	0	0.163	up
CSRP2	0	-4.18141	0.046	0.643	0	-0.597	down
TOMM22	0	-2.88914	0.054	0.59	0	-0.536	down
RPL3	0	-3.13109	0.285	0.768	0	-0.483	down
NAGA	0	-3.6698	0.042	0.597	0	-0.555	down
TSPO	0	-4.02404	0.041	0.587	0	-0.546	down
NDUFA4	0	-3.32368	0.192	0.733	0	-0.541	down
ATP6V1F	0	-3.52093	0.061	0.637	0	-0.576	down
ZYX	0	-2.45346	0.176	0.799	0	-0.623	down
IMMP2L	0	1.85335	0.961	0.923	0	0.038	ns
SNX10	0	-2.49738	0.098	0.697	0	-0.599	down
CYCS	0	-2.73834	0.077	0.605	0	-0.528	down
PLAC8A	0	-7.45631	0.005	0.497	0	-0.492	down
RPL34	0	-3.27029	0.317	0.797	0	-0.48	down
RPL9	0	-3.4321	0.275	0.781	0	-0.506	down
APBB2	0	2.11938	0.933	0.854	0	0.079	ns
SULT1E1	0	3.18708	0.877	0.444	0	0.433	up
ANXA5	0	-2.23057	0.213	0.836	0	-0.623	down
DAPK1	0	3.34141	0.908	0.599	0	0.309	up
CTSL	0	-3.96228	0.411	0.861	0	-0.45	down
RPS6	0	-3.3045	0.309	0.785	0	-0.476	down
KANK1	0	2.9921	0.858	0.361	0	0.497	up
TXN	0	-2.95439	0.152	0.716	0	-0.564	down
ANXA1	0	-2.7655	0.35	0.903	0	-0.553	down
SEC61B	0	-2.98283	0.128	0.697	0	-0.569	down
RPS7	0	-3.21171	0.35	0.823	0	-0.473	down
CTSB	0	-2.97474	0.261	0.847	0	-0.586	down
CDC42SE2	0	1.87356	0.918	0.863	0	0.055	ns
ADGRE5	0	-3.26039	0.03	0.543	0	-0.513	down
RPS14	0	-3.46089	0.426	0.843	0	-0.417	down
CALR	0	-3.1192	0.374	0.824	0	-0.45	down
MAN2B1	0	-3.19765	0.079	0.716	0	-0.637	down
HAND1	0	-2.46998	0.196	0.757	0	-0.561	down
RPS23	0	-3.47883	0.28	0.783	0	-0.503	down
RACK1	0	-3.06345	0.316	0.791	0	-0.475	down
BSG	0	-3.37813	0.27	0.814	0	-0.544	down
ATP5F1D	0	-3.59049	0.086	0.673	0	-0.587	down
UQCR11	0	-3.1087	0.115	0.65	0	-0.535	down
GLRX	0	-3.06228	0.095	0.654	0	-0.559	down
NDUFA13	0	-3.29655	0.05	0.609	0	-0.559	down
NDUFA2	0	-2.97599	0.043	0.569	0	-0.526	down
EFNA5	0	1.94176	0.982	0.911	0	0.071	ns
NDUFA11	0	-3.42879	0.053	0.581	0	-0.528	down
RPL36	0	-2.92569	0.28	0.769	0	-0.489	down
UBA52	0	-3.19557	0.477	0.858	0	-0.381	down
PLIN3	0	-4.19229	0.02	0.56	0	-0.54	down
CIST1	0	-4.2562	0.01	0.453	0	-0.443	down
IFI30	0	-3.85945	0.033	0.537	0	-0.504	down
RPL18A	0	-3.60657	0.33	0.811	0	-0.481	down
TIMM13	0	-2.85859	0.042	0.54	0	-0.498	down
OAZ1	0	-2.82879	0.112	0.673	0	-0.561	down
ODC1	0	-5.2454	0.022	0.483	0	-0.461	down
RPS27A	0	-3.55599	0.392	0.829	0	-0.437	down
RPL35	0	-3.12181	0.334	0.797	0	-0.463	down
HSPA5	0	-3.33685	0.176	0.771	0	-0.595	down
RPL12	0	-4.17183	0.235	0.783	0	-0.548	down
BBLN	0	-3.73225	0.041	0.597	0	-0.556	down
RNF181	0	-2.44139	0.073	0.603	0	-0.53	down
CAPG	0	-6.63102	0.006	0.429	0	-0.423	down
FNBP1	0	-3.25067	0.101	0.825	0	-0.724	down
TMSB10	0	-2.7893	0.953	0.99	0	-0.037	ns
RPL7A	0	-3.44041	0.398	0.82	0	-0.422	down
EDF1	0	-2.7195	0.091	0.633	0	-0.542	down
COX5B	0	-3.18939	0.149	0.705	0	-0.556	down
DTNB	0	4.25786	0.787	0.253	0	0.534	up
NPAS2	0	-3.26748	0.387	0.814	0	-0.427	down
FHL2	0	-4.28677	0.023	0.591	0	-0.568	down
COX7A2L	0	-2.66788	0.09	0.621	0	-0.531	down
RPS12	0	-3.90069	0.475	0.838	0	-0.363	down
PERP	0	-2.72598	0.122	0.669	0	-0.547	down
NHSL1	0	2.82969	0.962	0.637	0	0.325	up
MTHFD1L	0	5.96199	0.699	0.043	0	0.656	up
ENSBTAG00000004472	0	-2.87479	0.033	0.525	0	-0.492	down
EEF1A1	0	-3.50541	0.462	0.851	0	-0.389	down
COX7A2	0	-3.10107	0.147	0.705	0	-0.558	down
PKIB	0	-4.102	0.05	0.711	0	-0.661	down
ENSBTAG00000025385	0	-4.16124	0.043	0.613	0	-0.57	down
LHFPL2	0	-3.89848	0.03	0.577	0	-0.547	down
FOS	0	-3.33433	0.048	0.596	0	-0.548	down
RPLP1	0	-3.33529	0.436	0.841	0	-0.405	down
CALM1	0	-2.55488	0.449	0.876	0	-0.427	down
PPIB	0	-2.8043	0.254	0.769	0	-0.515	down
TLN2	0	2.19569	0.928	0.615	0	0.313	up
ENSBTAG00000048782	0	-4.89393	0.039	0.615	0	-0.576	down
B2M	0	-5.34996	0.04	0.641	0	-0.601	down
PSMB5	0	-3.30588	0.071	0.645	0	-0.574	down
GCNT3	0	-2.58394	0.086	0.629	0	-0.543	down
SAP18	0	-2.74091	0.089	0.645	0	-0.556	down
TPT1	0	-4.02352	0.393	0.885	0	-0.492	down
MRPL17	0	-3.01869	0.04	0.535	0	-0.495	down
ARHGAP42	0	-3.75708	0.05	0.665	0	-0.615	down
RPS3	0	-3.31025	0.272	0.769	0	-0.497	down
MAML2	0	1.8294	0.949	0.683	0	0.266	up
APOA1	0	-4.06765	0.015	0.571	0	-0.556	down
ATP5MG	0	-3.27025	0.184	0.719	0	-0.535	down
RPS13	0	-3.51617	0.272	0.777	0	-0.505	down
TEAD1	0	2.48916	0.981	0.865	0	0.116	ns
RPL27A	0	-3.18071	0.418	0.823	0	-0.405	down
ATP5F1E	0	-2.84688	0.121	0.662	0	-0.541	down
TKDP1	0	-10.0397	0.006	0.482	0	-0.476	down
TKDP4	0	-8.6649	0.013	0.621	0	-0.608	down
CALML5	0	-4.70185	0.062	0.681	0	-0.619	down
PPDPF	0	-3.17867	0.045	0.571	0	-0.526	down
CA2	0	-3.43436	0.047	0.545	0	-0.498	down
CEBPD	0	-2.53623	0.108	0.68	0	-0.572	down
RPL7	0	-3.33692	0.309	0.781	0	-0.472	down
STAU2	0	2.72815	0.89	0.647	0	0.243	up
RPL8	0	-3.57146	0.337	0.809	0	-0.472	down
FABP5	0	-3.11845	0.488	0.91	0	-0.422	down
RPL30	0	-3.29751	0.31	0.783	0	-0.473	down
ENSBTAG00000016347	0	-3.25003	0.085	0.661	0	-0.576	down
AGTRAP	0	-2.21787	0.118	0.681	0	-0.563	down
TMEM9	0	-2.6773	0.052	0.571	0	-0.519	down
SHISA4	0	-3.11178	0.025	0.521	0	-0.496	down
PTGS2	0	-3.50326	0.072	0.795	0	-0.723	down
PEBP1	0	-3.43447	0.057	0.613	0	-0.556	down
RPL6	0	-3.38048	0.362	0.823	0	-0.461	down
RPLP0	0	-4.15155	0.304	0.812	0	-0.508	down
COX6A1	0	-2.86994	0.153	0.697	0	-0.544	down
UQCR10	0	-2.86173	0.114	0.651	0	-0.537	down
CHCHD10	0	-3.33605	0.065	0.619	0	-0.554	down
GGT1	0	-3.94885	0.02	0.557	0	-0.537	down
SLC7A4	0	-7.94489	0.006	0.607	0	-0.601	down
RPS3A	0	-3.52693	0.364	0.822	0	-0.458	down
LRBA	0	1.56626	0.965	0.953	0	0.012	ns
RAPGEF2	0	1.52535	0.973	0.943	0	0.03	ns
ARPC3	0	-2.47074	0.144	0.706	0	-0.562	down
RPL37	0	-3.41725	0.261	0.766	0	-0.505	down
BASP1	0	-5.87663	0.024	0.623	0	-0.599	down
IRX4	0	-3.67052	0.015	0.508	0	-0.493	down
NDUFS6	0	-2.69264	0.092	0.637	0	-0.545	down
BTF3	0	-3.097	0.143	0.697	0	-0.554	down
FURIN	0	-2.5928	0.214	0.804	0	-0.59	down
CKB	0	-3.1672	0.068	0.615	0	-0.547	down
ATP5MJ	0	-3.01785	0.104	0.651	0	-0.547	down
MESD	0	-2.68589	0.065	0.588	0	-0.523	down
COX5A	0	-2.81225	0.153	0.693	0	-0.54	down
CKMT1A	0	-2.61252	0.171	0.757	0	-0.586	down
SERF2	0	-2.71803	0.263	0.789	0	-0.526	down
PSMD8	0	-2.71462	0.066	0.586	0	-0.52	down
APRT	0	-3.21779	0.066	0.628	0	-0.562	down
RPL13	0	-2.86756	0.374	0.813	0	-0.439	down
RPL28	0	-3.55276	0.313	0.795	0	-0.482	down
FTO	0	2.34223	0.952	0.819	0	0.133	ns
BCAM	0	-2.33668	0.358	0.824	0	-0.466	down
TMEM160	0	-2.75983	0.055	0.582	0	-0.527	down
KDELR1	0	-2.76703	0.102	0.659	0	-0.557	down
RPL18	0	-3.29782	0.399	0.819	0	-0.42	down
FTL	0	-3.42135	0.243	0.818	0	-0.575	down
COX6B1	0	-3.0318	0.105	0.647	0	-0.542	down
RPL13A	0	-3.38983	0.38	0.825	0	-0.445	down
RPS11	0	-3.45107	0.327	0.813	0	-0.486	down
NME2	0	-3.75569	0.109	0.714	0	-0.605	down
P4HB	0	-2.33326	0.299	0.812	0	-0.513	down
ACTG1	0	-2.37898	0.69	0.943	0	-0.253	down
ATP5MC1	0	-3.44039	0.099	0.652	0	-0.553	down
RPL23	0	-3.30385	0.401	0.821	0	-0.42	down
RPL19	0	-3.19377	0.282	0.787	0	-0.505	down
KRT19	0	-3.89668	0.328	0.912	0	-0.584	down
EIF1	0	-2.85032	0.217	0.781	0	-0.564	down
TXNDC17	0	-3.84736	0.018	0.499	0	-0.481	down
C1QBP	0	-3.12247	0.049	0.571	0	-0.522	down
PFN1	0	-4.1611	0.223	0.771	0	-0.548	down
PSMB6	0	-3.01706	0.066	0.599	0	-0.533	down
GABARAP	0	-2.75999	0.184	0.719	0	-0.535	down
EIF5A	0	-3.25301	0.103	0.68	0	-0.577	down
ATP5PD	0	-3.25664	0.111	0.683	0	-0.572	down
RPL26	0	-3.00121	0.263	0.772	0	-0.509	down
UBB	0	-2.02466	0.593	0.945	0	-0.352	down
TANC2	0	2.38654	0.939	0.501	0	0.438	up
PTPRM	0	2.25358	0.934	0.788	0	0.146	ns
RPL29	0	-3.6273	0.261	0.771	0	-0.51	down
MANF	0	-2.91088	0.101	0.665	0	-0.564	down
RPL14	0	-3.46793	0.322	0.803	0	-0.481	down
TOMM6	0	-2.73591	0.093	0.644	0	-0.551	down
HSP90AB1	0	-2.51061	0.474	0.877	0	-0.403	down
PLA2G7	0	-2.64473	0.16	0.762	0	-0.602	down
CLIC1	0	-3.12747	0.13	0.73	0	-0.6	down
IER3	0	-2.84653	0.1	0.675	0	-0.575	down
HMGA1	0	-3.15616	0.068	0.581	0	-0.513	down
RPS10	0	-3.18591	0.422	0.829	0	-0.407	down
RBP4	0	-4.12371	0.014	0.504	0	-0.49	down
SLC25A6	0	-3.50748	0.232	0.769	0	-0.537	down
NDUFB8	0	-2.81722	0.138	0.703	0	-0.565	down
FUOM	0	-3.18064	0.034	0.541	0	-0.507	down
FGFR2	0	2.18641	0.925	0.791	0	0.134	ns
PAG12	0	-3.91491	0.106	0.767	0	-0.661	down
PAG11	0	-4.57782	0.277	0.878	0	-0.601	down
FTH1	0	-3.82326	0.358	0.842	0	-0.484	down
EEF1G	0	-2.95955	0.276	0.766	0	-0.49	down
PRDX5	0	-3.33077	0.144	0.722	0	-0.578	down
FAU	0	-3.57666	0.263	0.777	0	-0.514	down
CFL1	0	-2.81924	0.203	0.722	0	-0.519	down
FXYD4	0	-3.17547	0.125	0.693	0	-0.568	down
MCU	0	2.22177	0.927	0.752	0	0.175	up
PRXL2A	0	-4.20959	0.157	0.799	0	-0.642	down
ENSBTAG00000050611	0	-3.54734	0.21	0.822	0	-0.612	down
RBPMS	0	-4.13374	0.045	0.733	0	-0.688	down
CHCHD2	0	-3.14599	0.133	0.709	0	-0.576	down
NDUFB10	0	-2.85142	0.1	0.672	0	-0.572	down
RPS2	0	-3.54789	0.485	0.863	0	-0.378	down
CLDN6	0	-5.97893	0.013	0.592	0	-0.579	down
MDH2	0	-2.82444	0.119	0.68	0	-0.561	down
HSPB1	0	-3.70958	0.215	0.807	0	-0.592	down
ACTB	0	-2.95906	0.753	0.943	0	-0.19	down
ND1	0	-3.43215	0.168	0.788	0	-0.62	down
ND2	0	-3.29581	0.18	0.781	0	-0.601	down
COX1	0	-3.32571	0.337	0.827	0	-0.49	down
COX2	0	-3.2826	0.28	0.817	0	-0.537	down
ATP6	0	-3.04447	0.237	0.806	0	-0.569	down
COX3	0	-3.15686	0.344	0.826	0	-0.482	down
ND3	0	-3.23433	0.201	0.783	0	-0.582	down
ND4L	0	-3.2613	0.042	0.636	0	-0.594	down
ND4	0	-3.34536	0.195	0.8	0	-0.605	down
ND5	0	-3.35493	0.087	0.743	0	-0.656	down
ND6	0	-3.95012	0.023	0.592	0	-0.569	down
CYTB	0	-3.5707	0.191	0.791	0	-0.6	down
CASK	8.38389e-308	2.83492	0.811	0.319	1.62647e-303	0.492	up
SYNE2	9.70857e-308	1.88568	0.921	0.839	1.88346e-303	0.082	ns
RPL38	2.42249e-307	-2.9954	0.262	0.758	4.69964e-303	-0.496	down
ATP5MF	3.32223e-307	-2.8225	0.152	0.681	6.44513e-303	-0.529	down
ARHGDIB	3.97875e-307	-2.09952	0.309	0.829	7.71878e-303	-0.52	down
SFN	5.04909e-307	-2.80818	0.077	0.605	9.79523e-303	-0.528	down
SMCO4	1.25769e-306	-3.35429	0.022	0.476	2.43992e-302	-0.454	down
ATP5MK	9.57346e-306	-2.53732	0.105	0.647	1.85725e-301	-0.542	down
EIF3F	1.0862e-305	-2.60685	0.059	0.565	2.10723e-301	-0.506	down
NCOA2	2.1847e-305	1.58551	0.96	0.901	4.23831e-301	0.059	ns
LAMTOR1	1.08775e-304	-2.61299	0.074	0.595	2.11024e-300	-0.521	down
POLR2G	1.62942e-304	-2.89786	0.041	0.525	3.16107e-300	-0.484	down
MRPL11	1.87854e-304	-2.74105	0.056	0.559	3.64437e-300	-0.503	down
PGAM1	2.24675e-304	-2.39718	0.088	0.631	4.35869e-300	-0.543	down
LRPAP1	2.79479e-304	-2.29258	0.137	0.693	5.42189e-300	-0.556	down
SRP14	5.17348e-304	-2.88978	0.038	0.52	1.00365e-299	-0.482	down
RPL35A	6.03486e-304	-3.13948	0.337	0.781	1.17076e-299	-0.444	down
MGAT5	1.33372e-303	2.69204	0.847	0.603	2.58741e-299	0.244	up
RPL10A	1.38004e-303	-2.9533	0.405	0.824	2.67728e-299	-0.419	down
RPS5	2.68782e-303	-3.37755	0.41	0.812	5.21436e-299	-0.402	down
RPL5	6.2011e-303	-2.69897	0.369	0.809	1.20301e-298	-0.44	down
NDUFA1	7.87993e-303	-2.7191	0.054	0.553	1.52871e-298	-0.499	down
RPS25	1.80769e-302	-2.92081	0.309	0.771	3.50691e-298	-0.462	down
RPS20	3.28178e-302	-3.23921	0.431	0.827	6.36665e-298	-0.396	down
DLG1	3.43579e-302	1.77155	0.923	0.837	6.66542e-298	0.086	ns
BAG3	1.53294e-301	-4.14819	0.016	0.453	2.9739e-297	-0.437	down
CNN3	2.36311e-301	-3.40636	0.026	0.481	4.58443e-297	-0.455	down
RNASET2	2.78284e-301	-2.37763	0.088	0.631	5.39871e-297	-0.543	down
CXADR	3.12756e-301	-2.26338	0.29	0.853	6.06748e-297	-0.563	down
RPL27	6.0566e-301	-2.77516	0.326	0.783	1.17498e-296	-0.457	down
DBNDD2	6.88883e-301	-4.66424	0.005	0.416	1.33643e-296	-0.411	down
PABPC1	8.25777e-301	-1.8825	0.7	0.95	1.60201e-296	-0.25	down
UBL5	8.44605e-301	-2.51487	0.105	0.635	1.63853e-296	-0.53	down
PRDX6	1.04578e-300	-2.64525	0.051	0.549	2.02882e-296	-0.498	down
UQCRH	1.09094e-300	-2.49352	0.241	0.75	2.11642e-296	-0.509	down
RPL22L1	1.14872e-300	-3.15755	0.05	0.536	2.22851e-296	-0.486	down
ENSBTAG00000018987	1.73679e-300	-2.67139	0.026	0.485	3.36937e-296	-0.459	down
PTGR1	2.72754e-300	-2.96583	0.055	0.549	5.29143e-296	-0.494	down
NDUFA7	4.02215e-300	-2.40104	0.087	0.617	7.80297e-296	-0.53	down
RPS27	4.26794e-300	-3.346	0.342	0.78	8.27981e-296	-0.438	down
PHPT1	4.74367e-300	-2.55285	0.069	0.584	9.20272e-296	-0.515	down
RPS16	1.46371e-299	-2.76181	0.273	0.758	2.8396e-295	-0.485	down
BRI3	1.71227e-299	-2.45466	0.093	0.623	3.3218e-295	-0.53	down
RPL32	4.99207e-299	-3.05706	0.4	0.81	9.68462e-295	-0.41	down
NUCB2	6.68769e-299	-2.89506	0.046	0.529	1.29741e-294	-0.483	down
UQCRFS1	1.50814e-298	-2.43679	0.095	0.626	2.9258e-294	-0.531	down
RPS18	3.63883e-298	-3.35173	0.484	0.834	7.05933e-294	-0.35	down
SBF2	4.75148e-298	1.76911	0.929	0.854	9.21788e-294	0.075	ns
EEF1D	6.37396e-298	-2.71714	0.172	0.695	1.23655e-293	-0.523	down
H3-3B	7.25079e-298	-2.31829	0.254	0.771	1.40665e-293	-0.517	down
PSENEN	1.15207e-297	-2.63287	0.047	0.537	2.23502e-293	-0.49	down
RPS17	1.38181e-297	-2.88723	0.257	0.749	2.6807e-293	-0.492	down
SLC44A4	2.10743e-297	-4.55227	0.006	0.416	4.08841e-293	-0.41	down
ATP5IF1	4.95769e-297	-2.47384	0.138	0.673	9.61791e-293	-0.535	down
TMEM147	1.47553e-296	-2.55367	0.084	0.601	2.86253e-292	-0.517	down
PDIA3	3.19585e-296	-2.33688	0.273	0.769	6.19995e-292	-0.496	down
ENSBTAG00000005495	5.7738e-296	-4.20546	0.011	0.43	1.12012e-291	-0.419	down
OSTC	7.43624e-296	-2.43484	0.089	0.621	1.44263e-291	-0.532	down
STXBP6	8.11592e-296	2.50536	0.803	0.276	1.57449e-291	0.527	up
RAB25	3.36763e-295	-2.55457	0.088	0.611	6.5332e-291	-0.523	down
RPS29	4.82842e-295	-2.9598	0.379	0.806	9.36713e-291	-0.427	down
SPNS1	6.25061e-295	-2.114	0.162	0.733	1.21262e-290	-0.571	down
MRPL57	9.10124e-295	-2.32297	0.071	0.585	1.76564e-290	-0.514	down
RPS28	5.32536e-294	-3.11813	0.459	0.835	1.03312e-289	-0.376	down
ELL2	5.40488e-294	-2.21666	0.134	0.716	1.04855e-289	-0.582	down
SVIL	5.78086e-294	3.17326	0.777	0.303	1.12149e-289	0.474	up
ZC3H10	1.16189e-293	-3.43777	0.573	0.875	2.25407e-289	-0.302	down
MFGE8	2.29443e-293	-2.06614	0.315	0.841	4.4512e-289	-0.526	down
CUTA	3.66835e-293	-2.13656	0.097	0.637	7.11659e-289	-0.54	down
FADS1	4.46975e-293	-3.7593	0.048	0.517	8.67132e-289	-0.469	down
DDOST	1.17363e-292	-2.25805	0.184	0.725	2.27684e-288	-0.541	down
COMMD4	1.42698e-292	-2.50528	0.048	0.532	2.76834e-288	-0.484	down
PACSIN2	6.29195e-292	1.42401	0.958	0.931	1.22064e-287	0.027	ns
RAB5IF	7.88556e-292	-2.30119	0.126	0.663	1.5298e-287	-0.537	down
NAP1L1	1.2668e-291	-3.01036	0.034	0.494	2.45759e-287	-0.46	down
IRX3	2.69314e-291	-3.69214	0.011	0.427	5.22469e-287	-0.416	down
VIPR2	3.71131e-291	-2.83634	0.055	0.543	7.19994e-287	-0.488	down
PDIA6	4.69132e-291	-2.13894	0.202	0.75	9.10117e-287	-0.548	down
PSMG4	5.64226e-291	-2.40405	0.072	0.582	1.0946e-286	-0.51	down
RPS26	1.11362e-290	-2.8123	0.235	0.741	2.16042e-286	-0.506	down
LMNA	1.37881e-290	-2.14007	0.148	0.703	2.67488e-286	-0.555	down
SNRPD3	2.06643e-290	-2.4394	0.164	0.684	4.00888e-286	-0.52	down
HRAS	2.69228e-290	-2.22513	0.052	0.543	5.22301e-286	-0.491	down
RANBP1	3.47062e-290	-2.48355	0.103	0.628	6.733e-286	-0.525	down
SLC8A1	4.33062e-290	2.22933	0.873	0.459	8.40141e-286	0.414	up
CMIP	6.91444e-290	-3.2149	0.048	0.525	1.3414e-285	-0.477	down
RPS21	9.05028e-290	-2.73701	0.274	0.751	1.75575e-285	-0.477	down
NME1	2.59056e-289	-2.69174	0.04	0.509	5.02568e-285	-0.469	down
NDUFB9	5.06036e-289	-2.63192	0.057	0.544	9.81709e-285	-0.487	down
NDUFB7	6.65449e-289	-2.33417	0.089	0.609	1.29097e-284	-0.52	down
ENSBTAG00000040602	7.26394e-289	-2.48293	0.217	0.722	1.4092e-284	-0.505	down
SDF2L1	1.10528e-288	-2.41504	0.068	0.572	2.14424e-284	-0.504	down
TOMM5	1.30724e-288	-2.33457	0.084	0.599	2.53604e-284	-0.515	down
ALDOC	1.9284e-288	-3.34602	0.023	0.459	3.74109e-284	-0.436	down
CUX1	2.305e-288	2.0849	0.884	0.787	4.4717e-284	0.097	ns
CSNK2B	2.34254e-288	-2.39589	0.074	0.581	4.54452e-284	-0.507	down
RPS9	4.07794e-288	-3.15543	0.426	0.808	7.9112e-284	-0.382	down
CDKN1A	8.28369e-288	-2.90135	0.036	0.495	1.60704e-283	-0.459	down
NDUFS5	1.01536e-287	-2.29544	0.092	0.611	1.96979e-283	-0.519	down
RPL36AL	1.13537e-287	-2.36971	0.27	0.765	2.20263e-283	-0.495	down
SSLP1	1.43978e-287	-2.67219	0.729	0.914	2.79318e-283	-0.185	down
REEP1	1.60235e-287	-2.62426	0.046	0.527	3.10855e-283	-0.481	down
ALYREF	2.31443e-287	-2.41708	0.095	0.617	4.48999e-283	-0.522	down
FADD	2.38786e-287	-2.3392	0.067	0.572	4.63245e-283	-0.505	down
UQCRQ	8.47734e-287	-2.51667	0.098	0.617	1.6446e-282	-0.519	down
FN1	3.4581e-286	-3.65046	0.015	0.435	6.70872e-282	-0.42	down
TCAF2	5.11696e-286	-4.46798	0.01	0.414	9.92691e-282	-0.404	down
DYRK1A	1.98729e-285	1.64282	0.92	0.859	3.85534e-281	0.061	ns
RPS4Y1	2.70455e-285	-2.42716	0.075	0.579	5.24683e-281	-0.504	down
WWC2	2.74053e-285	2.5573	0.855	0.647	5.31663e-281	0.208	up
AMDHD2	6.19814e-285	-2.08847	0.237	0.766	1.20244e-280	-0.529	down
SNRPD2	1.86035e-284	-2.4862	0.105	0.616	3.60908e-280	-0.511	down
TTC39B	2.48312e-284	3.48194	0.75	0.305	4.81725e-280	0.445	up
PSMA7	3.15007e-284	-2.44755	0.179	0.693	6.11113e-280	-0.514	down
RPL36A	4.39886e-284	-2.69892	0.13	0.644	8.53379e-280	-0.514	down
ISYNA1	1.01951e-283	-3.44733	0.041	0.499	1.97785e-279	-0.458	down
MRPL20	2.15453e-283	-2.37981	0.07	0.569	4.17979e-279	-0.499	down
UFC1	3.4991e-283	-2.25202	0.087	0.605	6.78825e-279	-0.518	down
CHCHD1	4.03509e-283	-2.33554	0.043	0.512	7.82807e-279	-0.469	down
TXNDC5	6.53396e-283	-2.02273	0.09	0.615	1.26759e-278	-0.525	down
C7H19orf53	7.25029e-283	-3.06093	0.021	0.447	1.40656e-278	-0.426	down
CD63	7.33015e-283	-2.2804	0.451	0.835	1.42205e-278	-0.384	down
C24H18orf32	9.32201e-283	-2.16619	0.071	0.575	1.80847e-278	-0.504	down
PAG8	1.87958e-282	-2.78545	0.62	0.904	3.64639e-278	-0.284	down
PRDX1	3.66414e-282	-3.16979	0.263	0.745	7.10843e-278	-0.482	down
NDUFB5	5.79234e-282	-2.40746	0.113	0.632	1.12371e-277	-0.519	down
AHCY	8.94989e-282	-2.22474	0.094	0.612	1.73628e-277	-0.518	down
MRPL41	1.01117e-281	-2.31155	0.105	0.625	1.96168e-277	-0.52	down
PARK7	1.39403e-281	-2.41569	0.135	0.655	2.70441e-277	-0.52	down
DPM2	2.77501e-281	-2.6626	0.038	0.493	5.38352e-277	-0.455	down
LGMN	8.58565e-281	-3.65405	0.046	0.505	1.66562e-276	-0.459	down
NOTCH2	2.26335e-280	-3.02665	0.042	0.499	4.3909e-276	-0.457	down
PIN1	3.87575e-280	-2.22962	0.094	0.611	7.51895e-276	-0.517	down
HSP90B1	7.61876e-280	-2.34311	0.303	0.774	1.47804e-275	-0.471	down
SMDT1	8.79235e-280	-2.15285	0.068	0.566	1.70572e-275	-0.498	down
EIF6	4.41088e-279	-2.3276	0.056	0.537	8.55711e-275	-0.481	down
PFDN5	5.1842e-279	-2.08777	0.103	0.629	1.00573e-274	-0.526	down
EIF1AX	6.37385e-279	-2.20807	0.128	0.655	1.23653e-274	-0.527	down
INPP5F	9.6644e-279	-3.6128	0.021	0.439	1.87489e-274	-0.418	down
PSMB4	2.16674e-278	-2.25485	0.129	0.651	4.20347e-274	-0.522	down
RPL37A	4.27454e-278	-2.80353	0.397	0.803	8.2926e-274	-0.406	down
LAMTOR5	5.02562e-278	-2.00555	0.082	0.598	9.74971e-274	-0.516	down
PRDX2	5.18532e-278	-2.21099	0.203	0.724	1.00595e-273	-0.521	down
SORBS2	6.70696e-278	-2.75473	0.061	0.544	1.30115e-273	-0.483	down
ATP6V0B	7.53271e-278	-2.1527	0.207	0.733	1.46134e-273	-0.526	down
ARPC2	7.94751e-278	-1.55206	0.533	0.913	1.54182e-273	-0.38	down
ATOX1	1.08704e-277	-2.51471	0.109	0.622	2.10887e-273	-0.513	down
ITGB2	1.38527e-277	-5.88709	0.003	0.383	2.68743e-273	-0.38	down
TAF10	5.16089e-277	-2.16773	0.12	0.643	1.00121e-272	-0.523	down
ATP5ME	6.13376e-277	-2.67391	0.131	0.646	1.18995e-272	-0.515	down
TKDP2	1.64752e-276	-9.19019	0.005	0.386	3.19619e-272	-0.381	down
ANXA8L1	1.70427e-276	-1.87377	0.3	0.845	3.30628e-272	-0.545	down
BICD1	2.13308e-276	-3.11109	0.031	0.469	4.13818e-272	-0.438	down
LGALS3BP	3.24005e-276	-3.70385	0.042	0.483	6.2857e-272	-0.441	down
TMED9	3.34835e-276	-2.07342	0.151	0.693	6.4958e-272	-0.542	down
COPS9	3.66477e-276	-2.3341	0.092	0.598	7.10965e-272	-0.506	down
RPL4	3.79676e-276	-2.32648	0.297	0.765	7.36572e-272	-0.468	down
ATP6AP1	3.82744e-276	-2.06131	0.126	0.663	7.42523e-272	-0.537	down
SF3B5	4.41858e-276	-2.2274	0.052	0.525	8.57204e-272	-0.473	down
FARP1	5.55352e-276	1.99309	0.884	0.783	1.07738e-271	0.101	ns
SLCO1C1	2.21038e-275	7.17436	0.57	0.007	4.28813e-271	0.563	up
PLIN2	6.52338e-275	-3.08175	0.032	0.466	1.26554e-270	-0.434	down
DBI	6.64961e-275	-2.58782	0.269	0.731	1.29002e-270	-0.462	down
SPCS1	7.06498e-275	-2.3	0.051	0.521	1.37061e-270	-0.47	down
BAG1	1.02074e-274	-2.55766	0.04	0.492	1.98024e-270	-0.452	down
PSAP	2.04558e-274	-2.04195	0.254	0.8	3.96843e-270	-0.546	down
IMPA2	2.11235e-274	-2.23324	0.069	0.561	4.09797e-270	-0.492	down
ECHS1	7.53865e-274	-2.60548	0.025	0.451	1.4625e-269	-0.426	down
MICOS13	1.16298e-273	-2.2404	0.109	0.623	2.25618e-269	-0.514	down
NDUFS2	1.64805e-273	-2.25166	0.092	0.599	3.19721e-269	-0.507	down
COX8A	1.76231e-273	-2.26371	0.139	0.659	3.41888e-269	-0.52	down
TP53I13	1.97529e-273	-3.01676	0.021	0.438	3.83206e-269	-0.417	down
TP53I3	3.24277e-273	-3.00071	0.028	0.455	6.29098e-269	-0.427	down
LTBP1	4.16528e-273	2.5485	0.789	0.305	8.08064e-269	0.484	up
POMP	4.48472e-273	-2.11824	0.189	0.713	8.70036e-269	-0.524	down
FBL	1.46019e-272	-2.30187	0.092	0.595	2.83277e-268	-0.503	down
KRT7	1.88175e-272	-5.14497	0.007	0.388	3.65059e-268	-0.381	down
FAM32A	1.94318e-272	-2.31196	0.047	0.509	3.76977e-268	-0.462	down
POLR2F	2.33112e-272	-2.16681	0.052	0.521	4.52237e-268	-0.469	down
EFHD2	6.02033e-272	-1.79913	0.207	0.779	1.16794e-267	-0.572	down
VSIG10L	8.59778e-272	-2.27302	0.111	0.623	1.66797e-267	-0.512	down
RPLP2	1.00673e-271	-2.789	0.441	0.814	1.95306e-267	-0.373	down
NDUFS7	1.51045e-271	-2.10894	0.104	0.617	2.93027e-267	-0.513	down
SLC16A9	1.55832e-271	-6.9584	0.002	0.372	3.02313e-267	-0.37	down
ARPC4	2.03606e-271	-2.08424	0.194	0.717	3.94996e-267	-0.523	down
MRPL27	2.49266e-271	-2.20955	0.079	0.574	4.83576e-267	-0.495	down
TMEM258	2.78152e-271	-2.21145	0.091	0.599	5.39615e-267	-0.508	down
ABCB11	6.91078e-271	-3.70252	0.031	0.458	1.34069e-266	-0.427	down
ROMO1	6.99649e-271	-2.63749	0.066	0.542	1.35732e-266	-0.476	down
RTRAF	8.47065e-271	-2.20405	0.129	0.65	1.64331e-266	-0.521	down
TIMM17B	2.40682e-270	-2.22819	0.06	0.538	4.66923e-266	-0.478	down
RPS24	2.1851e-269	-2.83397	0.62	0.877	4.2391e-265	-0.257	down
DYNLL2	3.23704e-269	-2.80253	0.024	0.441	6.27985e-265	-0.417	down
MRPS33	5.38782e-269	-2.18084	0.094	0.599	1.04524e-264	-0.505	down
RNH1	6.40358e-269	-2.21636	0.3	0.827	1.24229e-264	-0.527	down
PSMC5	1.14641e-268	-2.08191	0.105	0.621	2.22403e-264	-0.516	down
EIF4A1	1.44852e-268	-2.21221	0.342	0.789	2.81013e-264	-0.447	down
KRTCAP2	1.5806e-268	-2.06051	0.124	0.647	3.06637e-264	-0.523	down
TRAPPC1	3.74462e-268	-2.51618	0.032	0.462	7.26456e-264	-0.43	down
RPSA	4.30402e-268	-2.96759	0.566	0.847	8.34981e-264	-0.281	down
IGFBP5	1.21299e-267	-4.5985	0.007	0.385	2.3532e-263	-0.378	down
ENSBTAG00000030305	2.9825e-267	-2.20296	0.079	0.569	5.78604e-263	-0.49	down
GNPDA1	3.76439e-267	-3.33342	0.019	0.421	7.30292e-263	-0.402	down
ENSBTAG00000052700	6.2054e-267	-2.96035	0.026	0.441	1.20385e-262	-0.415	down
COX4I1	8.09429e-267	-2.22384	0.337	0.775	1.57029e-262	-0.438	down
RPL21	1.34111e-266	-2.29908	0.346	0.777	2.60175e-262	-0.431	down
URAD	3.62355e-266	-2.37419	0.065	0.537	7.02969e-262	-0.472	down
PSME2	3.63128e-266	-2.77543	0.031	0.455	7.04469e-262	-0.424	down
DYNLL1	3.91256e-266	-2.19631	0.132	0.651	7.59036e-262	-0.519	down
NDUFC1	7.8543e-266	-2.01304	0.078	0.57	1.52373e-261	-0.492	down
PPP1R14A	8.12244e-266	-4.51751	0.007	0.383	1.57575e-261	-0.376	down
PRELID1	1.0304e-265	-1.98519	0.095	0.6	1.99898e-261	-0.505	down
ENSBTAG00000047029	1.14059e-265	-3.44894	0.012	0.398	2.21275e-261	-0.386	down
COL3A1	1.73159e-265	-3.15656	0.043	0.476	3.35929e-261	-0.433	down
RBM8A	2.52996e-265	-2.08793	0.089	0.587	4.90812e-261	-0.498	down
EIF3G	2.93056e-265	-2.1605	0.098	0.601	5.68528e-261	-0.503	down
DNPH1	3.9988e-265	-2.28439	0.061	0.534	7.75768e-261	-0.473	down
CST3	6.29726e-265	-2.72143	0.509	0.834	1.22167e-260	-0.325	down
UBXN1	7.48904e-265	-1.96393	0.095	0.602	1.45287e-260	-0.507	down
TAX1BP3	8.03654e-265	-2.38924	0.048	0.501	1.55909e-260	-0.453	down
RPL17	3.04223e-264	-2.25713	0.24	0.725	5.90193e-260	-0.485	down
FBLN2	4.6096e-264	-3.78131	0.018	0.414	8.94262e-260	-0.396	down
DNAJB9	5.0039e-264	-2.33411	0.046	0.495	9.70757e-260	-0.449	down
SERPINE2	5.40527e-264	-3.21202	0.04	0.474	1.04862e-259	-0.434	down
CD24	5.47604e-264	-4.0962	0.089	0.538	1.06235e-259	-0.449	down
ARPC5L	7.79375e-264	-2.11099	0.082	0.576	1.51199e-259	-0.494	down
JPT1	1.14173e-263	-1.59348	0.515	0.905	2.21495e-259	-0.39	down
FBP1	4.17913e-263	-4.60684	0.014	0.397	8.1075e-259	-0.383	down
SLC16A7	4.80459e-263	2.97649	0.764	0.41	9.3209e-259	0.354	up
RPL22	4.98322e-263	-2.46737	0.335	0.761	9.66745e-259	-0.426	down
RHOC	1.04604e-262	-2.03247	0.12	0.641	2.02933e-258	-0.521	down
ENSBTAG00000003937	2.21365e-262	-3.29449	0.016	0.407	4.29448e-258	-0.391	down
PTMA	4.14024e-262	-2.17336	0.438	0.823	8.03207e-258	-0.385	down
RER1	4.98952e-262	-1.89621	0.101	0.617	9.67968e-258	-0.516	down
SELENOK	1.61338e-261	-2.02221	0.064	0.539	3.12996e-257	-0.475	down
C16H1orf21	3.41248e-261	1.33354	0.971	0.913	6.6202e-257	0.058	ns
TAPBP	1.15683e-260	-2.77882	0.042	0.474	2.24425e-256	-0.432	down
COL1A2	1.53412e-260	-3.39327	0.023	0.424	2.9762e-256	-0.401	down
ENSBTAG00000047265	1.58992e-260	-2.13601	0.064	0.538	3.08445e-256	-0.474	down
HSD17B10	3.01121e-260	-2.86936	0.021	0.422	5.84176e-256	-0.401	down
HSD3B1	5.39425e-260	1.712	0.918	0.611	1.04648e-255	0.307	up
ATP6AP2	1.03141e-259	-1.96359	0.148	0.681	2.00094e-255	-0.533	down
SPARC	1.33673e-259	-3.57446	0.025	0.43	2.59325e-255	-0.405	down
SNU13	2.74149e-259	-2.15603	0.064	0.531	5.3185e-255	-0.467	down
ENSBTAG00000051232	2.89329e-259	-4.76759	0.009	0.379	5.61298e-255	-0.37	down
SLC39A2	3.17657e-259	-1.84281	0.217	0.755	6.16256e-255	-0.538	down
COA3	4.03969e-259	-2.0478	0.077	0.559	7.837e-255	-0.482	down
BANF1	4.92565e-259	-2.06114	0.065	0.537	9.55575e-255	-0.472	down
ASIP	8.0239e-259	-3.24441	0.012	0.391	1.55664e-254	-0.379	down
SLC7A7	1.06464e-258	-3.16852	0.021	0.418	2.0654e-254	-0.397	down
MRPL40	1.21415e-258	-2.18064	0.05	0.503	2.35545e-254	-0.453	down
RPL15	1.23546e-258	-2.72025	0.288	0.739	2.3968e-254	-0.451	down
SQSTM1	1.39163e-258	-2.43111	0.127	0.649	2.69977e-254	-0.522	down
SLC25A3	1.39338e-258	-2.03676	0.239	0.737	2.70316e-254	-0.498	down
TMED3	2.31657e-258	-2.40679	0.034	0.457	4.49414e-254	-0.423	down
DCTN3	2.41713e-258	-1.84349	0.076	0.565	4.68923e-254	-0.489	down
COPE	3.42337e-258	-2.02661	0.183	0.694	6.64134e-254	-0.511	down
BTG1	4.71602e-258	-2.14985	0.115	0.623	9.14909e-254	-0.508	down
MYL12A	6.69133e-258	-2.14972	0.257	0.749	1.29812e-253	-0.492	down
CTSZ	8.62156e-258	-3.52989	0.108	0.607	1.67258e-253	-0.499	down
HINT1	4.11902e-257	-2.35209	0.16	0.657	7.9909e-253	-0.497	down
MRPS21	4.56077e-257	-2.22895	0.047	0.489	8.84789e-253	-0.442	down
PSMD13	8.28438e-257	-1.97524	0.085	0.577	1.60717e-252	-0.492	down
MYADM	8.4682e-257	-2.79663	0.031	0.445	1.64283e-252	-0.414	down
SLC44A2	9.94033e-257	-1.88168	0.094	0.601	1.92842e-252	-0.507	down
NDUFA8	2.93544e-256	-2.04548	0.069	0.541	5.69475e-252	-0.472	down
RPS15	2.9586e-256	-2.57005	0.376	0.777	5.73969e-252	-0.401	down
MEA1	3.18538e-256	-2.59554	0.023	0.424	6.17964e-252	-0.401	down
MIF	3.70701e-256	-2.29372	0.114	0.611	7.1916e-252	-0.497	down
ALDOA	4.69872e-256	-2.17814	0.259	0.745	9.11552e-252	-0.486	down
NHERF1	5.49254e-256	-4.48776	0.009	0.375	1.06555e-251	-0.366	down
SLC25A4	6.46239e-256	-2.31471	0.032	0.449	1.2537e-251	-0.417	down
ARF5	1.01006e-255	-2.11124	0.061	0.521	1.95951e-251	-0.46	down
STK17A	1.114e-255	-2.03634	0.119	0.641	2.16115e-251	-0.522	down
FIS1	1.32761e-255	-2.20189	0.064	0.528	2.57556e-251	-0.464	down
SMARCA2	1.86662e-255	2.72034	0.774	0.461	3.62125e-251	0.313	up
CCN2	1.93928e-255	-3.54813	0.023	0.417	3.76221e-251	-0.394	down
CHCHD5	2.54489e-255	-1.85807	0.083	0.574	4.93709e-251	-0.491	down
LSM3	3.19448e-255	-2.14682	0.083	0.563	6.1973e-251	-0.48	down
C15H11orf96	7.14114e-255	-5.01014	0.004	0.357	1.38538e-250	-0.353	down
UQCRB	1.34648e-254	-2.11909	0.17	0.674	2.61217e-250	-0.504	down
SLC43A2	2.89343e-254	-4.27759	0.005	0.363	5.61326e-250	-0.358	down
TRIOBP	6.66235e-254	-1.79262	0.111	0.636	1.2925e-249	-0.525	down
MRPL34	1.06988e-253	-1.97472	0.05	0.494	2.07556e-249	-0.444	down
JAGN1	1.36974e-253	-2.0713	0.052	0.499	2.65729e-249	-0.447	down
PPP1CA	2.0175e-253	-1.94777	0.167	0.684	3.91396e-249	-0.517	down
TNFRSF19	4.50493e-253	2.94924	0.749	0.379	8.73957e-249	0.37	up
MYL6	8.17662e-253	-2.06527	0.466	0.826	1.58627e-248	-0.36	down
PHB1	1.72544e-252	-2.10997	0.083	0.559	3.34735e-248	-0.476	down
TMEM223	1.84712e-252	-2.39189	0.036	0.456	3.5834e-248	-0.42	down
APEX1	2.31482e-252	-2.23732	0.06	0.514	4.49075e-248	-0.454	down
ATP6V1G1	2.74968e-252	-2.09353	0.16	0.669	5.33437e-248	-0.509	down
DOCK1	2.82202e-252	1.32338	0.958	0.941	5.47472e-248	0.017	ns
NDUFB1	4.50113e-252	-2.02646	0.083	0.563	8.73219e-248	-0.48	down
EPAS1	4.53338e-252	1.22181	0.972	0.916	8.79475e-248	0.056	ns
PRKCG	2.06318e-251	-2.13311	0.07	0.539	4.00256e-247	-0.469	down
MISP3	3.58586e-251	-2.39479	0.07	0.531	6.95657e-247	-0.461	down
ENSBTAG00000012276	5.2046e-251	-3.13118	0.014	0.388	1.00969e-246	-0.374	down
CDK2AP2	6.52224e-251	-2.36831	0.04	0.461	1.26531e-246	-0.421	down
MRFAP1L1	1.04573e-250	-1.9176	0.266	0.76	2.02871e-246	-0.494	down
BUD31	1.61973e-250	-2.01623	0.086	0.568	3.14228e-246	-0.482	down
TMBIM6	1.93255e-250	-2.1619	0.526	0.829	3.74914e-246	-0.303	down
SNRNP25	2.77675e-250	-2.35283	0.04	0.465	5.3869e-246	-0.425	down
TRMT112	3.76134e-250	-2.24496	0.043	0.471	7.297e-246	-0.428	down
CYC1	1.10072e-249	-2.00582	0.176	0.692	2.1354e-245	-0.516	down
KDELR3	2.44664e-249	-2.46665	0.027	0.426	4.74648e-245	-0.399	down
CRELD2	2.6478e-249	-2.54082	0.043	0.469	5.13674e-245	-0.426	down
TIMM8A	4.466e-249	-2.34407	0.042	0.465	8.66404e-245	-0.423	down
CRIP1	4.71515e-249	-3.71666	0.022	0.407	9.14739e-245	-0.385	down
HSBP1.1	6.24364e-249	-1.8952	0.137	0.647	1.21127e-244	-0.51	down
AAMP	1.10957e-248	-2.16089	0.044	0.474	2.15256e-244	-0.43	down
ATP10A	2.47664e-248	4.22543	0.574	0.044	4.80468e-244	0.53	up
UBE2M	2.58407e-248	-1.93671	0.078	0.552	5.0131e-244	-0.474	down
EZR	2.67333e-248	-1.44982	0.787	0.973	5.18626e-244	-0.186	down
SMOC1	3.1906e-248	6.80334	0.541	0.017	6.18976e-244	0.524	up
SMAD3	3.58702e-248	3.15961	0.705	0.242	6.95881e-244	0.463	up
WDR83OS	3.59135e-248	-2.03138	0.125	0.623	6.96721e-244	-0.498	down
BRK1	6.29432e-248	-1.85299	0.095	0.587	1.2211e-243	-0.492	down
MLF2	8.5882e-248	-2.1888	0.038	0.454	1.66611e-243	-0.416	down
MAGI3	1.39549e-247	1.81857	0.871	0.789	2.70725e-243	0.082	ns
LDHA	2.4146e-247	-1.95892	0.144	0.663	4.68432e-243	-0.519	down
UXT	2.60848e-247	-2.5606	0.024	0.415	5.06044e-243	-0.391	down
PDIA4	3.72326e-247	-1.95749	0.12	0.629	7.22313e-243	-0.509	down
SLC1A3	4.13977e-247	3.27603	0.716	0.289	8.03115e-243	0.427	up
AP2S1	4.20355e-247	-1.83107	0.119	0.622	8.1549e-243	-0.503	down
JUND	5.26609e-247	-2.23279	0.151	0.659	1.02162e-242	-0.508	down
PGK1	7.32454e-247	-1.95741	0.122	0.631	1.42096e-242	-0.509	down
RWDD1	8.15584e-247	-1.9152	0.074	0.543	1.58223e-242	-0.469	down
ENSBTAG00000038330	9.77412e-247	-1.87781	0.116	0.62	1.89618e-242	-0.504	down
NEDD8	1.05675e-246	-2.01058	0.107	0.599	2.0501e-242	-0.492	down
ENSBTAG00000039728	1.12664e-246	-2.71912	0.022	0.408	2.18568e-242	-0.386	down
MYDGF	1.38308e-246	-2.02545	0.065	0.523	2.68317e-242	-0.458	down
ATP5F1A	1.40865e-246	-2.15557	0.246	0.711	2.73279e-242	-0.465	down
QDPR	2.20255e-246	-1.65076	0.111	0.623	4.27294e-242	-0.512	down
PSMB1	3.10393e-246	-1.95318	0.168	0.671	6.02163e-242	-0.503	down
PHACTR2	3.22447e-246	-3.29601	0.055	0.482	6.25548e-242	-0.427	down
GABARAPL2	3.65923e-246	-1.82571	0.101	0.593	7.09891e-242	-0.492	down
POLR2H	5.13458e-246	-1.80003	0.068	0.53	9.96108e-242	-0.462	down
MRPS26	7.90846e-246	-1.99369	0.102	0.589	1.53424e-241	-0.487	down
GRN	1.49405e-245	-1.81	0.125	0.641	2.89846e-241	-0.516	down
PPT1	1.79031e-245	-2.19656	0.068	0.523	3.4732e-241	-0.455	down
MRPL12	2.01249e-245	-2.39227	0.044	0.466	3.90422e-241	-0.422	down
PDCD5	3.15039e-245	-2.00532	0.076	0.541	6.11175e-241	-0.465	down
PSMD2	4.35232e-245	-1.84003	0.12	0.627	8.44349e-241	-0.507	down
TIMM10	5.18241e-245	-1.93028	0.061	0.511	1.00539e-240	-0.45	down
CDKN2AIPNL	5.79833e-245	-1.96312	0.077	0.543	1.12488e-240	-0.466	down
VAT1	8.50866e-245	-1.96223	0.062	0.513	1.65068e-240	-0.451	down
CHMP2A	1.10782e-244	-1.80015	0.119	0.622	2.14916e-240	-0.503	down
RENBP	3.16706e-244	-2.62394	0.033	0.435	6.1441e-240	-0.402	down
SNRPB	3.30351e-244	-2.01427	0.108	0.594	6.4088e-240	-0.486	down
NDUFB2	3.307e-244	-2.32759	0.054	0.489	6.41558e-240	-0.435	down
NDUFA3	4.08407e-244	-2.13571	0.061	0.506	7.9231e-240	-0.445	down
VKORC1	5.35709e-244	-2.16484	0.04	0.455	1.03927e-239	-0.415	down
LMO1	1.42522e-243	-4.20656	0.006	0.352	2.76493e-239	-0.346	down
SCD	3.33904e-243	-2.15839	0.111	0.597	6.47775e-239	-0.486	down
SLC39A1	3.4049e-243	-1.72694	0.091	0.579	6.60551e-239	-0.488	down
ENSBTAG00000039555	3.58518e-243	-2.16332	0.24	0.708	6.95525e-239	-0.468	down
NAXE	6.80543e-243	-1.84295	0.059	0.507	1.32025e-238	-0.448	down
CENPX	6.88222e-243	-2.82035	0.023	0.405	1.33515e-238	-0.382	down
DNM3	7.16324e-243	-4.07206	0.019	0.389	1.38967e-238	-0.37	down
GALT	8.78924e-243	-2.11397	0.035	0.443	1.70511e-238	-0.408	down
ERH	9.77439e-243	-2.00898	0.168	0.666	1.89623e-238	-0.498	down
UQCRC1	1.05712e-242	-1.81322	0.136	0.645	2.05082e-238	-0.509	down
ISOC2	1.06701e-242	-2.33827	0.031	0.429	2.07001e-238	-0.398	down
FKBP4	2.4092e-242	-1.82612	0.103	0.596	4.67384e-238	-0.493	down
FAM20C	9.60981e-242	-2.75396	0.027	0.416	1.8643e-237	-0.389	down
CHPF	9.86131e-242	-2.09982	0.035	0.443	1.91309e-237	-0.408	down
CPPED1	1.47702e-241	4.75485	0.574	0.061	2.86543e-237	0.513	up
S100A16	1.79035e-241	-2.10286	0.138	0.627	3.47329e-237	-0.489	down
VGLL4	3.42795e-241	1.43409	0.921	0.858	6.65023e-237	0.063	ns
FOSB	5.77615e-241	-4.06781	0.012	0.367	1.12057e-236	-0.355	down
STARD10	6.33304e-241	-2.16573	0.145	0.629	1.22861e-236	-0.484	down
EIF3K	7.69835e-241	-1.84238	0.136	0.637	1.49348e-236	-0.501	down
EIF3M	9.82271e-241	-1.90211	0.131	0.63	1.9056e-236	-0.499	down
PRDX4	1.3673e-240	-2.20088	0.066	0.511	2.65256e-236	-0.445	down
MCOLN1	2.38893e-240	-1.90014	0.07	0.529	4.63453e-236	-0.459	down
FKBP3	3.4797e-240	-2.15745	0.046	0.468	6.75061e-236	-0.422	down
RPL11	4.88382e-240	-2.31891	0.637	0.869	9.4746e-236	-0.232	down
ENSBTAG00000008632	1.27405e-239	-1.9716	0.047	0.472	2.47166e-235	-0.425	down
SMIM1	1.93117e-239	-1.80248	0.069	0.525	3.74647e-235	-0.456	down
KDELR2	2.43127e-239	-1.83776	0.236	0.725	4.71666e-235	-0.489	down
RPS19BP1	2.4742e-239	-1.91859	0.099	0.579	4.79995e-235	-0.48	down
EMC6	2.58553e-239	-1.87352	0.061	0.505	5.01593e-235	-0.444	down
NSA2	3.26488e-239	-1.7833	0.097	0.582	6.33386e-235	-0.485	down
KCNK5	3.30285e-239	-2.93279	0.055	0.479	6.40752e-235	-0.424	down
RRAGA	3.98076e-239	-1.82877	0.048	0.475	7.72268e-235	-0.427	down
PRELID2	5.80652e-239	-2.08389	0.08	0.547	1.12647e-234	-0.467	down
NOP10	7.47541e-239	-1.86642	0.077	0.538	1.45023e-234	-0.461	down
ECM1	1.10626e-238	-2.70607	0.049	0.464	2.14614e-234	-0.415	down
ENSBTAG00000023274	1.24461e-238	-2.60335	0.023	0.403	2.41454e-234	-0.38	down
SUB1	1.72338e-238	-1.68307	0.183	0.701	3.34336e-234	-0.518	down
PSMA1	2.24812e-238	-1.8277	0.13	0.627	4.36134e-234	-0.497	down
PEX11G	3.08818e-238	-1.87583	0.07	0.525	5.99107e-234	-0.455	down
EFNA1	4.03266e-238	-1.99541	0.132	0.641	7.82336e-234	-0.509	down
VAMP8	6.21206e-238	-1.77544	0.125	0.625	1.20514e-233	-0.5	down
LSM4	1.06447e-237	-2.12917	0.069	0.515	2.06507e-233	-0.446	down
HNRNPAB	1.15802e-237	-1.8934	0.132	0.625	2.24657e-233	-0.493	down
GNB2	1.33589e-237	-1.82375	0.161	0.669	2.59162e-233	-0.508	down
F5	1.65906e-237	-4.16545	0.005	0.343	3.21858e-233	-0.338	down
PSMC1	2.39698e-237	-1.95433	0.089	0.557	4.65015e-233	-0.468	down
PSME1	3.00233e-237	-2.14176	0.062	0.501	5.82452e-233	-0.439	down
SHISA5	3.41509e-237	-1.71629	0.207	0.737	6.62527e-233	-0.53	down
POLR2L	3.85831e-237	-2.17888	0.072	0.519	7.48512e-233	-0.447	down
ENSBTAG00000037775	3.93547e-237	-1.8864	0.09	0.563	7.6348e-233	-0.473	down
SLC39A7	4.02542e-237	-1.70751	0.093	0.58	7.80931e-233	-0.487	down
HCFC1R1	4.06521e-237	-2.16436	0.035	0.435	7.8865e-233	-0.4	down
PSMB3	4.09147e-237	-1.86908	0.089	0.561	7.93746e-233	-0.472	down
TUBB2A	4.2922e-237	-2.53108	0.031	0.421	8.32687e-233	-0.39	down
SUMO2	9.30851e-237	-1.9736	0.205	0.69	1.80585e-232	-0.485	down
EEF2	1.59334e-236	-1.70323	0.375	0.804	3.09108e-232	-0.429	down
ENSBTAG00000023792	3.69374e-236	-2.14108	0.063	0.503	7.16586e-232	-0.44	down
BZW1	3.82386e-236	-1.63451	0.444	0.881	7.41829e-232	-0.437	down
C3H1orf146	7.83815e-236	-3.93633	0.011	0.359	1.5206e-231	-0.348	down
PGRMC1	1.1485e-235	-2.75706	0.022	0.392	2.22809e-231	-0.37	down
SH3BGRL2	1.23387e-235	1.8425	0.851	0.721	2.39371e-231	0.13	ns
SMIM26	3.14291e-235	-1.78149	0.057	0.491	6.09724e-231	-0.434	down
PLA2G15	3.2074e-235	-1.85828	0.199	0.704	6.22235e-231	-0.505	down
LPAR2	3.51804e-235	-2.98727	0.016	0.376	6.825e-231	-0.36	down
RIDA	4.15858e-235	-2.62291	0.017	0.38	8.06765e-231	-0.363	down
NDUFV1	8.54247e-235	-1.86817	0.105	0.584	1.65724e-230	-0.479	down
PLEKHJ1	1.10052e-234	-1.80005	0.066	0.515	2.13501e-230	-0.449	down
RNASEH2C	1.78759e-234	-2.2509	0.044	0.453	3.46792e-230	-0.409	down
NAA10	2.98935e-234	-1.93091	0.046	0.463	5.79934e-230	-0.417	down
PPP2R3A	3.84191e-234	-2.08788	0.198	0.736	7.45331e-230	-0.538	down
PFKL	4.84559e-234	-1.53239	0.099	0.583	9.40045e-230	-0.484	down
RPS15A	4.84703e-234	-2.36801	0.313	0.742	9.40323e-230	-0.429	down
SPCS3	5.67901e-234	-1.84026	0.124	0.613	1.10173e-229	-0.489	down
NDUFB6	1.71001e-233	-1.88026	0.05	0.472	3.31741e-229	-0.422	down
NDUFS8	1.76202e-233	-1.78911	0.135	0.635	3.41833e-229	-0.5	down
UBL4A	2.89349e-233	-1.93154	0.081	0.537	5.61338e-229	-0.456	down
RAN	3.33311e-233	-2.00481	0.239	0.713	6.46624e-229	-0.474	down
ARF2	3.49057e-233	-1.8041	0.098	0.574	6.7717e-229	-0.476	down
NCBP2	4.10765e-233	-2.57814	0.029	0.41	7.96884e-229	-0.381	down
TCIRG1	4.32037e-233	-1.52208	0.089	0.567	8.38152e-229	-0.478	down
TUBA1C	9.98353e-233	-1.9015	0.079	0.531	1.93681e-228	-0.452	down
MRPL54	1.08582e-232	-1.86282	0.055	0.482	2.1065e-228	-0.427	down
KRCC1	1.14317e-232	-2.34718	0.032	0.42	2.21774e-228	-0.388	down
GLRX2	3.69727e-232	-1.97874	0.038	0.439	7.1727e-228	-0.401	down
CASP6	3.74052e-232	-1.88305	0.135	0.625	7.25661e-228	-0.49	down
NDUFA6	5.82867e-232	-1.7733	0.13	0.621	1.13076e-227	-0.491	down
PDCL3	6.37931e-232	-2.2281	0.044	0.451	1.23759e-227	-0.407	down
AP3S1	6.63437e-232	-1.48968	0.156	0.682	1.28707e-227	-0.526	down
MZT2B	1.02361e-231	-1.92808	0.047	0.461	1.98581e-227	-0.414	down
DEGS1	1.05507e-231	-1.79977	0.177	0.687	2.04683e-227	-0.51	down
DGCR6L	1.09774e-231	-1.64485	0.072	0.525	2.12962e-227	-0.453	down
TALDO1	1.17218e-231	-1.85504	0.178	0.671	2.27403e-227	-0.493	down
ENSBTAG00000005315	1.45885e-231	-2.71834	0.028	0.405	2.83017e-227	-0.377	down
DMXL2	2.82714e-231	1.908	0.842	0.655	5.48466e-227	0.187	up
SURF4	3.20677e-231	-1.64581	0.17	0.692	6.22113e-227	-0.522	down
CHID1	3.81976e-231	-1.72958	0.126	0.619	7.41034e-227	-0.493	down
ATP6V0D2	5.86359e-231	-1.79332	0.11	0.597	1.13754e-226	-0.487	down
STMP1	6.46582e-231	-1.99056	0.215	0.697	1.25437e-226	-0.482	down
SNRPB2	9.72344e-231	-1.69954	0.16	0.669	1.88635e-226	-0.509	down
MFSD5	1.45853e-230	-2.82463	0.021	0.383	2.82954e-226	-0.362	down
ITSN1	1.8229e-230	3.26508	0.728	0.437	3.53643e-226	0.291	up
BLOC1S2	2.14077e-230	-1.743	0.118	0.611	4.1531e-226	-0.493	down
GLMP	2.16114e-230	-2.58443	0.034	0.423	4.1926e-226	-0.389	down
AKT3	2.38699e-230	1.32995	0.946	0.694	4.63076e-226	0.252	up
TMEM256	2.63662e-230	-1.84346	0.149	0.641	5.11504e-226	-0.492	down
VSNL1	3.20633e-230	-2.28734	0.081	0.532	6.22028e-226	-0.451	down
SDC4	3.59523e-230	-1.70168	0.148	0.671	6.97474e-226	-0.523	down
HSPH1	3.83019e-230	-1.60388	0.255	0.793	7.43057e-226	-0.538	down
SLC35B1	6.45268e-230	-1.91294	0.065	0.501	1.25182e-225	-0.436	down
CALM3	1.23861e-229	-1.86602	0.135	0.619	2.4029e-225	-0.484	down
SERTAD1	1.27506e-229	-3.28932	0.016	0.368	2.47362e-225	-0.352	down
DDT	1.4439e-229	-1.87281	0.12	0.603	2.80116e-225	-0.483	down
NDUFC2	1.52913e-229	-1.82381	0.135	0.625	2.96652e-225	-0.49	down
ANPEP	1.536e-229	-4.46248	0.009	0.343	2.97983e-225	-0.334	down
FAM174C	1.99737e-229	-1.87219	0.055	0.481	3.8749e-225	-0.426	down
COL1A1	3.81531e-229	-3.29844	0.021	0.383	7.4017e-225	-0.362	down
CACNA2D3	3.93345e-229	2.15812	0.749	0.23	7.6309e-225	0.519	up
PRELID3B	5.23752e-229	-1.77198	0.08	0.536	1.01608e-224	-0.456	down
VIM	5.52341e-229	-3.26117	0.023	0.388	1.07154e-224	-0.365	down
MRPL51	6.00603e-229	-1.73677	0.06	0.489	1.16517e-224	-0.429	down
DRAM1	6.13514e-229	-2.58996	0.032	0.414	1.19022e-224	-0.382	down
SERF1A	8.04169e-229	-2.95779	0.022	0.385	1.56009e-224	-0.363	down
COX6C	9.436e-229	-1.93489	0.247	0.715	1.83058e-224	-0.468	down
COX7B	1.34539e-228	-1.9361	0.107	0.575	2.61006e-224	-0.468	down
MRPL52	1.76972e-228	-2.02727	0.069	0.505	3.43327e-224	-0.436	down
VAV2	2.13791e-228	-2.49151	0.043	0.444	4.14754e-224	-0.401	down
ENTPD1	5.07406e-228	-2.20938	0.061	0.485	9.84367e-224	-0.424	down
EMC10	5.11206e-228	-1.72448	0.093	0.562	9.91739e-224	-0.469	down
SF3B6	5.80286e-228	-1.62073	0.112	0.599	1.12575e-223	-0.487	down
TRAPPC5	1.04027e-227	-1.6944	0.096	0.568	2.01812e-223	-0.472	down
TRIP12	1.48667e-227	1.46143	0.906	0.887	2.88414e-223	0.019	ns
MRPL43	2.81668e-227	-2.06038	0.036	0.425	5.46435e-223	-0.389	down
FUNDC2	5.50451e-227	-2.12212	0.044	0.447	1.06788e-222	-0.403	down
RPS19	7.91863e-227	-2.3241	0.495	0.82	1.53621e-222	-0.325	down
SEPTIN5	8.30948e-227	-3.46146	0.01	0.347	1.61204e-222	-0.337	down
CAPNS1	1.37748e-226	-1.71224	0.116	0.6	2.67232e-222	-0.484	down
SET	2.37657e-226	-1.98986	0.227	0.691	4.61054e-222	-0.464	down
FIBP	4.75816e-226	-1.87652	0.062	0.489	9.23082e-222	-0.427	down
SLC15A1	4.7972e-226	-1.67956	0.129	0.624	9.30657e-222	-0.495	down
TSC22D1	5.12975e-226	-2.89239	0.04	0.429	9.95171e-222	-0.389	down
EMC4	6.15251e-226	-1.71061	0.08	0.53	1.19359e-221	-0.45	down
EMC7	6.82721e-226	-1.80571	0.087	0.546	1.32448e-221	-0.459	down
LSM7	1.10698e-225	-2.14725	0.053	0.464	2.14754e-221	-0.411	down
EIF1B	1.20484e-225	-1.95936	0.07	0.507	2.33738e-221	-0.437	down
NDUFAF8	1.25976e-225	-2.18845	0.027	0.398	2.44394e-221	-0.371	down
NAA38	1.49409e-225	-1.84796	0.036	0.425	2.89854e-221	-0.389	down
SNRPD1	1.69789e-225	-1.93802	0.153	0.631	3.2939e-221	-0.478	down
MACF1	2.65741e-225	1.42508	0.921	0.903	5.15538e-221	0.018	ns
KARS1	3.12622e-225	-1.67813	0.085	0.545	6.06487e-221	-0.46	down
PRMT1	4.00225e-225	-1.93322	0.071	0.509	7.76437e-221	-0.438	down
GAMT	1.08208e-224	-1.68705	0.068	0.509	2.09924e-220	-0.441	down
TRIR	1.33355e-224	-1.64299	0.129	0.619	2.58708e-220	-0.49	down
USP9X	1.65815e-224	1.26308	0.947	0.887	3.21681e-220	0.06	ns
EPHA4	2.42113e-224	-3.25655	0.032	0.404	4.697e-220	-0.372	down
BUD23	4.16921e-224	-1.80798	0.085	0.537	8.08826e-220	-0.452	down
TRIM25	4.17927e-224	-1.83225	0.15	0.657	8.10778e-220	-0.507	down
CLDN4	4.27111e-224	-1.8447	0.483	0.871	8.28596e-220	-0.388	down
IFT20	5.2336e-224	-1.9445	0.049	0.458	1.01532e-219	-0.409	down
TXN2	5.24018e-224	-1.77174	0.059	0.483	1.01659e-219	-0.424	down
TBCB	1.12159e-223	-1.57842	0.078	0.527	2.17589e-219	-0.449	down
EIF3I	2.16043e-223	-1.46589	0.119	0.609	4.19124e-219	-0.49	down
PABIR2	3.60853e-223	1.80571	0.823	0.401	7.00055e-219	0.422	up
TNS1	3.94472e-223	2.53875	0.741	0.369	7.65276e-219	0.372	up
FCGRT	6.40885e-223	-2.78395	0.034	0.411	1.24332e-218	-0.377	down
SELENOS	2.58124e-222	-1.52175	0.118	0.605	5.0076e-218	-0.487	down
FAM162A	3.27099e-222	-1.81871	0.056	0.473	6.34571e-218	-0.417	down
SS18L2	8.76933e-222	-1.68416	0.064	0.491	1.70125e-217	-0.427	down
HES2	1.27554e-221	-2.48953	0.04	0.426	2.47455e-217	-0.386	down
YBEY	1.97616e-221	-1.56999	0.084	0.535	3.83376e-217	-0.451	down
GCNT2	2.56784e-221	1.93488	0.846	0.692	4.98161e-217	0.154	up
EXOSC4	4.64981e-221	-2.18979	0.033	0.411	9.02064e-217	-0.378	down
TNS3	4.76432e-221	4.05805	0.618	0.179	9.24277e-217	0.439	up
RABAC1	6.53571e-221	-1.71377	0.251	0.731	1.26793e-216	-0.48	down
ATF3	8.27155e-221	-2.18748	0.083	0.517	1.60468e-216	-0.434	down
CCDC124	8.45392e-221	-2.51331	0.022	0.376	1.64006e-216	-0.354	down
APOE	9.67089e-221	-3.30918	0.024	0.382	1.87615e-216	-0.358	down
ENSBTAG00000019437	9.73747e-221	-2.35192	0.02	0.373	1.88907e-216	-0.353	down
RBM47	1.12293e-220	1.05425	0.971	0.978	2.17849e-216	-0.007	ns
STOML2	1.39118e-220	-1.67162	0.078	0.522	2.69889e-216	-0.444	down
CLTA	1.69717e-220	-1.55326	0.413	0.813	3.29251e-216	-0.4	down
SDHD	1.98841e-220	-1.82451	0.097	0.553	3.85751e-216	-0.456	down
CPA4	2.34661e-220	-2.42996	0.072	0.493	4.55242e-216	-0.421	down
MRPL55	2.73302e-220	-1.96071	0.037	0.42	5.30205e-216	-0.383	down
GUK1	4.03539e-220	-1.51088	0.113	0.597	7.82866e-216	-0.484	down
UBE2S	4.15706e-220	-1.96661	0.175	0.657	8.0647e-216	-0.482	down
EMG1	6.89175e-220	-2.1205	0.031	0.403	1.337e-215	-0.372	down
VPS13B	1.04003e-219	1.365	0.927	0.887	2.01767e-215	0.04	ns
VDAC2	1.08013e-219	-1.67752	0.307	0.771	2.09545e-215	-0.464	down
ENSBTAG00000039132	1.43581e-219	3.24646	0.711	0.395	2.78548e-215	0.316	up
ISCA1	1.64499e-219	-1.59804	0.084	0.534	3.19127e-215	-0.45	down
ENSBTAG00000053057	1.98645e-219	-3.46891	0.021	0.369	3.85372e-215	-0.348	down
EGR1	2.84756e-219	-2.02537	0.102	0.558	5.52426e-215	-0.456	down
UBE2A	3.882e-219	-2.43421	0.022	0.375	7.53107e-215	-0.353	down
RAB5C	4.40849e-219	-1.60717	0.146	0.636	8.55247e-215	-0.49	down
ATP5F1B	5.32361e-219	-1.78071	0.326	0.755	1.03278e-214	-0.429	down
APH1A	9.15586e-219	-1.84122	0.05	0.452	1.77624e-214	-0.402	down
TMEM208	9.95553e-219	-1.79169	0.057	0.469	1.93137e-214	-0.412	down
ATP6V0D1	1.75897e-218	-1.71942	0.229	0.714	3.4124e-214	-0.485	down
FRMD4A	2.28273e-218	-2.51947	0.037	0.414	4.42849e-214	-0.377	down
SRSF9	2.52121e-218	-1.68893	0.128	0.609	4.89115e-214	-0.481	down
PBDC1	3.40493e-218	-2.34941	0.032	0.401	6.60556e-214	-0.369	down
TAGLN2	8.19934e-218	-1.61393	0.149	0.642	1.59067e-213	-0.493	down
NUTF2	1.10596e-217	-1.61693	0.082	0.525	2.14557e-213	-0.443	down
MARK1	1.33678e-217	1.53253	0.89	0.779	2.59335e-213	0.111	ns
PDHB	2.14891e-217	-1.63253	0.081	0.525	4.16889e-213	-0.444	down
PSMA4	5.77571e-217	-1.66082	0.122	0.597	1.12049e-212	-0.475	down
LAMP1	9.22645e-217	-1.63616	0.309	0.765	1.78993e-212	-0.456	down
KLF5	9.50219e-217	-3.19843	0.016	0.352	1.84342e-212	-0.336	down
BCO2	1.76537e-216	-1.92558	0.078	0.512	3.42482e-212	-0.434	down
RAMAC	1.84704e-216	-1.72393	0.056	0.464	3.58327e-212	-0.408	down
PLA2R1	1.91632e-216	-1.56433	0.171	0.7	3.71767e-212	-0.529	down
AKR1B1	2.29076e-216	-2.0284	0.699	0.903	4.44407e-212	-0.204	down
MRPS16	3.0708e-216	-1.46542	0.095	0.553	5.95736e-212	-0.458	down
POLR1D	3.83548e-216	-1.87308	0.053	0.455	7.44083e-212	-0.402	down
MRPL53	3.99753e-216	-1.65985	0.072	0.503	7.7552e-212	-0.431	down
BAX	4.6114e-216	-1.77606	0.054	0.46	8.94612e-212	-0.406	down
ENSBTAG00000045504	6.56957e-216	-3.08219	0.008	0.325	1.2745e-211	-0.317	down
CNPY2	7.5042e-216	-2.41325	0.026	0.383	1.45581e-211	-0.357	down
ENSBTAG00000052720	7.5663e-216	-3.09654	0.011	0.335	1.46786e-211	-0.324	down
PSMG1	9.0723e-216	-1.90447	0.055	0.461	1.76003e-211	-0.406	down
TUBA1B	1.29848e-215	-2.06408	0.305	0.747	2.51904e-211	-0.442	down
MRPL16	1.97531e-215	-2.88735	0.015	0.347	3.83211e-211	-0.332	down
MED21	2.14371e-215	-1.67184	0.108	0.574	4.15879e-211	-0.466	down
ABCC2	2.46199e-215	4.92926	0.532	0.061	4.77626e-211	0.471	up
AP3B1	3.38435e-215	1.2625	0.928	0.922	6.56564e-211	0.006	ns
NFIB	3.69011e-215	5.59008	0.499	0.024	7.15882e-211	0.475	up
HIGD2A	3.82684e-215	-2.50405	0.017	0.354	7.42408e-211	-0.337	down
EFNB1	4.12119e-215	-1.63322	0.098	0.554	7.99512e-211	-0.456	down
CSKMT	7.67671e-215	-2.60614	0.02	0.363	1.48928e-210	-0.343	down
DNLZ	1.01814e-214	-2.83441	0.013	0.341	1.97519e-210	-0.328	down
ASS1	1.49624e-214	-3.35331	0.014	0.343	2.90271e-210	-0.329	down
RPN1	1.65835e-214	-1.57056	0.242	0.733	3.2172e-210	-0.491	down
GLRX5	2.44692e-214	-2.42091	0.023	0.373	4.74703e-210	-0.35	down
ZFHX3	2.93028e-214	1.4229	0.909	0.849	5.68474e-210	0.06	ns
PSMC3	4.65268e-214	-1.55378	0.141	0.626	9.02619e-210	-0.485	down
EML4	5.77609e-214	-1.69815	0.402	0.899	1.12056e-209	-0.497	down
ATP8	7.25832e-214	-2.0438	0.033	0.401	1.40811e-209	-0.368	down
SEM1	7.52984e-214	-1.84589	0.235	0.691	1.46079e-209	-0.456	down
MKKS	1.71256e-213	-1.57635	0.098	0.55	3.32236e-209	-0.452	down
UQCC6	3.21829e-213	-1.58943	0.052	0.452	6.24348e-209	-0.4	down
NIFK	4.52735e-213	-1.6525	0.112	0.579	8.78305e-209	-0.467	down
ENSBTAG00000052465	6.57787e-213	-4.34613	0.005	0.309	1.27611e-208	-0.304	down
TMEM14A	9.83109e-213	-1.76767	0.055	0.459	1.90723e-208	-0.404	down
TBC1D9B	1.01677e-212	-1.81907	0.113	0.58	1.97254e-208	-0.467	down
ACTN4	1.03643e-212	1.24926	0.904	0.908	2.01068e-208	-0.004	ns
ADAM28	1.35643e-212	-5.80838	0.032	0.382	2.63148e-208	-0.35	down
CAPN2	1.48745e-212	-2.49699	0.045	0.427	2.88566e-208	-0.382	down
DSTN	1.54802e-212	-2.13572	0.563	0.854	3.00317e-208	-0.291	down
MYO5B	1.62247e-212	-2.6811	0.105	0.549	3.1476e-208	-0.444	down
HYAL2	4.86012e-212	-2.26906	0.028	0.383	9.42863e-208	-0.355	down
ATP5F1C	5.5903e-212	-1.69892	0.255	0.719	1.08452e-207	-0.464	down
ELOB	6.30967e-212	-1.64645	0.158	0.637	1.22408e-207	-0.479	down
ADI1	8.47883e-212	-1.75753	0.083	0.517	1.64489e-207	-0.434	down
ALKBH7	9.61502e-212	-1.86226	0.043	0.425	1.86531e-207	-0.382	down
TOB1	9.70703e-212	-2.30147	0.058	0.456	1.88316e-207	-0.398	down
RNPEPL1	2.0839e-211	-1.65596	0.053	0.453	4.04276e-207	-0.4	down
NDUFB4	2.86444e-211	-1.52021	0.123	0.596	5.55701e-207	-0.473	down
CCDC167	3.15678e-211	-2.01455	0.048	0.435	6.12415e-207	-0.387	down
JUNB	3.22339e-211	-2.39636	0.054	0.445	6.25338e-207	-0.391	down
PSMC4	5.32732e-211	-1.41749	0.068	0.491	1.0335e-206	-0.423	down
HINT2	5.81219e-211	-1.68458	0.037	0.411	1.12757e-206	-0.374	down
UBC	8.79647e-211	-1.69192	0.291	0.797	1.70651e-206	-0.506	down
PRSS8	9.97985e-211	-1.53346	0.183	0.683	1.93609e-206	-0.5	down
GUSB	1.31707e-210	-1.89799	0.052	0.445	2.55511e-206	-0.393	down
ARHGDIA	2.36211e-210	-1.49464	0.165	0.657	4.5825e-206	-0.492	down
RNF130	2.60387e-210	2.02764	0.804	0.607	5.05152e-206	0.197	up
ARHGAP28	3.48661e-210	4.32099	0.571	0.12	6.76402e-206	0.451	up
PRKCSH	4.74462e-210	-1.49203	0.109	0.574	9.20456e-206	-0.465	down
DNAJA1	5.18774e-210	-1.45019	0.24	0.744	1.00642e-205	-0.504	down
DPY30	5.24845e-210	-1.65101	0.079	0.509	1.0182e-205	-0.43	down
GRK5	5.62929e-210	3.72926	0.615	0.188	1.09208e-205	0.427	up
SNRPG	1.16916e-209	-1.69477	0.15	0.622	2.26816e-205	-0.472	down
MED13L	1.23515e-209	1.2627	0.921	0.928	2.39618e-205	-0.007	ns
PRR13	2.46138e-209	-1.81015	0.038	0.411	4.77507e-205	-0.373	down
SIGIRR	2.7598e-209	-1.38425	0.111	0.583	5.35401e-205	-0.472	down
LGALS9	3.43169e-209	-1.75225	0.083	0.518	6.65748e-205	-0.435	down
PDZD11	6.66434e-209	-1.83375	0.033	0.394	1.29288e-204	-0.361	down
MPG	7.32043e-209	-1.70413	0.048	0.437	1.42016e-204	-0.389	down
TNFRSF12A	1.26113e-208	-2.87813	0.022	0.361	2.44659e-204	-0.339	down
FKBP2	1.33689e-208	-1.52957	0.143	0.627	2.59357e-204	-0.484	down
MAGOH	2.62216e-208	-1.47692	0.088	0.53	5.08699e-204	-0.442	down
GMPPA	4.122e-208	-1.4419	0.098	0.551	7.99669e-204	-0.453	down
CST6	4.2838e-208	-1.76932	0.088	0.523	8.31056e-204	-0.435	down
TIMM8B	6.06185e-208	-1.56703	0.089	0.529	1.176e-203	-0.44	down
SERPINB6	6.55372e-208	-1.55557	0.112	0.57	1.27142e-203	-0.458	down
COX14	7.14383e-208	-1.42255	0.114	0.581	1.3859e-203	-0.467	down
FNIP2	8.54373e-208	-2.22585	0.135	0.604	1.65748e-203	-0.469	down
NDUFAB1	1.54655e-207	-1.71688	0.135	0.595	3.00031e-203	-0.46	down
EPHX2	1.77535e-207	2.05623	0.795	0.678	3.44417e-203	0.117	ns
LMAN2	1.88157e-207	-1.48988	0.2	0.696	3.65025e-203	-0.496	down
PYCR3	2.16743e-207	-1.82772	0.048	0.432	4.20481e-203	-0.384	down
AP1S1	3.16133e-207	-1.59589	0.074	0.494	6.13297e-203	-0.42	down
RPA3	3.83007e-207	-1.67018	0.058	0.458	7.43034e-203	-0.4	down
EPHA7	4.26463e-207	6.48141	0.487	0.029	8.27339e-203	0.458	up
IL17RC	5.31714e-207	-1.62891	0.084	0.521	1.03153e-202	-0.437	down
AGAP1	8.86644e-207	1.62554	0.849	0.694	1.72009e-202	0.155	up
DDA1	9.23216e-207	-1.46586	0.079	0.509	1.79104e-202	-0.43	down
VDAC1	1.74115e-206	-1.56433	0.15	0.629	3.37784e-202	-0.479	down
DNAJB1	3.09471e-206	-1.71375	0.258	0.755	6.00373e-202	-0.497	down
CRAT	3.67546e-206	-2.45959	0.022	0.357	7.13039e-202	-0.335	down
LDHB	5.83657e-206	-1.8048	0.166	0.631	1.13229e-201	-0.465	down
PEG3	7.06638e-206	1.20855	0.963	0.823	1.37088e-201	0.14	ns
IMPA1	7.31952e-206	-1.51339	0.135	0.615	1.41999e-201	-0.48	down
MIEN1	7.81373e-206	-2.37621	0.021	0.353	1.51586e-201	-0.332	down
PIGC	1.1519e-205	-1.60624	0.052	0.442	2.23469e-201	-0.39	down
NRK	1.16642e-205	1.52053	0.85	0.386	2.26286e-201	0.464	up
DUSP1	1.26454e-205	-1.88674	0.077	0.493	2.45321e-201	-0.416	down
RNF187	1.27586e-205	-1.81303	0.062	0.463	2.47518e-201	-0.401	down
MMP23	1.44336e-205	-3.8113	0.006	0.305	2.80011e-201	-0.299	down
ID2	1.83666e-205	-1.7317	0.164	0.645	3.56312e-201	-0.481	down
NEU1	2.36446e-205	-1.87276	0.053	0.439	4.58705e-201	-0.386	down
STUB1	2.67885e-205	-1.42325	0.094	0.537	5.19697e-201	-0.443	down
ASL	4.28654e-205	-1.9569	0.056	0.446	8.31588e-201	-0.39	down
PPP1R15A	4.35065e-205	-2.27035	0.074	0.48	8.44025e-201	-0.406	down
RBM3	7.27237e-205	-1.53124	0.151	0.633	1.41084e-200	-0.482	down
H2AJ	7.88215e-205	-1.6536	0.245	0.711	1.52914e-200	-0.466	down
SLIRP	9.94017e-205	-1.64309	0.055	0.448	1.92839e-200	-0.393	down
METTL26	1.28455e-204	-1.40047	0.092	0.534	2.49202e-200	-0.442	down
CDC37	1.35342e-204	-1.40555	0.111	0.571	2.62563e-200	-0.46	down
PAFAH1B3	2.60639e-204	-1.51486	0.109	0.563	5.05639e-200	-0.454	down
GPI	5.30005e-204	-1.47859	0.207	0.697	1.02821e-199	-0.49	down
CACYBP	6.16718e-204	-1.63919	0.193	0.687	1.19643e-199	-0.494	down
GPR39	6.58172e-204	2.82428	0.655	0.216	1.27685e-199	0.439	up
STXBP5	7.37072e-204	1.42554	0.888	0.789	1.42992e-199	0.099	ns
USP34	7.75282e-204	1.52145	0.867	0.835	1.50405e-199	0.032	ns
TMEM14C	9.90027e-204	-1.54277	0.148	0.622	1.92065e-199	-0.474	down
PRKCA	9.99357e-204	2.93451	0.709	0.388	1.93875e-199	0.321	up
ENSBTAG00000022275	1.399e-203	-3.29061	0.009	0.311	2.71405e-199	-0.302	down
PFDN4	1.44326e-203	-1.51008	0.094	0.535	2.79993e-199	-0.441	down
DYNLT3	2.19e-203	-1.52596	0.078	0.503	4.24859e-199	-0.425	down
ZNF706	2.41021e-203	-1.42922	0.105	0.555	4.6758e-199	-0.45	down
ENY2	2.74454e-203	-1.43709	0.099	0.547	5.32441e-199	-0.448	down
ATP6V1E1	2.77934e-203	-1.49646	0.251	0.762	5.39192e-199	-0.511	down
BCAP31	3.16081e-203	-1.60055	0.267	0.735	6.13197e-199	-0.468	down
DPP3	3.53598e-203	-1.29151	0.137	0.626	6.8598e-199	-0.489	down
C9H6orf120	4.13802e-203	-1.94445	0.03	0.377	8.02776e-199	-0.347	down
SDF2	5.9827e-203	-1.39668	0.109	0.564	1.16064e-198	-0.455	down
GCH1	7.40276e-203	-1.85891	0.13	0.591	1.43613e-198	-0.461	down
REX1BD	8.82509e-203	-1.62337	0.054	0.445	1.71207e-198	-0.391	down
MRPS23	1.06158e-202	-1.90192	0.038	0.402	2.05946e-198	-0.364	down
CRB3	1.22676e-202	-3.1865	0.009	0.31	2.37991e-198	-0.301	down
IDI1	1.37765e-202	-1.91439	0.097	0.527	2.67264e-198	-0.43	down
MSRB1	1.82622e-202	-2.87937	0.013	0.324	3.54286e-198	-0.311	down
ABHD14B	4.15401e-202	-1.70839	0.146	0.606	8.05879e-198	-0.46	down
FSCN1	8.49914e-202	-1.48737	0.146	0.623	1.64883e-197	-0.477	down
EHD1	8.8166e-202	-1.39774	0.082	0.513	1.71042e-197	-0.431	down
PSMD7	1.08121e-201	-1.60328	0.169	0.642	2.09756e-197	-0.473	down
TSEN34	1.35741e-201	-1.77478	0.044	0.414	2.63337e-197	-0.37	down
AURKAIP1	2.25335e-201	-1.71968	0.05	0.429	4.37149e-197	-0.379	down
TMED4	3.03599e-201	-1.56176	0.156	0.635	5.88982e-197	-0.479	down
NPM1	3.38365e-201	-1.55071	0.141	0.607	6.56428e-197	-0.466	down
SNX17	4.44452e-201	-1.44881	0.058	0.452	8.62237e-197	-0.394	down
OSBPL9	5.8851e-201	1.34035	0.889	0.842	1.14171e-196	0.047	ns
ADK	6.41181e-201	1.62679	0.862	0.864	1.24389e-196	-0.002	ns
HNRNPA0	6.76556e-201	-1.63047	0.072	0.485	1.31252e-196	-0.413	down
ENSBTAG00000050249	7.64679e-201	-1.59073	0.078	0.495	1.48348e-196	-0.417	down
PSMG3	8.02833e-201	-1.40303	0.067	0.474	1.5575e-196	-0.407	down
FLNC	1.02182e-200	-4.88631	0	0.279	1.98232e-196	-0.279	down
YBX1	1.06716e-200	-1.61963	0.34	0.766	2.0703e-196	-0.426	down
CD55	2.28398e-200	-5.63351	0.002	0.284	4.43092e-196	-0.282	down
CRPPA	2.75821e-200	2.36085	0.759	0.51	5.35093e-196	0.249	up
VASN	3.31164e-200	-2.64883	0.019	0.341	6.42457e-196	-0.322	down
SCAND1	3.31964e-200	-1.59766	0.049	0.429	6.4401e-196	-0.38	down
RSL1D1	3.46011e-200	-1.63162	0.067	0.471	6.71261e-196	-0.404	down
SHB	5.43663e-200	-2.00984	0.066	0.465	1.05471e-195	-0.399	down
B3GAT3	5.63711e-200	-1.31755	0.1	0.549	1.0936e-195	-0.449	down
DIPK1A	6.08691e-200	-1.96762	0.108	0.551	1.18086e-195	-0.443	down
CHD7	7.44949e-200	-1.40184	0.207	0.739	1.4452e-195	-0.532	down
CNDP2	1.07429e-199	-1.27635	0.248	0.769	2.08413e-195	-0.521	down
FAF1	1.30886e-199	1.10696	0.946	0.927	2.53919e-195	0.019	ns
UQCC5	1.47351e-199	-1.89733	0.024	0.357	2.85861e-195	-0.333	down
FGFR3	1.86177e-199	-2.44394	0.018	0.339	3.61183e-195	-0.321	down
PFDN6	1.88265e-199	-1.38961	0.113	0.567	3.65235e-195	-0.454	down
ERC1	2.68792e-199	1.52028	0.866	0.67	5.21457e-195	0.196	up
GNG10	3.03542e-199	-1.50504	0.141	0.615	5.88872e-195	-0.474	down
SDF4	3.27586e-199	-1.3459	0.107	0.554	6.35517e-195	-0.447	down
DNAJB11	3.89301e-199	-1.52688	0.079	0.497	7.55245e-195	-0.418	down
TMCO1	5.05579e-199	-1.61926	0.216	0.688	9.80823e-195	-0.472	down
PEX19	5.10453e-199	-1.76037	0.031	0.376	9.90278e-195	-0.345	down
DNASE2	1.89638e-198	-1.67013	0.414	0.835	3.67898e-194	-0.421	down
ABHD17A	4.67059e-198	-1.3937	0.06	0.453	9.06094e-194	-0.393	down
KIAA2013	5.91887e-198	-1.87291	0.039	0.397	1.14826e-193	-0.358	down
H3-3A	8.20243e-198	-1.52368	0.313	0.761	1.59127e-193	-0.448	down
PLAU	1.07023e-197	-4.69417	0.005	0.291	2.07625e-193	-0.286	down
DNPEP	1.25403e-197	-1.88711	0.027	0.362	2.43282e-193	-0.335	down
ERP29	1.42666e-197	-1.65041	0.181	0.647	2.76772e-193	-0.466	down
ELF3	1.58126e-197	-1.5004	0.213	0.733	3.06764e-193	-0.52	down
IFNT2	7.46871e-197	-8.89603	0.001	0.277	1.44893e-192	-0.276	down
DHRS1	1.08935e-196	-1.43517	0.061	0.455	2.11334e-192	-0.394	down
JOSD2	1.12796e-196	-1.82921	0.026	0.358	2.18825e-192	-0.332	down
ERC2	1.238e-196	-2.66779	0.039	0.388	2.40172e-192	-0.349	down
ATP5PO	1.28821e-196	-1.64046	0.212	0.67	2.49912e-192	-0.458	down
BTBD1	1.50415e-196	-1.66811	0.081	0.497	2.91806e-192	-0.416	down
ENSBTAG00000046486	1.52962e-196	-3.09818	0.012	0.313	2.96746e-192	-0.301	down
ECI2	1.55105e-196	-2.28877	0.029	0.366	3.00903e-192	-0.337	down
CIAO2B	1.68369e-196	-1.41858	0.094	0.525	3.26635e-192	-0.431	down
RHOU	4.12116e-196	-2.79916	0.017	0.331	7.99506e-192	-0.314	down
PSMB2	7.02698e-196	-1.60448	0.286	0.725	1.36323e-191	-0.439	down
CCDC59	8.60717e-196	-1.70961	0.042	0.404	1.66979e-191	-0.362	down
SEC61G	9.4225e-196	-1.58283	0.239	0.701	1.82796e-191	-0.462	down
MRPL23	1.89921e-195	-1.56117	0.126	0.58	3.68447e-191	-0.454	down
MRPS7	1.91185e-195	-1.74772	0.036	0.386	3.70898e-191	-0.35	down
ENSBTAG00000049406	2.61594e-195	-3.54702	0.011	0.306	5.07493e-191	-0.295	down
NDUFS3	3.23367e-195	-1.42163	0.103	0.539	6.27331e-191	-0.436	down
SYNE4	4.07321e-195	-2.54062	0.021	0.341	7.90203e-191	-0.32	down
SCPEP1	4.32163e-195	-1.45004	0.214	0.723	8.38396e-191	-0.509	down
CDK4	4.71488e-195	-1.77887	0.052	0.429	9.14687e-191	-0.377	down
TMEM150A	6.0102e-195	-2.57365	0.013	0.316	1.16598e-190	-0.303	down
PNKD	8.80321e-195	-2.59039	0.015	0.322	1.70782e-190	-0.307	down
PRPSAP1	1.04181e-194	-1.43784	0.124	0.586	2.02111e-190	-0.462	down
ENSBTAG00000048386	1.48705e-194	-1.77276	0.042	0.399	2.88488e-190	-0.357	down
VPS28	1.6446e-194	-1.26154	0.102	0.545	3.19052e-190	-0.443	down
CZIB	1.76502e-194	-1.32648	0.072	0.477	3.42414e-190	-0.405	down
HKDC1	2.35184e-194	-1.51936	0.255	0.761	4.56256e-190	-0.506	down
DAAM1	2.66443e-194	-1.89943	0.142	0.601	5.169e-190	-0.459	down
CCT5	4.02485e-194	-1.59969	0.128	0.578	7.80821e-190	-0.45	down
EBNA1BP2	5.84626e-194	-1.53596	0.035	0.383	1.13417e-189	-0.348	down
POP7	9.70962e-194	-1.84367	0.033	0.376	1.88367e-189	-0.343	down
NMT2	1.33e-193	-2.82439	0.022	0.339	2.58021e-189	-0.317	down
SHROOM3	5.22213e-193	1.15843	0.937	0.916	1.01309e-188	0.021	ns
HYPK	6.3214e-193	-1.33817	0.141	0.612	1.22635e-188	-0.471	down
SEC11C	6.85228e-193	-1.48184	0.091	0.514	1.32934e-188	-0.423	down
ZNRF3	7.20559e-193	2.05119	0.772	0.5	1.39788e-188	0.272	up
RPN2	9.1932e-193	-1.55477	0.197	0.665	1.78348e-188	-0.468	down
TMEM97	1.28008e-192	-1.54199	0.11	0.548	2.48335e-188	-0.438	down
UQCC4	1.37432e-192	-1.23144	0.087	0.511	2.66617e-188	-0.424	down
DGKD	1.40656e-192	1.35577	0.883	0.846	2.72873e-188	0.037	ns
TBX2	1.83416e-192	-3.06034	0.012	0.307	3.55827e-188	-0.295	down
WNT6	2.06154e-192	-1.36502	0.108	0.545	3.99939e-188	-0.437	down
DAD1	2.16844e-192	-1.74453	0.258	0.688	4.20678e-188	-0.43	down
BLOC1S1	5.28652e-192	-1.58683	0.04	0.394	1.02558e-187	-0.354	down
TUFM	5.99981e-192	-1.22256	0.102	0.538	1.16396e-187	-0.436	down
SLK	1.72023e-191	-1.56471	0.118	0.564	3.33724e-187	-0.446	down
ICMT	3.10851e-191	-1.89325	0.029	0.359	6.03051e-187	-0.33	down
PTMS	3.22131e-191	-1.51465	0.153	0.615	6.24934e-187	-0.462	down
MTCH1	3.3129e-191	-1.41078	0.178	0.672	6.42702e-187	-0.494	down
ACOT7	5.68628e-191	-2.03062	0.046	0.403	1.10314e-186	-0.357	down
JUP	7.25382e-191	-1.39872	0.123	0.577	1.40724e-186	-0.454	down
ENSBTAG00000006383	1.06082e-190	-2.60263	0.016	0.318	2.058e-186	-0.302	down
SLC16A1	1.32922e-190	-1.75723	0.162	0.623	2.57868e-186	-0.461	down
NFIA	1.48708e-190	4.40227	0.513	0.077	2.88493e-186	0.436	up
ENSBTAG00000049812	1.68776e-190	-2.27645	0.067	0.443	3.27426e-186	-0.376	down
BNC2	1.78123e-190	1.87228	0.789	0.465	3.45558e-186	0.324	up
ARL6IP5	1.96423e-190	-1.74623	0.143	0.597	3.81061e-186	-0.454	down
SERP1	4.7521e-190	-1.35745	0.12	0.566	9.21908e-186	-0.446	down
ZDHHC9	5.23427e-190	-1.20997	0.127	0.589	1.01545e-185	-0.462	down
UCHL3	6.70682e-190	-1.37629	0.11	0.548	1.30112e-185	-0.438	down
PTPN6	7.6915e-190	-1.78976	0.046	0.406	1.49215e-185	-0.36	down
WIPF1	1.16901e-189	2.80577	0.698	0.421	2.26787e-185	0.277	up
FCHO2	1.28868e-189	2.25468	0.751	0.53	2.50004e-185	0.221	up
IFNT3	2.19844e-189	-9.69273	0.001	0.266	4.26497e-185	-0.265	down
ABR	2.54782e-189	1.62433	0.843	0.777	4.94278e-185	0.066	ns
TTLL12	2.78033e-189	-1.68622	0.065	0.449	5.39384e-185	-0.384	down
CWC15	2.84681e-189	-1.42423	0.094	0.516	5.5228e-185	-0.422	down
PRORSD1	2.95723e-189	-2.27379	0.023	0.338	5.73702e-185	-0.315	down
ACAA1	3.09073e-189	-1.20777	0.161	0.642	5.99601e-185	-0.481	down
MRPL58	6.36936e-189	-1.25882	0.108	0.547	1.23566e-184	-0.439	down
CHMP5	6.85021e-189	-1.37787	0.114	0.549	1.32894e-184	-0.435	down
MPPE1	7.42789e-189	-1.2016	0.207	0.716	1.44101e-184	-0.509	down
PPIA	1.0599e-188	-1.57244	0.206	0.66	2.0562e-184	-0.454	down
ENSBTAG00000049167	1.49794e-188	-2.64453	0.022	0.333	2.906e-184	-0.311	down
RHBG	2.0346e-188	-1.29288	0.206	0.706	3.94713e-184	-0.5	down
LPP	2.349e-188	1.22649	0.915	0.872	4.55706e-184	0.043	ns
ENSBTAG00000052892	2.53896e-188	-2.45788	0.02	0.329	4.92558e-184	-0.309	down
LIPA	3.98734e-188	-2.60515	0.086	0.469	7.73544e-184	-0.383	down
MRPS24	7.3254e-188	-1.27901	0.074	0.474	1.42113e-183	-0.4	down
MPC2	7.47035e-188	-1.32285	0.105	0.541	1.44925e-183	-0.436	down
SMAGP	8.10236e-188	-1.65942	0.063	0.444	1.57186e-183	-0.381	down
YIF1B	1.3539e-187	-2.14254	0.028	0.351	2.62657e-183	-0.323	down
TMPRSS4	1.46059e-187	-4.99517	0.001	0.265	2.83354e-183	-0.264	down
ELOVL7	1.52942e-187	3.38679	0.61	0.224	2.96708e-183	0.386	up
ATP6V1D	3.33282e-187	-1.22133	0.112	0.55	6.46567e-183	-0.438	down
DYNLRB1	4.31103e-187	-1.26412	0.101	0.531	8.36339e-183	-0.43	down
ATP5PB	5.19733e-187	-1.56758	0.274	0.708	1.00828e-182	-0.434	down
ARL1	6.17053e-187	-1.34868	0.074	0.473	1.19708e-182	-0.399	down
SLC12A2	7.02033e-187	-1.83698	0.116	0.549	1.36194e-182	-0.433	down
WWC3	7.52536e-187	1.26539	0.896	0.859	1.45992e-182	0.037	ns
MYCBP2	8.15218e-187	1.60457	0.846	0.831	1.58152e-182	0.015	ns
KIF13A	1.23052e-186	3.21457	0.63	0.253	2.3872e-182	0.377	up
CD99	1.31241e-186	-3.36603	0.013	0.302	2.54608e-182	-0.289	down
MTR	1.33494e-186	3.56928	0.62	0.259	2.58978e-182	0.361	up
BCL7C	1.71723e-186	-1.7078	0.043	0.393	3.33142e-182	-0.35	down
C19H17orf49	5.10439e-186	-1.47502	0.058	0.432	9.90251e-182	-0.374	down
LIMK2	5.42395e-186	-1.20847	0.291	0.806	1.05225e-181	-0.515	down
SIGMAR1	8.40467e-186	-1.6024	0.047	0.403	1.63051e-181	-0.356	down
LRP10	9.84787e-186	-1.25697	0.124	0.576	1.91049e-181	-0.452	down
B3GNT8	1.12919e-185	-1.99648	0.027	0.347	2.19064e-181	-0.32	down
GADD45GIP1	1.26194e-185	-1.56722	0.039	0.38	2.44817e-181	-0.341	down
MRPS12	1.48809e-185	-2.37263	0.021	0.327	2.8869e-181	-0.306	down
HNRNPH1	1.69196e-185	0.994364	0.941	0.95	3.2824e-181	-0.009	ns
LSM2	1.82552e-185	-1.45599	0.048	0.407	3.54151e-181	-0.359	down
CCNG1	2.18776e-185	-1.39429	0.086	0.495	4.24426e-181	-0.409	down
EMD	2.88036e-185	-1.24512	0.117	0.559	5.5879e-181	-0.442	down
PLD1	3.47647e-185	1.71663	0.818	0.629	6.74435e-181	0.189	up
GLIPR2	3.52567e-185	-3.05374	0.016	0.312	6.8398e-181	-0.296	down
DIAPH3	3.75666e-185	5.5171	0.622	0.287	7.28793e-181	0.335	up
VPS29	4.05973e-185	-1.25397	0.105	0.533	7.87588e-181	-0.428	down
SYNGR2	8.0187e-185	-1.88821	0.033	0.361	1.55563e-180	-0.328	down
GDE1	8.58774e-185	-1.63417	0.05	0.407	1.66602e-180	-0.357	down
ANKIB1	8.80228e-185	1.90281	0.792	0.648	1.70764e-180	0.144	ns
MYO6	1.05981e-184	-1.70589	0.295	0.805	2.05603e-180	-0.51	down
FBLIM1	1.12937e-184	-1.29642	0.068	0.457	2.19097e-180	-0.389	down
CNIH1	1.29267e-184	-1.49153	0.064	0.445	2.50778e-180	-0.381	down
SOX6	1.37744e-184	-2.16904	0.138	0.564	2.67223e-180	-0.426	down
PA2G4	1.66774e-184	-1.70784	0.163	0.61	3.23541e-180	-0.447	down
SLC35A3	1.67382e-184	-1.39827	0.204	0.699	3.24722e-180	-0.495	down
IFNT	1.70943e-184	-9.44835	0.001	0.259	3.3163e-180	-0.258	down
IK	1.82237e-184	-1.322	0.126	0.572	3.5354e-180	-0.446	down
PPFIBP1	3.81145e-184	3.64271	0.616	0.263	7.39421e-180	0.353	up
VTI1B	6.21981e-184	-1.2535	0.125	0.571	1.20664e-179	-0.446	down
TMED2	9.93807e-184	-1.41708	0.266	0.724	1.92799e-179	-0.458	down
PRXL2B	1.11104e-183	-2.59802	0.012	0.297	2.15541e-179	-0.285	down
MRPS2	1.3412e-183	-1.3212	0.077	0.476	2.60193e-179	-0.399	down
RASD1	1.60056e-183	-3.59654	0.01	0.289	3.10509e-179	-0.279	down
DPM3	2.54619e-183	-1.50945	0.054	0.418	4.93962e-179	-0.364	down
SYF2	2.57535e-183	-1.34378	0.051	0.413	4.99618e-179	-0.362	down
BOK	4.06336e-183	-2.438	0.027	0.343	7.88291e-179	-0.316	down
KIF16B	4.87412e-183	1.33517	0.883	0.787	9.45579e-179	0.096	ns
PICALM	5.75845e-183	1.59889	0.833	0.774	1.11714e-178	0.059	ns
DLX5	7.48105e-183	-1.27387	0.141	0.595	1.45132e-178	-0.454	down
CAMLG	1.23118e-182	-1.37208	0.063	0.439	2.3885e-178	-0.376	down
ENSBTAG00000045939	1.26046e-182	-6.01924	0.002	0.26	2.4453e-178	-0.258	down
TRPC5	1.32162e-182	-2.76914	0.047	0.388	2.56394e-178	-0.341	down
ARF3	1.44445e-182	-1.34085	0.118	0.555	2.80224e-178	-0.437	down
UQCC2	1.46264e-182	-1.67239	0.051	0.407	2.83751e-178	-0.356	down
CTDNEP1	1.67119e-182	-1.40684	0.055	0.419	3.24211e-178	-0.364	down
CDK2AP1	1.70532e-182	-1.47317	0.051	0.408	3.30832e-178	-0.357	down
LXN	1.73354e-182	-1.74518	0.042	0.385	3.36308e-178	-0.343	down
CALD1	3.45819e-182	1.73724	0.824	0.775	6.70889e-178	0.049	ns
IL11RA	4.09331e-182	-1.46573	0.064	0.441	7.94102e-178	-0.377	down
RASGRP2	4.21293e-182	-2.80217	0.013	0.298	8.17308e-178	-0.285	down
ENO3	4.4466e-182	-2.67796	0.028	0.342	8.62641e-178	-0.314	down
GCHFR	5.48057e-182	-1.93078	0.026	0.339	1.06323e-177	-0.313	down
SFMBT1	5.99376e-182	2.95903	0.681	0.425	1.16279e-177	0.256	up
GOT2	6.6725e-182	-1.33801	0.1	0.513	1.29446e-177	-0.413	down
GALNT12	1.00604e-181	-1.32457	0.07	0.455	1.95171e-177	-0.385	down
GSN	1.84775e-181	-1.94403	0.069	0.442	3.58464e-177	-0.373	down
RAC1	1.85964e-181	-1.08801	0.651	0.923	3.6077e-177	-0.272	down
CYB561D2	2.71664e-181	-1.70996	0.041	0.38	5.27028e-177	-0.339	down
ACOT8	2.81959e-181	-1.58742	0.063	0.434	5.47e-177	-0.371	down
ACAT2	3.09763e-181	-1.67601	0.097	0.505	6.00939e-177	-0.408	down
PARM1	3.51994e-181	-3.7589	0.015	0.303	6.82868e-177	-0.288	down
RTKN2	5.30802e-181	1.59971	0.805	0.464	1.02976e-176	0.341	up
SIVA1	6.41065e-181	-1.39748	0.059	0.426	1.24367e-176	-0.367	down
ZDHHC12	9.69033e-181	-1.68959	0.035	0.365	1.87992e-176	-0.33	down
COL18A1	1.02414e-180	-2.8206	0.016	0.306	1.98683e-176	-0.29	down
PTGFR	1.18747e-180	2.74451	0.645	0.274	2.30368e-176	0.371	up
NHP2	1.21231e-180	-2.06562	0.03	0.349	2.35188e-176	-0.319	down
EVA1B	1.61056e-180	-1.76469	0.035	0.362	3.12449e-176	-0.327	down
COBLL1	1.71629e-180	2.01941	0.753	0.523	3.32961e-176	0.23	up
CHMP3	3.04951e-180	-1.30155	0.166	0.626	5.91605e-176	-0.46	down
DENND6B	3.81608e-180	-1.25275	0.06	0.429	7.40319e-176	-0.369	down
PDCD6	4.29185e-180	-1.29239	0.209	0.679	8.32618e-176	-0.47	down
TCF7L2	4.47895e-180	1.48381	0.854	0.77	8.68916e-176	0.084	ns
C15H11orf52	5.26491e-180	-2.05195	0.022	0.325	1.02139e-175	-0.303	down
DNAJC19	8.6895e-180	-1.57063	0.044	0.387	1.68576e-175	-0.343	down
PLPP2	8.91186e-180	-1.13106	0.1	0.519	1.7289e-175	-0.419	down
SLC39A8	1.76426e-179	-3.05587	0.049	0.387	3.42267e-175	-0.338	down
DAB2	2.05437e-179	-1.63201	0.355	0.8	3.98548e-175	-0.445	down
TCF7L1	2.38276e-179	-1.36007	0.588	0.973	4.62256e-175	-0.385	down
CYB5R1	2.83531e-179	-1.79679	0.035	0.362	5.5005e-175	-0.327	down
TNFAIP8	2.95526e-179	3.02756	0.638	0.297	5.7332e-175	0.341	up
SNRPE	3.72602e-179	-1.67593	0.042	0.381	7.22848e-175	-0.339	down
MYL12B	4.08493e-179	-1.39144	0.06	0.428	7.92477e-175	-0.368	down
ANXA2	4.80574e-179	-1.07939	0.774	0.959	9.32314e-175	-0.185	down
PGP	4.96433e-179	-1.27166	0.134	0.577	9.6308e-175	-0.443	down
COPZ1	6.08747e-179	-1.16331	0.102	0.526	1.18097e-174	-0.424	down
GHITM	6.75315e-179	-1.26949	0.171	0.637	1.31011e-174	-0.466	down
BAMBI	1.05654e-178	-1.71196	0.069	0.443	2.04968e-174	-0.374	down
M6PR	1.13234e-178	-1.2748	0.142	0.597	2.19674e-174	-0.455	down
MRPL21	1.34072e-178	-1.14819	0.097	0.513	2.601e-174	-0.416	down
SRM	1.51181e-178	-2.69246	0.021	0.317	2.9329e-174	-0.296	down
CDKL5	1.99885e-178	1.82628	0.788	0.601	3.87776e-174	0.187	up
DTYMK	2.34133e-178	-1.66389	0.074	0.451	4.54217e-174	-0.377	down
NCL	2.59747e-178	-1.75713	0.275	0.704	5.0391e-174	-0.429	down
POLE3	3.30317e-178	-1.79392	0.041	0.376	6.40814e-174	-0.335	down
ENSBTAG00000053048	4.64002e-178	-3.05886	0.015	0.299	9.00163e-174	-0.284	down
HYOU1	5.73101e-178	-1.46513	0.072	0.453	1.11182e-173	-0.381	down
AUP1	6.22351e-178	-1.03365	0.134	0.587	1.20736e-173	-0.453	down
ENSBTAG00000045568	8.93988e-178	-2.93774	0.014	0.295	1.73434e-173	-0.281	down
CUEDC2	9.91425e-178	-1.5063	0.044	0.385	1.92337e-173	-0.341	down
DERL2	1.00826e-177	-1.15349	0.15	0.608	1.95603e-173	-0.458	down
TRPV5	1.08412e-177	-4.63346	0.005	0.266	2.10319e-173	-0.261	down
EIF3L	1.22442e-177	-1.20435	0.155	0.609	2.37538e-173	-0.454	down
TEX261	1.22634e-177	-1.29034	0.095	0.504	2.37911e-173	-0.409	down
TNKS2	1.28367e-177	1.04714	0.937	0.787	2.49033e-173	0.15	up
GAS7	1.28874e-177	-1.64928	0.142	0.584	2.50015e-173	-0.442	down
HEY1	2.6073e-177	-3.31733	0.01	0.281	5.05815e-173	-0.271	down
RPL26L1	3.43868e-177	-1.10413	0.088	0.491	6.67104e-173	-0.403	down
ARHGEF28	4.34019e-177	1.23239	0.899	0.74	8.41997e-173	0.159	up
ENSBTAG00000046623	5.07358e-177	-2.28299	0.012	0.289	9.84274e-173	-0.277	down
TCN2	6.2315e-177	-2.35155	0.029	0.339	1.20891e-172	-0.31	down
PLAGL1	7.26674e-177	3.73995	0.503	0.083	1.40975e-172	0.42	up
ENSBTAG00000045937	1.14828e-176	-2.14529	0.024	0.327	2.22767e-172	-0.303	down
CDC34	2.15399e-176	-0.954837	0.148	0.62	4.17874e-172	-0.472	ns
SYT9	4.27525e-176	5.02493	0.498	0.097	8.29398e-172	0.401	up
ZNF704	5.93267e-176	-2.0931	0.062	0.419	1.15094e-171	-0.357	down
VMA21	6.37126e-176	-1.44909	0.069	0.445	1.23603e-171	-0.376	down
GRPEL1	6.84386e-176	-1.68408	0.044	0.381	1.32771e-171	-0.337	down
YIF1A	7.27869e-176	-1.09239	0.076	0.463	1.41207e-171	-0.387	down
PNP	7.33678e-176	-1.38143	0.26	0.72	1.42333e-171	-0.46	down
SLC25A11	7.49541e-176	-1.40808	0.055	0.412	1.45411e-171	-0.357	down
ENSBTAG00000048722	8.11773e-176	-2.23994	0.014	0.295	1.57484e-171	-0.281	down
IRF7	1.06549e-175	-2.54889	0.028	0.333	2.06705e-171	-0.305	down
PDZK1	1.06804e-175	-1.37347	0.117	0.541	2.072e-171	-0.424	down
AK2	1.22288e-175	-1.44673	0.085	0.474	2.37239e-171	-0.389	down
CLTB	1.48076e-175	-1.158	0.104	0.524	2.87268e-171	-0.42	down
ENSBTAG00000053459	1.88223e-175	-1.42087	0.056	0.413	3.65152e-171	-0.357	down
H2AZ1	1.89857e-175	-1.70608	0.225	0.666	3.68322e-171	-0.441	down
TRIM71	2.14117e-175	2.35599	0.722	0.497	4.15386e-171	0.225	up
LYSET	5.19886e-175	-2.27505	0.017	0.303	1.00858e-170	-0.286	down
NANS	5.24419e-175	-1.16827	0.077	0.461	1.01737e-170	-0.384	down
TMEM92	5.61257e-175	-1.45423	0.038	0.364	1.08884e-170	-0.326	down
ATP1B1	7.30255e-175	-1.56572	0.266	0.717	1.41669e-170	-0.451	down
POLR2E	7.52971e-175	-1.26347	0.095	0.501	1.46076e-170	-0.406	down
PUF60	8.60168e-175	-1.17352	0.142	0.59	1.66873e-170	-0.448	down
SIPA1L1	2.69695e-174	2.00691	0.77	0.581	5.23209e-170	0.189	up
COX6B2	2.69972e-174	-3.59738	0.002	0.252	5.23746e-170	-0.25	down
TOR1A	2.80128e-174	-1.28738	0.091	0.491	5.43449e-170	-0.4	down
PSMG2	3.10362e-174	-1.4599	0.054	0.406	6.02102e-170	-0.352	down
SNAPIN	3.4025e-174	-1.6514	0.032	0.347	6.60085e-170	-0.315	down
TM4SF1	9.19441e-174	-2.55266	0.122	0.514	1.78372e-169	-0.392	down
LSM1	9.65725e-174	-1.1163	0.066	0.437	1.87351e-169	-0.371	down
ANLN	1.53391e-173	3.0101	0.682	0.453	2.97578e-169	0.229	up
FHDC1	1.82523e-173	2.84481	0.618	0.256	3.54095e-169	0.362	up
ARPC1B	2.79935e-173	-1.16505	0.139	0.586	5.43074e-169	-0.447	down
ANTKMT	3.03843e-173	-1.13738	0.094	0.496	5.89455e-169	-0.402	down
HMGN1	3.79681e-173	-1.27878	0.458	0.819	7.36582e-169	-0.361	down
GMPPB	5.11864e-173	-1.72293	0.034	0.351	9.93016e-169	-0.317	down
ATG101	5.67491e-173	-1.56686	0.037	0.358	1.10093e-168	-0.321	down
CBL	5.98026e-173	1.22222	0.896	0.846	1.16017e-168	0.05	ns
PRADC1	6.24234e-173	-1.71888	0.032	0.344	1.21101e-168	-0.312	down
FDX1	6.75331e-173	1.66873	0.82	0.747	1.31014e-168	0.073	ns
JTB	8.51488e-173	-1.04397	0.133	0.571	1.65189e-168	-0.438	down
MARCKS	8.72454e-173	-1.36791	0.178	0.631	1.69256e-168	-0.453	down
IKBIP	1.2035e-172	-1.54606	0.038	0.363	2.33479e-168	-0.325	down
TMEM126A	1.79301e-172	-1.5462	0.05	0.392	3.47844e-168	-0.342	down
CMTM8	2.02276e-172	-1.19918	0.322	0.83	3.92416e-168	-0.508	down
F2R	2.08998e-172	-2.86198	0.007	0.268	4.05457e-168	-0.261	down
DHRS11	2.3399e-172	-1.58773	0.041	0.369	4.5394e-168	-0.328	down
PGD	3.87579e-172	-1.22763	0.175	0.634	7.51903e-168	-0.459	down
EBP	5.07219e-172	-1.31168	0.08	0.466	9.84005e-168	-0.386	down
GRAMD1B	5.74086e-172	3.26219	0.562	0.167	1.11373e-167	0.395	up
OAZ2	5.83435e-172	-1.65498	0.036	0.355	1.13186e-167	-0.319	down
MRPL9	5.8751e-172	-1.15883	0.08	0.463	1.13977e-167	-0.383	down
PTPN18	5.91816e-172	-2.16529	0.022	0.315	1.14812e-167	-0.293	down
PHF5A	6.073e-172	-1.1675	0.087	0.481	1.17816e-167	-0.394	down
SUPT20H	9.16661e-172	1.49555	0.834	0.755	1.77832e-167	0.079	ns
LAD1	1.25477e-171	-1.17983	0.147	0.599	2.43425e-167	-0.452	down
BBX	1.53101e-171	1.01775	0.946	0.925	2.97015e-167	0.021	ns
PHB2	1.83994e-171	-1.26494	0.116	0.533	3.56949e-167	-0.417	down
DDRGK1	2.52662e-171	-1.21176	0.085	0.479	4.90164e-167	-0.394	down
SMIM11	2.68426e-171	-1.77205	0.023	0.316	5.20747e-167	-0.293	down
UGT1A6	3.10932e-171	-4.56455	0.003	0.25	6.03209e-167	-0.247	down
RBM42	4.56024e-171	-1.0979	0.078	0.461	8.84686e-167	-0.383	down
SYAP1	5.96845e-171	-1.39701	0.072	0.443	1.15788e-166	-0.371	down
AKR7A2	6.08266e-171	-0.919123	0.076	0.455	1.18004e-166	-0.379	ns
AKR1A1	7.41133e-171	-1.77593	0.035	0.351	1.4378e-166	-0.316	down
MXD4	8.01771e-171	-1.99809	0.018	0.299	1.55543e-166	-0.281	down
CNBP	1.10798e-170	-1.34046	0.201	0.649	2.14948e-166	-0.448	down
ATRAID	1.32554e-170	-1.45604	0.046	0.378	2.57155e-166	-0.332	down
ZNF593	1.65184e-170	-1.4336	0.046	0.379	3.20457e-166	-0.333	down
NXT1	1.66673e-170	-1.62808	0.038	0.357	3.23346e-166	-0.319	down
TXNL4A	3.0742e-170	-1.47927	0.072	0.441	5.96395e-166	-0.369	down
MPV17L2	3.30752e-170	-1.28871	0.079	0.459	6.41658e-166	-0.38	down
WDR33	3.65825e-170	1.74369	0.788	0.731	7.09701e-166	0.057	ns
SLCO4C1	3.73142e-170	-1.99581	0.051	0.387	7.23895e-166	-0.336	down
GAREM1	4.06753e-170	1.50695	0.839	0.756	7.89101e-166	0.083	ns
BHLHE40	4.84699e-170	-2.07847	0.073	0.431	9.40317e-166	-0.358	down
CRIPT	5.30883e-170	-1.08164	0.065	0.43	1.02991e-165	-0.365	down
SERPINH1	6.45436e-170	-3.29746	0.011	0.275	1.25215e-165	-0.264	down
ADISSP	7.02126e-170	-1.17647	0.103	0.508	1.36212e-165	-0.405	down
UNC119	7.75265e-170	-2.3357	0.013	0.283	1.50401e-165	-0.27	down
SESTD1	1.01306e-169	-1.72342	0.104	0.501	1.96533e-165	-0.397	down
PRRC2C	1.22544e-169	1.22531	0.862	0.885	2.37735e-165	-0.023	ns
DRG1	1.39433e-169	-1.27401	0.074	0.447	2.705e-165	-0.373	down
IDH3G	1.55008e-169	-1.01618	0.078	0.459	3.00716e-165	-0.381	down
EDEM2	1.85819e-169	-1.122	0.097	0.502	3.60488e-165	-0.405	down
CD48	2.2563e-169	-1.80464	0.117	0.507	4.37722e-165	-0.39	down
PAXX	2.42776e-169	-1.14798	0.073	0.447	4.70985e-165	-0.374	down
ZPR1	2.47346e-169	-1.16958	0.067	0.433	4.79851e-165	-0.366	down
TMA7	2.68127e-169	-1.40474	0.232	0.671	5.20166e-165	-0.439	down
ZMYND8	3.41857e-169	1.32322	0.877	0.848	6.63202e-165	0.029	ns
NIBAN1	4.86532e-169	4.40054	0.47	0.069	9.43872e-165	0.401	up
EGFR	5.33817e-169	1.14436	0.932	0.901	1.0356e-164	0.031	ns
LSM8	6.12336e-169	-1.23021	0.083	0.467	1.18793e-164	-0.384	down
TMEM9B	1.15364e-168	-1.22741	0.083	0.466	2.23806e-164	-0.383	down
MCEE	1.55645e-168	-2.03344	0.013	0.283	3.01951e-164	-0.27	down
NTNG1	1.76202e-168	4.34426	0.49	0.093	3.41833e-164	0.397	up
SDHAF2	2.13053e-168	-1.12245	0.073	0.444	4.13324e-164	-0.371	down
TPM4	3.34245e-168	-1.53401	0.49	0.817	6.48435e-164	-0.327	down
ANAPC16	6.55583e-168	-1.80217	0.034	0.342	1.27183e-163	-0.308	down
NDUFA5	7.90223e-168	-1.12753	0.12	0.541	1.53303e-163	-0.421	down
IGF2BP3	1.22023e-167	1.3623	0.831	0.82	2.36725e-163	0.011	ns
LRRC59	1.68377e-167	-2.27146	0.02	0.303	3.26651e-163	-0.283	down
UBAC1	1.76702e-167	-0.985909	0.136	0.578	3.42802e-163	-0.442	ns
ACBD3	2.45721e-167	-1.17956	0.27	0.757	4.76699e-163	-0.487	down
NUDT16L1	2.89173e-167	-0.996658	0.082	0.465	5.60996e-163	-0.383	ns
GID8	4.08799e-167	-1.65731	0.039	0.357	7.93069e-163	-0.318	down
UBE2T	5.52652e-167	-1.87168	0.023	0.311	1.07215e-162	-0.288	down
CDYL2	6.29046e-167	1.91166	0.725	0.391	1.22035e-162	0.334	up
SNF8	9.39936e-167	-1.19176	0.093	0.483	1.82348e-162	-0.39	down
IDH3B	9.51376e-167	-1.55015	0.054	0.394	1.84567e-162	-0.34	down
DDIT4	1.14852e-166	-2.61239	0.013	0.28	2.22812e-162	-0.267	down
SPTLC3	1.61802e-166	3.34228	0.578	0.221	3.13896e-162	0.357	up
ADH5	1.80616e-166	-1.84004	0.031	0.332	3.50395e-162	-0.301	down
NUPR1	2.03328e-166	-1.61051	0.183	0.615	3.94457e-162	-0.432	down
COPG1	2.45376e-166	-0.967813	0.12	0.545	4.76029e-162	-0.425	ns
ENTREP2	3.17402e-166	-1.29306	0.075	0.444	6.15759e-162	-0.369	down
SLC35A2	5.47949e-166	-1.81259	0.031	0.333	1.06302e-161	-0.302	down
SELENOF	6.01257e-166	-1.19258	0.198	0.654	1.16644e-161	-0.456	down
C6H4orf3	6.71201e-166	-1.23311	0.178	0.619	1.30213e-161	-0.441	down
CFTR	7.8762e-166	6.42532	0.394	0.007	1.52798e-161	0.387	up
GFER	9.6387e-166	-1.8016	0.02	0.3	1.86991e-161	-0.28	down
SERPINB1	1.00646e-165	-1.83683	0.029	0.325	1.95254e-161	-0.296	down
PRRG4	1.30862e-165	-1.44142	0.093	0.479	2.53872e-161	-0.386	down
GTF2A2	1.4733e-165	-1.25934	0.08	0.454	2.85821e-161	-0.374	down
SMIM7	1.59943e-165	-1.09427	0.14	0.577	3.10289e-161	-0.437	down
TERF2IP	1.64442e-165	-1.45529	0.041	0.359	3.19018e-161	-0.318	down
ANAPC15	1.72135e-165	-1.44555	0.029	0.328	3.33942e-161	-0.299	down
GSTO1	2.07408e-165	-1.60023	0.04	0.357	4.02372e-161	-0.317	down
SEC11A	2.14721e-165	-1.21697	0.343	0.777	4.16559e-161	-0.434	down
PLGRKT	2.19818e-165	-1.11546	0.141	0.573	4.26447e-161	-0.432	down
ID1	2.37833e-165	-2.50038	0.021	0.302	4.61396e-161	-0.281	down
MGAT4B	2.49997e-165	-1.19757	0.058	0.405	4.84995e-161	-0.347	down
CD2BP2	2.55109e-165	-1.53655	0.044	0.367	4.94911e-161	-0.323	down
TIMM23	2.56e-165	-0.934127	0.107	0.513	4.9664e-161	-0.406	ns
ANP32E	2.67756e-165	-1.16271	0.115	0.523	5.19447e-161	-0.408	down
LIN7C	3.34683e-165	-1.44441	0.084	0.459	6.49285e-161	-0.375	down
SFXN4	5.15281e-165	-1.77504	0.04	0.355	9.99644e-161	-0.315	down
USP32	5.21952e-165	1.66234	0.802	0.668	1.01259e-160	0.134	ns
NDUFB3	5.37364e-165	-1.0834	0.152	0.594	1.04249e-160	-0.442	down
LGALS3	5.412e-165	-1.4505	0.52	0.841	1.04993e-160	-0.321	down
FUNDC1	5.64353e-165	-2.4705	0.013	0.275	1.09484e-160	-0.262	down
NUCB1	6.5871e-165	-1.21069	0.128	0.55	1.2779e-160	-0.422	down
NELFE	8.0284e-165	-1.33578	0.058	0.401	1.55751e-160	-0.343	down
TPRG1L	1.05414e-164	-0.971982	0.133	0.562	2.04504e-160	-0.429	ns
NDUFA9	1.13439e-164	-0.939393	0.123	0.547	2.20072e-160	-0.424	ns
EMC3	1.25153e-164	-1.12268	0.162	0.611	2.42797e-160	-0.449	down
CCT3	1.32647e-164	-1.24027	0.209	0.661	2.57334e-160	-0.452	down
SRPRA	2.33077e-164	-1.06482	0.133	0.567	4.5217e-160	-0.434	down
SLC1A1	2.39167e-164	-4.39195	0.004	0.245	4.63984e-160	-0.241	down
CISD2	5.79602e-164	-1.67054	0.04	0.354	1.12443e-159	-0.314	down
SPCS2	7.06544e-164	-1.26552	0.239	0.686	1.37069e-159	-0.447	down
ZMAT2	7.0816e-164	-1.26844	0.076	0.445	1.37383e-159	-0.369	down
HHAT	1.01213e-163	3.37992	0.535	0.147	1.96354e-159	0.388	up
PDIA5	1.06454e-163	-1.35396	0.038	0.35	2.06521e-159	-0.312	down
IMPDH2	1.17097e-163	-1.23526	0.108	0.509	2.27169e-159	-0.401	down
ENSBTAG00000049294	1.42141e-163	-2.20673	0.012	0.271	2.75753e-159	-0.259	down
PCK2	1.55237e-163	-2.18373	0.012	0.273	3.01159e-159	-0.261	down
MPV17	1.56506e-163	-1.37509	0.054	0.39	3.03622e-159	-0.336	down
LSM5	2.56895e-163	-1.10279	0.129	0.547	4.98376e-159	-0.418	down
PEX11A	2.62164e-163	-2.13534	0.022	0.303	5.08598e-159	-0.281	down
LYPD6	2.62504e-163	-1.75006	0.144	0.565	5.09257e-159	-0.421	down
SEC61A1	3.27118e-163	-1.22093	0.222	0.677	6.34608e-159	-0.455	down
RNF144A	6.94811e-163	-3.60498	0.015	0.278	1.34793e-158	-0.263	down
TRAM1	1.00183e-162	-1.04814	0.196	0.67	1.94356e-158	-0.474	down
ESPN	1.01844e-162	-2.37005	0.016	0.283	1.97577e-158	-0.267	down
SMIM20	1.02034e-162	-1.32022	0.051	0.382	1.97946e-158	-0.331	down
KLF10	1.09117e-162	-1.64986	0.066	0.413	2.11687e-158	-0.347	down
ISCU	1.28857e-162	-1.11493	0.064	0.417	2.49984e-158	-0.353	down
MTX1	1.36568e-162	-1.44714	0.045	0.366	2.64942e-158	-0.321	down
ASPH	1.85954e-162	-1.47245	0.124	0.529	3.60751e-158	-0.405	down
SATB2	1.9966e-162	-1.28894	0.235	0.709	3.8734e-158	-0.474	down
EIF4EBP1	2.09106e-162	-1.14005	0.115	0.525	4.05666e-158	-0.41	down
FMR1	2.11682e-162	1.72613	0.768	0.617	4.10662e-158	0.151	up
POLR2I	2.1209e-162	-1.26828	0.051	0.381	4.11454e-158	-0.33	down
PGLS	2.18077e-162	-0.926854	0.122	0.541	4.2307e-158	-0.419	ns
KXD1	2.87765e-162	-0.931235	0.13	0.563	5.58264e-158	-0.433	ns
VEGFB	3.83435e-162	-1.22041	0.057	0.397	7.43864e-158	-0.34	down
GATD3	4.35834e-162	-0.75335	0.119	0.539	8.45518e-158	-0.42	ns
POLR3K	5.24121e-162	-1.39556	0.041	0.355	1.0168e-157	-0.314	down
SLC44A1	6.30253e-162	2.20676	0.738	0.635	1.22269e-157	0.103	ns
GNB1L	1.50492e-161	-1.18024	0.073	0.434	2.91954e-157	-0.361	down
ILK	3.07623e-161	-1.20925	0.067	0.419	5.96789e-157	-0.352	down
TRAPPC4	3.18367e-161	-1.01798	0.075	0.442	6.17632e-157	-0.367	down
CHCHD4	4.01682e-161	-1.47785	0.035	0.337	7.79263e-157	-0.302	down
SLC4A5	4.5846e-161	2.56523	0.672	0.431	8.89412e-157	0.241	up
ENO1	6.25721e-161	-1.76872	0.332	0.725	1.2139e-156	-0.393	down
SAR1A	6.35634e-161	-1.26527	0.065	0.412	1.23313e-156	-0.347	down
MAP3K20	7.91445e-161	2.04902	0.742	0.604	1.5354e-156	0.138	ns
PAWR	1.25623e-160	1.45088	0.833	0.843	2.43708e-156	-0.01	ns
ELOF1	1.39171e-160	-1.28161	0.045	0.365	2.69992e-156	-0.32	down
RAB24	1.397e-160	-1.37962	0.115	0.515	2.71018e-156	-0.4	down
IL18	1.7234e-160	-2.94259	0.007	0.252	3.34339e-156	-0.245	down
TIMM44	1.94825e-160	-1.0853	0.112	0.515	3.7796e-156	-0.403	down
ENSBTAG00000014449	2.39568e-160	-2.93782	0.009	0.255	4.64761e-156	-0.246	down
CITED1	2.42984e-160	-1.96562	0.269	0.661	4.71389e-156	-0.392	down
TBC1D5	2.68497e-160	1.58404	0.81	0.736	5.20884e-156	0.074	ns
SBDS	3.22564e-160	-1.39094	0.07	0.421	6.25774e-156	-0.351	down
UROD	3.35522e-160	-1.43893	0.035	0.337	6.50914e-156	-0.302	down
DPH3	4.55901e-160	-1.19642	0.062	0.407	8.84449e-156	-0.345	down
SPINT1	5.87326e-160	-1.1586	0.178	0.632	1.13941e-155	-0.454	down
DNAJC3	6.33831e-160	-1.12932	0.191	0.65	1.22963e-155	-0.459	down
SLC35B2	7.38267e-160	-1.21932	0.075	0.435	1.43224e-155	-0.36	down
PPP1R18	9.07737e-160	-2.23095	0.011	0.265	1.76101e-155	-0.254	down
COA4	9.55046e-160	-1.86759	0.022	0.297	1.85279e-155	-0.275	down
PDE1B	9.73253e-160	4.38395	0.471	0.091	1.88811e-155	0.38	up
YIPF3	1.23636e-159	-0.99617	0.113	0.52	2.39853e-155	-0.407	ns
GNAI2	1.39803e-159	-1.07929	0.141	0.569	2.71217e-155	-0.428	down
TECR	1.99531e-159	-1.34667	0.198	0.635	3.87091e-155	-0.437	down
TRRAP	2.20712e-159	2.79397	0.649	0.381	4.28181e-155	0.268	up
SPR	2.21764e-159	-2.53707	0.014	0.271	4.30222e-155	-0.257	down
FBXL20	2.32181e-159	1.40466	0.856	0.746	4.50432e-155	0.11	ns
PEDS1	2.84852e-159	-0.99724	0.131	0.556	5.52613e-155	-0.425	ns
YWHAB	3.00469e-159	-1.19083	0.498	0.826	5.8291e-155	-0.328	down
DLG5	3.0702e-159	1.28684	0.869	0.808	5.95619e-155	0.061	ns
SH3KBP1	5.63419e-159	-3.56287	0.006	0.245	1.09303e-154	-0.239	down
FGD4	5.67219e-159	0.829536	0.971	0.969	1.1004e-154	0.002	ns
CECR2	5.83558e-159	2.42779	0.671	0.405	1.1321e-154	0.266	up
PFDN2	6.15186e-159	-1.11592	0.178	0.619	1.19346e-154	-0.441	down
PCBP1	6.20893e-159	-1.33253	0.052	0.379	1.20453e-154	-0.327	down
DOK4	9.4411e-159	-2.791	0.007	0.249	1.83157e-154	-0.242	down
ACO1	1.0343e-158	-1.1114	0.153	0.593	2.00653e-154	-0.44	down
KHDRBS3	1.14679e-158	-1.11014	0.236	0.717	2.22478e-154	-0.481	down
DCN	2.23422e-158	-2.71784	0.018	0.283	4.33438e-154	-0.265	down
ATAD2.1	2.29626e-158	2.81513	0.663	0.44	4.45474e-154	0.223	up
MRPL10	2.42138e-158	-1.43744	0.032	0.326	4.69747e-154	-0.294	down
SLC4A2	2.52296e-158	-1.07575	0.07	0.421	4.89455e-154	-0.351	down
LAMTOR3	4.87206e-158	-0.995749	0.089	0.468	9.4518e-154	-0.379	ns
MRPS34	7.55013e-158	-2.0804	0.013	0.266	1.46472e-153	-0.253	down
COA8	8.4969e-158	-1.10344	0.044	0.359	1.6484e-153	-0.315	down
CD164	9.37709e-158	-1.21467	0.23	0.687	1.81916e-153	-0.457	down
ENSBTAG00000005997	1.39474e-157	2.44303	0.69	0.499	2.70579e-153	0.191	up
RAB11B	1.50366e-157	-1.40934	0.045	0.359	2.9171e-153	-0.314	down
TMEM179B	1.94375e-157	-1.22722	0.048	0.369	3.77088e-153	-0.321	down
CHMP4A	2.03696e-157	-0.993528	0.066	0.412	3.9517e-153	-0.346	ns
FKBP8	2.3218e-157	-0.991725	0.07	0.424	4.50429e-153	-0.354	ns
UFM1	3.16736e-157	-1.23255	0.066	0.412	6.14469e-153	-0.346	down
NME6	3.21106e-157	-1.55312	0.025	0.303	6.22946e-153	-0.278	down
TCTA	6.26564e-157	-1.39292	0.035	0.333	1.21553e-152	-0.298	down
NDUFA10	6.46271e-157	-1.00899	0.143	0.569	1.25377e-152	-0.426	down
MMP15	9.08625e-157	-2.12736	0.018	0.282	1.76273e-152	-0.264	down
AIFM2	9.727e-157	-2.04115	0.018	0.282	1.88704e-152	-0.264	down
IGF2	9.77229e-157	-2.27276	0.042	0.344	1.89582e-152	-0.302	down
HEXB	1.00178e-156	-1.24771	0.098	0.478	1.94346e-152	-0.38	down
ERO1A	1.01204e-156	-1.69551	0.072	0.419	1.96336e-152	-0.347	down
MPST	1.36077e-156	-2.12632	0.016	0.275	2.6399e-152	-0.259	down
MMADHC	1.66607e-156	-0.964559	0.169	0.62	3.23218e-152	-0.451	ns
MED10	6.61555e-156	-1.11278	0.073	0.428	1.28342e-151	-0.355	down
ELOC	7.2389e-156	-1.16574	0.177	0.613	1.40435e-151	-0.436	down
MRPL24	8.99402e-156	-2.11359	0.018	0.279	1.74484e-151	-0.261	down
GON7	1.03304e-155	-1.86651	0.024	0.299	2.00409e-151	-0.275	down
CLPP	1.43214e-155	-1.28899	0.044	0.355	2.77835e-151	-0.311	down
MCRIP1	1.91598e-155	-0.816772	0.126	0.542	3.717e-151	-0.416	ns
MAF1	2.0499e-155	-0.953656	0.092	0.47	3.9768e-151	-0.378	ns
CLCC1	2.24202e-155	-1.36636	0.085	0.449	4.34952e-151	-0.364	down
PUM2	2.59952e-155	1.20661	0.867	0.86	5.04307e-151	0.007	ns
TBC1D4	2.92817e-155	1.82291	0.684	0.303	5.68064e-151	0.381	up
MDFI	4.57058e-155	-2.83166	0.003	0.229	8.86693e-151	-0.226	down
COX17	5.16438e-155	-1.49141	0.049	0.363	1.00189e-150	-0.314	down
MYCBP	6.09109e-155	-0.884813	0.076	0.432	1.18167e-150	-0.356	ns
RMDN2	8.74124e-155	3.49644	0.565	0.239	1.6958e-150	0.326	up
MSN	8.91788e-155	-0.976019	0.181	0.624	1.73007e-150	-0.443	ns
NIPBL	9.29985e-155	1.32219	0.835	0.84	1.80417e-150	-0.005	ns
SHC1	1.31286e-154	-0.944823	0.134	0.553	2.54694e-150	-0.419	ns
FAM136A	1.56515e-154	-1.44683	0.024	0.296	3.0364e-150	-0.272	down
C11H9orf78	1.59054e-154	-0.82278	0.079	0.441	3.08564e-150	-0.362	ns
ADRM1	1.82296e-154	-1.03557	0.089	0.459	3.53654e-150	-0.37	down
PIGW	2.64103e-154	-1.73618	0.031	0.316	5.12361e-150	-0.285	down
CCT7	2.99011e-154	-1.12758	0.123	0.528	5.80081e-150	-0.405	down
PINK1	3.58069e-154	-1.84367	0.022	0.29	6.94653e-150	-0.268	down
TIMM50	4.06641e-154	-1.20399	0.048	0.362	7.88884e-150	-0.314	down
NCLN	4.2374e-154	-0.952409	0.105	0.495	8.22055e-150	-0.39	ns
CRYZ	4.60415e-154	-1.66584	0.025	0.3	8.93206e-150	-0.275	down
SLC39A11	4.79841e-154	-1.29678	0.296	0.778	9.30892e-150	-0.482	down
DCTPP1	5.27776e-154	-1.83329	0.021	0.287	1.02388e-149	-0.266	down
CDIPT	6.25923e-154	-1.24917	0.036	0.332	1.21429e-149	-0.296	down
CKAP4	6.4869e-154	-1.18288	0.084	0.45	1.25846e-149	-0.366	down
F2RL1	6.5012e-154	-1.98862	0.013	0.263	1.26123e-149	-0.25	down
ZNF652	6.81373e-154	3.54192	0.517	0.149	1.32186e-149	0.368	up
TNFRSF1A	1.52394e-153	-1.31261	0.109	0.492	2.95644e-149	-0.383	down
MFAP1	1.71394e-153	-1.14399	0.054	0.378	3.32504e-149	-0.324	down
NUDT2	1.76427e-153	-1.93754	0.022	0.289	3.42268e-149	-0.267	down
CARHSP1	2.51832e-153	-1.14499	0.149	0.57	4.88554e-149	-0.421	down
PDPN	2.84086e-153	-3.08821	0.074	0.397	5.51128e-149	-0.323	down
CREB3	2.8928e-153	-1.34569	0.037	0.332	5.61204e-149	-0.295	down
MYBL1	3.13253e-153	3.16422	0.602	0.315	6.0771e-149	0.287	up
MPLKIP	3.41072e-153	-1.47317	0.043	0.347	6.61679e-149	-0.304	down
TCP1	3.44452e-153	-1.13017	0.162	0.588	6.68237e-149	-0.426	down
ABCG2	3.59866e-153	-1.20031	0.351	0.795	6.9814e-149	-0.444	down
CRTAP	4.41031e-153	-1.18018	0.078	0.431	8.556e-149	-0.353	down
OTUB1	5.55148e-153	-0.883191	0.139	0.558	1.07699e-148	-0.419	ns
ABCA3	7.07707e-153	-1.09522	0.099	0.477	1.37295e-148	-0.378	down
MRPL15	1.02064e-152	-1.97164	0.019	0.278	1.98003e-148	-0.259	down
PDLIM1	1.52193e-152	-2.1875	0.035	0.321	2.95255e-148	-0.286	down
SRI	1.54676e-152	-0.976201	0.091	0.463	3.00071e-148	-0.372	ns
RWDD4	1.76349e-152	-1.02379	0.081	0.439	3.42117e-148	-0.358	down
SMARCB1	1.98481e-152	-1.0375	0.091	0.463	3.85053e-148	-0.372	down
HSPD1	1.98588e-152	-1.33007	0.333	0.747	3.85262e-148	-0.414	down
RBIS	2.13717e-152	-1.22679	0.054	0.375	4.14611e-148	-0.321	down
RBM15B	2.70762e-152	-2.12753	0.024	0.292	5.25279e-148	-0.268	down
IGFL1	2.81516e-152	-1.52073	0.069	0.405	5.46142e-148	-0.336	down
KDSR	2.87473e-152	-1.188	0.089	0.453	5.57698e-148	-0.364	down
UBE2L3	3.26395e-152	-1.11249	0.226	0.669	6.33206e-148	-0.443	down
FBXO11	4.18939e-152	1.25745	0.857	0.855	8.12741e-148	0.002	ns
PARP1	4.76747e-152	-1.14639	0.216	0.658	9.24888e-148	-0.442	down
TLCD3A	8.74685e-152	-1.91729	0.036	0.325	1.69689e-147	-0.289	down
EIF2S2	1.11466e-151	-1.24123	0.249	0.675	2.16244e-147	-0.426	down
DDX39A	1.153e-151	-1.16208	0.131	0.535	2.23682e-147	-0.404	down
SEPTIN8	1.45935e-151	-0.915693	0.135	0.552	2.83113e-147	-0.417	ns
GANAB	1.47561e-151	-0.866135	0.151	0.587	2.86267e-147	-0.436	ns
PRDX3	2.41139e-151	-1.10833	0.065	0.399	4.67811e-147	-0.334	down
AOPEP	3.5597e-151	1.20253	0.855	0.781	6.90582e-147	0.074	ns
ENSBTAG00000052790	4.24644e-151	-1.36836	0.039	0.335	8.23809e-147	-0.296	down
TPP1	5.13287e-151	-1.84302	0.025	0.293	9.95777e-147	-0.268	down
ENSBTAG00000027213	5.56225e-151	-2.43853	0.008	0.243	1.07908e-146	-0.235	down
TMEM203	7.04074e-151	-2.1845	0.012	0.255	1.3659e-146	-0.243	down
LIPH	9.89767e-151	-1.38745	0.086	0.441	1.92015e-146	-0.355	down
NOLC1	1.06882e-150	-0.990849	0.089	0.456	2.0735e-146	-0.367	ns
TMED10	1.08026e-150	-1.02622	0.268	0.73	2.0957e-146	-0.462	down
SMPDL3A	1.41317e-150	-2.19838	0.064	0.381	2.74156e-146	-0.317	down
TFAP2C	1.58055e-150	-0.789422	0.139	0.562	3.06628e-146	-0.423	ns
PEMT	1.59915e-150	-1.49562	0.033	0.317	3.10235e-146	-0.284	down
ACADM	1.62001e-150	-1.70197	0.044	0.345	3.14281e-146	-0.301	down
NFATC3	1.83428e-150	1.60868	0.789	0.673	3.5585e-146	0.116	ns
MRPL18	2.5398e-150	-0.997317	0.071	0.414	4.9272e-146	-0.343	ns
CSRNP1	3.49663e-150	-2.51476	0.015	0.263	6.78346e-146	-0.248	down
RCN2	3.71342e-150	-1.07317	0.127	0.529	7.20403e-146	-0.402	down
TMOD3	4.04195e-150	-1.15604	0.222	0.685	7.84139e-146	-0.463	down
ZNF292	4.05821e-150	1.69528	0.761	0.673	7.87292e-146	0.088	ns
GTF2H5	4.60834e-150	-0.931593	0.099	0.476	8.94019e-146	-0.377	ns
MCRIP2	5.22194e-150	-1.2777	0.077	0.423	1.01306e-145	-0.346	down
POLR1E	5.48941e-150	-1.92861	0.029	0.305	1.06494e-145	-0.276	down
MTRFR	5.8205e-150	-1.62142	0.038	0.33	1.12918e-145	-0.292	down
SSU72	6.28816e-150	-1.08267	0.156	0.577	1.2199e-145	-0.421	down
ILF2	7.42866e-150	-0.944026	0.148	0.573	1.44116e-145	-0.425	ns
MAN2A1	1.16046e-149	1.39016	0.835	0.837	2.25129e-145	-0.002	ns
UNC80	1.35233e-149	6.44157	0.367	0.009	2.62353e-145	0.358	up
ENSBTAG00000053119	1.83791e-149	1.75909	0.782	0.73	3.56555e-145	0.052	ns
DISP1	1.89321e-149	2.89476	0.596	0.276	3.67282e-145	0.32	up
KMT2C	1.92399e-149	0.827468	0.966	0.948	3.73253e-145	0.018	ns
B4GALT3	2.17608e-149	-0.981545	0.078	0.427	4.22159e-145	-0.349	ns
RAB8A	2.20842e-149	-1.14582	0.109	0.494	4.28433e-145	-0.385	down
SARS1	2.26951e-149	-1.04621	0.075	0.423	4.40285e-145	-0.348	down
SSBP1	2.32134e-149	-0.927042	0.068	0.407	4.50339e-145	-0.339	ns
MRPS36	2.35203e-149	-0.861216	0.077	0.429	4.56293e-145	-0.352	ns
JUN	4.17376e-149	-1.42593	0.485	0.859	8.0971e-145	-0.374	down
AHSA1	5.43617e-149	-1.06934	0.103	0.48	1.05462e-144	-0.377	down
MAB21L3	7.03762e-149	-2.03781	0.032	0.311	1.3653e-144	-0.279	down
MAPK4	1.02176e-148	1.84132	0.749	0.6	1.98222e-144	0.149	ns
QARS1	1.37758e-148	-0.775699	0.082	0.439	2.67251e-144	-0.357	ns
DAPP1	1.37934e-148	-2.17357	0.034	0.313	2.67593e-144	-0.279	down
HSP90AA1	1.46185e-148	-0.977598	0.724	0.917	2.83599e-144	-0.193	ns
BLNK	1.96382e-148	-2.93994	0.011	0.248	3.80981e-144	-0.237	down
TRIM36	2.46543e-148	-2.00143	0.034	0.315	4.78294e-144	-0.281	down
MGAT2	3.43374e-148	-2.13375	0.016	0.265	6.66145e-144	-0.249	down
FAM210B	3.54162e-148	-1.52789	0.054	0.366	6.87075e-144	-0.312	down
MIX23	3.67314e-148	-1.02985	0.067	0.402	7.12589e-144	-0.335	down
TMEM219	3.82134e-148	-1.05976	0.086	0.446	7.4134e-144	-0.36	down
ENSBTAG00000027610	4.37069e-148	-3.164	0.003	0.219	8.47913e-144	-0.216	down
WDR7	5.83489e-148	2.28636	0.701	0.525	1.13197e-143	0.176	up
RHOG	6.7833e-148	-1.66825	0.027	0.297	1.31596e-143	-0.27	down
FAHD1	6.96742e-148	-1.76395	0.02	0.276	1.35168e-143	-0.256	down
SSR1	8.4814e-148	-1.19603	0.269	0.7	1.64539e-143	-0.431	down
CTSH	1.02173e-147	-3.28414	0.006	0.231	1.98215e-143	-0.225	down
MCTP2	1.07313e-147	-2.71576	0.013	0.254	2.08188e-143	-0.241	down
F2RL2	1.18729e-147	-1.4498	0.107	0.474	2.30334e-143	-0.367	down
PPP1R35	1.25276e-147	-0.639605	0.097	0.473	2.43035e-143	-0.376	ns
AARSD1	1.49879e-147	-1.04194	0.061	0.385	2.90765e-143	-0.324	down
GNAL	1.71148e-147	-0.846737	0.094	0.46	3.32027e-143	-0.366	ns
PROM1	2.38617e-147	-0.797432	0.063	0.393	4.62916e-143	-0.33	ns
TOMM40	3.70418e-147	-0.939678	0.063	0.391	7.18611e-143	-0.328	ns
NOL4	3.71627e-147	5.53218	0.387	0.028	7.20957e-143	0.359	up
TRIB1	4.16401e-147	-2.43249	0.014	0.254	8.07818e-143	-0.24	down
HM13	6.37147e-147	-0.87451	0.171	0.608	1.23606e-142	-0.437	ns
ERLEC1	6.41666e-147	-1.06424	0.094	0.461	1.24483e-142	-0.367	down
C3H1orf43	7.1736e-147	-0.814074	0.091	0.457	1.39168e-142	-0.366	ns
CGNL1	1.52626e-146	-1.26318	0.113	0.493	2.96095e-142	-0.38	down
SLC25A39	1.7572e-146	-1.30882	0.046	0.346	3.40896e-142	-0.3	down
KLF6	2.03385e-146	-1.29451	0.481	0.865	3.94568e-142	-0.384	down
HMOX2	2.10188e-146	-1.06172	0.17	0.599	4.07765e-142	-0.429	down
MRTO4	2.96678e-146	-1.15553	0.072	0.406	5.75556e-142	-0.334	down
WFDC2	3.07996e-146	-2.621	0.028	0.293	5.97512e-142	-0.265	down
ATIC	3.32613e-146	-0.958033	0.144	0.555	6.4527e-142	-0.411	ns
TMEM70	3.57632e-146	-1.25449	0.037	0.323	6.93807e-142	-0.286	down
TSR3	3.65741e-146	-1.48532	0.034	0.313	7.09537e-142	-0.279	down
BNIP3L	4.48079e-146	-1.02906	0.079	0.425	8.69273e-142	-0.346	down
MAP3K5	5.12755e-146	2.08137	0.699	0.475	9.94746e-142	0.224	up
ENSBTAG00000011704	6.99877e-146	-2.06581	0.009	0.239	1.35776e-141	-0.23	down
VPS36	9.01816e-146	-0.845829	0.165	0.595	1.74952e-141	-0.43	ns
ENSBTAG00000016391	1.39723e-145	-2.56049	0.009	0.237	2.71062e-141	-0.228	down
PCDH1	1.40153e-145	-0.992108	0.081	0.428	2.71898e-141	-0.347	ns
INHCA	1.49226e-145	-1.37585	0.103	0.466	2.89498e-141	-0.363	down
GFUS	1.79724e-145	-0.880237	0.069	0.401	3.48665e-141	-0.332	ns
ACAA2	1.88374e-145	-0.989727	0.069	0.403	3.65445e-141	-0.334	ns
ZFYVE21	2.33993e-145	-1.4261	0.036	0.318	4.53947e-141	-0.282	down
MDH1	2.45762e-145	-1.15966	0.224	0.647	4.76779e-141	-0.423	down
AIF1	2.58166e-145	-1.34384	0.239	0.659	5.00842e-141	-0.42	down
ENSBTAG00000038438	2.69826e-145	-2.28107	0.014	0.253	5.23462e-141	-0.239	down
ENSBTAG00000020684	3.66294e-145	-1.28601	0.076	0.41	7.10611e-141	-0.334	down
RPL23A	3.79136e-145	-1.32741	0.435	0.775	7.35524e-141	-0.34	down
CLNS1A	3.80203e-145	-1.05454	0.094	0.458	7.37595e-141	-0.364	down
RASGEF1B	4.47707e-145	-1.63399	0.093	0.442	8.68552e-141	-0.349	down
POLDIP2	5.40599e-145	-1.19537	0.037	0.321	1.04876e-140	-0.284	down
SLC35F6	5.86091e-145	-1.14445	0.05	0.355	1.13702e-140	-0.305	down
ACP1	6.52682e-145	-0.878473	0.121	0.512	1.2662e-140	-0.391	ns
SDHC	7.309e-145	-1.10018	0.201	0.633	1.41795e-140	-0.432	down
SLC35G1	8.02065e-145	-3.04301	0.026	0.282	1.55601e-140	-0.256	down
SLC29A1	8.95046e-145	-1.81763	0.021	0.275	1.73639e-140	-0.254	down
PLOD2	1.10973e-144	-2.93173	0.011	0.244	2.15288e-140	-0.233	down
PARD3B	1.13104e-144	1.35855	0.839	0.801	2.19422e-140	0.038	ns
POLR1F	1.17407e-144	-1.08038	0.051	0.356	2.2777e-140	-0.305	down
SLC20A1	1.81581e-144	-2.03859	0.123	0.493	3.52268e-140	-0.37	down
TMEM98	1.94513e-144	-1.9239	0.024	0.283	3.77356e-140	-0.259	down
CBR4	2.05284e-144	-0.895232	0.098	0.462	3.98252e-140	-0.364	ns
EBAG9	2.19645e-144	-1.35318	0.056	0.367	4.26111e-140	-0.311	down
BOLA3	2.31619e-144	-1.57267	0.031	0.301	4.49341e-140	-0.27	down
NT5DC2	2.64643e-144	-3.80335	0.003	0.216	5.13407e-140	-0.213	down
DENND1A	3.43815e-144	1.05319	0.884	0.879	6.67002e-140	0.005	ns
VWA1	4.41903e-144	-1.62017	0.032	0.303	8.57292e-140	-0.271	down
CLPTM1L	4.6907e-144	-0.90778	0.157	0.581	9.09996e-140	-0.424	ns
CHCHD7	4.76488e-144	-0.79269	0.117	0.508	9.24387e-140	-0.391	ns
RAB34	6.33681e-144	-0.829292	0.077	0.419	1.22934e-139	-0.342	ns
PSMA2	7.42641e-144	-0.967682	0.173	0.596	1.44072e-139	-0.423	ns
CDV3	7.50156e-144	-0.990455	0.23	0.681	1.4553e-139	-0.451	ns
TES	8.03432e-144	-1.1746	0.185	0.607	1.55866e-139	-0.422	down
DOLK	8.39891e-144	-1.9586	0.013	0.249	1.62939e-139	-0.236	down
GADD45B	1.04454e-143	-1.3846	0.049	0.347	2.02642e-139	-0.298	down
RPP25L	1.28724e-143	-1.35764	0.032	0.305	2.49724e-139	-0.273	down
PNO1	1.47493e-143	-1.32645	0.044	0.338	2.86136e-139	-0.294	down
LLPH	1.97446e-143	-1.08362	0.079	0.419	3.83046e-139	-0.34	down
PHF23	2.99102e-143	-1.61803	0.035	0.313	5.80257e-139	-0.278	down
TMSB4	3.19397e-143	-2.33554	0.025	0.283	6.1963e-139	-0.258	down
MAGED1	3.22846e-143	-0.898015	0.125	0.517	6.2632e-139	-0.392	ns
MED31	4.05377e-143	-1.29175	0.043	0.333	7.8643e-139	-0.29	down
SPINT2	4.43197e-143	-1.04303	0.515	0.845	8.59802e-139	-0.33	down
HNRNPH2	4.91862e-143	-1.10885	0.041	0.329	9.54212e-139	-0.288	down
PTPRJ	5.67567e-143	1.75938	0.763	0.625	1.10108e-138	0.138	ns
ORMDL2	6.8236e-143	-1.04854	0.134	0.527	1.32378e-138	-0.393	down
TMEM214	8.23911e-143	-0.896335	0.113	0.497	1.59839e-138	-0.384	ns
DAZAP2	9.17296e-143	-0.970154	0.097	0.461	1.77955e-138	-0.364	ns
SDHB	1.21257e-142	-0.991913	0.177	0.599	2.35239e-138	-0.422	ns
CTSA	1.33682e-142	-1.33346	0.256	0.682	2.59344e-138	-0.426	down
BCKDHA	1.3681e-142	-1.7257	0.025	0.283	2.65412e-138	-0.258	down
MAP1LC3B	1.37941e-142	-1.03671	0.115	0.493	2.67605e-138	-0.378	down
ELOVL1	1.39233e-142	-0.950403	0.065	0.388	2.70112e-138	-0.323	ns
LMO4	1.39477e-142	-1.54255	0.076	0.405	2.70585e-138	-0.329	down
VBP1	1.6628e-142	-0.912285	0.088	0.441	3.22583e-138	-0.353	ns
GSS	1.9308e-142	-1.83065	0.035	0.308	3.74576e-138	-0.273	down
TAF9	2.41726e-142	-0.963875	0.138	0.538	4.68949e-138	-0.4	ns
PDGFA	2.47606e-142	-1.95365	0.021	0.27	4.80356e-138	-0.249	down
SERTAD3	2.53382e-142	-0.96119	0.078	0.419	4.91562e-138	-0.341	ns
C1H3orf38	2.65821e-142	-1.50151	0.047	0.341	5.15693e-138	-0.294	down
SMURF1	3.3294e-142	1.19274	0.853	0.823	6.45903e-138	0.03	ns
HMGB1	3.83775e-142	-1.40916	0.436	0.778	7.44524e-138	-0.342	down
GRHL2	4.10645e-142	2.14585	0.689	0.487	7.96652e-138	0.202	up
CMBL	7.10361e-142	-1.48273	0.021	0.272	1.3781e-137	-0.251	down
PDS5A	7.65607e-142	1.59414	0.774	0.727	1.48528e-137	0.047	ns
SNRPC	9.72168e-142	-0.851619	0.151	0.559	1.88601e-137	-0.408	ns
SGMS2	1.11643e-141	1.22825	0.83	0.753	2.16588e-137	0.077	ns
LMAN1	1.66168e-141	-0.807352	0.12	0.509	3.22365e-137	-0.389	ns
TACR3	2.22937e-141	-3.0313	0.009	0.231	4.32498e-137	-0.222	down
RDH14	2.39013e-141	-1.60116	0.03	0.295	4.63684e-137	-0.265	down
KIAA1217	2.44919e-141	1.22662	0.843	0.804	4.75143e-137	0.039	ns
LAPTM4A	5.088e-141	-1.14497	0.36	0.774	9.87072e-137	-0.414	down
DENND2D	5.51158e-141	-1.27664	0.053	0.355	1.06925e-136	-0.302	down
PLOD3	8.74831e-141	-2.0476	0.012	0.241	1.69717e-136	-0.229	down
ADAMTS1	9.28153e-141	-1.36449	0.049	0.345	1.80062e-136	-0.296	down
IL6ST	1.0445e-140	-1.18766	0.3	0.761	2.02632e-136	-0.461	down
TPRKB	1.05163e-140	-0.998459	0.059	0.372	2.04016e-136	-0.313	ns
RSL24D1	1.09873e-140	-0.946629	0.084	0.43	2.13153e-136	-0.346	ns
TMEM86A	1.16007e-140	-1.00215	0.19	0.624	2.25054e-136	-0.434	down
TMEM183A	1.66852e-140	-1.04358	0.063	0.379	3.23693e-136	-0.316	down
SLC30A1	1.72954e-140	-1.4006	0.042	0.327	3.35531e-136	-0.285	down
RNF167	1.80317e-140	-0.864518	0.117	0.497	3.49815e-136	-0.38	ns
SRP19	1.85394e-140	-0.87832	0.117	0.498	3.59664e-136	-0.381	ns
ERGIC3	1.89117e-140	-0.83576	0.116	0.497	3.66888e-136	-0.381	ns
EXOSC6	2.06546e-140	-1.50836	0.025	0.279	4.00699e-136	-0.254	down
NOP53	2.13048e-140	-0.926355	0.074	0.407	4.13312e-136	-0.333	ns
TMEM243	3.03196e-140	-2.15542	0.012	0.241	5.882e-136	-0.229	down
STIP1	3.12691e-140	-0.993824	0.207	0.649	6.06621e-136	-0.442	ns
TMEM263	3.45143e-140	-2.46954	0.014	0.247	6.69577e-136	-0.233	down
MCL1	3.59398e-140	-1.17595	0.245	0.683	6.97231e-136	-0.438	down
OS9	5.30778e-140	-0.88308	0.096	0.457	1.02971e-135	-0.361	ns
CYP51A1	5.67018e-140	-1.35787	0.158	0.544	1.10001e-135	-0.386	down
NCSTN	5.85484e-140	-0.89684	0.098	0.461	1.13584e-135	-0.363	ns
PRSS12	6.21416e-140	-1.90453	0.056	0.355	1.20555e-135	-0.299	down
PTRHD1	7.36896e-140	-1.93686	0.018	0.257	1.42958e-135	-0.239	down
FES	7.39218e-140	-1.14014	0.059	0.369	1.43408e-135	-0.31	down
BCAT1	8.27582e-140	2.93808	0.588	0.302	1.60551e-135	0.286	up
BLVRB	9.7447e-140	-1.24156	0.046	0.337	1.89047e-135	-0.291	down
CXXC5	1.23604e-139	-0.907732	0.114	0.49	2.39792e-135	-0.376	ns
ARL2	1.29139e-139	-1.49518	0.027	0.284	2.50529e-135	-0.257	down
AIMP1	1.33292e-139	-0.894321	0.156	0.567	2.58586e-135	-0.411	ns
STK16	1.74605e-139	-0.930565	0.049	0.344	3.38733e-135	-0.295	ns
TMEM167A	2.08572e-139	-0.901671	0.181	0.611	4.0463e-135	-0.43	ns
MBOAT7	3.28598e-139	-1.64814	0.028	0.286	6.3748e-135	-0.258	down
YJEFN3	3.86433e-139	-2.03982	0.05	0.339	7.4968e-135	-0.289	down
TLE4	3.99602e-139	1.55424	0.766	0.614	7.75228e-135	0.152	up
ANO6	4.34923e-139	-2.33931	0.025	0.277	8.43751e-135	-0.252	down
SH2D4A	5.7829e-139	1.40897	0.806	0.645	1.12188e-134	0.161	up
NECAP2	6.32783e-139	-0.8907	0.133	0.531	1.2276e-134	-0.398	ns
PPP1R2	7.23524e-139	-0.977331	0.077	0.411	1.40364e-134	-0.334	ns
BEX5	7.3569e-139	-2.82184	0.02	0.261	1.42724e-134	-0.241	down
LPAR1	7.6092e-139	-3.7266	0.009	0.227	1.47619e-134	-0.218	down
MRPL35	8.42836e-139	-1.01346	0.053	0.355	1.6351e-134	-0.302	down
DES	8.54341e-139	-3.30701	0.003	0.209	1.65742e-134	-0.206	down
SAT1	8.60428e-139	-1.1486	0.649	0.958	1.66923e-134	-0.309	down
NPTN	9.76656e-139	-1.04077	0.294	0.754	1.89471e-134	-0.46	down
PIN4	1.00995e-138	-1.012	0.053	0.354	1.9593e-134	-0.301	down
MOB3B	1.09711e-138	1.64008	0.762	0.637	2.1284e-134	0.125	ns
ARF1	1.23719e-138	-1.07921	0.37	0.77	2.40014e-134	-0.4	down
CERS2	1.24745e-138	-1.00546	0.085	0.426	2.42005e-134	-0.341	down
EOGT	1.29452e-138	-1.11763	0.075	0.405	2.51137e-134	-0.33	down
EIF4G1	1.59891e-138	-0.858948	0.155	0.57	3.10188e-134	-0.415	ns
GET3	1.60702e-138	-0.7533	0.109	0.484	3.11762e-134	-0.375	ns
CIB1	1.86233e-138	-0.827148	0.14	0.54	3.61293e-134	-0.4	ns
PSMD9	1.97577e-138	-0.898419	0.056	0.361	3.83299e-134	-0.305	ns
MRPL50	1.98411e-138	-1.10701	0.055	0.357	3.84917e-134	-0.302	down
SLC25A1	2.12273e-138	-1.58417	0.024	0.275	4.11809e-134	-0.251	down
PARVA	2.40806e-138	2.02063	0.713	0.606	4.67163e-134	0.107	ns
MAFF	3.9401e-138	-1.7766	0.04	0.315	7.64379e-134	-0.275	down
ATL2	5.04849e-138	1.46396	0.78	0.763	9.79407e-134	0.017	ns
GTF2F1	5.32212e-138	-1.43151	0.025	0.277	1.03249e-133	-0.252	down
ENSBTAG00000027787	1.06295e-137	-1.25034	0.048	0.339	2.06213e-133	-0.291	down
ACP2	1.1927e-137	-1.56141	0.031	0.293	2.31384e-133	-0.262	down
NR3C1	1.20998e-137	2.72793	0.584	0.283	2.34736e-133	0.301	up
ADIPOR1	1.56129e-137	-0.760392	0.179	0.612	3.0289e-133	-0.433	ns
MSMO1	1.88061e-137	-1.06986	0.214	0.641	3.64839e-133	-0.427	down
MRPS17	2.22458e-137	-0.748398	0.073	0.4	4.31568e-133	-0.327	ns
UTP14A	2.25585e-137	-0.674595	0.129	0.521	4.37634e-133	-0.392	ns
TMBIM4	2.34858e-137	-0.999941	0.414	0.818	4.55624e-133	-0.404	ns
DNAJC4	2.6248e-137	-1.63175	0.022	0.267	5.09211e-133	-0.245	down
ENSBTAG00000025929	2.85685e-137	-1.11318	0.11	0.474	5.54229e-133	-0.364	down
GRTP1	3.01503e-137	-0.799437	0.098	0.457	5.84915e-133	-0.359	ns
PTPN5	3.15655e-137	-2.59327	0.023	0.268	6.12371e-133	-0.245	down
EIF5	3.40782e-137	-1.08964	0.393	0.793	6.61118e-133	-0.4	down
SNRPA1	3.77441e-137	-1.01722	0.15	0.548	7.32236e-133	-0.398	down
CEACAM1	3.8193e-137	-1.43918	0.081	0.405	7.40944e-133	-0.324	down
MRPL37	4.14725e-137	-1.08208	0.045	0.331	8.04567e-133	-0.286	down
GPATCH4	5.89008e-137	-1.33228	0.035	0.303	1.14268e-132	-0.268	down
MYOZ1	6.68699e-137	-2.23403	0.013	0.237	1.29728e-132	-0.224	down
DPAGT1	7.07399e-137	-1.10944	0.044	0.328	1.37235e-132	-0.284	down
LRATD1	7.3159e-137	-2.98818	0.006	0.217	1.41929e-132	-0.211	down
RNFT1	1.28924e-136	-0.851491	0.091	0.439	2.50112e-132	-0.348	ns
LUM	1.31123e-136	-2.80826	0.012	0.236	2.54379e-132	-0.224	down
CASP3	1.35653e-136	-0.984938	0.148	0.549	2.63167e-132	-0.401	ns
FHL3	1.60172e-136	-2.49033	0.008	0.223	3.10733e-132	-0.215	down
STT3B	1.74986e-136	1.61266	0.769	0.783	3.39473e-132	-0.014	ns
MX1	2.67259e-136	-4.54506	0.01	0.226	5.18483e-132	-0.216	down
PPM1H	2.79545e-136	1.66455	0.765	0.661	5.42318e-132	0.104	ns
NSMCE1	3.70622e-136	-0.894416	0.086	0.427	7.19006e-132	-0.341	ns
AP1M2	4.11677e-136	-0.826644	0.148	0.551	7.98652e-132	-0.403	ns
TMEM101	4.17265e-136	-1.34709	0.025	0.276	8.09495e-132	-0.251	down
RAP2B	4.18703e-136	-1.67847	0.03	0.287	8.12284e-132	-0.257	down
NUDT16	4.3374e-136	-2.88495	0.008	0.221	8.41455e-132	-0.213	down
OARD1	4.48394e-136	-0.824246	0.116	0.489	8.69884e-132	-0.373	ns
G6PC3	5.03289e-136	-1.66243	0.022	0.267	9.7638e-132	-0.245	down
GPD2	6.21181e-136	-2.7602	0.022	0.263	1.20509e-131	-0.241	down
WARS1	6.69925e-136	-2.17306	0.03	0.285	1.29965e-131	-0.255	down
SNX9	7.06476e-136	-1.31107	0.287	0.747	1.37056e-131	-0.46	down
ENSBTAG00000038335	7.32885e-136	-1.22675	0.038	0.311	1.4218e-131	-0.273	down
CCDC107	7.65794e-136	-0.857882	0.05	0.343	1.48564e-131	-0.293	ns
PLD3	8.48507e-136	-1.04774	0.198	0.617	1.6461e-131	-0.419	down
EMC8	1.06774e-135	-0.841861	0.082	0.419	2.07141e-131	-0.337	ns
GAB1	1.3038e-135	1.45617	0.782	0.668	2.52937e-131	0.114	ns
PAF1	1.93229e-135	-1.16237	0.078	0.405	3.74864e-131	-0.327	down
COMT	1.93618e-135	-0.640705	0.139	0.541	3.75619e-131	-0.402	ns
UBA1	1.95899e-135	-0.776878	0.135	0.525	3.80044e-131	-0.39	ns
FAM241B	2.04422e-135	-0.832787	0.061	0.37	3.9658e-131	-0.309	ns
GALNT1	2.96727e-135	-1.11934	0.269	0.724	5.7565e-131	-0.455	down
TMEM205	3.04433e-135	-1.72839	0.019	0.254	5.906e-131	-0.235	down
P4HA2	3.23035e-135	-1.53479	0.05	0.336	6.26687e-131	-0.286	down
ENSBTAG00000027075	3.73673e-135	-2.60494	0.009	0.225	7.24926e-131	-0.216	down
BORCS8	3.79315e-135	-1.03049	0.062	0.371	7.35871e-131	-0.309	down
DNAJA2	3.90574e-135	-0.797917	0.166	0.585	7.57714e-131	-0.419	ns
SMIM19	4.38281e-135	-0.859842	0.088	0.429	8.50265e-131	-0.341	ns
RAB7A	4.3989e-135	-1.17985	0.221	0.653	8.53386e-131	-0.432	down
RELL1	5.13582e-135	2.1143	0.698	0.573	9.9635e-131	0.125	ns
PLSCR3	5.44439e-135	-2.28751	0.02	0.257	1.05621e-130	-0.237	down
ARHGAP10	7.57861e-135	1.73842	0.733	0.599	1.47025e-130	0.134	ns
DBNL	1.31604e-134	-0.914046	0.25	0.698	2.55313e-130	-0.448	ns
TRIAP1	1.73345e-134	-1.45039	0.024	0.269	3.3629e-130	-0.245	down
SNAP29	2.56023e-134	-1.84145	0.016	0.246	4.96685e-130	-0.23	down
C18H19orf48	3.23882e-134	-1.22279	0.038	0.307	6.28331e-130	-0.269	down
RARRES1	3.52216e-134	-2.28126	0.012	0.232	6.833e-130	-0.22	down
GLUD1	3.87854e-134	-0.820257	0.096	0.445	7.52436e-130	-0.349	ns
RBX1	4.16714e-134	-1.04184	0.265	0.68	8.08425e-130	-0.415	down
LSM6	5.20028e-134	-0.847415	0.153	0.554	1.00885e-129	-0.401	ns
TRNT1	8.58684e-134	-1.09356	0.061	0.364	1.66585e-129	-0.303	down
COX20	8.6461e-134	-1.41466	0.03	0.286	1.67734e-129	-0.256	down
PKP3	9.25866e-134	-1.18426	0.041	0.316	1.79618e-129	-0.275	down
ABTB2	1.0853e-133	1.31959	0.743	0.445	2.10548e-129	0.298	up
GPX1	1.22249e-133	-1.19999	0.065	0.371	2.37163e-129	-0.306	down
TPM3	1.48557e-133	-1.00436	0.36	0.786	2.882e-129	-0.426	down
HES1	1.49598e-133	-0.992632	0.082	0.41	2.90221e-129	-0.328	ns
UBE2G2	1.63556e-133	-0.925161	0.114	0.475	3.173e-129	-0.361	ns
PRSS22	1.874e-133	-2.07905	0.011	0.228	3.63556e-129	-0.217	down
GPX4	1.97559e-133	-1.12354	0.426	0.774	3.83264e-129	-0.348	down
NFU1	2.34918e-133	-0.977143	0.171	0.577	4.55741e-129	-0.406	ns
TRABD	2.72157e-133	-1.1055	0.045	0.325	5.27984e-129	-0.28	down
ARFRP1	2.84314e-133	-0.710461	0.064	0.373	5.51569e-129	-0.309	ns
CORO2A	3.27022e-133	-1.01266	0.094	0.437	6.34422e-129	-0.343	down
PRKAG2	3.36526e-133	-1.99628	0.052	0.337	6.52861e-129	-0.285	down
MRPL38	3.58076e-133	-0.922697	0.067	0.379	6.94667e-129	-0.312	ns
SSR3	4.83343e-133	-1.20386	0.374	0.727	9.37685e-129	-0.353	down
MBNL1	5.12362e-133	1.71173	0.725	0.539	9.93981e-129	0.186	up
ZFAND3	5.23395e-133	0.85273	0.919	0.947	1.01539e-128	-0.028	ns
SSB	5.28717e-133	-0.993094	0.198	0.612	1.02571e-128	-0.414	ns
SOD2	5.66851e-133	-1.18032	0.038	0.305	1.09969e-128	-0.267	down
EIF3CL	6.10196e-133	-0.892627	0.179	0.588	1.18378e-128	-0.409	ns
VCP	6.83267e-133	-1.07931	0.366	0.753	1.32554e-128	-0.387	down
IER3IP1	9.91826e-133	-0.812606	0.105	0.462	1.92414e-128	-0.357	ns
AFAP1	1.03157e-132	-1.4964	0.156	0.539	2.00125e-128	-0.383	down
SF3B4	1.15447e-132	-0.980776	0.052	0.343	2.23967e-128	-0.291	ns
BCCIP	1.5161e-132	-1.0111	0.06	0.36	2.94123e-128	-0.3	down
AEBP2	2.45729e-132	1.90853	0.71	0.568	4.76715e-128	0.142	ns
SUMF2	2.86085e-132	-1.43065	0.02	0.254	5.55004e-128	-0.234	down
SLC4A4	2.86113e-132	-4.3287	0.013	0.231	5.55059e-128	-0.218	down
STARD13	2.91467e-132	2.77021	0.551	0.237	5.65447e-128	0.314	up
HSPA8	2.95346e-132	-0.768405	0.845	0.947	5.72972e-128	-0.102	ns
YPEL5	3.1831e-132	-1.21024	0.058	0.353	6.17522e-128	-0.295	down
P3H3	3.2863e-132	-2.4848	0.008	0.216	6.37543e-128	-0.208	down
SSRP1	3.61656e-132	-0.901022	0.151	0.543	7.01612e-128	-0.392	ns
ARSB	3.66388e-132	-1.81997	0.028	0.277	7.10792e-128	-0.249	down
ANAPC11	5.54134e-132	-0.766969	0.082	0.413	1.07502e-127	-0.331	ns
TMEM132A	7.39442e-132	-0.988589	0.074	0.392	1.43452e-127	-0.318	ns
RETREG2	7.58347e-132	-0.762975	0.092	0.435	1.47119e-127	-0.343	ns
SPRING1	9.73517e-132	-0.778234	0.092	0.434	1.88862e-127	-0.342	ns
FOXN3	1.36464e-131	1.03875	0.876	0.901	2.64741e-127	-0.025	ns
MOGS	1.59173e-131	-1.09305	0.038	0.305	3.08795e-127	-0.267	down
TSTD3	1.68029e-131	-2.07461	0.01	0.223	3.25976e-127	-0.213	down
DHRS4	2.35148e-131	-1.32242	0.033	0.291	4.56187e-127	-0.258	down
JADE3	2.60364e-131	1.85697	0.726	0.643	5.05105e-127	0.083	ns
ENSBTAG00000046614	2.78841e-131	-4.51586	0.001	0.189	5.40952e-127	-0.188	down
MAP2K5	2.83442e-131	1.70344	0.752	0.673	5.49877e-127	0.079	ns
CALM2	2.84706e-131	-1.24187	0.51	0.785	5.52329e-127	-0.275	down
THAP7	2.94489e-131	-0.719272	0.068	0.379	5.71308e-127	-0.311	ns
PAPSS2	3.16989e-131	2.72091	0.514	0.172	6.14959e-127	0.342	up
ZFAND2A	4.13495e-131	-1.70938	0.082	0.397	8.0218e-127	-0.315	down
MED29	5.73265e-131	-0.81728	0.065	0.37	1.11213e-126	-0.305	ns
CANT1	6.15002e-131	-0.830149	0.051	0.337	1.1931e-126	-0.286	ns
SLC25A20	6.70495e-131	-0.879744	0.07	0.382	1.30076e-126	-0.312	ns
SLC66A3	9.10914e-131	-1.31645	0.036	0.297	1.76717e-126	-0.261	down
RUVBL1	1.02928e-130	-0.940177	0.104	0.453	1.9968e-126	-0.349	ns
NFKBIA	1.05286e-130	-2.94124	0.024	0.259	2.04256e-126	-0.235	down
BET1L	1.07867e-130	-0.989886	0.053	0.341	2.09263e-126	-0.288	ns
GLRX3	1.12182e-130	-0.748689	0.191	0.621	2.17633e-126	-0.43	ns
ZC3H15	1.15919e-130	-0.909869	0.228	0.659	2.24883e-126	-0.431	ns
SNRPF	1.28819e-130	-0.832086	0.117	0.48	2.49909e-126	-0.363	ns
EGLN3	1.33878e-130	-3.01531	0.017	0.24	2.59723e-126	-0.223	down
MLEC	1.4982e-130	-1.06187	0.056	0.349	2.9065e-126	-0.293	down
PAPOLA	1.51372e-130	1.18015	0.824	0.833	2.93661e-126	-0.009	ns
NGRN	1.81029e-130	-1.01785	0.044	0.319	3.51196e-126	-0.275	down
SMRP1	1.81634e-130	-1.98334	0.018	0.247	3.5237e-126	-0.229	down
TUBG1	2.2214e-130	-1.03547	0.044	0.317	4.30951e-126	-0.273	down
SLX9	2.30627e-130	-1.23543	0.036	0.296	4.47416e-126	-0.26	down
ENSBTAG00000049377	2.32382e-130	-2.13551	0.012	0.228	4.50821e-126	-0.216	down
LRRC8A	2.51391e-130	-0.979761	0.075	0.393	4.87699e-126	-0.318	ns
LPGAT1	3.78942e-130	-1.69536	0.04	0.305	7.35148e-126	-0.265	down
TSR2	4.2935e-130	-1.87703	0.017	0.241	8.3294e-126	-0.224	down
GFOD1	4.53664e-130	4.62383	0.379	0.047	8.80109e-126	0.332	up
MAK16	4.68347e-130	-1.09014	0.044	0.317	9.08592e-126	-0.273	down
MGST2	4.83894e-130	-0.738632	0.128	0.506	9.38755e-126	-0.378	ns
CDO1	5.02636e-130	-1.57853	0.034	0.289	9.75114e-126	-0.255	down
NOSIP	5.92095e-130	-0.785312	0.122	0.495	1.14866e-125	-0.373	ns
NOL12	7.74802e-130	-1.19755	0.041	0.309	1.50312e-125	-0.268	down
ENTPD2	8.10353e-130	-1.58976	0.016	0.238	1.57208e-125	-0.222	down
MYO10	8.86707e-130	1.63812	0.747	0.594	1.72021e-125	0.153	up
RIPOR2	1.18936e-129	-3.84546	0.003	0.194	2.30736e-125	-0.191	down
GIPC1	1.2266e-129	-1.21909	0.027	0.271	2.3796e-125	-0.244	down
LYPLA2	1.69374e-129	-1.01138	0.029	0.277	3.28586e-125	-0.248	down
PHOSPHO2	1.89344e-129	-1.55215	0.022	0.256	3.67328e-125	-0.234	down
ARMT1	1.99625e-129	-0.941677	0.091	0.427	3.87273e-125	-0.336	ns
LMF2	2.51788e-129	-0.845775	0.071	0.383	4.88468e-125	-0.312	ns
SULT1A1	2.92637e-129	-1.37463	0.035	0.293	5.67717e-125	-0.258	down
A2M	3.291e-129	-2.49335	0.03	0.275	6.38454e-125	-0.245	down
LGALSL	7.1931e-129	-1.18615	0.055	0.341	1.39546e-124	-0.286	down
GPS1	7.41193e-129	-1.20136	0.051	0.332	1.43791e-124	-0.281	down
MAFG	8.70674e-129	-1.13388	0.099	0.435	1.68911e-124	-0.336	down
NDUFAF3	9.71221e-129	-0.706463	0.141	0.531	1.88417e-124	-0.39	ns
PPT2	1.01922e-128	-0.867682	0.063	0.362	1.97728e-124	-0.299	ns
PSMA6	1.06594e-128	-0.946089	0.236	0.655	2.06792e-124	-0.419	ns
EFCAB14	1.15867e-128	-0.789771	0.165	0.571	2.24783e-124	-0.406	ns
CCNYL1	1.32916e-128	-1.99725	0.055	0.333	2.57857e-124	-0.278	down
H2AZ2	1.58905e-128	-1.18767	0.274	0.666	3.08276e-124	-0.392	down
RRS1	1.65591e-128	-1.75906	0.02	0.247	3.21246e-124	-0.227	down
OGFR	2.03669e-128	-1.44308	0.025	0.265	3.95117e-124	-0.24	down
TMEM11	2.27624e-128	-0.659287	0.121	0.494	4.41591e-124	-0.373	ns
PLA2G4A	3.47848e-128	-2.62965	0.011	0.221	6.74826e-124	-0.21	down
PET100	4.22071e-128	-1.33355	0.045	0.316	8.18818e-124	-0.271	down
MYL9	4.72737e-128	-1.13573	0.089	0.415	9.1711e-124	-0.326	down
PLBD2	4.97258e-128	-1.11264	0.055	0.34	9.64681e-124	-0.285	down
NTMT1	6.07399e-128	-0.883332	0.048	0.325	1.17835e-123	-0.277	ns
TACC1	6.20628e-128	1.97718	0.664	0.412	1.20402e-123	0.252	up
ATG12	6.87184e-128	-0.742003	0.177	0.591	1.33314e-123	-0.414	ns
U2AF1	7.66039e-128	-0.792697	0.19	0.605	1.48612e-123	-0.415	ns
ALG2	8.79049e-128	-1.10121	0.031	0.28	1.70536e-123	-0.249	down
PPID	9.32362e-128	-0.730174	0.116	0.479	1.80878e-123	-0.363	ns
GPR108	1.01993e-127	-0.96783	0.067	0.369	1.97866e-123	-0.302	ns
COQ2	1.1189e-127	-0.969989	0.104	0.447	2.17067e-123	-0.343	ns
SLC35A4	1.52369e-127	-1.31509	0.024	0.259	2.95596e-123	-0.235	down
TMEM120A	2.06713e-127	-0.591568	0.073	0.387	4.01023e-123	-0.314	ns
CHMP6	2.24711e-127	-1.70204	0.024	0.259	4.35939e-123	-0.235	down
NEK1	2.66516e-127	1.75252	0.725	0.564	5.17041e-123	0.161	up
ANKRD13A	3.33032e-127	-0.727108	0.147	0.538	6.46082e-123	-0.391	ns
MLLT10	3.75833e-127	1.04654	0.848	0.866	7.29117e-123	-0.018	ns
SYS1	4.01396e-127	-1.04939	0.043	0.309	7.78708e-123	-0.266	down
EIF3J	4.45849e-127	-1.0139	0.131	0.496	8.64947e-123	-0.365	down
AGPAT1	7.25271e-127	-0.986555	0.049	0.325	1.40703e-122	-0.276	ns
PAICS	7.7649e-127	-0.690706	0.141	0.525	1.50639e-122	-0.384	ns
PPP2R1A	8.09082e-127	-0.6988	0.161	0.563	1.56962e-122	-0.402	ns
STK25	1.1291e-126	-0.661556	0.124	0.495	2.19046e-122	-0.371	ns
NPC2	1.59398e-126	-1.81643	0.652	0.848	3.09232e-122	-0.196	down
NPRL2	1.7632e-126	-0.638294	0.121	0.487	3.4206e-122	-0.366	ns
MVB12A	2.13387e-126	-0.687847	0.088	0.417	4.13971e-122	-0.329	ns
STT3A	2.35739e-126	-0.756903	0.176	0.586	4.57334e-122	-0.41	ns
PSME3	2.77994e-126	-0.739894	0.061	0.355	5.39308e-122	-0.294	ns
IL17RA	3.9929e-126	-0.647705	0.078	0.395	7.74622e-122	-0.317	ns
GSK3A	4.24251e-126	-0.75677	0.069	0.375	8.23047e-122	-0.306	ns
DRAP1	5.74805e-126	-0.908634	0.047	0.32	1.11512e-121	-0.273	ns
USP18	6.54898e-126	-3.7055	0.007	0.205	1.2705e-121	-0.198	down
GPAA1	7.18476e-126	-0.700399	0.128	0.501	1.39384e-121	-0.373	ns
MTSS1	7.88208e-126	-3.15338	0.036	0.283	1.52912e-121	-0.247	down
SRGN	8.00426e-126	-1.2968	0.137	0.499	1.55283e-121	-0.362	down
MRPL45	9.44069e-126	-0.805556	0.084	0.407	1.83149e-121	-0.323	ns
GNA14	1.38856e-125	1.59729	0.736	0.529	2.6938e-121	0.207	up
H2BC15	1.4528e-125	-1.70894	0.026	0.261	2.81844e-121	-0.235	down
FDX2	1.4856e-125	-0.861102	0.034	0.285	2.88206e-121	-0.251	ns
CCT8	1.53717e-125	-0.930062	0.281	0.706	2.98211e-121	-0.425	ns
RASSF4	2.09588e-125	-2.65362	0.007	0.205	4.066e-121	-0.198	down
NME3	2.13436e-125	-1.61239	0.028	0.266	4.14066e-121	-0.238	down
HSPA1A	2.46012e-125	-1.04006	0.42	0.807	4.77264e-121	-0.387	down
TOB2	2.71638e-125	-1.1771	0.07	0.371	5.26978e-121	-0.301	down
PJA1	3.70334e-125	-1.52903	0.017	0.235	7.18449e-121	-0.218	down
GGH	4.2741e-125	-1.2494	0.167	0.537	8.29176e-121	-0.37	down
STXBP2	4.41651e-125	-0.723707	0.088	0.415	8.56803e-121	-0.327	ns
ENSBTAG00000022204	5.161e-125	-1.09696	0.062	0.354	1.00123e-120	-0.292	down
UNC50	5.56007e-125	-0.789169	0.09	0.419	1.07865e-120	-0.329	ns
SSNA1	6.22656e-125	-0.568876	0.117	0.476	1.20795e-120	-0.359	ns
UBFD1	7.31569e-125	-0.49593	0.13	0.506	1.41924e-120	-0.376	ns
BAK1	1.14128e-124	-1.61484	0.019	0.241	2.21409e-120	-0.222	down
HSCB	1.24633e-124	-1.56293	0.011	0.217	2.41787e-120	-0.206	down
ZNF638	1.42939e-124	1.29228	0.793	0.818	2.77302e-120	-0.025	ns
WDR83	1.44183e-124	-0.924069	0.054	0.334	2.79715e-120	-0.28	ns
JMJD6	1.50667e-124	-1.08173	0.048	0.319	2.92293e-120	-0.271	down
PRPF19	1.61083e-124	-0.724467	0.068	0.371	3.12502e-120	-0.303	ns
SRA1	1.78971e-124	-0.753319	0.085	0.407	3.47204e-120	-0.322	ns
DHCR7	2.27723e-124	-0.986562	0.073	0.379	4.41782e-120	-0.306	ns
ARHGAP1	2.65945e-124	-0.729769	0.128	0.499	5.15933e-120	-0.371	ns
FXN	3.20283e-124	-0.937634	0.107	0.45	6.21349e-120	-0.343	ns
TRMT61A	3.71753e-124	-1.87482	0.019	0.239	7.21201e-120	-0.22	down
CIAPIN1	3.74201e-124	-0.843292	0.065	0.362	7.2595e-120	-0.297	ns
CCDC47	3.74428e-124	-0.703545	0.126	0.494	7.26391e-120	-0.368	ns
ZMAT1	4.67834e-124	3.58022	0.435	0.109	9.07598e-120	0.326	up
TSPAN17	5.31178e-124	-1.37752	0.023	0.253	1.03049e-119	-0.23	down
TGM2	5.53408e-124	-2.37043	0.072	0.357	1.07361e-119	-0.285	down
SGTA	5.58529e-124	-0.725473	0.061	0.351	1.08355e-119	-0.29	ns
ACO2	6.77251e-124	-0.774081	0.215	0.639	1.31387e-119	-0.424	ns
NRM	1.02344e-123	-0.922977	0.049	0.321	1.98548e-119	-0.272	ns
SLC5A5	1.55938e-123	-2.23773	0.018	0.234	3.0252e-119	-0.216	down
EGLN2	1.95324e-123	-0.748929	0.077	0.387	3.78929e-119	-0.31	ns
AFG3L2	2.74006e-123	-0.6523	0.152	0.543	5.31573e-119	-0.391	ns
MVD	3.17338e-123	-1.01707	0.048	0.319	6.15637e-119	-0.271	down
NECTIN2	3.22802e-123	-0.950729	0.342	0.79	6.26236e-119	-0.448	ns
OCEL1	3.47374e-123	-1.04946	0.036	0.287	6.73906e-119	-0.251	down
CD82	3.53026e-123	-3.80375	0.002	0.181	6.84871e-119	-0.179	down
ACADVL	3.70696e-123	-0.550629	0.098	0.435	7.1915e-119	-0.337	ns
COMMD9	3.88438e-123	-0.892859	0.037	0.289	7.53569e-119	-0.252	ns
ATXN7L3B	4.30851e-123	-0.720205	0.184	0.591	8.35851e-119	-0.407	ns
USP15	4.98873e-123	1.04076	0.855	0.894	9.67813e-119	-0.039	ns
FST	5.47052e-123	-3.8112	0.006	0.197	1.06128e-118	-0.191	down
MRPS11	5.51367e-123	-1.21241	0.046	0.312	1.06965e-118	-0.266	down
KLF4	5.8756e-123	-2.77084	0.007	0.201	1.13987e-118	-0.194	down
SRPRB	6.01955e-123	-0.587423	0.109	0.457	1.16779e-118	-0.348	ns
SNRNP27	6.46177e-123	-0.635634	0.122	0.485	1.25358e-118	-0.363	ns
PQBP1	6.66577e-123	-1.60561	0.016	0.229	1.29316e-118	-0.213	down
ENSBTAG00000012150	7.70895e-123	-1.84163	0.017	0.231	1.49554e-118	-0.214	down
GNL1	9.75069e-123	-1.20249	0.041	0.3	1.89163e-118	-0.259	down
ESD	9.77395e-123	-0.676176	0.14	0.518	1.89615e-118	-0.378	ns
RSRC1	1.06903e-122	1.50338	0.768	0.766	2.07391e-118	0.002	ns
ESYT1	1.2765e-122	-0.865101	0.079	0.389	2.47642e-118	-0.31	ns
SUOX	1.38386e-122	-1.38789	0.022	0.248	2.68469e-118	-0.226	down
MYO1B	1.41325e-122	1.31366	0.816	0.83	2.74171e-118	-0.014	ns
NET1	1.41549e-122	-0.791846	0.287	0.733	2.74605e-118	-0.446	ns
TMEM230	1.58365e-122	-0.932148	0.038	0.291	3.07229e-118	-0.253	ns
NUPR2	1.6518e-122	-2.01583	0.008	0.202	3.20449e-118	-0.194	down
GPRC5C	1.68821e-122	-3.02792	0.006	0.196	3.27512e-118	-0.19	down
[truncated: 17,401 more rows]

## Sheet: TF_Gene_top30
TF	target	importance
OTX2	MTUS2	4.13447
OTX2	SYBU	4.04771
OTX2	ENSBTAG00000049343	3.16301
OTX2	RAB1B	3.05679
OTX2	ENSBTAG00000030274	2.79805
OTX2	LRWD1	2.62073
OTX2	ENSBTAG00000050438	2.49767
OTX2	TTPAL	2.07865
OTX2	MMP24	1.67323
OTX2	WDR36	1.59415
OTX2	FBXL19	1.57205
OTX2	DDX41	1.53062
OTX2	HIC2	1.51601
OTX2	GLYCTK	1.47269
OTX2	HSD17B1	1.47039
OTX2	MBD4	1.42449
OTX2	GMPR	1.32716
OTX2	ABCG5	1.29836
OTX2	TMEM253	1.27623
OTX2	HSF2	1.2563
OTX2	MAP4K1	1.23805
OTX2	AMN	1.23614
OTX2	ECEL1	1.23083
OTX2	ENSBTAG00000049436	1.21343
OTX2	ENSBTAG00000035643	1.20317
OTX2	JCAD	1.19279
OTX2	TUBGCP6	1.18048
OTX2	ENSBTAG00000009783	1.10425
OTX2	SYNPO	1.09374
OTX2	PADI2	1.02632
MYBL2	SLC7A4	47.4406
MYBL2	FURIN	42.7318
MYBL2	YJEFN3	38.3929
MYBL2	TCAF2	36.3232
MYBL2	CAPG	35.936
MYBL2	SLC16A9	34.7519
MYBL2	ENSBTAG00000053048	33.8716
MYBL2	SLC34A2	33.4528
MYBL2	RPS27	32.3016
MYBL2	SEC61A1	32.0905
MYBL2	ATP5ME	31.9861
MYBL2	CALML5	31.9715
MYBL2	DNASE1L3	31.793
MYBL2	TUBB4B	31.1332
MYBL2	RPS28	30.4614
MYBL2	COX3	29.8455
MYBL2	FBLN2	29.6875
MYBL2	CLDN6	29.687
MYBL2	RPL36	29.2423
MYBL2	RPL23	28.847
MYBL2	NHERF1	28.581
MYBL2	PLK1	28.5688
MYBL2	RPL37	28.2017
MYBL2	SFN	28.1698
MYBL2	KIF22	27.9548
MYBL2	KRT18	26.8395
MYBL2	NT5DC2	26.7113
MYBL2	RPL18	26.6639
MYBL2	DNMT3A	26.3227
MYBL2	PLIN3	25.9013
HMGA1	RPS27	133.092
HMGA1	RPL28	108.095
HMGA1	RPS12	105.772
HMGA1	COX6B1	101.722
HMGA1	ENO1	101.316
HMGA1	RPS5	100.16
HMGA1	PFN1	96.7975
HMGA1	RPL8	95.3603
HMGA1	AP2S1	95.0778
HMGA1	RPL7A	93.825
HMGA1	BASP1	92.8867
HMGA1	RPS29	89.2113
HMGA1	YJEFN3	87.6303
HMGA1	RPS28	86.7246
HMGA1	RPL36	86.639
HMGA1	ENSBTAG00000039728	86.3619
HMGA1	PRDX2	86.0826
HMGA1	RPL15	85.2273
HMGA1	RPL23	83.7362
HMGA1	RPL38	83.0069
HMGA1	UQCR10	81.845
HMGA1	RPS15A	81.765
HMGA1	RPLP1	80.528
HMGA1	RPL32	78.2232
HMGA1	RPL37	76.8286
HMGA1	EEF1D	76.7822
HMGA1	GPD1L	76.2587
HMGA1	RPL37A	75.9162
HMGA1	ENSBTAG00000005315	75.8655
HMGA1	ANXA6	75.7118
SOX15	KRT8	20.6713
SOX15	PLAC8A	15.8346
SOX15	ENO1	14.9926
SOX15	TAGLN2	14.9389
SOX15	KRT19	14.069
SOX15	LDHA	12.9523
SOX15	RPS15A	12.8536
SOX15	CSRP2	12.6783
SOX15	GPRC5C	12.5243
SOX15	GPX1	12.3541
SOX15	CRIP1	11.9907
SOX15	ENSBTAG00000037775	11.8697
SOX15	DYNLL1	11.8034
SOX15	GAPDH	11.6176
SOX15	HPDL	11.5574
SOX15	CLIC1	11.4546
SOX15	RPS27L	11.3432
SOX15	TMEM53	11.141
SOX15	FTH1	11.035
SOX15	ENSBTAG00000050943	10.6665
SOX15	ACTG1	10.4702
SOX15	KRT18	10.2545
SOX15	FHL3	10.146
SOX15	FOLR1	10.1277
SOX15	VDAC2	9.90678
SOX15	RAB11A	9.83639
SOX15	ENSBTAG00000039130	9.78204
SOX15	CA10	9.71996
SOX15	NHERF1	9.5279
SOX15	RPL15	9.41887
CDX2	DNMT3A	52.753
CDX2	NMT1	47.0044
CDX2	NCL	45.3142
CDX2	RIN3	42.8406
CDX2	PSMC1	40.4107
CDX2	ENSBTAG00000003086	36.4154
CDX2	ATP6V0A4	35.7448
CDX2	ATP8	35.3953
CDX2	ENSBTAG00000036102	34.6562
CDX2	DPPA2	34.3691
CDX2	RIMKLB	34.1192
CDX2	MTHFD2	33.0078
CDX2	WDR43	32.1538
CDX2	ENSBTAG00000022278	32.1335
CDX2	DDX54	31.5244
CDX2	EIF2B4	31.1795
CDX2	ABCF1	31.0406
CDX2	NUP214	30.9295
CDX2	ENSBTAG00000027525	30.7874
CDX2	MFAP5	30.7352
CDX2	LPIN2	30.3332
CDX2	ATN1	29.7566
CDX2	ASCL2	28.991
CDX2	DKC1	28.6856
CDX2	DCBLD1	28.0204
CDX2	ESRRB	27.2968
CDX2	HNRNPM	26.6268
CDX2	AICDA	26.1854
CDX2	AP2S1	26.0502
CDX2	PTDSS2	25.9585
USF2	ENSBTAG00000050791	10.5383
USF2	CACFD1	7.36058
USF2	NUDT16L1	6.18203
USF2	ATP6V0E2	5.29979
USF2	C10H15orf62	5.06188
USF2	PCDH7	5.0155
USF2	N4BP3	5.00443
USF2	TMEM9	4.96397
USF2	PRTG	4.73891
USF2	CEP104	4.73368
USF2	RPLP1	4.68397
USF2	ZNF165	4.60101
USF2	FLT1	4.58419
USF2	C18H19orf12	4.58234
USF2	CSN3	4.55303
USF2	NRBP2	4.19724
USF2	FBLN2	4.14589
USF2	CAPNS1	3.99174
USF2	ENSBTAG00000053606	3.90281
USF2	PIGQ	3.83366
USF2	BRF1	3.80264
USF2	B3GALNT2	3.80253
USF2	ENSBTAG00000025146	3.77138
USF2	ZNF692	3.72732
USF2	DPM2	3.72687
USF2	UAP1L1	3.69641
USF2	SLC43A2	3.48634
USF2	CPTP	3.42355
USF2	MAGIX	3.39723
USF2	ACO1	3.31446
MXD3	GAS2L3	12.1355
MXD3	ECT2	11.2011
MXD3	FAM72A	10.9978
MXD3	CDKN2C	9.41545
MXD3	UBE2C	8.87145
MXD3	MKI67	8.79955
MXD3	PCLAF	8.60221
MXD3	SYCE2	8.36764
MXD3	RNASE6	7.71291
MXD3	ENSBTAG00000038326	6.53295
MXD3	LUM	6.49569
MXD3	NCAPG	6.41961
MXD3	RNF214	6.25201
MXD3	NUSAP1	5.83075
MXD3	CNIH2	5.79857
MXD3	MTFR2	5.66503
MXD3	MS4A1	5.26152
MXD3	ALG10	5.01049
MXD3	MIS18BP1	4.69116
MXD3	KLK1	4.5756
MXD3	HAUS3	4.45774
MXD3	HASPIN	4.28856
MXD3	TCTN1	4.15745
MXD3	CDCA2	4.09103
MXD3	CA2	3.86979
MXD3	GTSE1	3.8239
MXD3	CKS2	3.82198
MXD3	CKAP2L	3.57739
MXD3	ENSBTAG00000020100	3.47049
MXD3	PFKFB3	3.31242
KLF5	PDPN	22.1103
KLF5	ENSBTAG00000024482	21.4127
KLF5	EPB41L2	20.0287
KLF5	NEDD4	19.5138
KLF5	DUSP14	19.3923
KLF5	MYOF	19.346
KLF5	PTPN14	19.0196
KLF5	SEPTIN11	18.0166
KLF5	TES	17.8917
KLF5	FBLN2	17.2637
KLF5	CTNNAL1	16.696
KLF5	GNPTAB	15.3645
KLF5	ND3	14.7041
KLF5	FAM118A	14.5942
KLF5	ND2	14.4888
KLF5	FRMD6	14.1374
KLF5	FLT1	14.1121
KLF5	ANO6	14.012
KLF5	RABGAP1L	13.9735
KLF5	SLC1A1	13.8843
KLF5	ND4L	13.7347
KLF5	TBC1D9	13.6401
KLF5	ATP1A1	13.4498
KLF5	ASAP2	13.3785
KLF5	FHL2	12.3406
KLF5	RBPMS	11.9355
KLF5	KIFC3	11.6101
KLF5	DCBLD1	11.1417
KLF5	SRPK2	10.9396
KLF5	CMIP	10.8517
USF1	HGFAC	11.0613
USF1	SMIM29	10.1508
USF1	MTARC1	7.98169
USF1	DSEL	7.98114
USF1	SOHLH2	7.61421
USF1	ICE2	6.83082
USF1	MSRB2	6.45432
USF1	SFR1	5.75674
USF1	TMEM17	5.52045
USF1	ENSBTAG00000050919	5.37323
USF1	ENSBTAG00000025398	5.13713
USF1	TRAPPC6A	5.02622
USF1	ENSBTAG00000049114	4.55912
USF1	CNP	4.48012
USF1	CSTA	4.35852
USF1	PNPLA4	4.32558
USF1	TMUB2	4.27382
USF1	MTCP1	4.11127
USF1	SPRY2	4.06899
USF1	SERPING1	3.73947
USF1	MYL9	3.69451
USF1	DNAI4	3.63498
USF1	ZNF568	3.59719
USF1	CXCL16	3.51227
USF1	ZNF789	3.4609
USF1	TMEM134	3.38565
USF1	ENSBTAG00000048730	3.35288
USF1	THNSL1	3.34594
USF1	FBLN7	3.29428
USF1	ENSBTAG00000001143	3.28022
SP6	STAC3	8.37128
SP6	CXCL5	5.16072
SP6	ENSBTAG00000051757	4.08808
SP6	CA8	4.03421
SP6	HDAC11	3.35505
SP6	NAALAD2	3.20217
SP6	PTCH2	3.06389
SP6	IFNT2	2.51692
SP6	DNM3	2.44916
SP6	HAVCR2	2.38376
SP6	ENSBTAG00000048971	2.29211
SP6	PGAM2	2.17695
SP6	TMEM218	2.09824
SP6	SC5D	2.03421
SP6	LSS	2.01423
SP6	TMEM138	1.93851
SP6	CEACAM1	1.92654
SP6	ENSBTAG00000052394	1.76853
SP6	PLA2G4A	1.72066
SP6	PTK7	1.68031
SP6	SH3BP5L	1.61278
SP6	SYNDIG1L	1.59623
SP6	FHIT	1.55301
SP6	SYNGR2	1.51416
SP6	CRYBA1	1.50257
SP6	TRIM35	1.49891
SP6	ENSBTAG00000038652	1.49839
SP6	ZNF142	1.48792
SP6	ZNF79	1.48508
SP6	ENSBTAG00000051451	1.4204
HAND1	ENSBTAG00000053057	187.385
HAND1	TMSB4	151.858
HAND1	TKDP4	151.129
HAND1	FABP5	147.629
HAND1	TKDP1	147.169
HAND1	TMSB10	128.532
HAND1	SSLP1	112.897
HAND1	HSPB1	106.08
HAND1	DSTN	104.544
HAND1	ENSBTAG00000050611	104.029
HAND1	ASS1	100.353
HAND1	H2AJ	96.334
HAND1	TMBIM6	96.2577
HAND1	CD24	94.8536
HAND1	GALM	94.4461
HAND1	TPM4	91.9122
HAND1	ARHGDIB	89.2372
HAND1	PTTG1IP	84.8419
HAND1	C15H11orf96	84.5488
HAND1	IFNT	83.9151
HAND1	ADGRE5	81.7486
HAND1	IFNT3	81.5151
HAND1	BCAM	81.1386
HAND1	ENSBTAG00000052465	80.551
HAND1	SPNS1	79.1496
HAND1	PFN1	78.8575
HAND1	DOK4	78.0232
HAND1	FADS1	77.2635
HAND1	KRT7	76.6124
HAND1	REXO2	76.2952
MAZ	AHSG	54.3826
MAZ	CEBPE	6.20139
MAZ	NPHS2	4.92713
MAZ	ENSBTAG00000032899	4.36512
MAZ	GABRB2	4.3382
MAZ	KIF26B	3.90809
MAZ	IGFL1	3.77554
MAZ	ENSBTAG00000049036	3.12295
MAZ	CFI	2.93305
MAZ	BEX3	2.84189
MAZ	TSPAN18	2.81901
MAZ	HIF3A	2.40935
MAZ	TTR	2.36452
MAZ	APOA2	2.31327
MAZ	ADAMTS9	2.23978
MAZ	PECAM1	2.20746
MAZ	ORM1	2.19412
MAZ	DNASE1L2	2.12582
MAZ	ENSBTAG00000046178	2.08169
MAZ	PRR19	2.05326
MAZ	KPNA5	2.05009
MAZ	SERPINE3	2.04552
MAZ	IFNT2	2.01642
MAZ	HCN1	2.00959
MAZ	PNMT	1.91698
MAZ	ENSBTAG00000015811	1.74543
MAZ	SYTL5	1.7091
MAZ	NAALAD2	1.68313
MAZ	DMGDH	1.68057
MAZ	ENSBTAG00000052602	1.67944
GATA6	MTUS2	48.0492
GATA6	PRSS12	27.9659
GATA6	TH	25.7692
GATA6	KLB	24.8651
GATA6	TMEM47	19.6478
GATA6	ENSBTAG00000050846	18.859
GATA6	CDH2	17.3688
GATA6	EHBP1	17.3305
GATA6	APOA2	17.0151
GATA6	SKAP1	17.0059
GATA6	TOPAZ1	16.6436
GATA6	PXDN	16.1455
GATA6	GPX3	15.9354
GATA6	TSPAN2	15.4984
GATA6	JAM2	15.4846
GATA6	P3H4	15.4079
GATA6	CTSV	15.1926
GATA6	NID1	14.9814
GATA6	ENSBTAG00000051082	14.9323
GATA6	FHOD3	14.4274
GATA6	SSBP3	14.1626
GATA6	TSPAN5	13.9311
GATA6	ENSBTAG00000026119	13.9173
GATA6	ST6GALNAC1	13.1756
GATA6	COL18A1	13.1723
GATA6	PPP1R14A	13.1477
GATA6	HBE4	13.1328
GATA6	RASGRF2	13.0014
GATA6	RCN3	12.3051
GATA6	DPEP1	12.0894
NFE2	PLAT	19.6437
NFE2	NKD1	15.5721
NFE2	PRKD1	12.7174
NFE2	NRG1.1	10.7897
NFE2	CARD11	9.59336
NFE2	NR1H3	9.24552
NFE2	ENSBTAG00000053057	9.16644
NFE2	MRC2	8.59059
NFE2	FURIN	7.55966
NFE2	ENSBTAG00000046614	7.23481
NFE2	HOXB9	7.1093
NFE2	NRXN1.1	6.84697
NFE2	SLC7A4	6.58239
NFE2	CPXM2	6.30618
NFE2	ENSBTAG00000027213	6.29229
NFE2	PCDH7	6.01233
NFE2	KIF1C	5.9831
NFE2	NKX6-2	5.86781
NFE2	ENSBTAG00000014449	5.55131
NFE2	ID1	5.2753
NFE2	TKDP4	5.08151
NFE2	ZNF653	5.0769
NFE2	PLSCR3	4.9327
NFE2	SPINK4	4.90916
NFE2	ASS1	4.90411
NFE2	ENSBTAG00000049343	4.85828
NFE2	TTC39A	4.75753
NFE2	C10H15orf62	4.55436
NFE2	SAMD11	4.48775
NFE2	SCNN1B	4.11665
DLX5	TMSB10	79.7808
DLX5	HAND1	60.4639
DLX5	IFNT	53.3879
DLX5	ASS1	51.9899
DLX5	TECR	51.4787
DLX5	GALM	46.9975
DLX5	TKDP1	45.9542
DLX5	TKDP4	44.1138
DLX5	FADS1	40.5879
DLX5	ENSBTAG00000053057	39.9339
DLX5	IDH1	39.516
DLX5	ENSBTAG00000050611	39.1403
DLX5	PRXL2A	38.5648
DLX5	HSPB1	37.1744
DLX5	IFNT3	36.8838
DLX5	REEP5	35.6834
DLX5	FSCN1	35.6213
DLX5	FABP5	34.7863
DLX5	ARHGDIB	34.0978
DLX5	TPM4	33.9998
DLX5	IMPA2	33.3357
DLX5	IRX4	32.9097
DLX5	PUDP	32.4594
DLX5	IFNT2	31.8525
DLX5	STARD10	31.2002
DLX5	HES1	31.0555
DLX5	MYCN	30.0598
DLX5	NPC2	29.5945
DLX5	CAP1	29.291
DLX5	AKR1B1	29.2484
RXRA	TSPO	43.5373
RXRA	PTTG1IP	34.1837
RXRA	LHFPL2	33.0554
RXRA	UNC13D	32.5684
RXRA	IRX4	32.4096
RXRA	CD55	32.3434
RXRA	SATB2	32.1107
RXRA	VIPR2	32.1059
RXRA	RNF128	31.9245
RXRA	CD82	30.709
RXRA	ENSBTAG00000050611	30.4724
RXRA	CA2	29.8411
RXRA	IMPA2	28.6742
RXRA	DGCR2	28.4974
RXRA	TCF7L1	27.9488
RXRA	TMEM43	27.1366
RXRA	S100A11	27.1201
RXRA	SEPTIN5	26.0117
RXRA	RAC2	25.6643
RXRA	PLSCR3	24.6375
RXRA	CD24	23.8239
RXRA	LIMK2	22.9199
RXRA	SPINK4	22.5651
RXRA	ADGRL1	22.2124
RXRA	PLP2	22.0434
RXRA	FGFR3	22.0349
RXRA	HSD17B7	21.6132
RXRA	HSPB1	21.3547
RXRA	ECI1	21.0175
RXRA	PPFIA1	20.8352
SREBF2	CYP51A1	41.1807
SREBF2	MSMO1	38.9361
SREBF2	FDFT1	33.717
SREBF2	HMGCS1	30.732
SREBF2	HMGCR	29.7195
SREBF2	IDI1	25.8495
SREBF2	SQLE	18.767
SREBF2	PTDSS1	18.5003
SREBF2	ACLY	15.7392
SREBF2	IDH1	15.4842
SREBF2	CAMSAP3	15.4632
SREBF2	WNT4	15.1452
SREBF2	DOCK6	14.7515
SREBF2	FLNC	13.9765
SREBF2	ACSS2	12.9958
SREBF2	DHCR7	12.5378
SREBF2	FLVCR1	12.3106
SREBF2	ERBB3	12.2656
SREBF2	FADS1	11.8664
SREBF2	IFNT	11.181
SREBF2	TKDP1	11.0881
SREBF2	MSRB3	10.9684
SREBF2	LSS	10.7128
SREBF2	TKDP4	10.5331
SREBF2	ACAT2	10.4295
SREBF2	RNASE1.1	10.4256
SREBF2	ENSBTAG00000053057	10.3945
SREBF2	EPHX2	10.1777
SREBF2	RAP1B	10.0381
SREBF2	ALAS2	9.9851
E2F1	TOPAZ1	13.3322
E2F1	KLK1	8.22843
E2F1	COL5A1	7.1399
E2F1	MEIS1	6.24646
E2F1	SERPINH1	6.11667
E2F1	LUM	6.04505
E2F1	COL1A2	5.90832
E2F1	MCM3	5.47934
E2F1	CD302	5.35483
E2F1	EMP3	5.27495
E2F1	MRC2	4.89662
E2F1	CNBD1	4.70359
E2F1	C17H4orf33	4.57617
E2F1	P3H4	4.55851
E2F1	ENOX1	4.38076
E2F1	CPZ	4.20168
E2F1	SDR39U1	4.05987
E2F1	PRIM1	4.0017
E2F1	ZNF367	3.84293
E2F1	AREG	3.7868
E2F1	ZBBX	3.66913
E2F1	TPM2	3.63943
E2F1	CCNE2	3.58388
E2F1	CHAF1A	3.55027
E2F1	PTGS2	3.54211
E2F1	MCM6	3.48095
E2F1	GMNN	3.46589
E2F1	KNTC1	3.43742
E2F1	SUPT4H1	3.43437
E2F1	PCNA	3.42176
TCF4	RIPOR2	25.2319
TCF4	EPHB6	21.6134
TCF4	ENSBTAG00000054274	21.6009
TCF4	GALNT10	21.0217
TCF4	GLI3	19.6517
TCF4	GALNT17	19.4397
TCF4	FAM110B	18.2214
TCF4	MYOF	17.8824
TCF4	TTC28	16.1202
TCF4	PRSS12	15.9816
TCF4	TBX20	14.2321
TCF4	GNAQ	13.7522
TCF4	DNM3	11.0744
TCF4	SASH1	10.8429
TCF4	VOPP1	10.6375
TCF4	SLC25A21	10.502
TCF4	KIF26B	10.4217
TCF4	KIF21A	10.3756
TCF4	TMEM132C	10.1308
TCF4	NKD1	9.73255
TCF4	ANO6	9.63095
TCF4	IGFBP4	9.50217
TCF4	SGMS1	9.31548
TCF4	ARMC9	9.2257
TCF4	SLC10A7	9.21516
TCF4	PTPN14	9.17372
TCF4	PXDN	9.04269
TCF4	HECW2	9.02392
TCF4	ATP8A1	8.82511
TCF4	BBOX1	8.52745
IRF1	GBP5	39.1668
IRF1	PSME2	32.8617
IRF1	TAP1	31.4358
IRF1	PSMB10	28.8387
IRF1	BATF2	28.4362
IRF1	LGALS3BP	26.7121
IRF1	IFI6	25.5176
IRF1	PARP12	25.0506
IRF1	ENSBTAG00000001143	24.7261
IRF1	PSMB8	23.6872
IRF1	ENSBTAG00000045588	22.9813
IRF1	OAS1Z	22.7068
IRF1	PSMB9	21.6391
IRF1	BOLA-NC1	21.5758
IRF1	TAP2	21.0991
IRF1	CALCOCO2	21.0443
IRF1	B2M	20.9444
IRF1	DRAM1	20.2388
IRF1	APRT	19.9513
IRF1	TREX1	19.8078
IRF1	HERC6	19.7465
IRF1	ENSBTAG00000022489	19.7418
IRF1	TAPBP	18.8398
IRF1	PLA2G16	18.5769
IRF1	EPSTI1	18.0291
IRF1	PLSCR2	17.7893
IRF1	PARP14	17.6958
IRF1	NMI	17.5886
IRF1	SP110	17.2291
IRF1	OAS1Y	16.8488
ZNF444	NXNL2	11.0959
ZNF444	ENSBTAG00000004415	9.9011
ZNF444	AHSG	9.57079
ZNF444	TRMO	9.17971
ZNF444	ENSBTAG00000049340	8.60002
ZNF444	KIFC2	7.80971
ZNF444	GRAP	7.06136
ZNF444	ZNF283	6.62687
ZNF444	SLC48A1	6.40274
ZNF444	RASL11B	6.12881
ZNF444	SMYD4	5.80064
ZNF444	GRAMD1A	5.60854
ZNF444	PMVK	5.59968
ZNF444	LYPD3	5.42064
ZNF444	PTGES2	5.37024
ZNF444	H4C11	5.04297
ZNF444	GAS8	4.92489
ZNF444	CDH26	4.80183
ZNF444	KRT19	4.67164
ZNF444	PNLDC1	4.63759
ZNF444	ONECUT2	4.61833
ZNF444	ENSBTAG00000052155	4.48984
ZNF444	ENSBTAG00000019007	4.41832
ZNF444	ZMYND15	4.3873
ZNF444	GINS4	4.29698
ZNF444	FHOD1	4.2841
ZNF444	CCDC60	4.17852
ZNF444	CLN6	4.14431
ZNF444	DRC1	4.09521
ZNF444	ENSBTAG00000048426	3.99692
IRF5	KRT7	41.4377
IRF5	RAB6B	27.6284
IRF5	EGFL7	21.6552
IRF5	S100A11	21.2576
IRF5	CA2	20.2317
IRF5	RHCG	20.1369
IRF5	TSPO	18.622
IRF5	SEPTIN5	18.5845
IRF5	WNT5B	17.4791
IRF5	DBNDD2	15.7308
IRF5	EFS	15.643
IRF5	FBLN7	15.4951
IRF5	ANXA2	13.4748
IRF5	ENSBTAG00000008021	12.6956
IRF5	CCDC106	11.9873
IRF5	CC2D2A	11.8168
IRF5	ANKRD37	11.1007
IRF5	SERPINB8	10.867
IRF5	SBSPON	10.5677
IRF5	CD55	10.4157
IRF5	GPR146	9.81096
IRF5	CD24	9.40465
IRF5	ENSBTAG00000050611	9.07924
IRF5	NCCRP1	9.03476
IRF5	RAPH1	8.98848
IRF5	RASL11A	8.73318
IRF5	S100A10	8.64791
IRF5	DDIT4	8.40305
IRF5	TPM4	8.28698
IRF5	TMBIM6	8.28382
HOXB2	MYL4	25.8114
HOXB2	PITX1	19.6955
HOXB2	VIM	7.93486
HOXB2	IGF2	5.74509
HOXB2	ACTA2	4.53953
HOXB2	ENSBTAG00000038540	4.51048
HOXB2	SOX12	4.44842
HOXB2	KREMEN1	4.10156
HOXB2	PODNL1	4.09483
HOXB2	CAVIN3	4.04554
HOXB2	MAGED2	3.98632
HOXB2	TPM2	3.62573
HOXB2	TMED8	3.46527
HOXB2	PCGF3	3.30351
HOXB2	MMP2	3.23685
HOXB2	ABCC1	3.184
HOXB2	DDIT4L	3.05217
HOXB2	TGFB1I1	2.89417
HOXB2	PITX2	2.83471
HOXB2	ENSBTAG00000046972	2.80159
HOXB2	AQP1	2.79287
HOXB2	SPHK1	2.73379
HOXB2	PSAT1	2.73079
HOXB2	IGFBP4	2.7256
HOXB2	ENSBTAG00000024490	2.65375
HOXB2	GRIFIN	2.44943
HOXB2	ENSBTAG00000051269	2.3355
HOXB2	BCOR	2.28968
HOXB2	GNAT2	2.05046
HOXB2	PLSCR4	2.02107
FLI1	ANO3	20.5907
FLI1	SLIT2	12.292
FLI1	CDH11	11.0804
FLI1	ELMO1	11.0077
FLI1	JAM3	10.7424
FLI1	IGFBP4	10.6666
FLI1	RAPGEF4	10.138
FLI1	RNASE6	10.1143
FLI1	NRG1.1	9.89901
FLI1	VIM	9.73696
FLI1	SELP	9.12292
FLI1	UCHL1	8.2043
FLI1	SPP1	8.04287
FLI1	MAGED2	7.92669
FLI1	PDE7B	7.85995
FLI1	BDKRB2	7.66687
FLI1	PCDH7	7.61304
FLI1	TCF4	7.03884
FLI1	PITX1	6.67757
FLI1	EMP3	6.50641
FLI1	CLEC3B	6.22264
FLI1	COLEC12	5.30809
FLI1	ENSBTAG00000050644	5.06626
FLI1	FXYD5	4.86805
FLI1	EBF1	4.81926
FLI1	GALNS	4.75926
FLI1	VWF	4.69725
FLI1	HLF	4.25601
FLI1	CD68	4.25208
FLI1	ITGA1	4.22268
HOXC8	GPD1	7.95609
HOXC8	MYL4	7.8919
HOXC8	ADIRF	7.68099
HOXC8	ACTA2	7.41937
HOXC8	MAGED2	6.00951
HOXC8	PITX1	5.72335
HOXC8	PLAT	5.50012
HOXC8	IGF2	5.43821
HOXC8	TLL1	4.53605
HOXC8	PACSIN1	4.52081
HOXC8	TGFB1I1	4.33902
HOXC8	SLC35E4	3.98464
HOXC8	KCND3	3.43521
HOXC8	HBE1.1	3.36864
HOXC8	VIM	3.16723
HOXC8	GAL	2.97057
HOXC8	ACAD10	2.77753
HOXC8	POPDC3	2.64499
HOXC8	BCL2L11	2.62924
HOXC8	C3H1orf87	2.50324
HOXC8	ENSBTAG00000049929	2.48653
HOXC8	CCDC153	2.3827
HOXC8	ENSBTAG00000050593	2.26143
HOXC8	CD37	2.1416
HOXC8	HBE4	2.01695
HOXC8	MGC137454	1.95784
HOXC8	CTDSPL2	1.86474
HOXC8	SCAMP5	1.84935
HOXC8	TPM2	1.77911
HOXC8	ENSBTAG00000054666	1.56709
SNAI2	VIM	76.5942
SNAI2	FBLN1	69.9449
SNAI2	SPARC	66.7526
SNAI2	COL1A1	60.1942
SNAI2	COL3A1	53.6499
SNAI2	COL1A2	50.4495
SNAI2	KLK1	50.4481
SNAI2	LUM	49.123
SNAI2	RBP4	48.0097
SNAI2	IGF2	47.7794
SNAI2	PITX1	47.4594
SNAI2	EMP3	32.6682
SNAI2	MMP2	30.873
SNAI2	COL5A1	30.8586
SNAI2	LOX	30.5182
SNAI2	P3H4	28.8624
SNAI2	PCOLCE	28.1311
SNAI2	EFEMP2	26.6227
SNAI2	RARRES1	24.6306
SNAI2	COL18A1	22.6992
SNAI2	DCN	22.5255
SNAI2	UCHL1	22.5058
SNAI2	GPX7	21.8047
SNAI2	KCNE1	21.0353
SNAI2	AEBP1	20.7221
SNAI2	AQP1	20.6621
SNAI2	FMOD	20.5716
SNAI2	FKBP7	19.1438
SNAI2	FKBP10	18.9676
SNAI2	IDNK	18.4844
ZNF354C	GJB4	12.3748
ZNF354C	TMEM45A	12.2927
ZNF354C	AEBP1	10.0766
ZNF354C	RBP4	8.65891
ZNF354C	KANK2	7.07377
ZNF354C	SPARC	6.75348
ZNF354C	ALAS2	6.58356
ZNF354C	STC1	6.48492
ZNF354C	DCN	5.5797
ZNF354C	ODC1	4.47797
ZNF354C	AQP1	4.22192
ZNF354C	IGF2	3.92082
ZNF354C	PXDC1	3.85417
ZNF354C	LUM	3.61056
ZNF354C	ENSBTAG00000049928	3.36777
ZNF354C	NID2	3.06993
ZNF354C	PHGDH	2.93318
ZNF354C	IGFL1	2.65386
ZNF354C	POLN	2.57608
ZNF354C	ENSBTAG00000052846	2.52854
ZNF354C	PTGR1	2.52418
ZNF354C	ITGA7	2.50402
ZNF354C	ITGB2	2.46118
ZNF354C	ENOX2	2.40198
ZNF354C	FSTL1	2.37298
ZNF354C	FABP5	2.28072
ZNF354C	NHERF2	2.24565
ZNF354C	ZBTB8A	2.24049
ZNF354C	HEXB	2.20684
ZNF354C	C15H11orf96	2.04664
PITX2	COL4A1	42.7548
PITX2	COL18A1	39.0886
PITX2	TSPAN2	38.2426
PITX2	ENSBTAG00000026119	32.5019
PITX2	PPP1R14A	30.46
PITX2	PITX1	29.7397
PITX2	MAGED2	28.1732
PITX2	COLEC12	27.4295
PITX2	FST	27.3215
PITX2	APOA1	26.7023
PITX2	FABP3	26.0983
PITX2	IGFBP4	26.0961
PITX2	APOE	25.7028
PITX2	RSPO3	25.3961
PITX2	DPEP1	24.661
PITX2	APOA2	24.5694
PITX2	COL4A2	23.6871
PITX2	ENSBTAG00000052397	23.033
PITX2	VCAN	22.9508
PITX2	JAM2	21.1526
PITX2	CAVIN3	20.717
PITX2	TUBB4A	20.1719
PITX2	VIM	19.2432
PITX2	GJB1	18.6185
PITX2	CLSTN3	18.1779
PITX2	LIPC	17.596
PITX2	SERPINH1	17.2201
PITX2	ENSBTAG00000051845	17.1631
PITX2	MYL4	17.031
PITX2	FETUB	17.0211
GATA5	MYL4	6.24716
GATA5	COL18A1	5.55636
GATA5	CLN6	5.37332
GATA5	CCN4	4.7233
GATA5	FSTL1	4.09844
GATA5	FMOD	4.06723
GATA5	COL5A1	3.63242
GATA5	RAI1	3.49223
GATA5	PRM3	3.48924
GATA5	B3GNT9	2.87618
GATA5	FBLN1	2.79341
GATA5	ENSBTAG00000054994	2.68589
GATA5	LYSMD1	2.42632
GATA5	NXPH2	2.26061
GATA5	IGFBP4	2.15449
GATA5	SLC22A17	2.10764
GATA5	KIAA0408	2.06966
GATA5	RAMP2	2.02933
GATA5	IGF2	2.02681
GATA5	TMEM185A	1.89079
GATA5	HS3ST3B1	1.8717
GATA5	N6AMT1	1.79103
GATA5	SLC25A22	1.7429
GATA5	TUBB6	1.73406
GATA5	NID2	1.71505
GATA5	COL1A1	1.60106
GATA5	ENSBTAG00000052141	1.5678
GATA5	MAPK3	1.55241
GATA5	ING5	1.47297
GATA5	KIF9	1.4719
ETS1	FLI1	17.7746
ETS1	ANO3	12.9237
ETS1	ATP13A4	9.84483
ETS1	LY6G6C	7.80886
ETS1	RAPGEF4	6.99312
ETS1	NRG1.1	6.9344
ETS1	ELMO1	6.78771
ETS1	ITGA1	6.3868
ETS1	LHX6	6.27787
ETS1	CLEC3B	6.03989
ETS1	RFTN2	5.91006
ETS1	SLC38A1	5.86452
ETS1	PDE7B	5.82837
ETS1	LRRC8C	5.52537
ETS1	BDKRB2	5.24919
ETS1	ENSBTAG00000052397	5.23582
ETS1	VWF	5.11531
ETS1	COL4A2	4.96345
ETS1	RRAS2	4.88153
ETS1	HEG1	4.76184
ETS1	ERBIN	4.69626
ETS1	EBF1	4.66931
ETS1	BPIFA1	4.64896
ETS1	LY6G6E	4.62402
ETS1	RUNDC3B	4.55487
ETS1	COL4A1	4.5344
ETS1	ZNF423	4.40696
ETS1	TMEM117	4.16709
ETS1	EMCN	4.15802
ETS1	MYRIP	4.07765
TFE3	SERTAD1	10.5053
TFE3	FLT3LG	7.69156
TFE3	ENSBTAG00000054669	7.39719
TFE3	ENSBTAG00000049237	6.23027
TFE3	DUSP5	5.34776
TFE3	CD8A	5.25858
TFE3	NIPBL	4.49445
TFE3	COL28A1	4.39779
TFE3	LGMN	4.3971
TFE3	AMH	4.32979
TFE3	SLC52A3	4.2418
TFE3	BEST3	4.09847
TFE3	LYZ2	3.59422
TFE3	RASL11A	3.50325
TFE3	ENSBTAG00000049168	3.14361
TFE3	DLGAP4	3.0074
TFE3	RNF144B	2.81098
TFE3	LENG8	2.76646
TFE3	JUNB	2.68541
TFE3	CLDN12	2.52012
TFE3	C16H1orf174	2.49251
TFE3	SPINK4	2.39778
TFE3	SRGN	2.38002
TFE3	CD14	2.34295
TFE3	MAP3K11	2.32338
TFE3	LEMD1	2.28438
TFE3	CTPS2	2.27559
TFE3	RNASEK	2.27098
TFE3	SLC39A14	2.24834
TFE3	FLRT3	2.24017
NANOG	ENSBTAG00000007075	36.2963
NANOG	ZBTB5	18.2137
NANOG	ENSBTAG00000051318	16.9451
NANOG	CD81	15.3519
NANOG	ENSBTAG00000023192	15.3262
NANOG	GFOD2	14.7989
NANOG	RBMXL2	13.5397
NANOG	FRMD5	13.307
NANOG	UCHL1	12.7897
NANOG	SYCP3	12.7743
NANOG	BEX2.1	12.0716
NANOG	GGT5	12.0153
NANOG	ENSBTAG00000032603	11.6678
NANOG	ENSBTAG00000019546	10.5226
NANOG	ID1	10.1409
NANOG	NOVA1	9.93852
NANOG	NKAPL	9.7129
NANOG	IFITM3	9.64658
NANOG	B9D2	9.19294
NANOG	SNAP91	9.06141
NANOG	STC2	8.81488
NANOG	JAM2	8.36429
NANOG	STMN2	8.36394
NANOG	CABP1	8.20995
NANOG	FBLN1	7.31091
NANOG	PCSK1N	7.25372
NANOG	DCDC2	7.09893
NANOG	CTHRC1	7.00076
NANOG	BEX3	6.8488
NANOG	GPC4	6.81476
GATA1	HBE1	19.1442
GATA1	ENSBTAG00000038921	19.0512
GATA1	IGF2	3.32066
GATA1	CLDN8	2.91129
GATA1	SPTA1	2.34367
GATA1	IL3RA	2.08445
GATA1	PDZD4	1.74366
GATA1	TMEM131L	1.28925
GATA1	SSX5	1.28472
GATA1	ACTA2	1.2474
GATA1	COL9A1	1.15865
GATA1	CAMK1G	1.13383
GATA1	AHSP	1.12378
GATA1	SLC25A10	1.11458
GATA1	RGS21	0.917298
GATA1	PABPC4	0.865955
GATA1	ACAP3	0.849617
GATA1	TBX15	0.810671
GATA1	ASIC2	0.800735
GATA1	SDR16C5	0.797058
GATA1	ZC3H7B	0.75391
GATA1	SCN3A	0.669766
GATA1	ENSBTAG00000031558	0.565294
GATA1	MEST	0.561783
GATA1	CHST7	0.559814
GATA1	ESRRA	0.518563
GATA1	SLC25A37	0.480441
GATA1	NOTCH3	0.460796
GATA1	PTP4A3	0.423867
GATA1	PWP2	0.418867
IRF7	IFI27	46.2943
IRF7	ISG15	44.7021
IRF7	MX1	44.6744
IRF7	PSME1	41.9878
IRF7	UBA7	39.1529
IRF7	PARP14	38.6481
IRF7	MARCKSL1	38.4314
IRF7	IFIT5	37.7853
IRF7	TAPBP	36.7804
IRF7	APRT	35.8965
IRF7	ENSBTAG00000048782	35.5592
IRF7	IRF9	33.7687
IRF7	S100A11	33.1704
IRF7	ZBP1	32.5621
IRF7	B2M	31.7312
IRF7	OAS1Y	31.6508
IRF7	EPSTI1	30.6695
IRF7	TREX1	29.9483
IRF7	ENSBTAG00000045588	29.6186
IRF7	SP110	28.6848
IRF7	ANXA1	28.0382
IRF7	USP18	27.9746
IRF7	BOLA-NC1	26.9675
IRF7	ENSBTAG00000019437	26.4254
IRF7	DRAM1	26.1121
IRF7	ARL6IP5	26.0824
IRF7	PARP10	26.0282
IRF7	XAF1	25.5475
IRF7	HERC6	25.5352
IRF7	RNPEP	25.2595
MEIS1	SNX31	31.5123
MEIS1	PLCE1	27.1613
MEIS1	FRAS1	19.6688
MEIS1	ENSBTAG00000054250	13.4332
MEIS1	SLC8A3	13.4291
MEIS1	SHC4	11.2977
MEIS1	ENSBTAG00000049263	11.2097
MEIS1	CERS3	10.9561
MEIS1	CSH2	9.38359
MEIS1	ATP10B	9.24097
MEIS1	LPCAT1	9.22651
MEIS1	CDCA7L	9.13141
MEIS1	THRB	8.76499
MEIS1	WNT10B	8.75233
MEIS1	CTTNBP2	8.5855
MEIS1	GHR	8.19306
MEIS1	LRRC3B	8.06314
MEIS1	RFX3	7.95192
MEIS1	LCAT	7.66003
MEIS1	PAG15	7.43396
MEIS1	FN1	7.26317
MEIS1	GRIA4	7.01813
MEIS1	SIPA1L2	6.85522
MEIS1	KIRREL1	6.76427
MEIS1	PRP2	6.52498
MEIS1	SLC24A4	6.32544
MEIS1	RBMS1	6.26201
MEIS1	LYPD6B	5.95195
MEIS1	BACE2	5.85538
MEIS1	NIPAL4	5.79686
