# Supplementary material for: A longitudinal single-nucleus transcriptomic atlas of the bovine placenta reveals dynamic cellular hierarchies and regulatory networks during gestation
Source: Research Square preprint supplement (doi:10.21203/rs.3.rs-8046408/v1), 2025-11-26
Supplement: Supplementary file 5 [file 7e10e5342d0e4a969a03f1bb.xlsx]

## Sheet: S1
cow_pregnancy_days_Merged_celltype_pvalue
celltype	pvalue
IFNT+Tro_2	1.1e-12
Mural TE	1.18e-12
Hypoblast	2.01e-12
Polar TE	7.05e-12
Tro_B1	3.94e-11
Epiblast	2.02e-10
Tro_U2	3.03e-09
Tro_B2	1.07e-07
Urothelial Epi	1.72e-06
IFNT+Tro_1	1.39e-05
Tro_U1	0.000103439
LEs	0.00188519
Mes	0.00230459
Erythrocyte	0.00365323
Fibs	0.0552716
Tro_B6	0.205662
HBCs	0.357153
Monocyte	0.412238
Tro_B4	0.427066
Tro_U4	0.477283
Tro_U3	0.483535
Endo	0.487789
Tro_B3	0.494502
GECs	0.495063
VSMC	0.498307
Tro_B5	0.499758

## Sheet: S2
cow_pregnancy_days_Merged_Stage_pvalue
celltype	pvalue
E105	0.498396
E12	4.05289e-12
E14	8.08644e-12
E16	0.000236802
E18	3.1924e-08
E188	0.489095
E24	3.35804e-05
E240	0.492941
E280	0.494429
E30	9.31576e-06
E50	0.000228086
E58	0.491494
E84	0.489915

## Sheet: S3
cow_pregnancy_days_gene_PCC
	PCC
ENSBTAG00000054829	-0.0107082
ENSBTAG00000001753	0.0657732
RIPK4	0.162225
RCAN1	0.0489434
KCNE1	0.0295776
PRDM15	0.065553
SMIM11	0.234008
KCNE2	0.0261821
MRPS6	0.181981
C2CD2	0.214369
ATP5PO	0.259721
ZBTB21	0.0948278
ITSN1	0.034177
CRYZL1	0.0678557
ABCG1	-0.181303
DONSON	0.108879
TFF3	-0.0193226
SON	0.0791097
GART	0.236484
DNAJC28	0.180208
TMEM50B	0.167804
RSPH1	0.00387259
IFNGR2	-0.0038478
IL1RAP	-0.0154288
SLC37A1	0.202103
CLDN1	0.160745
P3H2	-0.0985947
TP63	0.189709
IFNAR1	-0.066029
IL10RB	0.0484839
PDE9A	-0.144718
IFNAR2	-0.0837341
LPP	-0.0643124
WDR4	0.130021
BCL6	0.0256754
OLIG1	0.00310956
C1H21orf62	-0.0321459
PAXBP1	0.0243078
NDUFV3	0.296439
SYNJ1	0.0820388
MASP1	-0.0825537
PKNOX1	0.0965476
CBS	0.23458
U2AF1	0.284121
CFAP298	0.12772
ST6GAL1	-0.0907121
EVA1C	-0.132574
ENSBTAG00000006872	0.0148689
RFC4	0.20684
EIF4A2	0.148263
SIK1	-0.0117016
URB1	0.0964979
MRAP	0.0359827
MIS18A	0.270991
KNG1	-0.0188175
HRG	0.0287044
FETUB	0.154842
AHSG	0.0963919
DNAJB11	0.273681
HSF2BP	0.0913877
TBCCD1	0.0228697
CRYGS	-0.00610402
RRP1B	0.220052
PDXK	0.210256
CSTB	0.0658271
CSTB.1	0.310554
HUNK	0.0225648
RRP1	0.201085
SCAF4	0.0975216
AGPAT3	0.231162
SOD1	0.202789
TRAPPC10	0.131613
PWP2	0.174755
GATD3	0.241313
DGKG	-0.0313385
ICOSLG	0.00864943
ETV5	0.0425412
DNMT3L	-0.0222061
ENSBTAG00000011305	-0.00972031
TIAM1	0.134808
ENSBTAG00000048631	0.149556
TRA2B	0.12345
IGF2BP2	-0.0970484
AIRE	0.040487
SENP2	0.142508
LIPH	0.261855
TMEM41A	0.208944
ENSBTAG00000051579	0.027703
MAP3K13	-0.00847321
PFKL	0.281334
EHHADH	0.039512
CFAP410	0.205852
CLDN8	0.0426459
TRPM2	-0.0253266
ENSBTAG00000007296	0.0188343
C1H3orf70	-0.112707
LRRC3	0.032089
VPS8	0.0258292
TSPEAR	0.0718052
GRIK1	-0.0068014
UBE2G2	0.28988
SUMO3	0.208093
BACH1	0.0268112
ENSBTAG00000050932	0.0772778
MAGEF1	0.0454463
PTTG1IP	0.249355
ITGB2	0.0764657
CCT8	0.287744
EPHB3	-0.0200445
CHRD	0.003931
THPO	-0.0254232
USP16	0.237745
POLR2H	0.288587
SLX9	0.290632
CLCN2	0.173684
ADARB1	-0.0631837
POFUT2	0.126921
RWDD2B	0.0531135
LTN1	0.104315
FAM131A	0.0817651
ENSBTAG00000038433	0.0155718
N6AMT1	0.138283
EIF4G1	0.263502
PSMD2	0.26571
COL18A1	-0.0387408
ECE2	0.0195746
ADAMTS1	0.0701632
SLC19A1	0.0925622
CYYR1	-0.187569
CAMK2N2	0.113851
ECE2.1	0.30061
PCBP3	-0.03431
ALG3	0.249063
VWA5B2	-0.0082906
ABCF3	0.172189
COL6A1	-0.0596492
AP2M1	0.184707
APP	-0.133075
DVL3	0.13657
EIF2B5	0.236838
COL6A2	-0.0743299
ABCC5	0.188856
FTCD	0.0285047
PARL	0.176728
LSS	0.144178
MAP6D1	0.0276843
GABPA	0.174897
ATP5PF	0.316562
MCM3AP	0.103361
YEATS2	0.0954579
YBEY	0.264597
JAM2	-0.139505
ENSBTAG00000014449	0.173983
KLHL24	-0.00131079
KLHL6	-0.0330983
MRPL39	0.260423
PCNT	0.160922
DIP2A	0.0447727
MCF2L2	0.0692678
ENSBTAG00000032217	0.0206713
B3GNT5	0.152935
MCCC1	0.159783
S100B	-0.0134308
PRMT2	0.0457106
DCUN1D1	0.0778957
ENSBTAG00000052513	0.0377164
FBXO25	0.0995656
TDRP	0.0800592
ATP11B	0.106566
ENSBTAG00000046447	-0.00532483
RUNX1	-0.171379
SETD4	0.041882
CBR1	-0.0108015
ENSBTAG00000052342	0.0213336
MGC127133	0.0479158
CBR3	0.119836
ENSBTAG00000053201	0.1362
DOP1B	0.0475883
TMPRSS15	-0.0167742
MORC3	0.116833
CHAF1B	0.186857
C1H21orf91	-0.0300849
SIM2	0.0457324
BTG3	0.098809
CXADR	0.27339
HLCS	-0.0525824
PIGP	0.11351
TTC3	-0.014419
VPS26C	0.105118
USP25	0.0092349
DYRK1A	-0.0293471
NRIP1	0.110472
KCNJ6	-0.00715087
HSPA13	0.159066
ABCC13	-0.052122
ETS2	0.0497506
RBM11	0.0584563
LIPI	0.00573101
DNAJC19	0.322808
FXR1	0.133901
ENSBTAG00000046755	-0.0511444
PIK3R4	0.0824781
COL6A6	-0.00423964
CCDC39	-0.0196141
TTC14	0.139995
ROBO2	-0.0915756
COL6A5	-0.0666894
ROBO1	-0.0302066
PEX5L	-0.0219934
USP13	0.000652032
CAPN7	0.0163767
NDUFB5	0.357027
MRPL47	0.289685
SH3BP5	0.109236
ENSBTAG00000030592	0.107046
METTL6	0.108006
EAF1	0.135614
ACTL6A	0.233998
GNB4	0.0364481
MFN1	0.0408189
HACL1	0.0823039
ZNF639	0.0839273
BTD	0.124812
KCNMB3	-0.0308068
PIK3CA	-0.0121903
ENSBTAG00000054655	-0.00880246
ZMAT3	0.0472104
ANKRD28	0.0409944
GBE1	0.00297863
ENSBTAG00000050181	0.0721007
GALNT15	0.0950365
DPH3	0.262898
OXNAD1	0.0879379
RFTN1	-0.100883
PLCXD1	0.278379
GTPBP6	0.141073
DAZL	0.00568358
ENSBTAG00000052803	0.0296507
ENSBTAG00000045974	0.010471
PLCL2	-0.0570031
CADM2	-0.016693
TBC1D5	-0.0554533
TBL1XR1	-0.0068774
ENSBTAG00000054926	0.107092
VGLL3	-0.0189137
SATB1	0.0637624
CHMP2B	0.210355
CGGBP1	0.197704
ZNF654	0.0719117
C1H3orf38	0.194927
KCNH8	0.0404497
NAALADL2	0.0848981
EFHB	0.0995006
RAB5A	0.117306
EPHA3	0.0234613
NLGN1	0.0357374
PROS1	0.0385729
KAT2B	0.0412916
ENSBTAG00000012401	0.0452944
ARL13B	0.0534706
STX19	-0.00459511
NSUN3	0.0568511
SPATA16	0.224839
ECT2	0.138302
NCEH1	0.0158051
TNFSF10	-0.11031
GHSR	0.0105211
EPHA6	-0.0121367
SGO1	0.220267
FNDC3B	-0.00222526
ZNF596	0.00863765
ARL6	0.077064
CRYBG3	0.0474799
RIOX2	0.19125
PLD1	-0.0180607
ENSBTAG00000049102	0.0203433
TXLNA	0.0987008
KPNA6	0.07833
CLDND1	0.161412
ENSBTAG00000049543	0.0811936
TMEM39B	-0.00179988
CPOX	0.0937223
ENSBTAG00000049814	0.0546365
KHDRBS1	0.12196
ST3GAL6	-0.0562453
ASMT	-0.0246865
DCBLD2	0.0240496
COL8A1	-0.0815726
CMSS1	0.140295
FILIP1L	0.0299804
TMEM30C	-0.00451712
TMSB4	0.131079
TBC1D23	0.0220143
NIT2	0.142332
TNIK	0.0656777
TOMM70	0.219641
LNP1	0.104099
ENSBTAG00000013321	0.0182054
TMEM45A	-0.047459
TFG	0.208159
ENSBTAG00000053387	0.0298467
IMPG2	-0.0307608
SENP7	-0.0503063
ENSBTAG00000018731	0.0464016
TRMT10C	0.216793
PCNP	0.184158
ZBTB11	0.111641
RPL24	0.283614
CEP97	0.0622832
NXPE3	0.0731219
NFKBIZ	-0.0507598
ALCAM	-0.00433999
SLC2A2	0.024454
EIF5A2	0.0888359
RPL22L1	0.341682
CBLB	-0.126553
SLC7A14	-0.00462464
CLDN11	-0.00894529
SKIL	-0.0274367
PRKCI	0.139038
PHC3	-0.0445906
BBX	0.000360727
GPR160	0.0224406
ENSBTAG00000045991	0.0374374
SEC62	0.147049
MYNN	0.0794456
ACTRT3	0.051041
CD47	-0.0515809
IFT57	0.0209525
HHLA2	-0.0309948
MECOM	-0.123598
MYH15	-0.00907077
CIP2A	0.100801
DZIP3	-0.0280771
DPPA2	0.17191
DPPA4	0.215438
ENSBTAG00000022275	0.236738
GOLIM4	0.0817099
SERPINI1	0.0639512
PDCD10	0.235655
NECTIN3	0.0196109
WDR49	-0.00695631
ZBBX	0.00700223
PLCXD2	0.100422
BCHE	-0.0558125
PHLDB2	-0.0461922
ABHD10	0.126265
SI	0.00618343
TMPRSS7	-0.0170111
C1H3orf52	0.0437571
SLC9C1	0.0316122
ENSBTAG00000048551	0.0241728
CD200	-0.161639
BTLA	0.0289784
ENSBTAG00000018312	0.0661207
ATG3	0.165571
SLC35A5	0.0486866
ENSBTAG00000027213	0.232044
CCDC80	-0.136271
OTOL1	0.0158704
SPTSSB	0.0941252
GTPBP8	0.107227
NEPRO	0.160397
NMD3	0.160748
ENSBTAG00000000242	0.0899166
BOC	-0.0257571
ENSBTAG00000050116	-0.0126347
ENSBTAG00000013920	0.0145897
PPM1L	0.173092
ENSBTAG00000055054	0.0419467
SPICE1	0.0738074
SIDT1	0.102598
KPNA4	0.109109
TRIM59	0.0869391
SMC4	0.154198
USF3	0.114211
NAA50	0.195464
IFT80	-0.0686761
ATP6V1A	0.173256
ENSBTAG00000052570	-0.0351231
GRAMD1C	0.162087
ZDHHC23	0.118611
SCHIP1	-0.0340478
CCDC191	0.0455075
QTRT2	0.133625
ZBTB20	-0.129977
MFSD1	0.180889
ENSBTAG00000047946	0.0261339
GAP43	-0.00456969
RARRES1	-0.0781173
GFM1	0.185973
LXN	0.173894
MLF1	0.0278023
LSAMP	0.00792311
RSRC1	0.0949798
SHOX2	0.0911785
ENSBTAG00000048452	0.0194603
VEPH1	0.0139611
PTX3	-0.143469
IGSF11	0.0992408
CCNL1	0.0574143
UPK1B	0.0818377
B4GALT4	0.0351052
ARHGAP31	-0.0767127
ENSBTAG00000050129	-0.00468618
TMEM39A	0.104428
TIPARP	-0.00307193
SSR3	0.264846
POGLUT1	0.0683981
TIMMDC1	0.0941387
ADPRH	-0.128966
KCNAB1	0.0010792
COX17	0.211999
CFAP91	-0.0270414
GMPS	0.203807
SLC33A1	0.151231
C1H3orf33	0.0789326
GSK3B	0.0988258
PLCH1	0.0471848
GPR156	0.000946463
LRRC58	0.0369128
FSTL1	-0.146136
NDUFB4	0.298034
HGD	0.00242773
RABL3	0.119438
MME	0.137071
GTF2E1	0.162815
GPR149	-0.0146284
DHX36	0.185968
STXBP5L	0.0411458
ARHGEF26	0.0756132
ENSBTAG00000047341	0.00133817
RAP2B	0.235557
POLQ	0.117964
P2RY1	0.127343
ENSBTAG00000033740	0.0328163
MBNL1	-0.113691
HCLS1	-0.100129
IGSF10	-0.0589194
GOLGB1	0.107646
IQCB1	0.0597009
MED12L	0.0651516
EAF2	0.0418973
ENSBTAG00000033166	0.0580023
ENSBTAG00000001442	0
ILDR1	0.0717037
P2RY12	-0.00626433
GPR87	-0.0282031
P2RY14	-0.0504933
GPR171	-0.00958434
CASR	0.0622897
CLRN1	0.0335591
SIAH2	0.117267
CSTA	0.084012
MIX23	0.315208
ERICH6	-0.0225621
SELENOT	0.205573
FAM162A	0.319815
EIF2A	0.155789
WDR5B	0.0283836
KPNA1	0.0202057
PARP9	-0.0501053
DTX3L	-0.0197587
SERP1	0.237006
PARP14	-0.0549625
TSC22D2	0.115435
HSPBAP1	0.0824978
PFN2	0.0811913
SLC49A4	0.091766
SEMA5B	0.103393
RNF13	0.0265238
PDIA5	0.209916
ANKUB1	-0.0137271
COMMD2	0.124108
WWTR1	-0.0691879
SEC22A	0.0636228
ADCY5	-0.0385446
TM4SF1	0.0131569
HACD2	0.168217
CP	-0.167657
MYLK	-0.00571773
ENSBTAG00000054441	0.00482595
CCDC14	0.0309472
HPS3	0.0097011
KALRN	-0.108848
HLTF	0.068901
ENSBTAG00000053238	-0.00172613
GYG1	0.0525793
UMPS	0.217084
ITGB5	0.0375164
ENSBTAG00000053400	0
MUC13	0.0149611
PLSCR2	-0.0675175
HEG1	-0.100657
PLSCR1	-0.0286585
SLC12A8	0.0116209
PLSCR4	-0.0509691
ZNF148	0.0232308
SNX4	0.158505
PLOD2	0.0131842
OSBPL11	-0.0718091
LMLN	0.0237344
RPL35A	0.273616
IQCG	-0.00691458
ENSBTAG00000049240	0.0239272
LRCH3	-0.00654662
DIPK2A	0.131964
FYTTD1	0.10461
SLC9A9	-0.0403196
RUBCN	0.00809114
CHST2	-0.115989
U2SURP	0.119925
MUC20	0.00426794
ENSBTAG00000038111	0.0289602
PCOLCE2	-0.0153769
MUC4	0.00219606
TRPC1	-0.0737374
PLS1	0.245339
TNK2	0.00237538
TFRC	0.0158904
ZDHHC19	0.0893995
SLC51A	0.00793053
PCYT1A	0.152443
ATR	0.0400396
DYNLT2B	0.064037
TM4SF19	-0.034738
UBXN7	0.0377154
RNF168	0.077008
WDR53	0.140964
FBXO45	0.126156
NRROS	-0.107946
CEP19	0.155615
ENSBTAG00000049165	0.0308203
PIGX	0.0737209
PAK2	0.0969202
SENP5	0.111847
NCBP2	0.302543
NCBP2AS2	0.1405
PIGZ	0.111263
MELTF	0.0269296
XRN1	-0.0118305
GK5	0.112121
TFDP2	0.16226
ENSBTAG00000019007	0.0254699
ATP1B3	0.287879
GRK7	0.0101343
RNF7	0.178322
RASA2	0.0393457
ZBTB38	-0.0414341
PXYLP1	0.100725
SPSB4	0.0565833
SLC25A36	0.058423
ENSBTAG00000052041	0.0348556
CLSTN2	-0.00126114
NMNAT3	-0.0468944
RBP1	-0.0109305
COPB2	0.190694
MRPS22	0.239404
ENSBTAG00000051220	0.00071565
PIK3CB	0.248583
FAIM	0.0203649
CEP70	0.00574228
ENSBTAG00000026861	-0.00466072
ESYT3	-0.0514114
MRAS	0.134261
ARMC8	0.0551799
DBR1	0.14171
DZIP1L	-0.0846258
DLG1	0.0149837
IL20RB	0.136305
NCK1	0.0136037
SLC35G2	-0.0248343
ENSBTAG00000054797	-0.0517527
STAG1	-0.0329119
PCCB	0.205869
MSL2	0.0788772
PPP2R3A	0.0869683
EPHB1	-0.0573555
CEP63	0.0580776
ANAPC13	0.207339
AMOTL2	0.0676487
RYK	0.116457
SLCO2A1	0.0305006
RAB6B	0.139886
SRPRB	0.24317
TF	0.0273526
INHCA	0.153163
TOPBP1	0.170082
CDV3	0.255807
BFSP2	-0.0316437
TMEM108	-0.021225
ENSBTAG00000049044	-0.00111163
NPHP3	0.00134364
UBA5	0.131665
ACAD11	0.139718
DNAJC13	0.0438097
ACP3	0.152196
CPNE4	-0.0160614
MRPL3	0.16806
NUDT16	0.19492
NEK11	-0.015664
ASTE1	0.058903
ATP2C1	-0.00579869
PSMG1	0.273732
BRWD1	-0.00503056
HMGN1	0.256461
ENSBTAG00000023106	0.169783
GET1	0.119688
SH3BGR	-0.0952048
B3GALT5	0.0347825
IGSF5	0.180315
PCP4	0.0510761
DSCAM	0.0324333
BACE2	-0.0495916
FAM3B	-0.0217043
MX1	-0.00442176
TMPRSS2	0.0654418
ENSBTAG00000048225	0.0297654
BDH1	0.140505
PPP1R2	0.18653
ACAP2	-0.00174734
ENSBTAG00000054986	-0.00628727
XXYLT1	0.075888
LSG1	0.146589
TMEM44	-0.0915823
ATP13A3	-0.0154955
HES1	0.225515
OPA1	0.114184
ATP13A4	0.0520402
ATP13A5	0.0426303
PLAAT1	0.0858856
MB21D2	-0.00964609
FGF12	-0.0968678
CCDC50	0.0445327
HEPH	-0.0347472
DIAPH2	-0.0487271
VSIG4	-0.0821033
DIAPH2.1	-0.141222
MSN	0.0823586
LAS1L	0.249649
ZC3H12B	-0.00699824
ZC4H2	-0.0061122
MTMR8	-0.122805
ENSBTAG00000046004	0.0315328
ENSBTAG00000005395	0.0959294
ASB12	-0.0160265
AMER1	0.0250824
ARHGEF9	-0.198555
PCDH19	-0.0858724
TSPAN6	0.107947
ENSBTAG00000008911	-0.0308067
ZNF674	0.0654246
BEX2	0.11827
GPRASP2	0.0387795
ENSBTAG00000047213	0.0135078
ARMCX5	0.0459424
ENSBTAG00000020522	0.0102733
BEX5	0.183198
DIPK2B	-0.124005
KDM6A	0.0143447
DUSP21	0.00104409
ARMCX2	0.0017775
ENSBTAG00000050056	0.0198351
ARMCX3	0.0878528
ARMCX1	-0.0676375
ENSBTAG00000038204	0
ARMCX4	-0.0167922
HNRNPH2	0.174597
GLA	0.139205
RPL36A	0.313014
FUNDC1	0.249266
BTK	-0.0370872
EFHC2	-0.0372616
NDP	-0.0938428
TIMM8A	0.367165
TAF7L	0.0204827
DRP2	0.00591628
MAOB	-0.0614113
CENPI	0.166654
MAOA	-0.0717097
TMEM35A	0.0275199
ENSBTAG00000053172	0.0164589
PPP1R2C	-0.0150828
ARL13A	0.0380852
XKRX	0.0513689
NOX1	0.0561217
CASK	-0.0231472
CSTF2	0.190046
SYTL4	0.00732118
GPR34	0.0742438
NYX	-0.0212748
DDX3X	0.119505
BEX3	0.0583992
TCEAL9	-0.0106632
BEX2.1	0.0683534
TCEAL8	0.131284
ENSBTAG00000051378	0.0667089
ENSBTAG00000032450	0.0829762
ENSBTAG00000022204	0.15662
TCEAL1	0.041601
USP9X	0.0221601
MORF4L2	0.186194
PLP1	0.0127572
ENSBTAG00000049862	0.037675
RAB9B	-0.00134553
ENSBTAG00000052155	0.0252124
FAM199X	0.0588838
MED14	0.0587433
CXHXorf38	0.0462092
MPC1L	0.0251244
ATP6AP2	0.222721
ESX1	-0.00285931
BCOR	0.0131752
MID1IP1	0.0822326
TSPAN7	-0.0255602
OTC	0.039575
ENSBTAG00000045867	0.00873588
SRPX	0.0560059
ENSBTAG00000055069	0.0110287
SYTL5	0.0179501
RADX	0.123132
RNF128	0.170855
TBC1D8B	0.00681444
ENSBTAG00000005294	0.0449956
CLDN2	0.0112874
ENSBTAG00000045876	0.0738424
DYNLT3	0.155369
RBM41	0.0205843
CYBB	0.0705779
ENSBTAG00000052354	0.0597715
FRMPD3	0.00355658
PRPS1	0.208555
SLC6A14	0.00491625
TSC22D3	0.0564704
MID2	-0.0392683
CT83	0.0135512
PRRG1	-0.0929165
ENSBTAG00000048086	-0.0110307
KLHL13	0.00265487
PSMD10	0.235534
ATG4A	0.07471
WDR44	0.0730443
COL4A6	-0.0749792
DOCK11	-0.0666964
COL4A5	-0.0394929
MAGEB16	0.0104688
IL13RA1	-0.0531805
ENSBTAG00000040406	0.0449425
IRS4	0.0109093
TMEM47	0.0439304
LONRF3	-0.0244398
ENSBTAG00000046820	0.0161064
GUCY2F	-0.00986085
PGRMC1	0.159703
AKAP17B	-0.000771493
ENSBTAG00000049636	-0.0132421
NXT2	0.147463
KCNE5	0.0453142
ACSL4	-0.0791056
SLC25A43	0.1007
SLC25A5	0.356443
STEEP1	0.201452
UBE2A	0.249208
NKRF	0.12117
ENSBTAG00000046838	-0.0225381
TMEM164	0.0392282
SEPTIN6	-0.064282
RPL39	0.304523
AMMECR1	-0.089997
UPF3B	0.200025
CHRDL1	0.0320124
ENSBTAG00000047098	0.0657838
RNF113A	0.193909
NDUFA1	0.303382
NKAP	0.217637
PAK3	0.0240006
CAPN6	0.108593
ZBTB33	0.115753
DCX	-0.0113206
TMEM255A	-0.012278
ENSBTAG00000004586	0.15999
ENSBTAG00000015251	-0.0268752
LAMP2	0.201235
CUL4B	0.0252179
TRPC5	0.0298863
MCTS1	0.220591
C1GALT1C1	0.171913
AMOT	0.112506
ENSBTAG00000038497	0.00219884
CT47B1	0.0141951
ENSBTAG00000016688	0.0197747
ENSBTAG00000055095	0.146362
ENSBTAG00000008248	-0.0180857
IL13RA2	-0.0149747
GRIA3	-0.0563391
THOC2	0.0608301
LRCH2	-0.0108064
XIAP	0.0457685
STAG2	0.0876891
PLS3	-0.0412413
TAB3	0.0779518
ENSBTAG00000048795	-0.00656469
GK	0.00597855
SH2D1A	-0.0179688
TENM1	0.000463686
NR0B1	-0.025184
ENSBTAG00000046796	0.0262234
DACH2	0.00191529
ENSBTAG00000054034	0.0210403
CHM	0.000522421
ENSBTAG00000046941	0.0323594
POF1B	0.121359
ZNF711	-0.0197141
SMARCA1	-0.00793991
APOOL	0.0249394
OCRL	0.0791338
ENSBTAG00000053073	-0.00518624
XPNPEP2	0.167389
ENSBTAG00000026011	0.0707853
SASH3	-0.0183
ZDHHC9	0.258714
POLA1	0.111703
ENSBTAG00000027867	0.00691169
UTP14A	0.264301
PCYT1B	-0.031478
BCORL1	0.0152735
HDX	-0.0209697
PDK3	0.0384167
ELF4	0.0334386
AIFM1	0.268431
RAB33A	0.139885
ZNF280C	-0.00649872
SLC25A14	0.00579717
ENSBTAG00000006383	0.311258
ENSBTAG00000051880	0.038392
ZFX	0.0612692
RBMX2	0.0578656
ENSBTAG00000048581	0.0790454
RPS6KA6	0.0794929
EIF2S3	0.258125
KLHL15	0.147629
CXHXorf58	-0.00233448
ENOX2	-0.00102511
APOO	0.26227
SAT1	0.114417
ACOT9	0.165345
PRDX4	0.253379
IGSF1.1	-0.0154289
PTCHD1	0.0520666
SH3BGRL	-0.149601
HMGN5	0.126192
STK26	0.110075
ENSBTAG00000051240	0.0542855
FRMD7	0.0114623
RAP2C	0.118002
PHEX	0.00194185
BRWD3	0.0519034
ENSBTAG00000052700	0.317123
SMS	0.171497
MBNL3	0.0502374
HS6ST2	-0.00767072
GPC4	-0.0852097
MBTPS2	0.0644901
CNKSR2	0.108593
GPC3	-0.0593624
CCDC160	-0.00116323
PHF6	0.0791372
HPRT1	0.296444
PLAC1	0.0104454
ENSBTAG00000047699	0.0921039
PABIR2	0.0578909
RPS6KA3	-0.0135523
MOSPD1	0.127368
TAF9B	0.043087
PGK1	0.246495
ENSBTAG00000039890	0.14981
ENSBTAG00000052285	-0.00101644
EIF1AX	0.311259
MAP7D2	-0.0101685
ENSBTAG00000019546	0.0474009
ZNF75D	0.143025
ENSBTAG00000050385	0.10206
ZNF75D.1	0.0178631
ATP7A	0.0450932
BCLAF3	0.0608356
COX7B	0.313417
MAGT1	0.220327
ENSBTAG00000053487	0.0145799
ENSBTAG00000049183	0.00695492
ATRX	0.0289346
SH3KBP1	-0.010397
FGF16	-0.0105563
ENSBTAG00000054899	-0.00668684
ENSBTAG00000051706	0.0377281
PBDC1	0.294631
MAGEE2	0.0125135
MAP7D3	-0.0119964
ZDHHC15	-0.0208154
UPRT	0.152331
MAP3K15	0.060251
ARHGEF6	-0.0816184
ABCB7	0.10126
NEXMIF	0.0777429
RLIM	0.174225
SLC16A2	-0.010625
PDHA1	0.243596
ENSBTAG00000051480	0.00745233
CHIC1	0.0296928
ADGRG2	-0.0065776
CDX4	0.0315325
MCF2	0.0152122
PHKA2	0.0220977
PPEF1	-0.00546917
ENSBTAG00000051767	0.106101
PHKA1	0.0311573
CDKL5	0.103025
HDAC8	0.00864166
SCML2	-0.0327666
CITED1	0.17051
ATP11C	0.0801349
SCML1	0.0480908
RPS4X	0.307508
ERCC6L	0.210156
PIN4	0.25345
NHSL2	-0.0665914
RTL5	0.0552369
NHS	-0.139037
OGT	0.0101685
REPS2	0.0428663
RBBP7	0.227092
TXLNG	0.180564
SYAP1	0.206193
ENSBTAG00000006878	0.0422937
MGC148328	0.020127
CTPS2	0.0530357
S100G	-0.0180726
GRPR	-0.00623552
FMR1	0.0781421
AP1S2	0.0699038
ENSBTAG00000020419	0.0481718
CA5B	0.030801
CLTRN	0.00216116
FMR1NB	0.0962044
ACE2	-0.0184869
PIR	0.030675
PIGA	0.0883276
AFF2	-0.0672515
ASB11	0.0456172
ASB9	0.0104817
IDS	0.0279539
TMEM185A	-0.0438096
MOSPD2	0.125163
FANCB	0.0824253
ENSBTAG00000055100	0.0479218
GLRA2	0.00979683
ITGB1BP2	-0.0445258
MTM1	0.0279766
NONO	0.213004
GEMIN8	0.246423
ZMYM3	0.0531216
MTMR1	0.020336
GPM6B	-0.0290188
GJB1	0.159597
ENSBTAG00000052224	0.0112849
CD99L2	0.00845889
NLGN3	-0.00605946
HMGB3	0.260381
OFD1	0.0948519
MED12	0.0978047
VMA21	0.27517
IL2RG	-0.0507577
FOXO4	0.0706731
SNX12	0.161737
TRAPPC2	0.226062
RAB9A	0.179983
TCEANC	0.122942
SLC7A3	0.0584026
GABRE	-0.125927
TEX11	0.00972687
DLG3	0.257585
GABRA3	-0.0348461
TMSB4X	0.117234
GDPD2	0.0796547
KIF4A	0.156
PRPS2	0.120141
PDZD11	0.260622
CETN2	0.196425
NSDHL	0.24966
DGAT2L6	0.0110127
IGBP1	0.177103
ENSBTAG00000054566	0.015216
VAMP7	0.0919837
MSL3	0.147616
TMLHE	0.0514071
EDA	-0.0122086
ENSBTAG00000022278	0.251646
MID1	-0.057493
ENSBTAG00000023978	0.10033
RAB39B	0.0221383
ENSBTAG00000052586	0.0917889
VBP1	0.284685
NALF2	0.0417433
PJA1	0.110454
CLCN4	0.00224438
BRCC3	0.0937131
CMC4	0.129847
MTCP1	0.0130983
FUNDC2	0.318551
EFNB1	0.161134
F8	0.00501882
STARD8	-0.032662
WWC3	0.0949535
ENSBTAG00000033167	0.063583
MPP1	0.292419
YIPF6	0.236167
DKC1	0.325074
GAB3	-0.0619348
ENSBTAG00000055193	0.0144699
CLDN34	0.0160851
ENSBTAG00000020185	0.00948755
SHROOM2	0.154291
GPR143	0.0313078
HAUS7	0.116276
BGN	-0.059281
OPHN1	-0.0465064
TBL1X	0.0253391
CCNQ	0.0834742
DUSP9	-0.00264789
PNCK	0.0361007
ANOS1	-0.00318945
SLC6A8	0.140066
BCAP31	0.293883
AR	0.0004104
PNPLA4	0.093967
ABCD1	0.148573
STS	0.04384
CHST7	-0.147936
PUDP	0.230395
SLC9A7	0.0407703
RP2	0.119871
JADE3	0.0879744
ENSBTAG00000027841	0.0459922
RGN	0.110311
NDUFB11	0.283788
BDA20	0.0287855
RBM10	0.187291
UBA1	0.246122
CDK16	0.146826
USP11	0.128754
PRKX	0.100709
SRPK3	-0.000725065
MXRA5	-0.00258637
ARSH	-0.0198714
ZNF41	-0.0161278
ARSL	0.117745
ARAF	0.0884547
IDH3G	0.269379
ARSD	0.0274528
SSR4	0.319972
SYN1	0.0777408
PDZD4	0.03584
ENSBTAG00000052214	0.0411567
CFP	-0.0475945
ENSBTAG00000038379	0.13638
L1CAM	0.0482383
ELK1	0.0714723
UXT	0.2794
CSNK1B	0.00682507
AVPR2	0
ARHGAP4	-0.0552433
GYG2	0.0330398
XG	-0.0454886
CD99	0.003923
ZNF81	-0.0044948
ZNF182	0.00232694
NAA10	0.300848
RENBP	0.193847
ENSBTAG00000049411	0.0475443
HCFC1	0.0728135
TMEM187	0.0406435
SLC38A5	-0.039671
IRAK1	0.0964397
FTSJ1	0.114331
PORCN	0.0239119
EBP	0.268654
TBC1D25	0.0824612
ENSBTAG00000051063	0.124493
RBM3	0.291103
WDR13	0.0741867
MECP2	0.0271602
TKTL1	0.0601117
FLNA	0.0527723
SUV39H1	0.0927393
HDAC6	0.0745366
EMD	0.247263
ERAS	0.0533277
RPL10	0.271593
PCSK1N	0.0658938
TIMM17B	0.304936
PQBP1	0.226151
DNASE1L1	0.105726
SLC35A2	0.194644
TAFAZZIN	0.137495
PIM2	0.137651
OTUD5	0.122152
KCND1	-0.0145072
GRIPAP1	0.115642
TFE3	0.119047
CCDC120	0.0961054
PRAF2	0.0634872
WDR45	0.0169158
GPKOW	0.171714
ATP6AP1	0.274617
MAGIX	0.163131
PLP2	0.277922
GDI1	0.114145
PRICKLE3	0.176985
FAM50A	0.268891
SYP	0.0269134
PLXNA3	-0.039355
CACNA1F	-0.00214265
LAGE3	0.246879
UBL4A	0.323101
SLC10A3	0.198527
FAM3A	0.149431
G6PD	0.132822
CCDC22	0.20518
ENSBTAG00000053534	0.00196356
IKBKG	0.169627
PPP1R3F	0.0067266
ENSBTAG00000052071	0.0524768
PAGE4	0.140688
USP27X	0.0629099
CLCN5	0.0625055
CCNB3	0.0654759
PABPC5	-0.0331256
DGKK	-0.00131388
ENSBTAG00000033749	-0.0165207
SHROOM4	-0.145823
ENSBTAG00000001911	0.000238626
NUDT10	0.0364626
FAM133A	0.0056131
NUDT11	0.00986619
ENSBTAG00000052977	0.0306649
GSPT2	0.121744
MAGED1	0.15251
MAGED4B	-0.00293421
GPR173	-0.0676595
TSPYL2	0.140954
ENSBTAG00000007493	0.0189857
KDM5C	0.0876706
IQSEC2	-0.0540954
SMC1A	0.244609
RIBC1	0.00112788
HSD17B10	0.293366
HUWE1	0.0932474
PHF8	0.0658106
FAM120C	0.029697
WNK3	0.0255102
TSR2	0.244583
FGD1	-0.023998
RAB21	0.050812
GNL3L	0.166411
MAGED2	-0.00828757
TRO	0.000999419
APEX2	0.151375
ALAS2	-0.0186318
MAGEH1	0.010998
RRAGB	-0.032081
KLF8	-0.0116133
UBQLN2	0.0731807
NBDY	0.0275716
SPIN2	0.0742056
SPIN2B	0.0588302
SPIN2B.1	0
SLC19A3	0.114465
ENSBTAG00000007127	0.0519672
CCL20	-0.052668
SPHKAP	0.0250986
PID1	-0.206789
DNER	-0.0107232
ENSBTAG00000049805	0.0343475
CD24	0.128744
TRIP12	0.0380643
FBXO36	0.0079542
SLC16A14	0.0143182
ENSBTAG00000005584	0.0428343
SP110	-0.0503934
GCA	0.193064
IFIH1	0.0243629
DPP4	-0.0386411
SLC4A10	0.00323237
CAB39	0.0923548
ITM2C	-0.0260956
SPATA3	0.0127495
TBR1	0.0200602
C2H2orf72	0.00318568
PSMD14	0.170263
PSMD1	0.213751
TANK	0.0214035
HTR2B	0.0064995
ARMC9	-0.0228181
B3GNT7	0.0147706
NCL	0.314201
RBMS1	-0.0635025
ENSBTAG00000054546	0.00666899
PTMA	0.271219
PDE6D	0.030646
COPS7B	0.142857
ITGB6	0.106455
NPPC	-0.0677151
PLA2R1	0.111845
DIS3L2	0.0133467
ENSBTAG00000053448	0.0126706
LY75	0.0271473
ENSBTAG00000016748	0.0985776
ENSBTAG00000051665	0.0112199
ENSBTAG00000039346	0.122355
CD302	-0.0928602
MARCHF7	0.0202004
ENSBTAG00000054190	-0.0244458
ECEL1	0.0268641
BAZ2B	-0.0841408
EIF4E2	0.264743
WDSUB1	0.0552367
PHC2	-0.0151346
ENSBTAG00000054666	-0.00589509
ZNF362	-0.0148552
TRIM62	0.0537307
TANC1	-0.0633003
AZIN2	0.0232677
AK2	0.30544
RNF19B	-0.0094716
TMEM54	0.14744
HPCA	0.0774122
FNDC5	0.0169696
DAPL1	-0.00560887
S100PBP	0.100748
PKP4	0.0856628
YARS1	0.231918
KIAA1522	0.153124
SYNC	0.0122286
RBBP4	0.217781
ZBTB8OS	0.152079
CCDC148	0.0605425
ZBTB8A	0.0504073
ZBTB8B	0.0472649
BSDC1	0.108021
ACVR1	0.00158601
TSSK3	0.118135
FAM229A	0.104085
ACVR1C	0.0973416
MARCKSL1	0.248937
HDAC1	0.191855
LCK	0.0588051
FAM167B	-0.0807089
GPD2	0.0723252
MTMR9	-0.0764693
EIF3I	0.297677
TMEM234	0.141229
DCDC2B	0.0128401
IQCC	0.111152
NR4A2	0.154089
CCDC28B	0.103111
KCNJ3	0.00874261
CLDN12	0.180582
ENSBTAG00000051364	-0.0661195
ENSBTAG00000040518	0.187693
PTP4A2	0.2329
GALNT13	-0.00153504
SPOCD1	0.0037466
ADGRB2	-0.0124898
COL16A1	-0.078539
RPRM	-0.0047694
PEF1	0.168122
ENSBTAG00000033143	0.112127
ARL6IP6	0.116411
ENSBTAG00000047365	0.0788395
TINAGL1	0.0940723
ENSBTAG00000039994	-0.00196576
PRPF40A	0.191929
SERINC2	0.300782
FMNL2	0.00999512
FABP3	0.164007
ZCCHC17	0.279396
SNRNP40	0.192182
NKAIN1	0.0969747
STAM2	0.0761174
PUM1	0.0338475
CACNB4	-0.0264728
ARL5A	0.20503
SDC3	-0.0103639
LAPTM5	-0.161185
MATN1	0.000896356
PTPRU	-0.0611469
MECR	0.200524
SRSF4	0.102523
TMEM200B	0.0100534
EPB41	0.0332189
OPRD1	0.0199762
YTHDF2	0.0879292
GMEB1	0.0747345
TAF12	0.199217
RAB42	0.0766133
ENSBTAG00000052614	0.0196449
ENSBTAG00000048228	0.165957
NEB	0.000159517
TRNAU1AP	0.125193
RCC1	0.143543
PHACTR4	-0.00729822
MED18	0.148559
SESN2	0.103825
ATP5IF1	0.289485
DNAJC8	0.243038
PTAFR	-0.0865694
EYA3	0.0658153
XKR8	0.0662255
SMPDL3B	0.0900849
RPA2	0.210062
THEMIS2	-0.0602717
PPP1R8	0.172814
STX12	0.0853557
FAM76A	0.120364
IFI6	-0.072074
FGR	-0.0565434
AHDC1	0.0666232
WASF2	0.0446275
CD164L2	-0.0318408
MAP3K6	-0.0203926
SYTL1	0.0255576
TMEM222	0.165695
WDTC1	-0.00098026
SLC9A1	0.0783155
TENT5B	0.160459
TRNP1	0.0234594
KDF1	0.103474
NUDC	0.281957
GPATCH3	0.0815983
GPN2	0.17881
SFN	0.362842
ZDHHC18	0.116581
PIGV	0.136281
ARID1A	0.0805292
RPS6KA1	0.0643865
DHDDS	0.129996
ENSBTAG00000049812	0.198431
LIN28A	0.135415
CRYBG2	0.13907
UBXN11	0.0953227
SH3BGRL3	0.242098
CEP85	0.0158413
CATSPER4	0.017206
CNKSR1	0.130707
ZNF593	0.34415
FAM110D	-0.0339805
PDIK1L	0.090078
TRIM63	0.0799627
SLC30A2	0.126329
EXTL1	0.0236528
PAFAH2	0.081238
STMN1	0.137767
PAQR7	-0.014293
AUNIP	0.142095
MTFR1L	0.0943452
SELENON	0.0298529
MAN1C1	-0.106393
LDLRAP1	0.0747288
MACO1	0.0810343
ENSBTAG00000001297	-0.0480954
TMEM50A	0.0920785
RSRP1	0.095435
SYF2	0.305061
RUNX3	-0.0315202
CLIC4	-0.0359635
SRRM1	0.180667
NCMAP	0.0265288
RCAN3	0.0751352
NIPAL3	0.112061
STPG1	0.0468805
GRHL3	0.163323
IFNLR1	0.0337567
MYOM3	0.00666295
SRSF10	0.19552
PNRC2	0.216231
CNR2	0.0629271
FUCA1	0.223782
HMGCL	0.193676
GALE	0.129624
LYPLA2	0.217348
PITHD1	0.27241
ELOA	0.170279
RPL11	0.25964
ID3	0.152526
E2F2	0.0561048
ASAP3	0.11983
TCEA3	0.079902
ZNF436	0.00854431
HNRNPR	0.164394
LUZP1	0.0820375
KDM1A	0.21481
EPHB2	0.0327265
ZBTB40	0.0643939
WNT4	0.0897601
CDC42	0.130879
ENSBTAG00000040602	0.289795
CELA3B	0.035436
ENSBTAG00000030269	-0.00216089
HSPG2	0.0113106
USP48	0.161321
RAP1GAP	0.092618
ALPL	0.00227884
ECE1	-0.0319192
LGSN	-0.0147942
EIF4G3	-0.130805
OCA2	0.0346413
HERC2	0.0529879
NIPA1	-0.0166656
HP1BP3	0.0666672
NIPA2	0.0917864
SH2D5	0.00229192
ENSBTAG00000050449	-0.00144766
KIF17	-0.0093744
CYFIP1	0.0636726
DDOST	0.265121
TUBGCP5	0.0627538
PINK1	0.129702
CDA	-0.0642798
FAM43B	0.0109251
MUL1	0.150434
CAMK2N1	0.0285319
CCDC115	0.24381
IMP4	0.298011
PTPN18	0.132748
ENSBTAG00000020499	0.0109541
PLA2G2D1	0.00718993
ARHGEF4	-0.0272014
FAM168B	0.124335
PLEKHB2	0.103095
PLA2G2A	0.00163047
OTUD3	0.146215
RNF186	0.0124133
TMCO4	0.0820982
NBL1	-0.0212033
MICOS10	0.199799
CAPZB	0.110756
SLC66A1	0.225212
HS6ST1	-0.0393407
AKR7A2	0.256711
ENSBTAG00000026758	0.0611419
UGGT1	0.122364
MRTO4	0.330085
EMC1	0.0697744
ENSBTAG00000050981	0.106255
SAP130	0.0577827
AMMECR1L	0.10567
POLR2D	0.238934
WDR33	0.0353733
SFT2D3	0.0520254
ENSBTAG00000050571	0.00808795
LIMS2	-0.0613011
MYO7B	-0.00419091
IWS1	0.168634
PROC	0.0728048
MAP3K2	0.00782737
ERCC3	0.116941
CYP27C1	0.0357812
BIN1	0.117952
UBR4	0.0835372
NAB1	0.0996924
IFFO2	0.00955902
NEMP2	0.0514732
ALDH4A1	0.171878
MFSD6	0.11427
INPP1	0.0372822
RIF1	0.105169
TNFAIP6	-0.023881
HIBCH	0.119318
PAX7	0.018474
C2H2orf88	0.0408973
NMI	-0.00795742
RBM43	-0.095169
IGSF21	0.00597448
RND3	0.0327957
ARHGEF10L	0.00886794
MMADHC	0.239693
PMS1	0.0939726
ORMDL1	0.121886
RCC2	0.125449
OSGEPL1	0.0929343
PADI6	-0.013223
LYPD6	0.178385
ASNSD1	0.199108
SLC40A1	0.0489868
PADI2	0.0527987
LYPD6B	0.0805752
WDR75	0.201163
SDHB	0.210352
ATP13A2	0.0279096
MFAP2	0.0069237
KIF5C	0.0952163
CROCC	0.00450794
NECAP2	0.144106
SPATA21	-0.00781798
EPC2	-0.00366451
COL5A2	-0.139766
SZRD1	0.165718
ENSBTAG00000051080	0.22065
ENSBTAG00000052646	0.048968
MBD5	-0.0493811
FBXO42	0.0586221
PTMA.1	0.242449
CPLANE2	0.0512676
ARHGEF19	0.00552571
EPHA2	0.0665767
FAM131C	0.0568366
ENSBTAG00000034674	0.000933399
SRARP	0.0354341
ENSBTAG00000048513	0.0163663
ORC4	0.0481889
ACVR2A	0.0578811
ENSBTAG00000054108	0.0301493
ZEB2	-0.198954
GTDC1	-0.0343352
ENSBTAG00000050589	-0.0154369
GULP1	-0.0328707
TFPI	-0.0155278
ARHGAP15	-0.0972184
KYNU	-0.0623379
ZSWIM2	0.0221295
FAM171B	-0.0228702
ITGAV	0.0142154
ZC3H15	0.285563
ENSBTAG00000049344	0.0285732
FSIP2	-0.00715481
LRP1B	-0.00529179
NUP35	0.0998455
DUSP19	0.0463354
NCKAP1	0.0111123
NXPH2	-0.0485335
SPOPL	0.0360143
ENSBTAG00000001627	0.021173
HNMT	-0.0553272
THSD7B	0.0266561
CXCR4	-0.0145357
DARS1	0.120075
MCM6	0.178231
LCT	0.0325238
UBXN4	0.186536
R3HDM1	0.0617319
ZRANB3	0.0686713
ENSBTAG00000050570	0.00868364
RAB3GAP1	0.0463862
CCNT2	0.0659065
TMEM163	-0.0349966
FRZB	0.0292318
DNAJC10	0.192909
MGAT5	0.0514213
PDE1A	-0.141436
ENSBTAG00000050322	0.0982421
PPP1R1C	0.0484769
NCKAP5	0.066522
ITPRID2	0.0180578
LYPD1	0.0942542
GPR39	-0.0230745
CERKL	-0.0106254
SLC35F5	0.139885
ACTR3	0.180412
UBE2E3	0.163792
CWC22	0.106481
ZNF385B	-0.0576697
DPP10	-0.00960664
SESTD1	-0.0180236
ENSBTAG00000015077	0.246452
CCDC141	-0.0847344
CCDC93	0.13009
ENSBTAG00000053626	0.0402252
INSIG2	0.0845313
C1QL2	0.0251685
STEAP3	0.0206503
C2H2orf76	0.0954904
DBI	0.291278
TMEM37	-0.0472373
SCTR	0.0286553
ENSBTAG00000052348	0.0312936
ENSBTAG00000054356	0.000792033
CFAP221	-0.00159055
TMEM177	0.179299
PTPN4	0.153774
EPB41L5	0.194555
PLEKHA3	0.111477
FKBP7	0.0364347
TMEM185B	0.186747
PJVK	0.0575899
RALB	0.0982486
PRKRA	0.104951
INHBB	0.0145815
ENSBTAG00000051422	0.0197113
GLI2	0.0232047
OSBPL6	0.0336447
TFCP2L1	0.145162
CLASP1	0.0436069
RBM45	0.144448
CYCT	0.0237295
NIFK	0.345441
PDE11A	-0.0517104
TTC30A	0.0199772
TSN	0.269726
TTC30B	0.0274406
AGPS	0.0895103
ENSBTAG00000050710	-0.00796094
NFE2L2	0.0989382
HNRNPA3	0.24069
MTX2	0.121479
CNTNAP5	-0.00604757
HOXD3	-0.118083
HOXD4	-0.0620236
HOXD9	0.0144736
ENSBTAG00000049994	0.0290333
LNPK	0.0885386
ENSBTAG00000031711	0.0675044
GYPC	-0.114235
ATP5MC3	0.318141
ATF2	-0.038948
GLS	0.047419
CHN1	-0.134596
ENSBTAG00000051479	0.0452457
STAT1	-0.0192618
WIPF1	-0.0135701
STAT4	-0.032819
GPR155	0.0183624
SCRN3	0.0166863
CIR1	0.163841
MYO1B	0.0918313
ENSBTAG00000052569	0.0135579
OLA1	0.170586
SP3	0.00891975
ENSBTAG00000050579	0.0493497
NABP1	0.13344
CDCA7	0.17195
MAP3K20	0.0100566
TMEFF2	0.00912982
RAPGEF4	-0.192755
ENSBTAG00000009976	0.0371729
SLC39A10	-0.0216043
PDK1	-7.79075e-05
ITGA6	0.0884469
DNAH7	-0.0395885
STK17B	-0.0405497
METAP1D	0.156554
HECW2	-0.102086
HAT1	0.20995
CCDC150	-0.0329358
GTF3C3	0.11899
SLC25A12	0.10102
PGAP1	0.145645
DYNC1I2	0.208068
ANKRD44	-0.00580996
CYBRD1	-0.0492056
DCAF17	0.0596529
METTL8	0.0795723
ENSBTAG00000049842	0.101303
TLK1	0.0635766
GORASP2	0.172227
ENSBTAG00000012171	0.0225478
ERICH2	0.0919658
SF3B1	0.0899233
SP5	0.00430574
COQ10B	0.185647
HSPD1	0.328279
HSPE1	0.350892
MOB4	0.169129
RFTN2	-0.100098
MARS2	0.132401
BOLL	0.0123708
MYO3B	0.0388428
PLCL1	-0.0965522
SATB2	0.219961
ENSBTAG00000031595	0.039401
C2H2orf69	0.0715369
TYW5	0.12938
MAIP1	0.21045
SPATS2L	-0.0399365
KCTD18	0.0746901
SGO2	0.123075
AOX1	-0.0205024
AOX2	0.0164981
BZW1	0.264216
CLK1	0.0221564
UBR3	-0.015013
PPIL3	0.18961
NIF3L1	0.142785
METTL5	0.232942
SSB	0.307539
KLHL23	0.0485117
ORC2	0.0852972
PHOSPHO2	0.211002
CFAP210	-0.0132845
PPIG	0.178508
FASTKD1	0.0648453
HYCC2	0.0789584
NDUFB3	0.261123
CFLAR	0.0161729
KLHL41	0.00857627
BBS5	0.0510352
CASP8	-0.120775
LRP2	0.304503
FLACC1	-0.00474155
TRAK2	0.0465484
STRADB	0.173361
DHRS9	0.156305
C2CD6	0.00964757
TMEM237	0.0651673
SPC25	0.277269
NOSTRIN	-0.106236
MPP4	-0.0019772
CERS6	-0.0880884
ENSBTAG00000053930	-0.050021
STK39	-0.0979461
ENSBTAG00000052016	-0.000369739
ENSBTAG00000026882	0.0538601
ALS2	0.042122
SCN9A	-0.0139729
CDK15	0.0377162
FZD7	0.00122788
SCN1A	0.0119318
KIAA2012	0.0685649
SUMO1	0.0824034
NOP58	0.259659
TTC21B	0.0220976
BMPR2	-0.0703003
FAM117B	0.0640222
GALNT3	0.211355
WDR12	0.236721
CARF	0.00552425
CSRNP3	-0.0421088
ENSBTAG00000019994	0.256113
NBEAL1	0.0444553
SCN2A	-0.0272985
SCN3A	-0.00302265
CYP20A1	0.125655
SLC38A11	0.130208
ABI2	-0.0806508
COBLL1	0.110878
RAPH1	0.00217665
GRB14	0.0434712
FIGN	0.0615741
ENSBTAG00000040367	0.00614698
ENSBTAG00000051630	0.0217896
ENSBTAG00000049320	0.0224875
PARD3B	0.0535946
ENSBTAG00000053833	0.0280303
NRP2	-0.12147
INO80D	0.0678225
ENSBTAG00000055132	0.0135042
NDUFS1	0.181856
EEF1B2	0.315519
CMKLR2	0.0543608
ZDBF2	0.0386039
ADAM23	-0.0708126
DYTN	0.0152687
MDH1B	0.00301127
FASTKD2	0.0952071
CPO	0.0575557
KLF7	-0.110335
CREB1	0.0212857
METTL21A	0.0443055
CCNYL1	0.0286998
FZD5	0.00877904
PLEKHM3	-0.0493039
ENSBTAG00000049856	0.00471366
CRYGD	0.00758918
CRYGB	0.0378713
C2H2orf80	0.012177
IDH1	0.239568
ENSBTAG00000055312	-0.00679307
PIKFYVE	-0.00159834
ENSBTAG00000002180	0.00475092
PTH2R	-0.0526964
MAP2	-0.0602271
UNC80	-0.0163271
RPE	0.190536
KANSL1L	-0.101565
ACADL	-0.0249298
LANCL1	0.085332
CPS1	-0.0054285
ERBB4	-0.0168532
ENSBTAG00000005239	0.103506
IKZF2	0.00102508
ENSBTAG00000018549	-0.0105489
ENSBTAG00000052399	-0.00539156
VWC2L	-0.0137315
BARD1	0.236044
ENSBTAG00000051517	0.0196541
ABCA12	-0.0143919
ATIC	0.293077
FN1	0.0748461
MREG	-0.00946115
TMEM169	0.0917186
PECR	0.046102
XRCC5	0.136325
MARCHF4	-0.0153628
SMARCAL1	0.0491294
RPL37A	0.264584
IGFBP2	0.00117311
IGFBP5	0.108971
TNP1	0.000108118
TNS1	-0.0743323
ARPC2	0.220951
GPBAR1	-0.0367801
AAMP	0.284549
PNKD	0.282211
TMBIM1	0.277885
PNKD.1	-0.0372124
SLC11A1	-0.0891683
CTDSP1	0.0505445
VIL1	-0.00980435
USP37	0.0491183
CNOT9	0.160388
PLCD4	-0.0378454
ZNF142	0.10703
BCS1L	0.284832
RNF25	0.0857619
STK36	-0.0324264
TTLL4	0.0729214
CYP27A1	-0.0630489
WNT6	0.235084
WNT10A	0.00775532
CRYBA2	0.00782263
CFAP65	0.00139095
IHH	0.0985375
NHEJ1	0.0999893
SLC23A3	0.0073034
CNPPD1	0.0576834
RETREG2	0.144174
ZFAND2B	0.11693
ABCB6	0.16977
ATG9A	0.0738541
ANKZF1	0.144972
GLB1L	-0.0241156
STK16	0.261038
TUBA4A	0.135612
TUBA1D	-0.0192692
DNAJB2	0.0287721
PTPRN	0.0409549
RESP18	0.0277897
DNPEP	0.227111
DES	0.122092
SPEG	-0.0469551
GMPPA	0.26622
ASIC4	-0.00864279
CHPF	0.226402
TMEM198	0.0500789
OBSL1	0.0524624
INHA	-0.0352868
STK11IP	0.0348133
SLC4A3	-0.00759453
EPHA4	0.0733652
PAX3	-0.00251229
SGPP2	0.00152154
FARSB	0.274163
MOGAT1	0.259669
ACSL3	0.258821
ENSBTAG00000005315	0.292701
ENSBTAG00000055227	0.00146954
ENSBTAG00000027962	0.027767
AP1S3	0.166318
WDFY1	0.0806451
MRPL44	0.231194
SERPINE2	0.16823
CUL3	0.0927536
DOCK10	-0.13066
NYAP2	-0.0426281
IRS1	-0.00824153
RHBDD1	-0.0224321
COL4A3	-0.014223
MFF	0.119008
TM4SF20	-0.0195279
AGFG1	0.0589119
DMRTA2	0.0339154
VANGL2	0.000769694
ELAVL4	0.0114911
NCSTN	0.171637
ENSBTAG00000054981	0.197974
BEND5	0.0459047
COPA	0.136295
ENSBTAG00000012722	0.00289274
SPATA6	-0.0374043
SLC5A9	-0.0242815
PEX19	0.269289
DCAF8	0.131742
TRABD2B	0.0227958
PEA15	0.00703165
CMPK1	0.228558
CASQ1	-0.00932947
STIL	0.111194
PDZK1IP1	-0.0271743
TMIGD3	-0.0493826
CYP4X1	-0.00508825
C3H1orf162	-0.0206076
ATP5PB	0.250916
CYP4A22	-0.0811147
WDR77	0.270418
OVGP1	0.0055898
EFCAB14	0.142796
ATPAF1	0.165337
MOB3C	0.0308362
MKNK1	0.0828796
DMBX1	0.0418832
IGSF8	-0.0172965
CHIA	0.00416505
KCNJ10	0.0302152
PIGM	0.121482
CHI3L2	4.93914e-05
IGSF9	0.00716366
DENND2D	0.233672
TAGLN2	0.204294
FAAH	0.12386
CFAP45	-0.00870368
VSIG8	-0.0202926
NSUN4	0.112279
DUSP23	0.0822686
CEPT1	0.167736
UQCRH	0.30206
ENSBTAG00000050534	0.0205251
LRRC41	0.13577
DRAM2	0.106287
LRIF1	0.104515
RAD54L	0.0987735
POMGNT1	0.162958
LURAP1	-0.00547178
TSPAN1	0.277088
CYM	0.00498859
PIK3R3	-0.208612
ACKR1	-0.106405
CADM3	-0.0399852
ENSBTAG00000011511	-0.151028
LAMTOR5	0.299213
SLC16A4	0.00462601
MAST2	0.0977936
RBM15	0.0372346
KCNC4	0.149283
SLC6A17	-0.0394703
IPP	0.0178145
ENSBTAG00000051822	0.00100045
TMEM69	0.00951557
ALX3	-0.0114054
STRIP1	0.123149
GPBP1L1	0.0605093
SPTA1	-0.0685683
CCDC17	-0.00185161
ENSBTAG00000026848	0.0201897
NASP	0.245757
AHCYL1	0.146122
AKR1A1	0.223203
CSF1	-0.138822
PRDX1	0.3323
EPS8L3	-0.00683956
MMACHC	0.194929
GSTM3	-0.0152072
ENSBTAG00000038502	0.0984998
ENSBTAG00000017029	0.0756122
GSTM1	0.112183
TESK2	0.143542
TOE1	0.138352
MUTYH	0.0449256
ENSBTAG00000012692	0.011815
GSTM1.1	0.0441449
HPDL	0.219078
ENSBTAG00000040435	0.0667644
ZSWIM5	0.00284654
AMPD2	0.0856057
ENSBTAG00000024960	-0.0459238
UROD	0.199312
GNAT2	0.00849073
HECTD3	0.195224
GNAI3	0.1702
KIRREL1	-0.069617
AMIGO1	0.0396707
CYB561D1	0.123387
ATXN7L2	0.0432524
EIF2B3	0.179673
FCRL1	0.0496882
SYPL2	0.002881
PSMA5	0.292478
FCRL3	-0.00787305
PTCH2	0.097722
ENSBTAG00000053098	0.0226187
BTBD19	0.0530342
SORT1	0.0558081
PLK3	0.0422071
MYBPHL	0.000908458
PSRC1	0.127541
RPS8	0.2651
KIF2C	0.230968
CELSR2	0.0049073
ARMH1	0.0294648
TMEM53	0.0666102
SARS1	0.207915
[truncated: 17,402 more rows]

## Sheet: S4
Human_pLI_one2one
Human_ID	Human_gene	Cow_gene	Mouse_gene	Macaca_gene	pLI_perc
ENSG00000036549	ZZZ3	ZZZ3	Zzz3	ZZZ3	4.5
ENSG00000159840	ZYX	ZYX	Zyx	ZYX	78.7
ENSG00000070476	ZXDC	ZXDC	Zxdc	ZXDC	65.5
ENSG00000174442	ZWILCH	ZWILCH	Zwilch	ZWILCH	78.5
ENSG00000086827	ZW10	ZW10	Zw10	ZW10	47.3
ENSG00000153975	ZUP1	ZUP1	Zup1	ZUP1	81.1
ENSG00000214655	ZSWIM8	ZSWIM8	Zswim8	ZSWIM8	1.1
ENSG00000214941	ZSWIM7	ZSWIM7	Zswim7	ZSWIM7	43.9
ENSG00000130449	ZSWIM6	ZSWIM6	Zswim6	ZSWIM6	34.8
ENSG00000132003	ZSWIM4	ZSWIM4	Zswim4	ZSWIM4	39.9
ENSG00000132801	ZSWIM3	ZSWIM3	Zswim3	ZSWIM3	63.3
ENSG00000163012	ZSWIM2	ZSWIM2	Zswim2	ZSWIM2	91.7
ENSG00000168612	ZSWIM1	ZSWIM1	Zswim1	ZSWIM1	72.4
ENSG00000140265	ZSCAN29	ZSCAN29	Zscan29	ZSCAN29	81
ENSG00000197037	ZSCAN25	ZSCAN25	Zscan25	ZSCAN25	38.3
ENSG00000121903	ZSCAN20	ZSCAN20	Zscan20	ZSCAN20	44.9
ENSG00000176371	ZSCAN2	ZSCAN2	Zscan2	ZSCAN2	52.2
ENSG00000158691	ZSCAN12	ZSCAN12	Zscan12	ZSCAN12	77.1
ENSG00000121988	ZRANB3	ZRANB3	Zranb3	ZRANB3	96.8
ENSG00000019995	ZRANB1	ZRANB1	Zranb1	ZRANB1	4.2
ENSG00000170044	ZPLD1	ZPLD1	Zpld1	ZPLD1	68.5
ENSG00000186075	ZPBP2	ZPBP2	Zpbp2	ZPBP2	64.8
ENSG00000042813	ZPBP	ZPBP	Zpbp	ZPBP	40.2
ENSG00000103310	ZP2	ZP2	Zp2	ZP2	77.9
ENSG00000105428	ZNRF4	ZNRF4	Znrf4	ZNRF4	36.7
ENSG00000183579	ZNRF3	ZNRF3	Znrf3	ZNRF3	8.1
ENSG00000180233	ZNRF2	ZNRF2	Znrf2	ZNRF2	27.7
ENSG00000186187	ZNRF1	ZNRF1	Znrf1	ZNRF1	23
ENSG00000117174	ZNHIT6	ZNHIT6	Znhit6	ZNHIT6	66.8
ENSG00000106400	ZNHIT1	ZNHIT1	Znhit1	ZNHIT1	67.5
ENSG00000124201	ZNFX1	ZNFX1	Znfx1	ZNFX1	2.8
ENSG00000022976	ZNF839	ZNF839	Zfp839	ZNF839	72.1
ENSG00000124203	ZNF831	ZNF831	Zfp831	ZNF831	89.2
ENSG00000198783	ZNF830	ZNF830	Zfp830	ZNF830	31.5
ENSG00000151612	ZNF827	ZNF827	Zfp827	ZNF827	4
ENSG00000102984	ZNF821	ZNF821	Zfp821	ZNF821	40.2
ENSG00000182348	ZNF804B	ZNF804B	Zfp804b	ZNF804B	96.3
ENSG00000170396	ZNF804A	ZNF804A	Zfp804a	ZNF804A	20.7
ENSG00000048405	ZNF800	ZNF800	Zfp800	ZNF800	7.5
ENSG00000173875	ZNF791	ZNF791	Zfp791	ZNF791	55.7
ENSG00000197362	ZNF786	ZNF786	Zfp786	ZNF786	88.5
ENSG00000196453	ZNF777	ZNF777	Zfp777	ZNF777	7.2
ENSG00000179965	ZNF771	ZNF771	Zfp771	ZNF771	35.8
ENSG00000198146	ZNF770	ZNF770	Zfp770	ZNF770	20.7
ENSG00000065029	ZNF76	ZNF76	Zfp523	ZNF76	97.5
ENSG00000141579	ZNF750	ZNF750	Zfp750	ZNF750	19.2
ENSG00000147180	ZNF711	ZNF711	Zfp711	ZNF711	10.1
ENSG00000164684	ZNF704	ZNF704	Zfp704	ZNF704	12.7
ENSG00000171163	ZNF692	ZNF692	Zfp692	ZNF692	84
ENSG00000164011	ZNF691	ZNF691	Zfp691	ZNF691	32.3
ENSG00000156853	ZNF689	ZNF689	Zfp689	ZNF689	35.2
ENSG00000143373	ZNF687	ZNF687	Zfp687	ZNF687	12.3
ENSG00000198046	ZNF667	ZNF667	Zfp667	ZNF667	70.8
ENSG00000197343	ZNF655	ZNF655	Zfp655	ZNF655	48.6
ENSG00000175105	ZNF654	ZNF654	Zfp654	ZNF654	15
ENSG00000161914	ZNF653	ZNF653	Zfp653	ZNF653	41
ENSG00000198740	ZNF652	ZNF652	Zfp652	ZNF652	12.9
ENSG00000179930	ZNF648	ZNF648	Zfp648	ZNF648	78.5
ENSG00000167395	ZNF646	ZNF646	Zfp646	ZNF646	57.6
ENSG00000122482	ZNF644	ZNF644	Zfp644	ZNF644	7.3
ENSG00000121864	ZNF639	ZNF639	Zfp639	ZNF639	42
ENSG00000075292	ZNF638	ZNF638	Zfp638	ZNF638	3.2
ENSG00000102870	ZNF629	ZNF629	Zfp629	ZNF629	9.3
ENSG00000183309	ZNF623	ZNF623	Zfp623	ZNF623	43.5
ENSG00000173545	ZNF622	ZNF622	Zfp622	ZNF622	43.9
ENSG00000157657	ZNF618	ZNF618	Zfp618	ZNF618	8.5
ENSG00000180357	ZNF609	ZNF609	Zfp609	ZNF609	3.3
ENSG00000168916	ZNF608	ZNF608	Zfp608	ZNF608	3
ENSG00000196458	ZNF605	ZNF605	Zfp605	ZNF605	13.9
ENSG00000167962	ZNF598	ZNF598	Zfp598	ZNF598	38.7
ENSG00000167981	ZNF597	ZNF597	Zfp597	ZNF597	41.4
ENSG00000142684	ZNF593	ZNF593	Zfp593	ZNF593	40.3
ENSG00000166716	ZNF592	ZNF592	Zfp592	ZNF592	14.8
ENSG00000198440	ZNF583	ZNF583	Zfp583	ZNF583	33.4
ENSG00000018869	ZNF582	ZNF582	Gm3854	ZNF582	67.7
ENSG00000213015	ZNF580	ZNF580	Zfp580	ZNF580	29.7
ENSG00000176472	ZNF575	ZNF575	Zfp575	ZNF575	31.2
ENSG00000196437	ZNF569	ZNF569	Zfp74	ZNF569	75
ENSG00000198597	ZNF536	ZNF536	Zfp536	ZNF536	13.5
ENSG00000074657	ZNF532	ZNF532	Zfp532	ZNF532	17.6
ENSG00000167625	ZNF526	ZNF526	Zfp526	ZNF526	45.2
ENSG00000198795	ZNF521	ZNF521	Zfp521	ZNF521	2.8
ENSG00000178163	ZNF518B	ZNF518B	Zfp518b	ZNF518B	27.7
ENSG00000163795	ZNF513	ZNF513	Zfp513	ZNF513	15.5
ENSG00000196700	ZNF512B	ZNF512B	Zfp512b	ZNF512B	5
ENSG00000243943	ZNF512	ZNF512	Zfp512	ZNF512	14.8
ENSG00000168813	ZNF507	ZNF507	Zfp507	ZNF507	18.4
ENSG00000162714	ZNF496	ZNF496	Zkscan17	ZNF496	11.2
ENSG00000142528	ZNF473	ZNF473	Zfp473	ZNF473	22.5
ENSG00000148143	ZNF462	ZNF462	Zfp462	ZNF462	0.6
ENSG00000178187	ZNF454	ZNF454	Zfp454	ZNF454	74.2
ENSG00000124459	ZNF45	ZNF45	Zfp94	ZNF45	71.8
ENSG00000083838	ZNF446	ZNF446	Zfp446	ZNF446	80.3
ENSG00000185219	ZNF445	ZNF445	Zfp445	ZNF445	7.8
ENSG00000183621	ZNF438	ZNF438	Zfp438	ZNF438	74.9
ENSG00000131116	ZNF428	ZNF428	Zfp428	ZNF428	24.1
ENSG00000102935	ZNF423	ZNF423	Zfp423	ZNF423	9.9
ENSG00000197050	ZNF420	ZNF420	Zfp780b	ZNF420	87.5
ENSG00000119725	ZNF410	ZNF410	Zfp410	ZNF410	25.7
ENSG00000175213	ZNF408	ZNF408	Zfp408	ZNF408	78.7
ENSG00000197024	ZNF398	ZNF398	Zfp398	ZNF398	14
ENSG00000186918	ZNF395	ZNF395	Zfp395	ZNF395	21
ENSG00000160908	ZNF394	ZNF394	Zkscan14	ZNF394	47.8
ENSG00000144331	ZNF385B	ZNF385B	Zfp385b	ZNF385B	64.5
ENSG00000161642	ZNF385A	ZNF385A	Zfp385a	ZNF385A	20
ENSG00000126746	ZNF384	ZNF384	Zfp384	ZNF384	15.5
ENSG00000188283	ZNF383	ZNF383	Zfp383	ZNF383	86.7
ENSG00000161298	ZNF382	ZNF382	Zfp382	ZNF382	19.7
ENSG00000165244	ZNF367	ZNF367	Zfp367	ZNF367	21.6
ENSG00000178175	ZNF366	ZNF366	Zfp366	ZNF366	29.8
ENSG00000138311	ZNF365	ZNF365	Zfp365	ZNF365	74.7
ENSG00000160094	ZNF362	ZNF362	Zfp362	ZNF362	16.2
ENSG00000198816	ZNF358	ZNF358	Zfp358	ZNF358	19.2
ENSG00000169981	ZNF35	ZNF35	Zfp105	ZNF35	44.5
ENSG00000113761	ZNF346	ZNF346	Zfp346	ZNF346	22.2
ENSG00000198026	ZNF335	ZNF335	Zfp335	ZNF335	56.9
ENSG00000181894	ZNF329	ZNF329	Zfp329	ZNF329	75.9
ENSG00000162664	ZNF326	ZNF326	Zfp326	ZNF326	12.1
ENSG00000169740	ZNF32	ZNF32	Zfp637	ZNF32	36.3
ENSG00000166188	ZNF319	ZNF319	Zfp319	ZNF319	14
ENSG00000171467	ZNF318	ZNF318	Zfp318	ZNF318	46.6
ENSG00000130803	ZNF317	ZNF317	Zfp317	ZNF317	52.9
ENSG00000170684	ZNF296	ZNF296	Zfp296	ZNF296	12.6
ENSG00000188994	ZNF292	ZNF292	Zfp292	ZNF292	2.9
ENSG00000141040	ZNF287	ZNF287	Zfp287	ZNF287	27.2
ENSG00000162702	ZNF281	ZNF281	Zfp281	ZNF281	14.6
ENSG00000056277	ZNF280C	ZNF280C	Zfp280c	ZNF280C	9.4
ENSG00000198839	ZNF277	ZNF277	Zfp277	ZNF277	96.3
ENSG00000158805	ZNF276	ZNF276	Zfp276	ZNF276	69.1
ENSG00000006194	ZNF263	ZNF263	Zfp263	ZNF263	55.8
ENSG00000196150	ZNF250	ZNF250	Zfp647	ZNF250	45.3
ENSG00000198105	ZNF248	ZNF248	Zfp248	ZNF248	25
ENSG00000172466	ZNF24	ZNF24	Zfp24	ZNF24	8.1
ENSG00000196793	ZNF239	ZNF239	Zfp239	ZNF239	65.2
ENSG00000130856	ZNF236	ZNF236	Zfp236	ZNF236	1.9
ENSG00000171940	ZNF217	ZNF217	Zfp217	ZNF217	8.2
ENSG00000010244	ZNF207	ZNF207	Zfp207	ZNF207	46.5
ENSG00000122386	ZNF205	ZNF205	Zfp13	ZNF205	41
ENSG00000166261	ZNF202	ZNF202	Zfp202	ZNF202	41.2
ENSG00000136870	ZNF189	ZNF189	Zfp189	ZNF189	58.5
ENSG00000147394	ZNF185	ZNF185	Zfp185	ZNF185	91.7
ENSG00000147118	ZNF182	ZNF182	Zfp182	ZNF182	19.7
ENSG00000154957	ZNF18	ZNF18	Zkscan6	ZNF18	69.2
ENSG00000103343	ZNF174	ZNF174	Zfp174	ZNF174	46.7
ENSG00000163848	ZNF148	ZNF148	Zfp148	ZNF148	16
ENSG00000166478	ZNF143	ZNF143	Zfp143	ZNF143	51.2
ENSG00000172262	ZNF131	ZNF131	Zfp131	ZNF131	5.2
ENSG00000164631	ZNF12	ZNF12	Zfp12	ZNF12	28.6
ENSG00000103994	ZNF106	ZNF106	Zfp106	ZNF106	38
ENSG00000101040	ZMYND8	ZMYND8	Zmynd8	ZMYND8	2
ENSG00000141497	ZMYND15	ZMYND15	Zmynd15	ZMYND15	77.1
ENSG00000066185	ZMYND12	ZMYND12	Zmynd12	ZMYND12	64.5
ENSG00000015171	ZMYND11	ZMYND11	Zmynd11	ZMYND11	3.1
ENSG00000004838	ZMYND10	ZMYND10	Zmynd10	ZMYND10	84.2
ENSG00000132950	ZMYM5	ZMYM5	Zmym5	ZMYM5	38.7
ENSG00000146463	ZMYM4	ZMYM4	Zmym4	ZMYM4	1.1
ENSG00000147130	ZMYM3	ZMYM3	Zmym3	ZMYM3	3.1
ENSG00000121741	ZMYM2	ZMYM2	Zmym2	ZMYM2	12.5
ENSG00000084073	ZMPSTE24	ZMPSTE24	Zmpste24	ZMPSTE24	85.9
ENSG00000122515	ZMIZ2	ZMIZ2	Zmiz2	ZMIZ2	4.9
ENSG00000108175	ZMIZ1	ZMIZ1	Zmiz1	ZMIZ1	4.5
ENSG00000165061	ZMAT4	ZMAT4	Zmat4	ZMAT4	51.9
ENSG00000172667	ZMAT3	ZMAT3	Zmat3	ZMAT3	46.3
ENSG00000146007	ZMAT2	ZMAT2	Zmat2	ZMAT2	12.8
ENSG00000198315	ZKSCAN8	ZKSCAN8	Zkscan8	ZKSCAN8	69.4
ENSG00000196652	ZKSCAN5	ZKSCAN5	Zkscan5	ZKSCAN5	66.4
ENSG00000106261	ZKSCAN1	ZKSCAN1	Zkscan1	ZKSCAN1	27.3
ENSG00000174963	ZIC4	ZIC4	Zic4	ZIC4	62.3
ENSG00000156925	ZIC3	ZIC3	Zic3	ZIC3	20.9
ENSG00000152977	ZIC1	ZIC1	Zic1	ZIC1	20.8
ENSG00000174306	ZHX3	ZHX3	Zhx3	ZHX3	34.1
ENSG00000178764	ZHX2	ZHX2	Zhx2	ZHX2	32.5
ENSG00000165156	ZHX1	ZHX1	Zhx1	ZHX1	20.9
ENSG00000197114	ZGPAT	ZGPAT	Zgpat	ZGPAT	75.4
ENSG00000220201	ZGLP1	ZGLP1	Zglp1	ZGLP1	31.8
ENSG00000157077	ZFYVE9	ZFYVE9	Zfyve9	ZFYVE9	15.3
ENSG00000159733	ZFYVE28	ZFYVE28	Zfyve28	ZFYVE28	18.3
ENSG00000155256	ZFYVE27	ZFYVE27	Zfyve27	ZFYVE27	59.4
ENSG00000072121	ZFYVE26	ZFYVE26	Zfyve26	ZFYVE26	94.2
ENSG00000100711	ZFYVE21	ZFYVE21	Zfyve21	ZFYVE21	24.2
ENSG00000166140	ZFYVE19	ZFYVE19	Zfyve19	ZFYVE19	89.3
ENSG00000165861	ZFYVE1	ZFYVE1	Zfyve1	ZFYVE1	14.4
ENSG00000105278	ZFR2	ZFR2	Zfr2	ZFR2	89.5
ENSG00000056097	ZFR	ZFR	Zfr	ZFR	1.4
ENSG00000169946	ZFPM2	ZFPM2	Zfpm2	ZFPM2	3.2
ENSG00000184939	ZFP90	ZFP90	Zfp90	ZFP90	55.4
ENSG00000187815	ZFP69	ZFP69	Zfp69	ZFP69	86.3
ENSG00000020256	ZFP64	ZFP64	Zfp64	ZFP64	57.9
ENSG00000196670	ZFP62	ZFP62	Zfp62	ZFP62	42.3
ENSG00000204644	ZFP57	ZFP57	Zfp57	ZFP57	62.3
ENSG00000179059	ZFP42	ZFP42	Zfp42	ZFP42	58.3
ENSG00000136866	ZFP37	ZFP37	Zfp37	ZFP37	89.8
ENSG00000185650	ZFP36L1	ZFP36L1	Zfp36l1	ZFP36L1	29.8
ENSG00000128016	ZFP36	ZFP36	Zfp36	ZFP36	26.2
ENSG00000120784	ZFP30	ZFP30	Zfp30	ZFP30	86.2
ENSG00000180787	ZFP3	ZFP3	Zfp3	ZFP3	66.5
ENSG00000198939	ZFP2	ZFP2	Zfp2	ZFP2	94.6
ENSG00000142065	ZFP14	ZFP14	Zfp14	ZFP14	70.4
ENSG00000184517	ZFP1	ZFP1	Zfp1	ZFP1	55.3
ENSG00000091656	ZFHX4	ZFHX4	Zfhx4	ZFHX4	1.4
ENSG00000140836	ZFHX3	ZFHX3	Zfhx3	ZFHX3	0.5
ENSG00000133858	ZFC3H1	ZFC3H1	Zfc3h1	ZFC3H1	0.5
ENSG00000066827	ZFAT	ZFAT	Zfat	ZFAT	60.4
ENSG00000086666	ZFAND6	ZFAND6	Zfand6	ZFAND6	38.1
ENSG00000107372	ZFAND5	ZFAND5	Zfand5	ZFAND5	17.1
ENSG00000156639	ZFAND3	ZFAND3	Zfand3	ZFAND3	13.8
ENSG00000158552	ZFAND2B	ZFAND2B	Zfand2b	ZFAND2B	58.1
ENSG00000160445	ZER1	ZER1	Zer1	ZER1	6.2
ENSG00000169554	ZEB2	ZEB2	Zeb2	ZEB2	4.2
ENSG00000148516	ZEB1	ZEB1	Zeb1	ZEB1	11.2
ENSG00000188706	ZDHHC9	ZDHHC9	Zdhhc9	ZDHHC9	18.4
ENSG00000153786	ZDHHC7	ZDHHC7	Zdhhc7	ZDHHC7	58
ENSG00000023041	ZDHHC6	ZDHHC6	Zdhhc6	ZDHHC6	66.1
ENSG00000156599	ZDHHC5	ZDHHC5	Zdhhc5	ZDHHC5	3.6
ENSG00000136247	ZDHHC4	ZDHHC4	Zdhhc4	ZDHHC4	91.7
ENSG00000174165	ZDHHC24	ZDHHC24	Zdhhc24	ZDHHC24	57.1
ENSG00000184307	ZDHHC23	ZDHHC23	Zdhhc23	ZDHHC23	80
ENSG00000177108	ZDHHC22	ZDHHC22	Zdhhc22	ZDHHC22	35.2
ENSG00000175893	ZDHHC21	ZDHHC21	Zdhhc21	ZDHHC21	46.9
ENSG00000180776	ZDHHC20	ZDHHC20	Zdhhc20	ZDHHC20	61.4
ENSG00000104219	ZDHHC2	ZDHHC2	Zdhhc2	ZDHHC2	56.6
ENSG00000186908	ZDHHC17	ZDHHC17	Zdhhc17	ZDHHC17	6.6
ENSG00000171307	ZDHHC16	ZDHHC16	Zdhhc16	ZDHHC16	52.2
ENSG00000102383	ZDHHC15	ZDHHC15	Zdhhc15	ZDHHC15	17.9
ENSG00000175048	ZDHHC14	ZDHHC14	Zdhhc14	ZDHHC14	11.4
ENSG00000177054	ZDHHC13	ZDHHC13	Zdhhc13	ZDHHC13	96.5
ENSG00000160446	ZDHHC12	ZDHHC12	Zdhhc12	ZDHHC12	54.3
ENSG00000159714	ZDHHC1	ZDHHC1	Zdhhc1	ZDHHC1	79.5
ENSG00000204186	ZDBF2	ZDBF2	Zdbf2	ZDBF2	85.7
ENSG00000078487	ZCWPW1	ZCWPW1	Zcwpw1	ZCWPW1	95.2
ENSG00000131732	ZCCHC9	ZCCHC9	Zcchc9	ZCCHC9	56.3
ENSG00000033030	ZCCHC8	ZCCHC8	Zcchc8	ZCCHC8	22.4
ENSG00000147905	ZCCHC7	ZCCHC7	Zcchc7	ZCCHC7	90
ENSG00000168228	ZCCHC4	ZCCHC4	Zcchc4	ZCCHC4	75
ENSG00000165424	ZCCHC24	ZCCHC24	Zcchc24	ZCCHC24	30.7
ENSG00000141664	ZCCHC2	ZCCHC2	Zcchc2	ZCCHC2	35.6
ENSG00000140948	ZCCHC14	ZCCHC14	Zcchc14	ZCCHC14	14.9
ENSG00000187969	ZCCHC13	ZCCHC13	Zcchc13	ZCCHC13	69.7
ENSG00000126970	ZC4H2	ZC4H2	Zc4h2	ZC4H2	20.8
ENSG00000091732	ZC3HC1	ZC3HC1	Zc3hc1	ZC3HC1	67
ENSG00000105939	ZC3HAV1	ZC3HAV1	Zc3hav1	ZC3HAV1	51.2
ENSG00000144161	ZC3H8	ZC3H8	Zc3h8	ZC3H8	31
ENSG00000100403	ZC3H7B	ZC3H7B	Zc3h7b	ZC3H7B	9.8
ENSG00000122299	ZC3H7A	ZC3H7A	Zc3h7a	ZC3H7A	2.7
ENSG00000188177	ZC3H6	ZC3H6	Zc3h6	ZC3H6	15.7
ENSG00000014164	ZC3H3	ZC3H3	Zc3h3	ZC3H3	13.5
ENSG00000158545	ZC3H18	ZC3H18	Zc3h18	ZC3H18	5.2
ENSG00000065548	ZC3H15	ZC3H15	Zc3h15	ZC3H15	15
ENSG00000100722	ZC3H14	ZC3H14	Zc3h14	ZC3H14	4.4
ENSG00000178199	ZC3H12D	ZC3H12D	Zc3h12d	ZC3H12D	23.8
ENSG00000149289	ZC3H12C	ZC3H12C	Zc3h12c	ZC3H12C	6.3
ENSG00000102053	ZC3H12B	ZC3H12B	Zc3h12b	ZC3H12B	12.8
ENSG00000163874	ZC3H12A	ZC3H12A	Zc3h12a	ZC3H12A	17.2
ENSG00000135482	ZC3H10	ZC3H10	Zc3h10	ZC3H10	21.9
ENSG00000119703	ZC2HC1C	ZC2HC1C	Zc2hc1c	ZC2HC1C	81.7
ENSG00000104427	ZC2HC1A	ZC2HC1A	Zc2hc1a	ZC2HC1A	21.3
ENSG00000176261	ZBTB8OS	ZBTB8OS	Zbtb8os	ZBTB8OS	14.3
ENSG00000160062	ZBTB8A	ZBTB8A	Zbtb8a	ZBTB8A	42.8
ENSG00000184828	ZBTB7C	ZBTB7C	Zbtb7c	ZBTB7C	17.5
ENSG00000160685	ZBTB7B	ZBTB7B	Zbtb7b	ZBTB7B	20.4
ENSG00000186130	ZBTB6	ZBTB6	Zbtb6	ZBTB6	34
ENSG00000168795	ZBTB5	ZBTB5	Zbtb5	ZBTB5	21.7
ENSG00000168826	ZBTB49	ZBTB49	Zbtb49	ZBTB49	55.3
ENSG00000204859	ZBTB48	ZBTB48	Zbtb48	ZBTB48	25.2
ENSG00000130584	ZBTB46	ZBTB46	Zbtb46	ZBTB46	21.1
ENSG00000196323	ZBTB44	ZBTB44	Zbtb44	ZBTB44	9.4
ENSG00000169155	ZBTB43	ZBTB43	Zbtb43	ZBTB43	18.8
ENSG00000177888	ZBTB41	ZBTB41	Zbtb41	ZBTB41	22.6
ENSG00000184677	ZBTB40	ZBTB40	Zbtb40	ZBTB40	77.6
ENSG00000174282	ZBTB4	ZBTB4	Zbtb4	ZBTB4	6.6
ENSG00000166860	ZBTB39	ZBTB39	Zbtb39	ZBTB39	55
ENSG00000177311	ZBTB38	ZBTB38	Zbtb38	ZBTB38	11.8
ENSG00000185278	ZBTB37	ZBTB37	Zbtb37	ZBTB37	23.6
ENSG00000177125	ZBTB34	ZBTB34	Zbtb34	ZBTB34	20.6
ENSG00000177485	ZBTB33	ZBTB33	Zbtb33	ZBTB33	18
ENSG00000185670	ZBTB3	ZBTB3	Zbtb3	ZBTB3	37.3
ENSG00000171448	ZBTB26	ZBTB26	Zbtb26	ZBTB26	53
ENSG00000089775	ZBTB25	ZBTB25	Zbtb25	ZBTB25	75
ENSG00000112365	ZBTB24	ZBTB24	Zbtb24	ZBTB24	69.8
ENSG00000236104	ZBTB22	ZBTB22	Zbtb22	ZBTB22	37.5
ENSG00000173276	ZBTB21	ZBTB21	Zbtb21	ZBTB21	10.8
ENSG00000181722	ZBTB20	ZBTB20	Zbtb20	ZBTB20	11.4
ENSG00000181472	ZBTB2	ZBTB2	Zbtb2	ZBTB2	11.8
ENSG00000116809	ZBTB17	ZBTB17	Zbtb17	ZBTB17	6.8
ENSG00000109906	ZBTB16	ZBTB16	Zbtb16	ZBTB16	11.7
ENSG00000198081	ZBTB14	ZBTB14	Zbtb14	ZBTB14	26.7
ENSG00000204366	ZBTB12	ZBTB12	Zbtb12	ZBTB12	21.4
ENSG00000066422	ZBTB11	ZBTB11	Zbtb11	ZBTB11	36.5
ENSG00000205189	ZBTB10	ZBTB10	Zbtb10	ZBTB10	18.5
ENSG00000126804	ZBTB1	ZBTB1	Zbtb1	ZBTB1	12.6
ENSG00000124256	ZBP1	ZBP1	Zbp1	ZBP1	92.8
ENSG00000100426	ZBED4	ZBED4	Zbed4	ZBED4	10
ENSG00000132846	ZBED3	ZBED3	Zbed3	ZBED3	44.5
ENSG00000182223	ZAR1	ZAR1	Zar1	ZAR1	52.6
ENSG00000115085	ZAP70	ZAP70	Zap70	ZAP70	36.4
ENSG00000100811	YY1	YY1	Yy1	YY1	13.2
ENSG00000164924	YWHAZ	YWHAZ	Ywhaz	YWHAZ	21.1
ENSG00000170027	YWHAG	YWHAG	Ywhag	YWHAG	15.7
ENSG00000108953	YWHAE	YWHAE	Ywhae	YWHAE	13.6
ENSG00000166913	YWHAB	YWHAB	Ywhab	YWHAB	15.7
ENSG00000198492	YTHDF2	YTHDF2	Ythdf2	YTHDF2	9.7
ENSG00000149658	YTHDF1	YTHDF1	Ythdf1	YTHDF1	11.1
ENSG00000047188	YTHDC2	YTHDC2	Ythdc2	YTHDC2	1.4
ENSG00000083896	YTHDC1	YTHDC1	Ythdc1	YTHDC1	1.1
ENSG00000196449	YRDC	YRDC	Yrdc	YRDC	41.4
ENSG00000166793	YPEL4	YPEL4	Ypel4	YPEL4	21.4
ENSG00000175155	YPEL2	YPEL2	Ypel2	YPEL2	16.2
ENSG00000100027	YPEL1	YPEL1	Ypel1	YPEL1	37.9
ENSG00000180667	YOD1	YOD1	Yod1	YOD1	28.8
ENSG00000136758	YME1L1	YME1L1	Yme1l1	YME1L1	8.8
ENSG00000119596	YLPM1	YLPM1	Ylpm1	YLPM1	3.4
ENSG00000106636	YKT6	YKT6	Ykt6	YKT6	19.8
ENSG00000104957	YJU2B	YJU2B	Ccdc130	YJU2B	50.5
ENSG00000105248	YJU2	YJU2	Yju2	YJU2	64.9
ENSG00000181704	YIPF6	YIPF6	Yipf6	YIPF6	28.2
ENSG00000145817	YIPF5	YIPF5	Yipf5	YIPF5	16
ENSG00000119820	YIPF4	YIPF4	Yipf4	YIPF4	51.8
ENSG00000137207	YIPF3	YIPF3	Yipf3	YIPF3	21.2
ENSG00000130733	YIPF2	YIPF2	Yipf2	YIPF2	64.3
ENSG00000167645	YIF1B	YIF1B	Yif1b	YIF1B	48.6
ENSG00000174851	YIF1A	YIF1A	Yif1a	YIF1A	90.5
ENSG00000176105	YES1	YES1	Yes1	YES1	47.4
ENSG00000127337	YEATS4	YEATS4	Yeats4	YEATS4	43.2
ENSG00000163872	YEATS2	YEATS2	Yeats2	YEATS2	2.9
ENSG00000060138	YBX3	YBX3	Ybx3	YBX3	56.8
ENSG00000006047	YBX2	YBX2	Ybx2	YBX2	13.1
ENSG00000065978	YBX1	YBX1	Ybx1	YBX1	9.8
ENSG00000139131	YARS2	YARS2	Yars2	YARS2	79
ENSG00000134684	YARS1	YARS1	Yars	YARS1	68.5
ENSG00000137693	YAP1	YAP1	Yap1	YAP1	6.5
ENSG00000015153	YAF2	YAF2	Yaf2	YAF2	20.2
ENSG00000241127	YAE1	YAE1	Yae1d1	YAE1	41.8
ENSG00000015532	XYLT2	XYLT2	Xylt2	XYLT2	34.7
ENSG00000103489	XYLT1	XYLT1	Xylt1	XYLT1	10.9
ENSG00000093217	XYLB	XYLB	Xylb	XYLB	95.8
ENSG00000173950	XXYLT1	XXYLT1	Xxylt1	XXYLT1	46.8
ENSG00000166435	XRRA1	XRRA1	Xrra1	XRRA1	74.3
ENSG00000088930	XRN2	XRN2	Xrn2	XRN2	21.2
ENSG00000114127	XRN1	XRN1	Xrn1	XRN1	8.1
ENSG00000196419	XRCC6	XRCC6	Xrcc6	XRCC6	7.6
ENSG00000079246	XRCC5	XRCC5	Xrcc5	XRCC5	2.4
ENSG00000152422	XRCC4	XRCC4	Xrcc4	XRCC4	63.8
ENSG00000126215	XRCC3	XRCC3	Xrcc3	XRCC3	86.7
ENSG00000196584	XRCC2	XRCC2	Xrcc2	XRCC2	79.8
ENSG00000073050	XRCC1	XRCC1	Xrcc1	XRCC1	85.7
ENSG00000143324	XPR1	XPR1	Xpr1	XPR1	6.8
ENSG00000184575	XPOT	XPOT	Xpot	XPOT	7
ENSG00000130227	XPO7	XPO7	Xpo7	XPO7	1.6
ENSG00000169180	XPO6	XPO6	Xpo6	XPO6	1.5
ENSG00000124571	XPO5	XPO5	Xpo5	XPO5	1.6
ENSG00000132953	XPO4	XPO4	Xpo4	XPO4	1.4
ENSG00000082898	XPO1	XPO1	Xpo1	XPO1	1.4
ENSG00000196236	XPNPEP3	XPNPEP3	Xpnpep3	XPNPEP3	78.4
ENSG00000122121	XPNPEP2	XPNPEP2	Xpnpep2	XPNPEP2	81.6
ENSG00000108039	XPNPEP1	XPNPEP1	Xpnpep1	XPNPEP1	13.6
ENSG00000154767	XPC	XPC	Xpc	XPC	92.8
ENSG00000136936	XPA	XPA	Xpa	XPA	73.3
ENSG00000182489	XKRX	XKRX	Xkrx	XKRX	68.7
ENSG00000221947	XKR9	XKR9	Xkr9	XKR9	87.4
ENSG00000158156	XKR8	XKR8	Xkr8	XKR8	77.2
ENSG00000260903	XKR7	XKR7	Xkr7	XKR7	16.4
ENSG00000206579	XKR4	XKR4	Xkr4	XKR4	12.1
ENSG00000163092	XIRP2	XIRP2	Xirp2	XIRP2	99.9
ENSG00000168334	XIRP1	XIRP1	Xirp1	XIRP1	97.9
ENSG00000158125	XDH	XDH	Xdh	XDH	95.9
ENSG00000173578	XCR1	XCR1	Xcr1	XCR1	43.3
ENSG00000132530	XAF1	XAF1	Xaf1	XAF1	88.1
ENSG00000076924	XAB2	XAB2	Xab2	XAB2	7.5
ENSG00000018408	WWTR1	WWTR1	Wwtr1	WWTR1	16.8
ENSG00000198373	WWP2	WWP2	Wwp2	WWP2	12.1
ENSG00000123124	WWP1	WWP1	Wwp1	WWP1	14.2
ENSG00000186153	WWOX	WWOX	Wwox	WWOX	88.2
ENSG00000151718	WWC2	WWC2	Wwc2	WWC2	75.7
ENSG00000113645	WWC1	WWC1	Wwc1	WWC1	52.1
ENSG00000075035	WSCD2	WSCD2	Wscd2	WSCD2	30.1
ENSG00000179314	WSCD1	WSCD1	Wscd1	WSCD1	80.6
ENSG00000109046	WSB1	WSB1	Wsb1	WSB1	16.5
ENSG00000124535	WRNIP1	WRNIP1	Wrnip1	WRNIP1	26.4
ENSG00000165392	WRN	WRN	Wrn	WRN	97.6
ENSG00000116213	WRAP73	WRAP73	Wrap73	WRAP73	50.2
ENSG00000141499	WRAP53	WRAP53	Wrap53	WRAP53	27
ENSG00000158955	WNT9B	WNT9B	Wnt9b	WNT9B	46.8
ENSG00000143816	WNT9A	WNT9A	Wnt9a	WNT9A	25.1
ENSG00000075290	WNT8B	WNT8B	Wnt8b	WNT8B	30.4
ENSG00000061492	WNT8A	WNT8A	Wnt8a	WNT8A	18.8
ENSG00000188064	WNT7B	WNT7B	Wnt7b	WNT7B	67.8
ENSG00000154764	WNT7A	WNT7A	Wnt7a	WNT7A	31.7
ENSG00000114251	WNT5A	WNT5A	Wnt5a	WNT5A	12.4
ENSG00000162552	WNT4	WNT4	Wnt4	WNT4	40.4
ENSG00000154342	WNT3A	WNT3A	Wnt3a	WNT3A	22.4
ENSG00000108379	WNT3	WNT3	Wnt3	WNT3	15.2
ENSG00000134245	WNT2B	WNT2B	Wnt2b	WNT2B	36.1
ENSG00000105989	WNT2	WNT2	Wnt2	WNT2	27.2
ENSG00000002745	WNT16	WNT16	Wnt16	WNT16	70.1
ENSG00000085741	WNT11	WNT11	Wnt11	WNT11	42.2
ENSG00000169884	WNT10B	WNT10B	Wnt10b	WNT10B	59.1
ENSG00000135925	WNT10A	WNT10A	Wnt10a	WNT10A	54.9
ENSG00000125084	WNT1	WNT1	Wnt1	WNT1	43
ENSG00000196632	WNK3	WNK3	Wnk3	WNK3	1.9
ENSG00000060237	WNK1	WNK1	Wnk1	WNK1	0.5
ENSG00000116729	WLS	WLS	Wls	WLS	34.4
ENSG00000011451	WIZ	WIZ	Wiz	WIZ	6
ENSG00000157954	WIPI2	WIPI2	Wipi2	WIPI2	43.5
ENSG00000070540	WIPI1	WIPI1	Wipi1	WIPI1	29.3
ENSG00000122574	WIPF3	WIPF3	Wipf3	WIPF3	68.7
ENSG00000171475	WIPF2	WIPF2	Wipf2	WIPF2	33.7
ENSG00000156076	WIF1	WIF1	Wif1	WIF1	75.7
ENSG00000156232	WHAMM	WHAMM	Whamm	WHAMM	78
ENSG00000173714	WFIKKN2	WFIKKN2	Wfikkn2	WFIKKN2	50.4
ENSG00000158901	WFDC8	WFDC8	Wfdc8	WFDC8	79.6
ENSG00000175121	WFDC5	WFDC5	Wfdc5	WFDC5	73.6
ENSG00000124116	WFDC3	WFDC3	Wfdc3	WFDC3	51.9
ENSG00000180083	WFDC11	WFDC11	Wfdc11	WFDC11	59.9
ENSG00000180305	WFDC10A	WFDC10A	Wfdc10	WFDC10A	36.4
ENSG00000103175	WFDC1	WFDC1	Wfdc1	WFDC1	80.6
ENSG00000214102	WEE2	WEE2	Wee2	WEE2	64.8
ENSG00000166483	WEE1	WEE1	Wee1	WEE1	7.5
ENSG00000142784	WDTC1	WDTC1	Wdtc1	WDTC1	5.5
ENSG00000196151	WDSUB1	WDSUB1	Wdsub1	WDSUB1	82.1
ENSG00000105875	WDR91	WDR91	Wdr91	WDR91	63.3
ENSG00000140006	WDR89	WDR89	Wdr89	WDR89	69.8
ENSG00000187260	WDR86	WDR86	Wdr86	WDR86	93.6
ENSG00000164091	WDR82	WDR82	Wdr82	WDR82	16.5
ENSG00000116455	WDR77	WDR77	Wdr77	WDR77	52.9
ENSG00000092470	WDR76	WDR76	Wdr76	WDR76	61.4
ENSG00000115368	WDR75	WDR75	Wdr75	WDR75	28.3
ENSG00000177082	WDR73	WDR73	Wdr73	WDR73	78.7
ENSG00000166415	WDR72	WDR72	Wdr72	WDR72	97.6
ENSG00000082068	WDR70	WDR70	Wdr70	WDR70	21.6
ENSG00000091157	WDR7	WDR7	Wdr7	WDR7	0.9
ENSG00000162843	WDR64	WDR64	Wdr64	WDR64	96.9
ENSG00000178252	WDR6	WDR6	Wdr6	WDR6	82.6
ENSG00000103091	WDR59	WDR59	Wdr59	WDR59	93.6
ENSG00000120314	WDR55	WDR55	Wdr55	WDR55	81.9
ENSG00000005448	WDR54	WDR54	Wdr54	WDR54	80.9
ENSG00000185798	WDR53	WDR53	Wdr53	WDR53	68.3
ENSG00000196363	WDR5	WDR5	Wdr5	WDR5	6.3
ENSG00000174776	WDR49	WDR49	Wdr49	WDR49	95
ENSG00000114742	WDR48	WDR48	Wdr48	WDR48	4.3
ENSG00000085433	WDR47	WDR47	Wdr47	WDR47	17.6
ENSG00000227057	WDR46	WDR46	Wdr46	WDR46	78.5
ENSG00000141580	WDR45B	WDR45B	Wdr45b	WDR45B	26.4
ENSG00000131725	WDR44	WDR44	Wdr44	WDR44	4.2
ENSG00000163811	WDR43	WDR43	Wdr43	WDR43	6
ENSG00000164253	WDR41	WDR41	Wdr41	WDR41	80.8
ENSG00000160193	WDR4	WDR4	Wdr4	WDR4	79.4
ENSG00000136918	WDR38	WDR38	Wdr38	WDR38	68.2
ENSG00000047056	WDR37	WDR37	Wdr37	WDR37	7.7
ENSG00000118965	WDR35	WDR35	Wdr35	WDR35	97.6
ENSG00000136709	WDR33	WDR33	Wdr33	WDR33	2
ENSG00000148225	WDR31	WDR31	Wdr31	WDR31	79.3
ENSG00000065183	WDR3	WDR3	Wdr3	WDR3	84.5
ENSG00000184465	WDR27	WDR27	Wdr27	WDR27	97.1
ENSG00000162923	WDR26	WDR26	Wdr26	WDR26	4.7
ENSG00000176473	WDR25	WDR25	Wdr25	WDR25	48
ENSG00000127580	WDR24	WDR24	Wdr24	WDR24	58.4
ENSG00000157796	WDR19	WDR19	Wdr19	WDR19	85.4
ENSG00000150627	WDR17	WDR17	Wdr17	WDR17	97.4
ENSG00000101940	WDR13	WDR13	Wdr13	WDR13	15.5
ENSG00000138442	WDR12	WDR12	Wdr12	WDR12	27.2
ENSG00000120008	WDR11	WDR11	Wdr11	WDR11	45
ENSG00000071127	WDR1	WDR1	Wdr1	WDR1	8.6
ENSG00000143951	WDPCP	WDPCP	Wdpcp	WDPCP	90.4
ENSG00000198554	WDHD1	WDHD1	Wdhd1	WDHD1	94
ENSG00000163625	WDFY3	WDFY3	Wdfy3	WDFY3	0.1
ENSG00000139668	WDFY2	WDFY2	Wdfy2	WDFY2	59.6
ENSG00000120688	WBP4	WBP4	Wbp4	WBP4	67.1
ENSG00000183066	WBP2NL	WBP2NL	Wbp2nl	WBP2NL	90.5
ENSG00000132471	WBP2	WBP2	Wbp2	WBP2	43.8
ENSG00000239779	WBP1	WBP1	Wbp1	WBP1	68.6
ENSG00000106299	WASL	WASL	Wasl	WASL	13.8
ENSG00000164961	WASHC5	WASHC5	Washc5	WASHC5	95.6
ENSG00000136051	WASHC4	WASHC4	Washc4	WASHC4	40.3
ENSG00000120860	WASHC3	WASHC3	Washc3	WASHC3	48.9
ENSG00000132970	WASF3	WASF3	Wasf3	WASF3	13.9
ENSG00000158195	WASF2	WASF2	Wasf2	WASF2	12.4
ENSG00000112290	WASF1	WASF1	Wasf1	WASF1	17
ENSG00000015285	WAS	WAS	Was	WAS	9.7
ENSG00000116874	WARS2	WARS2	Wars2	WARS2	27.4
ENSG00000140105	WARS1	WARS1	Wars	WARS1	8.5
ENSG00000095787	WAC	WAC	Wac	WAC	3.8
ENSG00000110799	VWF	VWF	Vwf	VWF	94.1
ENSG00000174453	VWC2L	VWC2L	Vwc2l	VWC2L	27.1
ENSG00000188730	VWC2	VWC2	Vwc2	VWC2	21.8
ENSG00000102763	VWA8	VWA8	Vwa8	VWA8	99.9
ENSG00000204396	VWA7	VWA7	Vwa7	VWA7	84
ENSG00000145198	VWA5B2	VWA5B2	Vwa5b2	VWA5B2	34
ENSG00000168658	VWA3B	VWA3B	Vwa3b	VWA3B	98.2
ENSG00000175267	VWA3A	VWA3A	Vwa3a	VWA3A	98.8
ENSG00000165816	VWA2	VWA2	Vwa2	VWA2	95.8
ENSG00000151532	VTI1A	VTI1A	Vti1a	VTI1A	32.4
ENSG00000134258	VTCN1	VTCN1	Vtcn1	VTCN1	89.3
ENSG00000009844	VTA1	VTA1	Vta1	VTA1	44.3
ENSG00000119614	VSX2	VSX2	Vsx2	VSX2	42.3
ENSG00000100987	VSX1	VSX1	Vsx1	VSX1	56.8
ENSG00000165633	VSTM4	VSTM4	Vstm4	VSTM4	40.4
ENSG00000132821	VSTM2L	VSTM2L	Vstm2l	VSTM2L	33.9
ENSG00000170419	VSTM2A	VSTM2A	Vstm2a	VSTM2A	42.7
ENSG00000163032	VSNL1	VSNL1	Vsnl1	VSNL1	23.3
ENSG00000107738	VSIR	VSIR	Vsir	VSIR	33.1
ENSG00000243284	VSIG8	VSIG8	Vsig8	VSIG8	60.1
ENSG00000155659	VSIG4	VSIG4	Vsig4	VSIG4	71.5
ENSG00000019102	VSIG2	VSIG2	Vsig2	VSIG2	70.4
ENSG00000176834	VSIG10	WSB2	Vsig10	VSIG10	83.6
ENSG00000101842	VSIG1	VSIG1	Vsig1	VSIG1	57.5
ENSG00000133980	VRTN	VRTN	Vrtn	VRTN	19.6
ENSG00000105053	VRK3	VRK3	Vrk3	VRK3	81.8
ENSG00000028116	VRK2	VRK2	Vrk2	VRK2	88.7
ENSG00000100749	VRK1	VRK1	Vrk1	VRK1	47.9
ENSG00000075399	VPS9D1	VPS9D1	Vps9d1	VPS9D1	62.4
ENSG00000143952	VPS54	VPS54	Vps54	VPS54	14.8
ENSG00000141252	VPS53	VPS53	Vps53	VPS53	73.9
ENSG00000119541	VPS4B	VPS4B	Vps4b	VPS4B	38.3
ENSG00000136631	VPS45	VPS45	Vps45	VPS45	68.6
ENSG00000006715	VPS41	VPS41	Vps41	VPS41	88.8
ENSG00000166887	VPS39	VPS39	Vps39	VPS39	65.8
ENSG00000176428	VPS37D	VPS37D	Vps37d	VPS37D	25.9
ENSG00000139722	VPS37B	VPS37B	Vps37b	VPS37B	25.3
ENSG00000155975	VPS37A	VPS37A	Vps37a	VPS37A	29
ENSG00000136100	VPS36	VPS36	Vps36	VPS36	43.1
ENSG00000103544	VPS35L	VPS35L	Vps35l	VPS35L	77.4
ENSG00000069329	VPS35	VPS35	Vps35	VPS35	9
ENSG00000111237	VPS29	VPS29	Vps29	VPS29	15.9
ENSG00000157538	VPS26C	VPS26C	Vps26c	VPS26C	29.8
ENSG00000151502	VPS26B	VPS26B	Vps26b	VPS26B	12.9
ENSG00000122958	VPS26A	VPS26A	Vps26a	VPS26A	25.7
ENSG00000131475	VPS25	VPS25	Vps25	VPS25	23.6
ENSG00000104142	VPS18	VPS18	Vps18	VPS18	15.6
ENSG00000215305	VPS16	VPS16	Vps16	VPS16	75.9
ENSG00000048707	VPS13D	VPS13D	Vps13d	VPS13D	2.4
ENSG00000129003	VPS13C	VPS13C	Vps13c	VPS13C	99.9
ENSG00000132549	VPS13B	VPS13B	Vps13b	VPS13B	99.5
ENSG00000160695	VPS11	VPS11	Vps11	VPS11	37.9
ENSG00000128218	VPREB3	VPREB3	Vpreb3	VPREB3	52.8
ENSG00000112299	VNN1	VNN1	Vnn1	VNN1	84.9
ENSG00000062716	VMP1	VMP1	Vmp1	VMP1	16.1
ENSG00000182853	VMO1	VMO1	Vmo1	VMO1	67.4
ENSG00000147852	VLDLR	VLDLR	Vldlr	VLDLR	65.2
ENSG00000205221	VIT	VIT	Vit	VIT	99
ENSG00000164944	VIRMA	VIRMA	Virma	VIRMA	5.3
ENSG00000106018	VIPR2	VIPR2	Vipr2	VIPR2	82.6
ENSG00000114812	VIPR1	VIPR1	Vipr1	VIPR1	91.2
ENSG00000151445	VIPAS39	VIPAS39	Vipas39	VIPAS39	66.8
ENSG00000146469	VIP	VIP	Vip	VIP	57.4
ENSG00000026025	VIM	VIM	Vim	VIM	14
ENSG00000136059	VILL	VILL	Vill	VILL	94.9
ENSG00000127831	VIL1	VIL1	Vil1	VIL1	77.6
ENSG00000144560	VGLL4	VGLL4	Vgll4	VGLL4	30.9
ENSG00000206538	VGLL3	VGLL3	Vgll3	VGLL3	34.7
ENSG00000102243	VGLL1	VGLL1	Vgll1	VGLL1	31.4
ENSG00000128564	VGF	VGF	Vgf	VGF	20.8
ENSG00000028203	VEZT	VEZT	Vezt	VEZT	50.4
ENSG00000136451	VEZF1	VEZF1	Vezf1	VEZF1	15.4
ENSG00000197415	VEPH1	VEPH1	Veph1	VEPH1	94.3
ENSG00000150630	VEGFC	VEGFC	Vegfc	VEGFC	42.3
ENSG00000173511	VEGFB	VEGFB	Vegfb	VEGFB	81.9
ENSG00000111424	VDR	VDR	Vdr	VDR	33
ENSG00000165637	VDAC2	VDAC2	Vdac2	VDAC2	21
ENSG00000100483	VCPKMT	VCPKMT	Vcpkmt	VCPKMT	87.8
ENSG00000175073	VCPIP1	VCPIP1	Vcpip1	VCPIP1	5.5
ENSG00000165280	VCP	VCP	Vcp	VCP	2.4
ENSG00000035403	VCL	VCL	Vcl	VCL	8.5
ENSG00000038427	VCAN	VCAN	Vcan	VCAN	4.5
ENSG00000155959	VBP1	VBP1	Vbp1	VBP1	20.9
ENSG00000116035	VAX2	VAX2	Vax2	VAX2	35.3
ENSG00000148704	VAX1	VAX1	Vax1	VAX1	29
ENSG00000134215	VAV3	VAV3	Vav3	VAV3	51.7
ENSG00000160293	VAV2	VAV2	Vav2	VAV2	61.1
ENSG00000141968	VAV1	VAV1	Vav1	VAV1	2.4
ENSG00000171724	VAT1L	VAT1L	Vat1l	VAT1L	76.4
ENSG00000108828	VAT1	VAT1	Vat1	VAT1	51.7
ENSG00000125753	VASP	VASP	Vasp	VASP	27.9
ENSG00000143494	VASH2	VASH2	Vash2	VASH2	21
ENSG00000071246	VASH1	VASH1	Vash1	VASH1	23.7
ENSG00000137411	VARS2	VARS2	Vars2	VARS2	96.4
ENSG00000204394	VARS1	VARS1	Vars	VARS1	25.2
ENSG00000101558	VAPA	VAPA	Vapa	VAPA	41.9
ENSG00000162738	VANGL2	VANGL2	Vangl2	VANGL2	14.9
ENSG00000173218	VANGL1	VANGL1	Vangl1	VANGL1	29
ENSG00000118640	VAMP8	VAMP8	Vamp8	VAMP8	36.4
ENSG00000168899	VAMP5	VAMP5	Vamp5	VAMP5	46.8
ENSG00000117533	VAMP4	VAMP4	Vamp4	VAMP4	16.7
ENSG00000139190	VAMP1	VAMP1	Vamp1	VAMP1	25.4
ENSG00000103043	VAC14	VAC14	Vac14	VAC14	26.7
ENSG00000126756	UXT	UXT	Uxt	UXT	20.4
ENSG00000115652	UXS1	UXS1	Uxs1	UXS1	45.4
ENSG00000163945	UVSSA	UVSSA	Uvssa	UVSSA	96.1
ENSG00000198382	UVRAG	UVRAG	Uvrag	UVRAG	19.6
ENSG00000188958	UTS2B	UTS2B	Uts2b	UTS2B	54.5
ENSG00000049247	UTS2	UTS2	Uts2	UTS2	40.5
ENSG00000152818	UTRN	UTRN	Utrn	UTRN	90.2
ENSG00000132467	UTP3	UTP3	Utp3	UTP3	60.7
ENSG00000117597	UTP25	UTP25	Utp25	UTP25	47.1
ENSG00000147679	UTP23	UTP23	Utp23	UTP23	49.2
ENSG00000120800	UTP20	UTP20	Utp20	UTP20	39.7
ENSG00000011260	UTP18	UTP18	Utp18	UTP18	32.4
ENSG00000164338	UTP15	UTP15	Utp15	UTP15	10.8
ENSG00000111962	UST	UST	Ust	UST	11.1
ENSG00000132952	USPL1	USPL1	Uspl1	USPL1	30.2
ENSG00000124486	USP9X	USP9X	Usp9x	USP9X	0.3
ENSG00000187555	USP7	USP7	Usp7	USP7	0.6
ENSG00000166348	USP54	USP54	Usp54	USP54	74.6
ENSG00000145390	USP53	USP53	Usp53	USP53	64.5
ENSG00000170236	USP50	USP50	Usp50	USP50	96.6
ENSG00000111667	USP5	USP5	Usp5	USP5	7.8
ENSG00000164663	USP49	USP49	Usp49	USP49	15.4
ENSG00000090686	USP48	USP48	Usp48	USP48	2
ENSG00000170242	USP47	USP47	Usp47	USP47	1.2
ENSG00000109189	USP46	USP46	Usp46	USP46	17.2
ENSG00000123552	USP45	USP45	Usp45	USP45	96.1
ENSG00000136014	USP44	USP44	Usp44	USP44	90.8
ENSG00000154914	USP43	USP43	Usp43	USP43	55.1
ENSG00000085982	USP40	USP40	Usp40	USP40	96.6
ENSG00000114316	USP4	USP4	Usp4	USP4	83.3
ENSG00000168883	USP39	USP39	Usp39	USP39	49.4
ENSG00000170185	USP38	USP38	Usp38	USP38	73.4
ENSG00000135913	USP37	USP37	Usp37	USP37	6.7
ENSG00000055483	USP36	USP36	Usp36	USP36	45.2
ENSG00000118369	USP35	USP35	Usp35	USP35	47.8
ENSG00000115464	USP34	USP34	Usp34	USP34	0.1
ENSG00000077254	USP33	USP33	Usp33	USP33	7.9
ENSG00000103404	USP31	USP31	Usp31	USP31	55.4
ENSG00000135093	USP30	USP30	Usp30	USP30	35.5
ENSG00000140455	USP3	USP3	Usp3	USP3	11
ENSG00000131864	USP29	USP26	Usp29	USP29	96.7
ENSG00000048028	USP28	USP28	Usp28	USP28	49.4
ENSG00000155313	USP25	USP25	Usp25	USP25	9.9
ENSG00000162402	USP24	USP24	Usp24	USP24	0.6
ENSG00000124422	USP22	USP22	Usp22	USP22	11.2
ENSG00000143258	USP21	USP21	Usp21	USP21	44.8
ENSG00000136878	USP20	USP20	Usp20	USP20	62.1
ENSG00000036672	USP2	USP2	Usp2	USP2	39.1
ENSG00000172046	USP19	USP19	Usp19	USP19	2.4
ENSG00000156256	USP16	USP16	Usp16	USP16	57.3
ENSG00000135655	USP15	USP15	Usp15	USP15	9.9
ENSG00000101557	USP14	USP14	Usp14	USP14	16.3
ENSG00000058056	USP13	USP13	Usp13	USP13	88
ENSG00000152484	USP12	USP12	Usp12	USP12	21.9
ENSG00000103194	USP10	USP10	Usp10	USP10	10.2
ENSG00000162607	USP1	USP1	Usp1	USP1	9.1
ENSG00000138768	USO1	USO1	Uso1	USO1	16.8
ENSG00000130307	USHBP1	USHBP1	Ushbp1	USHBP1	95.7
ENSG00000042781	USH2A	USH2A	Ush2a	USH2A	100
ENSG00000182040	USH1G	USH1G	Ush1g	USH1G	64.4
ENSG00000006611	USH1C	USH1C	Ush1c	USH1C	94.9
ENSG00000105698	USF2	USF2	Usf2	USF2	9.3
ENSG00000158773	USF1	USF1	Usf1	USF1	33.3
ENSG00000053501	USE1	USE1	Use1	USE1	53.2
ENSG00000103005	USB1	USB1	Usb1	USB1	42
ENSG00000188690	UROS	UROS	Uros	UROS	54.1
ENSG00000126088	UROD	UROD	Urod	UROD	70.8
ENSG00000159650	UROC1	UROC1	Uroc1	UROC1	92.1
ENSG00000167118	URM1	URM1	Urm1	URM1	30
ENSG00000105176	URI1	URI1	Uri1	URI1	38.4
ENSG00000106608	URGCP	URGCP	Urgcp	URGCP	38.5
ENSG00000135763	URB2	URB2	Urb2	URB2	93.6
ENSG00000010256	UQCRC1	UQCRC1	Uqcrc1	UQCRC1	41.4
ENSG00000137288	UQCC2	UQCC2	Uqcc2	UQCC2	46.1
ENSG00000101019	UQCC1	UQCC1	Uqcc1	UQCC1	58.2
ENSG00000094841	UPRT	UPRT	Uprt	UPRT	21.1
ENSG00000007001	UPP2	UPP2	Upp2	UPP2	61.8
ENSG00000183696	UPP1	UPP1	Upp1	UPP1	72.2
ENSG00000243566	UPK3B	UPK3B	Upk3b	UPK3B	69.9
ENSG00000100373	UPK3A	UPK3A	Upk3a	UPK3A	85.7
ENSG00000110375	UPK2	UPK2	Upk2	UPK2	80.6
ENSG00000114638	UPK1B	UPK1B	Upk1b	UPK1B	74.2
ENSG00000105668	UPK1A	UPK1A	Upk1a	UPK1A	74.9
ENSG00000125351	UPF3B	UPF3B	Upf3b	UPF3B	15.9
ENSG00000151461	UPF2	UPF2	Upf2	UPF2	1.9
ENSG00000100024	UPB1	UPB1	Upb1	UPB1	85.3
ENSG00000132478	UNK	UNK	Unk	UNK	8.7
ENSG00000110057	UNC93B1	UNC93B1	Unc93b1	UNC93B1	29.6
ENSG00000144406	UNC80	UNC80	Unc80	UNC80	41.1
ENSG00000133958	UNC79	UNC79	Unc79	UNC79	0.4
ENSG00000156687	UNC5D	UNC5D	Unc5d	UNC5D	19.9
ENSG00000124602	UNC5CL	UNC5CL	Unc5cl	UNC5CL	85.5
ENSG00000182168	UNC5C	UNC5C	Unc5c	UNC5C	52.5
ENSG00000107731	UNC5B	UNC5B	Unc5b	UNC5B	65.7
ENSG00000113763	UNC5A	UNC5A	Unc5a	UNC5A	7.9
ENSG00000115446	UNC50	UNC50	Unc50	UNC50	54.3
ENSG00000141161	UNC45B	UNC45B	Unc45b	UNC45B	87.8
ENSG00000140553	UNC45A	UNC45A	Unc45a	UNC45A	86.2
ENSG00000092929	UNC13D	UNC13D	Unc13d	UNC13D	94.9
ENSG00000137766	UNC13C	UNC13C	Unc13c	UNC13C	84.2
ENSG00000198722	UNC13B	UNC13B	Unc13b	UNC13B	73.1
ENSG00000130477	UNC13A	UNC13A	Unc13a	UNC13A	2.7
ENSG00000109103	UNC119	UNC119	Unc119	UNC119	55
ENSG00000114491	UMPS	UMPS	Umps	UMPS	71.6
ENSG00000177398	UMODL1	UMODL1	Umodl1	UMODL1	99.3
ENSG00000169344	UMOD	UMOD	Umod	UMOD	87.5
ENSG00000168038	ULK4	ULK4	Ulk4	ULK4	99.2
ENSG00000083290	ULK2	ULK2	Ulk2	ULK2	77.3
ENSG00000087206	UIMC1	UIMC1	Uimc1	UIMC1	49.3
ENSG00000152332	UHMK1	UHMK1	Uhmk1	UHMK1	23.8
ENSG00000174607	UGT8	UGT8	Ugt8a	UGT8	37.8
ENSG00000241635	UGT1A1	UGT1A1	Ugt1a1	UGT1A8	90.2
ENSG00000169764	UGP2	UGP2	Ugp2	UGP2	64.6
ENSG00000102595	UGGT2	UGGT2	Uggt2	UGGT2	99
ENSG00000136731	UGGT1	UGGT1	Uggt1	UGGT1	60.5
ENSG00000109814	UGDH	UGDH	Ugdh	UGDH	73.6
ENSG00000148154	UGCG	UGCG	Ugcg	UGCG	11.3
ENSG00000109775	UFSP2	UFSP2	Ufsp2	UFSP2	79.2
ENSG00000120686	UFM1	UFM1	Ufm1	UFM1	31
ENSG00000014123	UFL1	UFL1	Ufl1	UFL1	95
ENSG00000070010	UFD1	UFD1	Ufd1	UFD1	7.3
ENSG00000143222	UFC1	UFC1	Ufc1	UFC1	43.8
ENSG00000175564	UCP3	UCP3	Ucp3	UCP3	77.9
ENSG00000175567	UCP2	UCP2	Ucp2	UCP2	88.2
ENSG00000109424	UCP1	UCP1	Ucp1	UCP1	87.1
ENSG00000178473	UCN3	UCN3	Ucn3	UCN3	29.7
ENSG00000145040	UCN2	UCN2	Ucn2	UCN2	40.3
ENSG00000165623	UCMA	UCMA	Ucma	UCMA	85.3
ENSG00000198276	UCKL1	UCKL1	Uckl1	UCKL1	88.5
ENSG00000143179	UCK2	UCK2	Uck2	UCK2	13.7
ENSG00000130717	UCK1	UCK1	Uck1	UCK1	61.6
ENSG00000116750	UCHL5	UCHL5	Uchl5	UCHL5	22.2
ENSG00000163960	UBXN7	UBXN7	Ubxn7	UBXN7	9.8
ENSG00000167671	UBXN6	UBXN6	Ubxn6	UBXN6	47.3
ENSG00000144224	UBXN4	UBXN4	Ubxn4	UBXN4	12.5
ENSG00000215114	UBXN2B	UBXN2B	Ubxn2b	UBXN2B	30.3
ENSG00000173960	UBXN2A	UBXN2A	Ubxn2a	UBXN2A	66.5
ENSG00000158062	UBXN11	UBXN11	Ubxn11	UBXN11	92.8
ENSG00000162543	UBXN10	UBXN10	Ubxn10	UBXN10	68.7
ENSG00000162191	UBXN1	UBXN1	Ubxn1	UBXN1	22.6
ENSG00000168246	UBTD2	UBTD2	Ubtd2	UBTD2	23.2
ENSG00000165886	UBTD1	UBTD1	Ubtd1	UBTD1	22.4
ENSG00000104517	UBR5	UBR5	Ubr5	UBR5	0.1
ENSG00000127481	UBR4	UBR4	Ubr4	UBR4	0.1
ENSG00000024048	UBR2	UBR2	Ubr2	UBR2	1.2
ENSG00000159459	UBR1	UBR1	Ubr1	UBR1	35.2
ENSG00000175520	UBQLN3	UBQLN3	Ubqln3	UBQLN3	59.2
ENSG00000135018	UBQLN1	UBQLN1	Ubqln1	UBQLN1	6.2
ENSG00000153560	UBP1	UBP1	Ubp1	UBP1	4.3
ENSG00000185019	UBOX5	UBOX5	Ubox5	UBOX5	62.3
ENSG00000157741	UBN2	UBN2	Ubn2	UBN2	6.4
ENSG00000118900	UBN1	UBN1	Ubn1	UBN1	7.1
ENSG00000164332	UBLCP1	UBLCP1	Ublcp1	UBLCP1	42.2
ENSG00000122042	UBL3	UBL3	Ubl3	UBL3	24.1
ENSG00000120942	UBIAD1	UBIAD1	Ubiad1	UBIAD1	28.3
ENSG00000103353	UBFD1	UBFD1	Ubfd1	UBFD1	20.3
ENSG00000130939	UBE4B	UBE4B	Ube4b	UBE4B	2.6
ENSG00000110344	UBE4A	UBE4A	Ube4a	UBE4A	15.7
ENSG00000118420	UBE3D	UBE3D	Ube2cbp	UBE3D	86.2
ENSG00000009335	UBE3C	UBE3C	Ube3c	UBE3C	1.6
ENSG00000151148	UBE3B	UBE3B	Ube3b	UBE3B	55.2
ENSG00000114062	UBE3A	UBE3A	Ube3a	UBE3A	5
ENSG00000159202	UBE2Z	UBE2Z	Ube2z	UBE2Z	16.2
ENSG00000177414	UBE2U	UBE2U	Ube2u	UBE2U	86.4
ENSG00000077152	UBE2T	UBE2T	Ube2t	UBE2T	68
ENSG00000107341	UBE2R2	UBE2R2	Ube2r2	UBE2R2	17.4
ENSG00000160714	UBE2Q1	UBE2Q1	Ube2q1	UBE2Q1	13.1
ENSG00000175931	UBE2O	UBE2O	Ube2o	UBE2O	2.7
ENSG00000130725	UBE2M	UBE2M	Ube2m	UBE2M	27
ENSG00000156587	UBE2L6	UBE2L6	Ube2l6	UBE2L6	53.5
ENSG00000078140	UBE2K	UBE2K	Ube2k	UBE2K	13.7
ENSG00000198833	UBE2J1	UBE2J1	Ube2j1	UBE2J1	19.6
ENSG00000186591	UBE2H	UBE2H	Ube2h	UBE2H	12.9
ENSG00000184787	UBE2G2	UBE2G2	Ube2g2	UBE2G2	37.2
ENSG00000132388	UBE2G1	UBE2G1	Ube2g1	UBE2G1	23.3
ENSG00000170035	UBE2E3	UBE2E3	Ube2e3	UBE2E3	25.9
ENSG00000182247	UBE2E2	UBE2E2	Ube2e2	UBE2E2	16.4
ENSG00000131508	UBE2D2	UBE2D2	Ube2d2a	UBE2D2	15.2
ENSG00000072401	UBE2D1	UBE2D1	Ube2d1	UBE2D1	17.4
ENSG00000077721	UBE2A	UBE2A	Ube2a	UBE2A	21.7
ENSG00000154127	UBASH3B	UBASH3B	Ubash3b	UBASH3B	10.3
ENSG00000160185	UBASH3A	UBASH3A	Ubash3a	UBASH3A	84
ENSG00000143569	UBAP2L	UBAP2L	Ubap2l	UBAP2L	1.2
ENSG00000165006	UBAP1	UBAP1	Ubap1	UBAP1	14.5
ENSG00000185262	UBALD2	UBALD2	Ubald2	UBALD2	36.7
ENSG00000134882	UBAC2	UBAC2	Ubac2	UBAC2	42.5
ENSG00000182179	UBA7	UBA7	Uba7	UBA7	96.5
ENSG00000033178	UBA6	UBA6	Uba6	UBA6	16
ENSG00000081307	UBA5	UBA5	Uba5	UBA5	23.3
ENSG00000144744	UBA3	UBA3	Uba3	UBA3	13.3
ENSG00000126261	UBA2	UBA2	Uba2	UBA2	4.7
ENSG00000130985	UBA1	UBA1	Uba1	UBA1	2.5
ENSG00000117143	UAP1	UAP1	Uap1	UAP1	17.4
ENSG00000137831	UACA	UACA	Uaca	UACA	97.9
ENSG00000163714	U2SURP	U2SURP	U2surp	U2SURP	1.4
ENSG00000063244	U2AF2	U2AF2	U2af2	U2AF2	7.4
ENSG00000162971	TYW5	TYW5	Tyw5	TYW5	85
ENSG00000162623	TYW3	TYW3	Tyw3	TYW3	31.9
ENSG00000156521	TYSND1	TYSND1	Tysnd1	TYSND1	45.4
ENSG00000107165	TYRP1	TYRP1	Tyrp1	TYRP1	98.9
ENSG00000092445	TYRO3	TYRO3	Tyro3	TYRO3	22.8
ENSG00000077498	TYR	TYR	Tyr	TYR	98.8
ENSG00000105397	TYK2	TYK2	Tyk2	TYK2	58.8
ENSG00000184470	TXNRD2	TXNRD2	Txnrd2	TXNRD2	88.8
ENSG00000198431	TXNRD1	TXNRD1	Txnrd1	TXNRD1	61.4
ENSG00000141759	TXNL4A	TXNL4A	Txnl4a	TXNL4A	62.9
ENSG00000091164	TXNL1	TXNL1	Txnl1	TXNL1	14.3
ENSG00000265972	TXNIP	TXNIP	Txnip	TXNIP	37
ENSG00000115514	TXNDC9	TXNDC9	Txndc9	TXNDC9	37.9
ENSG00000204193	TXNDC8	TXNDC8	Txndc8	TXNDC8	20.4
ENSG00000239264	TXNDC5	TXNDC5	Txndc5	TXNDC5	81.5
ENSG00000168454	TXNDC2	TXNDC2	Txndc2	TXNDC2	84.6
ENSG00000129235	TXNDC17	TXNDC17	Txndc17	TXNDC17	48.9
ENSG00000087301	TXNDC16	TXNDC16	Txndc16	TXNDC16	85.4
ENSG00000153066	TXNDC11	TXNDC11	Txndc11	TXNDC11	60.1
ENSG00000100348	TXN2	TXN2	Txn2	TXN2	57.7
ENSG00000086712	TXLNG	TXLNG	Txlng	TXLNG	9.4
ENSG00000084652	TXLNA	TXLNA	Txlna	TXLNA	8
ENSG00000128791	TWSG1	TWSG1	Twsg1	TWSG1	18.2
ENSG00000107815	TWNK	TWNK	Twnk	TWNK	9.9
ENSG00000122691	TWIST1	TWIST1	Twist1	TWIST1	39.2
ENSG00000247596	TWF2	TWF2	Twf2	TWF2	19.6
ENSG00000151239	TWF1	TWF1	Twf1	TWF1	55.9
ENSG00000166676	TVP23A	TVP23A	Tvp23a	TVP23A	81.3
ENSG00000083223	TUT7	TUT7	Tut7	TUT7	1.5
ENSG00000134744	TUT4	TUT4	Tut4	TUT4	0.6
ENSG00000104723	TUSC3	TUSC3	Tusc3	TUSC3	62
ENSG00000130338	TULP4	TULP4	Tulp4	TULP4	3.4
ENSG00000078246	TULP3	TULP3	Tulp3	TULP3	64.6
ENSG00000104804	TULP2	TULP2	Tulp2	TULP2	85.3
ENSG00000112041	TULP1	TULP1	Tulp1	TULP1	21.3
ENSG00000143367	TUFT1	TUFT1	Tuft1	TUFT1	52.2
ENSG00000137822	TUBGCP4	TUBGCP4	Tubgcp4	TUBGCP4	57.9
ENSG00000126216	TUBGCP3	TUBGCP3	Tubgcp3	TUBGCP3	14.5
ENSG00000130640	TUBGCP2	TUBGCP2	Tubgcp2	TUBGCP2	73.9
ENSG00000037042	TUBG2	TUBG2	Tubg2	TUBG2	58.8
ENSG00000131462	TUBG1	TUBG1	Tubg1	TUBG1	12.3
ENSG00000074935	TUBE1	TUBE1	Tube1	TUBE1	77.5
ENSG00000108423	TUBD1	TUBD1	Tubd1	TUBD1	68
ENSG00000176014	TUBB6	TUBB6	Tubb6	TUBB6	67
ENSG00000188229	TUBB4B	TUBB4B	Tubb4b	TUBB4B	16.2
ENSG00000104833	TUBB4A	TUBB4A	Tubb4a	TUBB4A	60.3
ENSG00000101162	TUBB1	TUBB1	Tubb1	TUBB1	78.9
ENSG00000196230	TUBB	TUBB	Tubb5	TUBB	18.9
ENSG00000178462	TUBAL3	TUBAL3	Tubal3	TUBAL3	70.3
ENSG00000183785	TUBA8	TUBA8	Tuba8	TUBA8	60
ENSG00000127824	TUBA4A	TUBA4A	Tuba4a	TUBA4A	49.7
ENSG00000123416	TUBA1B	TUBA1B	Tuba1b	TUBA1B	20.7
ENSG00000166402	TUB	TUB	Tub	TUB	30.8
ENSG00000141540	TTYH2	TTYH2	Ttyh2	TTYH2	34.3
ENSG00000167614	TTYH1	TTYH1	Ttyh1	TTYH1	6.6
ENSG00000118271	TTR	TTR	Ttr	TTR	41.5
ENSG00000124120	TTPAL	TTPAL	Ttpal	TTPAL	26.3
ENSG00000137561	TTPA	TTPA	Ttpa	TTPA	55
ENSG00000131044	TTLL9	TTLL9	Ttll9	TTLL9	91.8
ENSG00000137941	TTLL7	TTLL7	Ttll7	TTLL7	36.6
ENSG00000170703	TTLL6	TTLL6	Ttll6	TTLL6	86.5
ENSG00000135912	TTLL4	TTLL4	Ttll4	TTLL4	80.6
ENSG00000120440	TTLL2	TTLL2	Ttll2	TTLL2	79.6
ENSG00000100304	TTLL12	TTLL12	Ttll12	TTLL12	97.1
ENSG00000162571	TTLL10	TTLL10	Ttll10	TTLL10	76.3
ENSG00000100271	TTLL1	TTLL1	Ttll1	TTLL1	57.6
ENSG00000112742	TTK	TTK	Ttk	TTK	57.8
ENSG00000129696	TTI2	TTI2	Tti2	TTI2	62.1
ENSG00000101407	TTI1	TTI1	Tti1	TTI1	69.2
ENSG00000125482	TTF1	TTF1	Ttf1	TTF1	82
ENSG00000174521	TTC9B	TTC9B	Ttc9b	TTC9B	50.2
ENSG00000133985	TTC9	TTC9	Ttc9	TTC9	46.1
ENSG00000165533	TTC8	TTC8	Ttc8	TTC8	34.4
ENSG00000165914	TTC7B	TTC7B	Ttc7b	TTC7B	3.7
ENSG00000068724	TTC7A	TTC7A	Ttc7	TTC7A	90.5
ENSG00000136319	TTC5	TTC5	Ttc5	TTC5	61.1
ENSG00000243725	TTC4	TTC4	Ttc4	TTC4	47.7
ENSG00000155158	TTC39B	TTC39B	Ttc39b	TTC39B	94.2
ENSG00000085831	TTC39A	TTC39A	Ttc39a	TTC39A	43.3
ENSG00000075234	TTC38	TTC38	Ttc38	TTC38	91.6
ENSG00000183891	TTC32	TTC32	Ttc32	TTC32	43.8
ENSG00000182670	TTC3	TTC3	Ttc3	TTC3	98.7
ENSG00000137473	TTC29	TTC29	Ttc29	TTC29	81.8
ENSG00000018699	TTC27	TTC27	Ttc27	TTC27	89.3
ENSG00000187862	TTC24	TTC24	Ttc24	TTC24	73.1
ENSG00000205838	TTC23L	TTC23L	Ttc23l	TTC23L	90.4
ENSG00000103852	TTC23	TTC23	Ttc23	TTC23	97.5
ENSG00000006555	TTC22	TTC22	Ttc22	TTC22	65.2
ENSG00000123607	TTC21B	TTC21B	Ttc21b	TTC21B	99
ENSG00000011295	TTC19	TTC19	Ttc19	TTC19	92.9
ENSG00000052841	TTC17	TTC17	Ttc17	TTC17	4.5
ENSG00000167094	TTC16	TTC16	Ttc16	TTC16	94.6
ENSG00000163728	TTC14	TTC14	Ttc14	TTC14	79.8
ENSG00000143643	TTC13	TTC13	Ttc13	TTC13	25.4
ENSG00000149292	TTC12	TTC12	Ttc12	TTC12	85.7
ENSG00000113312	TTC1	TTC1	Ttc1	TTC1	62.2
ENSG00000128881	TTBK2	TTBK2	Ttbk2	TTBK2	7.6
ENSG00000136925	TSTD2	TSTD2	Tstd2	TSTD2	81.7
ENSG00000128311	TST	TST	Tst	TST	65.8
ENSG00000139908	TSSK4	TSSK4	Tssk4	TSSK4	93.8
ENSG00000184281	TSSC4	TSSC4	Tssc4	TSSC4	53.7
ENSG00000007520	TSR3	TSR3	Tsr3	TSR3	61.2
ENSG00000167721	TSR1	TSR1	Tsr1	TSR1	98.6
ENSG00000100300	TSPO	TSPO	Tspo	TSPO	51.2
ENSG00000175894	TSPEAR	TSPEAR	Tspear	TSPEAR	92.5
ENSG00000127324	TSPAN8	TSPAN8	Tspan8	TSPAN8	55.5
ENSG00000000003	TSPAN6	TSPAN6	Tspan6	TSPAN6	50
ENSG00000168785	TSPAN5	TSPAN5	Tspan5	TSPAN5	16.2
ENSG00000214063	TSPAN4	TSPAN4	Tspan4	TSPAN4	80.8
ENSG00000158457	TSPAN33	TSPAN33	Tspan33	TSPAN33	71.8
ENSG00000135452	TSPAN31	TSPAN31	Tspan31	TSPAN31	34.9
ENSG00000134198	TSPAN2	TSPAN2	Tspan2	TSPAN2	71.8
ENSG00000157570	TSPAN18	TSPAN18	Tspan18	TSPAN18	40.1
ENSG00000048140	TSPAN17	TSPAN17	Tspan17	TSPAN17	77.3
ENSG00000099282	TSPAN15	TSPAN15	Tspan15	TSPAN15	62.2
ENSG00000108219	TSPAN14	TSPAN14	Tspan14	TSPAN14	19.4
ENSG00000106025	TSPAN12	TSPAN12	Tspan12	TSPAN12	28.5
ENSG00000110900	TSPAN11	TSPAN11	Tspan11	TSPAN11	75.2
ENSG00000117472	TSPAN1	TSPAN1	Tspan1	TSPAN1	65.9
ENSG00000102904	TSNAXIP1	TSNAXIP1	Tsnaxip1	TSNAXIP1	98.1
ENSG00000211460	TSN	TSN	Tsn	TSN	15.2
ENSG00000182704	TSKU	TSKU	Tsku	TSKU	23.8
ENSG00000126467	TSKS	TSKS	Tsks	TSKS	11.6
ENSG00000121297	TSHZ3	TSHZ3	Tshz3	TSHZ3	32.1
ENSG00000182463	TSHZ2	TSHZ2	Tshz2	TSHZ2	32.6
ENSG00000179981	TSHZ1	TSHZ1	Tshz1	TSHZ1	15.6
ENSG00000165409	TSHR	TSHR	Tshr	TSHR	79.2
ENSG00000134200	TSHB	TSHB	Tshb	TSHB	57.4
ENSG00000213265	TSGA13	TSGA13	Tsga13	TSGA13	89.4
ENSG00000135951	TSGA10	TSGA10	Tsga10	TSGA10	18
ENSG00000074319	TSG101	TSG101	Tsg101	TSG101	11.3
ENSG00000123297	TSFM	TSFM	Tsfm	TSFM	86.1
ENSG00000182173	TSEN54	TSEN54	Tsen54	TSEN54	76.6
ENSG00000170892	TSEN34	TSEN34	Tsen34	TSEN34	32.8
ENSG00000154743	TSEN2	TSEN2	Tsen2	TSEN2	71.7
ENSG00000198860	TSEN15	TSEN15	Tsen15	TSEN15	29.8
ENSG00000166925	TSC22D4	TSC22D4	Tsc22d4	TSC22D4	18
ENSG00000196428	TSC22D2	TSC22D2	Tsc22d2	TSC22D2	20.6
ENSG00000103197	TSC2	TSC2	Tsc2	TSC2	0.9
ENSG00000165699	TSC1	TSC1	Tsc1	TSC1	2.9
ENSG00000163467	TSACC	TSACC	Tsacc	TSACC	45.1
ENSG00000165832	TRUB1	TRUB1	Trub1	TRUB1	66.9
ENSG00000196367	TRRAP	TRRAP	Trrap	TRRAP	0.1
ENSG00000111199	TRPV4	TRPV4	Trpv4	TRPV4	78.8
ENSG00000167723	TRPV3	TRPV3	Trpv3	TRPV3	96.1
ENSG00000187688	TRPV2	TRPV2	Trpv2	TRPV2	57.6
ENSG00000196689	TRPV1	TRPV1	Trpv1	TRPV1	96.3
ENSG00000149743	TRPT1	TRPT1	Trpt1	TRPT1	55.5
ENSG00000104447	TRPS1	TRPS1	Trps1	TRPS1	9.9
ENSG00000144481	TRPM8	TRPM8	Trpm8	TRPM8	96.9
ENSG00000092439	TRPM7	TRPM7	Trpm7	TRPM7	88.4
ENSG00000070985	TRPM5	TRPM5	Trpm5	TRPM5	97.7
ENSG00000142185	TRPM2	TRPM2	Trpm2	TRPM2	99.3
ENSG00000069018	TRPC7	TRPC7	Trpc7	TRPC7	60.3
ENSG00000137672	TRPC6	TRPC6	Trpc6	TRPC6	58.6
ENSG00000072315	TRPC5	TRPC5	Trpc5	TRPC5	9
ENSG00000100991	TRPC4AP	TRPC4AP	Trpc4ap	TRPC4AP	5.1
ENSG00000133107	TRPC4	TRPC4	Trpc4	TRPC4	13.3
ENSG00000138741	TRPC3	TRPC3	Trpc3	TRPC3	67.4
ENSG00000144935	TRPC1	TRPC1	Trpc1	TRPC1	22.1
ENSG00000104321	TRPA1	TRPA1	Trpa1	TRPA1	99.1
ENSG00000135451	TROAP	TROAP	Troap	TROAP	84.5
ENSG00000067445	TRO	TRO	Tro	TRO	62.6
ENSG00000072756	TRNT1	TRNT1	Trnt1	TRNT1	80.9
ENSG00000180098	TRNAU1AP	TRNAU1AP	Trnau1ap	TRNAU1AP	18.5
ENSG00000100416	TRMU	TRMU	Trmu	TRMU	89.5
ENSG00000166166	TRMT61A	TRMT61A	Trmt61a	TRMT61A	57.5
ENSG00000089195	TRMT6	TRMT6	Trmt6	TRMT6	67.1
ENSG00000126814	TRMT5	TRMT5	Trmt5	TRMT5	13.5
ENSG00000155275	TRMT44	TRMT44	Trmt44	TRMT44	96
ENSG00000099899	TRMT2A	TRMT2A	Trmt2a	TRMT2A	77.3
ENSG00000121486	TRMT1L	TRMT1L	Trmt1l	TRMT1L	15.6
ENSG00000122435	TRMT13	TRMT13	Trmt13	TRMT13	75.3
ENSG00000183665	TRMT12	TRMT12	Trmt12	TRMT12	15.4
ENSG00000066651	TRMT11	TRMT11	Trmt11	TRMT11	78.6
ENSG00000174173	TRMT10C	TRMT10C	Trmt10c	TRMT10C	77.9
ENSG00000165275	TRMT10B	TRMT10B	Trmt10b	TRMT10B	72.2
ENSG00000145331	TRMT10A	TRMT10A	Trmt10a	TRMT10A	75.3
ENSG00000104907	TRMT1	TRMT1	Trmt1	TRMT1	78.4
ENSG00000043514	TRIT1	TRIT1	Trit1	TRIT1	91.2
ENSG00000087077	TRIP6	TRIP6	Trip6	TRIP6	25.8
ENSG00000103671	TRIP4	TRIP4	Trip4	TRIP4	84.5
ENSG00000071539	TRIP13	TRIP13	Trip13	TRIP13	13.2
ENSG00000153827	TRIP12	TRIP12	Trip12	TRIP12	0.3
ENSG00000100815	TRIP11	TRIP11	Trip11	TRIP11	90.4
ENSG00000125733	TRIP10	TRIP10	Trip10	TRIP10	34
ENSG00000100106	TRIOBP	TRIOBP	Triobp	TRIOBP	95.3
ENSG00000179046	TRIML2	TRIML2	Triml2	TRIML2	91.2
ENSG00000184108	TRIML1	TRIML1	Triml1	TRIML1	93
ENSG00000100505	TRIM9	TRIM9	Trim9	TRIM9	10.4
ENSG00000171206	TRIM8	TRIM8	Trim8	TRIM8	9.4
ENSG00000177238	TRIM72	TRIM72	Trim72	TRIM72	66.9
ENSG00000146054	TRIM7	TRIM7	Trim7	TRIM7	45.4
ENSG00000185880	TRIM69	TRIM69	Trim69	TRIM69	92.5
ENSG00000167333	TRIM68	TRIM68	Trim68	TRIM68	93.9
ENSG00000119283	TRIM67	TRIM67	Trim67	TRIM67	25.5
ENSG00000141569	TRIM65	TRIM65	Trim65	TRIM65	90.3
ENSG00000158022	TRIM63	TRIM63	Trim63	TRIM63	94.7
ENSG00000116525	TRIM62	TRIM62	Trim62	TRIM62	62.8
ENSG00000121236	TRIM6	TRIM6	Trim6	TRIM6	92
ENSG00000162722	TRIM58	TRIM58	Trim58	TRIM58	85.1
ENSG00000147573	TRIM55	TRIM55	Trim55	TRIM55	69.7
ENSG00000132481	TRIM47	TRIM47	Trim47	TRIM47	35.1
ENSG00000163462	TRIM46	TRIM46	Trim46	TRIM46	6.3
ENSG00000134253	TRIM45	TRIM45	Trim45	TRIM45	82
ENSG00000166326	TRIM44	TRIM44	Trim44	TRIM44	40
ENSG00000155890	TRIM42	TRIM42	Trim42	TRIM42	96.8
ENSG00000146063	TRIM41	TRIM41	Trim41	TRIM41	13.5
ENSG00000204614	TRIM40	TRIM40	Trim40	TRIM40	85.6
ENSG00000112343	TRIM38	TRIM38	Trim38	TRIM38	79.6
ENSG00000108395	TRIM37	TRIM37	Trim37	TRIM37	39.6
ENSG00000152503	TRIM36	TRIM36	Trim36	TRIM36	66.1
ENSG00000104228	TRIM35	TRIM35	Trim35	TRIM35	65
ENSG00000197323	TRIM33	TRIM33	Trim33	TRIM33	1.9
ENSG00000119401	TRIM32	TRIM32	Trim32	TRIM32	43.3
ENSG00000110171	TRIM3	TRIM3	Trim3	TRIM3	14.5
ENSG00000137699	TRIM29	TRIM29	Trim29	TRIM29	72.1
ENSG00000130726	TRIM28	TRIM28	Trim28	TRIM28	3.8
ENSG00000204713	TRIM27	TRIM27	Trim27	TRIM27	18.7
ENSG00000234127	TRIM26	TRIM26	Trim26	TRIM26	20.6
ENSG00000121060	TRIM25	TRIM25	Trim25	TRIM25	41.3
ENSG00000122779	TRIM24	TRIM24	Trim24	TRIM24	2.2
ENSG00000113595	TRIM23	TRIM23	Trim23	TRIM23	45.3
ENSG00000132109	TRIM21	TRIM21	Trim21	TRIM21	43.6
ENSG00000109654	TRIM2	TRIM2	Trim2	TRIM2	18
ENSG00000162931	TRIM17	TRIM17	Trim17	TRIM17	75.8
ENSG00000204610	TRIM15	TRIM15	Trim15	TRIM15	93.8
ENSG00000106785	TRIM14	TRIM14	Trim14	TRIM14	54.8
ENSG00000204977	TRIM13	TRIM13	Trim13	TRIM13	29.8
ENSG00000154370	TRIM11	TRIM11	Trim11	TRIM11	28.7
ENSG00000204613	TRIM10	TRIM10	Trim10	TRIM10	78.1
ENSG00000101255	TRIB3	TRIB3	Trib3	TRIB3	92.4
ENSG00000071575	TRIB2	TRIB2	Trib2	TRIB2	16.3
ENSG00000173334	TRIB1	TRIB1	Trib1	TRIB1	27.3
ENSG00000174417	TRHR	TRHR	Trhr	TRHR	36.6
ENSG00000072657	TRHDE	TRHDE	Trhde	TRHDE	44.4
ENSG00000170893	TRH	TRH	Trh	TRH	54.6
ENSG00000112195	TREML2	TREML2	Treml2	TREML2	85.8
ENSG00000161911	TREML1	TREML1	Treml1	TREML1	78
ENSG00000095970	TREM2	TREM2	Trem2	TREM2	88
ENSG00000124731	TREM1	TREM1	Trem1	TREM1	68.2
ENSG00000118094	TREH	TREH	Treh	TREH	96.6
ENSG00000107614	TRDMT1	TRDMT1	Trdmt1	TRDMT1	81.7
ENSG00000163519	TRAT1	TRAT1	Trat1	TRAT1	30.4
ENSG00000184811	TRARG1	TRARG1	Trarg1	TRARG1	43
ENSG00000167632	TRAPPC9	TRAPPC9	Trappc9	TRAPPC9	79.3
ENSG00000153339	TRAPPC8	TRAPPC8	Trappc8	TRAPPC8	1.3
ENSG00000182400	TRAPPC6B	TRAPPC6B	Trappc6b	TRAPPC6B	51.2
ENSG00000181029	TRAPPC5	TRAPPC5	Trappc5	TRAPPC5	28
ENSG00000054116	TRAPPC3	TRAPPC3	Trappc3	TRAPPC3	21.3
ENSG00000146826	TRAPPC14	TRAPPC14	Trappc14	TRAPPC14	35.7
ENSG00000113597	TRAPPC13	TRAPPC13	Trappc13	TRAPPC13	22.7
ENSG00000171853	TRAPPC12	TRAPPC12	Trappc12	TRAPPC12	90.9
ENSG00000168538	TRAPPC11	TRAPPC11	Trappc11	TRAPPC11	69.7
ENSG00000170043	TRAPPC1	TRAPPC1	Trappc1	TRAPPC1	37.8
ENSG00000126602	TRAP1	TRAP1	Trap1	TRAP1	98
ENSG00000168016	TRANK1	TRANK1	Trank1	TRANK1	92.2
ENSG00000065308	TRAM2	TRAM2	Tram2	TRAM2	8.3
ENSG00000174599	TRAM1L1	TRAM1L1	Tram1l1	TRAM1L1	49.6
ENSG00000067167	TRAM1	TRAM1	Tram1	TRAM1	25.3
ENSG00000115993	TRAK2	TRAK2	Trak2	TRAK2	91.4
ENSG00000182606	TRAK1	TRAK1	Trak1	TRAK1	72
ENSG00000183763	TRAIP	TRAIP	Traip	TRAIP	41.8
ENSG00000135148	TRAFD1	TRAFD1	Trafd1	TRAFD1	76.5
ENSG00000131653	TRAF7	TRAF7	Traf7	TRAF7	31.1
ENSG00000175104	TRAF6	TRAF6	Traf6	TRAF6	7.6
ENSG00000082512	TRAF5	TRAF5	Traf5	TRAF5	78.4
ENSG00000076604	TRAF4	TRAF4	Traf4	TRAF4	20.3
ENSG00000009790	TRAF3IP3	TRAF3IP3	Traf3ip3	TRAF3IP3	82.1
ENSG00000056972	TRAF3IP2	TRAF3IP2	Traf3ip2	TRAF3IP2	72.9
ENSG00000204104	TRAF3IP1	TRAF3IP1	Traf3ip1	TRAF3IP1	70.5
ENSG00000131323	TRAF3	TRAF3	Traf3	TRAF3	6.6
ENSG00000056558	TRAF1	TRAF1	Traf1	TRAF1	46.3
ENSG00000269113	TRABD2B	TRABD2B	Trabd2b	TRABD2B	33.6
ENSG00000170638	TRABD	TRABD	Trabd	TRABD	16.1
ENSG00000136527	TRA2B	TRA2B	Tra2b	TRA2B	10.3
ENSG00000164548	TRA2A	TRA2A	Tra2a	TRA2A	38.4
ENSG00000088325	TPX2	TPX2	Tpx2	TPX2	9.4
ENSG00000169902	TPST1	TPST1	Tpst1	TPST1	54.3
ENSG00000144034	TPRKB	TPRKB	Tprkb	TPRKB	51.5
ENSG00000158109	TPRG1L	TPRG1L	Tprgl	TPRG1L	60.6
ENSG00000188001	TPRG1	TPRG1	Tprg	TPRG1	74
ENSG00000163870	TPRA1	TPRA1	Tpra1	TPRA1	46.2
ENSG00000159713	TPPP3	TPPP3	Tppp3	TPPP3	35.4
ENSG00000179636	TPPP2	TPPP2	Tppp2	TPPP2	52.4
ENSG00000134900	TPP2	TPP2	Tpp2	TPP2	4
ENSG00000166340	TPP1	TPP1	Tpp1	TPP1	50.4
ENSG00000137364	TPMT	TPMT	Tpmt	TPMT	72.7
ENSG00000198467	TPM2	TPM2	Tpm2	TPM2	74.1
ENSG00000139287	TPH2	TPH2	Tph2	TPH2	24.7
ENSG00000134779	TPGS2	TPGS2	Tpgs2	TPGS2	71.1
ENSG00000101150	TPD52L2	TPD52L2	Tpd52l2	TPD52L2	27.5
ENSG00000111907	TPD52L1	TPD52L1	Tpd52l1	TPD52L1	55.7
ENSG00000186815	TPCN1	TPCN1	Tpcn1	TPCN1	59.2
ENSG00000146242	TPBG	TPBG	Tpbg	TPBG	42
ENSG00000078900	TP73	TP73	Trp73	TP73	12.3
ENSG00000073282	TP63	TP63	Trp63	TP63	11.2
ENSG00000124251	TP53TG5	TP53TG5	Trp53tg5	TP53TG5	80.4
ENSG00000078804	TP53INP2	TP53INP2	Trp53inp2	TP53INP2	34.5
ENSG00000164938	TP53INP1	TP53INP1	Trp53inp1	TP53INP1	73
ENSG00000167543	TP53I13	TP53I13	Trp53i13	TP53I13	45.7
ENSG00000175274	TP53I11	TP53I11	Trp53i11	TP53I11	45.3
ENSG00000067369	TP53BP1	TP53BP1	Trp53bp1	TP53BP1	4.1
ENSG00000141510	TP53	TP53	Trp53	TP53	17.2
ENSG00000092203	TOX4	TOX4	Tox4	TOX4	21.2
ENSG00000103460	TOX3	TOX3	Tox3	TOX3	8.7
ENSG00000124191	TOX2	TOX2	Tox2	TOX2	25.4
ENSG00000198846	TOX	TOX	Tox	TOX	18.1
ENSG00000186283	TOR3A	TOR3A	Tor3a	TOR3A	87.9
ENSG00000136816	TOR1B	TOR1B	Tor1b	TOR1B	23.3
ENSG00000169905	TOR1AIP2	TOR1AIP2	Tor1aip2	TOR1AIP2	74.5
ENSG00000143337	TOR1AIP1	TOR1AIP1	Tor1aip1	TOR1AIP1	45.6
ENSG00000136827	TOR1A	TOR1A	Tor1a	TOR1A	39.9
ENSG00000197579	TOPORS	TOPORS	Topors	TOPORS	12.3
ENSG00000163781	TOPBP1	TOPBP1	Topbp1	TOPBP1	1.1
ENSG00000100038	TOP3B	TOP3B	Top3b	TOP3B	42.4
ENSG00000177302	TOP3A	TOP3A	Top3a	TOP3A	87.8
ENSG00000077097	TOP2B	TOP2B	Top2b	TOP2B	7.3
ENSG00000131747	TOP2A	TOP2A	Top2a	TOP2A	7.9
ENSG00000184428	TOP1MT	TOP1MT	Top1mt	TOP1MT	98.5
ENSG00000198900	TOP1	TOP1	Top1	TOP1	1.5
ENSG00000158882	TOMM40L	TOMM40L	Tomm40l	TOMM40L	23.3
ENSG00000130204	TOMM40	TOMM40	Tomm40	TOMM40	13.6
ENSG00000025772	TOMM34	TOMM34	Tomm34	TOMM34	24
ENSG00000196860	TOMM20L	TOMM20L	Tomm20l	TOMM20L	65.6
ENSG00000175662	TOM1L2	TOM1L2	Tom1l2	TOM1L2	32.4
ENSG00000141198	TOM1L1	TOM1L1	Tom1l1	TOM1L1	60.4
ENSG00000100284	TOM1	TOM1	Tom1	TOM1	79
ENSG00000078902	TOLLIP	TOLLIP	Tollip	TOLLIP	29.4
ENSG00000189350	TOGARAM2	TOGARAM2	Togaram2	TOGARAM2	98.8
ENSG00000198718	TOGARAM1	TOGARAM1	Togaram1	TOGARAM1	80.6
ENSG00000132773	TOE1	TOE1	Toe1	TOE1	89.3
ENSG00000183864	TOB2	TOB2	Tob2	TOB2	24.5
ENSG00000141232	TOB1	TOB1	Tob1	TOB1	21.7
ENSG00000131746	TNS4	TNS4	Tns4	TNS4	71.1
ENSG00000136205	TNS3	TNS3	Tns3	TNS3	5.4
ENSG00000079308	TNS1	TNS1	Tns1	TNS1	16.4
ENSG00000078687	TNRC6C	TNRC6C	Tnrc6c	TNRC6C	2
ENSG00000100354	TNRC6B	TNRC6B	Tnrc6b	TNRC6B	1.2
ENSG00000090905	TNRC6A	TNRC6A	Tnrc6a	TNRC6A	1.1
ENSG00000116147	TNR	TNR	Tnr	TNR	10.5
ENSG00000064419	TNPO3	TNPO3	Tnpo3	TNPO3	63.4
ENSG00000083312	TNPO1	TNPO1	Tnpo1	TNPO1	1.8
ENSG00000178279	TNP2	TNP2	Tnp2	TNP2	47.7
ENSG00000130595	TNNT3	TNNT3	Tnnt3	TNNT3	58.4
ENSG00000118194	TNNT2	TNNT2	Tnnt2	TNNT2	53.9
ENSG00000130598	TNNI2	TNNI2	Tnni2	TNNI2	44
ENSG00000159173	TNNI1	TNNI1	Tnni1	TNNI1	42.1
ENSG00000101470	TNNC2	TNNC2	Tnnc2	TNNC2	28.7
ENSG00000114854	TNNC1	TNNC1	Tnnc1	TNNC1	29.7
ENSG00000120332	TNN	TNN	Tnn	TNN	96.8
ENSG00000000005	TNMD	TNMD	Tnmd	TNMD	21.1
ENSG00000107854	TNKS2	TNKS2	Tnks2	TNKS2	23.6
ENSG00000149115	TNKS1BP1	TNKS1BP1	Tnks1bp1	TNKS1BP1	49.7
ENSG00000173273	TNKS	TNKS	Tnks	TNKS	22.4
ENSG00000061938	TNK2	TNK2	Tnk2	TNK2	92.8
ENSG00000174292	TNK1	TNK1	Tnk1	TNK1	72.3
ENSG00000050730	TNIP3	TNIP3	Tnip3	TNIP3	35
ENSG00000145901	TNIP1	TNIP1	Tnip1	TNIP1	16.2
ENSG00000106952	TNFSF8	TNFSF8	Tnfsf8	TNFSF8	19.8
ENSG00000117586	TNFSF4	TNFSF4	Tnfsf4	TNFSF4	41.8
ENSG00000120337	TNFSF18	TNFSF18	Tnfsf18	TNFSF18	67.2
ENSG00000181634	TNFSF15	TNFSF15	Tnfsf15	TNFSF15	33.8
ENSG00000125735	TNFSF14	TNFSF14	Tnfsf14	TNFSF14	21.2
ENSG00000102524	TNFSF13B	TNFSF13B	Tnfsf13b	TNFSF13B	14.3
ENSG00000161955	TNFSF13	TNFSF13	Tnfsf13	TNFSF13	18.7
ENSG00000120659	TNFSF11	TNFSF11	Tnfsf11	TNFSF11	41.6
ENSG00000121858	TNFSF10	TNFSF10	Tnfsf10	TNFSF10	32.6
ENSG00000049249	TNFRSF9	TNFRSF9	Tnfrsf9	TNFRSF9	37
ENSG00000120949	TNFRSF8	TNFRSF8	Tnfrsf8	TNFRSF8	20.1
ENSG00000186827	TNFRSF4	TNFRSF4	Tnfrsf4	TNFRSF4	56.5
ENSG00000215788	TNFRSF25	TNFRSF25	Tnfrsf25	TNFRSF25	31.4
ENSG00000146072	TNFRSF21	TNFRSF21	Tnfrsf21	TNFRSF21	25.9
ENSG00000028137	TNFRSF1B	TNFRSF1B	Tnfrsf1b	TNFRSF1B	22.3
ENSG00000067182	TNFRSF1A	TNFRSF1A	Tnfrsf1a	TNFRSF1A	10.9
ENSG00000127863	TNFRSF19	TNFRSF19	Tnfrsf19	TNFRSF19	51.7
ENSG00000186891	TNFRSF18	TNFRSF18	Tnfrsf18	TNFRSF18	82.8
ENSG00000048462	TNFRSF17	TNFRSF17	Tnfrsf17	TNFRSF17	60.2
ENSG00000159958	TNFRSF13C	TNFRSF13C	Tnfrsf13c	TNFRSF13C	26.3
ENSG00000164761	TNFRSF11B	TNFRSF11B	Tnfrsf11b	TNFRSF11B	36.4
ENSG00000141655	TNFRSF11A	TNFRSF11A	Tnfrsf11a	TNFRSF11A	18.6
ENSG00000183578	TNFAIP8L3	TNFAIP8L3	Tnfaip8l3	TNFAIP8L3	81
ENSG00000185361	TNFAIP8L1	TNFAIP8L1	Tnfaip8l1	TNFAIP8L1	31.1
ENSG00000145779	TNFAIP8	TNFAIP8	Tnfaip8	TNFAIP8	37.4
ENSG00000123610	TNFAIP6	TNFAIP6	Tnfaip6	TNFAIP6	80
ENSG00000118503	TNFAIP3	TNFAIP3	Tnfaip3	TNFAIP3	4.8
ENSG00000109079	TNFAIP1	TNFAIP1	Tnfaip1	TNFAIP1	56.4
ENSG00000232810	TNF	TNF	Tnf	TNF	36.4
ENSG00000041982	TNC	TNC	Tnc	TNC	77.1
ENSG00000125827	TMX4	TMX4	Tmx4	TMX4	54.7
ENSG00000166479	TMX3	TMX3	Tmx3	TMX3	38.9
ENSG00000139921	TMX1	TMX1	Tmx1	TMX1	59.9
ENSG00000168591	TMUB2	TMUB2	Tmub2	TMUB2	63.7
ENSG00000164897	TMUB1	TMUB1	Tmub1	TMUB1	35.3
ENSG00000125247	TMTC4	TMTC4	Tmtc4	TMTC4	80
ENSG00000139324	TMTC3	TMTC3	Tmtc3	TMTC3	55.3
ENSG00000179104	TMTC2	TMTC2	Tmtc2	TMTC2	19.4
ENSG00000133687	TMTC1	TMTC1	Tmtc1	TMTC1	84.5
ENSG00000176040	TMPRSS7	TMPRSS7	Tmprss7	TMPRSS7	96.8
ENSG00000187045	TMPRSS6	TMPRSS6	Tmprss6	TMPRSS6	80.3
ENSG00000160183	TMPRSS3	TMPRSS3	Tmprss3	TMPRSS3	74.5
ENSG00000184012	TMPRSS2	TMPRSS2	Tmprss2	TMPRSS2	45.8
ENSG00000137747	TMPRSS13	TMPRSS13	Tmprss13	TMPRSS13	73.4
ENSG00000186452	TMPRSS12	TMPRSS12	Tmprss12	TMPRSS12	60.2
ENSG00000198092	TMPRSS11F	TMPRSS11F	Tmprss11f	TMPRSS11F	83.8
ENSG00000087128	TMPRSS11E	TMPRSS11E	Tmprss11e	TMPRSS11E	74.6
ENSG00000153802	TMPRSS11D	TMPRSS11D	Tmprss11d	TMPRSS11D	45.7
ENSG00000187054	TMPRSS11A	TMPRSS11A	Tmprss11a	TMPRSS11A	93
ENSG00000138594	TMOD3	TMOD3	Tmod3	TMOD3	21.5
ENSG00000182271	TMIGD1	TMIGD1	Tmigd1	TMIGD1	42.9
ENSG00000181585	TMIE	TMIE	Tmie	TMIE	68
ENSG00000144747	TMF1	TMF1	Tmf1	TMF1	80.6
ENSG00000175348	TMEM9B	TMEM9B	Tmem9b	TMEM9B	17.2
ENSG00000006042	TMEM98	TMEM98	Tmem98	TMEM98	49.9
ENSG00000109084	TMEM97	TMEM97	Tmem97	TMEM97	50
ENSG00000182896	TMEM95	TMEM95	Tmem95	TMEM95	63.1
ENSG00000167105	TMEM92	TMEM92	Tmem92	TMEM92	41.6
ENSG00000142046	TMEM91	TMEM91	Tmem91	TMEM91	32.2
ENSG00000116857	TMEM9	TMEM9	Tmem9	TMEM9	35.8
ENSG00000137103	TMEM8B	TMEM8B	Tmem8b	TMEM8B	63.7
ENSG00000183396	TMEM89	TMEM89	Tmem89	TMEM89	24.3
ENSG00000167874	TMEM88	TMEM88	Tmem88	TMEM88	34.1
ENSG00000153214	TMEM87B	TMEM87B	Tmem87b	TMEM87B	86.4
ENSG00000151117	TMEM86A	TMEM86A	Tmem86a	TMEM86A	49.2
ENSG00000162460	TMEM82	TMEM82	Tmem82	TMEM82	77.5
ENSG00000177042	TMEM80	TMEM80	Tmem80	TMEM80	73.9
ENSG00000163472	TMEM79	TMEM79	Tmem79	TMEM79	84.3
ENSG00000125895	TMEM74B	TMEM74B	Tmem74b	TMEM74B	63.1
ENSG00000164841	TMEM74	TMEM74	Tmem74	TMEM74	68.4
ENSG00000187783	TMEM72	TMEM72	Tmem72	TMEM72	30.1
ENSG00000165071	TMEM71	TMEM71	Tmem71	TMEM71	91.9
ENSG00000175606	TMEM70	TMEM70	Tmem70	TMEM70	60
ENSG00000167904	TMEM68	TMEM68	Tmem68	TMEM68	52.5
ENSG00000164953	TMEM67	TMEM67	Tmem67	TMEM67	98
ENSG00000164983	TMEM65	TMEM65	Tmem65	TMEM65	27.6
ENSG00000180694	TMEM64	TMEM64	Tmem64	TMEM64	40.3
ENSG00000165548	TMEM63C	TMEM63C	Tmem63c	TMEM63C	10.3
ENSG00000137216	TMEM63B	TMEM63B	Tmem63b	TMEM63B	4.1
ENSG00000137842	TMEM62	TMEM62	Tmem62	TMEM62	86.7
ENSG00000121900	TMEM54	TMEM54	Tmem54	TMEM54	40
ENSG00000126106	TMEM53	TMEM53	Tmem53	TMEM53	48.5
ENSG00000165685	TMEM52B	TMEM52B	Tmem52b	TMEM52B	48.3
ENSG00000171729	TMEM51	TMEM51	Tmem51	TMEM51	19
ENSG00000142188	TMEM50B	TMEM50B	Tmem50b	TMEM50B	35.8
ENSG00000183726	TMEM50A	TMEM50A	Tmem50a	TMEM50A	34.8
ENSG00000147027	TMEM47	TMEM47	Tmem47	TMEM47	26.3
ENSG00000151715	TMEM45B	TMEM45B	Tmem45b	TMEM45B	82.7
ENSG00000145014	TMEM44	TMEM44	Tmem44	TMEM44	82.3
ENSG00000170876	TMEM43	TMEM43	Tmem43	TMEM43	86.1
ENSG00000166471	TMEM41B	TMEM41B	Tmem41b	TMEM41B	51.6
ENSG00000088726	TMEM40	TMEM40	Tmem40	TMEM40	71
ENSG00000121775	TMEM39B	TMEM39B	Tmem39b	TMEM39B	51.3
ENSG00000176142	TMEM39A	TMEM39A	Tmem39a	TMEM39A	11.8
ENSG00000072954	TMEM38A	TMEM38A	Tmem38a	TMEM38A	49.5
ENSG00000171227	TMEM37	TMEM37	Tmem37	TMEM37	48
ENSG00000109133	TMEM33	TMEM33	Tmem33	TMEM33	37.7
ENSG00000112697	TMEM30A	TMEM30A	Tmem30a	TMEM30A	48.2
ENSG00000204161	TMEM273	TMEM273	Tmem273	TMEM273	47.6
ENSG00000175877	TMEM270	TMEM270	Tmem270	TMEM270	81.8
ENSG00000157693	TMEM268	TMEM268	Tmem268	TMEM268	67.4
ENSG00000070269	TMEM260	TMEM260	Tmem260	TMEM260	94.5
ENSG00000196932	TMEM26	TMEM26	Tmem26	TMEM26	85.4
ENSG00000182087	TMEM259	TMEM259	Tmem259	TMEM259	17.8
ENSG00000134825	TMEM258	TMEM258	Tmem258	TMEM258	65.3
ENSG00000184497	TMEM255B	TMEM255B	Tmem255b	TMEM255B	91.9
ENSG00000125355	TMEM255A	TMEM255A	Tmem255a	TMEM255A	30.9
ENSG00000181778	TMEM252	TMEM252	Tmem252	TMEM252	59.5
ENSG00000149582	TMEM25	TMEM25	Tmem25	TMEM25	67.6
ENSG00000106609	TMEM248	TMEM248	Tmem248	TMEM248	32.2
ENSG00000106771	TMEM245	TMEM245	Tmem245	TMEM245	68.1
ENSG00000135185	TMEM243	TMEM243	Tmem243	TMEM243	77.4
ENSG00000215712	TMEM242	TMEM242	Tmem242	TMEM242	69.9
ENSG00000134490	TMEM241	TMEM241	Tmem241	TMEM241	72.7
ENSG00000155755	TMEM237	TMEM237	Tmem237	TMEM237	91.2
ENSG00000187824	TMEM220	TMEM220	Tmem220	TMEM220	81.3
ENSG00000149932	TMEM219	TMEM219	Tmem219	TMEM219	64.6
ENSG00000150433	TMEM218	TMEM218	Tmem218	TMEM218	63
ENSG00000172738	TMEM217	TMEM217	Tmem217	TMEM217	58.1
ENSG00000188133	TMEM215	TMEM215	Tmem215	TMEM215	55.8
ENSG00000214128	TMEM213	TMEM213	Tmem213	TMEM213	47.5
ENSG00000185863	TMEM210	TMEM210	Tmem210	TMEM210	35.3
ENSG00000146842	TMEM209	TMEM209	Tmem209	TMEM209	57.9
ENSG00000168701	TMEM208	TMEM208	Tmem208	TMEM208	32.2
ENSG00000198398	TMEM207	TMEM207	Tmem207	TMEM207	69.9
ENSG00000105518	TMEM205	TMEM205	Tmem205	TMEM205	32.9
ENSG00000131634	TMEM204	TMEM204	Tmem204	TMEM204	17.7
ENSG00000187713	TMEM203	TMEM203	Tmem203	TMEM203	29.9
ENSG00000188807	TMEM201	TMEM201	Tmem201	TMEM201	20.2
ENSG00000253304	TMEM200B	TMEM200B	Tmem200b	TMEM200B	40.4
ENSG00000164484	TMEM200A	TMEM200A	Tmem200a	TMEM200A	20.5
ENSG00000244045	TMEM199	TMEM199	Tmem199	TMEM199	66.2
ENSG00000188760	TMEM198	TMEM198	Tmem198	TMEM198	45.9
ENSG00000170088	TMEM192	TMEM192	Tmem192	TMEM192	58.4
ENSG00000160472	TMEM190	TMEM190	Tmem190	TMEM190	45.9
ENSG00000139291	TMEM19	TMEM19	Tmem19	TMEM19	63.5
ENSG00000184857	TMEM186	TMEM186	Tmem186	TMEM186	63.3
ENSG00000226479	TMEM185B	TMEM185B	Tmem185b	TMEM185B	30.1
ENSG00000269556	TMEM185A	TMEM185A	Tmem185a	TMEM185A	48.3
ENSG00000164168	TMEM184C	TMEM184C	Tmem184c	TMEM184C	52.3
ENSG00000163444	TMEM183A	TMEM183A	Tmem183a	TMEM183A	14.9
ENSG00000170417	TMEM182	TMEM182	Tmem182	TMEM182	52.8
ENSG00000146433	TMEM181	TMEM181	Tmem181a	TMEM181	30.9
ENSG00000151353	TMEM18	TMEM18	Tmem18	TMEM18	46.6
ENSG00000258986	TMEM179	TMEM179	Tmem179	TMEM179	36.2
ENSG00000152154	TMEM178A	TMEM178A	Tmem178	TMEM178A	14.6
ENSG00000144120	TMEM177	TMEM177	Tmem177	TMEM177	32
ENSG00000106565	TMEM176B	TMEM176B	Tmem176b	TMEM176B	90.1
ENSG00000002933	TMEM176A	TMEM176A	Tmem176a	TMEM176A	32.8
ENSG00000127419	TMEM175	TMEM175	Tmem175	TMEM175	67.4
ENSG00000164325	TMEM174	TMEM174	Tmem174	TMEM174	53.1
ENSG00000157111	TMEM171	TMEM171	Tmem171	TMEM171	70.4
ENSG00000205269	TMEM170B	TMEM170B	Tmem170b	TMEM170B	25.4
ENSG00000186889	TMEM17	TMEM17	Tmem17	TMEM17	59
ENSG00000163449	TMEM169	TMEM169	Tmem169	TMEM169	54.3
ENSG00000146802	TMEM168	TMEM168	Tmem168	TMEM168	53.7
ENSG00000134851	TMEM165	TMEM165	Tmem165	TMEM165	15.3
ENSG00000157600	TMEM164	TMEM164	Tmem164	TMEM164	18.7
ENSG00000152128	TMEM163	TMEM163	Tmem163	TMEM163	45.3
ENSG00000164180	TMEM161B	TMEM161B	Tmem161b	TMEM161B	59.4
ENSG00000064545	TMEM161A	TMEM161A	Tmem161a	TMEM161A	81.3
ENSG00000249992	TMEM158	TMEM158	Tmem158	TMEM158	33.2
ENSG00000121895	TMEM156	TMEM156	Tmem156	TMEM156	89.5
ENSG00000249242	TMEM150C	TMEM150C	Tmem150c	TMEM150C	54.4
ENSG00000180061	TMEM150B	TMEM150B	Tmem150b	TMEM150B	79.7
ENSG00000168890	TMEM150A	TMEM150A	Tmem150a	TMEM150A	40.8
ENSG00000167619	TMEM145	TMEM145	Tmem145	TMEM145	72.5
ENSG00000164124	TMEM144	TMEM144	Tmem144	TMEM144	86.4
ENSG00000244187	TMEM141	TMEM141	Tmem141	TMEM141	43.2
ENSG00000146859	TMEM140	TMEM140	Tmem140	TMEM140	48.3
ENSG00000149483	TMEM138	TMEM138	Tmem138	TMEM138	29.1
ENSG00000166575	TMEM135	TMEM135	Tmem135	TMEM135	18.6
ENSG00000181291	TMEM132E	TMEM132E	Tmem132e	TMEM132E	75.8
ENSG00000151952	TMEM132D	TMEM132D	Tmem132d	TMEM132D	5.9
ENSG00000181234	TMEM132C	TMEM132C	Tmem132c	TMEM132C	25.6
ENSG00000139364	TMEM132B	TMEM132B	Tmem132b	TMEM132B	31.2
ENSG00000121210	TMEM131L	TMEM131L	Tmem131l	TMEM131L	5.4
ENSG00000075568	TMEM131	TMEM131	Tmem131	TMEM131	1.5
ENSG00000166448	TMEM130	TMEM130	Tmem130	TMEM130	88.6
ENSG00000168936	TMEM129	TMEM129	Tmem129	TMEM129	81.8
ENSG00000132406	TMEM128	TMEM128	Tmem128	TMEM128	42.6
ENSG00000135956	TMEM127	TMEM127	Tmem127	TMEM127	43
ENSG00000171202	TMEM126A	TMEM126A	Tmem126a	TMEM126A	58.2
ENSG00000179178	TMEM125	TMEM125	Tmem125	TMEM125	67.5
ENSG00000188735	TMEM120B	TMEM120B	Tmem120b	TMEM120B	36.7
ENSG00000183160	TMEM119	TMEM119	Tmem119	TMEM119	55.1
ENSG00000139173	TMEM117	TMEM117	Tmem117	TMEM117	74.8
ENSG00000198270	TMEM116	TMEM116	Tmem116	TMEM116	91
ENSG00000178307	TMEM11	TMEM11	Tmem11	TMEM11	22.2
ENSG00000110108	TMEM109	TMEM109	Tmem109	TMEM109	46.8
ENSG00000144868	TMEM108	TMEM108	Tmem108	TMEM108	11.1
ENSG00000179029	TMEM107	TMEM107	Tmem107	TMEM107	49.9
ENSG00000134291	TMEM106C	TMEM106C	Tmem106c	TMEM106C	80
ENSG00000106460	TMEM106B	TMEM106B	Tmem106b	TMEM106B	29.6
ENSG00000184988	TMEM106A	TMEM106A	Tmem106a	TMEM106A	68.4
ENSG00000109066	TMEM104	TMEM104	Tmem104	TMEM104	75.3
ENSG00000091947	TMEM101	TMEM101	Tmem101	TMEM101	40.1
ENSG00000166292	TMEM100	TMEM100	Tmem100	TMEM100	30.4
ENSG00000144339	TMEFF2	TMEFF2	Tmeff2	TMEFF2	33.1
ENSG00000184840	TMED9	TMED9	Tmed9	TMED9	40.2
ENSG00000100580	TMED8	TMED8	Tmed8	TMED8	44.1
ENSG00000117500	TMED5	TMED5	Tmed5	TMED5	61.2
ENSG00000158604	TMED4	TMED4	Tmed4	TMED4	35.9
ENSG00000166557	TMED3	TMED3	Tmed3	TMED3	60.9
ENSG00000170348	TMED10	TMED10	Tmed10	TMED10	24.1
ENSG00000099203	TMED1	TMED1	Tmed1	TMED1	70.4
ENSG00000113119	TMCO6	TMCO6	Tmco6	TMCO6	78.6
ENSG00000166069	TMCO5A	TMCO5A	Tmco5	TMCO5A	67.6
ENSG00000162542	TMCO4	TMCO4	Tmco4	TMCO4	95.3
ENSG00000150403	TMCO3	TMCO3	Tmco3	TMCO3	91.4
ENSG00000188800	TMCO2	TMCO2	Tmco2	TMCO2	48.4
ENSG00000143183	TMCO1	TMCO1	Tmco1	TMCO1	82.6
ENSG00000057704	TMCC3	TMCC3	Tmcc3	TMCC3	67.8
ENSG00000133069	TMCC2	TMCC2	Tmcc2	TMCC2	36
ENSG00000172765	TMCC1	TMCC1	Tmcc1	TMCC1	38.5
ENSG00000167895	TMC8	TMC8	Tmc8	TMC8	94.6
ENSG00000170537	TMC7	TMC7	Tmc7	TMC7	79.8
ENSG00000141524	TMC6	TMC6	Tmc6	TMC6	86.9
ENSG00000103534	TMC5	TMC5	Tmc5	TMC5	69.8
ENSG00000167608	TMC4	TMC4	Tmc4	TMC4	89
ENSG00000188869	TMC3	TMC3	Tmc3	TMC3	97.3
ENSG00000149488	TMC2	TMC2	Tmc2	TMC2	97.3
ENSG00000135926	TMBIM1	TMBIM1	Tmbim1	TMBIM1	72.8
ENSG00000101337	TM9SF4	TM9SF4	Tm9sf4	TM9SF4	3
ENSG00000077147	TM9SF3	TM9SF3	Tm9sf3	TM9SF3	4.8
ENSG00000125304	TM9SF2	TM9SF2	Tm9sf2	TM9SF2	3.5
ENSG00000064115	TM7SF3	TM7SF3	Tm7sf3	TM7SF3	43.8
ENSG00000213996	TM6SF2	TM6SF2	Tm6sf2	TM6SF2	76.3
ENSG00000136404	TM6SF1	TM6SF1	Tm6sf1	TM6SF1	73.2
ENSG00000142484	TM4SF5	TM4SF5	Tm4sf5	TM4SF5	77.5
ENSG00000169903	TM4SF4	TM4SF4	Tm4sf4	TM4SF4	61.1
ENSG00000168955	TM4SF20	TM4SF20	Tm4sf20	TM4SF20	81.1
ENSG00000184277	TM2D3	TM2D3	Tm2d3	TM2D3	68.3
ENSG00000169490	TM2D2	TM2D2	Tm2d2	TM2D2	45
ENSG00000162604	TM2D1	TM2D1	Tm2d1	TM2D1	48
ENSG00000164438	TLX3	TLX3	Tlx3	TLX3	35.7
ENSG00000107807	TLX1	TLX1	Tlx1	TLX1	31.1
ENSG00000196664	TLR7	TLR7	Tlr7	TLR7	18.9
ENSG00000174130	TLR6	TLR6	Tlr6	TLR6	56.4
ENSG00000187554	TLR5	TLR5	Tlr5	TLR5	89.5
ENSG00000136869	TLR4	TLR4	Tlr4	TLR4	79.9
ENSG00000164342	TLR3	TLR3	Tlr3	TLR3	64
ENSG00000137462	TLR2	TLR2	Tlr2	TLR2	72.1
ENSG00000171914	TLN2	TLN2	Tln2	TLN2	4.1
ENSG00000137076	TLN1	TLN1	Tln1	TLN1	0.3
ENSG00000095587	TLL2	TLL2	Tll2	TLL2	98.5
ENSG00000038295	TLL1	TLL1	Tll1	TLL1	34.9
ENSG00000146872	TLK2	TLK2	Tlk2	TLK2	1.2
ENSG00000198586	TLK1	TLK1	Tlk1	TLK1	2.3
ENSG00000104953	TLE6	TLE6	Tle6	TLE6	64.7
ENSG00000106829	TLE4	TLE4	Tle4	TLE4	3.6
ENSG00000140332	TLE3	TLE3	Tle3	TLE3	3.7
ENSG00000065717	TLE2	TLE2	Tle2	TLE2	65.6
ENSG00000196781	TLE1	TLE1	Tle1	TLE1	14.2
ENSG00000101342	TLDC2	TLDC2	Tldc2	TLDC2	42.5
ENSG00000181264	TLCD5	TLCD5	Tlcd5	TLCD5	49
ENSG00000149926	TLCD3B	TLCD3B	Tlcd3b	TLCD3B	36.1
ENSG00000167695	TLCD3A	TLCD3A	Tlcd3a	TLCD3A	51.4
ENSG00000160606	TLCD1	TLCD1	Tlcd1	TLCD1	54.5
ENSG00000007350	TKTL1	TKTL1	Tktl1	TKTL1	7.5
ENSG00000163931	TKT	TKT	Tkt	TKT	46
ENSG00000166548	TK2	TK2	Tk2	TK2	60
ENSG00000167900	TK1	TK1	Tk1	TK1	36.9
ENSG00000137221	TJAP1	TJAP1	Tjap1	TJAP1	64.5
ENSG00000143155	TIPRL	TIPRL	Tiprl	TIPRL	19.2
ENSG00000075131	TIPIN	TIPIN	Tipin	TIPIN	55
ENSG00000163659	TIPARP	TIPARP	Tiparp	TIPARP	7.1
ENSG00000092330	TINF2	TINF2	Tinf2	TINF2	40.2
ENSG00000142910	TINAGL1	TINAGL1	Tinagl1	TINAGL1	37.2
ENSG00000157150	TIMP4	TIMP4	Timp4	TIMP4	59.6
ENSG00000100234	TIMP3	TIMP3	Timp3	TIMP3	42.5
ENSG00000035862	TIMP2	TIMP2	Timp2	TIMP2	29.2
ENSG00000113845	TIMMDC1	TIMMDC1	Timmdc1	TIMMDC1	83.5
ENSG00000150779	TIMM8B	TIMM8B	Timm8b	TIMM8B	37.8
ENSG00000104980	TIMM44	TIMM44	Timm44	TIMM44	21
ENSG00000142444	TIMM29	TIMM29	Timm29	TIMM29	61.9
ENSG00000177370	TIMM22	TIMM22	Timm22	TIMM22	59.5
ENSG00000075336	TIMM21	TIMM21	Timm21	TIMM21	57.8
ENSG00000126768	TIMM17B	TIMM17B	Timm17b	TIMM17B	20.7
ENSG00000134375	TIMM17A	TIMM17A	Timm17a	TIMM17A	37.3
ENSG00000111602	TIMELESS	TIMELESS	Timeless	TIMELESS	99.4
ENSG00000145850	TIMD4	TIMD4	Timd4	TIMD4	87.2
ENSG00000181847	TIGIT	TIGIT	Tigit	TIGIT	47.6
ENSG00000173825	TIGD3	TIGD3	Tigd3	TIGD3	93.1
ENSG00000180346	TIGD2	TIGD2	Tigd2	TIGD2	78.9
ENSG00000255833	TIFAB	TIFAB	Tifab	TIFAB	82.4
ENSG00000145365	TIFA	TIFA	Tifa	TIFA	42.2
ENSG00000066056	TIE1	TIE1	Tie1	TIE1	94.3
ENSG00000140534	TICRR	TICRR	Ticrr	TICRR	94.3
ENSG00000146426	TIAM2	TIAM2	Tiam2	TIAM2	41.8
ENSG00000151923	TIAL1	TIAL1	Tial1	TIAL1	6.1
ENSG00000116001	TIA1	TIA1	Tia1	TIA1	20.5
ENSG00000151500	THYN1	THYN1	Thyn1	THYN1	90.9
ENSG00000154096	THY1	THY1	Thy1	THY1	40
ENSG00000134077	THUMPD3	THUMPD3	Thumpd3	THUMPD3	93.5
ENSG00000138050	THUMPD2	THUMPD2	Thumpd2	THUMPD2	88.2
ENSG00000066654	THUMPD1	THUMPD1	Thumpd1	THUMPD1	64.6
ENSG00000259431	THTPA	THTPA	Thtpa	THTPA	71.4
ENSG00000144229	THSD7B	THSD7B	Thsd7b	THSD7B	79.3
ENSG00000005108	THSD7A	THSD7A	Thsd7a	THSD7A	5.6
ENSG00000187720	THSD4	THSD4	Thsd4	THSD4	62.3
ENSG00000136114	THSD1	THSD1	Thsd1	THSD1	75.7
ENSG00000151365	THRSP	THRSP	Thrsp	THRSP	57.6
ENSG00000151090	THRB	THRB	Thrb	THRB	8.6
ENSG00000054118	THRAP3	THRAP3	Thrap3	THRAP3	2.1
ENSG00000126351	THRA	THRA	Thra	THRA	39.9
ENSG00000090534	THPO	THPO	Thpo	THPO	58
ENSG00000172009	THOP1	THOP1	Thop1	THOP1	50.8
ENSG00000163634	THOC7	THOC7	Thoc7	THOC7	12
ENSG00000131652	THOC6	THOC6	Thoc6	THOC6	61.5
ENSG00000100296	THOC5	THOC5	Thoc5	THOC5	67.3
ENSG00000079134	THOC1	THOC1	Thoc1	THOC1	19
ENSG00000144115	THNSL2	THNSL2	Thnsl2	THNSL2	80
ENSG00000185875	THNSL1	THNSL1	Thnsl1	THNSL1	94.6
ENSG00000113272	THG1L	THG1L	Thg1l	THG1L	74.8
ENSG00000130775	THEMIS2	THEMIS2	Themis2	THEMIS2	45.5
ENSG00000172673	THEMIS	THEMIS	Themis	THEMIS	40.9
ENSG00000130193	THEM6	THEM6	Them6	THEM6	50.6
ENSG00000159445	THEM4	THEM4	Them4	THEM4	69.2
ENSG00000113296	THBS4	THBS4	Thbs4	THBS4	88.3
ENSG00000169231	THBS3	THBS3	Thbs3	THBS3	88.7
ENSG00000186340	THBS2	THBS2	Thbs2	THBS2	37.3
ENSG00000137801	THBS1	THBS1	Thbs1	THBS1	5.8
ENSG00000184436	THAP7	THAP7	Thap7	THAP7	49.8
ENSG00000176946	THAP4	THAP4	Thap4	THAP4	42.3
ENSG00000041988	THAP3	THAP3	Thap3	THAP3	63.1
ENSG00000168286	THAP11	THAP11	Thap11	THAP11	31
ENSG00000131931	THAP1	THAP1	Thap1	THAP1	17.8
ENSG00000115970	THADA	THADA	Thada	THADA	99.6
ENSG00000180176	TH	TH	Th	TH	59
ENSG00000137574	TGS1	TGS1	Tgs1	TGS1	86.1
ENSG00000159495	TGM7	TGM7	Tgm7	TGM7	91.5
ENSG00000166948	TGM6	TGM6	Tgm6	TGM6	98.2
ENSG00000104055	TGM5	TGM5	Tgm5	TGM5	97.4
ENSG00000198959	TGM2	TGM2	Tgm2	TGM2	96.3
ENSG00000092295	TGM1	TGM1	Tgm1	TGM1	83.6
ENSG00000177426	TGIF1	TGIF1	Tgif1	TGIF1	43.7
ENSG00000135966	TGFBRAP1	TGFBRAP1	Tgfbrap1	TGFBRAP1	41.6
ENSG00000069702	TGFBR3	TGFBR3	Tgfbr3	TGFBR3	54.5
ENSG00000163513	TGFBR2	TGFBR2	Tgfbr2	TGFBR2	48.9
ENSG00000106799	TGFBR1	TGFBR1	Tgfbr1	TGFBR1	14.9
ENSG00000120708	TGFBI	TGFBI	Tgfbi	TGFBI	59.3
ENSG00000119699	TGFB3	TGFB3	Tgfb3	TGFB3	16.5
ENSG00000092969	TGFB2	TGFB2	Tgfb2	TGFB2	10.1
ENSG00000105329	TGFB1	TGFB1	Tgfb1	TGFB1	34.1
ENSG00000088451	TGDS	TGDS	Tgds	TGDS	78.4
ENSG00000072274	TFRC	TFRC	Tfrc	TFRC	22.3
ENSG00000106327	TFR2	TFR2	Tfr2	TFR2	70.9
ENSG00000105619	TFPT	TFPT	Tfpt	TFPT	69.9
ENSG00000105825	TFPI2	TFPI2	Tfpi2	TFPI2	37.5
ENSG00000003436	TFPI	TFPI	Tfpi	TFPI	50.4
ENSG00000100109	TFIP11	TFIP11	Tfip11	TFIP11	81.3
ENSG00000160180	TFF3	TFF3	Tff3	TFF3	44.1
ENSG00000160181	TFF2	TFF2	Tff2	TFF2	70.8
ENSG00000160182	TFF1	TFF1	Tff1	TFF1	57
ENSG00000105967	TFEC	TFEC	Tfec	TFEC	74
ENSG00000112561	TFEB	TFEB	Tfeb	TFEB	13.1
ENSG00000068323	TFE3	TFE3	Tfe3	TFE3	12.6
ENSG00000114126	TFDP2	TFDP2	Tfdp2	TFDP2	12.4
ENSG00000115112	TFCP2L1	TFCP2L1	Tfcp2l1	TFCP2L1	5.7
ENSG00000135457	TFCP2	TFCP2	Tfcp2	TFCP2	71.8
ENSG00000029639	TFB1M	TFB1M	Tfb1m	TFB1M	77.7
ENSG00000090447	TFAP4	TFAP4	Tfap4	TFAP4	12
ENSG00000116819	TFAP2E	TFAP2E	Tfap2e	TFAP2E	64.8
ENSG00000008197	TFAP2D	TFAP2D	Tfap2d	TFAP2D	11.5
ENSG00000087510	TFAP2C	TFAP2C	Tfap2c	TFAP2C	15.6
ENSG00000008196	TFAP2B	TFAP2B	Tfap2b	TFAP2B	9.7
ENSG00000137203	TFAP2A	TFAP2A	Tfap2a	TFAP2A	10.5
ENSG00000108064	TFAM	TFAM	Tfam	TFAM	22.4
ENSG00000151575	TEX9	TEX9	Tex9	TEX9	97.9
ENSG00000164645	TEX47	TEX47	Tex47	TEX47	50.8
ENSG00000240021	TEX35	TEX35	Tex35	TEX35	62.6
ENSG00000153495	TEX29	TEX29	Tex29	TEX29	63.2
ENSG00000175664	TEX26	TEX26	Tex26	TEX26	89.1
ENSG00000136478	TEX2	TEX2	Tex2	TEX2	31.7
ENSG00000133863	TEX15	TEX15	Tex15	TEX15	97.9
ENSG00000121101	TEX14	TEX14	Tex14	TEX14	99.1
ENSG00000150783	TEX12	TEX12	Tex12	TEX12	41.4
ENSG00000120498	TEX11	TEX11	Tex11	TEX11	3.1
ENSG00000131126	TEX101	TEX101	Tex101	TEX101	65.1
ENSG00000187605	TET3	TET3	Tet3	TET3	3.4
ENSG00000168769	TET2	TET2	Tet2	TET2	99.4
ENSG00000138336	TET1	TET1	Tet1	TET1	5
ENSG00000135426	TESPA1	TESPA1	Tespa1	TESPA1	76.3
ENSG00000070759	TESK2	TESK2	Tesk2	TESK2	78.4
ENSG00000107140	TESK1	TESK1	Tesk1	TESK1	5.9
ENSG00000088992	TESC	TESC	Tescl	TESC	24.8
ENSG00000164362	TERT	TERT	Tert	TERT	19.2
ENSG00000166848	TERF2IP	TERF2IP	Terf2ip	TERF2IP	51
ENSG00000132604	TERF2	TERF2	Terf2	TERF2	16.3
ENSG00000147601	TERF1	TERF1	Terf1	TERF1	18.7
ENSG00000129566	TEP1	TEP1	Tep1	TEP1	99.2
ENSG00000174016	TENT5D	TENT5D	Tent5d	TENT5D	25.3
ENSG00000183508	TENT5C	TENT5C	Tent5c	TENT5C	29.3
ENSG00000158246	TENT5B	TENT5B	Tent5b	TENT5B	46.9
ENSG00000112773	TENT5A	TENT5A	Tent5a	TENT5A	34.3
ENSG00000112941	TENT4A	TENT4A	Tent4a	TENT4A	6.6
ENSG00000164329	TENT2	TENT2	Tent2	TENT2	64.9
ENSG00000145934	TENM2	TENM2	Tenm2	TENM2	3.2
ENSG00000009694	TENM1	TENM1	Tenm1	TENM1	2.2
ENSG00000100726	TELO2	TELO2	Telo2	TELO2	83.8
ENSG00000153060	TEKT5	TEKT5	Tekt5	TEKT5	96.7
ENSG00000125409	TEKT3	TEKT3	Tekt3	TEKT3	96.4
ENSG00000092850	TEKT2	TEKT2	Tekt2	TEKT2	89.6
ENSG00000167858	TEKT1	TEKT1	Tekt1	TEKT1	71.6
ENSG00000120156	TEK	TEK	Tek	TEK	2.4
ENSG00000172171	TEFM	TEFM	Tefm	TEFM	47.8
ENSG00000167074	TEF	TEF	Tef	TEF	32.2
ENSG00000119913	TECTB	TECTB	Tectb	TECTB	89.4
ENSG00000109927	TECTA	TECTA	Tecta	TECTA	95.2
ENSG00000205678	TECRL	TECRL	Tecrl	TECRL	91.5
ENSG00000196663	TECPR2	TECPR2	Tecpr2	TECPR2	14.9
ENSG00000074219	TEAD2	TEAD2	Tead2	TEAD2	61.8
ENSG00000180190	TDRP	TDRP	Tdrp	TDRP	63.6
ENSG00000182134	TDRKH	TDRKH	Tdrkh	TDRKH	56.6
ENSG00000156414	TDRD9	TDRD9	Tdrd9	TDRD9	84.1
ENSG00000196116	TDRD7	TDRD7	Tdrd7	TDRD7	74.2
ENSG00000180113	TDRD6	TDRD6	Tdrd6	TDRD6	99.1
ENSG00000162782	TDRD5	TDRD5	Tdrd5	TDRD5	12.3
ENSG00000083544	TDRD3	TDRD3	Tdrd3	TDRD3	69.7
ENSG00000095627	TDRD1	TDRD1	Tdrd1	TDRD1	4.4
ENSG00000111802	TDP2	TDP2	Tdp2	TDP2	70.9
ENSG00000042088	TDP1	TDP1	Tdp1	TDP1	94.2
ENSG00000151790	TDO2	TDO2	Tdo2	TDO2	88.4
ENSG00000139372	TDG	TDG	Tdg	TDG	65
ENSG00000119977	TCTN3	TCTN3	Tctn3	TCTN3	86.7
ENSG00000204852	TCTN1	TCTN1	Tctn1	TCTN1	90.6
ENSG00000145022	TCTA	TCTA	Tcta	TCTA	53.8
ENSG00000166046	TCP11L2	TCP11L2	Tcp11l2	TCP11L2	83.1
ENSG00000176148	TCP11L1	TCP11L1	Tcp11l1	TCP11L1	43.9
ENSG00000124678	TCP11	TCP11	Tcp11	TCP11	74.5
ENSG00000120438	TCP1	TCP1	Tcp1	TCP1	10.1
ENSG00000070814	TCOF1	TCOF1	Tcof1	TCOF1	22.7
ENSG00000185339	TCN2	TCN2	Tcn2	TCN2	51.1
ENSG00000100721	TCL1A	TCL1A	Tcl1	TCL1A	63.9
ENSG00000110719	TCIRG1	TCIRG1	Tcirg1	TCIRG1	79.2
ENSG00000176907	TCIM	TCIM	Tcim	TCIM	45.5
ENSG00000182898	TCHHL1	TCHHL1	Tchhl1	TCHHL1	88
ENSG00000148737	TCF7L2	TCF7L2	Tcf7l2	TCF7L2	10
ENSG00000196628	TCF4	TCF4	Tcf4	TCF4	4
ENSG00000071564	TCF3	TCF3	Tcf3	TCF3	39.1
ENSG00000141002	TCF25	TCF25	Tcf25	TCF25	46.8
ENSG00000163792	TCF23	TCF23	Tcf23	TCF23	67
ENSG00000118526	TCF21	TCF21	Tcf21	TCF21	21.4
ENSG00000137310	TCF19	TCF19	Tcf19	TCF19	69.3
ENSG00000125878	TCF15	TCF15	Tcf15	TCF15	28.6
ENSG00000140262	TCF12	TCF12	Tcf12	TCF12	12.5
ENSG00000113649	TCERG1	TCERG1	Tcerg1	TCERG1	3.1
ENSG00000116205	TCEANC2	TCEANC2	Tceanc2	TCEANC2	75.4
ENSG00000182916	TCEAL7	TCEAL7	Tceal7	TCEAL7	31.4
ENSG00000172465	TCEAL1	TCEAL1	Tceal1	TCEAL1	30.3
ENSG00000204219	TCEA3	TCEA3	Tcea3	TCEA3	64.9
ENSG00000187735	TCEA1	TCEA1	Tcea1	TCEA1	34.5
ENSG00000179152	TCAIM	TCAIM	Tcaim	TCAIM	74.2
ENSG00000165929	TC2N	TC2N	Tc2n	TC2N	54.1
ENSG00000164458	TBXT	TBXT	T	TBXT	69.7
ENSG00000059377	TBXAS1	TBXAS1	Tbxas1	TBXAS1	88.5
ENSG00000149922	TBX6	TBX6	Tbx6	TBX6	49.8
ENSG00000089225	TBX5	TBX5	Tbx5	TBX5	9.5
ENSG00000121075	TBX4	TBX4	Tbx4	TBX4	32.6
ENSG00000135111	TBX3	TBX3	Tbx3	TBX3	14.8
ENSG00000122145	TBX22	TBX22	Tbx22	TBX22	12.4
ENSG00000073861	TBX21	TBX21	Tbx21	TBX21	13.7
ENSG00000164532	TBX20	TBX20	Tbx20	TBX20	34.7
ENSG00000121068	TBX2	TBX2	Tbx2	TBX2	13.6
ENSG00000143178	TBX19	TBX19	Tbx19	TBX19	75.4
ENSG00000112837	TBX18	TBX18	Tbx18	TBX18	7.3
ENSG00000092607	TBX15	TBX15	Tbx15	TBX15	18.7
ENSG00000184058	TBX1	TBX1	Tbx1	TBX1	11.2
ENSG00000136270	TBRG4	TBRG4	Tbrg4	TBRG4	22.2
ENSG00000154144	TBRG1	TBRG1	Tbrg1	TBRG1	72.6
ENSG00000182521	TBPL2	TBPL2	Tbpl2	TBPL2	87
ENSG00000028839	TBPL1	TBPL1	Tbpl1	TBPL1	18.6
ENSG00000183751	TBL3	TBL3	Tbl3	TBL3	81.9
ENSG00000106638	TBL2	TBL2	Tbl2	TBL2	58.7
ENSG00000177565	TBL1XR1	TBL1XR1	Tbl1xr1	TBL1XR1	6.1
ENSG00000198933	TBKBP1	TBKBP1	Tbkbp1	TBKBP1	48.5
ENSG00000183735	TBK1	TBK1	Tbk1	TBK1	8.4
ENSG00000145348	TBCK	TBCK	Tbck	TBCK	80.4
ENSG00000141556	TBCD	TBCD	Tbcd	TBCD	72.9
ENSG00000113838	TBCCD1	TBCCD1	Tbccd1	TBCCD1	54.2
ENSG00000124659	TBCC	TBCC	Tbcc	TBCC	54.5
ENSG00000105254	TBCB	TBCB	Tbcb	TBCB	32.6
ENSG00000171530	TBCA	TBCA	Tbca	TBCA	24.2
ENSG00000197226	TBC1D9B	TBC1D9B	Tbc1d9b	TBC1D9B	85.6
ENSG00000109436	TBC1D9	TBC1D9	Tbc1d9	TBC1D9	18.8
ENSG00000133138	TBC1D8B	TBC1D8B	Tbc1d8b	TBC1D8B	76.4
ENSG00000204634	TBC1D8	TBC1D8	Tbc1d8	TBC1D8	83.6
ENSG00000145979	TBC1D7	TBC1D7	Tbc1d7	TBC1D7	78.5
ENSG00000131374	TBC1D5	TBC1D5	Tbc1d5	TBC1D5	91.5
ENSG00000136111	TBC1D4	TBC1D4	Tbc1d4	TBC1D4	95.7
ENSG00000146350	TBC1D32	TBC1D32	Tbc1d32	TBC1D32	95.1
ENSG00000167202	TBC1D2B	TBC1D2B	Tbc1d2b	TBC1D2B	73.1
ENSG00000068354	TBC1D25	TBC1D25	Tbc1d25	TBC1D25	24.3
ENSG00000036054	TBC1D23	TBC1D23	Tbc1d23	TBC1D23	71.5
ENSG00000065491	TBC1D22B	TBC1D22B	Tbc1d22b	TBC1D22B	57
ENSG00000054611	TBC1D22A	TBC1D22A	Tbc1d22a	TBC1D22A	14.2
ENSG00000167139	TBC1D21	TBC1D21	Tbc1d21	TBC1D21	51.1
ENSG00000125875	TBC1D20	TBC1D20	Tbc1d20	TBC1D20	17.1
ENSG00000095383	TBC1D2	TBC1D2	Tbc1d2	TBC1D2	88
ENSG00000109680	TBC1D19	TBC1D19	Tbc1d19	TBC1D19	52.8
ENSG00000104946	TBC1D17	TBC1D17	Tbc1d17	TBC1D17	95.2
ENSG00000167291	TBC1D16	TBC1D16	Tbc1d16	TBC1D16	57.1
ENSG00000121749	TBC1D15	TBC1D15	Tbc1d15	TBC1D15	40.6
ENSG00000132405	TBC1D14	TBC1D14	Tbc1d14	TBC1D14	17.4
ENSG00000107021	TBC1D13	TBC1D13	Tbc1d13	TBC1D13	27.1
ENSG00000175463	TBC1D10C	TBC1D10C	Tbc1d10c	TBC1D10C	62.8
ENSG00000169221	TBC1D10B	TBC1D10B	Tbc1d10b	TBC1D10B	11.5
ENSG00000166220	TBATA	TBATA	Tbata	TBATA	85.4
ENSG00000213977	TAX1BP3	TAX1BP3	Tax1bp3	TAX1BP3	61.3
ENSG00000106052	TAX1BP1	TAX1BP1	Tax1bp1	TAX1BP1	80.6
ENSG00000203705	TATDN3	TATDN3	Tatdn3	TATDN3	74.1
ENSG00000147687	TATDN1	TATDN1	Tatdn1	TATDN1	88.3
ENSG00000198650	TAT	TAT	Tat	TAT	51.3
ENSG00000089123	TASP1	TASP1	Tasp1	TASP1	14.3
ENSG00000108021	TASOR2	TASOR2	Tasor2	TASOR2	13.5
ENSG00000163946	TASOR	TASOR	Tasor	TASOR	4.7
ENSG00000120280	TASL	TASL	Tasl	TASL	36.9
ENSG00000121377	TAS2R7	TAS2R7	Tas2r130	TAS2R7	50.9
ENSG00000185899	TAS2R60	TAS2R60	Tas2r135	TAS2R60	79.1
ENSG00000221937	TAS2R40	TAS2R40	Tas2r144	TAS2R40	61.1
ENSG00000127364	TAS2R4	TAS2R4	Tas2r108	TAS2R4	47
ENSG00000236398	TAS2R39	TAS2R39	Tas2r139	TAS2R39	86.9
ENSG00000257138	TAS2R38	TAS2R38	Tas2r138	TAS2R38	45.5
ENSG00000127362	TAS2R3	TAS2R3	Tas2r137	TAS2R3	70.8
ENSG00000128519	TAS2R16	TAS2R16	Tas2r118	TAS2R16	53.2
ENSG00000169777	TAS2R1	TAS2R1	Tas2r119	TAS2R1	37.3
ENSG00000179002	TAS1R2	TAS1R2	Tas1r2	TAS1R2	95.4
ENSG00000173662	TAS1R1	TAS1R1	Tas1r1	TAS1R1	89.2
ENSG00000185418	TARS3	TARS3	Tarsl2	TARS3	90.2
ENSG00000143374	TARS2	TARS2	Tars2	TARS2	88.2
ENSG00000113407	TARS1	TARS1	Tars	TARS1	91
ENSG00000120948	TARDBP	TARDBP	Tardbp	TARDBP	11.6
ENSG00000139546	TARBP2	TARBP2	Tarbp2	TARBP2	31.5
ENSG00000169762	TAPT1	TAPT1	Tapt1	TAPT1	28.4
ENSG00000139192	TAPBPL	TAPBPL	Tapbpl	TAPBPL	84.4
ENSG00000231925	TAPBP	TAPBP	Tapbp	TAPBP	67.8
ENSG00000168394	TAP1	TAP1	Tap1	TAP1	36
ENSG00000135090	TAOK3	TAOK3	Taok3	TAOK3	2.9
ENSG00000149930	TAOK2	TAOK2	Taok2	TAOK2	6.2
ENSG00000160551	TAOK1	TAOK1	Taok1	TAOK1	1.3
ENSG00000136560	TANK	TANK	Tank	TANK	15.3
ENSG00000103047	TANGO6	TANGO6	Tango6	TANGO6	88.9
ENSG00000183597	TANGO2	TANGO2	Tango2	TANGO2	79.9
ENSG00000170921	TANC2	TANC2	Tanc2	TANC2	0.9
ENSG00000115183	TANC1	TANC1	Tanc1	TANC1	41.1
ENSG00000161835	TAMALIN	TAMALIN	Tamalin	TAMALIN	16.1
ENSG00000177156	TALDO1	TALDO1	Taldo1	TALDO1	70.2
ENSG00000162367	TAL1	TAL1	Tal1	TAL1	20.8
ENSG00000144834	TAGLN3	TAGLN3	Tagln3	TAGLN3	25
ENSG00000149591	TAGLN	TAGLN	Tagln	TAGLN	37.3
ENSG00000163377	TAFA4	TAFA4	Tafa4	TAFA4	38.8
ENSG00000198673	TAFA2	TAFA2	Tafa2	TAFA2	28.7
ENSG00000187325	TAF9B	TAF9B	Taf9b	TAF9B	67.7
ENSG00000137413	TAF8	TAF8	Taf8	TAF8	90.1
ENSG00000162227	TAF6L	TAF6L	Taf6l	TAF6L	21
ENSG00000106290	TAF6	TAF6	Taf6	TAF6	66.1
ENSG00000148835	TAF5	TAF5	Taf5	TAF5	5
ENSG00000141384	TAF4B	TAF4B	Taf4b	TAF4B	18.6
ENSG00000130699	TAF4	TAF4	Taf4	TAF4	5.2
ENSG00000165632	TAF3	TAF3	Taf3	TAF3	8.4
ENSG00000064313	TAF2	TAF2	Taf2	TAF2	28.3
ENSG00000166012	TAF1D	TAF1D	Taf1d	TAF1D	57.3
ENSG00000103168	TAF1C	TAF1C	Taf1c	TAF1C	93.6
ENSG00000115750	TAF1B	TAF1B	Taf1b	TAF1B	79.8
ENSG00000143498	TAF1A	TAF1A	Taf1a	TAF1A	83.2
ENSG00000197780	TAF13	TAF13	Taf13	TAF13	51.7
ENSG00000120656	TAF12	TAF12	Taf12	TAF12	18.1
ENSG00000171148	TADA3	TADA3	Tada3	TADA3	58.3
ENSG00000152382	TADA1	TADA1	Tada1	TADA1	33.9
ENSG00000169836	TACR3	TACR3	Tacr3	TACR3	81.4
ENSG00000075073	TACR2	TACR2	Tacr2	TACR2	82.5
ENSG00000115353	TACR1	TACR1	Tacr1	TACR1	69.4
ENSG00000136463	TACO1	TACO1	Taco1	TACO1	34
ENSG00000138162	TACC2	TACC2	Tacc2	TACC2	98.5
ENSG00000147526	TACC1	TACC1	Tacc1	TACC1	53.1
ENSG00000166863	TAC3	TAC3	Tac2	TAC3	48.3
ENSG00000006128	TAC1	TAC1	Tac1	TAC1	18.7
ENSG00000157625	TAB3	TAB3	Tab3	TAB3	16.6
ENSG00000055208	TAB2	TAB2	Tab2	TAB2	4.4
ENSG00000100324	TAB1	TAB1	Tab1	TAB1	59.1
ENSG00000135569	TAAR5	TAAR5	Taar5	TAAR5	84.3
ENSG00000146378	TAAR2	TAAR2	Taar2	TAAR2	80.3
ENSG00000146399	TAAR1	TAAR1	Taar1	TAAR1	68.8
ENSG00000198198	SZT2	SZT2	Szt2	SZT2	85.6
ENSG00000147041	SYTL5	SYTL5	Sytl5	SYTL5	45.6
ENSG00000102362	SYTL4	SYTL4	Sytl4	SYTL4	50.6
ENSG00000164674	SYTL3	SYTL3	Sytl3	SYTL3	98
ENSG00000137501	SYTL2	SYTL2	Sytl2	SYTL2	98.5
ENSG00000170743	SYT9	SYT9	Syt9	SYT9	34.8
ENSG00000149043	SYT8	SYT8	Syt8	SYT8	95.4
ENSG00000011347	SYT7	SYT7	Syt7	SYT7	17.6
ENSG00000134207	SYT6	SYT6	Syt6	SYT6	49.3
ENSG00000129990	SYT5	SYT5	Syt5	SYT5	61.5
ENSG00000132872	SYT4	SYT4	Syt4	SYT4	41.7
ENSG00000213023	SYT3	SYT3	Syt3	SYT3	37.8
ENSG00000143858	SYT2	SYT2	Syt2	SYT2	18.3
ENSG00000103528	SYT17	SYT17	Syt17	SYT17	50.8
ENSG00000139973	SYT16	SYT16	Syt16	SYT16	63.8
ENSG00000019505	SYT13	SYT13	Syt13	SYT13	38
ENSG00000173227	SYT12	SYT12	Syt12	SYT12	78
ENSG00000132718	SYT11	SYT11	Syt11	SYT11	21.6
ENSG00000110975	SYT10	SYT10	Syt10	SYT10	41.9
ENSG00000067715	SYT1	SYT1	Syt1	SYT1	20.4
ENSG00000143028	SYPL2	SYPL2	Sypl2	SYPL2	52.6
ENSG00000008282	SYPL1	SYPL1	Sypl	SYPL1	36
ENSG00000102003	SYP	SYP	Syp	SYP	27.1
ENSG00000163630	SYNPR	SYNPR	Synpr	SYNPR	39.7
ENSG00000166317	SYNPO2L	SYNPO2L	Synpo2l	SYNPO2L	50.2
ENSG00000172403	SYNPO2	SYNPO2	Synpo2	SYNPO2	23.5
ENSG00000171992	SYNPO	SYNPO	Synpo	SYNPO	11.7
ENSG00000182253	SYNM	SYNM	Synm	SYNM	94.9
ENSG00000078269	SYNJ2	SYNJ2	Synj2	SYNJ2	74.8
ENSG00000159082	SYNJ1	SYNJ1	Synj1	SYNJ1	38.3
ENSG00000105467	SYNGR4	SYNGR4	Syngr4	SYNGR4	64
ENSG00000108639	SYNGR2	SYNGR2	Syngr2	SYNGR2	66.5
ENSG00000197283	SYNGAP1	SYNGAP1	Syngap1	SYNGAP1	1.8
ENSG00000181392	SYNE4	SYNE4	Syne4	SYNE4	93.2
ENSG00000176438	SYNE3	SYNE3	Syne3	SYNE3	97
ENSG00000054654	SYNE2	SYNE2	Syne2	SYNE2	94
ENSG00000183379	SYNDIG1L	SYNDIG1L	Syndig1l	SYNDIG1L	59.4
ENSG00000101463	SYNDIG1	SYNDIG1	Syndig1	SYNDIG1	31.9
ENSG00000135316	SYNCRIP	SYNCRIP	Syncrip	SYNCRIP	5.4
ENSG00000162520	SYNC	SYNC	Sync	SYNC	48.1
ENSG00000185666	SYN3	SYN3	Syn3	SYN3	28
ENSG00000125755	SYMPK	SYMPK	Sympk	SYMPK	7.4
ENSG00000165025	SYK	SYK	Syk	SYK	6.5
ENSG00000117614	SYF2	SYF2	Syf2	SYF2	48.6
ENSG00000097096	SYDE2	SYDE2	Syde2	SYDE2	94.8
ENSG00000105137	SYDE1	SYDE1	Syde1	SYDE1	15.1
ENSG00000153157	SYCP2L	SYCP2L	Sycp2l	SYCP2L	93.5
ENSG00000196074	SYCP2	SYCP2	Sycp2	SYCP2	2.3
ENSG00000198765	SYCP1	SYCP1	Sycp1	SYCP1	14.8
ENSG00000179751	SYCN	SYCN	Sycn	SYCN	57.5
ENSG00000171772	SYCE1	SYCE1	Syce1	SYCE1	65.6
ENSG00000147642	SYBU	SYBU	Sybu	SYBU	57.3
ENSG00000169895	SYAP1	SYAP1	Syap1	SYAP1	29.9
ENSG00000116668	SWT1	SWT1	Swt1	SWT1	42.3
ENSG00000173928	SWSAP1	SWSAP1	Swsap1	SWSAP1	71
ENSG00000133789	SWAP70	SWAP70	Swap70	SWAP70	34.2
ENSG00000157703	SVOPL	SVOPL	Svopl	SVOPL	64.2
ENSG00000165124	SVEP1	SVEP1	Svep1	SVEP1	27.7
ENSG00000122012	SV2C	SV2C	Sv2c	SV2C	73.2
ENSG00000185518	SV2B	SV2B	Sv2b	SV2B	29
ENSG00000159164	SV2A	SV2A	Sv2a	SV2A	28
ENSG00000178691	SUZ12	SUZ12	Suz12	SUZ12	5.6
ENSG00000152455	SUV39H2	SUV39H2	Suv39h2	SUV39H2	17.3
ENSG00000101945	SUV39H1	SUV39H1	Suv39h1	SUV39H1	15.8
ENSG00000173705	SUSD5	SUSD5	Susd5	SUSD5	89.7
ENSG00000143502	SUSD4	SUSD4	Susd4	SUSD4	58.6
ENSG00000157303	SUSD3	SUSD3	Susd3	SUSD3	60.1
ENSG00000099994	SUSD2	SUSD2	Susd2	SUSD2	92.7
ENSG00000106868	SUSD1	SUSD1	Susd1	SUSD1	89.1
ENSG00000148296	SURF6	SURF6	Surf6	SURF6	72.5
ENSG00000148248	SURF4	SURF4	Surf4	SURF4	25
ENSG00000148291	SURF2	SURF2	Surf2	SURF2	84.5
ENSG00000148290	SURF1	SURF1	Surf1	SURF1	96.1
ENSG00000156502	SUPV3L1	SUPV3L1	Supv3l1	SUPV3L1	49.1
ENSG00000119760	SUPT7L	SUPT7L	Supt7l	SUPT7L	20.5
ENSG00000109111	SUPT6H	SUPT6H	Supt6	SUPT6H	0.4
ENSG00000196235	SUPT5H	SUPT5H	Supt5	SUPT5H	1.3
ENSG00000213246	SUPT4H1	SUPT4H1	Supt4a	SUPT4H1	34.6
ENSG00000102710	SUPT20H	SUPT20H	Supt20	SUPT20H	63.4
ENSG00000139531	SUOX	SUOX	Suox	SUOX	61.7
ENSG00000167098	SUN5	SUN5	Sun5	SUN5	93.2
ENSG00000164744	SUN3	SUN3	Sun3	SUN3	74.6
ENSG00000100242	SUN2	SUN2	Sun2	SUN2	84.9
ENSG00000164828	SUN1	SUN1	Sun1	SUN1	20.4
ENSG00000184900	SUMO3	SUMO3	Sumo3	SUMO3	35.4
ENSG00000144455	SUMF1	SUMF1	Sumf1	SUMF1	47.9
ENSG00000138068	SULT6B1	SULT6B1	Sult6b1	SULT6B1	93.6
ENSG00000088002	SULT2B1	SULT2B1	Sult2b1	SULT2B1	20.7
ENSG00000196228	SULT1C3	SULT1C3	Sult1c1	SULT1C3	93.7
ENSG00000198203	SULT1C2	SULT1C2	Sult1c2	SULT1C2	77.2
ENSG00000173597	SULT1B1	SULT1B1	Sult1b1	SULT1B1	73.3
ENSG00000196562	SULF2	SULF2	Sulf2	SULF2	18.7
ENSG00000137573	SULF1	SULF1	Sulf1	SULF1	18.7
ENSG00000165416	SUGT1	SUGT1	Sugt1	SUGT1	12.1
ENSG00000064607	SUGP2	SUGP2	Sugp2	SUGP2	5.4
ENSG00000107882	SUFU	SUFU	Sufu	SUFU	5.7
ENSG00000111707	SUDS3	SUDS3	Suds3	SUDS3	56.2
ENSG00000094975	SUCO	SUCO	Suco	SUCO	35.7
ENSG00000198829	SUCNR1	SUCNR1	Sucnr1	SUCNR1	86.7
ENSG00000172340	SUCLG2	SUCLG2	Suclg2	SUCLG2	75
ENSG00000163541	SUCLG1	SUCLG1	Suclg1	SUCLG1	46
ENSG00000136143	SUCLA2	SUCLA2	Sucla2	SUCLA2	49.5
ENSG00000113387	SUB1	SUB1	Sub1	SUB1	21.6
ENSG00000198842	STYXL2	STYXL2	Dusp27	STYXL2	97.1
ENSG00000060140	STYK1	STYK1	Styk1	STYK1	77
ENSG00000168952	STXBP6	STXBP6	Stxbp6	STXBP6	43.3
ENSG00000145087	STXBP5L	STXBP5L	Stxbp5l	STXBP5L	3.3
ENSG00000164506	STXBP5	STXBP5	Stxbp5	STXBP5	2.5
ENSG00000166263	STXBP4	STXBP4	Stxbp4	STXBP4	96.6
ENSG00000116266	STXBP3	STXBP3	Stxbp3	STXBP3	78.8
ENSG00000076944	STXBP2	STXBP2	Stxbp2	STXBP2	72.7
ENSG00000136854	STXBP1	STXBP1	Stxbp1	STXBP1	3.9
ENSG00000170310	STX8	STX8	Stx8	STX8	70.8
ENSG00000079950	STX7	STX7	Stx7	STX7	58.8
ENSG00000135823	STX6	STX6	Stx6	STX6	51.8
ENSG00000162236	STX5	STX5	Stx5a	STX5	33.8
ENSG00000103496	STX4	STX4	Stx4a	STX4	72
ENSG00000166900	STX3	STX3	Stx3	STX3	26.6
ENSG00000111450	STX2	STX2	Stx2	STX2	67.9
ENSG00000099365	STX1B	STX1B	Stx1b	STX1B	15.2
ENSG00000106089	STX1A	STX1A	Stx1a	STX1A	17.3
ENSG00000178750	STX19	STX19	Stx19	STX19	77.7
ENSG00000168818	STX18	STX18	Stx18	STX18	82.3
ENSG00000136874	STX17	STX17	Stx17	STX17	44.1
ENSG00000117758	STX12	STX12	Stx12	STX12	17.9
ENSG00000135604	STX11	STX11	Stx11	STX11	51.7
ENSG00000103266	STUB1	STUB1	Stub1	STUB1	47.9
ENSG00000163527	STT3B	STT3B	Stt3b	STT3B	11.7
ENSG00000134910	STT3A	STT3A	Stt3a	STT3A	12
ENSG00000090372	STRN4	STRN4	Strn4	STRN4	5
ENSG00000196792	STRN3	STRN3	Strn3	STRN3	31.5
ENSG00000115808	STRN	STRN	Strn	STRN	13.1
ENSG00000128578	STRIP2	STRIP2	Strip2	STRIP2	91.3
ENSG00000143093	STRIP1	STRIP1	Strip1	STRIP1	41.5
ENSG00000242866	STRC	STRC	Strc	STRC	57.8
ENSG00000165209	STRBP	STRBP	Strbp	STRBP	3.8
ENSG00000023734	STRAP	STRAP	Strap	STRAP	24.6
ENSG00000082146	STRADB	STRADB	Stradb	STRADB	25.5
ENSG00000266173	STRADA	STRADA	Strada	STRADA	61.9
ENSG00000146857	STRA8	STRA8	Stra8	STRA8	60.8
ENSG00000137868	STRA6	STRA6	Stra6	STRA6	87.5
ENSG00000239605	STPG4	STPG4	Stpg4	STPG4	53.5
ENSG00000163116	STPG2	STPG2	Stpg2	STPG2	95.2
ENSG00000001460	STPG1	STPG1	Stpg1	STPG1	71.7
ENSG00000173320	STOX2	STOX2	Stox2	STOX2	13.7
ENSG00000165730	STOX1	STOX1	Stox1	STOX1	84.9
ENSG00000140022	STON2	STON2	Ston2	STON2	28.3
ENSG00000133115	STOML3	STOML3	Stoml3	STOML3	88.2
ENSG00000165283	STOML2	STOML2	Stoml2	STOML2	29.2
ENSG00000067221	STOML1	STOML1	Stoml1	STOML1	73.6
ENSG00000148175	STOM	STOM	Stom	STOM	66.1
ENSG00000107960	STN1	STN1	Stn1	STN1	77.3
ENSG00000015592	STMN4	STMN4	Stmn4	STMN4	40.8
ENSG00000197457	STMN3	STMN3	Stmn3	STMN3	30.3
ENSG00000104435	STMN2	STMN2	Stmn2	STMN2	16
ENSG00000196182	STK40	STK40	Stk40	STK40	9.5
ENSG00000101109	STK4	STK4	Stk4	STK4	42.2
ENSG00000198648	STK39	STK39	Stk39	STK39	5.2
ENSG00000211455	STK38L	STK38L	Stk38l	STK38L	13.4
ENSG00000112079	STK38	STK38	Stk38	STK38	19.8
ENSG00000163482	STK36	STK36	Stk36	STK36	84.2
ENSG00000125834	STK35	STK35	Stk35	STK35	16.8
ENSG00000130413	STK33	STK33	Stk33	STK33	70.9
ENSG00000165752	STK32C	STK32C	Stk32c	STK32C	35.5
ENSG00000152953	STK32B	STK32B	Stk32b	STK32B	58.8
ENSG00000169302	STK32A	STK32A	Stk32a	STK32A	73.5
ENSG00000196335	STK31	STK31	Stk31	STK31	37.6
ENSG00000104375	STK3	STK3	Stk3	STK3	89.5
ENSG00000115694	STK25	STK25	Stk25	STK25	47.5
ENSG00000102572	STK24	STK24	Stk24	STK24	21.8
ENSG00000204344	STK19	STK19	Stk19	STK19	58.5
ENSG00000081320	STK17B	STK17B	Stk17b	STK17B	43.8
ENSG00000115661	STK16	STK16	Stk16	STK16	67.1
ENSG00000118046	STK11	STK11	Stk11	STK11	12
ENSG00000072786	STK10	STK10	Stk10	STK10	85.6
ENSG00000184584	STING1	STING1	Sting1	STING1	49.3
ENSG00000167323	STIM1	STIM1	Stim1	STIM1	16.3
ENSG00000123473	STIL	STIL	Stil	STIL	38.7
ENSG00000127954	STEAP4	STEAP4	Steap4	STEAP4	77
ENSG00000115107	STEAP3	STEAP3	Steap3	STEAP3	84.1
ENSG00000157214	STEAP2	STEAP2	Steap2	STEAP2	61.2
ENSG00000113739	STC2	STC2	Stc2	STC2	31.3
ENSG00000159167	STC1	STC1	Stc1	STC1	30.7
ENSG00000040341	STAU2	STAU2	Stau2	STAU2	14.7
ENSG00000124214	STAU1	STAU1	Stau1	STAU1	7.8
ENSG00000166888	STAT6	STAT6	Stat6	STAT6	43.1
ENSG00000173757	STAT5B	STAT5B	Stat5b	STAT5B	3.2
ENSG00000126561	STAT5A	STAT5A	Stat5a	STAT5A	4
ENSG00000138378	STAT4	STAT4	Stat4	STAT4	10.2
ENSG00000168610	STAT3	STAT3	Stat3	STAT3	2.6
ENSG00000170581	STAT2	STAT2	Stat2	STAT2	48.2
ENSG00000115415	STAT1	STAT1	Stat1	STAT1	2.3
ENSG00000130052	STARD8	STARD8	Stard8	STARD8	48.9
ENSG00000084090	STARD7	STARD7	Stard7	STARD7	16.2
ENSG00000174448	STARD6	STARD6	Stard6	STARD6	50.3
ENSG00000172345	STARD5	STARD5	Stard5	STARD5	45.8
ENSG00000164211	STARD4	STARD4	Stard4	STARD4	84.6
ENSG00000131748	STARD3	STARD3	Stard3	STARD3	40.6
ENSG00000133121	STARD13	STARD13	Stard13	STARD13	85.3
ENSG00000214530	STARD10	STARD10	Stard10	STARD10	46.9
ENSG00000178078	STAP2	STAP2	Stap2	STAP2	95.9
ENSG00000035720	STAP1	STAP1	Stap1	STAP1	71.1
ENSG00000138134	STAMBPL1	STAMBPL1	Stambpl1	STAMBPL1	76.3
ENSG00000124356	STAMBP	STAMBP	Stambp	STAMBP	63.2
ENSG00000115145	STAM2	STAM2	Stam2	STAM2	49
ENSG00000136738	STAM	STAM	Stam	STAM	17.7
ENSG00000066923	STAG3	STAG3	Stag3	STAG3	82.4
ENSG00000101972	STAG2	STAG2	Stag2	STAG2	1.2
ENSG00000141750	STAC2	STAC2	Stac2	STAC2	76.8
ENSG00000144681	STAC	STAC	Stac	STAC	54.7
ENSG00000136011	STAB2	STAB2	Stab2	STAB2	99.6
ENSG00000010327	STAB1	STAB1	Stab1	STAB1	99.4
ENSG00000148488	ST8SIA6	ST8SIA6	St8sia6	ST8SIA6	87.8
ENSG00000101638	ST8SIA5	ST8SIA5	St8sia5	ST8SIA5	52.1
ENSG00000113532	ST8SIA4	ST8SIA4	St8sia4	ST8SIA4	25.3
ENSG00000177511	ST8SIA3	ST8SIA3	St8sia3	ST8SIA3	13.6
ENSG00000140557	ST8SIA2	ST8SIA2	St8sia2	ST8SIA2	29.6
ENSG00000111728	ST8SIA1	ST8SIA1	St8sia1	ST8SIA1	38.4
ENSG00000007341	ST7L	ST7L	St7l	ST7L	81.4
ENSG00000117069	ST6GALNAC5	ST6GALNAC5	St6galnac5	ST6GALNAC5	19.8
ENSG00000070731	ST6GALNAC2	ST6GALNAC2	St6galnac2	ST6GALNAC2	87.1
ENSG00000070526	ST6GALNAC1	ST6GALNAC1	St6galnac1	ST6GALNAC1	93.8
ENSG00000073849	ST6GAL1	ST6GAL1	St6gal1	ST6GAL1	21.1
ENSG00000064225	ST3GAL6	ST3GAL6	St3gal6	ST3GAL6	64.5
ENSG00000115525	ST3GAL5	ST3GAL5	St3gal5	ST3GAL5	50.1
ENSG00000110080	ST3GAL4	ST3GAL4	St3gal4	ST3GAL4	31.7
ENSG00000126091	ST3GAL3	ST3GAL3	St3gal3	ST3GAL3	28.1
ENSG00000157350	ST3GAL2	ST3GAL2	St3gal2	ST3GAL2	15
ENSG00000008513	ST3GAL1	ST3GAL1	St3gal1	ST3GAL1	27.6
ENSG00000147488	ST18	ST18	St18	ST18	5.9
ENSG00000149418	ST14	ST14	St14	ST14	19.8
ENSG00000117155	SSX2IP	SSX2IP	Ssx2ip	SSX2IP	65.4
ENSG00000125046	SSUH2	SSUH2	Ssu2	SSUH2	87.9
ENSG00000162009	SSTR5	SSTR5	Sstr5	SSTR5	45.8
ENSG00000180616	SSTR2	SSTR2	Sstr2	SSTR2	37.5
ENSG00000139874	SSTR1	SSTR1	Sstr1	SSTR1	20.6
ENSG00000157005	SST	SST	Sst	SST	25.7
ENSG00000149136	SSRP1	SSRP1	Ssrp1	SSRP1	4.7
ENSG00000180879	SSR4	SSR4	Ssr4	SSR4	21.4
ENSG00000114850	SSR3	SSR3	Ssr3	SSR3	35.7
ENSG00000163479	SSR2	SSR2	Ssr2	SSR2	20.9
ENSG00000123096	SSPN	SSPN	Sspn	SSPN	23.1
ENSG00000165120	SSMEM1	SSMEM1	Ssmem1	SSMEM1	95.4
ENSG00000172830	SSH3	SSH3	Ssh3	SSH3	85.8
ENSG00000141298	SSH2	SSH2	Ssh2	SSH2	4.5
ENSG00000084112	SSH1	SSH1	Ssh1	SSH1	10.6
ENSG00000179954	SSC5D	SSC5D	Ssc5d	SSC5D	34.3
ENSG00000130511	SSBP4	SSBP4	Ssbp4	SSBP4	13.8
ENSG00000157216	SSBP3	SSBP3	Ssbp3	SSBP3	4.4
ENSG00000106028	SSBP1	SSBP1	Ssbp1	SSBP1	46.2
ENSG00000141380	SS18	SS18	Ss18	SS18	8.8
ENSG00000271303	SRXN1	SRXN1	Srxn1	SRXN1	55.5
ENSG00000124193	SRSF6	SRSF6	Srsf6	SRSF6	9.2
ENSG00000100650	SRSF5	SRSF5	Srsf5	SRSF5	34.6
ENSG00000116350	SRSF4	SRSF4	Srsf4	SRSF4	15.9
ENSG00000112081	SRSF3	SRSF3	Srsf3	SRSF3	12.2
ENSG00000154548	SRSF12	SRSF12	Srsf12	SRSF12	52.7
ENSG00000116754	SRSF11	SRSF11	Srsf11	SRSF11	4.3
ENSG00000087087	SRRT	SRRT	Srrt	SRRT	11.3
ENSG00000139767	SRRM4	SRRM4	Srrm4	SRRM4	32.5
ENSG00000133226	SRRM1	SRRM1	Srrm1	SRRM1	1.7
ENSG00000100104	SRRD	SRRD	Srrd	SRRD	81.8
ENSG00000167720	SRR	SRR	Srr	SRR	39.4
ENSG00000101955	SRPX	SRPX	Srpx	SRPX	55.6
ENSG00000144867	SRPRB	SRPRB	Srprb	SRPRB	54.6
ENSG00000184343	SRPK3	SRPK3	Srpk3	SRPK3	39.3
ENSG00000135250	SRPK2	SRPK2	Srpk2	SRPK2	7.3
ENSG00000096063	SRPK1	SRPK1	Srpk1	SRPK1	67.8
ENSG00000143742	SRP9	SRP9	Srp9	SRP9	35.5
ENSG00000174780	SRP72	SRP72	Srp72	SRP72	53.4
ENSG00000167881	SRP68	SRP68	Srp68	SRP68	33.8
ENSG00000140319	SRP14	SRP14	Srp14	SRP14	20.4
ENSG00000125508	SRMS	SRMS	Srms	SRMS	94.6
ENSG00000075142	SRI	SRI	Sri	SRI	71.9
ENSG00000122862	SRGN	SRGN	Srgn	SRGN	41.1
[truncated: 9,495 more rows]

## Sheet: S5
Mouse_lethals_one2one
external_gene_name	cow_gene	human_gene	macaca_gene	Lethal	Subviable	Viable
Tbx4	TBX4	TBX4	TBX4	1	0	0
Ngfr	NGFR	NGFR	NGFR	0	1	0
Wnt3	WNT3	WNT3	WNT3	1	0	0
Axin2	AXIN2	AXIN2	AXIN2	1	0	0
Gpr107	GPR107	GPR107	GPR107	1	0	0
Nalcn	NALCN	NALCN	NALCN	1	0	0
Trim25	TRIM25	TRIM25	TRIM25	0	0	1
Dgke	DGKE	DGKE	DGKE	0	0	1
Tpd52l1	TPD52L1	TPD52L1	TPD52L1	0	0	1
Cdh1	CDH1	CDH1	CDH1	1	0	0
Cdh4	CDH4	CDH4	CDH4	0	0	1
Ndufa9	NDUFA9	NDUFA9	NDUFA9	1	0	0
Cttnbp2	CTTNBP2	CTTNBP2	CTTNBP2	0	0	1
Mkrn2	MKRN2	MKRN2	MKRN2	0	0	1
Pparg	PPARG	PPARG	PPARG	1	0	0
Raf1	RAF1	RAF1	RAF1	1	0	0
Acvr1b	ACVR1B	ACVR1B	ACVR1B	1	0	0
Gpa33	GPA33	GPA33	GPA33	0	0	1
Grm6	GRM6	GRM6	GRM6	0	0	1
Myo18a	MYO18A	MYO18A	MYO18A	1	0	0
Haao	HAAO	HAAO	HAAO	0	0	1
Abhd15	ABHD15	ABHD15	ABHD15	0	0	1
Kat2b	KAT2B	KAT2B	KAT2B	0	0	1
Rab5b	RAB5B	RAB5B	RAB5B	0	0	1
Aire	AIRE	AIRE	AIRE	0	0	1
Rpa1	RPA1	RPA1	RPA1	1	0	0
Serpinf1	SERPINF1	SERPINF1	SERPINF1	0	0	1
Slc5a5	SLC5A5	SLC5A5	SLC5A5	0	0	1
Tpd52l2	TPD52L2	TPD52L2	TPD52L2	0	0	1
Dlg3	DLG3	DLG3	DLG3	0	0	1
Mmp11	MMP11	MMP11	MMP11	0	0	1
Smarcb1	SMARCB1	SMARCB1	SMARCB1	1	0	0
Vpreb3	VPREB3	VPREB3	VPREB3	0	0	1
Hip1r	HIP1R	HIP1R	HIP1R	0	0	1
Slc7a7	SLC7A7	SLC7A7	SLC7A7	0	1	0
Chtop	CHTOP	CHTOP	CHTOP	1	0	0
Snapin	SNAPIN	SNAPIN	SNAPIN	1	0	0
Scn4a	SCN4A	SCN4A	SCN4A	1	0	0
N4bp3	N4BP3	N4BP3	N4BP3	0	0	1
Rmnd5b	RMND5B	RMND5B	RMND5B	0	0	1
Nhp2	NHP2	NHP2	NHP2	1	0	0
Vps9d1	VPS9D1	VPS9D1	VPS9D1	0	0	1
Sebox	SEBOX	SEBOX	SEBOX	0	0	1
Dpp9	DPP9	DPP9	DPP9	1	0	0
Pfdn5	PFDN5	PFDN5	PFDN5	1	0	0
Rnd2	RND2	RND2	RND2	0	0	1
Smg5	SMG5	SMG5	SMG5	1	0	0
Tmem79	TMEM79	TMEM79	TMEM79	0	0	1
Snd1	SND1	SND1	SND1	0	1	0
Tubb6	TUBB6	TUBB6	TUBB6	0	0	1
Tulp3	TULP3	TULP3	TULP3	1	0	0
Jup	JUP	JUP	JUP	1	0	0
Tnk1	TNK1	TNK1	TNK1	0	0	1
Acap1	KCTD11	ACAP1	ACAP1	0	0	1
Tat	TAT	TAT	TAT	0	1	0
Gramd3	GRAMD2B	GRAMD2B	GRAMD2B	0	0	1
Smo	SMO	SMO	SMO	1	0	0
Folh1	FOLH1	FOLH1	FOLH1	0	0	1
Pwp1	PWP1	PWP1	PWP1	1	0	0
Fbxo7	FBXO7	FBXO7	FBXO7	0	0	1
Aif1l	AIF1L	AIF1L	AIF1L	0	0	1
Ltbp1	LTBP1	LTBP1	LTBP1	0	1	0
Kcnh6	KCNH6	KCNH6	KCNH6	0	0	1
Trmt1	TRMT1	TRMT1	TRMT1	0	1	0
Nacc1	NACC1	NACC1	NACC1	0	0	1
Srpk3	SRPK3	SRPK3	SRPK3	0	0	1
Pnck	PNCK	PNCK	PNCK	0	0	1
Ltbp2	LTBP2	LTBP2	LTBP2	0	0	1
Foxn1	FOXN1	FOXN1	FOXN1	0	0	1
Unc119	UNC119	UNC119	UNC119	0	0	1
Rab34	RAB34	RAB34	RAB34	1	0	0
Hsf2bp	HSF2BP	HSF2BP	HSF2BP	0	0	1
Bbc3	BBC3	BBC3	BBC3	0	0	1
Celf2	CELF2	CELF2	CELF2	0	1	0
Nr1h3	NR1H3	NR1H3	NR1H3	0	0	1
Vrk3	VRK3	VRK3	VRK3	0	0	1
Smg9	SMG9	SMG9	SMG9	1	0	0
Tead3	TEAD3	TEAD3	TEAD3	0	0	1
Angptl4	ANGPTL4	ANGPTL4	ANGPTL4	0	0	1
Dbf4	DBF4	DBF4	DBF4	1	0	0
Rec8	REC8	REC8	REC8	0	0	1
Dyrk1b	DYRK1B	DYRK1B	DYRK1B	1	0	0
Prpf6	PRPF6	PRPF6	PRPF6	1	0	0
Rgs19	RGS19	RGS19	RGS19	0	0	1
Rgs20	RGS20	RGS20	RGS20	0	0	1
Slc9a3r2	SLC9A3R2	SLC9A3R2	SLC9A3R2	0	0	1
Uck1	UCK1	UCK1	UCK1	0	0	1
Ikzf4	IKZF4	IKZF4	IKZF4	0	0	1
Shh	SHH	SHH	SHH	1	0	0
Clpp	CLPP	CLPP	CLPP	0	0	1
Dennd1c	DENND1C	DENND1C	DENND1C	0	0	1
Lcp2	LCP2	LCP2	LCP2	1	0	0
Fkbp7	FKBP7	FKBP7	FKBP7	0	0	1
Plekha3	PLEKHA3	PLEKHA3	PLEKHA3	0	0	1
Epdr1	EPDR1	EPDR1	EPDR1	0	0	1
Flii	FLII	FLII	FLII	1	0	0
Top3a	TOP3A	TOP3A	TOP3A	1	0	0
Atg4d	ATG4D	ATG4D	ATG4D	0	0	1
Timmdc1	TIMMDC1	TIMMDC1	TIMMDC1	1	0	0
Kcnn1	KCNN1	KCNN1	KCNN1	0	0	1
Med25	MED25	MED25	MED25	1	0	0
Tomm40	TOMM40	TOMM40	TOMM40	1	0	0
Rab8a	RAB8A	RAB8A	RAB8A	0	0	1
Elf3	ELF3	ELF3	ELF3	0	1	0
Efna2	EFNA2	EFNA2	EFNA2	0	0	1
Ppp5c	PPP5C	PPP5C	PPP5C	0	0	1
Cdk12	CDK12	CDK12	CDK12	1	0	0
Lipe	LIPE	LIPE	LIPE	0	0	1
Tbc1d8	TBC1D8	TBC1D8	TBC1D8	0	0	1
Ranbp2	RANBP2	RANBP2	RANBP2	1	0	0
Edar	EDAR	EDAR	EDAR	0	1	0
Grk5	GRK5	GRK5	GRK5	0	0	1
Glg1	GLG1	GLG1	GLG1	0	1	0
Ccdc65	CCDC65	CCDC65	CCDC65	0	1	0
Ddx23	DDX23	DDX23	DDX23	1	0	0
Pld3	PLD3	PLD3	PLD3	0	0	1
Rabac1	RABAC1	RABAC1	RABAC1	0	0	1
Etv3	ETV3	ETV3	ETV3	0	0	1
Supt5	SUPT5H	SUPT5H	SUPT5H	1	0	0
Paf1	PAF1	PAF1	PAF1	1	0	0
Bicd1	BICD1	BICD1	BICD1	0	0	1
Slc25a1	SLC25A1	SLC25A1	SLC25A1	1	0	0
Ddr1	DDR1	DDR1	DDR1	0	1	0
Fosb	FOSB	FOSB	FOSB	0	0	1
Cp	CP	CP	CP	0	0	1
Rps6ka1	RPS6KA1	RPS6KA1	RPS6KA1	0	0	1
Snrnp200	SNRNP200	SNRNP200	SNRNP200	1	0	0
Coq8b	COQ8B	COQ8B	COQ8B	1	0	0
Brd8	BRD8	BRD8	BRD8	1	0	0
Kif20a	KIF20A	KIF20A	KIF20A	1	0	0
Farsa	FARSA	FARSA	FARSA	1	0	0
Gcdh	GCDH	GCDH	GCDH	0	0	1
Mast2	MAST2	MAST2	MAST2	0	0	1
Nfat5	NFAT5	NFAT5	NFAT5	0	1	0
Fam162a	FAM162A	FAM162A	FAM162A	0	0	1
Grm3	GRM3	GRM3	GRM3	0	0	1
Fancl	FANCL	FANCL	FANCL	0	0	1
Hmox2	HMOX2	HMOX2	HMOX2	0	0	1
Map3k20	MAP3K20	MAP3K20	MAP3K20	0	0	1
Trmt10a	TRMT10A	TRMT10A	TRMT10A	0	0	1
Kifc2	KIFC2	KIFC2	KIFC2	0	0	1
Wars2	WARS2	WARS2	WARS2	1	0	0
Emg1	EMG1	EMG1	EMG1	1	0	0
Sst	SST	SST	SST	0	0	1
Col26a1	COL26A1	COL26A1	COL26A1	0	0	1
Ralb	RALB	RALB	RALB	0	0	1
Tbccd1	TBCCD1	TBCCD1	TBCCD1	0	0	1
Coro1c	CORO1C	CORO1C	CORO1C	0	0	1
Pkn2	PKN2	PKN2	PKN2	1	0	0
Nkg7	NKG7	NKG7	NKG7	0	0	1
Ghrhr	GHRHR	GHRHR	GHRHR	0	0	1
Abca13	ABCA13	ABCA13	ABCA13	0	0	1
Rab11a	RAB11A	RAB11A	RAB11A	1	0	0
Eif2b2	EIF2B2	EIF2B2	EIF2B2	1	0	0
Dgkq	DGKQ	DGKQ	DGKQ	0	0	1
Plod3	PLOD3	PLOD3	PLOD3	1	0	0
Mapk13	MAPK13	MAPK13	MAPK13	0	0	1
Nes	NES	NES	NES	0	0	1
Sgta	SGTA	SGTA	SGTA	0	0	1
Nmrk2	NMRK2	NMRK2	NMRK2	0	0	1
Dtx2	DTX2	DTX2	DTX2	0	0	1
Sgsh	SGSH	SGSH	SGSH	0	0	1
Wdr1	WDR1	WDR1	WDR1	1	0	0
Ndrg1	NDRG1	NDRG1	NDRG1	0	0	1
Plekha8	PLEKHA8	PLEKHA8	PLEKHA8	0	0	1
Dnah2	DNAH2	DNAH2	DNAH2	0	0	1
Zfp287	ZNF287	ZNF287	ZNF287	0	0	1
Slc1a3	SLC1A3	SLC1A3	SLC1A3	0	0	1
Fbxo11	FBXO11	FBXO11	FBXO11	1	0	0
Bud23	BUD23	BUD23	BUD23	1	0	0
Myl10	MYL10	MYL10	MYL10	0	0	1
Usp40	USP40	USP40	USP40	0	0	1
Ube2m	UBE2M	UBE2M	UBE2M	1	0	0
Adcy9	ADCY9	ADCY9	ADCY9	0	1	0
Ctr9	CTR9	CTR9	CTR9	1	0	0
Eif4g2	EIF4G2	EIF4G2	EIF4G2	1	0	0
Mthfd2	MTHFD2	MTHFD2	MTHFD2	0	1	0
Ampd3	AMPD3	AMPD3	AMPD3	0	0	1
Pard6a	PARD6A	PARD6A	PARD6A	0	0	1
Tfap4	TFAP4	TFAP4	TFAP4	0	0	1
Mmp8	MMP8	MMP8	MMP8	0	0	1
Gpr108	GPR108	GPR108	GPR108	0	0	1
Spo11	SPO11	SPO11	SPO11	0	0	1
Trh	TRH	TRH	TRH	0	0	1
Nr2c2	NR2C2	NR2C2	NR2C2	0	1	0
Smpd4	SMPD4	SMPD4	SMPD4	0	1	0
Itgae	ITGAE	ITGAE	ITGAE	0	0	1
Tuft1	TUFT1	TUFT1	TUFT1	0	0	1
Dnase1	DNASE1	DNASE1	DNASE1	0	0	1
Ankrd13d	ANKRD13D	ANKRD13D	ANKRD13D	0	0	1
Kptn	KPTN	KPTN	KPTN	0	0	1
Sra1	SRA1	SRA1	SRA1	0	0	1
Calcoco2	CALCOCO2	CALCOCO2	CALCOCO2	0	0	1
Snf8	SNF8	SNF8	SNF8	1	0	0
Prss16	PRSS16	PRSS16	PRSS16	0	0	1
Cdkal1	CDKAL1	CDKAL1	CDKAL1	0	0	1
Fblim1	FBLIM1	FBLIM1	FBLIM1	0	0	1
Atp6v1b1	ATP6V1B1	ATP6V1B1	ATP6V1B1	0	0	1
Vax1	VAX1	VAX1	VAX1	0	1	0
Atp6v1b2	ATP6V1B2	ATP6V1B2	ATP6V1B2	1	0	0
Tep1	TEP1	TEP1	TEP1	0	0	1
Tek	TEK	TEK	TEK	1	0	0
Cdc20	CDC20	CDC20	CDC20	1	0	0
Adamts4	ADAMTS4	ADAMTS4	ADAMTS4	0	0	1
Nectin4	NECTIN4	NECTIN4	PVRL4	0	1	0
Rnf114	RNF114	RNF114	RNF114	0	0	1
Rbm14	RBM14	RBM14	RBM14	0	0	1
Zdhhc24	ZDHHC24	ZDHHC24	ZDHHC24	0	0	1
Pdk1	PDK1	PDK1	PDK1	0	0	1
Snai3	SNAI3	SNAI3	SNAI3	0	0	1
Slc5a6	SLC5A6	SLC5A6	SLC5A6	1	0	0
Tcf23	TCF23	TCF23	TCF23	0	0	1
Usp19	USP19	USP19	USP19	0	1	0
D130043K22Rik	KIAA0319	KIAA0319	KIAA0319	0	0	1
Gmnn	GMNN	GMNN	GMNN	1	0	0
Cyp27b1	CYP27B1	CYP27B1	CYP27B1	0	0	1
Cdk4	CDK4	CDK4	CDK4	0	1	0
Cnp	CNP	CNP	CNP	0	0	1
Tmco6	TMCO6	TMCO6	TMCO6	0	1	0
Stambp	STAMBP	STAMBP	STAMBP	0	1	0
Ezh1	EZH1	EZH1	EZH1	0	0	1
Eif1b	EIF1B	EIF1B	EIF1B	0	0	1
Klk4	KLK4	KLK4	KLK4	0	0	1
Slc44a4	SLC44A4	SLC44A4	SLC44A4	0	0	1
Abhd16a	ABHD16A	ABHD16A	ABHD16A	0	1	0
Atp1a4	ATP1A4	ATP1A4	ATP1A4	0	0	1
Stx1a	STX1A	STX1A	STX1A	0	0	1
Gtpbp3	GTPBP3	GTPBP3	GTPBP3	0	1	0
Ccdc124	CCDC124	CCDC124	CCDC124	0	0	1
Cpt1c	CPT1C	CPT1C	CPT1C	0	0	1
Prrg2	PRRG2	PRRG2	PRRG2	0	0	1
Hnrnph1	HNRNPH1	HNRNPH1	HNRNPH1	1	0	0
Ift43	IFT43	IFT43	IFT43	1	0	0
Abhd8	ABHD8	ABHD8	ABHD8	0	0	1
Fzd3	FZD3	FZD3	FZD3	0	1	0
Emc10	EMC10	EMC10	EMC10	0	0	1
Clstn3	CLSTN3	CLSTN3	CLSTN3	0	0	1
Scrn3	SCRN3	SCRN3	SCRN3	0	0	1
Prpf31	PRPF31	PRPF31	PRPF31	1	0	0
Fut1	FUT1	FUT1	FUT1	0	0	1
Htr3b	HTR3B	HTR3B	HTR3B	0	0	1
Rbfox1	RBFOX1	RBFOX1	RBFOX1	1	0	0
Ncaph2	NCAPH2	NCAPH2	NCAPH2	1	0	0
Gprc5b	GPRC5B	GPRC5B	GPRC5B	0	0	1
Cldn13	CLDN4	CLDN4	CLDN4	0	0	1
Cd163	CD163	CD163	CD163	0	0	1
Rala	RALA	RALA	RALA	0	1	0
Gabpa	GABPA	GABPA	GABPA	1	0	0
Ewsr1	EWSR1	EWSR1	EWSR1	1	0	0
Spatc1l	SPATC1L	SPATC1L	SPATC1L	0	0	1
Mpo	MPO	MPO	MPO	0	0	1
Lpo	LPO	LPO	LPO	0	0	1
Elk1	ELK1	ELK1	ELK1	0	0	1
Rnmt	RNMT	RNMT	RNMT	1	0	0
Cdk9	CDK9	CDK9	CDK9	1	0	0
Ppp2cb	PPP2CB	PPP2CB	PPP2CB	0	1	0
Dmap1	DMAP1	DMAP1	DMAP1	1	0	0
Mcu	MCU	MCU	MCU	1	0	0
Ubp1	UBP1	UBP1	UBP1	1	0	0
Snap47	SNAP47	SNAP47	SNAP47	0	0	1
Epn3	EPN3	EPN3	EPN3	0	0	1
Rnf112	RNF112	RNF112	RNF112	0	0	1
Stx5a	STX5	STX5	STX5	1	0	0
Eya4	EYA4	EYA4	EYA4	1	0	0
Rbm25	RBM25	RBM25	RBM25	1	0	0
Fads1	FADS1	FADS1	FADS1	0	0	1
Apip	APIP	APIP	APIP	0	0	1
Pdhx	PDHX	PDHX	PDHX	1	0	0
Panx3	PANX3	PANX3	PANX	0	0	1
Thg1l	THG1L	THG1L	THG1L	1	0	0
Cpb1	CPB1	CPB1	CPB1	0	0	1
Evi5	EVI5	EVI5	EVI5	0	0	1
Snapc2	SNAPC2	SNAPC2	SNAPC2	1	0	0
Bnip2	BNIP2	BNIP2	BNIP2	0	0	1
Scarf2	SCARF2	SCARF2	SCARF2	0	0	1
Dhdds	DHDDS	DHDDS	DHDDS	1	0	0
Enkd1	ENKD1	ENKD1	ENKD1	0	0	1
Atp6v0d1	ATP6V0D1	ATP6V0D1	ATP6V0D1	1	0	0
Slc41a1	SLC41A1	SLC41A1	SLC41A1	0	0	1
Bcas1	BCAS1	BCAS1	BCAS1	0	0	1
Tango2	TANGO2	TANGO2	TANGO2	0	0	1
Snx31	SNX31	SNX31	SNX31	0	0	1
4933402N03Rik	C26H10orf120	C10orf120	C10orf120	0	0	1
Ehmt2	EHMT2	EHMT2	EHMT2	1	0	0
Elof1	ELOF1	ELOF1	ELOF1	1	0	0
Med16	MED16	MED16	MED16	1	0	0
Myl2	MYL2	MYL2	MYL2	1	0	0
Pax5	PAX5	PAX5	PAX5	1	0	0
Prdm15	PRDM15	PRDM15	PRDM15	0	0	1
Klhl3	KLHL3	KLHL3	KLHL3	0	0	1
Dnajc7	DNAJC7	DNAJC7	DNAJC7	0	0	1
Pigl	PIGL	PIGL	PIGL	1	0	0
Tmem87b	TMEM87B	TMEM87B	TMEM87B	0	0	1
Anapc1	ANAPC1	ANAPC1	ANAPC1	1	0	0
Tsg101	TSG101	TSG101	TSG101	1	0	0
Pkd2l2	PKD2L2	PKD2L2	PKD2L2	0	0	1
Rbsn	RBSN	RBSN	RBSN	1	0	0
Mrps25	MRPS25	MRPS25	MRPS25	1	0	0
Ceacam16	CEACAM16	CEACAM16	CEACAM16	0	0	1
Hoxa2	HOXA2	HOXA2	HOXA2	1	0	0
Ankrd53	ANKRD53	ANKRD53	ANKRD53	0	0	1
Fam120b	FAM120B	FAM120B	FAM120B	0	0	1
Elmo3	ELMO3	ELMO3	ELMO3	0	0	1
Adamts13	ADAMTS13	ADAMTS13	ADAMTS13	0	0	1
Ppp1cb	PPP1CB	PPP1CB	PPP1CB	1	0	0
Gata2	GATA2	GATA2	GATA2	1	0	0
Lrrk1	LRRK1	LRRK1	LRRK1	0	0	1
Aldh1a3	ALDH1A3	ALDH1A3	ALDH1A3	1	0	0
Nolc1	NOLC1	NOLC1	NOLC1	0	0	1
Mtmr1	MTMR1	MTMR1	MTMR1	0	0	1
Abca1	ABCA1	ABCA1	ABCA1	1	0	0
Sash1	SASH1	SASH1	SASH1	1	0	0
Clpx	CLPX	CLPX	CLPX	1	0	0
Cd83	CD83	CD83	CD83	0	0	1
Atf6b	ATF6B	ATF6B	ATF6B	0	1	0
Egfl8	EGFL8	EGFL8	EGFL8	0	0	1
Fam163a	FAM163A	FAM163A	FAM163A	0	0	1
2310057J18Rik	C9H6orf58	C6orf58	C6orf58	0	0	1
Itga2	ITGA2	ITGA2	ITGA2	0	0	1
Mocs2	MOCS2	MOCS2	MOCS2	1	0	0
Gata5	GATA5	GATA5	GATA5	0	0	1
Steap2	STEAP2	STEAP2	STEAP2	0	0	1
Serac1	SERAC1	SERAC1	SERAC1	0	0	1
Awat1	AWAT1	AWAT1	AWAT1	0	0	1
Setdb1	SETDB1	SETDB1	SETDB1	1	0	0
Capza2	CAPZA2	CAPZA2	CAPZA2	0	1	0
Prpf3	PRPF3	PRPF3	PRPF3	1	0	0
Aph1a	APH1A	APH1A	APH1A	1	0	0
Med22	MED22	MED22	MED22	1	0	0
Tnr	TNR	TNR	TNR	0	0	1
Sqstm1	SQSTM1	SQSTM1	SQSTM1	0	0	1
Adamtsl4	ADAMTSL4	ADAMTSL4	ADAMTSL4	0	0	1
Fam184b	FAM184B	FAM184B	FAM184B	0	0	1
Lta4h	LTA4H	LTA4H	LTA4H	0	0	1
Amdhd1	AMDHD1	AMDHD1	AMDHD1	0	0	1
Bola1	BOLA1	BOLA1	BOLA1	0	0	1
Wnt11	WNT11	WNT11	WNT11	0	0	1
Adss	ADSS2	ADSS2	ADSS2	1	0	0
Actr8	ACTR8	ACTR8	ACTR8	1	0	0
Lbp	LBP	LBP	LBP	0	0	1
Syt14	SYT14	SYT14	SYT14	0	0	1
Lonrf3	LONRF3	LONRF3	LONRF3	0	0	1
Ube2a	UBE2A	UBE2A	UBE2A	0	0	1
Eef1a2	EEF1A2	EEF1A2	EEF1A2	0	0	1
Pls3	PLS3	PLS3	PLS3	0	0	1
Mpped2	MPPED2	MPPED2	MPPED2	0	0	1
Mtif3	MTIF3	MTIF3	MTIF3	1	0	0
Mapkapk2	MAPKAPK2	MAPKAPK2	MAPKAPK2	0	0	1
Atxn10	ATXN10	ATXN10	ATXN10	1	0	0
Foxred2	FOXRED2	FOXRED2	FOXRED2	0	0	1
Phf21b	PHF21B	PHF21B	PHF21B	0	0	1
Pacsin2	PACSIN2	PACSIN2	PACSIN2	0	0	1
Ttll12	TTLL12	TTLL12	TTLL12	0	0	1
Tox4	TOX4	TOX4	TOX4	1	0	0
Etaa1	ETAA1	ETAA1	ETAA1	0	0	1
Matn4	MATN4	MATN4	MATN4	0	0	1
Rbpjl	RBPJL	RBPJL	RBPJL	0	0	1
Sdc4	SDC4	SDC4	SDC4	0	0	1
Nbr1	NBR1	NBR1	NBR1	0	0	1
Rnd3	RND3	RND3	RND3	0	0	1
Vps53	VPS53	VPS53	VPS53	1	0	0
Dnttip1	DNTTIP1	DNTTIP1	DNTTIP1	1	0	0
Cd300lg	CD300LG	CD300LG	CD300LG	0	0	1
Mpp2	MPP2	MPP2	MPP2	0	0	1
Ppy	PPY	PPY	PPY	0	0	1
Nlk	NLK	NLK	NLK	1	0	0
Aldoc	ALDOC	ALDOC	ALDOC	0	0	1
Zfp207	ZNF207	ZNF207	ZNF207	1	0	0
Pipox	PIPOX	PIPOX	PIPOX	0	0	1
Crlf3	CRLF3	CRLF3	CRLF3	0	0	1
Rab11fip4	RAB11FIP4	RAB11FIP4	RAB11FIP4	0	0	1
Cd40	CD40	CD40	CD40	0	0	1
Slc35c2	SLC35C2	SLC35C2	SLC35C2	0	0	1
Rhot1	RHOT1	RHOT1	RHOT1	1	0	0
Rhbdl3	RHBDL3	RHBDL3	RHBDL3	0	1	0
Serinc3	SERINC3	SERINC3	SERINC3	0	0	1
Pgs1	PGS1	PGS1	PGS1	1	0	0
Afmid	AFMID	AFMID	AFMID	0	0	1
Mmp9	MMP9	MMP9	MMP9	0	0	1
Spata25	SPATA25	SPATA25	SPATA25	0	0	1
Mlx	MLX	MLX	MLX	0	0	1
Retreg3	RETREG3	RETREG3	RETREG3	0	0	1
Nkiras2	NKIRAS2	NKIRAS2	NKIRAS2	0	0	1
Mybl2	MYBL2	MYBL2	MYBL2	0	1	0
Cadps2	CADPS2	CADPS2	CADPS2	0	0	1
Ddx27	DDX27	DDX27	DDX27	0	1	0
Ints2	INTS2	INTS2	INTS2	1	0	0
Med1	MED1	MED1	MED1	1	0	0
Ikzf3	IKZF3	IKZF3	IKZF3	0	0	1
Uchl5	UCHL5	UCHL5	UCHL5	1	0	0
Il12rb2	IL12RB2	IL12RB2	IL12RB2	0	0	1
Smurf2	SMURF2	SMURF2	SMURF2	0	1	0
Mapt	MAPT	MAPT	MAPT	0	0	1
Kansl1	KANSL1	KANSL1	KANSL1	1	0	0
Dhx40	DHX40	DHX40	DHX40	0	0	1
Ypel2	YPEL2	YPEL2	YPEL2	0	0	1
Derl2	DERL2	DERL2	DERL2	1	0	0
Slc13a3	SLC13A3	SLC13A3	SLC13A3	0	0	1
Kcnab3	KCNAB3	KCNAB3	KCNAB3	0	0	1
Chd3	CHD3	CHD3	CHD3	0	0	1
Adora2b	ADORA2B	ADORA2B	ADORA2B	0	0	1
Pcgf2	PCGF2	PCGF2	PCGF2	1	0	0
Trim37	TRIM37	TRIM37	TRIM37	0	0	1
G3bp1	G3BP1	G3BP1	G3BP1	0	1	0
Sparc	SPARC	SPARC	SPARC	0	0	1
Cdk5rap3	CDK5RAP3	CDK5RAP3	CDK5RAP3	1	0	0
Ndel1	NDEL1	NDEL1	NDEL1	1	0	0
Slc25a35	SLC25A35	SLC25A35	SLC25A35	0	0	1
Zbtb4	ZBTB4	ZBTB4	ZBTB4	0	0	1
Fxr2	FXR2	FXR2	FXR2	0	1	0
Smyd4	SMYD4	SMYD4	SMYD4	0	0	1
Avpi1	AVPI1	AVPI1	AVPI1	0	0	1
Pank3	PANK3	PANK3	PANK3	0	0	1
Arrb1	ARRB1	ARRB1	ARRB1	0	0	1
Med11	MED11	MED11	MED11	1	0	0
Alox15	ALOX15	ALOX15	ALOX15	0	0	1
Nars2	NARS2	NARS2	NARS2	1	0	0
Dalrd3	DALRD3	DALRD3	DALRD3	0	0	1
Plod1	PLOD1	PLOD1	PLOD1	0	0	1
Aldh3a1	ALDH3A1	ALDH3A1	ALDH3A1	0	0	1
Cacng2	CACNG2	CACNG2	CACNG2	0	0	1
H13	HM13	HM13	HM13	1	0	0
Atp6v1e1	ATP6V1E1	ATP6V1E1	ATP6V1E1	1	0	0
Chtf18	CHTF18	CHTF18	CHTF18	0	1	0
Rps6kl1	RPS6KL1	RPS6KL1	RPS6KL1	0	0	1
Tmem129	TMEM129	TMEM129	TMEM129	0	0	1
Hsd17b1	HSD17B1	HSD17B1	HSD17B1	0	0	1
Atp6v0a1	ATP6V0A1	ATP6V0A1	ATP6V0A1	1	0	0
Grb7	GRB7	GRB7	GRB7	0	0	1
Gdpd2	GDPD2	GDPD2	GDPD2	0	0	1
Sec14l4	SEC14L4	SEC14L4	SEC14L4	0	0	1
Rab4a	RAB4A	RAB4A	RAB4A	0	0	1
Ap4m1	AP4M1	AP4M1	AP4M1	0	0	1
Gyg	GYG1	GYG1	GYG1	1	0	0
Arid3a	ARID3A	ARID3A	ARID3A	1	0	0
Pdk4	PDK4	PDK4	PDK4	0	0	1
Cyb561	CYB561	CYB561	CYB561	0	0	1
Sema6a	SEMA6A	SEMA6A	SEMA6A	0	1	0
Gle1	GLE1	GLE1	GLE1	1	0	0
Lyst	LYST	LYST	LYST	0	1	0
Mtrf1l	MTRF1L	MTRF1L	MTRF1L	1	0	0
Rwdd1	RWDD1	RWDD1	RWDD1	0	0	1
Katna1	KATNA1	KATNA1	KATNA1	0	1	0
Sec63	SEC63	SEC63	SEC63	1	0	0
Snx3	SNX3	SNX3	SNX3	1	0	0
Pex3	PEX3	PEX3	PEX3	0	0	1
Cep57l1	CEP57L1	CEP57L1	CEP57L1	1	0	0
Zbtb24	ZBTB24	ZBTB24	ZBTB24	1	0	0
Rev3l	REV3L	REV3L	REV3L	1	0	0
Fyn	FYN	FYN	FYN	1	0	0
Lama4	LAMA4	LAMA4	LAMA4	0	0	1
Popdc3	POPDC3	POPDC3	POPDC3	0	0	1
Prep	PREP	PREP	PREP	1	0	0
Asf1a	ASF1A	ASF1A	ASF1A	1	0	0
Rtn4ip1	RTN4IP1	RTN4IP1	RTN4IP1	1	0	0
Crybg1	CRYBG1	CRYBG1	CRYBG1	1	0	0
Smpdl3a	SMPDL3A	SMPDL3A	SMPDL3A	0	0	1
Hsf2	HSF2	HSF2	HSF2	0	0	1
Mgat4c	MGAT4C	MGAT4C	MGAT4C	0	0	1
Ptprk	PTPRK	PTPRK	PTPRK	0	0	1
Ccdc59	CCDC59	CCDC59	CCDC59	1	0	0
Rfx6	RFX6	RFX6	RFX6	1	0	0
Ube2d1	UBE2D1	UBE2D1	UBE2D1	0	0	1
Dcn	DCN	DCN	DCN	0	0	1
Kera	KERA	KERA	KERA	0	0	1
Atp2b1	ATP2B1	ATP2B1	ATP2B1	0	1	0
Poc1b	POC1B	POC1B	POC1B	0	0	1
Psen1	PSEN1	PSEN1	PSEN1	1	0	0
Hbs1l	HBS1L	HBS1L	HBS1L	0	0	1
Myb	MYB	MYB	MYB	0	1	0
Med23	MED23	MED23	MED23	1	0	0
Stx7	STX7	STX7	STX7	0	0	1
Il20ra	IL20RA	IL20RA	IL20RA	0	0	1
Ntn4	NTN4	NTN4	NTN4	0	0	1
Usp44	USP44	USP44	USP44	0	0	1
Tmcc3	TMCC3	TMCC3	TMCC3	0	0	1
Cep83	CEP83	CEP83	CEP83	1	0	0
Cry1	CRY1	CRY1	CRY1	0	0	1
Timp3	TIMP3	TIMP3	TIMP3	0	0	1
Pah	PAH	PAH	PAH	0	0	1
Washc3	WASHC3	WASHC3	WASHC3	1	0	0
Dram1	DRAM1	DRAM1	DRAM1	0	0	1
Sirt1	SIRT1	SIRT1	SIRT1	0	1	0
Rufy2	RUFY2	RUFY2	RUFY2	0	0	1
Supv3l1	SUPV3L1	SUPV3L1	SUPV3L1	1	0	0
Npffr1	NPFFR1	NPFFR1	NPFFR1	0	0	1
Sgpl1	SGPL1	SGPL1	SGPL1	1	0	0
Vsir	VSIR	VSIR	VSIR	0	0	1
Dnajb12	DNAJB12	DNAJB12	DNAJB12	0	1	0
Micu1	MICU1	MICU1	MICU1	0	1	0
Usp15	USP15	USP15	USP15	0	0	1
Peli1	PELI1	PELI1	PELI1	0	0	1
Slc1a4	SLC1A4	SLC1A4	SLC1A4	0	0	1
Dock2	DOCK2	DOCK2	DOCK2	0	0	1
Meis1	MEIS1	MEIS1	MEIS1	1	0	0
Frs2	FRS2	FRS2	FRS2	1	0	0
Rab36	RAB36	RAB36	RAB36	0	0	1
Vps13d	VPS13D	VPS13D	VPS13D	1	0	0
Prmt2	PRMT2	PRMT2	PRMT2	0	0	1
Dip2a	DIP2A	DIP2A	DIP2A	0	0	1
Fzr1	FZR1	FZR1	FZR1	1	0	0
Glt8d2	GLT8D2	GLT8D2	GLT8D2	0	1	0
Ppm1m	PPM1M	PPM1M	PPM1M	0	0	1
Glyctk	GLYCTK	GLYCTK	GLYCTK	0	0	1
Appl2	APPL2	APPL2	APPL2	0	0	1
Rel	REL	REL	REL	0	0	1
Pfkl	PFKL	PFKL	PFKL	1	0	0
Pus10	PUS10	PUS10	PUS10	0	0	1
Sptbn1	SPTBN1	SPTBN1	SPTBN1	1	0	0
Hmmr	HMMR	HMMR	HMMR	0	0	1
Cyfip2	CYFIP2	CYFIP2	CYFIP2	1	0	0
Mgat1	MGAT1	MGAT1	MGAT1	1	0	0
Cnot6	CNOT6	CNOT6	CNOT6	0	1	0
Gfpt2	GFPT2	GFPT2	GFPT2	0	0	1
Mrnip	MRNIP	MRNIP	MRNIP	0	0	1
Fam71b	FAM71B	FAM71B	FAM71B	0	0	1
Slu7	SLU7	SLU7	SLU7	1	0	0
Btg2	BTG2	BTG2	BTG2	0	0	1
Igfbp3	IGFBP3	IGFBP3	IGFBP3	0	0	1
Pes1	PES1	PES1	PES1	1	0	0
Patz1	PATZ1	PATZ1	PATZ1	1	0	0
Eif4enif1	EIF4ENIF1	EIF4ENIF1	EIF4ENIF1	0	1	0
Ogdh	OGDH	OGDH	OGDH	1	0	0
Cfap36	CFAP36	CFAP36	CFAP36	0	0	1
Ppp4r3b	PPP4R3B	PPP4R3B	PPP4R3B	0	0	1
Pnpt1	PNPT1	PNPT1	PNPT1	1	0	0
Efemp1	EFEMP1	EFEMP1	EFEMP1	0	0	1
Pold2	POLD2	POLD2	POLD2	1	0	0
Zkscan17	ZNF496	ZNF496	ZNF496	1	0	0
Aebp1	AEBP1	AEBP1	AEBP1	1	0	0
Polm	POLM	POLM	POLM	0	0	1
Supt4a	SUPT4H1	SUPT4H1	SUPT4H1	1	0	0
Mrpl22	MRPL22	MRPL22	MRPL22	1	0	0
Gria1	GRIA1	GRIA1	GRIA1	0	0	1
Prpsap2	PRPSAP2	PRPSAP2	PRPSAP2	0	0	1
Shmt1	SHMT1	SHMT1	SHMT1	0	0	1
Stxbp4	STXBP4	STXBP4	STXBP4	0	0	1
Bzw2	BZW2	BZW2	BZW2	0	0	1
Elac2	ELAC2	ELAC2	ELAC2	1	0	0
Sypl	SYPL1	SYPL1	SYPL1	0	0	1
Nampt	NAMPT	NAMPT	NAMPT	1	0	0
Pik3cg	PIK3CG	PIK3CG	PIK3CG	0	0	1
Nbas	NBAS	NBAS	NBAS	1	0	0
Laptm4a	LAPTM4A	LAPTM4A	LAPTM4A	0	0	1
Pum2	PUM2	PUM2	PUM2	1	0	0
Nrcam	NRCAM	NRCAM	NRCAM	0	0	1
Trib2	TRIB2	TRIB2	TRIB2	0	1	0
Arsg	ARSG	ARSG	ARSG	0	0	1
Smc6	SMC6	SMC6	SMC6	1	0	0
Amz2	AMZ2	AMZ2	AMZ2	0	0	1
Gna13	GNA13	GNA13	GNA13	1	0	0
Fam20a	FAM20A	FAM20A	FAM20A	0	0	1
Abca8b	ABCA10	ABCA8	ABCA8	0	0	1
Klhl29	KLHL29	KLHL29	KLHL29	0	1	0
Dcdc2c	DCDC2C	DCDC2C	DCDC2C	0	0	1
Ubxn2a	UBXN2A	UBXN2A	UBXN2A	0	1	0
Fkbp1b	FKBP1B	FKBP1B	FKBP1B	0	0	1
Pfn4	PFN4	PFN4	PFN4	0	0	1
Itsn2	ITSN2	ITSN2	ITSN2	0	0	1
Rnf144a	RNF144A	RNF144A	RNF144A	0	0	1
Ncoa1	NCOA1	NCOA1	NCOA1	0	0	1
Rrm2	RRM2	RRM2	RRM2	1	0	0
Cenpo	CENPO	CENPO	CENPO	1	0	0
Adcy3	ADCY3	ADCY3	ADCY3	0	1	0
Dnajc27	DNAJC27	DNAJC27	DNAJC27	0	0	1
Pomc	POMC	POMC	POMC	0	1	0
Ace	ACE	ACE	ACE	1	0	0
Gas2l2	GAS2L2	GAS2L2	GAS2L2	0	0	1
Efcab3	EFCAB3	EFCAB3	EFCAB3	0	0	1
Ddx42	DDX42	DDX42	DDX42	1	0	0
Polg2	POLG2	POLG2	POLG2	1	0	0
Nt5c	NT5C	NT5C	NT5C	0	0	1
Nup85	NUP85	NUP85	NUP85	1	0	0
Unk	UNK	UNK	UNK	0	1	0
Aspa	ASPA	ASPA	ASPA	0	0	1
Fbf1	FBF1	FBF1	FBF1	0	0	1
Llgl2	LLGL2	LLGL2	LLGL2	1	0	0
Ncbp3	NCBP3	NCBP3	NCBP3	0	1	0
Ube2g1	UBE2G1	UBE2G1	UBE2G1	0	0	1
Spns3	SPNS3	SPNS3	SPNS3	0	0	1
Ube2o	UBE2O	UBE2O	UBE2O	0	1	0
Slc13a5	SLC13A5	SLC13A5	SLC13A5	0	0	1
Rhbdf2	RHBDF2	RHBDF2	RHBDF2	0	0	1
4933427D14Rik	KIAA0753	KIAA0753	KIAA0753	1	0	0
Wscd1	WSCD1	WSCD1	WSCD1	0	0	1
Sec14l1	SEC14L1	SEC14L1	SEC14L1	0	0	1
Mink1	MINK1	MINK1	MINK1	0	0	1
Slc46a1	SLC46A1	SLC46A1	SLC46A1	0	0	1
Coro6	CORO6	CORO6	CORO6	0	0	1
Tmigd1	TMIGD1	TMIGD1	TMIGD1	0	0	1
Timm22	TIMM22	TIMM22	TIMM22	1	0	0
Nme2	NME2	NME2	NME2	0	0	1
Fbxl20	FBXL20	FBXL20	FBXL20	0	1	0
Dlg4	DLG4	DLG4	DLG4	0	0	1
Ctc1	CTC1	CTC1	CTC1	1	0	0
Myh10	MYH10	MYH10	MYH10	1	0	0
Stx8	STX8	STX8	STX8	0	0	1
Usp43	USP43	USP43	USP43	0	0	1
Adprm	ADPRM	ADPRM	ADPRM	0	0	1
Adam11	ADAM11	ADAM11	ADAM11	0	0	1
Eftud2	EFTUD2	EFTUD2	EFTUD2	1	0	0
Dcakd	DCAKD	DCAKD	DCAKD	0	0	1
Strn3	STRN3	STRN3	STRN3	1	0	0
Sel1l	SEL1L	SEL1L	SEL1L	1	0	0
Klhdc2	KLHDC2	KLHDC2	KLHDC2	1	0	0
Nemf	NEMF	NEMF	NEMF	1	0	0
Pnn	PNN	PNN	PNN	1	0	0
Galc	GALC	GALC	GALC	0	0	1
Zc3h14	ZC3H14	ZC3H14	ZC3H14	0	0	1
Polr2h	POLR2H	POLR2H	POLR2H	1	0	0
Gstz1	GSTZ1	GSTZ1	GSTZ1	0	0	1
Ahsa1	AHSA1	AHSA1	AHSA1	0	0	1
Adck1	ADCK1	ADCK1	ADCK1	0	0	1
Mthfd1	MTHFD1	MTHFD1	MTHFD1	1	0	0
Ppp2r5e	PPP2R5E	PPP2R5E	PPP2R5E	0	0	1
Rab15	RAB15	RAB15	RAB15	0	0	1
Nin	NIN	NIN	NIN	0	0	1
Tomm20l	TOMM20L	TOMM20L	TOMM20L	0	0	1
Clmn	CLMN	CLMN	CLMN	0	0	1
Vrk1	VRK1	VRK1	VRK1	1	0	0
Pigh	PIGH	PIGH	PIGH	1	0	0
Susd6	SUSD6	SUSD6	SUSD6	0	0	1
Smoc1	SMOC1	SMOC1	SMOC1	0	1	0
Wdr37	WDR37	WDR37	WDR37	0	0	1
Zmynd11	ZMYND11	ZMYND11	ZMYND11	0	1	0
Esyt2	ESYT2	ESYT2	ESYT2	0	0	1
Efcab11	EFCAB11	EFCAB11	EFCAB11	0	0	1
Lgmn	LGMN	LGMN	LGMN	0	0	1
Golga5	GOLGA5	GOLGA5	GOLGA5	0	0	1
Pitrm1	PITRM1	PITRM1	PITRM1	1	0	0
Papln	PAPLN	PAPLN	PAPLN	0	0	1
Coq6	COQ6	COQ6	COQ6	1	0	0
Npc2	NPC2	NPC2	NPC2	0	0	1
Ylpm1	YLPM1	YLPM1	YLPM1	1	0	0
Mlh3	MLH3	MLH3	MLH3	0	0	1
Tmed10	TMED10	TMED10	TMED10	1	0	0
Tgfb3	TGFB3	TGFB3	TGFB3	1	0	0
Gpatch2l	GPATCH2L	GPATCH2L	GPATCH2L	0	0	1
Evl	EVL	EVL	EVL	0	0	1
Slc25a29	SLC25A29	SLC25A29	SLC25A29	0	0	1
Wars	WARS1	WARS1	WARS1	1	0	0
Fdft1	FDFT1	FDFT1	FDFT1	1	0	0
Tecpr2	TECPR2	TECPR2	TECPR2	0	0	1
Cdc42bpb	CDC42BPB	CDC42BPB	CDC42BPB	0	1	0
Zfyve21	ZFYVE21	ZFYVE21	ZFYVE21	0	0	1
Xrcc3	XRCC3	XRCC3	XRCC3	1	0	0
Hecw1	HECW1	HECW1	HECW1	0	0	1
Ggps1	GGPS1	GGPS1	GGPS1	1	0	0
Gpr137b	GPR137B	GPR137B	GPR137B	0	0	1
Ryr2	RYR2	RYR2	RYR2	1	0	0
Aoah	AOAH	AOAH	AOAH	0	0	1
Carmil1	CARMIL1	CARMIL1	CARMIL1	0	0	1
Gpld1	GPLD1	GPLD1	GPLD1	0	0	1
Cap2	CAP2	CAP2	CAP2	0	1	0
Ippk	IPPK	IPPK	IPPK	1	0	0
Aspn	ASPN	ASPN	ASPN	0	0	1
Ogn	OGN	OGN	OGN	0	0	1
Nol8	NOL8	NOL8	NOL8	1	0	0
Spin1	SPIN1	SPIN1	SPIN1	1	0	0
Pxdc1	PXDC1	PXDC1	PXDC1	0	0	1
Prpf4b	PRPF4B	PRPF4B	PRPF4B	1	0	0
Fars2	FARS2	FARS2	FARS2	1	0	0
Fbp2	FBP2	FBP2	FBP2	0	1	0
Syk	SYK	SYK	SYK	1	0	0
Sfxn1	SFXN1	SFXN1	SFXN1	0	0	1
Zfp346	ZNF346	ZNF346	ZNF346	0	1	0
Ptdss1	PTDSS1	PTDSS1	PTDSS1	0	0	1
Adcy2	ADCY2	ADCY2	ADCY2	0	0	1
Rasa1	RASA1	RASA1	RASA1	1	0	0
Gkap1	GKAP1	GKAP1	GKAP1	0	0	1
Slc28a3	SLC28A3	SLC28A3	SLC28A3	0	0	1
Dapk1	DAPK1	DAPK1	DAPK1	0	0	1
Trip13	TRIP13	TRIP13	TRIP13	0	0	1
Ccdc127	CCDC127	CCDC127	CCDC127	0	0	1
Cast	CAST	CAST	CAST	0	0	1
Pcsk1	PCSK1	PCSK1	PCSK1	0	1	0
Arsk	ARSK	ARSK	ARSK	0	0	1
Nsun2	NSUN2	NSUN2	NSUN2	0	1	0
Mctp1	MCTP1	MCTP1	MCTP1	0	0	1
Slc6a3	SLC6A3	SLC6A3	SLC6A3	0	0	1
Clptm1l	CLPTM1L	CLPTM1L	CLPTM1L	0	0	1
Hapln1	HAPLN1	HAPLN1	HAPLN1	1	0	0
Marveld2	MARVELD2	MARVELD2	MARVELD2	0	0	1
Mccc2	MCCC2	MCCC2	MCCC2	1	0	0
Arhgef28	ARHGEF28	ARHGEF28	ARHGEF28	0	0	1
Iqgap2	IQGAP2	IQGAP2	IQGAP2	0	0	1
F2rl1	F2RL1	F2RL1	F2RL1	0	0	1
Rab3c	RAB3C	RAB3C	RAB3C	0	0	1
Cwc27	CWC27	CWC27	CWC27	0	1	0
Parp8	PARP8	PARP8	PARP8	0	0	1
Emb	EMB	EMB	EMB	0	1	0
Fgf10	FGF10	FGF10	FGF10	1	0	0
Map3k1	MAP3K1	MAP3K1	MAP3K1	0	1	0
Dlg5	DLG5	DLG5	DLG5	1	0	0
Oxsm	OXSM	OXSM	OXSM	1	0	0
Ldb3	LDB3	LDB3	LDB3	1	0	0
Rtraf	RTRAF	RTRAF	RTRAF	1	0	0
Nudt13	NUDT13	NUDT13	NUDT13	0	0	1
Dnajc9	DNAJC9	DNAJC9	DNAJC9	1	0	0
Plau	PLAU	PLAU	PLAU	0	0	1
Psmc6	PSMC6	PSMC6	PSMC6	1	0	0
Bmp4	BMP4	BMP4	BMP4	1	0	0
Slmap	SLMAP	SLMAP	SLMAP	1	0	0
Gpr65	GPR65	GPR65	GPR65	0	0	1
Eaf1	EAF1	EAF1	EAF1	1	0	0
Bap1	BAP1	BAP1	BAP1	1	0	0
Phf7	PHF7	PHF7	PHF7	0	0	1
Msmb	MSMB	MSMB	MSMB	0	0	1
Nisch	NISCH	NISCH	NISCH	0	0	1
Parg	PARG	PARG	PARG	1	0	0
Gdf10	GDF10	GDF10	GDF10	0	0	1
Micu2	MICU2	MICU2	MICU2	0	0	1
Fgf9	FGF9	FGF9	FGF9	1	0	0
Ints9	INTS9	INTS9	INTS9	1	0	0
Cab39l	CAB39L	CAB39L	CAB39L	0	0	1
Cacna2d3	CACNA2D3	CACNA2D3	CACNA2D3	0	0	1
Lcp1	LCP1	LCP1	LCP1	1	0	0
Slc25a30	SLC25A30	SLC25A30	SLC25A30	0	0	1
Enox1	ENOX1	ENOX1	ENOX1	0	0	1
Dnajc15	DNAJC15	DNAJC15	DNAJC15	0	0	1
Akap11	AKAP11	AKAP11	AKAP11	0	0	1
Rgcc	RGCC	RGCC	RGCC	0	0	1
Diaph3	DIAPH3	DIAPH3	DIAPH3	1	0	0
Stmn4	STMN4	STMN4	STMN4	0	0	1
Ppp2r2a	PPP2R2A	PPP2R2A	PPP2R2A	1	0	0
Pibf1	PIBF1	PIBF1	PIBF1	1	0	0
Ppp3cc	PPP3CC	PPP3CC	PPP3CC	0	0	1
Slc39a14	SLC39A14	SLC39A14	SLC39A14	0	1	0
Gpc5	GPC5	GPC5	GPC5	0	0	1
Rbm26	RBM26	RBM26	RBM26	0	1	0
Acod1	ACOD1	ACOD1	ACOD1	0	0	1
Fyb	FYB1	FYB1	FYB1	0	0	1
C9	C9	C9	C9	0	0	1
Mettl3	METTL3	METTL3	METTL3	1	0	0
Slc7a8	SLC7A8	SLC7A8	SLC7A8	0	0	1
Slc22a17	SLC22A17	SLC22A17	SLC22A17	1	0	0
Golph3	GOLPH3	GOLPH3	GOLPH3	0	0	1
Ngdn	NGDN	NGDN	NGDN	1	0	0
Npr3	NPR3	NPR3	NPR3	0	0	1
Dcaf11	DCAF11	DCAF11	DCAF11	0	0	1
Psme1	PSME1	PSME1	PSME1	0	0	1
Ripk3	RIPK3	RIPK3	RIPK3	0	0	1
Cct5	CCT5	CCT5	CCT5	1	0	0
Cmbl	CMBL	CMBL	CMBL	0	0	1
Ropn1l	ROPN1L	ROPN1L	ROPN1L	0	0	1
Rai14	RAI14	RAI14	RAI14	0	1	0
Rad1	RAD1	RAD1	RAD1	1	0	0
Sdc2	SDC2	SDC2	SDC2	0	0	1
Dnah5	DNAH5	DNAH5	DNAH5	0	1	0
Ywhaz	YWHAZ	YWHAZ	YWHAZ	0	1	0
Atp6v1c1	ATP6V1C1	ATP6V1C1	ATP6V1C1	1	0	0
Oxr1	OXR1	OXR1	OXR1	0	0	1
Csmd3	CSMD3	CSMD3	CSMD3	0	0	1
Eif3h	EIF3H	EIF3H	EIF3H	1	0	0
Slc30a8	SLC30A8	SLC30A8	SLC30A8	0	0	1
Stk3	STK3	STK3	STK3	0	0	1
Khdrbs3	KHDRBS3	KHDRBS3	KHDRBS3	0	0	1
Sqle	SQLE	SQLE	SQLE	1	0	0
Ndufb9	NDUFB9	NDUFB9	NDUFB9	1	0	0
Wdyhv1	NTAQ1	NTAQ1	NTAQ1	0	0	1
Zhx1	ZHX1	ZHX1	ZHX1	0	0	1
Col14a1	COL14A1	COL14A1	COL14A1	0	0	1
Ppara	PPARA	PPARA	PPARA	0	0	1
L3mbtl2	L3MBTL2	L3MBTL2	L3MBTL2	1	0	0
Xpnpep3	XPNPEP3	XPNPEP3	XPNPEP3	0	0	1
Adsl	ADSL	ADSL	ADSL	1	0	0
Cacna1i	CACNA1I	CACNA1I	CACNA1I	0	0	1
Dscc1	DSCC1	DSCC1	DSCC1	0	1	0
Myh9	MYH9	MYH9	MYH9	1	0	0
Twf1	TWF1	TWF1	TWF1	0	0	1
Naga	NAGA	NAGA	NAGA	0	0	1
Slc38a2	SLC38A2	SLC38A2	SLC38A2	0	1	0
Endou	ENDOU	ENDOU	ENDOU	0	0	1
Pde1b	PDE1B	PDE1B	PDE1B	0	0	1
Ppp1r1a	PPP1R1A	PPP1R1A	PPP1R1A	0	0	1
Tnfrsf17	TNFRSF17	TNFRSF17	TNFRSF17	0	0	1
Cldn1	CLDN1	CLDN1	CLDN1	1	0	0
Anks3	ANKS3	ANKS3	ANKS3	1	0	0
Mgrn1	MGRN1	MGRN1	MGRN1	0	0	1
Hsf1	HSF1	HSF1	HSF1	0	1	0
Gpaa1	GPAA1	GPAA1	GPAA1	1	0	0
Gsdmd	GSDMD	GSDMD	GSDMD	0	0	1
Rhpn1	RHPN1	RHPN1	RHPN1	0	0	1
Psca	PSCA	PSCA	PSCA	0	0	1
Cep97	CEP97	CEP97	CEP97	1	0	0
Bbx	BBX	BBX	BBX	0	0	1
Cd96	CD96	CD96	CD96	0	0	1
Atg3	ATG3	ATG3	ATG3	1	0	0
Mcm4	MCM4	MCM4	MCM4	1	0	0
Snai2	SNAI2	SNAI2	SNAI2	0	1	0
Pla2g10	PLA2G10	PLA2G10	PLA2G10	0	0	1
Boc	BOC	BOC	BOC	0	0	1
Sidt1	SIDT1	SIDT1	SIDT1	0	0	1
Hira	HIRA	HIRA	HIRA	1	0	0
Gbe1	GBE1	GBE1	GBE1	1	0	0
Adgrg7	ADGRG7	ADGRG7	ADGRG7	0	0	1
P2rx6	P2RX6	P2RX6	P2RX6	0	0	1
Lztr1	LZTR1	LZTR1	LZTR1	1	0	0
Ccdc116	CCDC116	CCDC116	CCDC116	0	0	1
Sdf2l1	SDF2L1	SDF2L1	SDF2L1	0	0	1
Ypel1	YPEL1	YPEL1	YPEL1	0	0	1
Fgd4	FGD4	FGD4	FGD4	0	0	1
Dnm1l	DNM1L	DNM1L	DNM1L	1	0	0
Igsf11	IGSF11	IGSF11	IGSF11	0	0	1
Osbpl11	OSBPL11	OSBPL11	OSBPL11	1	0	0
Zfp148	ZNF148	ZNF148	ZNF148	1	0	0
Fstl1	FSTL1	FSTL1	FSTL1	0	0	1
Abcc5	ABCC5	ABCC5	ABCC5	0	0	1
Stxbp5l	STXBP5L	STXBP5L	STXBP5L	0	0	1
Iqcb1	IQCB1	IQCB1	IQCB1	0	1	0
Thpo	THPO	THPO	THPO	0	0	1
Hspbap1	HSPBAP1	HSPBAP1	HSPBAP1	0	0	1
Chodl	CHODL	CHODL	CHODL	0	0	1
D16Ertd472e	C1H21orf91	C21orf91	C21orf91	0	0	1
Usp25	USP25	USP25	USP25	0	0	1
Ahsg	AHSG	AHSG	AHSG	0	0	1
Masp1	MASP1	MASP1	MASP1	0	1	0
App	APP	APP	APP	0	1	0
Ildr1	ILDR1	ILDR1	ILDR1	0	0	1
Brwd1	BRWD1	BRWD1	BRWD1	0	0	1
Fam3b	FAM3B	FAM3B	FAM3B	0	0	1
Setd4	SETD4	SETD4	SETD4	0	0	1
Gart	GART	GART	GART	1	0	0
Ifnar1	IFNAR1	IFNAR1	IFNAR1	0	0	1
Synj1	SYNJ1	SYNJ1	SYNJ1	1	0	0
Wnt10b	WNT10B	WNT10B	WNT10B	0	0	1
Wnt1	WNT1	WNT1	WNT1	0	1	0
Fmnl3	FMNL3	FMNL3	FMNL3	0	1	0
Cers5	CERS5	CERS5	CERS5	0	0	1
Lima1	LIMA1	LIMA1	LIMA1	0	1	0
Dip2b	DIP2B	DIP2B	DIP2B	0	1	0
Krt7	KRT7	KRT7	KRT7	0	0	1
Map3k12	MAP3K12	MAP3K12	MAP3K12	1	0	0
Npff	NPFF	NPFF	NPFF	0	0	1
Rttn	RTTN	RTTN	RTTN	1	0	0
Cdkn1a	CDKN1A	CDKN1A	CDKN1A	0	0	1
Slc10a2	SLC10A2	SLC10A2	SLC10A2	0	0	1
Lrrc71	LRRC71	LRRC71	LRRC71	0	0	1
Rfc2	RFC2	RFC2	RFC2	1	0	0
Prmt5	PRMT5	PRMT5	PRMT5	1	0	0
Sympk	SYMPK	SYMPK	SYMPK	1	0	0
Gabrr2	GABRR1	GABRR2	GABRR2	0	0	1
Creld2	CRELD2	CRELD2	CRELD2	0	0	1
Twf2	TWF2	TWF2	TWF2	0	0	1
Dtwd1	DTWD1	DTWD1	DTWD1	0	0	1
Wfdc1	WFDC1	WFDC1	WFDC1	0	0	1
Poc1a	POC1A	POC1A	POC1A	0	1	0
Trip6	TRIP6	TRIP6	TRIP6	0	0	1
Slc17a9	SLC17A9	SLC17A9	SLC17A9	0	0	1
Stk31	STK31	STK31	STK31	0	0	1
Nfatc4	NFATC4	NFATC4	NFATC4	0	0	1
Gnb3	GNB3	GNB3	GNB3	0	0	1
Rab12	RAB12	RAB12	RAB12	0	0	1
Synj2	SYNJ2	SYNJ2	SYNJ2	0	0	1
Agpat4	AGPAT4	AGPAT4	AGPAT4	0	0	1
Lnpep	LNPEP	LNPEP	LNPEP	0	0	1
Chd1	CHD1	CHD1	CHD1	1	0	0
1700010I14Rik	C9H6orf118	C6orf118	C6orf118	0	0	1
Smoc2	SMOC2	SMOC2	SMOC2	0	0	1
Flywch2	FLYWCH2	FLYWCH2	FLYWCH2	0	0	1
Pla2g7	PLA2G7	PLA2G7	PLA2G7	0	0	1
Adgrf4	ADGRF4	ADGRF4	ADGRF4	0	0	1
Tbc1d5	TBC1D5	TBC1D5	TBC1D5	0	0	1
Crisp2	CRISP2	CRISP2	CRISP2	0	0	1
Spats1	SPATS1	SPATS1	SPATS1	0	0	1
Aars2	AARS2	AARS2	AARS2	1	0	0
Sgo1	SGO1	SGO1	SGO1	1	0	0
Slc29a1	SLC29A1	SLC29A1	SLC29A1	0	0	1
Sult1c1	SULT1C3	SULT1C3	SULT1C3	0	0	1
Slc5a7	SLC5A7	SLC5A7	SLC5A7	1	0	0
Gtpbp2	GTPBP2	GTPBP2	GTPBP2	0	1	0
Clic5	CLIC5	CLIC5	CLIC5	0	0	1
Enpp5	ENPP5	ENPP5	ENPP5	0	0	1
Rsph9	RSPH9	RSPH9	RSPH9	0	1	0
Crip3	CRIP3	CRIP3	CRIP3	0	0	1
Ptk7	PTK7	PTK7	PTK7	1	0	0
Ubr2	UBR2	UBR2	UBR2	0	1	0
Tfeb	TFEB	TFEB	TFEB	1	0	0
Treml1	TREML1	TREML1	TREML1	0	0	1
Stk38	STK38	STK38	STK38	0	1	0
Cpne5	CPNE5	CPNE5	CPNE5	0	0	1
Glp1r	GLP1R	GLP1R	GLP1R	0	0	1
Tff1	TFF1	TFF1	TFF1	0	0	1
Rsph1	RSPH1	RSPH1	RSPH1	0	0	1
Myom1	MYOM1	MYOM1	MYOM1	0	0	1
Lpin2	LPIN2	LPIN2	LPIN2	0	1	0
Dpy30	DPY30	DPY30	DPY30	1	0	0
Spast	SPAST	SPAST	SPAST	0	0	1
Crim1	CRIM1	CRIM1	CRIM1	1	0	0
Pja2	PJA2	PJA2	PJA2	0	0	1
Nrxn1	NRXN1	NRXN1	NRXN1	0	0	1
Lrpprc	LRPPRC	LRPPRC	LRPPRC	1	0	0
Abca3	ABCA3	ABCA3	ABCA3	1	0	0
Slc3a1	SLC3A1	SLC3A1	SLC3A1	0	0	1
Dnase1l2	DNASE1L2	DNASE1L2	DNASE1L2	0	0	1
Epas1	EPAS1	EPAS1	EPAS1	1	0	0
Pigf	PIGF	PIGF	PIGF	1	0	0
Ift140	IFT140	IFT140	IFT140	1	0	0
Telo2	TELO2	TELO2	TELO2	1	0	0
Dusp1	DUSP1	DUSP1	DUSP1	0	0	1
Bnip1	BNIP1	BNIP1	BNIP1	1	0	0
Phf1	PHF1	PHF1	PHF1	0	0	1
Kdm4b	KDM4B	KDM4B	KDM4B	0	1	0
Grm8	GRM8	GRM8	GRM8	0	0	1
Taf11	TAF11	TAF11	TAF11	1	0	0
Anks1	ANKS1A	ANKS1A	ANKS1A	0	0	1
Fkbp5	FKBP5	FKBP5	FKBP5	0	1	0
Nudt12	NUDT12	NUDT12	NUDT12	0	0	1
Bambi	BAMBI	BAMBI	BAMBI	0	0	1
Mtpap	MTPAP	MTPAP	MTPAP	1	0	0
Map3k8	MAP3K8	MAP3K8	MAP3K8	0	0	1
Thada	THADA	THADA	THADA	0	0	1
Slc25a46	SLC25A46	SLC25A46	SLC25A46	0	0	1
Sap130	SAP130	SAP130	SAP130	1	0	0
Adad2	ADAD2	ADAD2	ADAD2	0	0	1
Celf4	CELF4	CELF4	CELF4	1	0	0
Tpgs2	TPGS2	TPGS2	TPGS2	0	0	1
Wac	WAC	WAC	WAC	1	0	0
Rock1	ROCK1	ROCK1	ROCK1	0	1	0
Ccdc178	CCDC178	CCDC178	CCDC178	0	0	1
Pfdn6	PFDN6	PFDN6	PFDN6	0	1	0
Rnf138	RNF138	RNF138	RNF138	0	0	1
Slc39a7	SLC39A7	SLC39A7	SLC39A7	1	0	0
Dsc2	DSC2	DSC2	DSC2	0	0	1
Brd2	BRD2	BRD2	BRD2	1	0	0
Dnajc18	DNAJC18	DNAJC18	DNAJC18	0	1	0
Nelfe	NELFE	NELFE	NELFE	1	0	0
Epb41l4a	EPB41L4A	EPB41L4A	EPB41L4A	0	0	1
Ercc3	ERCC3	ERCC3	ERCC3	1	0	0
Apom	APOM	APOM	APOM	0	0	1
Aif1	AIF1	AIF1	AIF1	0	0	1
Lta	LTA	LTA	LTA	0	0	1
Npc1	NPC1	NPC1	NPC1	0	1	0
Dhx16	DHX16	DHX16	DHX16	1	0	0
Pcdh12	PCDH12	PCDH12	PCDH12	0	0	1
Arap3	ARAP3	ARAP3	ARAP3	0	0	1
Hdac3	HDAC3	HDAC3	HDAC3	1	0	0
Dcp2	DCP2	DCP2	DCP2	1	0	0
Yipf5	YIPF5	YIPF5	YIPF5	1	0	0
Lars	LARS1	LARS1	LARS1	1	0	0
Tcerg1	TCERG1	TCERG1	TCERG1	1	0	0
Ppp2r2b	PPP2R2B	PPP2R2B	PPP2R2B	0	0	1
Hsd17b4	HSD17B4	HSD17B4	HSD17B4	0	1	0
Rab27b	RAB27B	RAB27B	RAB27B	0	0	1
Mbd2	MBD2	MBD2	MBD2	0	0	1
Sec11c	SEC11C	SEC11C	SEC11C	0	0	1
Grp	GRP	GRP	GRP	0	0	1
Ptpn2	PTPN2	PTPN2	PTPN2	0	0	1
Cep192	CEP192	CEP192	CEP192	0	0	1
Ldlrad4	LDLRAD4	LDLRAD4	LDLRAD4	0	0	1
Me2	ME2	ME2	ME2	0	0	1
Mbd1	MBD1	MBD1	MBD1	0	0	1
Pde6a	PDE6A	PDE6A	PDE6A	0	0	1
Pcyox1l	PCYOX1L	PCYOX1L	PCYOX1L	0	0	1
Nedd4l	NEDD4L	NEDD4L	NEDD4L	0	1	0
Dctn4	DCTN4	DCTN4	DCTN4	1	0	0
Rbm22	RBM22	RBM22	RBM22	1	0	0
Pdgfrb	PDGFRB	PDGFRB	PDGFRB	1	0	0
Hmgxb3	HMGXB3	HMGXB3	HMGXB3	0	1	0
Psat1	PSAT1	PSAT1	PSAT1	1	0	0
Cndp2	CNDP2	CNDP2	CNDP2	0	0	1
Fads3	FADS3	FADS3	FADS3	0	0	1
Tmem138	TMEM138	TMEM138	TMEM138	0	0	1
Lpxn	LPXN	LPXN	LPXN	0	0	1
Pcsk5	PCSK5	PCSK5	PCSK5	1	0	0
Ostf1	OSTF1	OSTF1	OSTF1	0	0	1
Slc15a3	SLC15A3	SLC15A3	SLC15A3	0	0	1
Syt7	SYT7	SYT7	SYT7	0	0	1
Atl3	ATL3	ATL3	ATL3	0	0	1
Otub1	OTUB1	OTUB1	OTUB1	1	0	0
Lipn	LIPN	LIPN	LIPN	0	0	1
Snx15	SNX15	SNX15	SNX15	0	0	1
Cdca5	CDCA5	CDCA5	CDCA5	1	0	0
Htr7	HTR7	HTR7	HTR7	0	0	1
Ankrd1	ANKRD1	ANKRD1	ANKRD1	0	0	1
Tnks2	TNKS2	TNKS2	TNKS2	0	0	1
Eif1ad	EIF1AD	EIF1AD	EIF1AD	1	0	0
Chka	CHKA	CHKA	CHKA	1	0	0
Pacs1	PACS1	PACS1	PACS1	0	1	0
Klc2	KLC2	KLC2	KLC2	0	0	1
Mbl2	MBL2	MBL2	MBL2	0	0	1
Cnih2	CNIH2	CNIH2	CNIH2	0	0	1
Pcx	PC	PC	PC	1	0	0
Cpt1a	CPT1A	CPT1A	CPT1A	0	0	1
Ovol1	OVOL1	OVOL1	OVOL1	0	1	0
Rnaseh2c	RNASEH2C	RNASEH2C	RNASEH2C	1	0	0
Esrra	ESRRA	ESRRA	ESRRA	0	0	1
Gpr137	GPR137	GPR137	GPR137	0	0	1
Vegfb	VEGFB	VEGFB	VEGFB	0	0	1
Fermt3	FERMT3	FERMT3	FERMT3	1	0	0
Smc3	SMC3	SMC3	SMC3	1	0	0
Acsl5	ACSL5	ACSL5	ACSL5	0	0	1
Vti1a	VTI1A	VTI1A	VTI1A	0	0	1
Tcf7l2	TCF7L2	TCF7L2	TCF7L2	1	0	0
Cep55	CEP55	CEP55	CEP55	0	1	0
Rbp4	RBP4	RBP4	RBP4	0	0	1
Hells	HELLS	HELLS	HELLS	1	0	0
Aldh18a1	ALDH18A1	ALDH18A1	ALDH18A1	1	0	0
Tctn3	TCTN3	TCTN3	TCTN3	1	0	0
Dntt	DNTT	DNTT	DNTT	0	0	1
Pik3ap1	PIK3AP1	PIK3AP1	PIK3AP1	0	0	1
Slit1	SLIT1	SLIT1	SLIT1	0	0	1
Xpnpep1	XPNPEP1	XPNPEP1	XPNPEP1	0	1	0
Trim8	TRIM8	TRIM8	TRIM8	0	0	1
Gsto2	GSTO2	GSTO2	GSTO2	0	0	1
Nhlrc2	NHLRC2	NHLRC2	NHLRC2	1	0	0
Vwa2	VWA2	VWA2	VWA2	0	0	1
Trub1	TRUB1	TRUB1	TRUB1	0	0	1
Hdgfl3	HDGFL3	HDGFL3	HDGFL3	0	0	1
Pycr1	PYCR1	PYCR1	PYCR1	0	0	1
Aspscr1	ASPSCR1	ASPSCR1	ASPSCR1	0	0	1
Maged1	MAGED1	MAGED1	MAGED1	0	0	1
Gps1	GPS1	GPS1	GPS1	1	0	0
Cd7	CD7	CD7	CD7	0	0	1
R3hcc1l	R3HCC1L	R3HCC1L	R3HCC1L	0	0	1
Got1	GOT1	GOT1	GOT1	1	0	0
Abcc2	ABCC2	ABCC2	ABCC2	0	0	1
Dnmbp	DNMBP	DNMBP	DNMBP	0	0	1
Cpn1	CPN1	CPN1	CPN1	0	0	1
Erlin1	ERLIN1	ERLIN1	ERLIN1	0	0	1
Sfxn3	SFXN3	SFXN3	SFXN3	0	0	1
Btrc	BTRC	BTRC	BTRC	0	0	1
Fgf8	FGF8	FGF8	FGF8	1	0	0
Gbf1	GBF1	GBF1	GBF1	1	0	0
Fbxl15	FBXL15	FBXL15	FBXL15	0	0	1
Pitx3	PITX3	PITX3	PITX3	0	0	1
Sufu	SUFU	SUFU	SUFU	1	0	0
Bbs4	BBS4	BBS4	BBS4	0	1	0
Sacm1l	SACM1L	SACM1L	SACM1L	1	0	0
Pfkfb1	PFKFB1	PFKFB1	PFKFB1	0	0	1
Flnb	FLNB	FLNB	FLNB	1	0	0
Polr3a	POLR3A	POLR3A	POLR3A	1	0	0
Itgb8	ITGB8	ITGB8	ITGB8	1	0	0
Padi3	PADI3	PADI3	PADI3	0	0	1
Mettl7b	METTL7B	METTL7B	METTL7B	0	0	1
Pmel	PMEL	PMEL	PMEL	0	0	1
Rps26	RPS26	RPS26	RPS26	0	0	1
Baiap2	BAIAP2	BAIAP2	BAIAP2	0	1	0
Nabp2	NABP2	NABP2	NABP2	1	0	0
Tepsin	TEPSIN	TEPSIN	TEPSIN	0	0	1
Atp5b	ATP5F1B	ATP5F1B	ATP5F1B	1	0	0
Nab2	NAB2	NAB2	NAB2	0	0	1
Ddit3	DDIT3	DDIT3	DDIT3	0	0	1
Mbd6	MBD6	MBD6	MBD6	1	0	0
Dctn2	DCTN2	DCTN2	DCTN2	1	0	0
Pip4k2c	PIP4K2C	PIP4K2C	PIP4K2C	0	0	1
Katnal2	KATNAL2	KATNAL2	KATNAL2	0	0	1
Pias2	PIAS2	PIAS2	PIAS2	0	0	1
Atp5a1	ATP5F1A	ATP5F1A	ATP5F1A	1	0	0
Pstpip2	PSTPIP2	PSTPIP2	PSTPIP2	0	0	1
Adam8	ADAM8	ADAM8	ADAM8	0	0	1
Cyp2e1	CYP2E1	CYP2E1	CYP2E1	0	0	1
Syce1	SYCE1	SYCE1	SYCE1	0	0	1
Ric8a	RIC8A	RIC8A	RIC8A	1	0	0
Sirt3	SIRT3	SIRT3	SIRT3	0	0	1
Irf7	IRF7	IRF7	IRF7	0	0	1
Eps8l2	EPS8L2	EPS8L2	EPS8L2	0	0	1
Apool	APOOL	APOOL	APOOL	0	0	1
Clybl	CLYBL	CLYBL	CLYBL	0	0	1
Farp1	FARP1	FARP1	FARP1	0	0	1
Dock9	DOCK9	DOCK9	DOCK9	0	0	1
Tmc6	TMC6	TMC6	TMC6	0	0	1
Cant1	CANT1	CANT1	CANT1	0	1	0
Cbx2	CBX2	CBX2	CBX2	1	0	0
Rptor	RPTOR	RPTOR	RPTOR	1	0	0
Pde8a	PDE8A	PDE8A	PDE8A	0	0	1
Zfp202	ZNF202	ZNF202	ZNF202	0	0	1
Bach1	BACH1	BACH1	BACH1	0	1	0
Atrip	ATRIP	ATRIP	ATRIP	1	0	0
Pfkfb4	PFKFB4	PFKFB4	PFKFB4	0	0	1
Cnksr2	CNKSR2	CNKSR2	CNKSR2	0	0	1
Myo3a	MYO3A	MYO3A	MYO3A	0	0	1
A930017K11Rik	PRR35	PRR35	PRR35	0	0	1
Pigq	PIGQ	PIGQ	PIGQ	1	0	0
Rab40c	RAB40C	RAB40C	RAB40C	0	1	0
Mettl26	METTL26	METTL26	METTL26	0	0	1
Rhbdl1	RHBDL1	RHBDL1	RHBDL1	1	0	0
Jmjd8	JMJD8	JMJD8	JMJD8	0	0	1
Wdr24	WDR24	WDR24	WDR24	1	0	0
Fbxl16	FBXL16	FBXL16	FBXL16	0	1	0
Gng13	GNG13	GNG13	GNG13	0	1	0
Agbl1	AGBL1	AGBL1	AGBL1	0	0	1
Mfsd8	MFSD8	MFSD8	MFSD8	0	0	1
Larp1b	LARP1B	LARP1B	LARP1B	0	0	1
Jade1	JADE1	JADE1	JADE1	0	0	1
Gdap1	GDAP1	GDAP1	GDAP1	0	0	1
Clec3b	CLEC3B	CLEC3B	CLEC3B	0	0	1
Nrp1	NRP1	NRP1	NRP1	1	0	0
Pard3	PARD3	PARD3	PARD3	1	0	0
Dhtkd1	DHTKD1	DHTKD1	DHTKD1	0	0	1
Nudt5	NUDT5	NUDT5	NUDT5	0	0	1
Pdia4	PDIA4	PDIA4	PDIA4	0	0	1
Fam20c	FAM20C	FAM20C	FAM20C	0	1	0
Arl10	ARL10	ARL10	ARL10	0	0	1
Tspan17	TSPAN17	TSPAN17	TSPAN17	0	0	1
Snca	SNCA	SNCA	SNCA	0	0	1
Alkbh8	ALKBH8	ALKBH8	ALKBH8	0	0	1
Ppp1r42	PPP1R42	PPP1R42	PPP1R42	0	0	1
Stau2	STAU2	STAU2	STAU2	0	0	1
Tfap2b	TFAP2B	TFAP2B	TFAP2B	1	0	0
Eya1	EYA1	EYA1	EYA1	0	1	0
Tmem70	TMEM70	TMEM70	TMEM70	1	0	0
Pth2r	PTH2R	PTH2R	PTH2R	0	0	1
Idh1	IDH1	IDH1	IDH1	0	0	1
Crygc	CRYGC	CRYGC	CRYGC	0	0	1
Klf7	KLF7	KLF7	KLF7	1	0	0
Fastkd2	FASTKD2	FASTKD2	FASTKD2	0	0	1
Adam23	ADAM23	ADAM23	ADAM23	1	0	0
Ndufs1	NDUFS1	NDUFS1	NDUFS1	1	0	0
Cps1	CPS1	CPS1	CPS1	1	0	0
Slc40a1	SLC40A1	SLC40A1	SLC40A1	1	0	0
Ikzf2	IKZF2	IKZF2	IKZF2	0	0	1
Carf	CARF	CARF	CARF	0	0	1
Ica1l	ICA1L	ICA1L	ICA1L	0	0	1
Wdr12	WDR12	WDR12	WDR12	1	0	0
Cdk15	CDK15	CDK15	CDK15	0	0	1
Cflar	CFLAR	CFLAR	CFLAR	1	0	0
Clk1	CLK1	CLK1	CLK1	0	0	1
Ptp4a1	PTP4A1	PTP4A1	PTP4A1	0	0	1
Slc9a4	SLC9A4	SLC9A4	SLC9A4	0	0	1
Il18rap	IL18RAP	IL18RAP	IL18RAP	0	0	1
Il1rl1	IL1RL1	IL1RL1	IL1RL1	0	0	1
Il1r2	IL1R2	IL1R2	IL1R2	0	0	1
Pms1	PMS1	PMS1	PMS1	0	0	1
Inpp1	INPP1	INPP1	INPP1	0	0	1
Stat1	STAT1	STAT1	STAT1	0	0	1
Coa5	COA5	COA5	COA5	1	0	0
Wnt10a	WNT10A	WNT10A	WNT10A	0	0	1
Rnf25	RNF25	RNF25	RNF25	0	0	1
Bcs1l	BCS1L	BCS1L	BCS1L	1	0	0
Plcd4	PLCD4	PLCD4	PLCD4	0	0	1
Ctdsp1	CTDSP1	CTDSP1	CTDSP1	0	0	1
Abcb6	ABCB6	ABCB6	ABCB6	0	0	1
Stk16	STK16	STK16	STK16	0	0	1
Dnajb2	DNAJB2	DNAJB2	DNAJB2	0	0	1
Slc23a3	SLC23A3	SLC23A3	SLC23A3	0	0	1
Dnpep	DNPEP	DNPEP	DNPEP	0	0	1
Stk11ip	STK11IP	STK11IP	STK11IP	1	0	0
Nmur1	NMUR1	NMUR1	NMUR1	0	0	1
Mrpl44	MRPL44	MRPL44	MRPL44	1	0	0
Efhd1	EFHD1	EFHD1	EFHD1	0	0	1
Ndufa10	NDUFA10	NDUFA10	NDUFA10	1	0	0
Bok	BOK	BOK	BOK	0	0	1
Atg16l1	ATG16L1	ATG16L1	ATG16L1	1	0	0
Iqca	IQCA1	IQCA1	IQCA1	0	0	1
Rab17	RAB17	RAB17	RAB17	0	0	1
Klhl30	KLHL30	KLHL30	KLHL30	0	0	1
Cdh7	CDH7	CDH7	CDH7	0	0	1
Htr4	HTR4	HTR4	HTR4	0	0	1
Gpr39	GPR39	GPR39	GPR39	0	0	1
Acmsd	ACMSD	ACMSD	ACMSD	0	0	1
Ccnt2	CCNT2	CCNT2	CCNT2	0	1	0
Lct	LCT	LCT	LCT	0	0	1
Steap3	STEAP3	STEAP3	STEAP3	0	0	1
Nek7	NEK7	NEK7	NEK7	1	0	0
Ddx59	DDX59	DDX59	DDX59	1	0	0
Cacna1s	CACNA1S	CACNA1S	CACNA1S	1	0	0
Il20	IL20	IL20	IL20	0	0	1
Tnni1	TNNI1	TNNI1	TNNI1	1	0	0
Il24	IL24	IL24	IL24	0	0	1
Slc45a3	SLC45A3	SLC45A3	SLC45A3	0	0	1
Klhl12	KLHL12	KLHL12	KLHL12	0	0	1
Adipor1	ADIPOR1	ADIPOR1	ADIPOR1	0	0	1
Tor1aip1	TOR1AIP1	TOR1AIP1	TOR1AIP1	1	0	0
Efcab2	EFCAB2	EFCAB2	EFCAB2	0	0	1
Parp1	PARP1	PARP1	PARP1	0	1	0
Acbd3	ACBD3	ACBD3	ACBD3	1	0	0
Srp9	SRP9	SRP9	SRP9	1	0	0
Cnih3	CNIH3	CNIH3	CNIH3	0	0	1
Slamf9	SLAMF9	SLAMF9	SLAMF9	0	0	1
Tada1	TADA1	TADA1	TADA1	1	0	0
Mpzl1	MPZL1	MPZL1	MPZL1	0	0	1
Dcaf6	DCAF6	DCAF6	DCAF6	0	0	1
Nme7	NME7	NME7	NME7	0	1	0
Ccdc181	CCDC181	CCDC181	CCDC181	0	0	1
Sell	SELL	SELL	SELL	0	0	1
Kifap3	KIFAP3	KIFAP3	KIFAP3	1	0	0
Sec16b	SEC16B	SEC16B	SEC16B	0	0	1
Ralgps2	RALGPS2	RALGPS2	RALGPS2	0	0	1
Smyd2	SMYD2	SMYD2	SMYD2	0	0	1
Ptpn14	PTPN14	PTPN14	PTPN14	0	0	1
Eprs	EPRS1	EPRS1	EPRS1	1	0	0
Iars2	IARS2	IARS2	IARS2	1	0	0
Lpgat1	LPGAT1	LPGAT1	LPGAT1	0	1	0
Tatdn3	TATDN3	TATDN3	TATDN3	0	0	1
Angel2	ANGEL2	ANGEL2	ANGEL2	0	0	1
Lamb3	LAMB3	LAMB3	LAMB3	0	0	1
Plxna2	PLXNA2	PLXNA2	PLXNA2	0	0	1
Nmt2	NMT2	NMT2	NMT2	0	0	1
Suv39h2	SUV39H2	SUV39H2	SUV39H2	0	0	1
Fam107b	FAM107B	FAM107B	FAM107B	0	0	1
Optn	OPTN	OPTN	OPTN	0	0	1
Rgs5	RGS5	RGS5	RGS5	0	0	1
Mgst3	MGST3	MGST3	MGST3	0	0	1
Cenpl	CENPL	CENPL	CENPL	1	0	0
Dars2	DARS2	DARS2	DARS2	1	0	0
Cubn	CUBN	CUBN	CUBN	1	0	0
Ppp6c	PPP6C	PPP6C	PPP6C	1	0	0
Arpc5l	ARPC5L	ARPC5L	ARPC5L	0	1	0
Lypd6b	LYPD6B	LYPD6B	LYPD6B	0	0	1
Itga8	ITGA8	ITGA8	ITGA8	0	1	0
Il2ra	IL2RA	IL2RA	IL2RA	0	0	1
Spopl	SPOPL	SPOPL	SPOPL	0	0	1
Prkcq	PRKCQ	PRKCQ	PRKCQ	0	0	1
Acbd5	ACBD5	ACBD5	ACBD5	0	0	1
Abi2	ABI2	ABI2	ABI2	0	0	1
Gad2	GAD2	GAD2	GAD2	0	0	1
Zbtb43	ZBTB43	ZBTB43	ZBTB43	0	0	1
Stxbp1	STXBP1	STXBP1	STXBP1	1	0	0
Coq4	COQ4	COQ4	COQ4	1	0	0
Spaca9	SPACA9	SPACA9	SPACA9	0	0	1
Gfi1b	GFI1B	GFI1B	GFI1B	1	0	0
Gtf3c5	GTF3C5	GTF3C5	GTF3C5	1	0	0
Dnm1	DNM1	DNM1	DNM1	1	0	0
Cytip	CYTIP	CYTIP	CYTIP	0	0	1
Acvr1c	ACVR1C	ACVR1C	ACVR1C	0	0	1
Lamc3	LAMC3	LAMC3	LAMC3	0	0	1
Usp20	USP20	USP20	USP20	0	0	1
Hspa5	HSPA5	HSPA5	HSPA5	1	0	0
Kynu	KYNU	KYNU	KYNU	0	0	1
Psmd5	PSMD5	PSMD5	PSMD5	0	0	1
Phf19	PHF19	PHF19	PHF19	0	0	1
Hc	C5	C5	C5	0	0	1
Lhx6	LHX6	LHX6	LHX6	0	1	0
Slc4a10	SLC4A10	SLC4A10	SLC4A10	0	0	1
Psmd14	PSMD14	PSMD14	PSMD14	1	0	0
Notch1	NOTCH1	NOTCH1	NOTCH1	1	0	0
Inpp5e	INPP5E	INPP5E	INPP5E	1	0	0
Gpsm1	GPSM1	GPSM1	GPSM1	0	0	1
Nacc2	NACC2	NACC2	NACC2	0	0	1
Grin1	GRIN1	GRIN1	GRIN1	1	0	0
Rbms1	RBMS1	RBMS1	RBMS1	1	0	0
Arrdc1	ARRDC1	ARRDC1	ARRDC1	0	0	1
Psd4	PSD4	PSD4	PSD4	0	0	1
Wdsub1	WDSUB1	WDSUB1	WDSUB1	0	1	0
Pkp4	PKP4	PKP4	PKP4	0	0	1
Cybrd1	CYBRD1	CYBRD1	CYBRD1	0	0	1
Zfp385b	ZNF385B	ZNF385B	ZNF385B	0	0	1
Abcb11	ABCB11	ABCB11	ABCB11	0	1	0
Slc43a3	SLC43A3	SLC43A3	SLC43A3	0	0	1
Med19	MED19	MED19	MED19	1	0	0
Chrna1	CHRNA1	CHRNA1	CHRNA1	1	0	0
Emc4	EMC4	EMC4	EMC4	1	0	0
Nop10	NOP10	NOP10	NOP10	1	0	0
Commd9	COMMD9	COMMD9	COMMD9	1	0	0
Traf6	TRAF6	TRAF6	TRAF6	1	0	0
Hipk3	HIPK3	HIPK3	HIPK3	0	0	1
Nat10	NAT10	NAT10	NAT10	1	0	0
Galk2	GALK2	GALK2	GALK2	0	0	1
Fgf7	FGF7	FGF7	FGF7	0	0	1
Tspan18	TSPAN18	TSPAN18	TSPAN18	0	0	1
Duoxa2	DUOXA2	DUOXA2	DUOXA2	0	0	1
Creb3l1	CREB3L1	CREB3L1	CREB3L1	0	0	1
Atg13	ATG13	ATG13	ATG13	1	0	0
Ell3	ELL3	ELL3	ELL3	0	0	1
F2	F2	F2	F2	0	1	0
Pacsin3	PACSIN3	PACSIN3	PACSIN3	0	0	1
Adal	ADAL	ADAL	ADAL	0	0	1
Tubgcp4	TUBGCP4	TUBGCP4	TUBGCP4	1	0	0
Lamp5	LAMP5	LAMP5	LAMP5	0	0	1
Slx4ip	SLX4IP	SLX4IP	SLX4IP	0	0	1
Snap23	SNAP23	SNAP23	SNAP23	1	0	0
Zfp106	ZNF106	ZNF106	ZNF106	0	0	1
Ubox5	UBOX5	UBOX5	UBOX5	0	0	1
Rtf1	RTF1	RTF1	RTF1	1	0	0
Atrn	ATRN	ATRN	ATRN	0	0	1
Siglec1	SIGLEC1	SIGLEC1	SIGLEC1	0	0	1
Rpusd2	RPUSD2	RPUSD2	RPUSD2	0	0	1
Knl1	KNL1	KNL1	KNL1	1	0	0
1700037H04Rik	C13H20orf27	C20orf27	C20orf27	0	0	1
Spef1	SPEF1	SPEF1	SPEF1	0	0	1
Knstrn	KNSTRN	KNSTRN	KNSTRN	0	0	1
Ivd	IVD	IVD	IVD	1	0	0
Tmco5	TMCO5A	TMCO5A	TMCO5A	0	0	1
Crls1	CRLS1	CRLS1	CRLS1	1	0	0
Usp50	USP50	USP50	USP50	1	0	0
Trpm7	TRPM7	TRPM7	TRPM7	1	0	0
Fahd2a	FAHD2A	FAHD2A	FAHD2A	0	0	1
Mrps5	MRPS5	MRPS5	MRPS5	1	0	0
Prom2	PROM2	PROM2	PROM2	0	0	1
Nphp1	NPHP1	NPHP1	NPHP1	0	0	1
Acoxl	ACOXL	ACOXL	ACOXL	0	0	1
Fbln7	FBLN7	FBLN7	FBLN7	0	0	1
Polr1b	POLR1B	POLR1B	POLR1B	1	0	0
Il1a	IL1A	IL1A	IL1A	0	0	1
Pdyn	PDYN	PDYN	PDYN	0	0	1
Tgm6	TGM6	TGM6	TGM6	0	0	1
Idh3b	IDH3B	IDH3B	IDH3B	0	0	1
Lpin3	LPIN3	LPIN3	LPIN3	0	0	1
Snx5	SNX5	SNX5	SNX5	0	0	1
Mgme1	MGME1	MGME1	MGME1	0	0	1
Kat14	KAT14	KAT14	KAT14	0	1	0
Polr3f	POLR3F	POLR3F	POLR3F	1	0	0
Slc52a3	SLC52A3	SLC52A3	SLC52A3	1	0	0
Kif3b	KIF3B	KIF3B	KIF3B	1	0	0
Sun5	SUN5	SUN5	SUN5	0	0	1
Bpifa3	BPIFA3	BPIFA3	BPIFA3	0	1	0
Bpifb1	BPIFB1	BPIFB1	BPIFB1	0	0	1
Fam210b	FAM210B	FAM210B	FAM210B	0	0	1
Aurka	AURKA	AURKA	AURKA	1	0	0
Rab22a	RAB22A	RAB22A	RAB22A	0	0	1
Chmp4c	CHMP4C	CHMP4C	CHMP4C	0	0	1
Atp9a	ATP9A	ATP9A	ATP9A	0	0	1
Lrrcc1	LRRCC1	LRRCC1	LRRCC1	0	0	1
Car13	CA13	CA13	CA13	0	0	1
Zgpat	ZGPAT	ZGPAT	ZGPAT	0	0	1
Zbtb46	ZBTB46	ZBTB46	ZBTB46	0	1	0
Raly	RALY	RALY	RALY	0	0	1
Itch	ITCH	ITCH	ITCH	0	0	1
Dnajc5b	DNAJC5B	DNAJC5B	DNAJC5B	0	0	1
Epb41l1	EPB41L1	EPB41L1	EPB41L1	0	0	1
Rbl1	RBL1	RBL1	RBL1	0	1	0
Rpn2	RPN2	RPN2	RPN2	1	0	0
Ghrh	GHRH	GHRH	GHRH	0	0	1
Src	SRC	SRC	SRC	0	1	0
Ralgapb	RALGAPB	RALGAPB	RALGAPB	1	0	0
Dhx35	DHX35	DHX35	DHX35	1	0	0
Skil	SKIL	SKIL	SKIL	0	0	1
Gnb4	GNB4	GNB4	GNB4	0	0	1
Ccdc39	CCDC39	CCDC39	CCDC39	0	1	0
Ncoa3	NCOA3	NCOA3	NCOA3	0	1	0
Slc2a2	SLC2A2	SLC2A2	SLC2A2	1	0	0
Pld1	PLD1	PLD1	PLD1	0	0	1
Ect2	ECT2	ECT2	ECT2	1	0	0
Exosc9	EXOSC9	EXOSC9	EXOSC9	1	0	0
Trpc3	TRPC3	TRPC3	TRPC3	1	0	0
Adad1	ADAD1	ADAD1	ADAD1	0	1	0
Spata5	SPATA5	SPATA5	SPATA5	1	0	0
Slc7a11	SLC7A11	SLC7A11	SLC7A11	0	0	1
Cog6	COG6	COG6	COG6	0	0	1
Ufm1	UFM1	UFM1	UFM1	1	0	0
Postn	POSTN	POSTN	POSTN	0	0	1
Exosc8	EXOSC8	EXOSC8	EXOSC8	1	0	0
Gfm1	GFM1	GFM1	GFM1	1	0	0
Il12a	IL12A	IL12A	IL12A	0	0	1
Ift80	IFT80	IFT80	IFT80	0	1	0
Tm4sf4	TM4SF4	TM4SF4	TM4SF4	0	0	1
Etfdh	ETFDH	ETFDH	ETFDH	1	0	0
Wnt2b	WNT2B	WNT2B	WNT2B	0	0	1
Nras	NRAS	NRAS	NRAS	1	0	0
Sike1	SIKE1	SIKE1	SIKE1	0	0	1
Vangl1	VANGL1	VANGL1	VANGL1	0	1	0
Casq2	CASQ2	CASQ2	CASQ2	1	0	0
Gdap2	GDAP2	GDAP2	GDAP2	0	0	1
Spag17	SPAG17	SPAG17	SPAG17	0	0	1
Hao2	HAO2	HAO2	HAO2	0	0	1
Sec22b	SEC22B	SEC22B	SEC22B	1	0	0
Gpsm2	GPSM2	GPSM2	GPSM2	0	1	0
Clcc1	CLCC1	CLCC1	CLCC1	1	0	0
Ampd2	AMPD2	AMPD2	AMPD2	0	1	0
Ahcyl1	AHCYL1	AHCYL1	AHCYL1	0	0	1
Slc16a4	SLC16A4	SLC16A4	SLC16A4	0	0	1
Dennd2d	DENND2D	DENND2D	DENND2D	0	1	0
Il6ra	IL6R	IL6R	IL6R	0	0	1
Chrnb2	CHRNB2	CHRNB2	CHRNB2	0	1	0
Adar	ADAR	ADAR	ADAR	1	0	0
Slc50a1	SLC50A1	SLC50A1	SLC50A1	0	0	1
Lef1	LEF1	LEF1	LEF1	1	0	0
Mcub	MCUB	MCUB	MCUB	0	0	1
Tlr2	TLR2	TLR2	TLR2	0	0	1
Lrat	LRAT	LRAT	LRAT	0	1	0
Asic5	ASIC5	ASIC5	ASIC5	0	0	1
Tdo2	TDO2	TDO2	TDO2	0	1	0
Ctso	CTSO	CTSO	CTSO	0	0	1
Ints12	INTS12	INTS12	INTS12	1	0	0
Gstcd	GSTCD	GSTCD	GSTCD	0	0	1
Glrb	GLRB	GLRB	GLRB	1	0	0
Enpep	ENPEP	ENPEP	ENPEP	0	0	1
Alpk1	ALPK1	ALPK1	ALPK1	0	0	1
Aimp1	AIMP1	AIMP1	AIMP1	0	0	1
Tbck	TBCK	TBCK	TBCK	0	1	0
Ifi44	IFI44	IFI44	IFI44	0	0	1
Efna4	EFNA4	EFNA4	EFNA4	0	0	1
Ash1l	ASH1L	ASH1L	ASH1L	1	0	0
Lmna	LMNA	LMNA	LMNA	1	0	0
Naxe	NAXE	NAXE	NAXE	0	0	1
Ntrk1	NTRK1	NTRK1	NTRK1	1	0	0
Pear1	PEAR1	PEAR1	PEAR1	0	0	1
Lrba	LRBA	LRBA	LRBA	0	0	1
Sh3d19	SH3D19	SH3D19	SH3D19	0	0	1
Rnf115	RNF115	RNF115	RNF115	0	0	1
Ecm1	ECM1	ECM1	ECM1	0	1	0
Ctsk	CTSK	CTSK	CTSK	0	0	1
Mettl14	METTL14	METTL14	METTL14	1	0	0
Abca4	ABCA4	ABCA4	ABCA4	0	0	1
Abcd3	ABCD3	ABCD3	ABCD3	0	0	1
Rwdd3	RWDD3	RWDD3	RWDD3	1	0	0
Snx27	SNX27	SNX27	SNX27	0	1	0
Adh5	ADH5	ADH5	ADH5	0	0	1
Ppp3ca	PPP3CA	PPP3CA	PPP3CA	0	0	1
Nfkb1	NFKB1	NFKB1	NFKB1	0	0	1
Bdh2	BDH2	BDH2	BDH2	0	0	1
Ctbs	CTBS	CTBS	CTBS	0	0	1
Ddah1	DDAH1	DDAH1	DDAH1	0	0	1
Mmp16	MMP16	MMP16	MMP16	0	0	1
Cyp7a1	CYP7A1	CYP7A1	CYP7A1	0	0	1
Gtf2b	GTF2B	GTF2B	GTF2B	1	0	0
Ube2j1	UBE2J1	UBE2J1	UBE2J1	0	0	1
Rragd	RRAGD	RRAGD	RRAGD	0	0	1
Map3k7	MAP3K7	MAP3K7	MAP3K7	1	0	0
Rars2	RARS2	RARS2	RARS2	1	0	0
Aldob	ALDOB	ALDOB	ALDOB	0	1	0
Rnf20	RNF20	RNF20	RNF20	1	0	0
Polr1e	POLR1E	POLR1E	POLR1E	1	0	0
Exosc3	EXOSC3	EXOSC3	EXOSC3	0	1	0
Ncbp1	NCBP1	NCBP1	NCBP1	1	0	0
Trmo	TRMO	TRMO	TRMO	0	0	1
Hemgn	HEMGN	HEMGN	HEMGN	0	0	1
Erp44	ERP44	ERP44	ERP44	0	1	0
Svep1	SVEP1	SVEP1	SVEP1	1	0	0
Ptgr1	PTGR1	PTGR1	PTGR1	0	0	1
Alad	ALAD	ALAD	ALAD	1	0	0
Ptprd	PTPRD	PTPRD	PTPRD	0	1	0
Mpdz	MPDZ	MPDZ	MPDZ	0	0	1
Aptx	APTX	APTX	APTX	0	0	1
Slc44a1	SLC44A1	SLC44A1	SLC44A1	0	0	1
Epb41l4b	EPB41L4B	EPB41L4B	EPB41L4B	0	0	1
Aqp3	AQP3	AQP3	AQP3	0	0	1
Ubap1	UBAP1	UBAP1	UBAP1	1	0	0
Kif24	KIF24	KIF24	KIF24	0	0	1
Pigo	PIGO	PIGO	PIGO	1	0	0
Unc13b	UNC13B	UNC13B	UNC13B	0	1	0
Creb3	CREB3	CREB3	CREB3	0	1	0
Gba2	GBA2	GBA2	GBA2	0	0	1
Rgp1	RGP1	RGP1	RGP1	1	0	0
Sh3gl2	SH3GL2	SH3GL2	SH3GL2	0	0	1
Plin2	PLIN2	PLIN2	PLIN2	0	0	1
Mllt3	MLLT3	MLLT3	MLLT3	1	0	0
Usp24	USP24	USP24	USP24	0	0	1
Prkaa2	PRKAA2	PRKAA2	PRKAA2	0	0	1
Slc35d1	SLC35D1	SLC35D1	SLC35D1	1	0	0
Mier1	MIER1	MIER1	MIER1	0	0	1
Sgip1	SGIP1	SGIP1	SGIP1	0	0	1
Cachd1	CACHD1	CACHD1	CACHD1	0	1	0
Dph2	DPH2	DPH2	DPH2	1	0	0
Eps15	EPS15	EPS15	EPS15	0	0	1
Ttc39a	TTC39A	TTC39A	TTC39A	0	0	1
Osbpl9	OSBPL9	OSBPL9	OSBPL9	0	0	1
Tm2d1	TM2D1	TM2D1	TM2D1	1	0	0
Hook1	HOOK1	HOOK1	HOOK1	0	0	1
Fggy	FGGY	FGGY	FGGY	0	0	1
Ift74	IFT74	IFT74	IFT74	0	0	1
Laptm5	LAPTM5	LAPTM5	LAPTM5	0	0	1
Orc1	ORC1	ORC1	ORC1	1	0	0
Gpx7	GPX7	GPX7	GPX7	0	0	1
Podn	PODN	PODN	PODN	0	0	1
Cpt2	CPT2	CPT2	CPT2	0	1	0
Exo5	EXO5	EXO5	EXO5	0	0	1
Edn2	EDN2	EDN2	EDN2	1	0	0
Ccdc30	CCDC30	CCDC30	CCDC30	0	0	1
P3h1	P3H1	P3H1	P3H1	0	0	1
Ermap	TMEM269	ERMAP	ERMAP	0	0	1
Trit1	TRIT1	TRIT1	TRIT1	1	0	0
Mfsd2a	MFSD2A	MFSD2A	MFSD2A	0	1	0
Fuca1	FUCA1	FUCA1	FUCA1	0	0	1
Kif2c	KIF2C	KIF2C	KIF2C	1	0	0
Ptch2	PTCH2	PTCH2	PTCH2	0	0	1
Toe1	TOE1	TOE1	TOE1	1	0	0
Mmachc	MMACHC	MMACHC	MMACHC	0	1	0
Ipp	IPP	IPP	IPP	0	0	1
Cyp4b1	CYP4B1	CYP4B1	CYP4B1	0	0	1
Cfap57	CFAP57	CFAP57	CFAP57	0	0	1
Capzb	CAPZB	CAPZB	CAPZB	1	0	0
Pla2g2c	PLA2G2C	PLA2G2C	PLA2G2C	0	0	1
Pla2g2e	PLA2G2E	PLA2G2E	PLA2G2E	0	0	1
Vwa5b1	VWA5B1	VWA5B1	VWA5B1	0	0	1
Pink1	PINK1	PINK1	PINK1	0	0	1
Ddost	DDOST	DDOST	DDOST	1	0	0
Hp1bp3	HP1BP3	HP1BP3	HP1BP3	0	1	0
Ptpn12	PTPN12	PTPN12	PTPN12	1	0	0
Pef1	PEF1	PEF1	PEF1	0	0	1
Adgrb2	ADGRB2	ADGRB2	ADGRB2	0	0	1
Ptp4a2	PTP4A2	PTP4A2	PTP4A2	0	0	1
Yars	YARS1	YARS1	YARS1	1	0	0
AU040320	KIAA0319L	KIAA0319L	KIAA0319L	0	0	1
Csf3r	CSF3R	CSF3R	CSF3R	0	1	0
Wasf2	WASF2	WASF2	WASF2	1	0	0
Rspo1	RSPO1	RSPO1	RSPO1	0	0	1
Mtf1	MTF1	MTF1	MTF1	1	0	0
Epb41	EPB41	EPB41	EPB41	0	1	0
Ptpru	PTPRU	PTPRU	PTPRU	0	0	1
Mecr	MECR	MECR	MECR	1	0	0
Srsf4	SRSF4	SRSF4	SRSF4	0	1	0
Plekhm2	PLEKHM2	PLEKHM2	PLEKHM2	0	0	1
Cdk14	CDK14	CDK14	CDK14	0	0	1
Padi2	PADI2	PADI2	PADI2	0	1	0
Psmc2	PSMC2	PSMC2	PSMC2	1	0	0
Galntl5	GALNTL5	GALNTL5	GALNTL5	0	0	1
Prkag2	PRKAG2	PRKAG2	PRKAG2	0	0	1
Smarcd3	SMARCD3	SMARCD3	SMARCD3	1	0	0
Fastk	FASTK	FASTK	FASTK	0	0	1
Uts2	UTS2	UTS2	UTS2	0	0	1
Tnfrsf9	TNFRSF9	TNFRSF9	TNFRSF9	0	1	0
Nos3	NOS3	NOS3	NOS3	0	0	1
Mtor	MTOR	MTOR	MTOR	1	0	0
Rint1	RINT1	RINT1	RINT1	1	0	0
Fbxo44	FBXO44	FBXO44	FBXO44	0	0	1
Mad2l2	MAD2L2	MAD2L2	MAD2L2	1	0	0
Pmpcb	PMPCB	PMPCB	PMPCB	1	0	0
Mfn2	MFN2	MFN2	MFN2	1	0	0
Trp73	TP73	TP73	TP73	0	1	0
Dffb	DFFB	DFFB	DFFB	0	0	1
Rer1	RER1	RER1	RER1	1	0	0
Morn1	MORN1	MORN1	MORN1	0	0	1
Mmp23	MMP23	MMP23B	MMP23B	0	0	1
Ttll10	TTLL10	TTLL10	TTLL10	0	0	1
Kcnip4	KCNIP4	KCNIP4	KCNIP4	0	0	1
Htra3	HTRA3	HTRA3	HTRA3	0	0	1
Acox3	ACOX3	ACOX3	ACOX3	0	0	1
Nelfa	NELFA	NELFA	NELFA	1	0	0
Stx18	STX18	STX18	STX18	1	0	0
Nsg1	NSG1	NSG1	NSG1	0	0	1
Eif2b4	EIF2B4	EIF2B4	EIF2B4	1	0	0
Nrbp1	NRBP1	NRBP1	NRBP1	1	0	0
Slc35f6	SLC35F6	SLC35F6	SLC35F6	0	0	1
Anapc4	ANAPC4	ANAPC4	ANAPC4	1	0	0
Fam114a1	FAM114A1	FAM114A1	FAM114A1	0	0	1
Sel1l3	SEL1L3	SEL1L3	SEL1L3	0	0	1
Rfc1	RFC1	RFC1	RFC1	1	0	0
Gnpda2	GNPDA2	GNPDA2	GNPDA2	0	0	1
Gabrb1	GABRB1	GABRB1	GABRB1	0	0	1
Chic2	CHIC2	CHIC2	CHIC2	0	1	0
Tmem165	TMEM165	TMEM165	TMEM165	0	0	1
Nmu	NMU	NMU	NMU	0	0	1
Epha5	EPHA5	EPHA5	EPHA5	0	0	1
Rest	RESTB	REST	REST	1	0	0
Sult1b1	SULT1B1	SULT1B1	SULT1B1	0	0	1
Rufy3	RUFY3	RUFY3	RUFY3	1	0	0
Spp1	SPP1	SPP1	SPP1	0	0	1
Hsd17b11	HSD17B11	HSD17B11	HSD17B11	0	0	1
Klhl8	KLHL8	KLHL8	KLHL8	0	0	1
Coq2	COQ2	COQ2	COQ2	1	0	0
Plac8	PLAC8B	PLAC8	PLAC8	0	0	1
Crybb3	CRYBB3	CRYBB3	CRYBB3	0	0	1
Mthfd2l	MTHFD2L	MTHFD2L	MTHFD2L	0	0	1
Areg	AREG	AREG	AREG	0	0	1
Ccng2	CCNG2	CCNG2	CCNG2	0	0	1
Ddx55	DDX55	DDX55	DDX55	1	0	0
Rilpl1	RILPL1	RILPL1	RILPL1	0	0	1
Rilpl2	RILPL2	RILPL2	RILPL2	0	0	1
Cdkl2	CDKL2	CDKL2	CDKL2	0	0	1
G3bp2	G3BP2	G3BP2	G3BP2	1	0	0
Abcb9	ABCB9	ABCB9	ABCB9	0	0	1
Naaa	NAAA	NAAA	NAAA	0	0	1
Kntc1	KNTC1	KNTC1	KNTC1	0	1	0
Cxcl9	CXCL9	CXCL9	CXCL9	0	0	1
Rimbp2	RIMBP2	RIMBP2	RIMBP2	0	0	1
Scarb2	SCARB2	SCARB2	SCARB2	0	0	1
Stx2	STX2	STX2	STX2	0	0	1
Bcl7a	BCL7A	BCL7A	BCL7A	1	0	0
Psph	PSPH	PSPH	PSPH	1	0	0
Tmem116	TMEM116	TMEM116	TMEM116	0	0	1
Fam216a	FAM216A	FAM216A	FAM216A	0	0	1
Arpc3	ARPC3	ARPC3	ARPC3	1	0	0
Atp2a2	ATP2A2	ATP2A2	ATP2A2	1	0	0
P2rx7	P2RX7	P2RX7	P2RX7	0	0	1
Ift81	IFT81	IFT81	IFT81	1	0	0
P2rx4	P2RX4	P2RX4	P2RX4	0	0	1
Anxa3	ANXA3	ANXA3	ANXA3	0	0	1
Pde6b	PDE6B	PDE6B	PDE6B	0	0	1
Pgam5	PGAM5	PGAM5	PGAM5	0	0	1
Ankle2	ANKLE2	ANKLE2	ANKLE2	0	1	0
Golga3	GOLGA3	GOLGA3	GOLGA3	0	0	1
Ddx51	DDX51	DDX51	DDX51	1	0	0
Rab35	RAB35	RAB35	RAB35	1	0	0
Sirt4	SIRT4	SIRT4	SIRT4	0	0	1
2210016L21Rik	C17H12orf43	C12orf43	C12orf43	0	0	1
Snx8	SNX8	SNX8	SNX8	0	0	1
Tmem106b	TMEM106B	TMEM106B	TMEM106B	0	0	1
Fscn1	FSCN1	FSCN1	FSCN1	0	1	0
Usp30	USP30	USP30	USP30	0	0	1
Sdsl	SDSL	SDSL	SDSL	0	0	1
Ddx54	DDX54	DDX54	DDX54	1	0	0
Rasal1	RASAL1	RASAL1	RASAL1	0	0	1
Rph3a	RPH3A	RPH3A	RPH3A	0	0	1
Eif2ak1	EIF2AK1	EIF2AK1	EIF2AK1	0	0	1
Cdk8	CDK8	CDK8	CDK8	1	0	0
Usp12	USP12	USP12	USP12	0	0	1
Pdx1	PDX1	PDX1	PDX1	1	0	0
C8b	C8B	C8B	C8B	0	0	1
Medag	MEDAG	MEDAG	MEDAG	0	0	1
Col1a2	COL1A2	COL1A2	COL1A2	0	0	1
Wnt16	WNT16	WNT16	WNT16	0	0	1
Auts2	AUTS2	AUTS2	AUTS2	1	0	0
Hyal4	HYAL4	HYAL4	HYAL4	0	0	1
Bcl7b	BCL7B	BCL7B	BCL7B	0	0	1
Asb15	ASB15	ASB15	ASB15	0	0	1
Aass	AASS	AASS	AASS	0	0	1
Pax4	PAX4	PAX4	PAX4	1	0	0
Gnb2	GNB2	GNB2	GNB2	0	0	1
Tfr2	TFR2	TFR2	TFR2	0	0	1
Agfg2	AGFG2	AGFG2	AGFG2	0	0	1
Ppp1r35	PPP1R35	PPP1R35	PPP1R35	1	0	0
Nobox	NOBOX	NOBOX	NOBOX	0	1	0
Irf5	IRF5	IRF5	IRF5	0	0	1
Hibadh	HIBADH	HIBADH	HIBADH	0	0	1
Gars	GARS1	GARS1	GARS1	1	0	0
Adcyap1r1	ADCYAP1R1	ADCYAP1R1	ADCYAP1R1	0	1	0
Tmem209	TMEM209	TMEM209	TMEM209	0	1	0
Cep41	CEP41	CEP41	CEP41	0	0	1
Herc6	HERC6	HERC6	HERC6	0	0	1
Igf2bp3	IGF2BP3	IGF2BP3	IGF2BP3	0	0	1
Gpnmb	GPNMB	GPNMB	GPNMB	0	0	1
Tra2a	TRA2A	TRA2A	TRA2A	0	1	0
Gsdme	GSDME	GSDME	GSDME	0	0	1
Osbpl3	OSBPL3	OSBPL3	OSBPL3	0	0	1
Ssbp1	SSBP1	SSBP1	SSBP1	1	0	0
Prdm5	PRDM5	PRDM5	PRDM5	0	0	1
Hpgds	HPGDS	HPGDS	HPGDS	0	0	1
Smarcad1	SMARCAD1	SMARCAD1	SMARCAD1	0	1	0
Rab19	RAB19	RAB19	RAB19	0	0	1
Gfpt1	GFPT1	GFPT1	GFPT1	1	0	0
Dusp11	DUSP11	DUSP11	DUSP11	0	0	1
Adamts9	ADAMTS9	ADAMTS9	ADAMTS9	0	1	0
Lrig1	LRIG1	LRIG1	LRIG1	0	0	1
Mogs	MOGS	MOGS	MOGS	1	0	0
Bmp10	BMP10	BMP10	BMP10	1	0	0
Arhgap25	ARHGAP25	ARHGAP25	ARHGAP25	0	0	1
Gkn2	GKN2	GKN2	GKN2	0	0	1
Gkn1	GKN1	GKN1	GKN1	0	0	1
Rab43	RAB43	RAB43	RAB43	0	0	1
Cnbp	CNBP	CNBP	CNBP	1	0	0
Frmd4b	FRMD4B	FRMD4B	FRMD4B	0	0	1
Cntn3	CNTN3	CNTN3	CNTN3	0	0	1
Aldh1l1	ALDH1L1	ALDH1L1	ALDH1L1	0	0	1
Slc41a3	SLC41A3	SLC41A3	SLC41A3	0	0	1
Cntn6	CNTN6	CNTN6	CNTN6	0	0	1
Tmem43	TMEM43	TMEM43	TMEM43	0	0	1
Sumf1	SUMF1	SUMF1	SUMF1	0	1	0
Itpr1	ITPR1	ITPR1	ITPR1	0	1	0
Bhlhe40	BHLHE40	BHLHE40	BHLHE40	0	0	1
Arl8b	ARL8B	ARL8B	ARL8B	0	1	0
Lrrc23	LRRC23	LRRC23	LRRC23	0	0	1
Cops7a	COPS7A	COPS7A	COPS7A	0	0	1
Rasgef1a	RASGEF1A	RASGEF1A	RASGEF1A	0	0	1
Tuba8	TUBA8	TUBA8	TUBA8	0	0	1
Gabarapl1	GABARAPL1	GABARAPL1	GABARAPL1	0	0	1
Erc1	ERC1	ERC1	ERC1	1	0	0
Ccdc77	CCDC77	CCDC77	CCDC77	0	0	1
Kdm5a	KDM5A	KDM5A	KDM5A	1	0	0
Dusp16	DUSP16	DUSP16	DUSP16	0	0	1
Gprc5d	GPRC5D	GPRC5D	GPRC5D	0	0	1
Plbd1	PLBD1	PLBD1	PLBD1	0	0	1
Art4	ART4	ART4	ART4	0	0	1
Plcz1	PLCZ1	PLCZ1	PLCZ1	0	0	1
Gys2	GYS2	GYS2	GYS2	0	0	1
Rad18	RAD18	RAD18	RAD18	0	0	1
Sspn	SSPN	SSPN	SSPN	0	0	1
Rassf8	RASSF8	RASSF8	RASSF8	0	1	0
Camk1	CAMK1	CAMK1	CAMK1	0	0	1
Etnk1	ETNK1	ETNK1	ETNK1	0	0	1
Emc3	EMC3	EMC3	EMC3	1	0	0
Far2	FAR2	FAR2	FAR2	0	0	1
Caprin2	CAPRIN2	CAPRIN2	CAPRIN2	0	0	1
Vgll4	VGLL4	VGLL4	VGLL4	1	0	0
Cand2	CAND2	CAND2	CAND2	0	0	1
Ing4	ING4	ING4	ING4	0	0	1
Tnfrsf1a	TNFRSF1A	TNFRSF1A	TNFRSF1A	0	0	1
D6Wsu163e	C5H12orf4	C12orf4	C12orf4	0	0	1
Prmt8	PRMT8	PRMT8	PRMT8	0	0	1
Uri1	URI1	URI1	URI1	0	0	1
Pop4	POP4	POP4	POP4	1	0	0
Sbk2	SBK2	SBK2	SBK2	0	0	1
Lypd5	LYPD5	LYPD5	LYPD5	0	0	1
Slc17a6	SLC17A6	SLC17A6	SLC17A6	1	0	0
Prmt3	PRMT3	PRMT3	PRMT3	0	1	0
Crtc3	CRTC3	CRTC3	CRTC3	0	1	0
Furin	FURIN	FURIN	FURIN	1	0	0
Hddc3	HDDC3	HDDC3	HDDC3	0	0	1
Unc45a	UNC45A	UNC45A	UNC45A	1	0	0
Iqgap1	IQGAP1	IQGAP1	IQGAP1	0	0	1
Cib1	CIB1	CIB1	CIB1	0	0	1
Idh2	IDH2	IDH2	IDH2	0	0	1
Synm	SYNM	SYNM	SYNM	0	0	1
Cd22	CD22	CD22	CD22	0	0	1
Dpf1	DPF1	DPF1	DPF1	0	0	1
Rasgrp4	RASGRP4	RASGRP4	RASGRP4	0	0	1
Acan	ACAN	ACAN	ACAN	1	0	0
Tmem126a	TMEM126A	TMEM126A	TMEM126A	0	0	1
Ccdc83	CCDC83	CCDC83	CCDC83	0	0	1
Me3	ME3	ME3	ME3	0	0	1
Smg1	SMG1	SMG1	SMG1	1	0	0
Pik3c2a	PIK3C2A	PIK3C2A	PIK3C2A	1	0	0
Calcb	CALCA	CALCB	CALCB	0	0	1
Cyp2r1	CYP2R1	CYP2R1	CYP2R1	0	0	1
Pde3b	PDE3B	PDE3B	PDE3B	0	0	1
Cdipt	CDIPT	CDIPT	CDIPT	1	0	0
Sez6l2	SEZ6L2	SEZ6L2	SEZ6L2	0	0	1
Kctd13	KCTD13	KCTD13	KCTD13	0	0	1
Stard10	STARD10	STARD10	STARD10	0	0	1
Coro1a	CORO1A	CORO1A	CORO1A	0	0	1
Atp2a1	ATP2A1	ATP2A1	ATP2A1	1	0	0
Slco2b1	SLCO2B1	SLCO2B1	SLCO2B1	0	0	1
Myo7a	MYO7A	MYO7A	MYO7A	0	0	1
Lcmt1	LCMT1	LCMT1	LCMT1	1	0	0
Arhgap17	ARHGAP17	ARHGAP17	ARHGAP17	0	0	1
Slc5a2	SLC5A2	SLC5A2	SLC5A2	0	0	1
Dkkl1	DKKL1	DKKL1	DKKL1	0	0	1
Fus	FUS	FUS	FUS	1	0	0
Prss8	PRSS8	PRSS8	PRSS8	1	0	0
Phkg2	PHKG2	PHKG2	PHKG2	0	1	0
Ush1c	USH1C	USH1C	USH1C	0	0	1
Bag3	BAG3	BAG3	BAG3	1	0	0
Ptpn5	PTPN5	PTPN5	PTPN5	0	0	1
Acadsb	ACADSB	ACADSB	ACADSB	0	0	1
Chp2	CHP2	CHP2	CHP2	0	1	0
Plk1	PLK1	PLK1	PLK1	1	0	0
Dctn5	DCTN5	DCTN5	DCTN5	1	0	0
Ears2	EARS2	EARS2	EARS2	1	0	0
Scnn1b	SCNN1B	SCNN1B	SCNN1B	1	0	0
Arfip2	ARFIP2	ARFIP2	ARFIP2	0	0	1
Rrp8	RRP8	RRP8	RRP8	0	1	0
Vwa3a	VWA3A	VWA3A	VWA3A	0	0	1
Ilk	ILK	ILK	ILK	1	0	0
Crym	CRYM	CRYM	CRYM	0	0	1
Anks4b	ANKS4B	ANKS4B	ANKS4B	0	0	1
Fam53b	FAM53B	FAM53B	FAM53B	0	0	1
Abraxas2	ABRAXAS2	ABRAXAS2	ABRAXAS2	0	0	1
Trim21	TRIM21	TRIM21	TRIM21	0	0	1
Rrm1	RRM1	RRM1	RRM1	0	1	0
Knop1	KNOP1	KNOP1	KNOP1	0	0	1
Bccip	BCCIP	BCCIP	BCCIP	1	0	0
Pgap2	PGAP2	PGAP2	PGAP2	1	0	0
D7Ertd443e	C26H10orf90	C10orf90	C10orf90	0	0	1
Wee1	WEE1	WEE1	WEE1	1	0	0
Tmem9b	TMEM9B	TMEM9B	TMEM9B	0	1	0
Akip1	AKIP1	AKIP1	AKIP1	0	0	1
Glrx3	GLRX3	GLRX3	GLRX3	1	0	0
Fgf3	FGF3	FGF3	FGF3	1	0	0
Fadd	FADD	FADD	FADD	1	0	0
Cttn	CTTN	CTTN	CTTN	0	0	1
Nadsyn1	NADSYN1	NADSYN1	NADSYN1	0	0	1
Tnni2	TNNI2	TNNI2	TNNI2	1	0	0
Slc25a14	SLC25A14	SLC25A14	SLC25A14	0	0	1
Slc9a9	SLC9A9	SLC9A9	SLC9A9	0	0	1
Cacna1f	CACNA1F	CACNA1F	CACNA1F	0	0	1
Praf2	PRAF2	PRAF2	PRAF2	0	0	1
Rab39b	RAB39B	RAB39B	RAB39B	0	0	1
Msn	MSN	MSN	MSN	0	0	1
Stard8	STARD8	STARD8	STARD8	0	0	1
Awat2	AWAT2	AWAT2	AWAT2	0	0	1
Pbdc1	PBDC1	PBDC1	PBDC1	0	0	1
Tbx22	TBX22	TBX22	TBX22	0	0	1
Xkrx	XKRX	XKRX	XKRX	0	0	1
Serpina7	SERPINA7	SERPINA7	SERPINA7	0	0	1
Acsl4	ACSL4	ACSL4	ACSL4	0	1	0
Dcx	DCX	DCX	DCX	0	0	1
Nlgn3	NLGN3	NLGN3	NLGN3	0	0	1
Bgn	BGN	BGN	BGN	0	0	1
Naa10	NAA10	NAA10	NAA10	0	0	1
Irak1	IRAK1	IRAK1	IRAK1	0	0	1
Atp11a	ATP11A	ATP11A	ATP11A	1	0	0
Mcf2l	MCF2L	MCF2L	MCF2L	0	0	1
F7	F7	F7	F7	0	1	0
F10	F10	F10	F10	1	0	0
1700029H14Rik	C12H13orf46	C13orf46	C13orf46	0	0	1
Angpt2	ANGPT2	ANGPT2	ANGPT2	0	1	0
Nek3	NEK3	NEK3	NEK3	0	0	1
Thsd1	THSD1	THSD1	THSD1	0	0	1
Slc25a15	SLC25A15	SLC25A15	SLC25A15	1	0	0
Erlin2	ERLIN2	ERLIN2	ERLIN2	0	0	1
Col4a2	COL4A2	COL4A2	COL4A2	1	0	0
Ankrd10	ANKRD10	ANKRD10	ANKRD10	0	1	0
Arhgef7	ARHGEF7	ARHGEF7	ARHGEF7	1	0	0
Tex29	TEX29	TEX29	TEX29	0	0	1
Dctn6	DCTN6	DCTN6	DCTN6	1	0	0
Saraf	SARAF	SARAF	SARAF	0	0	1
Dkk4	DKK4	DKK4	DKK4	0	0	1
Polb	POLB	POLB	POLB	1	0	0
Ikbkb	IKBKB	IKBKB	IKBKB	0	1	0
Plat	PLAT	PLAT	PLAT	0	0	1
Ap3m2	AP3M2	AP3M2	AP3M2	0	0	1
Gins4	GINS4	GINS4	GINS4	1	0	0
Ido2	IDO2	IDO2	IDO2	0	0	1
Ido1	IDO1	IDO1	IDO1	0	0	1
Dctd	DCTD	DCTD	DCTD	0	0	1
Fgfr1	FGFR1	FGFR1	FGFR1	1	0	0
Ash2l	ASH2L	ASH2L	ASH2L	1	0	0
Tti2	TTI2	TTI2	TTI2	1	0	0
Gtf2e2	GTF2E2	GTF2E2	GTF2E2	1	0	0
Pcm1	PCM1	PCM1	PCM1	0	0	1
Pdgfrl	PDGFRL	PDGFRL	PDGFRL	0	0	1
Klhl2	KLHL2	KLHL2	KLHL2	0	0	1
Ednra	EDNRA	EDNRA	EDNRA	1	0	0
Sorbs2	SORBS2	SORBS2	SORBS2	0	0	1
Nek1	NEK1	NEK1	NEK1	0	0	1
Rbl2	RBL2	RBL2	RBL2	0	1	0
Aktip	AKTIP	AKTIP	AKTIP	0	0	1
Setd6	SETD6	SETD6	SETD6	0	0	1
Orc6	ORC6	ORC6	ORC6	1	0	0
Ucp1	UCP1	UCP1	UCP1	0	0	1
Il15	IL15	IL15	IL15	0	0	1
Dhodh	DHODH	DHODH	DHODH	1	0	0
Ap1g1	AP1G1	AP1G1	AP1G1	1	0	0
Irx3	IRX3	IRX3	IRX3	0	0	1
Amfr	AMFR	AMFR	AMFR	0	1	0
Arl2bp	ARL2BP	ARL2BP	ARL2BP	0	0	1
Cx3cl1	CX3CL1	CX3CL1	CX3CL1	0	0	1
Drc7	DRC7	DRC7	DRC7	0	0	1
Katnb1	KATNB1	KATNB1	KATNB1	1	0	0
Kifc3	KIFC3	KIFC3	KIFC3	0	0	1
Mmp15	MMP15	MMP15	MMP15	0	0	1
Cox4i1	COX4I1	COX4I1	COX4I1	1	0	0
Emc8	EMC8	EMC8	EMC8	1	0	0
Crispld2	CRISPLD2	CRISPLD2	CRISPLD2	1	0	0
Usp10	USP10	USP10	USP10	1	0	0
Cotl1	COTL1	COTL1	COTL1	0	0	1
Necab2	OSGIN1	NECAB2	NECAB2	0	0	1
Cdh13	CDH13	CDH13	CDH13	0	0	1
Mau2	MAU2	MAU2	MAU2	1	0	0
Ints10	INTS10	INTS10	INTS10	1	0	0
Nae1	NAE1	NAE1	NAE1	1	0	0
Rrad	RRAD	RRAD	RRAD	0	0	1
Car7	CA7	CA7	CA7	0	0	1
Nfatc3	NFATC3	NFATC3	NFATC3	1	0	0
Has3	HAS3	HAS3	HAS3	0	0	1
Maml2	MAML2	MAML2	MAML2	0	0	1
1700012B09Rik	C15H11orf97	C11orf97	C11orf97	0	0	1
Izumo1r	IZUMO1R	IZUMO1R	IZUMO1R	0	0	1
Panx1	PANX1	PANX1	PANX1	0	0	1
4931406C07Rik	C29H11orf54	C11orf54	C11orf54	0	0	1
Kars	KARS1	KARS1	KARS1	1	0	0
Gabarapl2	GABARAPL2	GABARAPL2	GABARAPL2	1	0	0
Wdr59	WDR59	WDR59	WDR59	1	0	0
Cog2	COG2	COG2	COG2	1	0	0
Arv1	ARV1	ARV1	ARV1	0	0	1
Jam3	JAM3	JAM3	JAM3	0	1	0
St14	ST14	ST14	ST14	1	0	0
Aplp2	APLP2	APLP2	APLP2	0	0	1
Trpc6	TRPC6	TRPC6	TRPC6	0	0	1
Sesn3	SESN3	SESN3	SESN3	0	0	1
Usp2	USP2	USP2	USP2	0	0	1
Trim29	TRIM29	TRIM29	TRIM29	0	0	1
Oaf	OAF	OAF	OAF	0	0	1
Pou2f3	POU2F3	POU2F3	POU2F3	0	0	1
Rexo2	REXO2	REXO2	REXO2	1	0	0
Cul5	CUL5	CUL5	CUL5	1	0	0
Barx2	BARX2	BARX2	BARX2	0	1	0
Dcps	DCPS	DCPS	DCPS	1	0	0
Rdx	RDX	RDX	RDX	0	1	0
Fdx1	FDX1	FDX1	FDX1	1	0	0
Dixdc1	DIXDC1	DIXDC1	DIXDC1	0	0	1
Plet1	C15H11orf34	PLET1	PLET1	0	0	1
Cadm1	CADM1	CADM1	CADM1	0	0	1
Il10ra	IL10RA	IL10RA	IL10RA	0	0	1
Mpzl2	MPZL2	MPZL2	MPZL2	0	0	1
Ddx6	DDX6	DDX6	DDX6	1	0	0
Pdzd3	PDZD3	PDZD3	PDZD3	0	0	1
Hmbs	HMBS	HMBS	HMBS	1	0	0
Vps11	VPS11	VPS11	VPS11	1	0	0
Mcam	MCAM	MCAM	MCAM	0	0	1
Icam5	ICAM5	ICAM5	ICAM5	0	0	1
Tyk2	TYK2	TYK2	TYK2	0	0	1
Scg3	SCG3	SCG3	SCG3	0	0	1
Carm1	CARM1	CARM1	CARM1	1	0	0
Gnb5	GNB5	GNB5	GNB5	0	1	0
Ldlr	LDLR	LDLR	LDLR	0	0	1
Nedd4	NEDD4	NEDD4	NEDD4	1	0	0
Gcnt3	GCNT3	GCNT3	GCNT3	0	0	1
Rora	RORA	RORA	RORA	0	1	0
Cln6	CLN6	CLN6	CLN6	0	0	1
Phip	PHIP	PHIP	PHIP	1	0	0
Bckdhb	BCKDHB	BCKDHB	BCKDHB	1	0	0
Htr3a	HTR3A	HTR3A	HTR3A	0	0	1
Dnaja4	DNAJA4	DNAJA4	DNAJA4	0	0	1
Crabp1	CRABP1	CRABP1	CRABP1	0	0	1
Neil1	NEIL1	NEIL1	NEIL1	0	0	1
Cyp11a1	CYP11A1	CYP11A1	CYP11A1	1	0	0
Tmem30a	TMEM30A	TMEM30A	TMEM30A	1	0	0
Hmg20a	HMG20A	HMG20A	HMG20A	1	0	0
Loxl1	LOXL1	LOXL1	LOXL1	0	0	1
Nptn	NPTN	NPTN	NPTN	0	0	1
Rasgrf1	RASGRF1	RASGRF1	RASGRF1	0	0	1
Ctsh	CTSH	CTSH	CTSH	0	0	1
Lactb	LACTB	LACTB	LACTB	0	0	1
Car12	CA12	CA12	CA12	0	0	1
Plod2	PLOD2	PLOD2	PLOD2	1	0	0
Usp3	USP3	USP3	USP3	0	1	0
Dapk2	DAPK2	DAPK2	DAPK2	0	0	1
Parp16	PARP16	PARP16	PARP16	0	0	1
Zwilch	ZWILCH	ZWILCH	ZWILCH	1	0	0
Atr	ATR	ATR	ATR	1	0	0
Me1	ME1	ME1	ME1	0	0	1
Cmtm6	CMTM6	CMTM6	CMTM6	0	0	1
Eomes	EOMES	EOMES	EOMES	1	0	0
Clstn2	CLSTN2	CLSTN2	CLSTN2	0	0	1
Copb2	COPB2	COPB2	COPB2	1	0	0
Mrps22	MRPS22	MRPS22	MRPS22	1	0	0
Pik3cb	PIK3CB	PIK3CB	PIK3CB	0	1	0
Dbr1	DBR1	DBR1	DBR1	1	0	0
Cldn18	CLDN18	CLDN18	CLDN18	0	0	1
Nck1	NCK1	NCK1	NCK1	0	0	1
Nme6	NME6	NME6	NME6	1	0	0
Dhx30	DHX30	DHX30	DHX30	1	0	0
Pth1r	PTH1R	PTH1R	PTH1R	1	0	0
Mlh1	MLH1	MLH1	MLH1	0	0	1
Trib1	TRIB1	TRIB1	TRIB1	0	1	0
Fbxl2	FBXL2	FBXL2	FBXL2	0	0	1
Myd88	MYD88	MYD88	MYD88	0	0	1
Gorasp1	GORASP1	GORASP1	GORASP1	0	1	0
Hhatl	HHATL	HHATL	HHATL	0	0	1
Pccb	PCCB	PCCB	PCCB	1	0	0
Cck	CCK	CCK	CCK	0	0	1
Abhd5	ABHD5	ABHD5	ABHD5	0	0	1
Rab6b	RAB6B	RAB6B	RAB6B	0	0	1
1110059G10Rik	KIAA1143	KIAA1143	KIAA1143	0	0	1
Srprb	SRPRB	SRPRB	SRPRB	1	0	0
Trf	TF	TF	TF	1	0	0
Mrpl3	MRPL3	MRPL3	MRPL3	1	0	0
Aste1	ASTE1	ASTE1	ASTE1	0	0	1
Cish	CISH	CISH	CISH	0	0	1
Mon1a	MON1A	MON1A	MON1A	0	0	1
Apeh	APEH	APEH	APEH	0	0	1
Mst1	MST1	MST1	MST1	0	0	1
Amigo3	AMIGO3	AMIGO3	AMIGO3	0	0	1
Slc25a20	SLC25A20	SLC25A20	SLC25A20	1	0	0
Thsd7a	THSD7A	THSD7A	THSD7A	0	0	1
Gpr19	GPR19	GPR19	GPR19	0	0	1
Pon2	PON2	PON2	PON2	0	0	1
Kank1	KANK1	KANK1	KANK1	0	0	1
Syde1	SYDE1	SYDE1	SYDE1	0	0	1
Tpcn1	TPCN1	TPCN1	TPCN1	0	0	1
Heyl	HEYL	HEYL	HEYL	0	0	1
Slc8b1	SLC8B1	SLC8B1	SLC8B1	0	0	1
Pdxk	PDXK	PDXK	PDXK	1	0	0
Lama1	LAMA1	LAMA1	LAMA1	1	0	0
Arap1	ARAP1	ARAP1	ARAP1	0	0	1
Alpk2	ALPK2	ALPK2	ALPK2	0	0	1
Zswim6	ZSWIM6	ZSWIM6	ZSWIM6	0	1	0
Rnft2	RNFT2	RNFT2	RNFT2	0	0	1
Rspo4	RSPO4	RSPO4	RSPO4	0	0	1
Fbxw8	FBXW8	FBXW8	FBXW8	0	1	0
Psmf1	PSMF1	PSMF1	PSMF1	1	0	0
Rims3	RIMS3	RIMS3	RIMS3	0	0	1
Cspg4	CSPG4	CSPG4	CSPG4	0	0	1
Fshr	FSHR	FSHR	FSHR	0	0	1
Fam207a	SLX9	SLX9	SLX9	0	0	1
Chpf	CHPF	CHPF	CHPF	0	0	1
Asic4	ASIC4	ASIC4	ASIC4	0	0	1
Ogfod1	OGFOD1	OGFOD1	OGFOD1	0	0	1
Polr2f	POLR2F	POLR2F	POLR2F	1	0	0
1700088E04Rik	C5H22orf23	C22orf23	C22orf23	0	0	1
Calhm2	CALHM2	CALHM2	CALHM2	0	0	1
Dhrs7c	DHRS7C	DHRS7C	DHRS7C	0	0	1
Npat	NPAT	NPAT	NPAT	1	0	0
Lmo7	LMO7	LMO7	LMO7	0	0	1
Gas7	GAS7	GAS7	GAS7	0	0	1
Entpd6	ENTPD6	ENTPD6	ENTPD6	0	0	1
Tbc1d4	TBC1D4	TBC1D4	TBC1D4	0	0	1
Apmap	APMAP	APMAP	APMAP	0	0	1
Lss	LSS	LSS	LSS	1	0	0
Gga1	GGA1	GGA1	GGA1	0	0	1
Phldb2	PHLDB2	PHLDB2	PHLDB2	0	0	1
Podxl2	PODXL2	PODXL2	PODXL2	0	0	1
Cnppd1	CNPPD1	CNPPD1	CNPPD1	0	0	1
Dis3	DIS3	DIS3	DIS3	1	0	0
Ttc28	TTC28	TTC28	TTC28	0	0	1
Scaf11	SCAF11	SCAF11	SCAF11	0	0	1
Trim45	TRIM45	TRIM45	TRIM45	1	0	0
Arid2	ARID2	ARID2	ARID2	1	0	0
Hsf4	HSF4	HSF4	HSF4	0	0	1
Stk36	STK36	STK36	STK36	0	0	1
Ptprm	PTPRM	PTPRM	PTPRM	0	0	1
Rpgrip1l	RPGRIP1L	RPGRIP1L	RPGRIP1L	1	0	0
Wdr3	WDR3	WDR3	WDR3	0	1	0
Kctd17	KCTD17	KCTD17	KCTD17	0	0	1
Dpyd	DPYD	DPYD	DPYD	0	0	1
Pus7l	PUS7L	PUS7L	PUS7L	0	0	1
Usp37	USP37	USP37	USP37	1	0	0
Frrs1	FRRS1	FRRS1	FRRS1	0	1	0
Arhgap44	ARHGAP44	ARHGAP44	ARHGAP44	0	0	1
Agl	AGL	AGL	AGL	0	1	0
Ctdspl2	CTDSPL2	CTDSPL2	CTDSPL2	0	1	0
Eri3	ERI3	ERI3	ERI3	0	0	1
Upb1	UPB1	UPB1	UPB1	0	0	1
Adamts15	ADAMTS15	ADAMTS15	ADAMTS15	0	0	1
Fan1	FAN1	FAN1	FAN1	0	0	1
Crygs	CRYGS	CRYGS	CRYGS	0	0	1
Cdc14a	CDC14A	CDC14A	CDC14A	0	1	0
Acsm1	ACSM1	ACSM1	ACSM1	0	0	1
Arhgef5	ARHGEF5	ARHGEF5	ARHGEF5	0	0	1
Adgrb3	ADGRB3	ADGRB3	ADGRB3	0	1	0
Myo5c	MYO5C	MYO5C	MYO5C	0	0	1
Map3k13	MAP3K13	MAP3K13	MAP3K13	0	0	1
Smyd5	SMYD5	SMYD5	SMYD5	0	0	1
Sfxn5	SFXN5	SFXN5	SFXN5	0	0	1
Fkbpl	FKBPL	FKBPL	FKBPL	0	1	0
St18	ST18	ST18	ST18	0	0	1
Tmem131l	TMEM131L	TMEM131L	TMEM131L	0	1	0
Rpap2	RPAP2	RPAP2	RPAP2	1	0	0
B3galt2	B3GALT2	B3GALT2	B3GALT2	0	1	0
Klf9	KLF9	KLF9	KLF9	0	0	1
Mapkbp1	MAPKBP1	MAPKBP1	MAPKBP1	0	0	1
Gde1	GDE1	GDE1	GDE1	0	1	0
Aspm	ASPM	ASPM	ASPM	0	0	1
Tnks1bp1	TNKS1BP1	TNKS1BP1	TNKS1BP1	0	0	1
Jcad	JCAD	JCAD	JCAD	0	0	1
Slc16a2	SLC16A2	SLC16A2	SLC16A2	0	0	1
[truncated: 1,358 more rows]
