# Supplementary material for: A longitudinal single-nucleus transcriptomic atlas of the bovine placenta reveals dynamic cellular hierarchies and regulatory networks during gestation
Source: Research Square preprint supplement (doi:10.21203/rs.3.rs-8046408/v1), 2025-11-26
Supplement: Supplementary file 6 [file b26f6773dc36f3d1d21e3f9b.xlsx]

## Sheet: gene cluster
gene	cluster	membership
AAAS	C1	0.483064
AAMP	C1	0.948408
AAR2	C1	0.999882
AARS1	C1	0.980584
AARS2	C1	0.999797
AATF	C1	0.944576
ABCB6	C1	0.999712
ABCB7	C1	0.704942
ABCB8	C1	0.999992
ABHD12	C1	0.950007
ABHD8	C1	0.992951
ABRAXAS1	C1	0.985355
ABT1	C1	0.999667
ACAD8	C1	0.969726
ACAD9	C1	0.979158
ACADS	C1	0.997291
ACBD5	C1	0.792115
ACHE	C1	0.971974
ACIN1	C1	0.948039
ACO1	C1	0.999606
ACP2	C1	0.921647
ACP6	C1	0.985631
ACSF3	C1	0.98002
ACSS2	C1	0.491065
ACTC1	C1	0.804743
ACTG1	C1	0.71546
ACTL6A	C1	0.967596
ACTR1A	C1	0.999998
ACTR1B	C1	0.999792
ACTR8	C1	0.999977
ADAD2	C1	0.933078
ADAM23	C1	0.736519
ADAMTS12	C1	0.607955
ADAMTS19	C1	0.39678
ADAT1	C1	0.847251
ADAT2	C1	0.99999
ADI1	C1	0.983843
ADIPOR1	C1	0.611849
ADPRS	C1	0.97215
ADSL	C1	0.999916
ADTRP	C1	0.54326
AEN	C1	0.999621
AFG3L2	C1	0.999997
AGL	C1	0.972926
AGRP	C1	0.939323
AHSA1	C1	0.999975
AIDA	C1	0.818505
AIFM3	C1	0.924881
AIMP1	C1	0.946388
AIP	C1	0.999624
AKAP7	C1	0.40813
AKIP1	C1	0.999999
AKR1A1	C1	0.907488
ALAD	C1	0.94878
ALCAM	C1	0.881145
ALDH18A1	C1	0.996521
ALDH3A2	C1	0.94332
ALDOC	C1	0.711307
ALG12	C1	0.989385
ALG3	C1	0.999899
ALG5	C1	0.998718
ALG8	C1	0.99964
ALKBH1	C1	0.999074
ALKBH4	C1	0.999999
ALKBH5	C1	1
ALKBH7	C1	0.987478
ALOX12	C1	0.63912
AMIGO2	C1	0.985565
ANAPC16	C1	0.924877
ANAPC2	C1	0.986724
ANAPC4	C1	0.82668
ANAPC5	C1	0.86597
ANKLE2	C1	0.964948
ANKRD13A	C1	0.999978
ANKRD13D	C1	0.999988
ANKRD39	C1	1
ANKRD52	C1	0.965832
ANKRD54	C1	0.996405
ANKS3	C1	0.984367
ANKZF1	C1	0.999783
ANP32B	C1	0.999622
ANP32E	C1	0.978981
ANXA1	C1	0.863186
AP1B1	C1	0.999832
AP1M1	C1	0.980099
AP1M2	C1	0.999994
AP1S1	C1	0.987894
AP1S2	C1	0.931295
AP2A1	C1	0.975706
AP2A2	C1	0.56919
AP3S2	C1	0.999995
AP5S1	C1	0.84193
APBA3	C1	0.967442
APBB1IP	C1	0.683269
APBB3	C1	0.953375
APEH	C1	0.999739
APEX1	C1	0.999592
APEX2	C1	0.610942
API5	C1	0.995062
APMAP	C1	0.567665
APOM	C1	0.999602
APOO	C1	0.861067
APRT	C1	0.841558
APTX	C1	0.989386
ARF6	C1	0.999826
ARFGAP1	C1	0.768197
ARFGAP2	C1	0.998859
ARFRP1	C1	0.938383
ARG1	C1	0.448677
ARHGAP1	C1	0.786616
ARHGAP42	C1	0.798541
ARHGDIB	C1	0.760645
ARHGEF39	C1	0.95678
ARID3A	C1	0.997363
ARID5A	C1	0.997371
ARL1	C1	0.913598
ARL14	C1	0.978532
ARL6IP4	C1	0.995243
ARL8A	C1	0.99734
ARMC1	C1	0.999995
ARMC5	C1	0.989748
ARMC6	C1	0.999979
ARMCX5	C1	0.979529
ARRDC2	C1	0.853529
ARSA	C1	0.959629
ARVCF	C1	0.999998
ASAH1	C1	0.8717
ASB6	C1	0.986019
ASF1B	C1	0.999998
ASGR1	C1	0.66784
ATG101	C1	0.999394
ATG12	C1	0.99842
ATG4D	C1	0.999771
ATMIN	C1	0.879001
ATP13A1	C1	0.995425
ATP23	C1	0.99988
ATP2A2	C1	0.999697
ATP2B1	C1	0.834393
ATP5F1A	C1	0.957956
ATP5F1B	C1	0.997206
ATP5F1C	C1	0.685757
ATP5PF	C1	0.998924
ATP6AP1	C1	0.999588
ATP6V1FNB	C1	0.665516
ATP6V1G1	C1	0.808451
ATRIP	C1	0.999892
ATXN1L	C1	0.990799
ATXN2L	C1	0.692425
ATXN7L2	C1	0.936161
ATXN7L3	C1	0.999992
AUNIP	C1	0.969034
AURKA	C1	0.998695
AURKB	C1	0.999859
B4GALT2	C1	0.897762
B4GALT4	C1	0.683803
B4GALT7	C1	0.99995
BABAM1	C1	0.996257
BAG6	C1	0.981996
BAIAP3	C1	0.983941
BAK1	C1	0.992659
BAMBI	C1	0.970671
BANF1	C1	0.927033
BAP1	C1	0.999993
BATF	C1	0.831062
BBC3	C1	0.978588
BCAP31	C1	0.99999
BCAS2	C1	0.396165
BCKDK	C1	0.999999
BCL3	C1	0.999018
BCL7B	C1	0.999997
BCL7C	C1	0.999987
BDP1	C1	0.960255
BID	C1	0.954282
BMP4	C1	0.381139
BMP7	C1	0.740756
BNIP3	C1	0.999927
BOD1L1	C1	0.743885
BOLA1	C1	0.998197
BOLA3	C1	0.999028
BRAT1	C1	0.937563
BRF1	C1	0.415203
BRI3BP	C1	0.999962
BRIX1	C1	0.999879
BSCL2	C1	0.793901
BTBD6	C1	0.999915
BTD	C1	0.999845
BUB1	C1	0.99899
BUB3	C1	0.999627
BUD23	C1	0.914435
BUD31	C1	0.823844
BYSL	C1	0.81757
BZW1	C1	0.993043
C5H12orf29	C1	0.999999
C17H12orf43	C1	0.992847
C10H15orf61	C1	0.999998
C19H17orf49	C1	0.999951
C24H18orf21	C1	0.957389
C16H1orf116	C1	0.94249
C28H1orf131	C1	0.999931
C16H1orf174	C1	0.998322
C7H1orf35	C1	0.999392
C3H1orf50	C1	0.999988
C3H1orf52	C1	0.932392
C16H1orf53	C1	0.997436
C16H1orf74	C1	0.994036
C2CD2	C1	0.989338
C11H2orf49	C1	0.998649
C2H2orf69	C1	0.697758
C1H3orf38	C1	0.999997
C17H4orf33	C1	0.979035
C6H4orf48	C1	0.974813
C9H6orf120	C1	0.987165
C23H6orf136	C1	1
C9H6orf58	C1	0.950114
C4H7orf25	C1	0.999916
C25H7orf50	C1	0.980372
C14H8orf33	C1	0.959511
C14H8orf82	C1	0.999999
CA9	C1	0.999531
CAAP1	C1	0.998431
CABP2	C1	0.999442
CACNA1I	C1	0.595558
CACNA1S	C1	0.690845
CACNA2D4	C1	0.578681
CACYBP	C1	0.999888
CALCOCO2	C1	0.996724
CALU	C1	0.723974
CAND1	C1	0.99925
CAPN10	C1	0.962359
CARD19	C1	0.943515
CARMIL1	C1	0.437221
CARNMT1	C1	0.998008
CARS1	C1	0.999209
CASC3	C1	0.687253
CASKIN2	C1	0.57618
CASP2	C1	0.838032
CASP3	C1	0.993617
CASP8AP2	C1	0.514395
CAST	C1	0.949574
CBLC	C1	0.93317
CBX2	C1	0.986947
CBX5	C1	0.999824
CC2D1A	C1	0.970777
CC2D1B	C1	0.83232
CCDC103	C1	0.666686
CCDC107	C1	0.961001
CCDC117	C1	0.528939
CCDC12	C1	0.801623
CCDC127	C1	0.999981
CCDC134	C1	0.988783
CCDC137	C1	0.997725
CCDC148	C1	0.854722
CCDC174	C1	0.998432
CCDC22	C1	0.999809
CCDC28B	C1	0.988545
CCDC32	C1	0.604326
CCDC34	C1	0.853792
CCDC43	C1	0.999908
CCDC47	C1	0.999954
CCDC51	C1	0.999995
CCDC59	C1	0.990353
CCDC71	C1	0.999958
CCDC86	C1	0.59324
CCDC9	C1	0.997123
CCDC90B	C1	0.999304
CCDC97	C1	0.999998
CCM2	C1	0.813994
CCN2	C1	0.629765
CCNA2	C1	0.999971
CCND3	C1	0.522146
CCNE1	C1	0.629713
CCNE2	C1	0.999768
CCNK	C1	0.999847
CCRL2	C1	0.828401
CCSAP	C1	0.986247
CCT2	C1	0.998603
CCT3	C1	0.999973
CCT4	C1	0.999943
CCT5	C1	0.999597
CCT6A	C1	0.999992
CCT7	C1	0.999353
CD14	C1	0.986166
CD244	C1	0.629957
CD2BP2	C1	0.997971
CD3D	C1	0.999769
CD48	C1	0.906218
CD9	C1	0.999999
CDC123	C1	0.999997
CDC16	C1	0.999851
CDC20	C1	0.99954
CDC23	C1	0.92309
CDC25A	C1	0.950266
CDC45	C1	0.999987
CDC6	C1	0.999775
CDCA3	C1	0.992463
CDCA5	C1	0.999748
CDCA8	C1	0.999999
CDH24	C1	0.553522
CDHR5	C1	0.591661
CDK1	C1	0.994138
CDK10	C1	0.667646
CDK20	C1	0.999924
CDK4	C1	0.999698
CDK5	C1	0.999967
CDK5RAP3	C1	1
CDK9	C1	0.999987
CDPF1	C1	0.993145
CDT1	C1	0.918133
CEBPZ	C1	0.999999
CELSR3	C1	0.877338
CEMIP2	C1	0.981451
CENPJ	C1	0.933626
CENPK	C1	0.949729
CENPO	C1	0.984247
CENPQ	C1	0.862706
CENPT	C1	0.998976
CENPU	C1	0.965756
CENPW	C1	0.98459
CEP131	C1	0.999026
CEP19	C1	0.999985
CEP68	C1	0.974621
CEP78	C1	0.996164
CEPT1	C1	0.983255
CERK	C1	0.793368
CERS2	C1	0.7389
CERS5	C1	0.983539
CFAP20	C1	0.984332
CFAP97	C1	0.999852
CFDP1	C1	0.674068
CHAC2	C1	0.986311
CHAMP1	C1	0.553434
CHCHD1	C1	0.999959
CHD1L	C1	0.94587
CHD3	C1	0.994239
CHD4	C1	0.999863
CHD7	C1	0.928554
CHEK1	C1	0.776433
CHFR	C1	0.999992
CHID1	C1	0.911342
CHKB	C1	0.99542
CHMP1A	C1	0.999999
CHMP2A	C1	0.99569
CHMP3	C1	0.868933
CHMP4C	C1	0.994527
CHMP5	C1	0.689456
CHMP7	C1	0.999987
CHORDC1	C1	0.999993
CHPF2	C1	0.541515
CHRAC1	C1	0.999979
CHRNE	C1	0.997713
CHTF18	C1	0.989141
CIAO1	C1	1
CIAO2A	C1	0.726999
CIAO2B	C1	0.999987
CIAO3	C1	0.999818
CIB1	C1	0.595895
CIP2A	C1	0.891273
CLCC1	C1	0.998033
CLDN11	C1	0.31169
CLEC11A	C1	0.906366
CLN3	C1	0.847077
CLN6	C1	0.996287
CLP1	C1	0.999945
CLPB	C1	0.532711
CLPP	C1	0.630672
CLPTM1	C1	0.999999
CLPTM1L	C1	0.999794
CLRN3	C1	0.727536
CLSPN	C1	0.99101
CLUH	C1	0.999354
CMSS1	C1	0.968185
CMTM6	C1	0.974947
CNBP	C1	0.990756
CNIH1	C1	0.999948
CNIH2	C1	0.962341
CNIH4	C1	0.999501
CNNM4	C1	0.733816
CNOT10	C1	0.935402
CNOT9	C1	0.847788
CNPPD1	C1	0.866154
CNPY4	C1	0.99961
COA3	C1	0.807523
COA5	C1	0.999957
COA8	C1	0.99794
COASY	C1	0.99996
COG2	C1	0.999909
COG4	C1	0.940597
COG8	C1	0.999858
COIL	C1	0.651929
COL6A6	C1	0.334324
COMMD3	C1	0.656369
COMMD4	C1	0.731726
COMMD5	C1	0.999999
COPE	C1	0.990634
COPS3	C1	0.999974
COPS4	C1	0.999408
COPS5	C1	0.999925
COPS7A	C1	0.999995
COPS7B	C1	0.754327
COPZ1	C1	0.983843
COQ2	C1	0.917032
COQ3	C1	0.528823
COQ4	C1	0.970018
COQ5	C1	0.842638
COQ6	C1	0.923243
COQ7	C1	0.982573
CORO1A	C1	0.936426
CORO1B	C1	0.99946
COX1	C1	0.998639
COX11	C1	0.739384
COX20	C1	0.719128
COX4I1	C1	0.994532
CPA4	C1	0.978652
CPOX	C1	0.995154
CPSF2	C1	0.964342
CPSF3	C1	1
CRB3	C1	0.80714
CRBN	C1	0.994286
CREB3	C1	0.727797
CRELD1	C1	0.999437
CRELD2	C1	0.666365
CRLF3	C1	0.585153
CRLS1	C1	0.984997
CRNKL1	C1	0.999693
CRY1	C1	0.980217
CSNK2B	C1	0.995047
CSRNP2	C1	0.689092
CSRP1	C1	0.689079
CST6	C1	0.534519
CSTF1	C1	0.987499
CSTF2	C1	0.999442
CTBP1	C1	0.746251
CTBP2	C1	0.656712
CTDNEP1	C1	0.999947
CTDP1	C1	0.995058
CTDSP1	C1	0.643192
CTPS1	C1	0.971629
CTSB	C1	0.793131
CTSZ	C1	0.443592
CUEDC2	C1	0.999997
CUTA	C1	0.999903
CWC15	C1	0.985807
CWC25	C1	0.697744
CXXC1	C1	0.98256
CXXC5	C1	0.99972
CYB561D1	C1	0.998912
CYB561D2	C1	0.999719
CYB5A	C1	0.999917
CYB5R4	C1	0.792824
CYBC1	C1	0.999999
CYHR1	C1	0.999109
CYP1B1	C1	0.434447
DAD1	C1	0.998739
DAGLA	C1	0.934127
DALRD3	C1	0.999999
DAP3	C1	0.997378
DAPP1	C1	0.637954
DARS2	C1	0.989769
DAXX	C1	0.570682
DAZAP1	C1	0.952699
DBNL	C1	0.99997
DBR1	C1	0.997792
DCAF17	C1	0.884173
DCAKD	C1	0.974946
DCLRE1A	C1	0.859138
DCLRE1B	C1	0.995496
DCLRE1C	C1	0.448611
DCPS	C1	0.869966
DCTN2	C1	0.99966
DCTN3	C1	0.999945
DCUN1D5	C1	0.999911
DDHD1	C1	0.995372
DDIT4	C1	0.51817
DDN	C1	0.540467
DDOST	C1	0.999844
DDR1	C1	0.995888
DDRGK1	C1	0.999307
DDX1	C1	0.999997
DDX10	C1	0.445298
DDX23	C1	0.999999
DDX24	C1	0.999705
DDX25	C1	0.970985
DDX27	C1	0.968764
DDX28	C1	0.654604
DDX47	C1	0.999977
DDX49	C1	0.996027
DDX51	C1	0.998327
DDX52	C1	0.648434
DDX55	C1	0.994668
DDX56	C1	0.98853
DEAF1	C1	0.996816
DECR1	C1	0.847048
DEF8	C1	0.991001
DEK	C1	0.999484
DELE1	C1	0.98917
DENND10	C1	0.739452
DERA	C1	0.988942
DERL3	C1	0.972306
CHTF8	C1	0.994928
DGAT1	C1	0.999276
DGKZ	C1	0.946903
DHCR7	C1	0.997892
DHODH	C1	0.833206
DHRS1	C1	0.998981
DHRS3	C1	0.850055
DHRS7B	C1	0.875827
DHTKD1	C1	0.827471
DHX16	C1	0.998631
DHX29	C1	0.979265
DHX30	C1	0.999585
DHX38	C1	0.999776
DIMT1	C1	0.999228
DIS3	C1	0.894161
DLD	C1	0.850549
DLX4	C1	0.98418
DLX5	C1	0.953915
DLX6	C1	0.929992
DMAC2L	C1	0.65768
DNAH8	C1	0.980696
DNAJB2	C1	0.996975
DNAJC21	C1	0.999959
DNAJC28	C1	0.9767
DNAJC4	C1	0.544565
DNAJC7	C1	0.999985
DNASE1L2	C1	0.986336
DNASE2	C1	0.994158
DNM2	C1	0.640349
DNMT1	C1	0.999853
DOK1	C1	0.98126
DOK2	C1	0.708229
DOK7	C1	0.869696
DOLPP1	C1	0.999924
DPAGT1	C1	0.999908
DPCD	C1	0.999967
DPH1	C1	0.669994
DPH2	C1	0.996179
DPH3	C1	0.997865
DPH5	C1	0.982282
DPH7	C1	0.999999
DPP3	C1	0.999991
DRAP1	C1	0.999926
DRG2	C1	0.998382
DSCC1	C1	0.999998
DTL	C1	0.995502
DTWD1	C1	0.625054
DTWD2	C1	0.675889
DTX2	C1	0.661557
DTYMK	C1	0.773045
DUOXA2	C1	0.998723
DUS1L	C1	0.999987
DUS2	C1	0.999527
DUSP18	C1	0.95956
DUSP7	C1	0.990366
DUT	C1	0.999983
DXO	C1	0.999999
DYNC1I2	C1	0.947303
DYNLL2	C1	0.999257
E2F1	C1	0.999524
E2F7	C1	0.982989
EBNA1BP2	C1	0.999927
EBP	C1	0.547389
ECD	C1	0.999829
ECHS1	C1	0.99927
EDC4	C1	0.999994
EDEM2	C1	0.55084
EDF1	C1	0.99996
EEF1AKMT3	C1	0.987722
EEF1E1	C1	0.953629
EEFSEC	C1	0.891628
EEPD1	C1	0.808603
EFNB1	C1	0.991046
EFTUD2	C1	0.999974
EGR2	C1	0.995539
EHD1	C1	0.999882
EHMT2	C1	0.732698
EIF1AD	C1	0.99938
EIF1B	C1	0.981238
EIF2AK1	C1	0.796517
EIF2AK2	C1	0.765463
EIF2AK3	C1	0.985346
EIF2B1	C1	0.999971
EIF2B2	C1	0.944737
EIF2B5	C1	0.999999
EIF2D	C1	0.996945
EIF2S1	C1	0.999592
EIF3A	C1	0.943154
EIF3B	C1	1
EIF3D	C1	0.999925
EIF3E	C1	0.999902
EIF3F	C1	0.999997
EIF3G	C1	0.876528
EIF3H	C1	0.999994
EIF3K	C1	0.999993
EIF3L	C1	0.999993
EIF4E	C1	0.994757
EIF4G1	C1	0.999997
EIF5	C1	0.970778
EIPR1	C1	0.827949
ELAC1	C1	0.998206
ELAC2	C1	0.976997
ELAVL1	C1	1
ELK3	C1	0.783126
ELOA	C1	0.974707
ELOC	C1	0.93733
ELOF1	C1	0.996306
ELP2	C1	0.606136
ELP3	C1	0.550683
ELP5	C1	0.996098
EMC10	C1	0.999997
EMC2	C1	0.87858
EMC7	C1	0.999889
EMC8	C1	0.996646
EMC9	C1	0.956385
EMD	C1	0.999995
EME2	C1	0.994866
EMILIN2	C1	0.642543
EML2	C1	0.697398
ENTPD2	C1	0.871683
ENTPD6	C1	0.493448
ENTPD7	C1	0.805162
ENTPD8	C1	0.985224
ENTR1	C1	0.999962
ENY2	C1	0.99893
EOGT	C1	0.996065
EPB41L2	C1	0.952529
EPHA1	C1	0.600281
EPHX3	C1	0.520208
EPN2	C1	0.99961
EPRS1	C1	0.997533
ERAL1	C1	0.999095
ERCC1	C1	0.963492
ERCC2	C1	0.997763
ERCC3	C1	0.976764
ERCC4	C1	0.64223
ERCC6L	C1	0.658834
ERCC8	C1	0.999246
ERG28	C1	0.942527
ERGIC1	C1	0.732861
ERGIC3	C1	0.674988
ERI3	C1	0.42322
ERICH1	C1	0.999945
ERLEC1	C1	0.99831
ERLIN1	C1	0.974906
ERO1A	C1	0.875144
ERO1B	C1	0.960202
ESD	C1	0.999805
ESPL1	C1	0.734204
ESRRA	C1	0.998566
ETV2	C1	0.928791
EXO1	C1	0.995896
EXOC7	C1	0.990837
EXOC8	C1	0.971068
EXOSC1	C1	0.793895
EXOSC10	C1	0.998907
EXOSC2	C1	0.999458
EXOSC3	C1	0.999988
EXOSC5	C1	0.995756
EXOSC7	C1	0.999346
EXOSC8	C1	0.976343
EXOSC9	C1	0.999959
EXTL2	C1	0.999986
FAAP24	C1	0.99963
FADD	C1	0.999788
FAHD1	C1	0.527822
FAHD2A	C1	0.998208
FAM110A	C1	0.684663
FAM110C	C1	0.909094
FAM114A2	C1	0.999998
FAM161A	C1	0.999999
FAM161B	C1	0.87391
FAM163A	C1	0.965265
FAM174A	C1	0.990681
FAM174C	C1	0.91381
FAM199X	C1	0.982739
FAM204A	C1	0.998146
FAM210A	C1	0.99997
FAM234B	C1	0.764023
FAM3A	C1	0.999942
FAM53B	C1	0.99964
FAM83D	C1	0.958303
FAM89A	C1	0.891876
FAM8A1	C1	0.98864
FAM98A	C1	0.999999
FAM98B	C1	0.999498
FAM98C	C1	0.999915
FAN1	C1	0.785535
FANCE	C1	0.999949
FASTK	C1	0.999987
FASTKD2	C1	0.998863
FASTKD3	C1	0.989884
FASTKD5	C1	0.999946
FBF1	C1	0.953032
FBLN2	C1	0.999296
FBRS	C1	0.939871
FBXL14	C1	0.999757
FBXL15	C1	0.974577
FBXL16	C1	0.945509
FBXL22	C1	0.917497
FBXL6	C1	0.999146
FBXO45	C1	0.943793
FBXO46	C1	0.330877
FBXO48	C1	0.991067
FBXO5	C1	0.919928
FBXW2	C1	0.996247
FCSK	C1	0.842922
FEN1	C1	0.999973
FGD6	C1	0.753469
FH	C1	0.999999
FHIP2A	C1	0.984551
FHOD1	C1	0.9475
FIBP	C1	0.983851
FIGNL1	C1	0.971531
FKBP4	C1	0.958628
FKBPL	C1	0.999995
FLAD1	C1	0.999793
FLVCR2	C1	0.581374
FLYWCH2	C1	0.997088
FMC1	C1	0.998608
FNDC3A	C1	0.801033
FNDC4	C1	0.991268
FNDC5	C1	0.589293
FOLR2	C1	0.951711
FOS	C1	0.999069
FOSB	C1	0.952887
FOXRED1	C1	0.998586
FPGS	C1	0.984613
FRA10AC1	C1	0.979083
FTSJ3	C1	0.999947
FUCA1	C1	0.999997
FUOM	C1	0.903749
FZD2	C1	0.305002
G3BP1	C1	0.997999
GABARAPL2	C1	0.981932
GADD45B	C1	0.998912
GAK	C1	0.998127
GALE	C1	0.930395
GALK2	C1	0.912869
GALNS	C1	0.999317
GALNT12	C1	0.994074
GAMT	C1	0.992676
GANAB	C1	0.996383
GART	C1	1
GAS2L1	C1	0.979793
GATD1	C1	0.999994
GATM	C1	0.462046
GCDH	C1	0.988026
GCH1	C1	0.99998
GCHFR	C1	0.780576
GDE1	C1	0.99092
GEMIN4	C1	0.945309
GEMIN5	C1	0.997721
GEMIN7	C1	0.978142
GFI1	C1	0.929105
GFM1	C1	0.841384
GFM2	C1	0.640286
GFRA3	C1	0.75989
GFUS	C1	0.999987
GGA2	C1	0.980763
GGCX	C1	0.583985
GGH	C1	0.833486
GHR	C1	0.929413
GID8	C1	0.994552
GINS4	C1	0.998858
GIPC1	C1	0.990293
GJB3	C1	0.434836
GLOD4	C1	0.999202
GLRX3	C1	0.999997
GLRX5	C1	0.998551
GMFB	C1	0.71098
GMNN	C1	0.999586
GMPPA	C1	0.981864
GMPR2	C1	0.952464
GMPS	C1	0.986928
GNAI2	C1	0.999997
GNAS	C1	0.998382
GNB2	C1	0.999177
GNL2	C1	0.999719
GNL3	C1	0.999994
GNPDA2	C1	0.999946
GORASP1	C1	0.966918
GOT1	C1	0.908118
GPANK1	C1	0.99995
GPAT4	C1	0.605554
GPKOW	C1	1
GPN1	C1	0.999064
GPN2	C1	0.999692
GPN3	C1	0.999869
GPR108	C1	0.995093
GPR137	C1	0.997105
GPR137C	C1	0.612894
GPRASP2	C1	0.77491
GPS1	C1	0.999461
GPSM1	C1	0.619017
GPX4	C1	0.999821
GRINA	C1	0.67254
GRIPAP1	C1	0.980861
GRK2	C1	0.999996
GRPEL1	C1	0.997802
GRTP1	C1	0.997237
GRWD1	C1	0.999368
GSDMA	C1	0.457316
GSDMD	C1	0.613296
GSK3A	C1	0.998307
GSTZ1	C1	0.998862
GTF2F1	C1	0.975415
GTF2H4	C1	1
GTF3A	C1	0.995295
GTF3C1	C1	0.883628
GTF3C4	C1	0.952687
GTF3C5	C1	0.999978
GTPBP10	C1	0.981948
GTPBP4	C1	0.999992
GTSE1	C1	0.998895
GUCD1	C1	0.909061
GXYLT1	C1	0.970545
GZF1	C1	0.998833
GZMA	C1	0.834358
H1-2	C1	0.996725
H1-4	C1	0.99985
H2AC19	C1	0.873744
H2AJ	C1	0.888691
H2BC18	C1	0.981765
HADHA	C1	0.99679
HADHB	C1	0.999804
HAMP	C1	0.68427
HARS1	C1	0.993657
HARS2	C1	0.538746
HASPIN	C1	0.999915
HAUS1	C1	0.70858
HAUS2	C1	0.940846
HAUS8	C1	0.999988
HAX1	C1	0.999998
HCFC1	C1	0.901665
HCLS1	C1	0.436071
HCN3	C1	0.541184
HDAC2	C1	0.918812
HDAC3	C1	1
HDDC2	C1	0.99995
HDDC3	C1	0.892871
HDHD3	C1	0.999969
HDHD5	C1	0.999733
HEATR1	C1	0.999523
HECTD3	C1	0.999927
HELB	C1	0.681423
HES2	C1	0.977002
HEXA	C1	0.998529
HEY1	C1	0.778274
HIF1AN	C1	0.941142
HIKESHI	C1	0.999887
HINFP	C1	0.999978
HINT3	C1	0.779897
HIRA	C1	0.991508
HJURP	C1	0.486384
HKDC1	C1	0.425987
HLTF	C1	0.985429
HM13	C1	0.949143
HMBS	C1	0.975654
HMCES	C1	0.999997
HMGCL	C1	0.999963
HMMR	C1	0.947775
HNRNPD	C1	0.838646
HNRNPH2	C1	0.999819
HOOK1	C1	0.999099
HOXA11	C1	0.989862
HOXB5	C1	0.454285
HOXB7	C1	0.50153
HPDL	C1	0.999673
HPS1	C1	0.975248
HSD17B10	C1	0.999999
HSD17B8	C1	0.994011
HSDL1	C1	0.995441
HSF1	C1	1
HSF2	C1	0.570258
HSPA14	C1	0.995834
HSPA9	C1	0.999999
HSPH1	C1	0.896025
HTRA2	C1	0.999808
HUS1	C1	0.999997
HVCN1	C1	0.973523
HYAL1	C1	0.729307
HYAL2	C1	0.999999
HYAL3	C1	0.994693
HYAL4	C1	0.494116
HYLS1	C1	0.991481
HYOU1	C1	0.773955
IARS1	C1	0.607825
IBA57	C1	0.682557
IBTK	C1	0.995901
ID2	C1	0.980111
ID4	C1	0.575765
IDE	C1	0.993425
IDH1	C1	0.763645
IFT20	C1	0.885461
IFT43	C1	0.751611
IGFALS	C1	0.807086
IGSF8	C1	0.412275
IK	C1	0.959177
IKBIP	C1	0.864217
IKBKG	C1	0.998884
IL13RA1	C1	0.999868
IL1RN	C1	0.963728
IL4R	C1	0.950069
ILF3	C1	0.999985
IMMT	C1	0.999933
IMPA2	C1	0.923257
IMPDH2	C1	0.893872
INCENP	C1	0.999769
ING1	C1	0.998022
ING2	C1	0.999323
INKA1	C1	0.81667
INO80C	C1	0.940357
INO80E	C1	0.88868
INPP5J	C1	0.751446
INPPL1	C1	0.950417
INTS10	C1	0.999862
INTS13	C1	0.998627
INTS3	C1	0.999121
INTS5	C1	0.999671
IPO5	C1	0.991041
IPO8	C1	0.980014
IQCC	C1	0.646323
IRAK1	C1	0.963807
IRAK4	C1	0.932171
IRF3	C1	0.946837
IRF7	C1	0.99994
IRF9	C1	0.662316
ISCA2	C1	0.993286
ISG20L2	C1	0.999987
ISYNA1	C1	0.954549
ITGAE	C1	0.900721
ITGB1BP1	C1	0.999635
ITPA	C1	0.999765
IVD	C1	0.724245
JAGN1	C1	0.999686
JCAD	C1	0.613741
JMJD4	C1	0.999919
JMJD6	C1	0.999992
JMJD8	C1	0.998279
JMY	C1	0.905995
JOSD2	C1	0.999868
JPT2	C1	0.548958
KARS1	C1	0.999883
KAT14	C1	0.971478
KAT2A	C1	0.999642
KATNB1	C1	0.999979
KBTBD4	C1	0.904944
KBTBD6	C1	0.969356
KBTBD8	C1	0.862825
KCNJ14	C1	0.572955
KCTD21	C1	0.475299
KDELR1	C1	0.999711
KDF1	C1	0.999179
KDM4B	C1	0.421639
KDM8	C1	0.99833
KDSR	C1	0.607366
KEAP1	C1	0.999978
KIAA0408	C1	0.858889
KIAA1143	C1	0.997981
KIAA2013	C1	0.767862
KIF20A	C1	0.99491
KIF22	C1	1
KLC2	C1	1
KLF10	C1	0.669391
KLF4	C1	0.997975
KLHDC3	C1	0.973666
KLHDC4	C1	0.484495
KLHL11	C1	0.999867
KLHL12	C1	0.977747
KNSTRN	C1	0.999627
KPNA3	C1	0.745346
KPNB1	C1	0.999977
KRI1	C1	0.999662
KRTCAP3	C1	0.999998
KTN1	C1	0.999821
L3MBTL2	C1	0.99867
LAMP1	C1	0.881361
LAMTOR2	C1	0.998677
LAMTOR3	C1	0.986995
LAMTOR4	C1	0.999996
LAMTOR5	C1	0.74248
LARP1B	C1	0.86461
LARS1	C1	0.810631
LAS1L	C1	0.99989
LASP1	C1	0.794899
LBR	C1	0.633999
LDB1	C1	0.993006
LENG1	C1	0.727117
LETM1	C1	0.933856
LGALS3BP	C1	0.661401
LGR6	C1	0.582329
LHPP	C1	0.999608
LHX2	C1	0.912957
LIAS	C1	0.950077
LIG1	C1	0.865021
LIMK2	C1	0.408583
LIPT1	C1	0.996064
LIPT2	C1	0.973941
LLGL1	C1	0.999945
LLGL2	C1	0.909978
LMAN1	C1	0.940592
LMAN2	C1	0.999996
LMBR1L	C1	0.791116
LMF2	C1	0.99987
LMNA	C1	0.924533
LMNB2	C1	0.999467
LMNTD2	C1	0.954839
LPAR2	C1	0.942551
LPAR3	C1	0.928875
LPCAT3	C1	0.999802
LPCAT4	C1	0.973442
LRP1	C1	0.749715
LRP10	C1	0.702322
LRPPRC	C1	0.956754
LRR1	C1	0.998052
LRRC14	C1	0.93036
LRRC20	C1	0.929922
LRRC27	C1	0.994854
LRRC42	C1	0.999726
LRRC47	C1	0.996051
LRRC61	C1	0.977091
LRRC8E	C1	0.849783
LRRN2	C1	0.915851
LRWD1	C1	0.999994
LSG1	C1	0.99895
LSM12	C1	0.991627
LSM4	C1	0.897945
LSM8	C1	0.99863
LTA	C1	0.873744
LTBR	C1	0.783979
LTN1	C1	0.426058
LY6K	C1	0.795236
LYPD3	C1	0.766505
LYSMD2	C1	0.797839
LYSMD4	C1	0.987583
LZTR1	C1	0.541025
M6PR	C1	0.999994
MACO1	C1	0.809526
MAD2L1BP	C1	0.999903
MAF1	C1	0.999999
MAGED1	C1	0.894425
MAGED2	C1	0.717351
MAIP1	C1	0.998604
MALSU1	C1	0.999999
MAN2B1	C1	0.553276
MAN2C1	C1	0.502686
MANBA	C1	0.990645
MANBAL	C1	0.997295
MANEA	C1	0.999984
MANEAL	C1	0.988192
MANSC1	C1	0.998654
MAP2K1	C1	0.577201
MAP2K3	C1	0.982155
MAP3K3	C1	0.639189
MAP3K6	C1	0.599817
MAP3K9	C1	0.990396
MAP4K2	C1	0.961137
MAP9	C1	0.38246
MAPK7	C1	0.9895
MAPK8IP3	C1	0.650588
MAPKAPK3	C1	0.999935
MAPRE1	C1	0.970634
MARCKSL1	C1	0.998359
MARS1	C1	0.997274
MAT2A	C1	0.786104
MATK	C1	0.888348
MBD1	C1	0.902277
MBD3	C1	0.980318
MBOAT7	C1	0.999946
MCCC1	C1	0.489226
MCFD2	C1	0.994645
MCM10	C1	0.994903
MCM2	C1	0.999998
MCM3	C1	0.999999
MCM4	C1	0.99999
MCM5	C1	0.999148
MCM6	C1	0.999508
MCRIP2	C1	0.671087
MCRS1	C1	0.999577
MDH1	C1	0.999844
MDH2	C1	0.999798
MDN1	C1	0.998886
MECR	C1	0.999993
MED11	C1	0.999997
MED16	C1	0.999373
MED19	C1	0.556472
MED21	C1	0.99917
MED30	C1	0.652077
MED31	C1	0.994049
MED4	C1	0.99997
MED7	C1	0.986132
MED9	C1	0.99917
MEGF9	C1	0.995146
MELK	C1	0.991161
MEN1	C1	0.997122
METAP1	C1	0.744627
METTL18	C1	0.849121
METTL22	C1	0.999984
METTL3	C1	0.999935
METTL8	C1	0.401506
MFAP3	C1	0.900077
MFSD1	C1	0.995896
MFSD13A	C1	0.989171
MFSD3	C1	0.778171
MFSD5	C1	0.966079
MFSD6L	C1	0.958075
MFSD9	C1	0.890022
MGAT4B	C1	0.999291
MGST2	C1	0.777318
MICOS13	C1	0.998326
MIEF1	C1	0.996411
MIEF2	C1	0.949179
MIF	C1	0.906487
MIIP	C1	0.997287
MINDY3	C1	0.899967
MINPP1	C1	0.999727
MIOS	C1	0.878599
MIPEP	C1	0.992546
MIS12	C1	0.999824
MIS18A	C1	0.913221
MISP	C1	0.390777
MISP3	C1	0.762653
MKI67	C1	0.998292
MKKS	C1	0.999978
MLF1	C1	0.99948
MLF2	C1	0.999989
MLST8	C1	0.999967
MLX	C1	0.99808
MLXIP	C1	0.999671
MMACHC	C1	0.999748
MMADHC	C1	0.99999
MMP15	C1	0.999877
MND1	C1	0.973956
MNS1	C1	0.355499
MOB3C	C1	0.776775
MOCS3	C1	0.999948
MOGS	C1	0.999589
MON1A	C1	0.999997
MON1B	C1	0.771714
MORN1	C1	0.969256
MORN2	C1	0.609477
MORN4	C1	0.959762
MOSPD3	C1	0.999995
MPC2	C1	0.997595
MPDU1	C1	0.99994
MPHOSPH8	C1	0.999746
MPPE1	C1	0.992706
MPRIP	C1	0.998567
MPST	C1	0.959562
MRI1	C1	0.907764
MRM2	C1	0.999386
MRNIP	C1	0.983834
MRPL11	C1	0.981085
MRPL13	C1	0.999316
MRPL16	C1	0.965752
MRPL22	C1	0.976328
MRPL24	C1	0.998161
MRPL3	C1	0.988235
MRPL39	C1	0.999713
MRPL44	C1	0.999986
MRPL45	C1	0.998674
MRPL50	C1	0.99884
MRPL53	C1	0.993875
MRPL55	C1	0.999989
MRPL57	C1	0.817491
MRPL9	C1	0.999631
MRPS12	C1	0.813431
MRPS2	C1	0.997046
MRPS21	C1	0.999928
MRPS22	C1	0.980048
MRPS23	C1	0.971174
MRPS27	C1	0.999963
MRPS30	C1	0.985418
MRPS31	C1	0.829837
MRPS34	C1	0.999662
MRPS7	C1	0.999317
MRPS9	C1	0.998952
MSANTD4	C1	0.998705
MSH3	C1	0.803752
MSH4	C1	0.413697
MSL1	C1	0.708355
MSTO1	C1	0.986217
MTA1	C1	0.95315
MTA2	C1	0.999688
MTCH2	C1	0.982721
MTDH	C1	0.995641
MTERF2	C1	0.999388
MTERF3	C1	0.892329
MTERF4	C1	0.99999
MTFMT	C1	0.996502
MTFR1L	C1	0.994927
MTFR2	C1	0.600793
MTG1	C1	0.99998
MTG2	C1	0.999999
MTHFD2L	C1	0.494943
MTHFSD	C1	0.849448
MTIF2	C1	0.926325
MTIF3	C1	0.99997
MTM1	C1	0.418167
MTO1	C1	0.762693
MTRF1L	C1	0.998713
MTSS1	C1	0.756808
MTX2	C1	0.853894
MUL1	C1	0.999988
MUS81	C1	0.947517
MVB12A	C1	0.948714
MVD	C1	0.699972
MVP	C1	0.983291
MYCL	C1	0.95736
MYDGF	C1	0.999986
MYL10	C1	0.974973
NAA10	C1	0.998004
NAA30	C1	0.961762
NABP2	C1	0.999989
NACC1	C1	0.999997
NAE1	C1	0.999943
NAF1	C1	0.988961
NAGPA	C1	0.693173
NANP	C1	0.9984
NANS	C1	0.932938
NARS1	C1	0.948592
NAT10	C1	0.999796
NAXE	C1	0.999803
NBN	C1	0.955129
NCAPD3	C1	0.919091
NCAPG	C1	0.96507
NCAPH	C1	0.981481
NCAPH2	C1	0.964529
NCBP3	C1	0.918398
NCDN	C1	0.999998
NCKIPSD	C1	0.989754
ND2	C1	0.766505
ND4	C1	0.99108
ND5	C1	0.748282
NDUFAF1	C1	0.999853
NDUFAF5	C1	0.97854
NDUFAF7	C1	0.795232
NDUFB3	C1	0.974011
NDUFC2	C1	0.984031
NDUFS1	C1	0.843541
NDUFS4	C1	0.998815
NDUFS5	C1	0.98768
NDUFV1	C1	0.526132
NDUFV3	C1	0.896973
NECAP1	C1	0.971137
NEK2	C1	0.999858
NENF	C1	0.99974
NEPRO	C1	0.996725
NETO2	C1	0.733977
NEU1	C1	0.99172
NEXN	C1	0.578893
NFATC2IP	C1	0.999998
NFIC	C1	0.772798
NFKBID	C1	0.991712
NFKBIE	C1	0.999954
NFU1	C1	0.999556
NGDN	C1	0.976449
NHLRC3	C1	0.999633
NIF3L1	C1	0.997547
NIP7	C1	0.999888
NIT2	C1	0.998308
NKAP	C1	0.913154
NKAPD1	C1	1
NKIRAS2	C1	0.999987
NLGN2	C1	0.986546
NLRC5	C1	0.965677
NMD3	C1	0.995358
NME1	C1	0.946793
NME2	C1	0.999098
NME6	C1	0.998971
NMI	C1	0.638417
NOA1A	C1	0.999974
NOB1	C1	0.999814
NOC3L	C1	0.777066
NOL11	C1	0.999821
NOL6	C1	0.568837
NOL9	C1	0.998352
NOLC1	C1	0.999819
NOP10	C1	0.811272
NOP2	C1	0.999608
NOP53	C1	0.999937
NOP56	C1	0.998907
NOP58	C1	0.999998
NOP9	C1	0.999999
NOPCHAP1	C1	0.999459
NOSIP	C1	0.999821
NPAS2	C1	0.996709
NPC1	C1	0.517322
NPC2	C1	0.827463
NPDC1	C1	0.970246
NPEPL1	C1	0.535888
NPM3	C1	0.999256
NPRL2	C1	1
NR2C2AP	C1	0.99952
NR4A2	C1	0.96149
NR4A3	C1	0.991692
NRIP3	C1	0.991581
NRM	C1	0.976628
NSFL1C	C1	0.996864
NSMCE1	C1	1
NSMCE4A	C1	0.999849
NSUN2	C1	0.717458
NT5C	C1	1
NT5C3B	C1	0.998586
NTAN1	C1	0.999937
NTHL1	C1	0.9371
NTMT1	C1	0.928912
NTPCR	C1	0.999999
NUB1	C1	0.739877
NUBP2	C1	0.999818
NUDCD1	C1	0.999666
NUDCD2	C1	0.968741
NUDCD3	C1	0.999969
NUDT1	C1	0.85977
NUDT16L1	C1	0.9924
NUDT17	C1	0.999999
NUDT2	C1	0.999975
NUDT21	C1	0.994089
NUDT22	C1	0.999863
NUDT7	C1	0.97725
NUF2	C1	0.992778
NUFIP1	C1	0.9996
NUP107	C1	0.615949
NUP205	C1	0.666317
NUP62	C1	0.999489
NUP85	C1	0.669777
NUP88	C1	0.995307
NUS1	C1	0.984509
NXT2	C1	0.962894
OAZ2	C1	0.999371
OGFOD1	C1	0.999996
OGFOD2	C1	0.90662
OGFOD3	C1	0.999967
OGFR	C1	0.999934
OGG1	C1	0.99998
OLA1	C1	0.9995
OPTN	C1	0.61239
ORC1	C1	0.740056
ORC6	C1	0.994153
ORMDL3	C1	0.850521
OS9	C1	0.781087
OSGEP	C1	0.999995
OSTM1	C1	0.999655
OSTN	C1	0.873744
OTUB1	C1	0.974264
OTUB2	C1	0.634926
OXA1L	C1	0.999911
OXLD1	C1	0.932796
P3H1	C1	0.569075
P4HA1	C1	0.943499
PAFAH1B3	C1	0.972592
PAFAH2	C1	0.999248
PAK1IP1	C1	0.901651
PANK4	C1	0.862253
PAPOLB	C1	0.64133
PAPPA	C1	0.997377
PARD6A	C1	0.997391
PARK7	C1	0.999934
PARL	C1	0.892493
PARP1	C1	0.999837
PARP14	C1	0.704112
PARP2	C1	0.999241
PARPBP	C1	0.979072
PARVG	C1	0.428702
PASK	C1	0.944774
PAX9	C1	0.935458
PAXX	C1	0.890633
PCBP1	C1	0.9889
PCDH1	C1	0.932549
PCED1A	C1	0.830105
PCGF1	C1	0.72735
PCGF2	C1	0.616828
PCIF1	C1	0.999996
PCLAF	C1	0.999502
PCMT1	C1	0.999997
PCNA	C1	0.946541
PCNP	C1	0.868628
PCYT1A	C1	0.748441
PDCD11	C1	0.999162
PDCD5	C1	0.999908
PDCD7	C1	0.981026
PDHA1	C1	0.909853
PDHB	C1	0.999979
PDIA3	C1	0.986492
PDIA5	C1	0.772619
PDRG1	C1	0.999831
PDSS1	C1	0.89039
PDXDC1	C1	0.611921
PDZD11	C1	0.982154
PDZK1	C1	0.934085
PEF1	C1	0.88139
PEG10	C1	0.546925
PELI2	C1	0.735746
PELO	C1	0.518665
PEPD	C1	0.998039
PES1	C1	0.999201
PEX11B	C1	0.511611
PEX12	C1	0.999972
PEX16	C1	0.992484
PEX19	C1	0.994724
PEX2	C1	0.997746
PEX5	C1	0.999999
PFAS	C1	0.790825
PFDN5	C1	0.999381
PFDN6	C1	0.999999
PFKL	C1	0.967144
PFKM	C1	0.971641
PGAM5	C1	0.999999
PGAP2	C1	0.882868
PGD	C1	0.995082
PGGHG	C1	0.555575
PGM2	C1	0.999952
PGM3	C1	0.996164
PGP	C1	0.999984
PGRMC1	C1	0.999938
PHF14	C1	0.923601
PHF23	C1	0.999972
PHF5A	C1	0.997731
PHKG1	C1	0.893503
PHTF1	C1	0.554525
PI4K2B	C1	0.927036
PI4KB	C1	0.957373
PIAS3	C1	0.908183
PIAS4	C1	0.995139
PIGF	C1	0.997581
PIGH	C1	0.931855
PIGL	C1	0.643885
PIGM	C1	0.951062
PIGO	C1	0.990364
PIGQ	C1	0.999711
PIGS	C1	0.994524
PIGT	C1	0.99998
PIGW	C1	0.999809
PIK3AP1	C1	0.374011
PINK1	C1	0.999945
PITRM1	C1	0.999441
PITX3	C1	0.442448
PJA1	C1	0.99979
PJA2	C1	0.976127
PKMYT1	C1	0.916797
PLA2G15	C1	0.756429
PLA2G1B	C1	0.80152
PLA2G4A	C1	0.733017
PLAA	C1	0.974524
PLAAT1	C1	0.353322
PLAGL2	C1	0.961383
PLBD1	C1	0.521038
PLD3	C1	0.998544
PLEKHA3	C1	0.999953
PLEKHF2	C1	0.6723
PLEKHJ1	C1	0.999987
PLEKHM2	C1	0.992664
PLEKHO1	C1	0.996893
PLIN2	C1	0.965743
PLOD3	C1	0.992105
PLRG1	C1	0.974411
PML	C1	0.907977
PMPCA	C1	0.999987
PMPCB	C1	0.946607
PMS1	C1	0.523072
PNMA1	C1	0.995003
PNPLA2	C1	0.974525
PNPO	C1	0.999952
POC1A	C1	0.999435
POGLUT1	C1	0.923185
POGLUT2	C1	0.960048
POLB	C1	0.997181
POLD2	C1	0.876324
POLDIP2	C1	0.99923
POLE4	C1	0.998197
POLL	C1	0.99996
POLR1A	C1	0.998347
POLR1B	C1	0.998261
POLR1C	C1	0.960436
POLR1E	C1	0.999983
POLR1H	C1	0.60584
POLR2C	C1	0.99999
POLR2D	C1	0.999896
POLR2E	C1	0.999998
POLR2H	C1	0.999984
POLR2K	C1	0.817106
POLR3A	C1	0.993257
POLR3C	C1	0.999373
POLR3D	C1	0.999979
POMGNT1	C1	0.994979
POMGNT2	C1	0.957859
POMP	C1	0.990554
POMT1	C1	0.877691
POMT2	C1	0.999989
POP4	C1	0.807022
POP5	C1	0.999994
POP7	C1	0.999997
POPDC3	C1	0.543089
POR	C1	0.999991
PPA1	C1	0.999963
PPAT	C1	0.848684
PPFIA4	C1	0.257184
PPFIBP2	C1	0.915844
PPIB	C1	0.873129
PPIC	C1	0.998278
PPIE	C1	0.999791
PPIF	C1	1
PPIL2	C1	0.998292
PPM1G	C1	1
PPM1M	C1	0.997034
PPME1	C1	0.999862
PPOX	C1	0.999989
PPP1CA	C1	0.999953
PPP1R11	C1	0.997095
PPP1R35	C1	0.984331
PPP1R37	C1	0.553464
PPP1R8	C1	0.99718
PPP2R1B	C1	0.996723
PPP2R3C	C1	0.995875
PPP2R5A	C1	0.602395
PPP2R5B	C1	0.534237
PPP2R5D	C1	0.998904
PPP3R1	C1	0.995445
PPP4C	C1	0.979011
PPP6R2	C1	0.999473
PPWD1	C1	0.782291
PQBP1	C1	0.996205
PRADC1	C1	0.999856
PRAF2	C1	0.992702
PRCP	C1	0.509976
PRDX3	C1	0.686153
PRDX4	C1	0.994026
PRKAB1	C1	0.983467
PRKACA	C1	0.99998
PRKAG1	C1	0.986554
PRKD2	C1	0.948877
PRMT5	C1	1
PRMT7	C1	0.996113
PROSER2	C1	0.940464
PRPF18	C1	0.981433
PRPF19	C1	0.999999
PRPF31	C1	0.999983
PRPF4	C1	0.981275
PRPF4B	C1	0.897505
PRPF6	C1	0.999698
PRPF8	C1	0.998125
PRPS2	C1	0.651532
PRPSAP2	C1	0.945315
PRR14	C1	0.999311
PRR16	C1	0.993173
PRR3	C1	0.999999
PRRG2	C1	0.999996
PRXL2A	C1	0.932501
PSAP	C1	0.526616
PSIP1	C1	0.99938
PSMA1	C1	0.977809
PSMA4	C1	0.994507
PSMA5	C1	0.999884
PSMA6	C1	0.999157
PSMB2	C1	0.989245
PSMB3	C1	0.999985
PSMB4	C1	0.989836
PSMB5	C1	0.993549
PSMB6	C1	0.99962
PSMB7	C1	0.999956
PSMC2	C1	0.997853
PSMC3IP	C1	0.999819
PSMC4	C1	0.999773
PSMD1	C1	1
PSMD10	C1	0.895968
PSMD11	C1	0.698662
PSMD12	C1	0.752875
PSMD13	C1	0.999981
PSMD2	C1	0.999374
PSMD3	C1	0.99951
PSMD5	C1	0.999929
PSMD6	C1	0.715739
PSMD7	C1	0.995018
PSMD8	C1	0.999727
PSME1	C1	0.918999
PSME3	C1	0.999224
PSMF1	C1	0.958617
PSMG3	C1	0.999997
PSMG4	C1	0.964686
PSTK	C1	0.992241
PTBP1	C1	0.967463
PTCD2	C1	0.999967
PTCD3	C1	0.999744
PTCH2	C1	0.993708
PTDSS1	C1	0.705316
PTGS2	C1	0.393053
PTOV1	C1	0.983708
PTPA	C1	0.770775
PTPMT1	C1	1
PTRH1	C1	0.999295
PTRHD1	C1	0.605613
PUDP	C1	0.877255
PUF60	C1	0.780557
PUM3	C1	0.999907
PUS1	C1	0.99982
PUS3	C1	0.999999
PUS7	C1	0.999944
PUS7L	C1	0.98666
PWWP3A	C1	0.999962
PXMP2	C1	0.999082
PYCR1	C1	0.997379
PYCR3	C1	0.996836
QARS1	C1	0.999994
QDPR	C1	0.999996
QPCTL	C1	0.999958
QSOX2	C1	0.984701
QTRT1	C1	0.999686
QTRT2	C1	0.991232
R3HCC1	C1	0.98394
R3HDM4	C1	0.999717
RAB24	C1	0.999822
RAB35	C1	0.997147
RAB40C	C1	0.999968
RAB5B	C1	0.995431
RAB8A	C1	0.999877
RAB8B	C1	0.888123
RABAC1	C1	0.681663
RABGGTA	C1	0.993365
RAC3	C1	0.981275
RAD23A	C1	0.999997
RAD52	C1	0.998173
RAD9A	C1	0.994459
RADX	C1	0.767192
RAE1	C1	0.717976
RALY	C1	0.699561
RAMP2	C1	0.734209
RANGAP1	C1	0.997276
RANGRF	C1	0.908255
RAP1GDS1	C1	0.470975
RAP2B	C1	0.998346
RARA	C1	0.653404
RARS1	C1	0.999636
RASGEF1B	C1	0.898925
RASL11B	C1	0.996086
RASSF4	C1	0.883153
RBBP8NL	C1	0.887433
RBBP9	C1	0.999984
RBFA	C1	0.999132
RBM11	C1	0.999015
RBM14	C1	0.821223
RBM19	C1	0.920372
RBM28	C1	0.999999
RBM42	C1	0.973224
RCC1L	C1	0.99998
RELA	C1	0.992673
RER1	C1	0.990943
RESF1	C1	0.697059
RETREG2	C1	0.999995
REXO4	C1	0.648981
RFC3	C1	0.99904
RFC4	C1	0.999993
RFK	C1	0.999996
RFNG	C1	0.728245
RFXANK	C1	0.999995
RFXAP	C1	0.988102
RGMB	C1	0.98039
RGP1	C1	0.999991
RGS10	C1	0.931882
RHEBL1	C1	0.966141
RHNO1	C1	0.999009
RIC8A	C1	0.978115
RIMS3	C1	0.924331
RING1	C1	0.995678
RINT1	C1	0.999955
RIOK1	C1	0.999969
RIOK2	C1	0.998586
RIOX2	C1	0.999226
RIPK2	C1	0.992767
RIPK4	C1	0.390647
RITA1	C1	1
RMI2	C1	0.999899
RMND5A	C1	0.932208
RNASEH2A	C1	0.999971
RND1	C1	0.98456
RNF115	C1	0.880228
RNF126	C1	0.999224
RNF128	C1	0.414366
RNF151	C1	0.615683
RNF19B	C1	0.971516
RNF215	C1	0.304865
RNF216	C1	0.825799
RNF34	C1	0.970332
RNFT1	C1	0.812254
RNFT2	C1	0.95306
RNPEPL1	C1	0.981097
RPAP1	C1	0.999937
RPF1	C1	0.970376
RPF2	C1	0.989257
RPIA	C1	0.987332
RPL10A	C1	0.999844
RPL27	C1	0.99995
RPN2	C1	0.62556
RPS19BP1	C1	0.996412
RPS23	C1	0.999123
RPS6	C1	0.999871
RPS6KB1	C1	0.901753
RPS6KB2	C1	0.999649
RPS9	C1	0.872561
RPUSD2	C1	0.999915
RPUSD3	C1	0.999999
RPUSD4	C1	0.999482
RRAS	C1	0.997644
RRP1	C1	0.631144
RRP12	C1	0.999011
RRP36	C1	0.999999
RRP7	C1	0.594337
RRS1	C1	0.970544
RSAD1	C1	0.932414
RSBN1	C1	0.835075
RSL1D1	C1	0.983999
RTCA	C1	0.885267
RTCB	C1	0.894518
RTF1	C1	0.999815
RTF2	C1	0.999386
RTN2	C1	0.723475
RTN3	C1	0.607528
RWDD1	C1	0.989852
RWDD2A	C1	0.999973
RWDD2B	C1	0.996392
RXRA	C1	0.689053
S1PR3	C1	0.988924
SAMD15	C1	0.352882
SAMM50	C1	0.689226
SAP30	C1	0.988901
SAP30BP	C1	0.994748
SAPCD2	C1	0.731949
SART1	C1	0.998724
SAYSD1	C1	0.998842
SBSPON	C1	0.928205
SCAMP3	C1	0.999967
SCAMP4	C1	0.999814
SCAND1	C1	0.992731
SCO1	C1	0.9509
SDC3	C1	0.99981
SDC4	C1	0.998447
SDF2	C1	0.994524
SDF2L1	C1	0.800588
SDF4	C1	0.996029
SDR39U1	C1	0.985874
SEC16A	C1	0.997813
SEC61A1	C1	0.998847
SEC61B	C1	0.874434
SEC61G	C1	0.865245
SEC62	C1	0.970417
SEH1L	C1	0.999988
SELENOF	C1	0.957349
SELENOM	C1	0.848529
SELENOO	C1	0.640965
SELENOS	C1	0.986586
SEPTIN1	C1	0.992394
SEPTIN10	C1	0.326504
SEPTIN7	C1	0.970575
SERINC2	C1	0.717784
SERTAD2	C1	0.859907
SETD6	C1	0.999883
SF3A1	C1	0.981105
SF3A3	C1	1
SF3B2	C1	0.997563
SFXN4	C1	0.551884
SGF29	C1	0.915582
SGO1	C1	0.965948
SGSH	C1	0.874001
SGTA	C1	0.999955
SH2B1	C1	0.83167
SH2D5	C1	0.366401
SH3BGRL3	C1	0.958674
SH3GL1	C1	0.849367
SH3RF3	C1	0.766916
SHARPIN	C1	0.999418
SHCBP1	C1	0.880141
SHE	C1	0.772024
SIGMAR1	C1	0.982286
SIRT4	C1	0.975067
SIRT5	C1	0.999986
SIRT6	C1	0.999718
SIVA1	C1	0.987643
SKA1	C1	0.916111
SKIL	C1	0.558434
SLAIN1	C1	0.930156
SLC10A3	C1	0.999998
SLC12A2	C1	0.993182
SLC12A9	C1	0.492024
SLC15A4	C1	0.945012
SLC16A1	C1	0.99269
SLC16A13	C1	0.99867
SLC16A6	C1	0.812649
SLC17A9	C1	0.993095
SLC20A1	C1	0.999813
SLC24A1	C1	0.892747
SLC25A1	C1	0.941874
SLC25A11	C1	0.999995
SLC25A23	C1	0.990058
SLC25A33	C1	0.999941
SLC25A34	C1	0.994827
SLC25A35	C1	0.999482
SLC25A39	C1	0.999943
SLC25A5	C1	0.971977
SLC26A6	C1	0.372449
SLC29A2	C1	0.992013
SLC2A8	C1	0.99998
SLC30A1	C1	0.962639
SLC31A1	C1	0.999999
SLC31A2	C1	0.977155
SLC35A2	C1	0.999873
SLC35A3	C1	0.728186
SLC35B1	C1	0.938807
SLC35B2	C1	0.996917
SLC35C2	C1	0.996886
SLC37A4	C1	0.978351
SLC39A13	C1	0.853397
SLC39A7	C1	0.999923
SLC49A3	C1	0.993714
SLC4A2	C1	0.998809
SLC6A8	C1	0.678377
SLC7A1	C1	0.960548
SLC7A5	C1	0.999971
SLU7	C1	0.598087
SMAD7	C1	0.581863
SMAGP	C1	0.978068
SMARCA5	C1	0.982622
SMARCB1	C1	0.999988
SMCR8	C1	0.99958
SMG9	C1	0.973469
SMIM1	C1	0.501384
SMIM26	C1	0.999994
SMYD2	C1	0.830338
SNAI1	C1	0.999996
SNAPC2	C1	0.985074
SNAPC3	C1	0.683083
SNAPC5	C1	0.999998
SNAPIN	C1	0.991611
SNCB	C1	0.993569
SNF8	C1	0.986753
SNIP1	C1	0.996635
SNRNP200	C1	1
SNRNP40	C1	0.99736
SNRPA1	C1	0.957011
SNRPB2	C1	0.680349
SNRPD3	C1	0.776681
SNW1	C1	0.979466
SNX10	C1	0.95841
SNX16	C1	0.977165
SNX17	C1	0.999969
SNX19	C1	0.99846
SNX22	C1	0.828306
SNX3	C1	0.9946
SNX5	C1	0.994633
SOAT1	C1	0.999776
SOD2	C1	0.378455
SORT1	C1	0.817164
SPACA9	C1	0.675752
SPAG5	C1	0.902718
SPATA16	C1	0.436065
SPATA2	C1	0.999998
SPATA2L	C1	0.980258
SPC25	C1	0.99306
SPG7	C1	0.998452
SPHK2	C1	0.999967
SPINDOC	C1	0.861967
SPINT2	C1	0.995739
SPP1	C1	0.984385
SPPL2A	C1	0.998116
SPPL2B	C1	0.998875
SPRING1	C1	0.990819
SPRYD4	C1	0.958146
SPSB3	C1	0.764427
SREK1IP1	C1	0.943558
SRF	C1	0.997067
SRFBP1	C1	0.994973
SRI	C1	0.999262
SRP68	C1	0.999964
SRPK1	C1	0.996423
SRPRA	C1	0.977589
SRPRB	C1	0.999989
SRRD	C1	0.999931
SRRM2	C1	0.991145
SRRT	C1	0.999934
SRSF1	C1	0.909616
SRSF3	C1	0.99995
SSBP4	C1	0.777219
SSR1	C1	0.930488
SSR2	C1	0.997051
SSR4	C1	0.999959
SSRP1	C1	0.999998
ST6GALNAC2	C1	0.384034
STAMBP	C1	0.999739
STING1	C1	0.98629
STK16	C1	0.996697
STK25	C1	0.999859
STOML2	C1	0.99993
STRADB	C1	0.989099
STRAP	C1	0.990398
STRIP1	C1	0.966688
STRIP2	C1	0.588279
STRN4	C1	0.990281
STT3A	C1	0.999946
STUB1	C1	0.999855
STX4	C1	0.773422
STX8	C1	0.666767
SUCLG1	C1	0.999926
SUCO	C1	0.514764
SUDS3	C1	0.943356
SUGT1	C1	0.999619
SUMO3	C1	0.999648
SUPT5H	C1	0.999954
SURF1	C1	0.999905
SUV39H1	C1	0.999892
SUV39H2	C1	0.558264
SVBP	C1	0.910063
SWSAP1	C1	0.999684
SYCN	C1	0.995648
SYF2	C1	0.926783
SYNE4	C1	0.882582
SYNGR2	C1	0.835257
SYNM	C1	0.575936
SYP	C1	0.969352
SYPL1	C1	0.588954
SYT4	C1	0.407012
TAB1	C1	0.781566
TACR2	C1	0.811834
TACR3	C1	0.999361
TADA2A	C1	0.460646
TAF10	C1	0.999998
TAF11	C1	0.976989
TAF12	C1	0.783207
TAF1C	C1	0.99796
TAF5	C1	0.999925
TAF6L	C1	0.999983
TAF9B	C1	0.936161
TALDO1	C1	0.996611
TANGO2	C1	0.799271
TAPBP	C1	0.972065
TARBP2	C1	0.557216
TARS1	C1	0.999998
TARS3	C1	0.969766
TATDN1	C1	0.994082
TBC1D10B	C1	0.998708
TBC1D13	C1	0.999756
TBC1D25	C1	0.999941
TBC1D9B	C1	0.883931
TBCA	C1	0.974722
TBCC	C1	0.99856
TBL2	C1	0.901712
TBL3	C1	0.971661
TBPL1	C1	0.848526
TBRG1	C1	0.983514
TBRG4	C1	0.973556
TCAIM	C1	0.962313
TCEA3	C1	0.459833
TCF19	C1	0.94193
TCF25	C1	0.999998
TCOF1	C1	0.998853
TCTA	C1	0.991111
TDP1	C1	0.485271
TDP2	C1	0.999996
TEFM	C1	0.980345
TELO2	C1	0.432665
TENT4A	C1	0.588209
TERF1	C1	0.991347
TERF2IP	C1	0.999994
TEX12	C1	0.999148
TEX261	C1	0.999998
TFAM	C1	0.719785
TFAP2C	C1	0.989677
TFAP4	C1	0.986322
TFB2M	C1	0.999926
TFE3	C1	0.999979
TFIP11	C1	0.999196
TFPI2	C1	0.36897
TGFBRAP1	C1	0.993901
THAP11	C1	0.999998
THAP12	C1	0.998855
THAP7	C1	0.999868
THBS3	C1	0.77927
THG1L	C1	0.99657
THOC1	C1	0.993822
THOC3	C1	0.999967
THOC7	C1	0.895154
THOP1	C1	0.916215
THSD1	C1	0.717308
THUMPD1	C1	0.999968
TIMD4	C1	0.866233
TIMELESS	C1	0.999838
TIMM17A	C1	0.999943
TIMM17B	C1	0.999809
TIMM21	C1	0.999992
TIMM22	C1	0.999957
TIMM29	C1	0.999381
TIMM44	C1	0.877033
TIMM8A	C1	0.576877
TIPIN	C1	0.991204
TK1	C1	0.998814
TK2	C1	0.469615
TLCD3A	C1	0.94554
TLCD5	C1	0.954744
TLE3	C1	0.498571
TM2D2	C1	0.979739
TMBIM1	C1	0.99764
TMC4	C1	0.540796
TMCO1	C1	0.994589
[truncated: 16,640 more rows]

## Sheet: metabolism cluster
gene	cluster	membership
bta00053	1	0.836685
bta00230	1	0.495383
bta00260	1	0.590583
bta00340	1	0.703549
bta00510	1	0.986784
bta00513	1	0.988422
bta00640	1	0.873623
bta00980	1	0.654362
bta00982	1	0.875793
bta00061	2	0.911538
bta00232	2	0.743529
bta00250	2	0.74117
bta00532	2	0.820211
bta00601	2	0.683256
bta00140	3	0.864286
bta00290	3	0.84669
bta00533	3	0.918222
bta00670	3	0.972185
bta00730	3	0.332644
bta00740	3	0.919584
bta00770	3	0.864258
bta00785	3	0.509317
bta00010	4	0.992522
bta00020	4	0.99941
bta00030	4	0.98169
bta00051	4	0.778331
bta00120	4	0.890147
bta00190	4	0.999167
bta00240	4	0.78909
bta00270	4	0.971541
bta00330	4	0.930735
bta00350	4	0.993296
bta00360	4	0.996634
bta00480	4	0.997864
bta00520	4	0.91611
bta00590	4	0.726655
bta00620	4	0.996755
bta00630	4	0.998116
bta00750	4	0.537274
bta00790	4	0.879786
bta00860	4	0.954518
bta00983	4	0.972248
bta00130	5	0.840152
bta00310	5	0.995978
bta00450	5	0.907783
bta00470	5	0.984616
bta00512	5	0.990828
bta00514	5	0.650847
bta00515	5	0.454619
bta00534	5	0.976169
bta00561	5	0.527318
bta00562	5	0.999258
bta00564	5	0.880551
bta00600	5	0.954919
bta00604	5	0.918737
bta00760	5	0.782652
bta00780	5	0.926846
bta00920	5	0.905556
bta00071	6	0.785284
bta00220	6	0.851869
bta00400	6	0.540879
bta00440	6	0.636018
bta00563	6	0.835943
bta00591	6	0.423993
bta00592	6	0.523382
bta00910	6	0.642881
bta00970	6	0.388799
bta00052	7	0.95882
bta00650	7	0.953323
bta00430	7	0.849406
bta00410	7	0.729973
bta00900	7	0.729284
bta00541	7	0.618349
bta00511	7	0.59407
bta00380	7	0.588034
bta00040	7	0.488661
bta00062	7	0.459408
bta00100	7	0.418135
bta00830	7	0.249445
bta00524	8	0.968542
bta00500	8	0.85404
bta00565	8	0.791883
bta00280	8	0.763537
bta00603	8	0.714426
bta00531	8	0.632058
