# Supplementary material for: A longitudinal single-nucleus transcriptomic atlas of the bovine placenta reveals dynamic cellular hierarchies and regulatory networks during gestation
Source: Research Square preprint supplement (doi:10.21203/rs.3.rs-8046408/v1), 2025-11-26
Supplement: Supplementary file 7 [file b8d86a9507e8c826b80721d5.xlsx]

## Sheet: S1
Cow_Tro_regulon
ARID3B(+)
BACH2(+)
BCL11A(+)
BCLAF1(+)
BHLHE40(+)
BHLHE41(+)
CEBPB(+)
CEBPD(+)
CEBPE(+)
CLOCK(+)
CREM(+)
DBP(+)
DLX2(+)
DLX3(+)
DLX6(+)
DRGX(+)
E2F1(+)
E2F3(+)
E2F7(+)
E2F8(+)
EGR1(+)
ELF1(+)
ELF2(+)
ELF3(+)
ELF5(+)
ELK1(+)
ELK3(+)
ELK4(+)
ERF(+)
ERG(+)
ESR2(+)
ETS1(+)
ETS2(+)
ETV2(+)
ETV3(+)
ETV4(+)
ETV5(+)
ETV6(+)
FEV(+)
FLI1(+)
FOS(+)
FOSB(+)
FOSL2(+)
FOXA1(+)
FOXA3(+)
FOXM1(+)
FOXO1(+)
GABPA(+)
GATA1(+)
GATA2(+)
GATA3(+)
GATA4(+)
GATA5(+)
GATA6(+)
GBX1(+)
GFI1B(+)
GLI3(+)
GTF2IRD1(+)
HAND1(+)
HAND2(+)
HEY1(+)
HLF(+)
HMGA2(+)
HNF1B(+)
HNF4A(+)
HNF4G(+)
HOXA13(+)
HOXA4(+)
HOXA5(+)
HOXB2(+)
HOXD10(+)
HOXD13(+)
IKZF2(+)
IRF1(+)
IRF2(+)
IRF3(+)
IRF5(+)
IRF6(+)
IRF7(+)
IRF8(+)
IRF9(+)
ISL1(+)
JUN(+)
JUNB(+)
JUND(+)
KLF10(+)
KLF4(+)
KLF5(+)
KLF6(+)
LBX2(+)
LEF1(+)
MAF(+)
MAFA(+)
MAFB(+)
MAFF(+)
MAFG(+)
MAFK(+)
MAX(+)
MEIS3(+)
MITF(+)
MNT(+)
MXD1(+)
MYB(+)
MYBL1(+)
MYBL2(+)
MYC(+)
MYF5(+)
MZF1(+)
NANOG(+)
NFATC1(+)
NFE2(+)
NFE2L1(+)
NFE2L2(+)
NFIA(+)
NFYA(+)
NFYB(+)
NFYC(+)
NKX2-1(+)
NKX6-2(+)
NR1H3(+)
NR1H4(+)
NR1I2(+)
NR2F1(+)
NR2F2(+)
NR3C1(+)
NR5A1(+)
ONECUT1(+)
OTX1(+)
OVOL2(+)
PAX7(+)
PBX1(+)
PITX3(+)
POU2F1(+)
POU2F3(+)
POU5F1(+)
PPARD(+)
RARA(+)
RARB(+)
RARG(+)
RAX(+)
RFX1(+)
RFX2(+)
RFX5(+)
RFXANK(+)
RUNX2(+)
RUNX3(+)
RXRA(+)
RXRG(+)
SMAD1(+)
SOX10(+)
SOX15(+)
SOX9(+)
SPI1(+)
SPIB(+)
SREBF1(+)
SREBF2(+)
SRF(+)
STAT1(+)
STAT2(+)
STAT5A(+)
STAT6(+)
TBX21(+)
TBX3(+)
TBX5(+)
TCF12(+)
TCF4(+)
TCF7(+)
TCF7L2(+)
TEAD3(+)
TFAP2C(+)
TFE3(+)
TFEB(+)
THRA(+)
THRB(+)
TRPS1(+)
UNCX(+)
WT1(+)
XBP1(+)
YY1(+)
ZBTB14(+)
ZBTB26(+)
ZBTB49(+)
ZBTB7A(+)
ZBTB7B(+)
ZEB1(+)
ZNF202(+)
ZNF205(+)
ZNF354C(+)
ZNF398(+)
ZNF557(+)

## Sheet: S2
	Cluster	regulon
CEBPE(+)	1	CEBPE(+)
E2F1(+)	1	E2F1(+)
E2F8(+)	1	E2F8(+)
ELF5(+)	1	ELF5(+)
ISL1(+)	1	ISL1(+)
MYBL2(+)	1	MYBL2(+)
MYC(+)	1	MYC(+)
NFE2(+)	1	NFE2(+)
OTX1(+)	1	OTX1(+)
RAX(+)	1	RAX(+)
RFXANK(+)	1	RFXANK(+)
SOX10(+)	1	SOX10(+)
SOX15(+)	1	SOX15(+)
UNCX(+)	1	UNCX(+)
ZNF205(+)	1	ZNF205(+)
CEBPD(+)	2	CEBPD(+)
DLX3(+)	2	DLX3(+)
DLX6(+)	2	DLX6(+)
ELF3(+)	2	ELF3(+)
ETV2(+)	2	ETV2(+)
FOS(+)	2	FOS(+)
GATA6(+)	2	GATA6(+)
HAND1(+)	2	HAND1(+)
HEY1(+)	2	HEY1(+)
IRF5(+)	2	IRF5(+)
IRF7(+)	2	IRF7(+)
IRF9(+)	2	IRF9(+)
JUND(+)	2	JUND(+)
PITX3(+)	2	PITX3(+)
RARA(+)	2	RARA(+)
RARG(+)	2	RARG(+)
TFAP2C(+)	2	TFAP2C(+)
TFEB(+)	2	TFEB(+)
ZBTB7A(+)	2	ZBTB7A(+)
DBP(+)	3	DBP(+)
FLI1(+)	3	FLI1(+)
FOXA1(+)	3	FOXA1(+)
FOXA3(+)	3	FOXA3(+)
GATA4(+)	3	GATA4(+)
GATA5(+)	3	GATA5(+)
GBX1(+)	3	GBX1(+)
GFI1B(+)	3	GFI1B(+)
GLI3(+)	3	GLI3(+)
HAND2(+)	3	HAND2(+)
HNF4A(+)	3	HNF4A(+)
HOXB2(+)	3	HOXB2(+)
LBX2(+)	3	LBX2(+)
MAFB(+)	3	MAFB(+)
NANOG(+)	3	NANOG(+)
NR2F1(+)	3	NR2F1(+)
SPI1(+)	3	SPI1(+)
ZNF202(+)	3	ZNF202(+)
ZNF354C(+)	3	ZNF354C(+)
MAFK(+)	3	MAFK(+)
NKX6-2(+)	3	NKX6-2(+)
POU5F1(+)	3	POU5F1(+)
BCLAF1(+)	4	BCLAF1(+)
EGR1(+)	4	EGR1(+)
FOSB(+)	4	FOSB(+)
GATA3(+)	4	GATA3(+)
GTF2IRD1(+)	4	GTF2IRD1(+)
JUNB(+)	4	JUNB(+)
KLF5(+)	4	KLF5(+)
MAF(+)	4	MAF(+)
OVOL2(+)	4	OVOL2(+)
STAT1(+)	4	STAT1(+)
STAT6(+)	4	STAT6(+)
BACH2(+)	4	BACH2(+)
ELF1(+)	4	ELF1(+)
ELK1(+)	4	ELK1(+)
ELK4(+)	4	ELK4(+)
ESR2(+)	4	ESR2(+)
ETV3(+)	4	ETV3(+)
GATA2(+)	4	GATA2(+)
HNF4G(+)	4	HNF4G(+)
HOXA5(+)	4	HOXA5(+)
JUN(+)	4	JUN(+)
KLF10(+)	4	KLF10(+)
KLF4(+)	4	KLF4(+)
KLF6(+)	4	KLF6(+)
MAFF(+)	4	MAFF(+)
MAFG(+)	4	MAFG(+)
MITF(+)	4	MITF(+)
NFATC1(+)	4	NFATC1(+)
NFE2L1(+)	4	NFE2L1(+)
NFE2L2(+)	4	NFE2L2(+)
NFYC(+)	4	NFYC(+)
POU2F3(+)	4	POU2F3(+)
PPARD(+)	4	PPARD(+)
RFX1(+)	4	RFX1(+)
RFX5(+)	4	RFX5(+)
SMAD1(+)	4	SMAD1(+)
SPIB(+)	4	SPIB(+)
WT1(+)	4	WT1(+)
E2F3(+)	5	E2F3(+)
E2F7(+)	5	E2F7(+)
ELF2(+)	5	ELF2(+)
GATA1(+)	5	GATA1(+)
HMGA2(+)	5	HMGA2(+)
IKZF2(+)	5	IKZF2(+)
IRF2(+)	5	IRF2(+)
MAFA(+)	5	MAFA(+)
MYB(+)	5	MYB(+)
MYBL1(+)	5	MYBL1(+)
NFIA(+)	5	NFIA(+)
POU2F1(+)	5	POU2F1(+)
RARB(+)	5	RARB(+)
SOX9(+)	5	SOX9(+)
YY1(+)	5	YY1(+)
ZBTB49(+)	5	ZBTB49(+)
BCL11A(+)	6	BCL11A(+)
ETS1(+)	6	ETS1(+)
FOSL2(+)	6	FOSL2(+)
HNF1B(+)	6	HNF1B(+)
IRF6(+)	6	IRF6(+)
LEF1(+)	6	LEF1(+)
MYF5(+)	6	MYF5(+)
RFX2(+)	6	RFX2(+)
RUNX2(+)	6	RUNX2(+)
RUNX3(+)	6	RUNX3(+)
STAT5A(+)	6	STAT5A(+)
TBX5(+)	6	TBX5(+)
THRB(+)	6	THRB(+)
TRPS1(+)	6	TRPS1(+)
ZNF398(+)	6	ZNF398(+)
ARID3B(+)	7	ARID3B(+)
BHLHE40(+)	7	BHLHE40(+)
BHLHE41(+)	7	BHLHE41(+)
CEBPB(+)	7	CEBPB(+)
ETV6(+)	7	ETV6(+)
FOXO1(+)	7	FOXO1(+)
MZF1(+)	7	MZF1(+)
NFYA(+)	7	NFYA(+)
NR1H4(+)	7	NR1H4(+)
NR2F2(+)	7	NR2F2(+)
PAX7(+)	7	PAX7(+)
PBX1(+)	7	PBX1(+)
SREBF1(+)	7	SREBF1(+)
TBX3(+)	7	TBX3(+)
TCF7L2(+)	7	TCF7L2(+)
CLOCK(+)	8	CLOCK(+)
CREM(+)	8	CREM(+)
ELK3(+)	8	ELK3(+)
ERF(+)	8	ERF(+)
ETS2(+)	8	ETS2(+)
GABPA(+)	8	GABPA(+)
IRF8(+)	8	IRF8(+)
MAX(+)	8	MAX(+)
NR1H3(+)	8	NR1H3(+)
NR3C1(+)	8	NR3C1(+)
SREBF2(+)	8	SREBF2(+)
TBX21(+)	8	TBX21(+)
TCF7(+)	8	TCF7(+)
TEAD3(+)	8	TEAD3(+)
ZBTB7B(+)	8	ZBTB7B(+)
ZEB1(+)	8	ZEB1(+)
